# Supplementary material for: Independent evolution of transcript abundance and gene regulatory dynamics
Source: HighWire-hosted journal article supplement (doi:10.1101/gr.261537.120), 2020-07-01
Supplement: Supplemental_Table_S2.xlsx [file Supplemental_Table_S2.xlsx]

## Sheet: description
Table S2	list of strains used in the study

## Sheet: Sheet1
	strain	genotype	source	plasmid used for making the strain
1	BY4741	MATa his3Δ1 leu2Δ0 met15Δ0 ura3Δ0
2	BY4742	MATα his3Δ1 leu2Δ0 lys2Δ0 ura3Δ0
3	S. cerevisiae a GFP WT	BY4741 HO::NatR-GFP	this study	pFA6-TEF2pr-eGFP-ADH1tr-TEF2pr-NatMX4
4	S. cereivisiae alpha GFP WT	BY4742 HO::HygR-GFP	this study	pBS34-TDH3pr-eGFP-ADH1tr-TEF2pr-Hph
5	S. cerevisiae diploid	strain 3 x strain 4	this study
6	S. paradoxus a mCherry WT	OS142 MATa HO::NatR-mCherry	Tirosh et al., 2009
7	S. paradoxus alpha mCherry WT	OS142 MATα ho::HygR-mCherry	Tirosh et al., 2009
8	S. paradoxus diploid	strain 3 x strain 4	this study
9	Hybrid	strain 3 x strain 6	this study
10	Hybrid in cell-cycle experiments	strain 3 x strain 6	Herbst et al., 2017
11	S. cerevisiae a ΔTFX	strain 3 TFXΔ::KanR	this study	pBS7
12	S. cerevisiae alpha ΔTFX	strain 4 TFXΔ::KanR	this study	pBS7
13	S. cereivisae diploid	strain 11 x strain 12	this study	pBS7
14	S. paradoxus a ΔTFX	strain 6 TFXΔ::KanR	this study	pBS7
15	S. paradoxus alpha ΔTFX	strain 7 TFXΔ::KanR	this study	pBS7
16	S. paradoxus a ΔTFX	strain 14 x strain 15	this study	pBS7
17	Hybrid ΔTFX	strain 11 x strain 15	this study	pBS7
* ΔTFX referes to the deletion of each of the 46 transcription factors listed in Table S1
