# Supplementary material for: Independent evolution of transcript abundance and gene regulatory dynamics
Source: HighWire-hosted journal article supplement (doi:10.1101/gr.261537.120), 2020-07-01
Supplement: Supplemental_Table_S3.xlsx [file Supplemental_Table_S3.xlsx]

## Sheet: Sheet1
sample_name	strain	species	experiment_type	timepoint	time_from_experiment_start_min	medium	condition	experiment_ID	well_in_experiment	glycerol_stock_ID	library_ID	inner_barcode_index	well_in_lib
PHD1_TP3_cer_C1_E4_H7_GS3	PHD1	cer	YPD_to_Low_N	TP3	960	low N	PHD1.YPD_to_Low_N.960	C1	E4	H7	GS3	ACTGCAG	29
FKH1_TP3_cer_C1_A1_B1_GS3	FKH1	cer	YPD_to_Low_N	TP3	960	low N	FKH1.YPD_to_Low_N.960	C1	A1	B1	GS3	CTATTCG	1
MIG1_TP2_hyb_P3H1_B6_D10_GS6	MIG1	hyb	YPD_to_Low_N	TP2	60	low N	MIG1.YPD_to_Low_N.60	P3H1	B6	D10	GS6	CACAGAT	90
DAL80_TP2_hyb_H2_B6_E11_GS4	DAL80	hyb	YPD_to_Low_N	TP2	60	low N	DAL80.YPD_to_Low_N.60	H2	B6	E11	GS4	GATCACA	42
CHA4_TP2_hyb_H3_B1_C4_GS12	CHA4	hyb	YPD_to_Low_N	TP2	60	low N	CHA4.YPD_to_Low_N.60	H3	B1	C4	GS12	CTGTGAG	34
ARG81_TP2_par_remnants2_H2_F9_GS8	ARG81	par	YPD_to_Low_N	TP2	60	low N	ARG81.YPD_to_Low_N.60	remnants2	H2	F9	GS8	AGGCGTT	52
HAP5_TP1_cer_C3_E5_C12_GS7	HAP5	cer	YPD_to_Low_N	TP1	0	YPD	HAP5.YPD_to_Low_N.0	C3	E5	C12	GS7	TGCCTAA	85
AFT1_TP1_hyb_P3H1_C3_H4_GS6	AFT1	hyb	YPD_to_Low_N	TP1	0	YPD	AFT1.YPD_to_Low_N.0	P3H1	C3	H4	GS6	GGATCTA	19
MET28_TP2_cer_C1_C6_D12_GS1	MET28	cer	YPD_to_Low_N	TP2	60	low N	MET28.YPD_to_Low_N.60	C1	C6	D12	GS1	CTTCGAA	91
SKN7_TP3_par_P3H1_A4_D7_GS7	SKN7	par	YPD_to_Low_N	TP3	960	low N	SKN7.YPD_to_Low_N.960	P3H1	A4	D7	GS7	CCTAAGG	25
DAL80_TP3_hyb_H2_B3_E5_GS4	DAL80	hyb	YPD_to_Low_N	TP3	960	low N	DAL80.YPD_to_Low_N.960	H2	B3	E5	GS4	CAATCGA	66
SOK2_TP2_hyb_P3H1_C5_A8_GS6	SOK2	hyb	YPD_to_Low_N	TP2	60	low N	SOK2.YPD_to_Low_N.60	P3H1	C5	A8	GS6	CGAGTCT	83
MIG1_TP1_cer_P4C2_G4_D10_GS9a	MIG1	cer	YPD_to_Low_N	TP1	0	YPD	MIG1.YPD_to_Low_N.0	P4C2	G4	D10	GS9a	CGCATAT	31
HAP5_TP2_cer_C3_E2_C6_GS8	HAP5	cer	YPD_to_Low_N	TP2	60	low N	HAP5.YPD_to_Low_N.60	C3	E2	C6	GS8	TGCACAA	13
YAP1_TP2_hyb_P3H1_G2_C3_GS6	YAP1	hyb	YPD_to_Low_N	TP2	60	low N	YAP1.YPD_to_Low_N.60	P3H1	G2	C3	GS6	AACAGCT	63
DAL80_TP2_par_P1_G2_E5_GS2	DAL80	par	YPD_to_Low_N	TP2	60	low N	DAL80.YPD_to_Low_N.60	P1	G2	E5	GS2	GATCACA	42
PHD1_TP2_cer_remnants_A4_H1_GS10	PHD1	cer	YPD_to_Low_N	TP2	60	low N	PHD1.YPD_to_Low_N.60	remnants	A4	H1	GS10	CTACAAG	48
ACE2_TP1_cer_C3_A1_A1_GS7	ACE2	cer	YPD_to_Low_N	TP1	0	YPD	ACE2.YPD_to_Low_N.0	C3	A1	A1	GS7	CATGAAC	49
WT_TP3_par_P5_D3_G6_GS14	WT	par	YPD_to_Low_N	TP3	960	low N	WT.YPD_to_Low_N.960	P5	D3	G6	GS14	TACCAGT	20
CBF1_TP1_cer_slow_E3_H3_GS10	CBF1	cer	YPD_to_Low_N	TP1	0	YPD	CBF1.YPD_to_Low_N.0	slow	E3	H3	GS10	CTGATGG	69
HAP2_TP3_hyb_H3_E4_H11_GS12	HAP2	hyb	YPD_to_Low_N	TP3	960	low N	HAP2.YPD_to_Low_N.960	H3	E4	H11	GS12	CGGATTA	76
TEC1_TP3_cer_C1_H1_D2_GS3	TEC1	cer	YPD_to_Low_N	TP3	960	low N	TEC1.YPD_to_Low_N.960	C1	H1	D2	GS3	ATCTGTC	8
HAP5_TP3_cer_C3_E2_C6_GS8	HAP5	cer	YPD_to_Low_N	TP3	960	low N	HAP5.YPD_to_Low_N.960	C3	E2	C6	GS8	TCGAAGG	61
WT_TP2_cer_C1_G6_G12_GS1	WT	cer	YPD_to_Low_N	TP2	60	low N	WT.YPD_to_Low_N.60	C1	G6	G12	GS1	TACGTAC	95
DAL80_TP3_cer_C3_C2_E5_GS8	DAL80	cer	YPD_to_Low_N	TP3	960	low N	DAL80.YPD_to_Low_N.960	C3	C2	E5	GS8	TTGCCAG	59
URE2_TP3_hyb_H2_E4_G7_GS4	URE2	hyb	YPD_to_Low_N	TP3	960	low N	URE2.YPD_to_Low_N.960	H2	E4	G7	GS4	TCTCGAA	77
MET28_TP2_par_P5_A5_D12_GS13	MET28	par	YPD_to_Low_N	TP2	60	low N	MET28.YPD_to_Low_N.60	P5	A5	D12	GS13	GCTTCAT	81
GLN3_TP1_hyb_remnants_E6_C11_GS9b	GLN3	hyb	YPD_to_Low_N	TP1	0	YPD	GLN3.YPD_to_Low_N.0	remnants	E6	C11	GS9b	CGTCAGA	92
STB5_TP3_par_P4C2_G2_B3_GS10	STB5	par	YPD_to_Low_N	TP3	960	low N	STB5.YPD_to_Low_N.960	P4C2	G2	B3	GS10	AGCTCAA	15
GCR2_TP3_par_remnants2_E5_G4_GS13	GCR2	par	YPD_to_Low_N	TP3	960	low N	GCR2.YPD_to_Low_N.960	remnants2	E5	G4	GS13	ACTGCAG	29
WT_TP2_par_P5_D6_G12_GS13	WT	par	YPD_to_Low_N	TP2	60	low N	WT.YPD_to_Low_N.60	P5	D6	G12	GS13	CGTCAGA	92
SWI4_TP2_par_P1_D1_E1_GS2	SWI4	par	YPD_to_Low_N	TP2	60	low N	SWI4.YPD_to_Low_N.60	P1	D1	E1	GS2	CTGTGAG	34
WT_TP1_par_P5_E5_G12_GS13	WT	par	YPD_to_Low_N	TP1	0	YPD	WT.YPD_to_Low_N.0	P5	E5	G12	GS13	ATGCCAA	37
NRG1_TP2_hyb_H2_G5_E10_GS4	NRG1	hyb	YPD_to_Low_N	TP2	60	low N	NRG1.YPD_to_Low_N.60	H2	G5	E10	GS4	CTAAGCG	39
SOK2_TP2_cer_C1_F4_A8_GS1	SOK2	cer	YPD_to_Low_N	TP2	60	low N	SOK2.YPD_to_Low_N.60	C1	F4	A8	GS1	ACGCTAT	78
STB5_TP1_cer_P4C2_C4_B9_GS9a	STB5	cer	YPD_to_Low_N	TP1	0	YPD	STB5.YPD_to_Low_N.0	P4C2	C4	B9	GS9a	GCTGAAT	27
RTG1_TP1_cer_P4C2_E5_E12_GS9a	RTG1	cer	YPD_to_Low_N	TP1	0	YPD	RTG1.YPD_to_Low_N.0	P4C2	E5	E12	GS9a	CTTGCAG	36
HAP5_TP2_par_P4C2_F3_C6_GS9b	HAP5	par	YPD_to_Low_N	TP2	60	low N	HAP5.YPD_to_Low_N.60	P4C2	F3	C6	GS9b	GCTTAGA	70
URE2_TP2_cer_C1_D4_G7_GS1	URE2	cer	YPD_to_Low_N	TP2	60	low N	URE2.YPD_to_Low_N.60	C1	D4	G7	GS1	CGGATTA	76
GCR2_TP1_par_remnants2_E5_G4_GS7	GCR2	par	YPD_to_Low_N	TP1	0	YPD	GCR2.YPD_to_Low_N.0	remnants2	E5	G4	GS7	GCCTACA	32
BAS1_TP2_cer_slow_B1_G3_GS11	BAS1	cer	YPD_to_Low_N	TP2	60	low N	BAS1.YPD_to_Low_N.60	slow	B1	G3	GS11	ACTCAGG	2
MBP1_TP3_cer_C1_B4_C7_GS3	MBP1	cer	YPD_to_Low_N	TP3	960	low N	MBP1.YPD_to_Low_N.960	C1	B4	C7	GS3	GGCGATT	26
HAP2_TP2_par_P2_A6_H11_GS5	HAP2	par	YPD_to_Low_N	TP2	60	low N	HAP2.YPD_to_Low_N.60	P2	A6	H11	GS5	CTACAGC	56
WT_TP2_hyb_H3_C5_G12_GS12	WT	hyb	YPD_to_Low_N	TP2	60	low N	WT.YPD_to_Low_N.60	H3	C5	G12	GS12	CTTAGTG	57
MBP1_TP2_cer_C1_B1_C1_GS1	MBP1	cer	YPD_to_Low_N	TP2	60	low N	MBP1.YPD_to_Low_N.60	C1	B1	C1	GS1	TACTAGC	50
TEC1_TP2_hyb_H2_A5_D8_GS4	TEC1	hyb	YPD_to_Low_N	TP2	60	low N	TEC1.YPD_to_Low_N.60	H2	A5	D8	GS4	TTCAAGC	33
RPN4_TP3_hyb_remnants_G6_G11_GS11	RPN4	hyb	YPD_to_Low_N	TP3	960	low N	RPN4.YPD_to_Low_N.960	remnants	G6	G11	GS11	GGCACTT	82
AFT1_TP3_hyb_P3H1_C6_H10_GS7	AFT1	hyb	YPD_to_Low_N	TP3	960	low N	AFT1.YPD_to_Low_N.960	P3H1	C6	H10	GS7	GTGCTAT	43
MSN2_TP3_cer_C1_B2_F2_GS3	MSN2	cer	YPD_to_Low_N	TP3	960	low N	MSN2.YPD_to_Low_N.960	C1	B2	F2	GS3	ATCTGCA	10
ARG80_TP1_cer_C3_H1_E3_GS7	ARG80	cer	YPD_to_Low_N	TP1	0	YPD	ARG80.YPD_to_Low_N.0	C3	H1	E3	GS7	CTACAGC	56
RIM101_TP2_hyb_H2_D2_H2_GS4	RIM101	hyb	YPD_to_Low_N	TP2	60	low N	RIM101.YPD_to_Low_N.60	H2	D2	H2	GS4	CAGTACG	12
WT_TP1_cer_C3_H2_G6_GS7	WT	cer	YPD_to_Low_N	TP1	0	YPD	WT.YPD_to_Low_N.0	C3	H2	G6	GS7	TCACAAG	64
TEC1_TP1_par_P5_A1_D2_GS13	TEC1	par	YPD_to_Low_N	TP1	0	YPD	TEC1.YPD_to_Low_N.0	P5	A1	D2	GS13	CTATTCG	1
INO4_TP3_cer_C1_G5_B11_GS3	INO4	cer	YPD_to_Low_N	TP3	960	low N	INO4.YPD_to_Low_N.960	C1	G5	B11	GS3	CTAAGCG	39
HAP1_TP3_cer_C1_A5_E8_GS3	HAP1	cer	YPD_to_Low_N	TP3	960	low N	HAP1.YPD_to_Low_N.960	C1	A5	E8	GS3	TTCAAGC	33
ARG80_TP2_cer_C3_H1_E3_GS8	ARG80	cer	YPD_to_Low_N	TP2	60	low N	ARG80.YPD_to_Low_N.60	C3	H1	E3	GS8	ATCTGTC	8
AFT1_TP2_hyb_P3H1_C3_H4_GS6	AFT1	hyb	YPD_to_Low_N	TP2	60	low N	AFT1.YPD_to_Low_N.60	P3H1	C3	H4	GS6	TTGCAGA	67
YAP1_TP2_par_P2_A5_C9_GS5	YAP1	par	YPD_to_Low_N	TP2	60	low N	YAP1.YPD_to_Low_N.60	P2	A5	C9	GS5	CTACAAG	48
WT_TP2_par_P5_F5_G12_GS13	WT	par	YPD_to_Low_N	TP2	60	low N	WT.YPD_to_Low_N.60	P5	F5	G12	GS13	CCTGACT	86
LEU3_TP3_hyb_H2_F5_B10_GS4	LEU3	hyb	YPD_to_Low_N	TP3	960	low N	LEU3.YPD_to_Low_N.960	H2	F5	B10	GS4	CCTGACT	86
RGT1_TP1_hyb_H2_H2_F4_GS3	RGT1	hyb	YPD_to_Low_N	TP1	0	YPD	RGT1.YPD_to_Low_N.0	H2	H2	F4	GS3	TCACAAG	64
PHO4_TP1_par_P1_H5_F11_GS2	PHO4	par	YPD_to_Low_N	TP1	0	YPD	PHO4.YPD_to_Low_N.0	P1	H5	F11	GS2	TAGCGCA	24
SUM1_TP3_hyb_H2_H4_C8_GS4	SUM1	hyb	YPD_to_Low_N	TP3	960	low N	SUM1.YPD_to_Low_N.960	H2	H4	C8	GS4	TGACGGA	80
ZAP1_TP3_cer_C3_G1_D3_GS8	ZAP1	cer	YPD_to_Low_N	TP3	960	low N	ZAP1.YPD_to_Low_N.960	C3	G1	D3	GS8	AAGCCTT	55
STB5_TP2_hyb_slow_F2_B3_GS11	STB5	hyb	YPD_to_Low_N	TP2	60	low N	STB5.YPD_to_Low_N.60	slow	F2	B3	GS11	CGTAACT	14
WT_TP1_cer_C1_E6_G12_GS1	WT	cer	YPD_to_Low_N	TP1	0	YPD	WT.YPD_to_Low_N.0	C1	E6	G12	GS1	CTACGTA	45
RTG1_TP3_par_P2_C6_E12_GS5	RTG1	par	YPD_to_Low_N	TP3	960	low N	RTG1.YPD_to_Low_N.960	P2	C6	E12	GS5	CACAGAT	90
MBP1_TP1_hyb_H2_C1_C1_GS3	MBP1	hyb	YPD_to_Low_N	TP1	0	YPD	MBP1.YPD_to_Low_N.0	H2	C1	C1	GS3	GCAACTA	51
GZF3_TP2_par_P4C2_C3_D5_GS9b	GZF3	par	YPD_to_Low_N	TP2	60	low N	GZF3.YPD_to_Low_N.60	P4C2	C3	D5	GS9b	TTGCAGA	67
GCR2_TP2_cer_P4C2_A5_G10_GS9b	GCR2	cer	YPD_to_Low_N	TP2	60	low N	GCR2.YPD_to_Low_N.60	P4C2	A5	G10	GS9b	GCTTCAT	81
GLN3_TP1_par_slow_H1_C5_GS10	GLN3	par	YPD_to_Low_N	TP1	0	YPD	GLN3.YPD_to_Low_N.0	slow	H1	C5	GS10	CTACAGC	56
RFX1_TP3_cer_C3_F4_G8_GS8	RFX1	cer	YPD_to_Low_N	TP3	960	low N	RFX1.YPD_to_Low_N.960	C3	F4	G8	GS8	ACGCTAT	78
PHO4_TP3_cer_C1_A3_F5_GS3	PHO4	cer	YPD_to_Low_N	TP3	960	low N	PHO4.YPD_to_Low_N.960	C1	A3	F5	GS3	TGTCACG	17
ARG80_TP2_hyb_P3H1_H2_E3_GS6	ARG80	hyb	YPD_to_Low_N	TP2	60	low N	ARG80.YPD_to_Low_N.60	P3H1	H2	E3	GS6	TCACAAG	64
HAP3_TP2_cer_H3_G3_A6_GS12	HAP3	cer	YPD_to_Low_N	TP2	60	low N	HAP3.YPD_to_Low_N.60	H3	G3	A6	GS12	AAGCCTT	55
RFX1_TP1_hyb_H2_C2_G2_GS3	RFX1	hyb	YPD_to_Low_N	TP1	0	YPD	RFX1.YPD_to_Low_N.0	H2	C2	G2	GS3	TTGCCAG	59
GZF3_TP3_par_P4C2_C3_D5_GS10	GZF3	par	YPD_to_Low_N	TP3	960	low N	GZF3.YPD_to_Low_N.960	P4C2	C3	D5	GS10	GGATCTA	19
CBF1_TP2_hyb_slow_H2_H3_GS11	CBF1	hyb	YPD_to_Low_N	TP2	60	low N	CBF1.YPD_to_Low_N.60	slow	H2	H3	GS11	ATAACCG	16
MIG1_TP2_hyb_P3H1_B3_D4_GS6	MIG1	hyb	YPD_to_Low_N	TP2	60	low N	MIG1.YPD_to_Low_N.60	P3H1	B3	D4	GS6	CAATCGA	66
WT_TP1_par_P5_G6_G12_GS13	WT	par	YPD_to_Low_N	TP1	0	YPD	WT.YPD_to_Low_N.0	P5	G6	G12	GS13	GTAGTCT	47
HAP4_TP3_hyb_H2_C3_B6_GS4	HAP4	hyb	YPD_to_Low_N	TP3	960	low N	HAP4.YPD_to_Low_N.960	H2	C3	B6	GS4	TTGCAGA	67
WT_TP3_par_remnants2_B5_G6_GS13	WT	par	YPD_to_Low_N	TP3	960	low N	WT.YPD_to_Low_N.960	remnants2	B5	G6	GS13	CTACAAG	48
MSN2_TP1_par_P2_G4_F8_GS5	MSN2	par	YPD_to_Low_N	TP1	0	YPD	MSN2.YPD_to_Low_N.0	P2	G4	F8	GS5	CGTAACT	14
MET28_TP2_cer_C1_C3_D6_GS1	MET28	cer	YPD_to_Low_N	TP2	60	low N	MET28.YPD_to_Low_N.60	C1	C3	D6	GS1	TTGCAGA	67
HAP4_TP1_hyb_H2_C3_B6_GS3	HAP4	hyb	YPD_to_Low_N	TP1	0	YPD	HAP4.YPD_to_Low_N.0	H2	C3	B6	GS3	TTGCAGA	67
NRG1_TP3_par_P1_E2_E4_GS2	NRG1	par	YPD_to_Low_N	TP3	960	low N	NRG1.YPD_to_Low_N.960	P1	E2	E4	GS2	AACGGTG	72
ZAP1_TP3_par_slow_C5_D9_GS11	ZAP1	par	YPD_to_Low_N	TP3	960	low N	ZAP1.YPD_to_Low_N.960	slow	C5	D9	GS11	CGAGTCT	83
MET28_TP1_par_P4C2_G3_D6_GS9a	MET28	par	YPD_to_Low_N	TP1	0	YPD	MET28.YPD_to_Low_N.0	P4C2	G3	D6	GS9a	ACTTGGC	23
SUM1_TP3_hyb_H2_H1_C2_GS4	SUM1	hyb	YPD_to_Low_N	TP3	960	low N	SUM1.YPD_to_Low_N.960	H2	H1	C2	GS4	CTACAGC	56
WT_TP3_par_P5_G3_G6_GS14	WT	par	YPD_to_Low_N	TP3	960	low N	WT.YPD_to_Low_N.960	P5	G3	G6	GS14	ACTTGGC	23
HAP4_TP2_cer_C3_D5_B12_GS8	HAP4	cer	YPD_to_Low_N	TP2	60	low N	HAP4.YPD_to_Low_N.60	C3	D5	B12	GS8	CTTGCAG	36
ARG81_TP1_cer_C1_E5_F9_GS1	ARG81	cer	YPD_to_Low_N	TP1	0	YPD	ARG81.YPD_to_Low_N.0	C1	E5	F9	GS1	ATGCCAA	37
ACE2_TP3_hyb_H2_A4_A7_GS4	ACE2	hyb	YPD_to_Low_N	TP3	960	low N	ACE2.YPD_to_Low_N.960	H2	A4	A7	GS4	AGTCTCC	73
RFX1_TP3_cer_C3_F1_G2_GS8	RFX1	cer	YPD_to_Low_N	TP3	960	low N	RFX1.YPD_to_Low_N.960	C3	F1	G2	GS8	AAGGTAC	54
SOK2_TP3_hyb_P3H1_C2_A2_GS7	SOK2	hyb	YPD_to_Low_N	TP3	960	low N	SOK2.YPD_to_Low_N.960	P3H1	C2	A2	GS7	GCAGTAG	11
WT_TP3_par_P5_H5_G12_GS14	WT	par	YPD_to_Low_N	TP3	960	low N	WT.YPD_to_Low_N.960	P5	H5	G12	GS14	AGCCGAT	40
MSN2_TP1_par_P2_G1_F2_GS5	MSN2	par	YPD_to_Low_N	TP1	0	YPD	MSN2.YPD_to_Low_N.0	P2	G1	F2	GS5	ACACGTG	3
GCR2_TP2_hyb_slow_A3_G4_GS11	GCR2	hyb	YPD_to_Low_N	TP2	60	low N	GCR2.YPD_to_Low_N.60	slow	A3	G4	GS11	TGTCACG	17
ROX1_TP2_hyb_P3H1_E5_A9_GS6	ROX1	hyb	YPD_to_Low_N	TP2	60	low N	ROX1.YPD_to_Low_N.60	P3H1	E5	A9	GS6	TGCCTAA	85
WT_TP3_par_P5_B6_G12_GS14	WT	par	YPD_to_Low_N	TP3	960	low N	WT.YPD_to_Low_N.960	P5	B6	G12	GS14	GATCACA	42
SOK2_TP1_hyb_P3H1_C5_A8_GS6	SOK2	hyb	YPD_to_Low_N	TP1	0	YPD	SOK2.YPD_to_Low_N.0	P3H1	C5	A8	GS6	CTAGTGC	35
WT_TP3_hyb_H3_D5_G12_GS12	WT	hyb	YPD_to_Low_N	TP3	960	low N	WT.YPD_to_Low_N.960	H3	D5	G12	GS12	CACAGAT	90
HAP1_TP2_hyb_P3H1_D2_E2_GS6	HAP1	hyb	YPD_to_Low_N	TP2	60	low N	HAP1.YPD_to_Low_N.60	P3H1	D2	E2	GS6	CGTTGAA	60
RIM101_TP1_par_P1_H1_H2_GS2	RIM101	par	YPD_to_Low_N	TP1	0	YPD	RIM101.YPD_to_Low_N.0	P1	H1	H2	GS2	AGCACTG	5
CBF1_TP1_par_remnants2_H3_H9_GS7	CBF1	par	YPD_to_Low_N	TP1	0	YPD	CBF1.YPD_to_Low_N.0	remnants2	H3	H9	GS7	AGGCGTT	52
GCR2_TP3_cer_P4C2_A5_G10_GS10	GCR2	cer	YPD_to_Low_N	TP3	960	low N	GCR2.YPD_to_Low_N.960	P4C2	A5	G10	GS10	TTCAAGC	33
FKH1_TP1_par_P1_B1_B1_GS2	FKH1	par	YPD_to_Low_N	TP1	0	YPD	FKH1.YPD_to_Low_N.0	P1	B1	B1	GS2	CTATTCG	1
GLN3_TP1_par_P4C2_B3_C5_GS9a	GLN3	par	YPD_to_Low_N	TP1	0	YPD	GLN3.YPD_to_Low_N.0	P4C2	B3	C5	GS9a	TTCCTGA	18
RTG3_TP3_par_remnants_B4_F12_GS11	RTG3	par	YPD_to_Low_N	TP3	960	low N	RTG3.YPD_to_Low_N.960	remnants	B4	F12	GS11	ATAGCGA	46
SUM1_TP1_hyb_H2_H1_C2_GS3	SUM1	hyb	YPD_to_Low_N	TP1	0	YPD	SUM1.YPD_to_Low_N.0	H2	H1	C2	GS3	CTACAGC	56
GCR2_TP2_par_remnants2_F4_G10_GS8	GCR2	par	YPD_to_Low_N	TP2	60	low N	GCR2.YPD_to_Low_N.60	remnants2	F4	G10	GS8	AGTCTCC	73
CHA4_TP3_par_P2_F6_C10_GS5	CHA4	par	YPD_to_Low_N	TP3	960	low N	CHA4.YPD_to_Low_N.960	P2	F6	C10	GS5	CGTCAGA	92
ARG81_TP1_par_P3H1_H1_F3_GS6	ARG81	par	YPD_to_Low_N	TP1	0	YPD	ARG81.YPD_to_Low_N.0	P3H1	H1	F3	GS6	ATCTGTC	8
SOK2_TP1_par_P3H1_D1_A2_GS6	SOK2	par	YPD_to_Low_N	TP1	0	YPD	SOK2.YPD_to_Low_N.0	P3H1	D1	A2	GS6	TCTTCGA	4
PHD1_TP3_par_P3H1_C1_H1_GS7	PHD1	par	YPD_to_Low_N	TP3	960	low N	PHD1.YPD_to_Low_N.960	P3H1	C1	H1	GS7	ACACGTG	3
MIG1_TP2_par_P1_D2_D4_GS2	MIG1	par	YPD_to_Low_N	TP2	60	low N	MIG1.YPD_to_Low_N.60	P1	D2	D4	GS2	CTAAGCG	39
MBP1_TP2_hyb_H2_C4_C7_GS4	MBP1	hyb	YPD_to_Low_N	TP2	60	low N	MBP1.YPD_to_Low_N.60	H2	C4	C7	GS4	GCTGAAT	27
HAP5_TP1_par_P5_H4_C12_GS13	HAP5	par	YPD_to_Low_N	TP1	0	YPD	HAP5.YPD_to_Low_N.0	P5	H4	C12	GS13	GCCTACA	32
PHO4_TP2_hyb_slow_B6_F11_GS11	PHO4	hyb	YPD_to_Low_N	TP2	60	low N	PHO4.YPD_to_Low_N.60	slow	B6	F11	GS11	GATCACA	42
GCN4_TP1_par_P1_C2_A4_GS2	GCN4	par	YPD_to_Low_N	TP1	0	YPD	GCN4.YPD_to_Low_N.0	P1	C2	A4	GS2	AGTGCGT	6
HAP2_TP3_cer_slow_D1_H5_GS11	HAP2	cer	YPD_to_Low_N	TP3	960	low N	HAP2.YPD_to_Low_N.960	slow	D1	H5	GS11	AGGCGTT	52
STB5_TP1_par_P4C2_G5_B9_GS9a	STB5	par	YPD_to_Low_N	TP1	0	YPD	STB5.YPD_to_Low_N.0	P4C2	G5	B9	GS9a	CATGCTG	38
GCR2_TP2_hyb_slow_A6_G10_GS11	GCR2	hyb	YPD_to_Low_N	TP2	60	low N	GCR2.YPD_to_Low_N.60	slow	A6	G10	GS11	CGCTTGA	41
YAP1_TP3_cer_P4C2_D4_C9_GS10	YAP1	cer	YPD_to_Low_N	TP3	960	low N	YAP1.YPD_to_Low_N.960	P4C2	D4	C9	GS10	GAATAGC	28
MET28_TP2_hyb_H3_H1_D6_GS12	MET28	hyb	YPD_to_Low_N	TP2	60	low N	MET28.YPD_to_Low_N.60	H3	H1	D6	GS12	AGCCGAT	40
RTG3_TP1_par_remnants_B4_F12_GS9b	RTG3	par	YPD_to_Low_N	TP1	0	YPD	RTG3.YPD_to_Low_N.0	remnants	B4	F12	GS9b	TCACAAG	64
HAP2_TP3_cer_slow_D4_H11_GS11	HAP2	cer	YPD_to_Low_N	TP3	960	low N	HAP2.YPD_to_Low_N.960	slow	D4	H11	GS11	CGGATTA	76
BAS1_TP2_cer_P4C2_E1_G3_GS9b	BAS1	cer	YPD_to_Low_N	TP2	60	low N	BAS1.YPD_to_Low_N.60	P4C2	E1	G3	GS9b	CGCTACA	53
MBP1_TP3_par_P1_C4_C7_GS2	MBP1	par	YPD_to_Low_N	TP3	960	low N	MBP1.YPD_to_Low_N.960	P1	C4	C7	GS2	GCTTCAT	81
GCR2_TP2_par_remnants2_C5_G4_GS8	GCR2	par	YPD_to_Low_N	TP2	60	low N	GCR2.YPD_to_Low_N.60	remnants2	C5	G4	GS8	GGCGATT	26
GZF3_TP2_hyb_H2_A6_D11_GS4	GZF3	hyb	YPD_to_Low_N	TP2	60	low N	GZF3.YPD_to_Low_N.60	H2	A6	D11	GS4	CGCTTGA	41
WT_TP2_cer_C1_F3_G6_GS1	WT	cer	YPD_to_Low_N	TP2	60	low N	WT.YPD_to_Low_N.60	C1	F3	G6	GS1	GCTTAGA	70
TEC1_TP3_par_P5_A4_D8_GS14	TEC1	par	YPD_to_Low_N	TP3	960	low N	TEC1.YPD_to_Low_N.960	P5	A4	D8	GS14	CCTAAGG	25
HAP2_TP1_hyb_H3_E1_H5_GS12	HAP2	hyb	YPD_to_Low_N	TP1	0	YPD	HAP2.YPD_to_Low_N.0	H3	E1	H5	GS12	AGCACTG	5
WT_TP2_cer_C3_G5_G12_GS8	WT	cer	YPD_to_Low_N	TP2	60	low N	WT.YPD_to_Low_N.60	C3	G5	G12	GS8	CTAAGCG	39
WT_TP3_cer_C3_G2_G6_GS8	WT	cer	YPD_to_Low_N	TP3	960	low N	WT.YPD_to_Low_N.960	C3	G2	G6	GS8	AACAGCT	63
SUM1_TP3_par_P4C2_F2_C2_GS10	SUM1	par	YPD_to_Low_N	TP3	960	low N	SUM1.YPD_to_Low_N.960	P4C2	F2	C2	GS10	CGTAACT	14
RTG3_TP2_cer_C1_D6_F12_GS1	RTG3	cer	YPD_to_Low_N	TP2	60	low N	RTG3.YPD_to_Low_N.60	C1	D6	F12	GS1	CGTCAGA	92
CBF1_TP1_cer_slow_C4_H9_GS10	CBF1	cer	YPD_to_Low_N	TP1	0	YPD	CBF1.YPD_to_Low_N.0	slow	C4	H9	GS10	ATCAGGC	75
RPN4_TP2_hyb_remnants_G3_G11_GS10	RPN4	hyb	YPD_to_Low_N	TP2	60	low N	RPN4.YPD_to_Low_N.60	remnants	G3	G11	GS10	GTAGTCT	47
PHD1_TP1_par_P3H1_C4_H7_GS6	PHD1	par	YPD_to_Low_N	TP1	0	YPD	PHD1.YPD_to_Low_N.0	P3H1	C4	H7	GS6	GCTGAAT	27
CHA4_TP3_par_P2_F3_C4_GS5	CHA4	par	YPD_to_Low_N	TP3	960	low N	CHA4.YPD_to_Low_N.960	P2	F3	C4	GS5	GACACTG	74
WT_TP3_par_P5_E3_G6_GS14	WT	par	YPD_to_Low_N	TP3	960	low N	WT.YPD_to_Low_N.960	P5	E3	G6	GS14	GGAGACT	21
MBP1_TP2_par_P1_C4_C7_GS2	MBP1	par	YPD_to_Low_N	TP2	60	low N	MBP1.YPD_to_Low_N.60	P1	C4	C7	GS2	CATGAAC	49
ARG81_TP2_hyb_H2_E2_F3_GS4	ARG81	hyb	YPD_to_Low_N	TP2	60	low N	ARG81.YPD_to_Low_N.60	H2	E2	F3	GS4	TGCACAA	13
ARG80_TP1_hyb_P3H1_H5_E9_GS6	ARG80	hyb	YPD_to_Low_N	TP1	0	YPD	ARG80.YPD_to_Low_N.0	P3H1	H5	E9	GS6	AGCCGAT	40
WT_TP1_hyb_H3_C5_G12_GS12	WT	hyb	YPD_to_Low_N	TP1	0	YPD	WT.YPD_to_Low_N.0	H3	C5	G12	GS12	CCTAAGG	25
HAP3_TP1_hyb_P3H1_F6_A12_GS6	HAP3	hyb	YPD_to_Low_N	TP1	0	YPD	HAP3.YPD_to_Low_N.0	P3H1	F6	A12	GS6	ATAGCGA	46
RTG1_TP2_cer_P4C2_E5_E12_GS9b	RTG1	cer	YPD_to_Low_N	TP2	60	low N	RTG1.YPD_to_Low_N.60	P4C2	E5	E12	GS9b	CAGTCAA	84
MBP1_TP1_cer_C1_B1_C1_GS1	MBP1	cer	YPD_to_Low_N	TP1	0	YPD	MBP1.YPD_to_Low_N.0	C1	B1	C1	GS1	ACTCAGG	2
GZF3_TP2_hyb_H2_A3_D5_GS4	GZF3	hyb	YPD_to_Low_N	TP2	60	low N	GZF3.YPD_to_Low_N.60	H2	A3	D5	GS4	TGTCACG	17
WT_TP3_cer_C3_D3_G6_GS8	WT	cer	YPD_to_Low_N	TP3	960	low N	WT.YPD_to_Low_N.960	C3	D3	G6	GS8	ACCGATC	68
WT_TP2_par_remnants2_F5_G6_GS8	WT	par	YPD_to_Low_N	TP2	60	low N	WT.YPD_to_Low_N.60	remnants2	F5	G6	GS8	TACCGGA	96
HAP2_TP2_cer_slow_D1_H5_GS11	HAP2	cer	YPD_to_Low_N	TP2	60	low N	HAP2.YPD_to_Low_N.60	slow	D1	H5	GS11	TCTTCGA	4
AFT1_TP2_hyb_P3H1_C6_H10_GS6	AFT1	hyb	YPD_to_Low_N	TP2	60	low N	AFT1.YPD_to_Low_N.60	P3H1	C6	H10	GS6	CTTCGAA	91
HAP3_TP1_hyb_P3H1_F3_A6_GS6	HAP3	hyb	YPD_to_Low_N	TP1	0	YPD	HAP3.YPD_to_Low_N.0	P3H1	F3	A6	GS6	AGCTAGT	22
MBP1_TP3_hyb_H2_C4_C7_GS4	MBP1	hyb	YPD_to_Low_N	TP3	960	low N	MBP1.YPD_to_Low_N.960	H2	C4	C7	GS4	ATCAGGC	75
ARG80_TP1_cer_C3_H4_E9_GS7	ARG80	cer	YPD_to_Low_N	TP1	0	YPD	ARG80.YPD_to_Low_N.0	C3	H4	E9	GS7	TGACGGA	80
INO4_TP3_par_P4C2_A6_B11_GS10	INO4	par	YPD_to_Low_N	TP3	960	low N	INO4.YPD_to_Low_N.960	P4C2	A6	B11	GS10	CGCTTGA	41
PHD1_TP1_par_P3H1_C1_H1_GS6	PHD1	par	YPD_to_Low_N	TP1	0	YPD	PHD1.YPD_to_Low_N.0	P3H1	C1	H1	GS6	ACACGTG	3
WT_TP1_par_P5_G5_G12_GS13	WT	par	YPD_to_Low_N	TP1	0	YPD	WT.YPD_to_Low_N.0	P5	G5	G12	GS13	CTAAGCG	39
MET28_TP1_cer_remnants_H4_D12_GS9b	MET28	cer	YPD_to_Low_N	TP1	0	YPD	MET28.YPD_to_Low_N.0	remnants	H4	D12	GS9b	TCTCGAA	77
LEU3_TP3_par_remnants_B5_B4_GS11	LEU3	par	YPD_to_Low_N	TP3	960	low N	LEU3.YPD_to_Low_N.960	remnants	B5	B4	GS11	TACGAGG	71
STB5_TP1_hyb_slow_F2_B3_GS10	STB5	hyb	YPD_to_Low_N	TP1	0	YPD	STB5.YPD_to_Low_N.0	slow	F2	B3	GS10	TATAGGC	62
FKH1_TP2_cer_C1_A4_B7_GS1	FKH1	cer	YPD_to_Low_N	TP2	60	low N	FKH1.YPD_to_Low_N.60	C1	A4	B7	GS1	AGTCTCC	73
GCN4_TP1_par_P2_C5_A10_GS5	GCN4	par	YPD_to_Low_N	TP1	0	YPD	GCN4.YPD_to_Low_N.0	P2	C5	A10	GS5	TTCCTGA	18
FKH1_TP2_par_P2_B4_B7_GS5	FKH1	par	YPD_to_Low_N	TP2	60	low N	FKH1.YPD_to_Low_N.60	P2	B4	B7	GS5	GTGCTAT	43
WT_TP2_par_P1_E3_G6_GS2	WT	par	YPD_to_Low_N	TP2	60	low N	WT.YPD_to_Low_N.60	P1	E3	G6	GS2	GTAGTCT	47
INO4_TP2_par_P4C2_A6_B11_GS9b	INO4	par	YPD_to_Low_N	TP2	60	low N	INO4.YPD_to_Low_N.60	P4C2	A6	B11	GS9b	CCTGATG	89
MSN2_TP1_hyb_H2_B5_F8_GS3	MSN2	hyb	YPD_to_Low_N	TP1	0	YPD	MSN2.YPD_to_Low_N.0	H2	B5	F8	GS3	GGCACTT	82
WT_TP3_par_P5_C3_G6_GS14	WT	par	YPD_to_Low_N	TP3	960	low N	WT.YPD_to_Low_N.960	P5	C3	G6	GS14	GGATCTA	19
WT_TP1_cer_C1_F6_G12_GS1	WT	cer	YPD_to_Low_N	TP1	0	YPD	WT.YPD_to_Low_N.0	C1	F6	G12	GS1	ATAGCGA	46
RIM101_TP1_cer_C1_C2_H2_GS1	RIM101	cer	YPD_to_Low_N	TP1	0	YPD	RIM101.YPD_to_Low_N.0	C1	C2	H2	GS1	GCAGTAG	11
HAP5_TP3_par_P5_H1_C12_GS14	HAP5	par	YPD_to_Low_N	TP3	960	low N	HAP5.YPD_to_Low_N.960	P5	H1	C12	GS14	ATCTGTC	8
WT_TP2_hyb_H3_B6_G12_GS12	WT	hyb	YPD_to_Low_N	TP2	60	low N	WT.YPD_to_Low_N.60	H3	B6	G12	GS12	TTGCCAG	59
WT_TP1_par_remnants2_D5_G6_GS7	WT	par	YPD_to_Low_N	TP1	0	YPD	WT.YPD_to_Low_N.0	remnants2	D5	G6	GS7	GACACTG	74
WT_TP3_cer_C3_H5_G12_GS8	WT	cer	YPD_to_Low_N	TP3	960	low N	WT.YPD_to_Low_N.960	C3	H5	G12	GS8	AACTCGT	88
ACE2_TP2_hyb_H2_A1_A1_GS4	ACE2	hyb	YPD_to_Low_N	TP2	60	low N	ACE2.YPD_to_Low_N.60	H2	A1	A1	GS4	CTATTCG	1
AFT1_TP2_par_P3H1_A5_H10_GS6	AFT1	par	YPD_to_Low_N	TP2	60	low N	AFT1.YPD_to_Low_N.60	P3H1	A5	H10	GS6	GCTTCAT	81
CBF1_TP3_par_remnants2_H3_H9_GS13	CBF1	par	YPD_to_Low_N	TP3	960	low N	CBF1.YPD_to_Low_N.960	remnants2	H3	H9	GS13	CGCTTGA	41
WT_TP2_par_P5_D3_G6_GS13	WT	par	YPD_to_Low_N	TP2	60	low N	WT.YPD_to_Low_N.60	P5	D3	G6	GS13	ACCGATC	68
RTG1_TP3_par_P1_C3_E6_GS2	RTG1	par	YPD_to_Low_N	TP3	960	low N	RTG1.YPD_to_Low_N.960	P1	C3	E6	GS2	TCTCGAA	77
HAP3_TP2_hyb_P3H1_F3_A6_GS6	HAP3	hyb	YPD_to_Low_N	TP2	60	low N	HAP3.YPD_to_Low_N.60	P3H1	F3	A6	GS6	GCTTAGA	70
SOK2_TP2_cer_C1_F1_A2_GS1	SOK2	cer	YPD_to_Low_N	TP2	60	low N	SOK2.YPD_to_Low_N.60	C1	F1	A2	GS1	AAGGTAC	54
HAP1_TP3_hyb_P3H1_D2_E2_GS7	HAP1	hyb	YPD_to_Low_N	TP3	960	low N	HAP1.YPD_to_Low_N.960	P3H1	D2	E2	GS7	CAGTACG	12
PHD1_TP3_par_P3H1_C4_H7_GS7	PHD1	par	YPD_to_Low_N	TP3	960	low N	PHD1.YPD_to_Low_N.960	P3H1	C4	H7	GS7	GCTGAAT	27
RTG1_TP1_par_P2_C6_E12_GS5	RTG1	par	YPD_to_Low_N	TP1	0	YPD	RTG1.YPD_to_Low_N.0	P2	C6	E12	GS5	GGCGATT	26
CBF1_TP3_par_slow_F3_H3_GS11	CBF1	par	YPD_to_Low_N	TP3	960	low N	CBF1.YPD_to_Low_N.960	slow	F3	H3	GS11	GCTTAGA	70
WT_TP1_par_P5_F5_G12_GS13	WT	par	YPD_to_Low_N	TP1	0	YPD	WT.YPD_to_Low_N.0	P5	F5	G12	GS13	CATGCTG	38
CBF1_TP3_cer_slow_C4_H9_GS11	CBF1	cer	YPD_to_Low_N	TP3	960	low N	CBF1.YPD_to_Low_N.960	slow	C4	H9	GS11	ATCAGGC	75
PHO4_TP3_hyb_slow_B3_F5_GS11	PHO4	hyb	YPD_to_Low_N	TP3	960	low N	PHO4.YPD_to_Low_N.960	slow	B3	F5	GS11	CAATCGA	66
ZAP1_TP3_hyb_remnants_C4_D9_GS11	ZAP1	hyb	YPD_to_Low_N	TP3	960	low N	ZAP1.YPD_to_Low_N.960	remnants	C4	D9	GS11	GTAGTCT	47
NRG1_TP1_hyb_H2_G5_E10_GS3	NRG1	hyb	YPD_to_Low_N	TP1	0	YPD	NRG1.YPD_to_Low_N.0	H2	G5	E10	GS3	TCTGGAG	87
WT_TP1_par_P5_D3_G6_GS13	WT	par	YPD_to_Low_N	TP1	0	YPD	WT.YPD_to_Low_N.0	P5	D3	G6	GS13	TACCAGT	20
MET28_TP3_par_P5_A2_D12_GS14	MET28	par	YPD_to_Low_N	TP3	960	low N	MET28.YPD_to_Low_N.960	P5	A2	D12	GS14	GTATGCG	9
WT_TP1_par_P1_F6_G12_GS2	WT	par	YPD_to_Low_N	TP1	0	YPD	WT.YPD_to_Low_N.0	P1	F6	G12	GS2	GCTGAAT	27
HAP1_TP2_hyb_P3H1_D5_E8_GS6	HAP1	hyb	YPD_to_Low_N	TP2	60	low N	HAP1.YPD_to_Low_N.60	P3H1	D5	E8	GS6	CAGTCAA	84
GLN3_TP3_hyb_remnants_E3_C11_GS11	GLN3	hyb	YPD_to_Low_N	TP3	960	low N	GLN3.YPD_to_Low_N.960	remnants	E3	C11	GS11	GTGCTAT	43
GLN3_TP3_par_slow_H1_C5_GS11	GLN3	par	YPD_to_Low_N	TP3	960	low N	GLN3.YPD_to_Low_N.960	slow	H1	C5	GS11	CTACAGC	56
ACE2_TP3_par_P5_D2_A7_GS14	ACE2	par	YPD_to_Low_N	TP3	960	low N	ACE2.YPD_to_Low_N.960	P5	D2	A7	GS14	CAGTACG	12
MBP1_TP3_cer_C1_B1_C1_GS3	MBP1	cer	YPD_to_Low_N	TP3	960	low N	MBP1.YPD_to_Low_N.960	C1	B1	C1	GS3	ACTCAGG	2
HAP2_TP2_cer_slow_D4_H11_GS11	HAP2	cer	YPD_to_Low_N	TP2	60	low N	HAP2.YPD_to_Low_N.60	slow	D4	H11	GS11	GAATAGC	28
BAS1_TP1_cer_slow_B1_G3_GS10	BAS1	cer	YPD_to_Low_N	TP1	0	YPD	BAS1.YPD_to_Low_N.0	slow	B1	G3	GS10	TACTAGC	50
WT_TP3_par_P1_F6_G12_GS2	WT	par	YPD_to_Low_N	TP3	960	low N	WT.YPD_to_Low_N.960	P1	F6	G12	GS2	CTTCGAA	91
HAP2_TP1_cer_P4C2_D2_H5_GS9a	HAP2	cer	YPD_to_Low_N	TP1	0	YPD	HAP2.YPD_to_Low_N.0	P4C2	D2	H5	GS9a	CAGTACG	12
HAP1_TP1_hyb_P3H1_D2_E2_GS6	HAP1	hyb	YPD_to_Low_N	TP1	0	YPD	HAP1.YPD_to_Low_N.0	P3H1	D2	E2	GS6	CAGTACG	12
URE2_TP1_hyb_H2_E4_G7_GS3	URE2	hyb	YPD_to_Low_N	TP1	0	YPD	URE2.YPD_to_Low_N.0	H2	E4	G7	GS3	TCTCGAA	77
GZF3_TP2_cer_C1_H5_D11_GS1	GZF3	cer	YPD_to_Low_N	TP2	60	low N	GZF3.YPD_to_Low_N.60	C1	H5	D11	GS1	AACTCGT	88
AFT1_TP1_par_P3H1_A5_H10_GS6	AFT1	par	YPD_to_Low_N	TP1	0	YPD	AFT1.YPD_to_Low_N.0	P3H1	A5	H10	GS6	TTCAAGC	33
HAP5_TP2_par_slow_B2_C6_GS11	HAP5	par	YPD_to_Low_N	TP2	60	low N	HAP5.YPD_to_Low_N.60	slow	B2	C6	GS11	ATCTGCA	10
WT_TP2_cer_C3_C6_G12_GS8	WT	cer	YPD_to_Low_N	TP2	60	low N	WT.YPD_to_Low_N.60	C3	C6	G12	GS8	GTGCTAT	43
RTG1_TP2_par_P2_C6_E12_GS5	RTG1	par	YPD_to_Low_N	TP2	60	low N	RTG1.YPD_to_Low_N.60	P2	C6	E12	GS5	GGCTAGA	58
WT_TP3_cer_C3_A6_G12_GS8	WT	cer	YPD_to_Low_N	TP3	960	low N	WT.YPD_to_Low_N.960	C3	A6	G12	GS8	CCTGATG	89
HAP4_TP3_par_P4C2_E6_B12_GS10	HAP4	par	YPD_to_Low_N	TP3	960	low N	HAP4.YPD_to_Low_N.960	P4C2	E6	B12	GS10	CTACGTA	45
WT_TP2_cer_C1_G3_G6_GS1	WT	cer	YPD_to_Low_N	TP2	60	low N	WT.YPD_to_Low_N.60	C1	G3	G6	GS1	TACGAGG	71
RGT1_TP3_par_P2_F5_F10_GS5	RGT1	par	YPD_to_Low_N	TP3	960	low N	RGT1.YPD_to_Low_N.960	P2	F5	F10	GS5	TGCCTAA	85
WT_TP1_cer_C3_C3_G6_GS7	WT	cer	YPD_to_Low_N	TP1	0	YPD	WT.YPD_to_Low_N.0	C3	C3	G6	GS7	TTGCAGA	67
MSN2_TP2_hyb_H2_B5_F8_GS4	MSN2	hyb	YPD_to_Low_N	TP2	60	low N	MSN2.YPD_to_Low_N.60	H2	B5	F8	GS4	CTGTGAG	34
ZAP1_TP2_hyb_H3_A1_D3_GS12	ZAP1	hyb	YPD_to_Low_N	TP2	60	low N	ZAP1.YPD_to_Low_N.60	H3	A1	D3	GS12	TTCAAGC	33
MSN2_TP2_cer_C1_B2_F2_GS1	MSN2	cer	YPD_to_Low_N	TP2	60	low N	MSN2.YPD_to_Low_N.60	C1	B2	F2	GS1	GGCTAGA	58
MET28_TP1_cer_C1_C6_D12_GS1	MET28	cer	YPD_to_Low_N	TP1	0	YPD	MET28.YPD_to_Low_N.0	C1	C6	D12	GS1	GTGCTAT	43
HAP5_TP2_par_P5_H4_C12_GS13	HAP5	par	YPD_to_Low_N	TP2	60	low N	HAP5.YPD_to_Low_N.60	P5	H4	C12	GS13	TCGATAC	79
RFX1_TP2_cer_C3_F4_G8_GS8	RFX1	cer	YPD_to_Low_N	TP2	60	low N	RFX1.YPD_to_Low_N.60	C3	F4	G8	GS8	CTTACGG	30
ZAP1_TP1_cer_C3_G4_D9_GS7	ZAP1	cer	YPD_to_Low_N	TP1	0	YPD	ZAP1.YPD_to_Low_N.0	C3	G4	D9	GS7	TCGATAC	79
URE2_TP1_cer_C1_D1_G1_GS1	URE2	cer	YPD_to_Low_N	TP1	0	YPD	URE2.YPD_to_Low_N.0	C1	D1	G1	GS1	TCTTCGA	4
RFX1_TP3_hyb_H2_C2_G2_GS4	RFX1	hyb	YPD_to_Low_N	TP3	960	low N	RFX1.YPD_to_Low_N.960	H2	C2	G2	GS4	TTGCCAG	59
NRG1_TP2_par_P1_E5_E10_GS2	NRG1	par	YPD_to_Low_N	TP2	60	low N	NRG1.YPD_to_Low_N.60	P1	E5	E10	GS2	AAGGTAC	54
AFT1_TP3_cer_P4C2_B5_H10_GS10	AFT1	cer	YPD_to_Low_N	TP3	960	low N	AFT1.YPD_to_Low_N.960	P4C2	B5	H10	GS10	CTGTGAG	34
WT_TP1_par_P5_B3_G6_GS13	WT	par	YPD_to_Low_N	TP1	0	YPD	WT.YPD_to_Low_N.0	P5	B3	G6	GS13	TTCCTGA	18
ROX1_TP3_hyb_P3H1_E2_A3_GS7	ROX1	hyb	YPD_to_Low_N	TP3	960	low N	ROX1.YPD_to_Low_N.960	P3H1	E2	A3	GS7	TGCACAA	13
MBP1_TP3_par_P2_C4_C7_GS5	MBP1	par	YPD_to_Low_N	TP3	960	low N	MBP1.YPD_to_Low_N.960	P2	C4	C7	GS5	CGGATTA	76
WT_TP2_cer_C3_F6_G12_GS8	WT	cer	YPD_to_Low_N	TP2	60	low N	WT.YPD_to_Low_N.60	C3	F6	G12	GS8	ATAGCGA	46
LEU3_TP2_hyb_H2_F2_B4_GS4	LEU3	hyb	YPD_to_Low_N	TP2	60	low N	LEU3.YPD_to_Low_N.60	H2	F2	B4	GS4	CGTAACT	14
INO2_TP3_hyb_P3H1_D3_A5_GS7	INO2	hyb	YPD_to_Low_N	TP3	960	low N	INO2.YPD_to_Low_N.960	P3H1	D3	A5	GS7	TACCAGT	20
AFT1_TP3_par_P3H1_A5_H10_GS7	AFT1	par	YPD_to_Low_N	TP3	960	low N	AFT1.YPD_to_Low_N.960	P3H1	A5	H10	GS7	TTCAAGC	33
GZF3_TP1_par_P4C2_C3_D5_GS9a	GZF3	par	YPD_to_Low_N	TP1	0	YPD	GZF3.YPD_to_Low_N.0	P4C2	C3	D5	GS9a	GGATCTA	19
PHD1_TP1_cer_remnants_A4_H1_GS9a	PHD1	cer	YPD_to_Low_N	TP1	0	YPD	PHD1.YPD_to_Low_N.0	remnants	A4	H1	GS9a	CTACAAG	48
LEU3_TP2_par_remnants_B5_B4_GS10	LEU3	par	YPD_to_Low_N	TP2	60	low N	LEU3.YPD_to_Low_N.60	remnants	B5	B4	GS10	CACAGAT	90
RPN4_TP1_cer_C1_B6_G11_GS1	RPN4	cer	YPD_to_Low_N	TP1	0	YPD	RPN4.YPD_to_Low_N.0	C1	B6	G11	GS1	GATCACA	42
MIG1_TP2_par_P2_D5_D10_GS5	MIG1	par	YPD_to_Low_N	TP2	60	low N	MIG1.YPD_to_Low_N.60	P2	D5	D10	GS5	GCAACTA	51
SKN7_TP1_hyb_H2_D4_D7_GS3	SKN7	hyb	YPD_to_Low_N	TP1	0	YPD	SKN7.YPD_to_Low_N.0	H2	D4	D7	GS3	CGGATTA	76
HAP5_TP3_par_slow_B2_C6_GS11	HAP5	par	YPD_to_Low_N	TP3	960	low N	HAP5.YPD_to_Low_N.960	slow	B2	C6	GS11	GGCTAGA	58
AFT1_TP1_par_P3H1_A2_H4_GS6	AFT1	par	YPD_to_Low_N	TP1	0	YPD	AFT1.YPD_to_Low_N.0	P3H1	A2	H4	GS6	GTATGCG	9
PHO4_TP2_par_P1_H5_F11_GS2	PHO4	par	YPD_to_Low_N	TP2	60	low N	PHO4.YPD_to_Low_N.60	P1	H5	F11	GS2	CTACAGC	56
ZAP1_TP1_hyb_H3_A1_D3_GS12	ZAP1	hyb	YPD_to_Low_N	TP1	0	YPD	ZAP1.YPD_to_Low_N.0	H3	A1	D3	GS12	CTATTCG	1
HAP3_TP3_cer_H3_G6_A12_GS12	HAP3	cer	YPD_to_Low_N	TP3	960	low N	HAP3.YPD_to_Low_N.960	H3	G6	A12	GS12	CCATGGT	94
NRG1_TP1_hyb_H2_G2_E4_GS3	NRG1	hyb	YPD_to_Low_N	TP1	0	YPD	NRG1.YPD_to_Low_N.0	H2	G2	E4	GS3	AACAGCT	63
MIG1_TP3_cer_P4C2_G4_D10_GS10	MIG1	cer	YPD_to_Low_N	TP3	960	low N	MIG1.YPD_to_Low_N.960	P4C2	G4	D10	GS10	CGCATAT	31
ROX1_TP1_par_P3H1_G4_A9_GS6	ROX1	par	YPD_to_Low_N	TP1	0	YPD	ROX1.YPD_to_Low_N.0	P3H1	G4	A9	GS6	CGCATAT	31
WT_TP3_par_P5_B3_G6_GS14	WT	par	YPD_to_Low_N	TP3	960	low N	WT.YPD_to_Low_N.960	P5	B3	G6	GS14	TTCCTGA	18
INO2_TP2_cer_H3_F6_A11_GS12	INO2	cer	YPD_to_Low_N	TP2	60	low N	INO2.YPD_to_Low_N.60	H3	F6	A11	GS12	TCGAAGG	61
GCR2_TP2_par_remnants2_G5_G4_GS8	GCR2	par	YPD_to_Low_N	TP2	60	low N	GCR2.YPD_to_Low_N.60	remnants2	G5	G4	GS8	CTACAAG	48
HAP5_TP1_par_P4C2_F3_C6_GS9a	HAP5	par	YPD_to_Low_N	TP1	0	YPD	HAP5.YPD_to_Low_N.0	P4C2	F3	C6	GS9a	AGCTAGT	22
PHO4_TP1_cer_C1_A3_F5_GS1	PHO4	cer	YPD_to_Low_N	TP1	0	YPD	PHO4.YPD_to_Low_N.0	C1	A3	F5	GS1	TGTCACG	17
RTG3_TP1_cer_C1_D6_F12_GS1	RTG3	cer	YPD_to_Low_N	TP1	0	YPD	RTG3.YPD_to_Low_N.0	C1	D6	F12	GS1	AGGCTAG	44
WT_TP1_cer_C3_E3_G6_GS7	WT	cer	YPD_to_Low_N	TP1	0	YPD	WT.YPD_to_Low_N.0	C3	E3	G6	GS7	CTGATGG	69
RPN4_TP3_par_slow_A2_G5_GS11	RPN4	par	YPD_to_Low_N	TP3	960	low N	RPN4.YPD_to_Low_N.960	slow	A2	G5	GS11	CTTAGTG	57
GCN4_TP1_cer_H3_E6_A10_GS12	GCN4	cer	YPD_to_Low_N	TP1	0	YPD	GCN4.YPD_to_Low_N.0	H3	E6	A10	GS12	GAATAGC	28
SKN7_TP2_par_P3H1_A4_D7_GS6	SKN7	par	YPD_to_Low_N	TP2	60	low N	SKN7.YPD_to_Low_N.60	P3H1	A4	D7	GS6	AGTCTCC	73
ARG81_TP3_hyb_H2_E2_F3_GS4	ARG81	hyb	YPD_to_Low_N	TP3	960	low N	ARG81.YPD_to_Low_N.960	H2	E2	F3	GS4	TCGAAGG	61
HAP2_TP2_par_P2_A3_H5_GS5	HAP2	par	YPD_to_Low_N	TP2	60	low N	HAP2.YPD_to_Low_N.60	P2	A3	H5	GS5	CTAAGCG	39
WT_TP2_cer_C3_A6_G12_GS8	WT	cer	YPD_to_Low_N	TP2	60	low N	WT.YPD_to_Low_N.60	C3	A6	G12	GS8	CGCTTGA	41
RTG1_TP1_cer_P4C2_E2_E6_GS9a	RTG1	cer	YPD_to_Low_N	TP1	0	YPD	RTG1.YPD_to_Low_N.0	P4C2	E2	E6	GS9a	TGCACAA	13
SKN7_TP1_hyb_H2_D1_D1_GS3	SKN7	hyb	YPD_to_Low_N	TP1	0	YPD	SKN7.YPD_to_Low_N.0	H2	D1	D1	GS3	AGGCGTT	52
NRG1_TP1_par_P2_E5_E10_GS5	NRG1	par	YPD_to_Low_N	TP1	0	YPD	NRG1.YPD_to_Low_N.0	P2	E5	E10	GS5	TACCAGT	20
FKH1_TP1_par_P2_B4_B7_GS5	FKH1	par	YPD_to_Low_N	TP1	0	YPD	FKH1.YPD_to_Low_N.0	P2	B4	B7	GS5	GCAGTAG	11
GLN3_TP2_hyb_remnants_B3_C5_GS10	GLN3	hyb	YPD_to_Low_N	TP2	60	low N	GLN3.YPD_to_Low_N.60	remnants	B3	C5	GS10	AGCCGAT	40
DAL80_TP1_par_P1_G5_E11_GS2	DAL80	par	YPD_to_Low_N	TP1	0	YPD	DAL80.YPD_to_Low_N.0	P1	G5	E11	GS2	ACTTGGC	23
MET28_TP3_par_P4C2_G3_D6_GS10	MET28	par	YPD_to_Low_N	TP3	960	low N	MET28.YPD_to_Low_N.960	P4C2	G3	D6	GS10	ACTTGGC	23
HAP2_TP1_par_P2_A3_H5_GS5	HAP2	par	YPD_to_Low_N	TP1	0	YPD	HAP2.YPD_to_Low_N.0	P2	A3	H5	GS5	AACGTTC	7
GLN3_TP2_hyb_remnants_E3_C11_GS10	GLN3	hyb	YPD_to_Low_N	TP2	60	low N	GLN3.YPD_to_Low_N.60	remnants	E3	C11	GS10	ATAGCGA	46
STB5_TP2_cer_P4C2_C1_B3_GS9b	STB5	cer	YPD_to_Low_N	TP2	60	low N	STB5.YPD_to_Low_N.60	P4C2	C1	B3	GS9b	GCAACTA	51
INO4_TP2_hyb_P3H1_E3_B5_GS6	INO4	hyb	YPD_to_Low_N	TP2	60	low N	INO4.YPD_to_Low_N.60	P3H1	E3	B5	GS6	CTGATGG	69
ROX1_TP2_cer_C1_D2_A3_GS1	ROX1	cer	YPD_to_Low_N	TP2	60	low N	ROX1.YPD_to_Low_N.60	C1	D2	A3	GS1	CGTTGAA	60
RFX1_TP1_cer_C3_F4_G8_GS7	RFX1	cer	YPD_to_Low_N	TP1	0	YPD	RFX1.YPD_to_Low_N.0	C3	F4	G8	GS7	ACGCTAT	78
GLN3_TP1_cer_P4C2_C5_C11_GS9a	GLN3	cer	YPD_to_Low_N	TP1	0	YPD	GLN3.YPD_to_Low_N.0	P4C2	C5	C11	GS9a	CTAGTGC	35
AFT1_TP3_par_P3H1_A2_H4_GS7	AFT1	par	YPD_to_Low_N	TP3	960	low N	AFT1.YPD_to_Low_N.960	P3H1	A2	H4	GS7	GTATGCG	9
INO4_TP2_hyb_P3H1_E6_B11_GS6	INO4	hyb	YPD_to_Low_N	TP2	60	low N	INO4.YPD_to_Low_N.60	P3H1	E6	B11	GS6	TCGACTC	93
RIM101_TP3_par_P2_H4_H8_GS5	RIM101	par	YPD_to_Low_N	TP3	960	low N	RIM101.YPD_to_Low_N.960	P2	H4	H8	GS5	TCGATAC	79
RGT1_TP3_par_P1_F2_F4_GS2	RGT1	par	YPD_to_Low_N	TP3	960	low N	RGT1.YPD_to_Low_N.960	P1	F2	F4	GS2	AGTCTCC	73
SWI5_TP2_cer_C1_C4_F7_GS1	SWI5	cer	YPD_to_Low_N	TP2	60	low N	SWI5.YPD_to_Low_N.60	C1	C4	F7	GS1	ATCAGGC	75
FKH1_TP3_par_P1_B1_B1_GS2	FKH1	par	YPD_to_Low_N	TP3	960	low N	FKH1.YPD_to_Low_N.960	P1	B1	B1	GS2	TGGAGCA	65
WT_TP3_par_P5_F5_G12_GS14	WT	par	YPD_to_Low_N	TP3	960	low N	WT.YPD_to_Low_N.960	P5	F5	G12	GS14	CATGCTG	38
HAP4_TP2_hyb_H3_G4_B12_GS12	HAP4	hyb	YPD_to_Low_N	TP2	60	low N	HAP4.YPD_to_Low_N.60	H3	G4	B12	GS12	AGGCGTT	52
YAP1_TP2_cer_P4C2_D4_C9_GS9b	YAP1	cer	YPD_to_Low_N	TP2	60	low N	YAP1.YPD_to_Low_N.60	P4C2	D4	C9	GS9b	CGGATTA	76
GLN3_TP2_par_slow_H1_C5_GS11	GLN3	par	YPD_to_Low_N	TP2	60	low N	GLN3.YPD_to_Low_N.60	slow	H1	C5	GS11	ATCTGTC	8
GAT1_TP2_par_P1_F4_B8_GS2	GAT1	par	YPD_to_Low_N	TP2	60	low N	GAT1.YPD_to_Low_N.60	P1	F4	B8	GS2	TACTAGC	50
TEC1_TP1_hyb_H2_A2_D2_GS3	TEC1	hyb	YPD_to_Low_N	TP1	0	YPD	TEC1.YPD_to_Low_N.0	H2	A2	D2	GS3	CTTAGTG	57
RPN4_TP2_cer_C1_B3_G5_GS1	RPN4	cer	YPD_to_Low_N	TP2	60	low N	RPN4.YPD_to_Low_N.60	C1	B3	G5	GS1	CAATCGA	66
ZAP1_TP1_hyb_remnants_C1_D9_GS9a	ZAP1	hyb	YPD_to_Low_N	TP1	0	YPD	ZAP1.YPD_to_Low_N.0	remnants	C1	D9	GS9a	TAGCGCA	24
SWI4_TP2_hyb_remnants_D3_E7_GS10	SWI4	hyb	YPD_to_Low_N	TP2	60	low N	SWI4.YPD_to_Low_N.60	remnants	D3	E7	GS10	AGGCTAG	44
INO4_TP2_cer_C1_G5_B11_GS1	INO4	cer	YPD_to_Low_N	TP2	60	low N	INO4.YPD_to_Low_N.60	C1	G5	B11	GS1	TCTGGAG	87
HAP3_TP1_par_P1_B3_A6_GS2	HAP3	par	YPD_to_Low_N	TP1	0	YPD	HAP3.YPD_to_Low_N.0	P1	B3	A6	GS2	CAGTACG	12
RGT1_TP1_par_P2_F5_F10_GS5	RGT1	par	YPD_to_Low_N	TP1	0	YPD	RGT1.YPD_to_Low_N.0	P2	F5	F10	GS5	GGAGACT	21
MET28_TP3_par_P5_A5_D12_GS14	MET28	par	YPD_to_Low_N	TP3	960	low N	MET28.YPD_to_Low_N.960	P5	A5	D12	GS14	TTCAAGC	33
ACE2_TP2_par_P5_D2_A7_GS13	ACE2	par	YPD_to_Low_N	TP2	60	low N	ACE2.YPD_to_Low_N.60	P5	D2	A7	GS13	CGTTGAA	60
WT_TP3_cer_C3_C6_G12_GS8	WT	cer	YPD_to_Low_N	TP3	960	low N	WT.YPD_to_Low_N.960	C3	C6	G12	GS8	CTTCGAA	91
PHD1_TP1_cer_remnants_A1_H1_GS9a	PHD1	cer	YPD_to_Low_N	TP1	0	YPD	PHD1.YPD_to_Low_N.0	remnants	A1	H1	GS9a	ATAACCG	16
WT_TP3_cer_C3_D6_G12_GS8	WT	cer	YPD_to_Low_N	TP3	960	low N	WT.YPD_to_Low_N.960	C3	D6	G12	GS8	CGTCAGA	92
INO4_TP3_cer_C1_G2_B5_GS3	INO4	cer	YPD_to_Low_N	TP3	960	low N	INO4.YPD_to_Low_N.960	C1	G2	B5	GS3	AGCTCAA	15
HAP1_TP1_cer_C1_A2_E2_GS1	HAP1	cer	YPD_to_Low_N	TP1	0	YPD	HAP1.YPD_to_Low_N.0	C1	A2	E2	GS1	GTATGCG	9
WT_TP1_par_P5_E2_G6_GS13	WT	par	YPD_to_Low_N	TP1	0	YPD	WT.YPD_to_Low_N.0	P5	E2	G6	GS13	TGCACAA	13
RTG1_TP2_cer_P4C2_E2_E6_GS9b	RTG1	cer	YPD_to_Low_N	TP2	60	low N	RTG1.YPD_to_Low_N.60	P4C2	E2	E6	GS9b	TCGAAGG	61
WT_TP2_par_P5_G5_G12_GS13	WT	par	YPD_to_Low_N	TP2	60	low N	WT.YPD_to_Low_N.60	P5	G5	G12	GS13	TCTGGAG	87
GLN3_TP3_cer_P4C2_C2_C5_GS10	GLN3	cer	YPD_to_Low_N	TP3	960	low N	GLN3.YPD_to_Low_N.960	P4C2	C2	C5	GS10	GCAGTAG	11
GAT1_TP1_cer_C1_G4_B8_GS1	GAT1	cer	YPD_to_Low_N	TP1	0	YPD	GAT1.YPD_to_Low_N.0	C1	G4	B8	GS1	CGCATAT	31
BAS1_TP1_par_P1_B5_G9_GS2	BAS1	par	YPD_to_Low_N	TP1	0	YPD	BAS1.YPD_to_Low_N.0	P1	B5	G9	GS2	TACCAGT	20
WT_TP3_par_P5_E6_G12_GS14	WT	par	YPD_to_Low_N	TP3	960	low N	WT.YPD_to_Low_N.960	P5	E6	G12	GS14	CTACGTA	45
WT_TP3_cer_C3_G3_G6_GS8	WT	cer	YPD_to_Low_N	TP3	960	low N	WT.YPD_to_Low_N.960	C3	G3	G6	GS8	TACGAGG	71
RFX1_TP2_hyb_H2_C5_G8_GS4	RFX1	hyb	YPD_to_Low_N	TP2	60	low N	RFX1.YPD_to_Low_N.60	H2	C5	G8	GS4	CTAGTGC	35
SKN7_TP2_cer_C3_E1_D1_GS8	SKN7	cer	YPD_to_Low_N	TP2	60	low N	SKN7.YPD_to_Low_N.60	C3	E1	D1	GS8	AGCACTG	5
WT_TP2_par_P5_F2_G6_GS13	WT	par	YPD_to_Low_N	TP2	60	low N	WT.YPD_to_Low_N.60	P5	F2	G6	GS13	TATAGGC	62
RIM101_TP1_cer_C1_C5_H8_GS1	RIM101	cer	YPD_to_Low_N	TP1	0	YPD	RIM101.YPD_to_Low_N.0	C1	C5	H8	GS1	CTAGTGC	35
HAP2_TP1_hyb_H3_D4_H11_GS12	HAP2	hyb	YPD_to_Low_N	TP1	0	YPD	HAP2.YPD_to_Low_N.0	H3	D4	H11	GS12	GCAGTAG	11
GAT1_TP3_cer_C1_G4_B8_GS3	GAT1	cer	YPD_to_Low_N	TP3	960	low N	GAT1.YPD_to_Low_N.960	C1	G4	B8	GS3	CGCATAT	31
RTG1_TP1_par_P1_C3_E6_GS2	RTG1	par	YPD_to_Low_N	TP1	0	YPD	RTG1.YPD_to_Low_N.0	P1	C3	E6	GS2	TGCACAA	13
STB5_TP2_par_slow_E4_B9_GS11	STB5	par	YPD_to_Low_N	TP2	60	low N	STB5.YPD_to_Low_N.60	slow	E4	B9	GS11	ACTGCAG	29
GLN3_TP2_par_P4C2_B3_C5_GS9b	GLN3	par	YPD_to_Low_N	TP2	60	low N	GLN3.YPD_to_Low_N.60	P4C2	B3	C5	GS9b	CAATCGA	66
AFT1_TP3_cer_P4C2_B2_H4_GS10	AFT1	cer	YPD_to_Low_N	TP3	960	low N	AFT1.YPD_to_Low_N.960	P4C2	B2	H4	GS10	ATCTGCA	10
MBP1_TP3_hyb_remnants_C3_C7_GS11	MBP1	hyb	YPD_to_Low_N	TP3	960	low N	MBP1.YPD_to_Low_N.960	remnants	C3	C7	GS11	CTTGCAG	36
MET28_TP2_cer_remnants_G4_D6_GS10	MET28	cer	YPD_to_Low_N	TP2	60	low N	MET28.YPD_to_Low_N.60	remnants	G4	D6	GS10	TACGAGG	71
FKH1_TP3_hyb_H2_B4_B7_GS4	FKH1	hyb	YPD_to_Low_N	TP3	960	low N	FKH1.YPD_to_Low_N.960	H2	B4	B7	GS4	GACACTG	74
BAS1_TP1_par_P2_B5_G9_GS5	BAS1	par	YPD_to_Low_N	TP1	0	YPD	BAS1.YPD_to_Low_N.0	P2	B5	G9	GS5	TGTCACG	17
RGT1_TP2_par_P2_F5_F10_GS5	RGT1	par	YPD_to_Low_N	TP2	60	low N	RGT1.YPD_to_Low_N.60	P2	F5	F10	GS5	CGCTACA	53
CHA4_TP1_hyb_remnants_D4_C10_GS9b	CHA4	hyb	YPD_to_Low_N	TP1	0	YPD	CHA4.YPD_to_Low_N.0	remnants	D4	C10	GS9b	AACGGTG	72
SUM1_TP3_par_P4C2_F5_C8_GS10	SUM1	par	YPD_to_Low_N	TP3	960	low N	SUM1.YPD_to_Low_N.960	P4C2	F5	C8	GS10	CATGCTG	38
STB5_TP2_cer_P4C2_C4_B9_GS9b	STB5	cer	YPD_to_Low_N	TP2	60	low N	STB5.YPD_to_Low_N.60	P4C2	C4	B9	GS9b	ATCAGGC	75
INO4_TP3_hyb_P3H1_E6_B11_GS7	INO4	hyb	YPD_to_Low_N	TP3	960	low N	INO4.YPD_to_Low_N.960	P3H1	E6	B11	GS7	CTACGTA	45
WT_TP2_par_P5_G3_G6_GS13	WT	par	YPD_to_Low_N	TP2	60	low N	WT.YPD_to_Low_N.60	P5	G3	G6	GS13	TACGAGG	71
HAP2_TP2_hyb_H3_D1_H5_GS12	HAP2	hyb	YPD_to_Low_N	TP2	60	low N	HAP2.YPD_to_Low_N.60	H3	D1	H5	GS12	CTTGCAG	36
WT_TP3_par_P1_E3_G6_GS2	WT	par	YPD_to_Low_N	TP3	960	low N	WT.YPD_to_Low_N.960	P1	E3	G6	GS2	TCGATAC	79
HAP3_TP1_cer_H3_G6_A12_GS12	HAP3	cer	YPD_to_Low_N	TP1	0	YPD	HAP3.YPD_to_Low_N.0	H3	G6	A12	GS12	CTTACGG	30
MSN2_TP2_hyb_H2_B2_F2_GS4	MSN2	hyb	YPD_to_Low_N	TP2	60	low N	MSN2.YPD_to_Low_N.60	H2	B2	F2	GS4	ATCTGCA	10
CHA4_TP1_hyb_remnants_D1_C10_GS9a	CHA4	hyb	YPD_to_Low_N	TP1	0	YPD	CHA4.YPD_to_Low_N.0	remnants	D1	C10	GS9a	CCTAAGG	25
ZAP1_TP3_hyb_remnants_C1_D9_GS11	ZAP1	hyb	YPD_to_Low_N	TP3	960	low N	ZAP1.YPD_to_Low_N.960	remnants	C1	D9	GS11	TACCAGT	20
MSN2_TP3_par_P1_G4_F8_GS2	MSN2	par	YPD_to_Low_N	TP3	960	low N	MSN2.YPD_to_Low_N.960	P1	G4	F8	GS2	CGAGTCT	83
GCR2_TP3_par_remnants2_G5_G4_GS13	GCR2	par	YPD_to_Low_N	TP3	960	low N	GCR2.YPD_to_Low_N.960	remnants2	G5	G4	GS13	CTTACGG	30
MBP1_TP2_hyb_remnants_C6_C7_GS10	MBP1	hyb	YPD_to_Low_N	TP2	60	low N	MBP1.YPD_to_Low_N.60	remnants	C6	C7	GS10	CGTCAGA	92
ROX1_TP1_cer_C1_D2_A3_GS1	ROX1	cer	YPD_to_Low_N	TP1	0	YPD	ROX1.YPD_to_Low_N.0	C1	D2	A3	GS1	CAGTACG	12
MET28_TP1_par_P5_A2_D12_GS13	MET28	par	YPD_to_Low_N	TP1	0	YPD	MET28.YPD_to_Low_N.0	P5	A2	D12	GS13	GTATGCG	9
GCN4_TP3_par_P1_C2_A4_GS2	GCN4	par	YPD_to_Low_N	TP3	960	low N	GCN4.YPD_to_Low_N.960	P1	C2	A4	GS2	GCTTAGA	70
STB5_TP3_par_slow_E4_B9_GS11	STB5	par	YPD_to_Low_N	TP3	960	low N	STB5.YPD_to_Low_N.960	slow	E4	B9	GS11	TCTCGAA	77
WT_TP3_cer_C3_G5_G12_GS8	WT	cer	YPD_to_Low_N	TP3	960	low N	WT.YPD_to_Low_N.960	C3	G5	G12	GS8	TCTGGAG	87
MBP1_TP1_hyb_remnants_C3_C7_GS9a	MBP1	hyb	YPD_to_Low_N	TP1	0	YPD	MBP1.YPD_to_Low_N.0	remnants	C3	C7	GS9a	GATCACA	42
FKH1_TP1_hyb_H2_B1_B1_GS3	FKH1	hyb	YPD_to_Low_N	TP1	0	YPD	FKH1.YPD_to_Low_N.0	H2	B1	B1	GS3	TACTAGC	50
WT_TP3_cer_C3_E6_G12_GS8	WT	cer	YPD_to_Low_N	TP3	960	low N	WT.YPD_to_Low_N.960	C3	E6	G12	GS8	TCGACTC	93
CBF1_TP3_hyb_slow_H2_H3_GS11	CBF1	hyb	YPD_to_Low_N	TP3	960	low N	CBF1.YPD_to_Low_N.960	slow	H2	H3	GS11	TCACAAG	64
ARG80_TP2_hyb_P3H1_H5_E9_GS6	ARG80	hyb	YPD_to_Low_N	TP2	60	low N	ARG80.YPD_to_Low_N.60	P3H1	H5	E9	GS6	AACTCGT	88
WT_TP2_par_P5_G6_G12_GS13	WT	par	YPD_to_Low_N	TP2	60	low N	WT.YPD_to_Low_N.60	P5	G6	G12	GS13	TACGTAC	95
WT_TP1_cer_C1_G3_G6_GS1	WT	cer	YPD_to_Low_N	TP1	0	YPD	WT.YPD_to_Low_N.0	C1	G3	G6	GS1	ACTTGGC	23
RTG1_TP3_par_P2_C3_E6_GS5	RTG1	par	YPD_to_Low_N	TP3	960	low N	RTG1.YPD_to_Low_N.960	P2	C3	E6	GS5	AGTCTCC	73
PHO4_TP1_hyb_slow_B3_F5_GS10	PHO4	hyb	YPD_to_Low_N	TP1	0	YPD	PHO4.YPD_to_Low_N.0	slow	B3	F5	GS10	CAATCGA	66
ZAP1_TP1_par_remnants_A5_D3_GS9b	ZAP1	par	YPD_to_Low_N	TP1	0	YPD	ZAP1.YPD_to_Low_N.0	remnants	A5	D3	GS9b	ACGCTAT	78
ZAP1_TP2_par_remnants_A5_D3_GS10	ZAP1	par	YPD_to_Low_N	TP2	60	low N	ZAP1.YPD_to_Low_N.60	remnants	A5	D3	GS10	CCTGATG	89
ACE2_TP3_cer_C3_A1_A1_GS8	ACE2	cer	YPD_to_Low_N	TP3	960	low N	ACE2.YPD_to_Low_N.960	C3	A1	A1	GS8	CATGAAC	49
HAP2_TP3_hyb_H3_D4_H11_GS12	HAP2	hyb	YPD_to_Low_N	TP3	960	low N	HAP2.YPD_to_Low_N.960	H3	D4	H11	GS12	ATCAGGC	75
WT_TP1_cer_C3_A3_G6_GS7	WT	cer	YPD_to_Low_N	TP1	0	YPD	WT.YPD_to_Low_N.0	C3	A3	G6	GS7	TGGAGCA	65
RGT1_TP3_cer_C1_F5_F10_GS3	RGT1	cer	YPD_to_Low_N	TP3	960	low N	RGT1.YPD_to_Low_N.960	C1	F5	F10	GS3	CATGCTG	38
RPN4_TP2_hyb_remnants_G6_G11_GS10	RPN4	hyb	YPD_to_Low_N	TP2	60	low N	RPN4.YPD_to_Low_N.60	remnants	G6	G11	GS10	CCATGGT	94
WT_TP2_cer_C3_G2_G6_GS8	WT	cer	YPD_to_Low_N	TP2	60	low N	WT.YPD_to_Low_N.60	C3	G2	G6	GS8	AGCTCAA	15
RGT1_TP2_par_P2_F2_F4_GS5	RGT1	par	YPD_to_Low_N	TP2	60	low N	RGT1.YPD_to_Low_N.60	P2	F2	F4	GS5	CATGCTG	38
ACE2_TP1_par_P5_D2_A7_GS13	ACE2	par	YPD_to_Low_N	TP1	0	YPD	ACE2.YPD_to_Low_N.0	P5	D2	A7	GS13	CAGTACG	12
YAP1_TP3_par_P2_A5_C9_GS5	YAP1	par	YPD_to_Low_N	TP3	960	low N	YAP1.YPD_to_Low_N.960	P2	A5	C9	GS5	TGACGGA	80
WT_TP2_cer_C3_D6_G12_GS8	WT	cer	YPD_to_Low_N	TP2	60	low N	WT.YPD_to_Low_N.60	C3	D6	G12	GS8	AGGCTAG	44
URE2_TP3_hyb_H2_E1_G1_GS4	URE2	hyb	YPD_to_Low_N	TP3	960	low N	URE2.YPD_to_Low_N.960	H2	E1	G1	GS4	CGCTACA	53
GZF3_TP1_par_P4C2_C6_D11_GS9a	GZF3	par	YPD_to_Low_N	TP1	0	YPD	GZF3.YPD_to_Low_N.0	P4C2	C6	D11	GS9a	GTGCTAT	43
SWI4_TP1_cer_slow_A1_E1_GS10	SWI4	cer	YPD_to_Low_N	TP1	0	YPD	SWI4.YPD_to_Low_N.0	slow	A1	E1	GS10	CATGAAC	49
HAP5_TP3_hyb_P3H1_G3_C6_GS7	HAP5	hyb	YPD_to_Low_N	TP3	960	low N	HAP5.YPD_to_Low_N.960	P3H1	G3	C6	GS7	ACTTGGC	23
SKN7_TP2_hyb_H2_D1_D1_GS4	SKN7	hyb	YPD_to_Low_N	TP2	60	low N	SKN7.YPD_to_Low_N.60	H2	D1	D1	GS4	TCTTCGA	4
RFX1_TP1_cer_C3_F1_G2_GS7	RFX1	cer	YPD_to_Low_N	TP1	0	YPD	RFX1.YPD_to_Low_N.0	C3	F1	G2	GS7	AAGGTAC	54
WT_TP3_par_P5_A3_G6_GS14	WT	par	YPD_to_Low_N	TP3	960	low N	WT.YPD_to_Low_N.960	P5	A3	G6	GS14	TGTCACG	17
GCR2_TP1_hyb_slow_A6_G10_GS10	GCR2	hyb	YPD_to_Low_N	TP1	0	YPD	GCR2.YPD_to_Low_N.0	slow	A6	G10	GS10	TGCCTAA	85
ZAP1_TP2_cer_C3_G4_D9_GS8	ZAP1	cer	YPD_to_Low_N	TP2	60	low N	ZAP1.YPD_to_Low_N.60	C3	G4	D9	GS8	CGCATAT	31
GAT1_TP2_cer_C1_G4_B8_GS1	GAT1	cer	YPD_to_Low_N	TP2	60	low N	GAT1.YPD_to_Low_N.60	C1	G4	B8	GS1	TCGATAC	79
ARG81_TP2_cer_C1_E2_F3_GS1	ARG81	cer	YPD_to_Low_N	TP2	60	low N	ARG81.YPD_to_Low_N.60	C1	E2	F3	GS1	TCGAAGG	61
ACE2_TP1_cer_remnants_F1_A7_GS9a	ACE2	cer	YPD_to_Low_N	TP1	0	YPD	ACE2.YPD_to_Low_N.0	remnants	F1	A7	GS9a	ACTGCAG	29
INO2_TP2_hyb_P3H1_D6_A11_GS6	INO2	hyb	YPD_to_Low_N	TP2	60	low N	INO2.YPD_to_Low_N.60	P3H1	D6	A11	GS6	CGTCAGA	92
WT_TP1_cer_C1_E3_G6_GS1	WT	cer	YPD_to_Low_N	TP1	0	YPD	WT.YPD_to_Low_N.0	C1	E3	G6	GS1	GGAGACT	21
INO4_TP2_cer_C1_G2_B5_GS1	INO4	cer	YPD_to_Low_N	TP2	60	low N	INO4.YPD_to_Low_N.60	C1	G2	B5	GS1	AACAGCT	63
PHO4_TP2_cer_C1_A6_F11_GS1	PHO4	cer	YPD_to_Low_N	TP2	60	low N	PHO4.YPD_to_Low_N.60	C1	A6	F11	GS1	CCTGATG	89
RPN4_TP3_cer_C1_B6_G11_GS3	RPN4	cer	YPD_to_Low_N	TP3	960	low N	RPN4.YPD_to_Low_N.960	C1	B6	G11	GS3	GATCACA	42
HAP5_TP3_cer_C3_E5_C12_GS8	HAP5	cer	YPD_to_Low_N	TP3	960	low N	HAP5.YPD_to_Low_N.960	C3	E5	C12	GS8	TGCCTAA	85
CBF1_TP1_par_slow_F3_H3_GS10	CBF1	par	YPD_to_Low_N	TP1	0	YPD	CBF1.YPD_to_Low_N.0	slow	F3	H3	GS10	GCTTAGA	70
INO2_TP3_cer_H3_F3_A5_GS12	INO2	cer	YPD_to_Low_N	TP3	960	low N	INO2.YPD_to_Low_N.960	H3	F3	A5	GS12	CCTGACT	86
MIG1_TP3_par_P2_D5_D10_GS5	MIG1	par	YPD_to_Low_N	TP3	960	low N	MIG1.YPD_to_Low_N.960	P2	D5	D10	GS5	CGAGTCT	83
ROX1_TP3_hyb_P3H1_E5_A9_GS7	ROX1	hyb	YPD_to_Low_N	TP3	960	low N	ROX1.YPD_to_Low_N.960	P3H1	E5	A9	GS7	ATGCCAA	37
WT_TP2_par_P5_H2_G6_GS13	WT	par	YPD_to_Low_N	TP2	60	low N	WT.YPD_to_Low_N.60	P5	H2	G6	GS13	TCACAAG	64
DAL80_TP2_hyb_H2_B3_E5_GS4	DAL80	hyb	YPD_to_Low_N	TP2	60	low N	DAL80.YPD_to_Low_N.60	H2	B3	E5	GS4	TTCCTGA	18
RGT1_TP3_hyb_H2_H2_F4_GS4	RGT1	hyb	YPD_to_Low_N	TP3	960	low N	RGT1.YPD_to_Low_N.960	H2	H2	F4	GS4	TCACAAG	64
FKH1_TP3_cer_C1_A4_B7_GS3	FKH1	cer	YPD_to_Low_N	TP3	960	low N	FKH1.YPD_to_Low_N.960	C1	A4	B7	GS3	CCTAAGG	25
GLN3_TP2_par_slow_H4_C11_GS11	GLN3	par	YPD_to_Low_N	TP2	60	low N	GLN3.YPD_to_Low_N.60	slow	H4	C11	GS11	GCCTACA	32
RTG3_TP1_cer_C1_D3_F6_GS1	RTG3	cer	YPD_to_Low_N	TP1	0	YPD	RTG3.YPD_to_Low_N.0	C1	D3	F6	GS1	TACCAGT	20
ZAP1_TP2_hyb_remnants_C4_D9_GS10	ZAP1	hyb	YPD_to_Low_N	TP2	60	low N	ZAP1.YPD_to_Low_N.60	remnants	C4	D9	GS10	AAGGTAC	54
HAP1_TP1_hyb_P3H1_D5_E8_GS6	HAP1	hyb	YPD_to_Low_N	TP1	0	YPD	HAP1.YPD_to_Low_N.0	P3H1	D5	E8	GS6	CTTGCAG	36
URE2_TP3_cer_C1_D4_G7_GS3	URE2	cer	YPD_to_Low_N	TP3	960	low N	URE2.YPD_to_Low_N.960	C1	D4	G7	GS3	GAATAGC	28
URE2_TP2_par_P3H1_B4_G7_GS6	URE2	par	YPD_to_Low_N	TP2	60	low N	URE2.YPD_to_Low_N.60	P3H1	B4	G7	GS6	GACACTG	74
WT_TP2_cer_C1_F6_G12_GS1	WT	cer	YPD_to_Low_N	TP2	60	low N	WT.YPD_to_Low_N.60	C1	F6	G12	GS1	CCATGGT	94
ZAP1_TP3_par_P2_H5_D9_GS5	ZAP1	par	YPD_to_Low_N	TP3	960	low N	ZAP1.YPD_to_Low_N.960	P2	H5	D9	GS5	TCTGGAG	87
WT_TP2_par_P5_A3_G6_GS13	WT	par	YPD_to_Low_N	TP2	60	low N	WT.YPD_to_Low_N.60	P5	A3	G6	GS13	TGGAGCA	65
BAS1_TP3_par_P2_B2_G3_GS5	BAS1	par	YPD_to_Low_N	TP3	960	low N	BAS1.YPD_to_Low_N.960	P2	B2	G3	GS5	ACCGATC	68
HAP5_TP1_par_P5_G4_C12_GS13	HAP5	par	YPD_to_Low_N	TP1	0	YPD	HAP5.YPD_to_Low_N.0	P5	G4	C12	GS13	CGCATAT	31
GCN4_TP2_cer_H3_E6_A10_GS12	GCN4	cer	YPD_to_Low_N	TP2	60	low N	GCN4.YPD_to_Low_N.60	H3	E6	A10	GS12	CGTTGAA	60
WT_TP3_par_remnants2_D5_G6_GS13	WT	par	YPD_to_Low_N	TP3	960	low N	WT.YPD_to_Low_N.960	remnants2	D5	G6	GS13	AAGGTAC	54
SWI5_TP3_par_P2_E1_F1_GS5	SWI5	par	YPD_to_Low_N	TP3	960	low N	SWI5.YPD_to_Low_N.960	P2	E1	F1	GS5	TGGAGCA	65
HAP5_TP3_par_P5_G4_C12_GS14	HAP5	par	YPD_to_Low_N	TP3	960	low N	HAP5.YPD_to_Low_N.960	P5	G4	C12	GS14	CGCATAT	31
RPN4_TP3_cer_C1_B3_G5_GS3	RPN4	cer	YPD_to_Low_N	TP3	960	low N	RPN4.YPD_to_Low_N.960	C1	B3	G5	GS3	TTCCTGA	18
PHD1_TP1_hyb_H2_F1_H1_GS3	PHD1	hyb	YPD_to_Low_N	TP1	0	YPD	PHD1.YPD_to_Low_N.0	H2	F1	H1	GS3	AAGGTAC	54
RGT1_TP2_cer_C1_F5_F10_GS1	RGT1	cer	YPD_to_Low_N	TP2	60	low N	RGT1.YPD_to_Low_N.60	C1	F5	F10	GS1	CCTGACT	86
LEU3_TP1_cer_C3_A5_B10_GS7	LEU3	cer	YPD_to_Low_N	TP1	0	YPD	LEU3.YPD_to_Low_N.0	C3	A5	B10	GS7	GCTTCAT	81
SUM1_TP2_hyb_H2_H4_C8_GS4	SUM1	hyb	YPD_to_Low_N	TP2	60	low N	SUM1.YPD_to_Low_N.60	H2	H4	C8	GS4	GCCTACA	32
HAP3_TP1_cer_C3_D4_A12_GS7	HAP3	cer	YPD_to_Low_N	TP1	0	YPD	HAP3.YPD_to_Low_N.0	C3	D4	A12	GS7	CGGATTA	76
DAL80_TP3_par_P1_G5_E11_GS2	DAL80	par	YPD_to_Low_N	TP3	960	low N	DAL80.YPD_to_Low_N.960	P1	G5	E11	GS2	TCTGGAG	87
SOK2_TP1_par_P3H1_D4_A8_GS6	SOK2	par	YPD_to_Low_N	TP1	0	YPD	SOK2.YPD_to_Low_N.0	P3H1	D4	A8	GS6	GAATAGC	28
CBF1_TP3_cer_P4C2_F1_H3_GS10	CBF1	cer	YPD_to_Low_N	TP3	960	low N	CBF1.YPD_to_Low_N.960	P4C2	F1	H3	GS10	AGTGCGT	6
SWI4_TP1_par_P1_D1_E1_GS2	SWI4	par	YPD_to_Low_N	TP1	0	YPD	SWI4.YPD_to_Low_N.0	P1	D1	E1	GS2	ACTCAGG	2
WT_TP1_cer_C3_G2_G6_GS7	WT	cer	YPD_to_Low_N	TP1	0	YPD	WT.YPD_to_Low_N.0	C3	G2	G6	GS7	AACAGCT	63
HAP5_TP2_par_P5_H1_C12_GS13	HAP5	par	YPD_to_Low_N	TP2	60	low N	HAP5.YPD_to_Low_N.60	P5	H1	C12	GS13	CTACAGC	56
SUM1_TP3_cer_P4C2_B1_C2_GS10	SUM1	cer	YPD_to_Low_N	TP3	960	low N	SUM1.YPD_to_Low_N.960	P4C2	B1	C2	GS10	ACTCAGG	2
WT_TP2_hyb_H3_D5_G12_GS12	WT	hyb	YPD_to_Low_N	TP2	60	low N	WT.YPD_to_Low_N.60	H3	D5	G12	GS12	GGCTAGA	58
WT_TP2_par_P5_E3_G6_GS13	WT	par	YPD_to_Low_N	TP2	60	low N	WT.YPD_to_Low_N.60	P5	E3	G6	GS13	CTGATGG	69
MET28_TP2_par_slow_C2_D6_GS11	MET28	par	YPD_to_Low_N	TP2	60	low N	MET28.YPD_to_Low_N.60	slow	C2	D6	GS11	GCAGTAG	11
WT_TP3_cer_C3_F5_G12_GS8	WT	cer	YPD_to_Low_N	TP3	960	low N	WT.YPD_to_Low_N.960	C3	F5	G12	GS8	CCTGACT	86
WT_TP2_par_P5_B6_G12_GS13	WT	par	YPD_to_Low_N	TP2	60	low N	WT.YPD_to_Low_N.60	P5	B6	G12	GS13	CACAGAT	90
ZAP1_TP1_par_slow_C5_D9_GS10	ZAP1	par	YPD_to_Low_N	TP1	0	YPD	ZAP1.YPD_to_Low_N.0	slow	C5	D9	GS10	GCTTCAT	81
ROX1_TP2_par_P3H1_G1_A3_GS6	ROX1	par	YPD_to_Low_N	TP2	60	low N	ROX1.YPD_to_Low_N.60	P3H1	G1	A3	GS6	AAGCCTT	55
HAP2_TP1_hyb_H3_E4_H11_GS12	HAP2	hyb	YPD_to_Low_N	TP1	0	YPD	HAP2.YPD_to_Low_N.0	H3	E4	H11	GS12	CAGTACG	12
FKH1_TP2_hyb_H2_B4_B7_GS4	FKH1	hyb	YPD_to_Low_N	TP2	60	low N	FKH1.YPD_to_Low_N.60	H2	B4	B7	GS4	GGCGATT	26
ARG80_TP3_hyb_P3H1_H5_E9_GS7	ARG80	hyb	YPD_to_Low_N	TP3	960	low N	ARG80.YPD_to_Low_N.960	P3H1	H5	E9	GS7	AGCCGAT	40
WT_TP1_par_P5_D6_G12_GS13	WT	par	YPD_to_Low_N	TP1	0	YPD	WT.YPD_to_Low_N.0	P5	D6	G12	GS13	AGGCTAG	44
YAP1_TP1_par_remnants2_G4_C3_GS7	YAP1	par	YPD_to_Low_N	TP1	0	YPD	YAP1.YPD_to_Low_N.0	remnants2	G4	C3	GS7	CGTAACT	14
AFT1_TP2_cer_P4C2_B5_H10_GS9b	AFT1	cer	YPD_to_Low_N	TP2	60	low N	AFT1.YPD_to_Low_N.60	P4C2	B5	H10	GS9b	GGCACTT	82
MIG1_TP3_cer_P4C2_G1_D4_GS10	MIG1	cer	YPD_to_Low_N	TP3	960	low N	MIG1.YPD_to_Low_N.960	P4C2	G1	D4	GS10	AACGTTC	7
ROX1_TP3_par_P3H1_G1_A3_GS7	ROX1	par	YPD_to_Low_N	TP3	960	low N	ROX1.YPD_to_Low_N.960	P3H1	G1	A3	GS7	AACGTTC	7
SKN7_TP1_par_P3H1_A4_D7_GS6	SKN7	par	YPD_to_Low_N	TP1	0	YPD	SKN7.YPD_to_Low_N.0	P3H1	A4	D7	GS6	CCTAAGG	25
WT_TP1_hyb_H2_E6_G12_GS3	WT	hyb	YPD_to_Low_N	TP1	0	YPD	WT.YPD_to_Low_N.0	H2	E6	G12	GS3	CGTCAGA	92
RFX1_TP1_hyb_H2_C5_G8_GS3	RFX1	hyb	YPD_to_Low_N	TP1	0	YPD	RFX1.YPD_to_Low_N.0	H2	C5	G8	GS3	CGAGTCT	83
PHD1_TP2_cer_C1_E4_H7_GS1	PHD1	cer	YPD_to_Low_N	TP2	60	low N	PHD1.YPD_to_Low_N.60	C1	E4	H7	GS1	TCTCGAA	77
ACE2_TP3_cer_remnants_F1_A7_GS11	ACE2	cer	YPD_to_Low_N	TP3	960	low N	ACE2.YPD_to_Low_N.960	remnants	F1	A7	GS11	TAGCGCA	24
MIG1_TP1_par_P2_D5_D10_GS5	MIG1	par	YPD_to_Low_N	TP1	0	YPD	MIG1.YPD_to_Low_N.0	P2	D5	D10	GS5	GGATCTA	19
SWI5_TP3_cer_C1_C1_F1_GS3	SWI5	cer	YPD_to_Low_N	TP3	960	low N	SWI5.YPD_to_Low_N.960	C1	C1	F1	GS3	ACACGTG	3
NRG1_TP2_cer_P4C2_H1_E4_GS9b	NRG1	cer	YPD_to_Low_N	TP2	60	low N	NRG1.YPD_to_Low_N.60	P4C2	H1	E4	GS9b	CTACAGC	56
SWI4_TP1_par_remnants2_G6_E7_GS7	SWI4	par	YPD_to_Low_N	TP1	0	YPD	SWI4.YPD_to_Low_N.0	remnants2	G6	E7	GS7	CTACAAG	48
TEC1_TP2_hyb_H2_A2_D2_GS4	TEC1	hyb	YPD_to_Low_N	TP2	60	low N	TEC1.YPD_to_Low_N.60	H2	A2	D2	GS4	GTATGCG	9
WT_TP3_cer_C3_E3_G6_GS8	WT	cer	YPD_to_Low_N	TP3	960	low N	WT.YPD_to_Low_N.960	C3	E3	G6	GS8	CTGATGG	69
PHD1_TP2_par_P3H1_C4_H7_GS6	PHD1	par	YPD_to_Low_N	TP2	60	low N	PHD1.YPD_to_Low_N.60	P3H1	C4	H7	GS6	ATCAGGC	75
GZF3_TP1_cer_C1_H5_D11_GS1	GZF3	cer	YPD_to_Low_N	TP1	0	YPD	GZF3.YPD_to_Low_N.0	C1	H5	D11	GS1	AGCCGAT	40
YAP1_TP3_cer_P4C2_D1_C3_GS10	YAP1	cer	YPD_to_Low_N	TP3	960	low N	YAP1.YPD_to_Low_N.960	P4C2	D1	C3	GS10	TCTTCGA	4
HAP5_TP2_hyb_P3H1_G3_C6_GS6	HAP5	hyb	YPD_to_Low_N	TP2	60	low N	HAP5.YPD_to_Low_N.60	P3H1	G3	C6	GS6	TACGAGG	71
STB5_TP3_cer_P4C2_C4_B9_GS10	STB5	cer	YPD_to_Low_N	TP3	960	low N	STB5.YPD_to_Low_N.960	P4C2	C4	B9	GS10	GCTGAAT	27
NRG1_TP3_par_P2_E5_E10_GS5	NRG1	par	YPD_to_Low_N	TP3	960	low N	NRG1.YPD_to_Low_N.960	P2	E5	E10	GS5	CAGTCAA	84
HAP1_TP3_par_P5_B1_E2_GS14	HAP1	par	YPD_to_Low_N	TP3	960	low N	HAP1.YPD_to_Low_N.960	P5	B1	E2	GS14	ACTCAGG	2
HAP5_TP1_par_P5_H1_C12_GS13	HAP5	par	YPD_to_Low_N	TP1	0	YPD	HAP5.YPD_to_Low_N.0	P5	H1	C12	GS13	ATCTGTC	8
FKH1_TP2_par_P1_B4_B7_GS2	FKH1	par	YPD_to_Low_N	TP2	60	low N	FKH1.YPD_to_Low_N.60	P1	B4	B7	GS2	CTACAAG	48
WT_TP1_cer_C3_F2_G6_GS7	WT	cer	YPD_to_Low_N	TP1	0	YPD	WT.YPD_to_Low_N.0	C3	F2	G6	GS7	TATAGGC	62
SKN7_TP2_par_P3H1_A1_D1_GS6	SKN7	par	YPD_to_Low_N	TP2	60	low N	SKN7.YPD_to_Low_N.60	P3H1	A1	D1	GS6	CATGAAC	49
SUM1_TP1_hyb_H2_H4_C8_GS3	SUM1	hyb	YPD_to_Low_N	TP1	0	YPD	SUM1.YPD_to_Low_N.0	H2	H4	C8	GS3	TGACGGA	80
SWI4_TP3_par_remnants2_G6_E7_GS13	SWI4	par	YPD_to_Low_N	TP3	960	low N	SWI4.YPD_to_Low_N.960	remnants2	G6	E7	GS13	CTGTGAG	34
MBP1_TP2_hyb_H2_C1_C1_GS4	MBP1	hyb	YPD_to_Low_N	TP2	60	low N	MBP1.YPD_to_Low_N.60	H2	C1	C1	GS4	ACACGTG	3
WT_TP3_cer_C3_B3_G6_GS8	WT	cer	YPD_to_Low_N	TP3	960	low N	WT.YPD_to_Low_N.960	C3	B3	G6	GS8	CAATCGA	66
INO2_TP2_cer_C3_C4_A11_GS8	INO2	cer	YPD_to_Low_N	TP2	60	low N	INO2.YPD_to_Low_N.60	C3	C4	A11	GS8	GCTGAAT	27
RGT1_TP3_par_P2_F2_F4_GS5	RGT1	par	YPD_to_Low_N	TP3	960	low N	RGT1.YPD_to_Low_N.960	P2	F2	F4	GS5	GCTTAGA	70
INO4_TP1_cer_C1_G5_B11_GS1	INO4	cer	YPD_to_Low_N	TP1	0	YPD	INO4.YPD_to_Low_N.0	C1	G5	B11	GS1	CTAAGCG	39
MBP1_TP2_cer_C1_B4_C7_GS1	MBP1	cer	YPD_to_Low_N	TP2	60	low N	MBP1.YPD_to_Low_N.60	C1	B4	C7	GS1	GACACTG	74
WT_TP3_cer_C3_C3_G6_GS8	WT	cer	YPD_to_Low_N	TP3	960	low N	WT.YPD_to_Low_N.960	C3	C3	G6	GS8	TTGCAGA	67
BAS1_TP3_cer_slow_B1_G3_GS11	BAS1	cer	YPD_to_Low_N	TP3	960	low N	BAS1.YPD_to_Low_N.960	slow	B1	G3	GS11	TACTAGC	50
HAP2_TP2_hyb_H3_E1_H5_GS12	HAP2	hyb	YPD_to_Low_N	TP2	60	low N	HAP2.YPD_to_Low_N.60	H3	E1	H5	GS12	ATGCCAA	37
MET28_TP2_hyb_H3_H4_D12_GS12	MET28	hyb	YPD_to_Low_N	TP2	60	low N	MET28.YPD_to_Low_N.60	H3	H4	D12	GS12	CTACAGC	56
URE2_TP1_par_P3H1_B4_G7_GS6	URE2	par	YPD_to_Low_N	TP1	0	YPD	URE2.YPD_to_Low_N.0	P3H1	B4	G7	GS6	GGCGATT	26
URE2_TP3_cer_C1_D1_G1_GS3	URE2	cer	YPD_to_Low_N	TP3	960	low N	URE2.YPD_to_Low_N.960	C1	D1	G1	GS3	TCTTCGA	4
MSN2_TP1_cer_C1_B5_F8_GS1	MSN2	cer	YPD_to_Low_N	TP1	0	YPD	MSN2.YPD_to_Low_N.0	C1	B5	F8	GS1	CTGTGAG	34
ZAP1_TP3_par_remnants_A5_D3_GS11	ZAP1	par	YPD_to_Low_N	TP3	960	low N	ZAP1.YPD_to_Low_N.960	remnants	A5	D3	GS11	ACCGATC	68
AFT1_TP1_hyb_P3H1_C6_H10_GS6	AFT1	hyb	YPD_to_Low_N	TP1	0	YPD	AFT1.YPD_to_Low_N.0	P3H1	C6	H10	GS6	GTGCTAT	43
FKH1_TP3_par_P2_B4_B7_GS5	FKH1	par	YPD_to_Low_N	TP3	960	low N	FKH1.YPD_to_Low_N.960	P2	B4	B7	GS5	ATCAGGC	75
DAL80_TP1_par_P1_G2_E5_GS2	DAL80	par	YPD_to_Low_N	TP1	0	YPD	DAL80.YPD_to_Low_N.0	P1	G2	E5	GS2	ATCTGCA	10
RGT1_TP2_par_P1_F2_F4_GS2	RGT1	par	YPD_to_Low_N	TP2	60	low N	RGT1.YPD_to_Low_N.60	P1	F2	F4	GS2	CGCTTGA	41
GZF3_TP2_cer_C1_H2_D5_GS1	GZF3	cer	YPD_to_Low_N	TP2	60	low N	GZF3.YPD_to_Low_N.60	C1	H2	D5	GS1	TCACAAG	64
HAP2_TP2_hyb_H3_D4_H11_GS12	HAP2	hyb	YPD_to_Low_N	TP2	60	low N	HAP2.YPD_to_Low_N.60	H3	D4	H11	GS12	GTGCTAT	43
FKH1_TP2_cer_C1_A1_B1_GS1	FKH1	cer	YPD_to_Low_N	TP2	60	low N	FKH1.YPD_to_Low_N.60	C1	A1	B1	GS1	CATGAAC	49
WT_TP3_par_P1_G6_G12_GS2	WT	par	YPD_to_Low_N	TP3	960	low N	WT.YPD_to_Low_N.960	P1	G6	G12	GS2	CGTCAGA	92
WT_TP1_cer_C3_B3_G6_GS7	WT	cer	YPD_to_Low_N	TP1	0	YPD	WT.YPD_to_Low_N.0	C3	B3	G6	GS7	CAATCGA	66
HAP5_TP2_par_P5_G4_C12_GS13	HAP5	par	YPD_to_Low_N	TP2	60	low N	HAP5.YPD_to_Low_N.60	P5	G4	C12	GS13	ACGCTAT	78
ARG81_TP3_hyb_H2_E5_F9_GS4	ARG81	hyb	YPD_to_Low_N	TP3	960	low N	ARG81.YPD_to_Low_N.960	H2	E5	F9	GS4	TGCCTAA	85
RIM101_TP2_hyb_H2_D5_H8_GS4	RIM101	hyb	YPD_to_Low_N	TP2	60	low N	RIM101.YPD_to_Low_N.60	H2	D5	H8	GS4	CTTGCAG	36
GCR2_TP1_cer_P4C2_A5_G10_GS9a	GCR2	cer	YPD_to_Low_N	TP1	0	YPD	GCR2.YPD_to_Low_N.0	P4C2	A5	G10	GS9a	TTCAAGC	33
HAP2_TP3_par_P2_A6_H11_GS5	HAP2	par	YPD_to_Low_N	TP3	960	low N	HAP2.YPD_to_Low_N.960	P2	A6	H11	GS5	AACTCGT	88
RPN4_TP1_par_P5_C4_G5_GS13	RPN4	par	YPD_to_Low_N	TP1	0	YPD	RPN4.YPD_to_Low_N.0	P5	C4	G5	GS13	GCTGAAT	27
YAP1_TP1_cer_P4C2_D4_C9_GS9a	YAP1	cer	YPD_to_Low_N	TP1	0	YPD	YAP1.YPD_to_Low_N.0	P4C2	D4	C9	GS9a	GAATAGC	28
HAP5_TP3_par_P5_E1_C6_GS14	HAP5	par	YPD_to_Low_N	TP3	960	low N	HAP5.YPD_to_Low_N.960	P5	E1	C6	GS14	AGCACTG	5
RIM101_TP3_cer_C1_C2_H2_GS3	RIM101	cer	YPD_to_Low_N	TP3	960	low N	RIM101.YPD_to_Low_N.960	C1	C2	H2	GS3	GCAGTAG	11
PHD1_TP1_cer_C1_E4_H7_GS1	PHD1	cer	YPD_to_Low_N	TP1	0	YPD	PHD1.YPD_to_Low_N.0	C1	E4	H7	GS1	ACTGCAG	29
ARG81_TP3_cer_C1_E2_F3_GS3	ARG81	cer	YPD_to_Low_N	TP3	960	low N	ARG81.YPD_to_Low_N.960	C1	E2	F3	GS3	TGCACAA	13
WT_TP2_par_P5_E2_G6_GS13	WT	par	YPD_to_Low_N	TP2	60	low N	WT.YPD_to_Low_N.60	P5	E2	G6	GS13	TCGAAGG	61
TEC1_TP1_hyb_H2_A5_D8_GS3	TEC1	hyb	YPD_to_Low_N	TP1	0	YPD	TEC1.YPD_to_Low_N.0	H2	A5	D8	GS3	GCTTCAT	81
RTG3_TP3_par_P1_D3_F6_GS2	RTG3	par	YPD_to_Low_N	TP3	960	low N	RTG3.YPD_to_Low_N.960	P1	D3	F6	GS2	ACGCTAT	78
MIG1_TP3_par_P1_D2_D4_GS2	MIG1	par	YPD_to_Low_N	TP3	960	low N	MIG1.YPD_to_Low_N.960	P1	D2	D4	GS2	TACGAGG	71
WT_TP1_cer_C3_H5_G12_GS7	WT	cer	YPD_to_Low_N	TP1	0	YPD	WT.YPD_to_Low_N.0	C3	H5	G12	GS7	AACTCGT	88
YAP1_TP1_hyb_P3H1_G2_C3_GS6	YAP1	hyb	YPD_to_Low_N	TP1	0	YPD	YAP1.YPD_to_Low_N.0	P3H1	G2	C3	GS6	AGCTCAA	15
WT_TP1_cer_C3_F6_G12_GS7	WT	cer	YPD_to_Low_N	TP1	0	YPD	WT.YPD_to_Low_N.0	C3	F6	G12	GS7	CCATGGT	94
GZF3_TP1_hyb_H2_A6_D11_GS3	GZF3	hyb	YPD_to_Low_N	TP1	0	YPD	GZF3.YPD_to_Low_N.0	H2	A6	D11	GS3	CCTGATG	89
GZF3_TP3_par_P4C2_C6_D11_GS10	GZF3	par	YPD_to_Low_N	TP3	960	low N	GZF3.YPD_to_Low_N.960	P4C2	C6	D11	GS10	GTGCTAT	43
WT_TP3_par_P5_H2_G6_GS14	WT	par	YPD_to_Low_N	TP3	960	low N	WT.YPD_to_Low_N.960	P5	H2	G6	GS14	ATAACCG	16
GCR2_TP3_par_remnants2_C5_G4_GS13	GCR2	par	YPD_to_Low_N	TP3	960	low N	GCR2.YPD_to_Low_N.960	remnants2	C5	G4	GS13	GAATAGC	28
SWI5_TP3_hyb_slow_E2_F1_GS11	SWI5	hyb	YPD_to_Low_N	TP3	960	low N	SWI5.YPD_to_Low_N.960	slow	E2	F1	GS11	TCGAAGG	61
GZF3_TP1_cer_C1_H2_D5_GS1	GZF3	cer	YPD_to_Low_N	TP1	0	YPD	GZF3.YPD_to_Low_N.0	C1	H2	D5	GS1	ATAACCG	16
GCR2_TP1_cer_P4C2_A2_G4_GS9a	GCR2	cer	YPD_to_Low_N	TP1	0	YPD	GCR2.YPD_to_Low_N.0	P4C2	A2	G4	GS9a	GTATGCG	9
WT_TP1_par_P5_G3_G6_GS13	WT	par	YPD_to_Low_N	TP1	0	YPD	WT.YPD_to_Low_N.0	P5	G3	G6	GS13	ACTTGGC	23
RFX1_TP1_par_P2_G5_G8_GS5	RFX1	par	YPD_to_Low_N	TP1	0	YPD	RFX1.YPD_to_Low_N.0	P2	G5	G8	GS5	AGCTAGT	22
MET28_TP3_cer_remnants_G4_D6_GS11	MET28	cer	YPD_to_Low_N	TP3	960	low N	MET28.YPD_to_Low_N.960	remnants	G4	D6	GS11	CGCTACA	53
ARG81_TP1_hyb_H2_E5_F9_GS3	ARG81	hyb	YPD_to_Low_N	TP1	0	YPD	ARG81.YPD_to_Low_N.0	H2	E5	F9	GS3	TGCCTAA	85
WT_TP2_par_P1_F6_G12_GS2	WT	par	YPD_to_Low_N	TP2	60	low N	WT.YPD_to_Low_N.60	P1	F6	G12	GS2	TTGCCAG	59
BAS1_TP3_cer_slow_B4_G9_GS11	BAS1	cer	YPD_to_Low_N	TP3	960	low N	BAS1.YPD_to_Low_N.960	slow	B4	G9	GS11	GACACTG	74
ARG81_TP1_hyb_H2_E2_F3_GS3	ARG81	hyb	YPD_to_Low_N	TP1	0	YPD	ARG81.YPD_to_Low_N.0	H2	E2	F3	GS3	TCGAAGG	61
LEU3_TP1_hyb_H2_F5_B10_GS3	LEU3	hyb	YPD_to_Low_N	TP1	0	YPD	LEU3.YPD_to_Low_N.0	H2	F5	B10	GS3	CCTGACT	86
CBF1_TP2_cer_slow_C4_H9_GS11	CBF1	cer	YPD_to_Low_N	TP2	60	low N	CBF1.YPD_to_Low_N.60	slow	C4	H9	GS11	GCTGAAT	27
WT_TP3_par_remnants2_F5_G6_GS13	WT	par	YPD_to_Low_N	TP3	960	low N	WT.YPD_to_Low_N.960	remnants2	F5	G6	GS13	GGCTAGA	58
SWI4_TP3_hyb_slow_D2_E1_GS11	SWI4	hyb	YPD_to_Low_N	TP3	960	low N	SWI4.YPD_to_Low_N.960	slow	D2	E1	GS11	CGTTGAA	60
WT_TP1_hyb_H2_F6_G12_GS3	WT	hyb	YPD_to_Low_N	TP1	0	YPD	WT.YPD_to_Low_N.0	H2	F6	G12	GS3	TCGACTC	93
GLN3_TP3_hyb_remnants_B6_C5_GS11	GLN3	hyb	YPD_to_Low_N	TP3	960	low N	GLN3.YPD_to_Low_N.960	remnants	B6	C5	GS11	AACGGTG	72
HAP5_TP1_cer_C3_E2_C6_GS7	HAP5	cer	YPD_to_Low_N	TP1	0	YPD	HAP5.YPD_to_Low_N.0	C3	E2	C6	GS7	TCGAAGG	61
YAP1_TP2_par_remnants2_G4_C3_GS8	YAP1	par	YPD_to_Low_N	TP2	60	low N	YAP1.YPD_to_Low_N.60	remnants2	G4	C3	GS8	TAGCGCA	24
TEC1_TP3_hyb_H2_A2_D2_GS4	TEC1	hyb	YPD_to_Low_N	TP3	960	low N	TEC1.YPD_to_Low_N.960	H2	A2	D2	GS4	CTTAGTG	57
GCR2_TP1_par_remnants2_F4_G10_GS7	GCR2	par	YPD_to_Low_N	TP1	0	YPD	GCR2.YPD_to_Low_N.0	remnants2	F4	G10	GS7	AACGGTG	72
GCR2_TP1_par_remnants2_A5_G4_GS7	GCR2	par	YPD_to_Low_N	TP1	0	YPD	GCR2.YPD_to_Low_N.0	remnants2	A5	G4	GS7	TAGCGCA	24
PHD1_TP3_hyb_H2_F4_H7_GS4	PHD1	hyb	YPD_to_Low_N	TP3	960	low N	PHD1.YPD_to_Low_N.960	H2	F4	H7	GS4	ACGCTAT	78
RPN4_TP2_par_P5_D1_G11_GS13	RPN4	par	YPD_to_Low_N	TP2	60	low N	RPN4.YPD_to_Low_N.60	P5	D1	G11	GS13	AGGCGTT	52
WT_TP2_par_P5_C3_G6_GS13	WT	par	YPD_to_Low_N	TP2	60	low N	WT.YPD_to_Low_N.60	P5	C3	G6	GS13	TTGCAGA	67
HAP3_TP2_cer_H3_G6_A12_GS12	HAP3	cer	YPD_to_Low_N	TP2	60	low N	HAP3.YPD_to_Low_N.60	H3	G6	A12	GS12	TATAGGC	62
HAP4_TP2_hyb_H3_G1_B6_GS12	HAP4	hyb	YPD_to_Low_N	TP2	60	low N	HAP4.YPD_to_Low_N.60	H3	G1	B6	GS12	CTAAGCG	39
DAL80_TP2_par_P1_G5_E11_GS2	DAL80	par	YPD_to_Low_N	TP2	60	low N	DAL80.YPD_to_Low_N.60	P1	G5	E11	GS2	AAGCCTT	55
URE2_TP1_hyb_H2_E1_G1_GS3	URE2	hyb	YPD_to_Low_N	TP1	0	YPD	URE2.YPD_to_Low_N.0	H2	E1	G1	GS3	CGCTACA	53
URE2_TP1_cer_C1_D4_G7_GS1	URE2	cer	YPD_to_Low_N	TP1	0	YPD	URE2.YPD_to_Low_N.0	C1	D4	G7	GS1	GAATAGC	28
WT_TP1_cer_C3_E6_G12_GS7	WT	cer	YPD_to_Low_N	TP1	0	YPD	WT.YPD_to_Low_N.0	C3	E6	G12	GS7	TCGACTC	93
TEC1_TP2_cer_C1_H1_D2_GS1	TEC1	cer	YPD_to_Low_N	TP2	60	low N	TEC1.YPD_to_Low_N.60	C1	H1	D2	GS1	CTACAGC	56
INO2_TP1_par_slow_G1_A5_GS10	INO2	par	YPD_to_Low_N	TP1	0	YPD	INO2.YPD_to_Low_N.0	slow	G1	A5	GS10	AAGCCTT	55
ACE2_TP2_hyb_H2_A4_A7_GS4	ACE2	hyb	YPD_to_Low_N	TP2	60	low N	ACE2.YPD_to_Low_N.60	H2	A4	A7	GS4	CCTAAGG	25
WT_TP1_par_remnants2_F5_G6_GS7	WT	par	YPD_to_Low_N	TP1	0	YPD	WT.YPD_to_Low_N.0	remnants2	F5	G6	GS7	CACAGAT	90
WT_TP2_cer_C3_A3_G6_GS8	WT	cer	YPD_to_Low_N	TP2	60	low N	WT.YPD_to_Low_N.60	C3	A3	G6	GS8	TGTCACG	17
ROX1_TP1_hyb_P3H1_E5_A9_GS6	ROX1	hyb	YPD_to_Low_N	TP1	0	YPD	ROX1.YPD_to_Low_N.0	P3H1	E5	A9	GS6	ATGCCAA	37
PHO4_TP1_cer_C1_A6_F11_GS1	PHO4	cer	YPD_to_Low_N	TP1	0	YPD	PHO4.YPD_to_Low_N.0	C1	A6	F11	GS1	CGCTTGA	41
WT_TP3_cer_C1_E6_G12_GS3	WT	cer	YPD_to_Low_N	TP3	960	low N	WT.YPD_to_Low_N.960	C1	E6	G12	GS3	CTACGTA	45
INO4_TP3_par_P4C2_A3_B5_GS10	INO4	par	YPD_to_Low_N	TP3	960	low N	INO4.YPD_to_Low_N.960	P4C2	A3	B5	GS10	TGTCACG	17
GCN4_TP3_hyb_P3H1_A6_A10_GS7	GCN4	hyb	YPD_to_Low_N	TP3	960	low N	GCN4.YPD_to_Low_N.960	P3H1	A6	A10	GS7	CGCTTGA	41
HAP3_TP1_par_P1_B6_A12_GS2	HAP3	par	YPD_to_Low_N	TP1	0	YPD	HAP3.YPD_to_Low_N.0	P1	B6	A12	GS2	GGCGATT	26
RTG1_TP1_par_P2_C3_E6_GS5	RTG1	par	YPD_to_Low_N	TP1	0	YPD	RTG1.YPD_to_Low_N.0	P2	C3	E6	GS5	GTATGCG	9
SWI5_TP3_cer_C1_C4_F7_GS3	SWI5	cer	YPD_to_Low_N	TP3	960	low N	SWI5.YPD_to_Low_N.960	C1	C4	F7	GS3	GCTGAAT	27
HAP5_TP3_par_P4C2_F3_C6_GS10	HAP5	par	YPD_to_Low_N	TP3	960	low N	HAP5.YPD_to_Low_N.960	P4C2	F3	C6	GS10	AGCTAGT	22
RGT1_TP1_par_P1_F2_F4_GS2	RGT1	par	YPD_to_Low_N	TP1	0	YPD	RGT1.YPD_to_Low_N.0	P1	F2	F4	GS2	GTATGCG	9
WT_TP2_cer_C3_F5_G12_GS8	WT	cer	YPD_to_Low_N	TP2	60	low N	WT.YPD_to_Low_N.60	C3	F5	G12	GS8	CATGCTG	38
PHO4_TP2_par_P1_H2_F5_GS2	PHO4	par	YPD_to_Low_N	TP2	60	low N	PHO4.YPD_to_Low_N.60	P1	H2	F5	GS2	GTGCTAT	43
WT_TP3_par_P5_E5_G12_GS14	WT	par	YPD_to_Low_N	TP3	960	low N	WT.YPD_to_Low_N.960	P5	E5	G12	GS14	ATGCCAA	37
HAP2_TP3_par_P1_A6_H11_GS2	HAP2	par	YPD_to_Low_N	TP3	960	low N	HAP2.YPD_to_Low_N.960	P1	A6	H11	GS2	CCTGATG	89
GZF3_TP1_hyb_H2_A3_D5_GS3	GZF3	hyb	YPD_to_Low_N	TP1	0	YPD	GZF3.YPD_to_Low_N.0	H2	A3	D5	GS3	TGGAGCA	65
STB5_TP1_par_P4C2_G2_B3_GS9a	STB5	par	YPD_to_Low_N	TP1	0	YPD	STB5.YPD_to_Low_N.0	P4C2	G2	B3	GS9a	AGCTCAA	15
RGT1_TP1_cer_C1_F2_F4_GS1	RGT1	cer	YPD_to_Low_N	TP1	0	YPD	RGT1.YPD_to_Low_N.0	C1	F2	F4	GS1	CGTAACT	14
HAP4_TP3_hyb_H3_G4_B12_GS12	HAP4	hyb	YPD_to_Low_N	TP3	960	low N	HAP4.YPD_to_Low_N.960	H3	G4	B12	GS12	CAGTCAA	84
GCR2_TP2_par_remnants2_E5_G4_GS8	GCR2	par	YPD_to_Low_N	TP2	60	low N	GCR2.YPD_to_Low_N.60	remnants2	E5	G4	GS8	GATCACA	42
YAP1_TP2_cer_P4C2_D1_C3_GS9b	YAP1	cer	YPD_to_Low_N	TP2	60	low N	YAP1.YPD_to_Low_N.60	P4C2	D1	C3	GS9b	AGGCGTT	52
INO2_TP3_hyb_P3H1_D6_A11_GS7	INO2	hyb	YPD_to_Low_N	TP3	960	low N	INO2.YPD_to_Low_N.960	P3H1	D6	A11	GS7	AGGCTAG	44
GCN4_TP3_par_P2_C5_A10_GS5	GCN4	par	YPD_to_Low_N	TP3	960	low N	GCN4.YPD_to_Low_N.960	P2	C5	A10	GS5	GGCACTT	82
RPN4_TP2_par_slow_A2_G5_GS11	RPN4	par	YPD_to_Low_N	TP2	60	low N	RPN4.YPD_to_Low_N.60	slow	A2	G5	GS11	GTATGCG	9
WT_TP3_cer_C3_F3_G6_GS8	WT	cer	YPD_to_Low_N	TP3	960	low N	WT.YPD_to_Low_N.960	C3	F3	G6	GS8	GCTTAGA	70
GLN3_TP3_par_P4C2_B3_C5_GS10	GLN3	par	YPD_to_Low_N	TP3	960	low N	GLN3.YPD_to_Low_N.960	P4C2	B3	C5	GS10	TTCCTGA	18
SOK2_TP3_cer_C1_F1_A2_GS3	SOK2	cer	YPD_to_Low_N	TP3	960	low N	SOK2.YPD_to_Low_N.960	C1	F1	A2	GS3	AGTGCGT	6
HAP5_TP2_par_P5_E1_C6_GS13	HAP5	par	YPD_to_Low_N	TP2	60	low N	HAP5.YPD_to_Low_N.60	P5	E1	C6	GS13	CGCTACA	53
HAP5_TP1_par_P5_G1_C12_GS13	HAP5	par	YPD_to_Low_N	TP1	0	YPD	HAP5.YPD_to_Low_N.0	P5	G1	C12	GS13	AACGTTC	7
SOK2_TP3_hyb_P3H1_C5_A8_GS7	SOK2	hyb	YPD_to_Low_N	TP3	960	low N	SOK2.YPD_to_Low_N.960	P3H1	C5	A8	GS7	CTAGTGC	35
RFX1_TP2_hyb_H2_C2_G2_GS4	RFX1	hyb	YPD_to_Low_N	TP2	60	low N	RFX1.YPD_to_Low_N.60	H2	C2	G2	GS4	GCAGTAG	11
HAP2_TP2_hyb_H3_E4_H11_GS12	HAP2	hyb	YPD_to_Low_N	TP2	60	low N	HAP2.YPD_to_Low_N.60	H3	E4	H11	GS12	AGGCTAG	44
RIM101_TP1_par_P2_H4_H8_GS5	RIM101	par	YPD_to_Low_N	TP1	0	YPD	RIM101.YPD_to_Low_N.0	P2	H4	H8	GS5	AGCTCAA	15
ROX1_TP3_cer_C1_D5_A9_GS3	ROX1	cer	YPD_to_Low_N	TP3	960	low N	ROX1.YPD_to_Low_N.960	C1	D5	A9	GS3	CTTGCAG	36
MIG1_TP2_par_P2_D2_D4_GS5	MIG1	par	YPD_to_Low_N	TP2	60	low N	MIG1.YPD_to_Low_N.60	P2	D2	D4	GS5	ATGCCAA	37
NRG1_TP1_par_P1_E2_E4_GS2	NRG1	par	YPD_to_Low_N	TP1	0	YPD	NRG1.YPD_to_Low_N.0	P1	E2	E4	GS2	ATCTGTC	8
URE2_TP1_par_P3H1_B1_G1_GS6	URE2	par	YPD_to_Low_N	TP1	0	YPD	URE2.YPD_to_Low_N.0	P3H1	B1	G1	GS6	ACTCAGG	2
LEU3_TP3_cer_C3_A5_B10_GS8	LEU3	cer	YPD_to_Low_N	TP3	960	low N	LEU3.YPD_to_Low_N.960	C3	A5	B10	GS8	GCTTCAT	81
SOK2_TP2_par_P3H1_D4_A8_GS6	SOK2	par	YPD_to_Low_N	TP2	60	low N	SOK2.YPD_to_Low_N.60	P3H1	D4	A8	GS6	CGGATTA	76
SWI4_TP1_cer_P4C2_A1_E1_GS9a	SWI4	cer	YPD_to_Low_N	TP1	0	YPD	SWI4.YPD_to_Low_N.0	P4C2	A1	E1	GS9a	CTATTCG	1
PHD1_TP1_cer_C1_E1_H1_GS1	PHD1	cer	YPD_to_Low_N	TP1	0	YPD	PHD1.YPD_to_Low_N.0	C1	E1	H1	GS1	AGCACTG	5
ROX1_TP2_par_P3H1_G4_A9_GS6	ROX1	par	YPD_to_Low_N	TP2	60	low N	ROX1.YPD_to_Low_N.60	P3H1	G4	A9	GS6	TCGATAC	79
GCR2_TP2_par_remnants2_A5_G4_GS8	GCR2	par	YPD_to_Low_N	TP2	60	low N	GCR2.YPD_to_Low_N.60	remnants2	A5	G4	GS8	CCTAAGG	25
RPN4_TP1_hyb_slow_C3_G5_GS10	RPN4	hyb	YPD_to_Low_N	TP1	0	YPD	RPN4.YPD_to_Low_N.0	slow	C3	G5	GS10	TTGCAGA	67
WT_TP3_cer_C1_G3_G6_GS3	WT	cer	YPD_to_Low_N	TP3	960	low N	WT.YPD_to_Low_N.960	C1	G3	G6	GS3	ACTTGGC	23
RIM101_TP2_cer_C1_C2_H2_GS1	RIM101	cer	YPD_to_Low_N	TP2	60	low N	RIM101.YPD_to_Low_N.60	C1	C2	H2	GS1	TTGCCAG	59
MET28_TP3_par_slow_C2_D6_GS11	MET28	par	YPD_to_Low_N	TP3	960	low N	MET28.YPD_to_Low_N.960	slow	C2	D6	GS11	TTGCCAG	59
GLN3_TP1_hyb_remnants_E3_C11_GS9a	GLN3	hyb	YPD_to_Low_N	TP1	0	YPD	GLN3.YPD_to_Low_N.0	remnants	E3	C11	GS9a	ATAGCGA	46
LEU3_TP1_par_remnants_B5_B4_GS9b	LEU3	par	YPD_to_Low_N	TP1	0	YPD	LEU3.YPD_to_Low_N.0	remnants	B5	B4	GS9b	TCTGGAG	87
RGT1_TP2_cer_C1_F2_F4_GS1	RGT1	cer	YPD_to_Low_N	TP2	60	low N	RGT1.YPD_to_Low_N.60	C1	F2	F4	GS1	TATAGGC	62
HAP1_TP1_par_P5_B1_E2_GS13	HAP1	par	YPD_to_Low_N	TP1	0	YPD	HAP1.YPD_to_Low_N.0	P5	B1	E2	GS13	ACTCAGG	2
GCR2_TP1_par_remnants2_C5_G4_GS7	GCR2	par	YPD_to_Low_N	TP1	0	YPD	GCR2.YPD_to_Low_N.0	remnants2	C5	G4	GS7	ACTGCAG	29
WT_TP3_hyb_H2_E6_G12_GS4	WT	hyb	YPD_to_Low_N	TP3	960	low N	WT.YPD_to_Low_N.960	H2	E6	G12	GS4	TCGACTC	93
WT_TP3_cer_C1_G6_G12_GS3	WT	cer	YPD_to_Low_N	TP3	960	low N	WT.YPD_to_Low_N.960	C1	G6	G12	GS3	GTAGTCT	47
MSN2_TP3_hyb_H2_B2_F2_GS4	MSN2	hyb	YPD_to_Low_N	TP3	960	low N	MSN2.YPD_to_Low_N.960	H2	B2	F2	GS4	GGCTAGA	58
WT_TP3_hyb_H3_B6_G12_GS12	WT	hyb	YPD_to_Low_N	TP3	960	low N	WT.YPD_to_Low_N.960	H3	B6	G12	GS12	CTTCGAA	91
SUM1_TP2_hyb_H2_H1_C2_GS4	SUM1	hyb	YPD_to_Low_N	TP2	60	low N	SUM1.YPD_to_Low_N.60	H2	H1	C2	GS4	ATCTGTC	8
STB5_TP1_par_slow_E4_B9_GS10	STB5	par	YPD_to_Low_N	TP1	0	YPD	STB5.YPD_to_Low_N.0	slow	E4	B9	GS10	TCTCGAA	77
WT_TP1_cer_C3_D6_G12_GS7	WT	cer	YPD_to_Low_N	TP1	0	YPD	WT.YPD_to_Low_N.0	C3	D6	G12	GS7	CGTCAGA	92
CBF1_TP2_par_slow_F3_H3_GS11	CBF1	par	YPD_to_Low_N	TP2	60	low N	CBF1.YPD_to_Low_N.60	slow	F3	H3	GS11	AGCTAGT	22
ACE2_TP2_cer_C3_A1_A1_GS8	ACE2	cer	YPD_to_Low_N	TP2	60	low N	ACE2.YPD_to_Low_N.60	C3	A1	A1	GS8	CTATTCG	1
ARG80_TP3_cer_C3_H4_E9_GS8	ARG80	cer	YPD_to_Low_N	TP3	960	low N	ARG80.YPD_to_Low_N.960	C3	H4	E9	GS8	TGACGGA	80
STB5_TP2_par_P4C2_G2_B3_GS9b	STB5	par	YPD_to_Low_N	TP2	60	low N	STB5.YPD_to_Low_N.60	P4C2	G2	B3	GS9b	AACAGCT	63
SWI5_TP1_cer_C1_C4_F7_GS1	SWI5	cer	YPD_to_Low_N	TP1	0	YPD	SWI5.YPD_to_Low_N.0	C1	C4	F7	GS1	GCTGAAT	27
RTG3_TP3_par_remnants_B1_F12_GS11	RTG3	par	YPD_to_Low_N	TP3	960	low N	RTG3.YPD_to_Low_N.960	remnants	B1	F12	GS11	AGTGCGT	6
MSN2_TP1_hyb_H2_B2_F2_GS3	MSN2	hyb	YPD_to_Low_N	TP1	0	YPD	MSN2.YPD_to_Low_N.0	H2	B2	F2	GS3	GGCTAGA	58
TEC1_TP3_hyb_H2_A5_D8_GS4	TEC1	hyb	YPD_to_Low_N	TP3	960	low N	TEC1.YPD_to_Low_N.960	H2	A5	D8	GS4	GCTTCAT	81
HAP2_TP1_cer_slow_D4_H11_GS10	HAP2	cer	YPD_to_Low_N	TP1	0	YPD	HAP2.YPD_to_Low_N.0	slow	D4	H11	GS10	CGGATTA	76
WT_TP1_par_P5_H2_G6_GS13	WT	par	YPD_to_Low_N	TP1	0	YPD	WT.YPD_to_Low_N.0	P5	H2	G6	GS13	ATAACCG	16
AFT1_TP2_cer_P4C2_B2_H4_GS9b	AFT1	cer	YPD_to_Low_N	TP2	60	low N	AFT1.YPD_to_Low_N.60	P4C2	B2	H4	GS9b	GGCTAGA	58
ACE2_TP2_cer_remnants_F1_A7_GS10	ACE2	cer	YPD_to_Low_N	TP2	60	low N	ACE2.YPD_to_Low_N.60	remnants	F1	A7	GS10	ACTGCAG	29
SWI5_TP1_hyb_slow_E2_F1_GS10	SWI5	hyb	YPD_to_Low_N	TP1	0	YPD	SWI5.YPD_to_Low_N.0	slow	E2	F1	GS10	TCGAAGG	61
HAP4_TP2_hyb_H2_C3_B6_GS4	HAP4	hyb	YPD_to_Low_N	TP2	60	low N	HAP4.YPD_to_Low_N.60	H2	C3	B6	GS4	GGATCTA	19
PHD1_TP3_hyb_H2_F1_H1_GS4	PHD1	hyb	YPD_to_Low_N	TP3	960	low N	PHD1.YPD_to_Low_N.960	H2	F1	H1	GS4	AAGGTAC	54
ZAP1_TP2_par_P2_H5_D9_GS5	ZAP1	par	YPD_to_Low_N	TP2	60	low N	ZAP1.YPD_to_Low_N.60	P2	H5	D9	GS5	AAGCCTT	55
HAP1_TP2_par_P5_B1_E2_GS13	HAP1	par	YPD_to_Low_N	TP2	60	low N	HAP1.YPD_to_Low_N.60	P5	B1	E2	GS13	TACTAGC	50
MIG1_TP3_hyb_P3H1_B6_D10_GS7	MIG1	hyb	YPD_to_Low_N	TP3	960	low N	MIG1.YPD_to_Low_N.960	P3H1	B6	D10	GS7	GATCACA	42
CHA4_TP1_hyb_H3_B1_C4_GS12	CHA4	hyb	YPD_to_Low_N	TP1	0	YPD	CHA4.YPD_to_Low_N.0	H3	B1	C4	GS12	ACTCAGG	2
ARG81_TP3_par_P3H1_H1_F3_GS7	ARG81	par	YPD_to_Low_N	TP3	960	low N	ARG81.YPD_to_Low_N.960	P3H1	H1	F3	GS7	ATCTGTC	8
GCR2_TP1_hyb_slow_A3_G4_GS10	GCR2	hyb	YPD_to_Low_N	TP1	0	YPD	GCR2.YPD_to_Low_N.0	slow	A3	G4	GS10	TGGAGCA	65
ROX1_TP2_hyb_P3H1_E2_A3_GS6	ROX1	hyb	YPD_to_Low_N	TP2	60	low N	ROX1.YPD_to_Low_N.60	P3H1	E2	A3	GS6	TCGAAGG	61
LEU3_TP2_par_P2_E6_B10_GS5	LEU3	par	YPD_to_Low_N	TP2	60	low N	LEU3.YPD_to_Low_N.60	P2	E6	B10	GS5	TTGCCAG	59
MET28_TP1_cer_remnants_G1_D6_GS9a	MET28	cer	YPD_to_Low_N	TP1	0	YPD	MET28.YPD_to_Low_N.0	remnants	G1	D6	GS9a	CTTACGG	30
MIG1_TP1_hyb_P3H1_B3_D4_GS6	MIG1	hyb	YPD_to_Low_N	TP1	0	YPD	MIG1.YPD_to_Low_N.0	P3H1	B3	D4	GS6	TTCCTGA	18
LEU3_TP2_cer_C3_A5_B10_GS8	LEU3	cer	YPD_to_Low_N	TP2	60	low N	LEU3.YPD_to_Low_N.60	C3	A5	B10	GS8	TTCAAGC	33
GLN3_TP3_par_slow_H4_C11_GS11	GLN3	par	YPD_to_Low_N	TP3	960	low N	GLN3.YPD_to_Low_N.960	slow	H4	C11	GS11	TGACGGA	80
FKH1_TP1_cer_C1_A1_B1_GS1	FKH1	cer	YPD_to_Low_N	TP1	0	YPD	FKH1.YPD_to_Low_N.0	C1	A1	B1	GS1	CTATTCG	1
HAP3_TP2_par_P1_B6_A12_GS2	HAP3	par	YPD_to_Low_N	TP2	60	low N	HAP3.YPD_to_Low_N.60	P1	B6	A12	GS2	GGCTAGA	58
SUM1_TP1_par_P4C2_F2_C2_GS9a	SUM1	par	YPD_to_Low_N	TP1	0	YPD	SUM1.YPD_to_Low_N.0	P4C2	F2	C2	GS9a	CGTAACT	14
PHO4_TP3_par_P1_H5_F11_GS2	PHO4	par	YPD_to_Low_N	TP3	960	low N	PHO4.YPD_to_Low_N.960	P1	H5	F11	GS2	AACTCGT	88
GAT1_TP3_cer_C1_G1_B2_GS3	GAT1	cer	YPD_to_Low_N	TP3	960	low N	GAT1.YPD_to_Low_N.960	C1	G1	B2	GS3	AACGTTC	7
ROX1_TP3_cer_C1_D2_A3_GS3	ROX1	cer	YPD_to_Low_N	TP3	960	low N	ROX1.YPD_to_Low_N.960	C1	D2	A3	GS3	CAGTACG	12
WT_TP1_cer_C3_G6_G12_GS7	WT	cer	YPD_to_Low_N	TP1	0	YPD	WT.YPD_to_Low_N.0	C3	G6	G12	GS7	TACGTAC	95
RTG3_TP3_cer_C1_D3_F6_GS3	RTG3	cer	YPD_to_Low_N	TP3	960	low N	RTG3.YPD_to_Low_N.960	C1	D3	F6	GS3	TACCAGT	20
MSN2_TP3_cer_C1_B5_F8_GS3	MSN2	cer	YPD_to_Low_N	TP3	960	low N	MSN2.YPD_to_Low_N.960	C1	B5	F8	GS3	CTGTGAG	34
HAP3_TP3_par_P1_B6_A12_GS2	HAP3	par	YPD_to_Low_N	TP3	960	low N	HAP3.YPD_to_Low_N.960	P1	B6	A12	GS2	CACAGAT	90
HAP5_TP3_par_P5_H4_C12_GS14	HAP5	par	YPD_to_Low_N	TP3	960	low N	HAP5.YPD_to_Low_N.960	P5	H4	C12	GS14	GCCTACA	32
WT_TP3_cer_C1_E3_G6_GS3	WT	cer	YPD_to_Low_N	TP3	960	low N	WT.YPD_to_Low_N.960	C1	E3	G6	GS3	GGAGACT	21
RPN4_TP3_par_P5_C4_G5_GS14	RPN4	par	YPD_to_Low_N	TP3	960	low N	RPN4.YPD_to_Low_N.960	P5	C4	G5	GS14	GCTGAAT	27
WT_TP1_par_remnants2_B5_G6_GS7	WT	par	YPD_to_Low_N	TP1	0	YPD	WT.YPD_to_Low_N.0	remnants2	B5	G6	GS7	AGTCTCC	73
WT_TP2_par_P5_G2_G6_GS13	WT	par	YPD_to_Low_N	TP2	60	low N	WT.YPD_to_Low_N.60	P5	G2	G6	GS13	AACAGCT	63
RIM101_TP2_cer_C1_C5_H8_GS1	RIM101	cer	YPD_to_Low_N	TP2	60	low N	RIM101.YPD_to_Low_N.60	C1	C5	H8	GS1	CGAGTCT	83
GAT1_TP1_par_P2_F4_B8_GS5	GAT1	par	YPD_to_Low_N	TP1	0	YPD	GAT1.YPD_to_Low_N.0	P2	F4	B8	GS5	TGCACAA	13
HAP1_TP2_cer_C1_A5_E8_GS1	HAP1	cer	YPD_to_Low_N	TP2	60	low N	HAP1.YPD_to_Low_N.60	C1	A5	E8	GS1	GCTTCAT	81
GAT1_TP1_hyb_H2_G1_B2_GS3	GAT1	hyb	YPD_to_Low_N	TP1	0	YPD	GAT1.YPD_to_Low_N.0	H2	G1	B2	GS3	AAGCCTT	55
MSN2_TP2_par_P1_G1_F2_GS2	MSN2	par	YPD_to_Low_N	TP2	60	low N	MSN2.YPD_to_Low_N.60	P1	G1	F2	GS2	CTTGCAG	36
CHA4_TP1_cer_C3_B2_C4_GS7	CHA4	cer	YPD_to_Low_N	TP1	0	YPD	CHA4.YPD_to_Low_N.0	C3	B2	C4	GS7	GGCTAGA	58
ARG80_TP1_hyb_P3H1_H2_E3_GS6	ARG80	hyb	YPD_to_Low_N	TP1	0	YPD	ARG80.YPD_to_Low_N.0	P3H1	H2	E3	GS6	ATAACCG	16
SUM1_TP3_cer_P4C2_B4_C8_GS10	SUM1	cer	YPD_to_Low_N	TP3	960	low N	SUM1.YPD_to_Low_N.960	P4C2	B4	C8	GS10	GGCGATT	26
MSN2_TP1_par_P1_G1_F2_GS2	MSN2	par	YPD_to_Low_N	TP1	0	YPD	MSN2.YPD_to_Low_N.0	P1	G1	F2	GS2	TCTTCGA	4
MIG1_TP1_cer_P4C2_G1_D4_GS9a	MIG1	cer	YPD_to_Low_N	TP1	0	YPD	MIG1.YPD_to_Low_N.0	P4C2	G1	D4	GS9a	AACGTTC	7
HAP1_TP2_par_P3H1_F4_E8_GS6	HAP1	par	YPD_to_Low_N	TP2	60	low N	HAP1.YPD_to_Low_N.60	P3H1	F4	E8	GS6	ACGCTAT	78
RPN4_TP3_par_P5_D1_G11_GS14	RPN4	par	YPD_to_Low_N	TP3	960	low N	RPN4.YPD_to_Low_N.960	P5	D1	G11	GS14	TCTTCGA	4
ARG81_TP2_par_P3H1_H1_F3_GS6	ARG81	par	YPD_to_Low_N	TP2	60	low N	ARG81.YPD_to_Low_N.60	P3H1	H1	F3	GS6	CTACAGC	56
NRG1_TP1_par_P1_E5_E10_GS2	NRG1	par	YPD_to_Low_N	TP1	0	YPD	NRG1.YPD_to_Low_N.0	P1	E5	E10	GS2	AGCTAGT	22
CBF1_TP2_cer_P4C2_F1_H3_GS9b	CBF1	cer	YPD_to_Low_N	TP2	60	low N	CBF1.YPD_to_Low_N.60	P4C2	F1	H3	GS9b	AAGGTAC	54
CBF1_TP2_cer_slow_E3_H3_GS11	CBF1	cer	YPD_to_Low_N	TP2	60	low N	CBF1.YPD_to_Low_N.60	slow	E3	H3	GS11	GGAGACT	21
SWI5_TP2_cer_C1_C1_F1_GS1	SWI5	cer	YPD_to_Low_N	TP2	60	low N	SWI5.YPD_to_Low_N.60	C1	C1	F1	GS1	GCAACTA	51
HAP5_TP1_par_slow_B2_C6_GS10	HAP5	par	YPD_to_Low_N	TP1	0	YPD	HAP5.YPD_to_Low_N.0	slow	B2	C6	GS10	GGCTAGA	58
ACE2_TP3_par_remnants2_G1_A1_GS13	ACE2	par	YPD_to_Low_N	TP3	960	low N	ACE2.YPD_to_Low_N.960	remnants2	G1	A1	GS13	AGTGCGT	6
SKN7_TP3_hyb_H2_D4_D7_GS4	SKN7	hyb	YPD_to_Low_N	TP3	960	low N	SKN7.YPD_to_Low_N.960	H2	D4	D7	GS4	CGGATTA	76
HAP2_TP1_par_P2_A6_H11_GS5	HAP2	par	YPD_to_Low_N	TP1	0	YPD	HAP2.YPD_to_Low_N.0	P2	A6	H11	GS5	TAGCGCA	24
RPN4_TP2_cer_C1_B6_G11_GS1	RPN4	cer	YPD_to_Low_N	TP2	60	low N	RPN4.YPD_to_Low_N.60	C1	B6	G11	GS1	CACAGAT	90
PHO4_TP3_par_P1_H2_F5_GS2	PHO4	par	YPD_to_Low_N	TP3	960	low N	PHO4.YPD_to_Low_N.960	P1	H2	F5	GS2	ATCAGGC	75
GLN3_TP3_hyb_remnants_E6_C11_GS11	GLN3	hyb	YPD_to_Low_N	TP3	960	low N	GLN3.YPD_to_Low_N.960	remnants	E6	C11	GS11	GCTTCAT	81
ACE2_TP3_hyb_H2_A1_A1_GS4	ACE2	hyb	YPD_to_Low_N	TP3	960	low N	ACE2.YPD_to_Low_N.960	H2	A1	A1	GS4	CATGAAC	49
WT_TP2_cer_C3_B3_G6_GS8	WT	cer	YPD_to_Low_N	TP2	60	low N	WT.YPD_to_Low_N.60	C3	B3	G6	GS8	TTCCTGA	18
ZAP1_TP2_hyb_remnants_C1_D9_GS10	ZAP1	hyb	YPD_to_Low_N	TP2	60	low N	ZAP1.YPD_to_Low_N.60	remnants	C1	D9	GS10	TAGCGCA	24
SKN7_TP3_hyb_H2_D1_D1_GS4	SKN7	hyb	YPD_to_Low_N	TP3	960	low N	SKN7.YPD_to_Low_N.960	H2	D1	D1	GS4	AGGCGTT	52
HAP2_TP2_cer_P4C2_D2_H5_GS9b	HAP2	cer	YPD_to_Low_N	TP2	60	low N	HAP2.YPD_to_Low_N.60	P4C2	D2	H5	GS9b	CGTTGAA	60
GZF3_TP3_cer_C1_H2_D5_GS3	GZF3	cer	YPD_to_Low_N	TP3	960	low N	GZF3.YPD_to_Low_N.960	C1	H2	D5	GS3	ATAACCG	16
CBF1_TP1_cer_P4C2_F1_H3_GS9a	CBF1	cer	YPD_to_Low_N	TP1	0	YPD	CBF1.YPD_to_Low_N.0	P4C2	F1	H3	GS9a	AGTGCGT	6
RGT1_TP2_hyb_H2_H2_F4_GS4	RGT1	hyb	YPD_to_Low_N	TP2	60	low N	RGT1.YPD_to_Low_N.60	H2	H2	F4	GS4	ATAACCG	16
YAP1_TP3_par_remnants2_G4_C3_GS13	YAP1	par	YPD_to_Low_N	TP3	960	low N	YAP1.YPD_to_Low_N.960	remnants2	G4	C3	GS13	TAGCGCA	24
WT_TP2_hyb_H2_F6_G12_GS4	WT	hyb	YPD_to_Low_N	TP2	60	low N	WT.YPD_to_Low_N.60	H2	F6	G12	GS4	ATAGCGA	46
GCR2_TP3_par_remnants2_F4_G10_GS13	GCR2	par	YPD_to_Low_N	TP3	960	low N	GCR2.YPD_to_Low_N.960	remnants2	F4	G10	GS13	GTGCTAT	43
RIM101_TP3_cer_C1_C5_H8_GS3	RIM101	cer	YPD_to_Low_N	TP3	960	low N	RIM101.YPD_to_Low_N.960	C1	C5	H8	GS3	CTAGTGC	35
WT_TP1_cer_C3_A6_G12_GS7	WT	cer	YPD_to_Low_N	TP1	0	YPD	WT.YPD_to_Low_N.0	C3	A6	G12	GS7	CCTGATG	89
WT_TP3_hyb_H2_F6_G12_GS4	WT	hyb	YPD_to_Low_N	TP3	960	low N	WT.YPD_to_Low_N.960	H2	F6	G12	GS4	CCATGGT	94
RFX1_TP3_hyb_H2_C5_G8_GS4	RFX1	hyb	YPD_to_Low_N	TP3	960	low N	RFX1.YPD_to_Low_N.960	H2	C5	G8	GS4	CGAGTCT	83
LEU3_TP1_par_P2_E6_B10_GS5	LEU3	par	YPD_to_Low_N	TP1	0	YPD	LEU3.YPD_to_Low_N.0	P2	E6	B10	GS5	GCTGAAT	27
WT_TP2_par_P5_H5_G12_GS13	WT	par	YPD_to_Low_N	TP2	60	low N	WT.YPD_to_Low_N.60	P5	H5	G12	GS13	AACTCGT	88
SOK2_TP2_hyb_P3H1_C2_A2_GS6	SOK2	hyb	YPD_to_Low_N	TP2	60	low N	SOK2.YPD_to_Low_N.60	P3H1	C2	A2	GS6	TTGCCAG	59
CHA4_TP3_hyb_remnants_D4_C10_GS11	CHA4	hyb	YPD_to_Low_N	TP3	960	low N	CHA4.YPD_to_Low_N.960	remnants	D4	C10	GS11	CTACAAG	48
WT_TP2_par_remnants2_B5_G6_GS8	WT	par	YPD_to_Low_N	TP2	60	low N	WT.YPD_to_Low_N.60	remnants2	B5	G6	GS8	GACACTG	74
WT_TP1_par_P1_G6_G12_GS2	WT	par	YPD_to_Low_N	TP1	0	YPD	WT.YPD_to_Low_N.0	P1	G6	G12	GS2	GAATAGC	28
SKN7_TP3_cer_C3_E4_D7_GS8	SKN7	cer	YPD_to_Low_N	TP3	960	low N	SKN7.YPD_to_Low_N.960	C3	E4	D7	GS8	TCTCGAA	77
WT_TP1_hyb_H3_B6_G12_GS12	WT	hyb	YPD_to_Low_N	TP1	0	YPD	WT.YPD_to_Low_N.0	H3	B6	G12	GS12	GCTGAAT	27
GLN3_TP1_hyb_remnants_B6_C5_GS9b	GLN3	hyb	YPD_to_Low_N	TP1	0	YPD	GLN3.YPD_to_Low_N.0	remnants	B6	C5	GS9b	AACTCGT	88
SOK2_TP2_par_P3H1_D1_A2_GS6	SOK2	par	YPD_to_Low_N	TP2	60	low N	SOK2.YPD_to_Low_N.60	P3H1	D1	A2	GS6	AGGCGTT	52
WT_TP1_par_P5_C3_G6_GS13	WT	par	YPD_to_Low_N	TP1	0	YPD	WT.YPD_to_Low_N.0	P5	C3	G6	GS13	GGATCTA	19
WT_TP1_cer_C3_C6_G12_GS7	WT	cer	YPD_to_Low_N	TP1	0	YPD	WT.YPD_to_Low_N.0	C3	C6	G12	GS7	CTTCGAA	91
MET28_TP3_cer_remnants_H4_D12_GS11	MET28	cer	YPD_to_Low_N	TP3	960	low N	MET28.YPD_to_Low_N.960	remnants	H4	D12	GS11	AAGGTAC	54
RPN4_TP3_hyb_slow_C3_G5_GS11	RPN4	hyb	YPD_to_Low_N	TP3	960	low N	RPN4.YPD_to_Low_N.960	slow	C3	G5	GS11	TTGCAGA	67
DAL80_TP2_cer_C3_C2_E5_GS8	DAL80	cer	YPD_to_Low_N	TP2	60	low N	DAL80.YPD_to_Low_N.60	C3	C2	E5	GS8	GCAGTAG	11
MET28_TP1_par_P5_A5_D12_GS13	MET28	par	YPD_to_Low_N	TP1	0	YPD	MET28.YPD_to_Low_N.0	P5	A5	D12	GS13	TTCAAGC	33
ROX1_TP1_cer_C1_D5_A9_GS1	ROX1	cer	YPD_to_Low_N	TP1	0	YPD	ROX1.YPD_to_Low_N.0	C1	D5	A9	GS1	CTTGCAG	36
GCN4_TP3_par_P1_C5_A10_GS2	GCN4	par	YPD_to_Low_N	TP3	960	low N	GCN4.YPD_to_Low_N.960	P1	C5	A10	GS2	TGCCTAA	85
AFT1_TP2_par_P3H1_A2_H4_GS6	AFT1	par	YPD_to_Low_N	TP2	60	low N	AFT1.YPD_to_Low_N.60	P3H1	A2	H4	GS6	CTTAGTG	57
MIG1_TP3_par_P2_D2_D4_GS5	MIG1	par	YPD_to_Low_N	TP3	960	low N	MIG1.YPD_to_Low_N.960	P2	D2	D4	GS5	CTGATGG	69
YAP1_TP3_hyb_P3H1_G2_C3_GS7	YAP1	hyb	YPD_to_Low_N	TP3	960	low N	YAP1.YPD_to_Low_N.960	P3H1	G2	C3	GS7	AGCTCAA	15
DAL80_TP1_hyb_H2_B3_E5_GS3	DAL80	hyb	YPD_to_Low_N	TP1	0	YPD	DAL80.YPD_to_Low_N.0	H2	B3	E5	GS3	CAATCGA	66
RPN4_TP1_par_slow_A2_G5_GS10	RPN4	par	YPD_to_Low_N	TP1	0	YPD	RPN4.YPD_to_Low_N.0	slow	A2	G5	GS10	CTTAGTG	57
WT_TP2_par_P5_E5_G12_GS13	WT	par	YPD_to_Low_N	TP2	60	low N	WT.YPD_to_Low_N.60	P5	E5	G12	GS13	TGCCTAA	85
PHO4_TP1_hyb_slow_B6_F11_GS10	PHO4	hyb	YPD_to_Low_N	TP1	0	YPD	PHO4.YPD_to_Low_N.0	slow	B6	F11	GS10	CCTGACT	86
GAT1_TP2_hyb_H2_G4_B8_GS4	GAT1	hyb	YPD_to_Low_N	TP2	60	low N	GAT1.YPD_to_Low_N.60	H2	G4	B8	GS4	CGCATAT	31
AFT1_TP1_cer_P4C2_B5_H10_GS9a	AFT1	cer	YPD_to_Low_N	TP1	0	YPD	AFT1.YPD_to_Low_N.0	P4C2	B5	H10	GS9a	CTGTGAG	34
CHA4_TP2_par_P2_F6_C10_GS5	CHA4	par	YPD_to_Low_N	TP2	60	low N	CHA4.YPD_to_Low_N.60	P2	F6	C10	GS5	CGTTGAA	60
HAP2_TP3_cer_P4C2_D2_H5_GS10	HAP2	cer	YPD_to_Low_N	TP3	960	low N	HAP2.YPD_to_Low_N.960	P4C2	D2	H5	GS10	CAGTACG	12
HAP4_TP3_par_P4C2_E3_B6_GS10	HAP4	par	YPD_to_Low_N	TP3	960	low N	HAP4.YPD_to_Low_N.960	P4C2	E3	B6	GS10	GGAGACT	21
ZAP1_TP2_par_slow_C5_D9_GS11	ZAP1	par	YPD_to_Low_N	TP2	60	low N	ZAP1.YPD_to_Low_N.60	slow	C5	D9	GS11	CTAGTGC	35
CHA4_TP2_hyb_remnants_D1_C10_GS10	CHA4	hyb	YPD_to_Low_N	TP2	60	low N	CHA4.YPD_to_Low_N.60	remnants	D1	C10	GS10	CCTAAGG	25
RTG3_TP1_par_remnants_B1_F12_GS9a	RTG3	par	YPD_to_Low_N	TP1	0	YPD	RTG3.YPD_to_Low_N.0	remnants	B1	F12	GS9a	TACCAGT	20
PHD1_TP3_cer_remnants_A1_H1_GS11	PHD1	cer	YPD_to_Low_N	TP3	960	low N	PHD1.YPD_to_Low_N.960	remnants	A1	H1	GS11	AGCACTG	5
YAP1_TP1_cer_P4C2_D1_C3_GS9a	YAP1	cer	YPD_to_Low_N	TP1	0	YPD	YAP1.YPD_to_Low_N.0	P4C2	D1	C3	GS9a	TCTTCGA	4
WT_TP1_cer_C3_D3_G6_GS7	WT	cer	YPD_to_Low_N	TP1	0	YPD	WT.YPD_to_Low_N.0	C3	D3	G6	GS7	ACCGATC	68
NRG1_TP1_cer_P4C2_H4_E10_GS9a	NRG1	cer	YPD_to_Low_N	TP1	0	YPD	NRG1.YPD_to_Low_N.0	P4C2	H4	E10	GS9a	GCCTACA	32
ACE2_TP1_hyb_H2_A4_A7_GS3	ACE2	hyb	YPD_to_Low_N	TP1	0	YPD	ACE2.YPD_to_Low_N.0	H2	A4	A7	GS3	AGTCTCC	73
MSN2_TP3_par_P1_G1_F2_GS2	MSN2	par	YPD_to_Low_N	TP3	960	low N	MSN2.YPD_to_Low_N.960	P1	G1	F2	GS2	ACCGATC	68
CHA4_TP2_par_P2_F3_C4_GS5	CHA4	par	YPD_to_Low_N	TP2	60	low N	CHA4.YPD_to_Low_N.60	P2	F3	C4	GS5	GATCACA	42
FKH1_TP3_hyb_H2_B1_B1_GS4	FKH1	hyb	YPD_to_Low_N	TP3	960	low N	FKH1.YPD_to_Low_N.960	H2	B1	B1	GS4	TACTAGC	50
ARG81_TP3_cer_C1_E5_F9_GS3	ARG81	cer	YPD_to_Low_N	TP3	960	low N	ARG81.YPD_to_Low_N.960	C1	E5	F9	GS3	ATGCCAA	37
RFX1_TP3_par_remnants2_G3_G2_GS13	RFX1	par	YPD_to_Low_N	TP3	960	low N	RFX1.YPD_to_Low_N.960	remnants2	G3	G2	GS13	GCAGTAG	11
WT_TP1_par_P5_E6_G12_GS13	WT	par	YPD_to_Low_N	TP1	0	YPD	WT.YPD_to_Low_N.0	P5	E6	G12	GS13	CTACGTA	45
MET28_TP3_hyb_H3_H4_D12_GS12	MET28	hyb	YPD_to_Low_N	TP3	960	low N	MET28.YPD_to_Low_N.960	H3	H4	D12	GS12	AACTCGT	88
CBF1_TP1_hyb_slow_H2_H3_GS10	CBF1	hyb	YPD_to_Low_N	TP1	0	YPD	CBF1.YPD_to_Low_N.0	slow	H2	H3	GS10	TCACAAG	64
RPN4_TP2_hyb_slow_C3_G5_GS11	RPN4	hyb	YPD_to_Low_N	TP2	60	low N	RPN4.YPD_to_Low_N.60	slow	C3	G5	GS11	GGATCTA	19
RFX1_TP2_par_P2_G5_G8_GS5	RFX1	par	YPD_to_Low_N	TP2	60	low N	RFX1.YPD_to_Low_N.60	P2	G5	G8	GS5	AAGGTAC	54
MET28_TP2_par_P4C2_G3_D6_GS9b	MET28	par	YPD_to_Low_N	TP2	60	low N	MET28.YPD_to_Low_N.60	P4C2	G3	D6	GS9b	TACGAGG	71
PHD1_TP1_hyb_H2_F4_H7_GS3	PHD1	hyb	YPD_to_Low_N	TP1	0	YPD	PHD1.YPD_to_Low_N.0	H2	F4	H7	GS3	ACGCTAT	78
CHA4_TP2_cer_C3_B2_C4_GS8	CHA4	cer	YPD_to_Low_N	TP2	60	low N	CHA4.YPD_to_Low_N.60	C3	B2	C4	GS8	ATCTGCA	10
HAP5_TP1_par_P5_E1_C6_GS13	HAP5	par	YPD_to_Low_N	TP1	0	YPD	HAP5.YPD_to_Low_N.0	P5	E1	C6	GS13	AGCACTG	5
HAP1_TP3_cer_C1_A2_E2_GS3	HAP1	cer	YPD_to_Low_N	TP3	960	low N	HAP1.YPD_to_Low_N.960	C1	A2	E2	GS3	GTATGCG	9
RPN4_TP1_par_P5_D1_G11_GS13	RPN4	par	YPD_to_Low_N	TP1	0	YPD	RPN4.YPD_to_Low_N.0	P5	D1	G11	GS13	TCTTCGA	4
STB5_TP2_par_P4C2_G5_B9_GS9b	STB5	par	YPD_to_Low_N	TP2	60	low N	STB5.YPD_to_Low_N.60	P4C2	G5	B9	GS9b	CCTGACT	86
WT_TP3_par_P5_G6_G12_GS14	WT	par	YPD_to_Low_N	TP3	960	low N	WT.YPD_to_Low_N.960	P5	G6	G12	GS14	GTAGTCT	47
WT_TP3_cer_C3_H2_G6_GS8	WT	cer	YPD_to_Low_N	TP3	960	low N	WT.YPD_to_Low_N.960	C3	H2	G6	GS8	TCACAAG	64
MIG1_TP1_par_P1_D2_D4_GS2	MIG1	par	YPD_to_Low_N	TP1	0	YPD	MIG1.YPD_to_Low_N.0	P1	D2	D4	GS2	AACGTTC	7
WT_TP3_cer_C1_F6_G12_GS3	WT	cer	YPD_to_Low_N	TP3	960	low N	WT.YPD_to_Low_N.960	C1	F6	G12	GS3	ATAGCGA	46
RPN4_TP1_cer_C1_B3_G5_GS1	RPN4	cer	YPD_to_Low_N	TP1	0	YPD	RPN4.YPD_to_Low_N.0	C1	B3	G5	GS1	TTCCTGA	18
GLN3_TP2_cer_P4C2_C2_C5_GS9b	GLN3	cer	YPD_to_Low_N	TP2	60	low N	GLN3.YPD_to_Low_N.60	P4C2	C2	C5	GS9b	TTGCCAG	59
HAP5_TP1_hyb_P3H1_G3_C6_GS6	HAP5	hyb	YPD_to_Low_N	TP1	0	YPD	HAP5.YPD_to_Low_N.0	P3H1	G3	C6	GS6	ACTTGGC	23
SWI5_TP1_cer_C1_C1_F1_GS1	SWI5	cer	YPD_to_Low_N	TP1	0	YPD	SWI5.YPD_to_Low_N.0	C1	C1	F1	GS1	ACACGTG	3
CBF1_TP1_cer_slow_C1_H3_GS10	CBF1	cer	YPD_to_Low_N	TP1	0	YPD	CBF1.YPD_to_Low_N.0	slow	C1	H3	GS10	GCAACTA	51
STB5_TP3_hyb_slow_F2_B3_GS11	STB5	hyb	YPD_to_Low_N	TP3	960	low N	STB5.YPD_to_Low_N.960	slow	F2	B3	GS11	TATAGGC	62
GAT1_TP3_par_P1_F4_B8_GS2	GAT1	par	YPD_to_Low_N	TP3	960	low N	GAT1.YPD_to_Low_N.960	P1	F4	B8	GS2	GGCACTT	82
WT_TP3_par_P5_G2_G6_GS14	WT	par	YPD_to_Low_N	TP3	960	low N	WT.YPD_to_Low_N.960	P5	G2	G6	GS14	AGCTCAA	15
RTG3_TP2_cer_C1_D3_F6_GS1	RTG3	cer	YPD_to_Low_N	TP2	60	low N	RTG3.YPD_to_Low_N.60	C1	D3	F6	GS1	ACCGATC	68
NRG1_TP3_cer_P4C2_H1_E4_GS10	NRG1	cer	YPD_to_Low_N	TP3	960	low N	NRG1.YPD_to_Low_N.960	P4C2	H1	E4	GS10	ATCTGTC	8
STB5_TP3_cer_P4C2_C1_B3_GS10	STB5	cer	YPD_to_Low_N	TP3	960	low N	STB5.YPD_to_Low_N.960	P4C2	C1	B3	GS10	ACACGTG	3
DAL80_TP1_cer_C3_C2_E5_GS7	DAL80	cer	YPD_to_Low_N	TP1	0	YPD	DAL80.YPD_to_Low_N.0	C3	C2	E5	GS7	TTGCCAG	59
SWI5_TP2_hyb_slow_E2_F1_GS11	SWI5	hyb	YPD_to_Low_N	TP2	60	low N	SWI5.YPD_to_Low_N.60	slow	E2	F1	GS11	TGCACAA	13
BAS1_TP1_par_P2_B2_G3_GS5	BAS1	par	YPD_to_Low_N	TP1	0	YPD	BAS1.YPD_to_Low_N.0	P2	B2	G3	GS5	TCTTCGA	4
INO4_TP1_par_P4C2_A3_B5_GS9a	INO4	par	YPD_to_Low_N	TP1	0	YPD	INO4.YPD_to_Low_N.0	P4C2	A3	B5	GS9a	TGTCACG	17
LEU3_TP1_cer_C3_A2_B4_GS7	LEU3	cer	YPD_to_Low_N	TP1	0	YPD	LEU3.YPD_to_Low_N.0	C3	A2	B4	GS7	CTTAGTG	57
GCN4_TP2_par_P1_C2_A4_GS2	GCN4	par	YPD_to_Low_N	TP2	60	low N	GCN4.YPD_to_Low_N.60	P1	C2	A4	GS2	CATGCTG	38
GAT1_TP2_cer_C1_G1_B2_GS1	GAT1	cer	YPD_to_Low_N	TP2	60	low N	GAT1.YPD_to_Low_N.60	C1	G1	B2	GS1	AAGCCTT	55
GCR2_TP2_cer_P4C2_A2_G4_GS9b	GCR2	cer	YPD_to_Low_N	TP2	60	low N	GCR2.YPD_to_Low_N.60	P4C2	A2	G4	GS9b	CTTAGTG	57
ZAP1_TP3_cer_C3_G4_D9_GS8	ZAP1	cer	YPD_to_Low_N	TP3	960	low N	ZAP1.YPD_to_Low_N.960	C3	G4	D9	GS8	TCGATAC	79
WT_TP1_cer_C3_F3_G6_GS7	WT	cer	YPD_to_Low_N	TP1	0	YPD	WT.YPD_to_Low_N.0	C3	F3	G6	GS7	GCTTAGA	70
LEU3_TP3_cer_C3_A2_B4_GS8	LEU3	cer	YPD_to_Low_N	TP3	960	low N	LEU3.YPD_to_Low_N.960	C3	A2	B4	GS8	CTTAGTG	57
SWI4_TP3_hyb_remnants_D3_E7_GS11	SWI4	hyb	YPD_to_Low_N	TP3	960	low N	SWI4.YPD_to_Low_N.960	remnants	D3	E7	GS11	CATGCTG	38
RGT1_TP1_cer_C1_F5_F10_GS1	RGT1	cer	YPD_to_Low_N	TP1	0	YPD	RGT1.YPD_to_Low_N.0	C1	F5	F10	GS1	CATGCTG	38
WT_TP3_par_P5_E2_G6_GS14	WT	par	YPD_to_Low_N	TP3	960	low N	WT.YPD_to_Low_N.960	P5	E2	G6	GS14	TGCACAA	13
CHA4_TP2_hyb_remnants_D4_C10_GS10	CHA4	hyb	YPD_to_Low_N	TP2	60	low N	CHA4.YPD_to_Low_N.60	remnants	D4	C10	GS10	ACCGATC	68
SUM1_TP2_par_P4C2_F2_C2_GS9b	SUM1	par	YPD_to_Low_N	TP2	60	low N	SUM1.YPD_to_Low_N.60	P4C2	F2	C2	GS9b	TATAGGC	62
GAT1_TP2_par_P2_F4_B8_GS5	GAT1	par	YPD_to_Low_N	TP2	60	low N	GAT1.YPD_to_Low_N.60	P2	F4	B8	GS5	CTACGTA	45
HAP4_TP1_hyb_H3_G1_B6_GS12	HAP4	hyb	YPD_to_Low_N	TP1	0	YPD	HAP4.YPD_to_Low_N.0	H3	G1	B6	GS12	AACGTTC	7
CHA4_TP3_cer_C3_B2_C4_GS8	CHA4	cer	YPD_to_Low_N	TP3	960	low N	CHA4.YPD_to_Low_N.960	C3	B2	C4	GS8	GGCTAGA	58
INO2_TP1_cer_C3_C4_A11_GS7	INO2	cer	YPD_to_Low_N	TP1	0	YPD	INO2.YPD_to_Low_N.0	C3	C4	A11	GS7	ATCAGGC	75
MSN2_TP1_par_P1_G4_F8_GS2	MSN2	par	YPD_to_Low_N	TP1	0	YPD	MSN2.YPD_to_Low_N.0	P1	G4	F8	GS2	GGATCTA	19
ROX1_TP1_par_P3H1_G1_A3_GS6	ROX1	par	YPD_to_Low_N	TP1	0	YPD	ROX1.YPD_to_Low_N.0	P3H1	G1	A3	GS6	AACGTTC	7
HAP5_TP1_hyb_P3H1_G6_C12_GS6	HAP5	hyb	YPD_to_Low_N	TP1	0	YPD	HAP5.YPD_to_Low_N.0	P3H1	G6	C12	GS6	GTAGTCT	47
WT_TP1_cer_C3_G3_G6_GS7	WT	cer	YPD_to_Low_N	TP1	0	YPD	WT.YPD_to_Low_N.0	C3	G3	G6	GS7	TACGAGG	71
URE2_TP3_par_P3H1_B1_G1_GS7	URE2	par	YPD_to_Low_N	TP3	960	low N	URE2.YPD_to_Low_N.960	P3H1	B1	G1	GS7	ACTCAGG	2
GAT1_TP3_hyb_H2_G1_B2_GS4	GAT1	hyb	YPD_to_Low_N	TP3	960	low N	GAT1.YPD_to_Low_N.960	H2	G1	B2	GS4	AAGCCTT	55
RFX1_TP2_par_remnants2_G3_G2_GS8	RFX1	par	YPD_to_Low_N	TP2	60	low N	RFX1.YPD_to_Low_N.60	remnants2	G3	G2	GS8	TCTTCGA	4
STB5_TP1_cer_P4C2_C1_B3_GS9a	STB5	cer	YPD_to_Low_N	TP1	0	YPD	STB5.YPD_to_Low_N.0	P4C2	C1	B3	GS9a	ACACGTG	3
BAS1_TP1_cer_P4C2_E1_G3_GS9a	BAS1	cer	YPD_to_Low_N	TP1	0	YPD	BAS1.YPD_to_Low_N.0	P4C2	E1	G3	GS9a	AGCACTG	5
SKN7_TP3_par_P3H1_A1_D1_GS7	SKN7	par	YPD_to_Low_N	TP3	960	low N	SKN7.YPD_to_Low_N.960	P3H1	A1	D1	GS7	CTATTCG	1
SWI4_TP2_hyb_slow_D2_E1_GS11	SWI4	hyb	YPD_to_Low_N	TP2	60	low N	SWI4.YPD_to_Low_N.60	slow	D2	E1	GS11	CAGTACG	12
HAP5_TP2_hyb_P3H1_G6_C12_GS6	HAP5	hyb	YPD_to_Low_N	TP2	60	low N	HAP5.YPD_to_Low_N.60	P3H1	G6	C12	GS6	TACGTAC	95
WT_TP1_par_P5_A3_G6_GS13	WT	par	YPD_to_Low_N	TP1	0	YPD	WT.YPD_to_Low_N.0	P5	A3	G6	GS13	TGTCACG	17
WT_TP3_cer_C1_F3_G6_GS3	WT	cer	YPD_to_Low_N	TP3	960	low N	WT.YPD_to_Low_N.960	C1	F3	G6	GS3	AGCTAGT	22
HAP1_TP3_hyb_P3H1_D5_E8_GS7	HAP1	hyb	YPD_to_Low_N	TP3	960	low N	HAP1.YPD_to_Low_N.960	P3H1	D5	E8	GS7	CTTGCAG	36
ARG80_TP3_hyb_P3H1_H2_E3_GS7	ARG80	hyb	YPD_to_Low_N	TP3	960	low N	ARG80.YPD_to_Low_N.960	P3H1	H2	E3	GS7	ATAACCG	16
INO4_TP1_par_P4C2_A6_B11_GS9a	INO4	par	YPD_to_Low_N	TP1	0	YPD	INO4.YPD_to_Low_N.0	P4C2	A6	B11	GS9a	CGCTTGA	41
INO2_TP3_par_slow_G1_A5_GS11	INO2	par	YPD_to_Low_N	TP3	960	low N	INO2.YPD_to_Low_N.960	slow	G1	A5	GS11	AAGCCTT	55
RTG3_TP2_hyb_H2_D6_F12_GS4	RTG3	hyb	YPD_to_Low_N	TP2	60	low N	RTG3.YPD_to_Low_N.60	H2	D6	F12	GS4	AGGCTAG	44
MSN2_TP3_par_P2_G4_F8_GS5	MSN2	par	YPD_to_Low_N	TP3	960	low N	MSN2.YPD_to_Low_N.960	P2	G4	F8	GS5	ACGCTAT	78
MET28_TP1_hyb_H3_H1_D6_GS12	MET28	hyb	YPD_to_Low_N	TP1	0	YPD	MET28.YPD_to_Low_N.0	H3	H1	D6	GS12	ATCTGTC	8
WT_TP1_cer_C1_F3_G6_GS1	WT	cer	YPD_to_Low_N	TP1	0	YPD	WT.YPD_to_Low_N.0	C1	F3	G6	GS1	AGCTAGT	22
SWI4_TP1_hyb_slow_D2_E1_GS10	SWI4	hyb	YPD_to_Low_N	TP1	0	YPD	SWI4.YPD_to_Low_N.0	slow	D2	E1	GS10	CGTTGAA	60
WT_TP1_hyb_H3_D5_G12_GS12	WT	hyb	YPD_to_Low_N	TP1	0	YPD	WT.YPD_to_Low_N.0	H3	D5	G12	GS12	GGCGATT	26
WT_TP2_cer_C3_H5_G12_GS8	WT	cer	YPD_to_Low_N	TP2	60	low N	WT.YPD_to_Low_N.60	C3	H5	G12	GS8	AGCCGAT	40
BAS1_TP3_par_P1_B5_G9_GS2	BAS1	par	YPD_to_Low_N	TP3	960	low N	BAS1.YPD_to_Low_N.960	P1	B5	G9	GS2	CAGTCAA	84
WT_TP2_par_remnants2_D5_G6_GS8	WT	par	YPD_to_Low_N	TP2	60	low N	WT.YPD_to_Low_N.60	remnants2	D5	G6	GS8	CACAGAT	90
WT_TP2_cer_C1_E6_G12_GS1	WT	cer	YPD_to_Low_N	TP2	60	low N	WT.YPD_to_Low_N.60	C1	E6	G12	GS1	TCGACTC	93
MSN2_TP2_par_P1_G4_F8_GS2	MSN2	par	YPD_to_Low_N	TP2	60	low N	MSN2.YPD_to_Low_N.60	P1	G4	F8	GS2	GCAACTA	51
GCN4_TP1_cer_H3_E3_A4_GS12	GCN4	cer	YPD_to_Low_N	TP1	0	YPD	GCN4.YPD_to_Low_N.0	H3	E3	A4	GS12	GGAGACT	21
RTG3_TP2_par_P1_D3_F6_GS2	RTG3	par	YPD_to_Low_N	TP2	60	low N	RTG3.YPD_to_Low_N.60	P1	D3	F6	GS2	ATAGCGA	46
WT_TP2_cer_C1_E3_G6_GS1	WT	cer	YPD_to_Low_N	TP2	60	low N	WT.YPD_to_Low_N.60	C1	E3	G6	GS1	CTGATGG	69
WT_TP3_cer_C3_F2_G6_GS8	WT	cer	YPD_to_Low_N	TP3	960	low N	WT.YPD_to_Low_N.960	C3	F2	G6	GS8	TATAGGC	62
NRG1_TP3_hyb_H2_G2_E4_GS4	NRG1	hyb	YPD_to_Low_N	TP3	960	low N	NRG1.YPD_to_Low_N.960	H2	G2	E4	GS4	AACAGCT	63
URE2_TP2_hyb_H2_E1_G1_GS4	URE2	hyb	YPD_to_Low_N	TP2	60	low N	URE2.YPD_to_Low_N.60	H2	E1	G1	GS4	AGCACTG	5
SOK2_TP1_hyb_P3H1_C2_A2_GS6	SOK2	hyb	YPD_to_Low_N	TP1	0	YPD	SOK2.YPD_to_Low_N.0	P3H1	C2	A2	GS6	GCAGTAG	11
GAT1_TP1_par_P1_F4_B8_GS2	GAT1	par	YPD_to_Low_N	TP1	0	YPD	GAT1.YPD_to_Low_N.0	P1	F4	B8	GS2	TTCCTGA	18
ARG81_TP2_hyb_H2_E5_F9_GS4	ARG81	hyb	YPD_to_Low_N	TP2	60	low N	ARG81.YPD_to_Low_N.60	H2	E5	F9	GS4	ATGCCAA	37
GAT1_TP1_cer_C1_G1_B2_GS1	GAT1	cer	YPD_to_Low_N	TP1	0	YPD	GAT1.YPD_to_Low_N.0	C1	G1	B2	GS1	AACGTTC	7
TEC1_TP2_cer_C1_H4_D8_GS1	TEC1	cer	YPD_to_Low_N	TP2	60	low N	TEC1.YPD_to_Low_N.60	C1	H4	D8	GS1	TGACGGA	80
HAP4_TP1_par_P4C2_E3_B6_GS9a	HAP4	par	YPD_to_Low_N	TP1	0	YPD	HAP4.YPD_to_Low_N.0	P4C2	E3	B6	GS9a	GGAGACT	21
DAL80_TP3_par_P1_G2_E5_GS2	DAL80	par	YPD_to_Low_N	TP3	960	low N	DAL80.YPD_to_Low_N.960	P1	G2	E5	GS2	GACACTG	74
SKN7_TP1_cer_C3_E4_D7_GS7	SKN7	cer	YPD_to_Low_N	TP1	0	YPD	SKN7.YPD_to_Low_N.0	C3	E4	D7	GS7	TCTCGAA	77
GZF3_TP3_hyb_H2_A6_D11_GS4	GZF3	hyb	YPD_to_Low_N	TP3	960	low N	GZF3.YPD_to_Low_N.960	H2	A6	D11	GS4	CCTGATG	89
RTG3_TP2_hyb_H2_D3_F6_GS4	RTG3	hyb	YPD_to_Low_N	TP2	60	low N	RTG3.YPD_to_Low_N.60	H2	D3	F6	GS4	TACCAGT	20
WT_TP3_cer_C3_G6_G12_GS8	WT	cer	YPD_to_Low_N	TP3	960	low N	WT.YPD_to_Low_N.960	C3	G6	G12	GS8	TACGTAC	95
SOK2_TP3_par_P3H1_D4_A8_GS7	SOK2	par	YPD_to_Low_N	TP3	960	low N	SOK2.YPD_to_Low_N.960	P3H1	D4	A8	GS7	GAATAGC	28
AFT1_TP3_hyb_P3H1_C3_H4_GS7	AFT1	hyb	YPD_to_Low_N	TP3	960	low N	AFT1.YPD_to_Low_N.960	P3H1	C3	H4	GS7	GGATCTA	19
MBP1_TP3_par_remnants2_G2_C1_GS13	MBP1	par	YPD_to_Low_N	TP3	960	low N	MBP1.YPD_to_Low_N.960	remnants2	G2	C1	GS13	ATCTGCA	10
GCN4_TP2_par_P2_C5_A10_GS5	GCN4	par	YPD_to_Low_N	TP2	60	low N	GCN4.YPD_to_Low_N.60	P2	C5	A10	GS5	TACTAGC	50
INO2_TP2_par_slow_G1_A5_GS11	INO2	par	YPD_to_Low_N	TP2	60	low N	INO2.YPD_to_Low_N.60	slow	G1	A5	GS11	AACGTTC	7
WT_TP3_hyb_H3_C5_G12_GS12	WT	hyb	YPD_to_Low_N	TP3	960	low N	WT.YPD_to_Low_N.960	H3	C5	G12	GS12	CCTGATG	89
ZAP1_TP1_hyb_remnants_C4_D9_GS9b	ZAP1	hyb	YPD_to_Low_N	TP1	0	YPD	ZAP1.YPD_to_Low_N.0	remnants	C4	D9	GS9b	ACCGATC	68
RIM101_TP1_hyb_H2_D5_H8_GS3	RIM101	hyb	YPD_to_Low_N	TP1	0	YPD	RIM101.YPD_to_Low_N.0	H2	D5	H8	GS3	CAGTCAA	84
RTG3_TP3_cer_C1_D6_F12_GS3	RTG3	cer	YPD_to_Low_N	TP3	960	low N	RTG3.YPD_to_Low_N.960	C1	D6	F12	GS3	AGGCTAG	44
RPN4_TP1_hyb_remnants_G6_G11_GS9b	RPN4	hyb	YPD_to_Low_N	TP1	0	YPD	RPN4.YPD_to_Low_N.0	remnants	G6	G11	GS9b	CCATGGT	94
DAL80_TP1_hyb_H2_B6_E11_GS3	DAL80	hyb	YPD_to_Low_N	TP1	0	YPD	DAL80.YPD_to_Low_N.0	H2	B6	E11	GS3	CACAGAT	90
WT_TP1_par_P1_E3_G6_GS2	WT	par	YPD_to_Low_N	TP1	0	YPD	WT.YPD_to_Low_N.0	P1	E3	G6	GS2	AGCTCAA	15
HAP5_TP3_par_P5_G1_C12_GS14	HAP5	par	YPD_to_Low_N	TP3	960	low N	HAP5.YPD_to_Low_N.960	P5	G1	C12	GS14	AACGTTC	7
CBF1_TP2_cer_slow_C1_H3_GS11	CBF1	cer	YPD_to_Low_N	TP2	60	low N	CBF1.YPD_to_Low_N.60	slow	C1	H3	GS11	ACACGTG	3
GLN3_TP3_cer_P4C2_C5_C11_GS10	GLN3	cer	YPD_to_Low_N	TP3	960	low N	GLN3.YPD_to_Low_N.960	P4C2	C5	C11	GS10	CTAGTGC	35
RTG3_TP3_hyb_H2_D6_F12_GS4	RTG3	hyb	YPD_to_Low_N	TP3	960	low N	RTG3.YPD_to_Low_N.960	H2	D6	F12	GS4	CGTCAGA	92
GAT1_TP1_hyb_H2_G4_B8_GS3	GAT1	hyb	YPD_to_Low_N	TP1	0	YPD	GAT1.YPD_to_Low_N.0	H2	G4	B8	GS3	TCGATAC	79
SUM1_TP2_cer_P4C2_B1_C2_GS9b	SUM1	cer	YPD_to_Low_N	TP2	60	low N	SUM1.YPD_to_Low_N.60	P4C2	B1	C2	GS9b	TACTAGC	50
BAS1_TP2_par_P2_B2_G3_GS5	BAS1	par	YPD_to_Low_N	TP2	60	low N	BAS1.YPD_to_Low_N.60	P2	B2	G3	GS5	CTTGCAG	36
MET28_TP1_cer_C1_C3_D6_GS1	MET28	cer	YPD_to_Low_N	TP1	0	YPD	MET28.YPD_to_Low_N.0	C1	C3	D6	GS1	GGATCTA	19
HAP3_TP3_par_P1_B3_A6_GS2	HAP3	par	YPD_to_Low_N	TP3	960	low N	HAP3.YPD_to_Low_N.960	P1	B3	A6	GS2	CGGATTA	76
RGT1_TP1_hyb_H2_H5_F10_GS3	RGT1	hyb	YPD_to_Low_N	TP1	0	YPD	RGT1.YPD_to_Low_N.0	H2	H5	F10	GS3	AACTCGT	88
BAS1_TP2_par_P2_B5_G9_GS5	BAS1	par	YPD_to_Low_N	TP2	60	low N	BAS1.YPD_to_Low_N.60	P2	B5	G9	GS5	CATGAAC	49
SUM1_TP1_cer_P4C2_B1_C2_GS9a	SUM1	cer	YPD_to_Low_N	TP1	0	YPD	SUM1.YPD_to_Low_N.0	P4C2	B1	C2	GS9a	ACTCAGG	2
TEC1_TP3_par_P5_A1_D2_GS14	TEC1	par	YPD_to_Low_N	TP3	960	low N	TEC1.YPD_to_Low_N.960	P5	A1	D2	GS14	CTATTCG	1
WT_TP1_cer_C3_F5_G12_GS7	WT	cer	YPD_to_Low_N	TP1	0	YPD	WT.YPD_to_Low_N.0	C3	F5	G12	GS7	CCTGACT	86
WT_TP1_par_P5_B6_G12_GS13	WT	par	YPD_to_Low_N	TP1	0	YPD	WT.YPD_to_Low_N.0	P5	B6	G12	GS13	GATCACA	42
DAL80_TP1_cer_C3_C5_E11_GS7	DAL80	cer	YPD_to_Low_N	TP1	0	YPD	DAL80.YPD_to_Low_N.0	C3	C5	E11	GS7	CGAGTCT	83
MET28_TP1_cer_remnants_G4_D6_GS9b	MET28	cer	YPD_to_Low_N	TP1	0	YPD	MET28.YPD_to_Low_N.0	remnants	G4	D6	GS9b	AGTCTCC	73
ACE2_TP1_hyb_H2_A1_A1_GS3	ACE2	hyb	YPD_to_Low_N	TP1	0	YPD	ACE2.YPD_to_Low_N.0	H2	A1	A1	GS3	CATGAAC	49
RFX1_TP3_par_P2_G5_G8_GS5	RFX1	par	YPD_to_Low_N	TP3	960	low N	RFX1.YPD_to_Low_N.960	P2	G5	G8	GS5	CCTGACT	86
RIM101_TP3_par_P1_H1_H2_GS2	RIM101	par	YPD_to_Low_N	TP3	960	low N	RIM101.YPD_to_Low_N.960	P1	H1	H2	GS2	CTGATGG	69
WT_TP3_par_P5_D6_G12_GS14	WT	par	YPD_to_Low_N	TP3	960	low N	WT.YPD_to_Low_N.960	P5	D6	G12	GS14	AGGCTAG	44
BAS1_TP2_par_P1_B5_G9_GS2	BAS1	par	YPD_to_Low_N	TP2	60	low N	BAS1.YPD_to_Low_N.60	P1	B5	G9	GS2	AGGCGTT	52
GCR2_TP3_hyb_slow_A3_G4_GS11	GCR2	hyb	YPD_to_Low_N	TP3	960	low N	GCR2.YPD_to_Low_N.960	slow	A3	G4	GS11	TGGAGCA	65
MIG1_TP1_hyb_P3H1_B6_D10_GS6	MIG1	hyb	YPD_to_Low_N	TP1	0	YPD	MIG1.YPD_to_Low_N.0	P3H1	B6	D10	GS6	GATCACA	42
GCN4_TP3_cer_H3_E3_A4_GS12	GCN4	cer	YPD_to_Low_N	TP3	960	low N	GCN4.YPD_to_Low_N.960	H3	E3	A4	GS12	TGCCTAA	85
SOK2_TP3_cer_C1_F4_A8_GS3	SOK2	cer	YPD_to_Low_N	TP3	960	low N	SOK2.YPD_to_Low_N.960	C1	F4	A8	GS3	CTTACGG	30
MIG1_TP3_hyb_P3H1_B3_D4_GS7	MIG1	hyb	YPD_to_Low_N	TP3	960	low N	MIG1.YPD_to_Low_N.960	P3H1	B3	D4	GS7	TTCCTGA	18
DAL80_TP2_cer_C3_C5_E11_GS8	DAL80	cer	YPD_to_Low_N	TP2	60	low N	DAL80.YPD_to_Low_N.60	C3	C5	E11	GS8	CTAGTGC	35
ARG80_TP2_cer_C3_H4_E9_GS8	ARG80	cer	YPD_to_Low_N	TP2	60	low N	ARG80.YPD_to_Low_N.60	C3	H4	E9	GS8	GCCTACA	32
NRG1_TP2_par_P1_E2_E4_GS2	NRG1	par	YPD_to_Low_N	TP2	60	low N	NRG1.YPD_to_Low_N.60	P1	E2	E4	GS2	AGCCGAT	40
FKH1_TP1_hyb_H2_B4_B7_GS3	FKH1	hyb	YPD_to_Low_N	TP1	0	YPD	FKH1.YPD_to_Low_N.0	H2	B4	B7	GS3	GACACTG	74
LEU3_TP2_cer_C3_A2_B4_GS8	LEU3	cer	YPD_to_Low_N	TP2	60	low N	LEU3.YPD_to_Low_N.60	C3	A2	B4	GS8	GTATGCG	9
INO2_TP1_cer_H3_F3_A5_GS12	INO2	cer	YPD_to_Low_N	TP1	0	YPD	INO2.YPD_to_Low_N.0	H3	F3	A5	GS12	AGCTAGT	22
SWI5_TP2_hyb_slow_E5_F7_GS11	SWI5	hyb	YPD_to_Low_N	TP2	60	low N	SWI5.YPD_to_Low_N.60	slow	E5	F7	GS11	ATGCCAA	37
MET28_TP1_hyb_H3_H4_D12_GS12	MET28	hyb	YPD_to_Low_N	TP1	0	YPD	MET28.YPD_to_Low_N.0	H3	H4	D12	GS12	TAGCGCA	24
SWI5_TP2_par_P2_E1_F1_GS5	SWI5	par	YPD_to_Low_N	TP2	60	low N	SWI5.YPD_to_Low_N.60	P2	E1	F1	GS5	TTCAAGC	33
LEU3_TP1_hyb_H2_F2_B4_GS3	LEU3	hyb	YPD_to_Low_N	TP1	0	YPD	LEU3.YPD_to_Low_N.0	H2	F2	B4	GS3	TATAGGC	62
STB5_TP3_par_P4C2_G5_B9_GS10	STB5	par	YPD_to_Low_N	TP3	960	low N	STB5.YPD_to_Low_N.960	P4C2	G5	B9	GS10	CTAAGCG	39
RTG1_TP2_par_P2_C3_E6_GS5	RTG1	par	YPD_to_Low_N	TP2	60	low N	RTG1.YPD_to_Low_N.60	P2	C3	E6	GS5	CGCTTGA	41
LEU3_TP3_hyb_H2_F2_B4_GS4	LEU3	hyb	YPD_to_Low_N	TP3	960	low N	LEU3.YPD_to_Low_N.960	H2	F2	B4	GS4	TATAGGC	62
SWI5_TP3_hyb_slow_E5_F7_GS11	SWI5	hyb	YPD_to_Low_N	TP3	960	low N	SWI5.YPD_to_Low_N.960	slow	E5	F7	GS11	TGCCTAA	85
TEC1_TP1_cer_C1_H4_D8_GS1	TEC1	cer	YPD_to_Low_N	TP1	0	YPD	TEC1.YPD_to_Low_N.0	C1	H4	D8	GS1	GCCTACA	32
MBP1_TP2_par_remnants2_G2_C1_GS8	MBP1	par	YPD_to_Low_N	TP2	60	low N	MBP1.YPD_to_Low_N.60	remnants2	G2	C1	GS8	ACACGTG	3
GAT1_TP3_par_P2_F4_B8_GS5	GAT1	par	YPD_to_Low_N	TP3	960	low N	GAT1.YPD_to_Low_N.960	P2	F4	B8	GS5	TCTCGAA	77
WT_TP2_par_P1_G6_G12_GS2	WT	par	YPD_to_Low_N	TP2	60	low N	WT.YPD_to_Low_N.60	P1	G6	G12	GS2	CGTTGAA	60
PHO4_TP2_hyb_slow_B3_F5_GS11	PHO4	hyb	YPD_to_Low_N	TP2	60	low N	PHO4.YPD_to_Low_N.60	slow	B3	F5	GS11	TTCCTGA	18
WT_TP1_par_P5_F2_G6_GS13	WT	par	YPD_to_Low_N	TP1	0	YPD	WT.YPD_to_Low_N.0	P5	F2	G6	GS13	CGTAACT	14
RTG3_TP3_hyb_H2_D3_F6_GS4	RTG3	hyb	YPD_to_Low_N	TP3	960	low N	RTG3.YPD_to_Low_N.960	H2	D3	F6	GS4	ACCGATC	68
SOK2_TP1_cer_C1_F4_A8_GS1	SOK2	cer	YPD_to_Low_N	TP1	0	YPD	SOK2.YPD_to_Low_N.0	C1	F4	A8	GS1	CTTACGG	30
HAP4_TP2_par_P4C2_E6_B12_GS9b	HAP4	par	YPD_to_Low_N	TP2	60	low N	HAP4.YPD_to_Low_N.60	P4C2	E6	B12	GS9b	TCGACTC	93
MET28_TP3_cer_remnants_G1_D6_GS11	MET28	cer	YPD_to_Low_N	TP3	960	low N	MET28.YPD_to_Low_N.960	remnants	G1	D6	GS11	CTTACGG	30
NRG1_TP3_cer_P4C2_H4_E10_GS10	NRG1	cer	YPD_to_Low_N	TP3	960	low N	NRG1.YPD_to_Low_N.960	P4C2	H4	E10	GS10	GCCTACA	32
RPN4_TP3_hyb_remnants_G3_G11_GS11	RPN4	hyb	YPD_to_Low_N	TP3	960	low N	RPN4.YPD_to_Low_N.960	remnants	G3	G11	GS11	AGGCTAG	44
NRG1_TP2_cer_P4C2_H4_E10_GS9b	NRG1	cer	YPD_to_Low_N	TP2	60	low N	NRG1.YPD_to_Low_N.60	P4C2	H4	E10	GS9b	TGACGGA	80
CHA4_TP1_par_P2_F3_C4_GS5	CHA4	par	YPD_to_Low_N	TP1	0	YPD	CHA4.YPD_to_Low_N.0	P2	F3	C4	GS5	ATCTGCA	10
ARG81_TP2_cer_C1_E5_F9_GS1	ARG81	cer	YPD_to_Low_N	TP2	60	low N	ARG81.YPD_to_Low_N.60	C1	E5	F9	GS1	TGCCTAA	85
ROX1_TP1_hyb_P3H1_E2_A3_GS6	ROX1	hyb	YPD_to_Low_N	TP1	0	YPD	ROX1.YPD_to_Low_N.0	P3H1	E2	A3	GS6	TGCACAA	13
SUM1_TP2_cer_P4C2_B4_C8_GS9b	SUM1	cer	YPD_to_Low_N	TP2	60	low N	SUM1.YPD_to_Low_N.60	P4C2	B4	C8	GS9b	GACACTG	74
MSN2_TP2_cer_C1_B5_F8_GS1	MSN2	cer	YPD_to_Low_N	TP2	60	low N	MSN2.YPD_to_Low_N.60	C1	B5	F8	GS1	GGCACTT	82
PHO4_TP3_cer_C1_A6_F11_GS3	PHO4	cer	YPD_to_Low_N	TP3	960	low N	PHO4.YPD_to_Low_N.960	C1	A6	F11	GS3	CGCTTGA	41
RPN4_TP1_hyb_remnants_G3_G11_GS9a	RPN4	hyb	YPD_to_Low_N	TP1	0	YPD	RPN4.YPD_to_Low_N.0	remnants	G3	G11	GS9a	GTAGTCT	47
MIG1_TP1_par_P2_D2_D4_GS5	MIG1	par	YPD_to_Low_N	TP1	0	YPD	MIG1.YPD_to_Low_N.0	P2	D2	D4	GS5	AGCACTG	5
RIM101_TP1_hyb_H2_D2_H2_GS3	RIM101	hyb	YPD_to_Low_N	TP1	0	YPD	RIM101.YPD_to_Low_N.0	H2	D2	H2	GS3	CGTTGAA	60
HAP1_TP1_cer_C1_A5_E8_GS1	HAP1	cer	YPD_to_Low_N	TP1	0	YPD	HAP1.YPD_to_Low_N.0	C1	A5	E8	GS1	TTCAAGC	33
HAP4_TP3_cer_C3_D2_B6_GS8	HAP4	cer	YPD_to_Low_N	TP3	960	low N	HAP4.YPD_to_Low_N.960	C3	D2	B6	GS8	CGTTGAA	60
SOK2_TP3_par_P3H1_D1_A2_GS7	SOK2	par	YPD_to_Low_N	TP3	960	low N	SOK2.YPD_to_Low_N.960	P3H1	D1	A2	GS7	TCTTCGA	4
GLN3_TP3_hyb_remnants_B3_C5_GS11	GLN3	hyb	YPD_to_Low_N	TP3	960	low N	GLN3.YPD_to_Low_N.960	remnants	B3	C5	GS11	CTGTGAG	34
SWI4_TP1_cer_slow_A4_E7_GS10	SWI4	cer	YPD_to_Low_N	TP1	0	YPD	SWI4.YPD_to_Low_N.0	slow	A4	E7	GS10	AGTCTCC	73
RIM101_TP3_hyb_H2_D5_H8_GS4	RIM101	hyb	YPD_to_Low_N	TP3	960	low N	RIM101.YPD_to_Low_N.960	H2	D5	H8	GS4	CAGTCAA	84
MSN2_TP2_par_P2_G1_F2_GS5	MSN2	par	YPD_to_Low_N	TP2	60	low N	MSN2.YPD_to_Low_N.60	P2	G1	F2	GS5	CTAGTGC	35
NRG1_TP1_cer_P4C2_H1_E4_GS9a	NRG1	cer	YPD_to_Low_N	TP1	0	YPD	NRG1.YPD_to_Low_N.0	P4C2	H1	E4	GS9a	ATCTGTC	8
GLN3_TP2_hyb_remnants_B6_C5_GS10	GLN3	hyb	YPD_to_Low_N	TP2	60	low N	GLN3.YPD_to_Low_N.60	remnants	B6	C5	GS10	CTTCGAA	91
TEC1_TP2_par_P5_A1_D2_GS13	TEC1	par	YPD_to_Low_N	TP2	60	low N	TEC1.YPD_to_Low_N.60	P5	A1	D2	GS13	CATGAAC	49
TEC1_TP2_par_P5_A4_D8_GS13	TEC1	par	YPD_to_Low_N	TP2	60	low N	TEC1.YPD_to_Low_N.60	P5	A4	D8	GS13	AGTCTCC	73
CHA4_TP3_cer_C3_B5_C10_GS8	CHA4	cer	YPD_to_Low_N	TP3	960	low N	CHA4.YPD_to_Low_N.960	C3	B5	C10	GS8	GGCACTT	82
RTG3_TP1_hyb_H2_D3_F6_GS3	RTG3	hyb	YPD_to_Low_N	TP1	0	YPD	RTG3.YPD_to_Low_N.0	H2	D3	F6	GS3	ACCGATC	68
INO2_TP1_hyb_P3H1_D6_A11_GS6	INO2	hyb	YPD_to_Low_N	TP1	0	YPD	INO2.YPD_to_Low_N.0	P3H1	D6	A11	GS6	AGGCTAG	44
SWI5_TP1_hyb_slow_E5_F7_GS10	SWI5	hyb	YPD_to_Low_N	TP1	0	YPD	SWI5.YPD_to_Low_N.0	slow	E5	F7	GS10	GGCACTT	82
HAP3_TP3_cer_H3_G3_A6_GS12	HAP3	cer	YPD_to_Low_N	TP3	960	low N	HAP3.YPD_to_Low_N.960	H3	G3	A6	GS12	TCTGGAG	87
PHD1_TP2_cer_remnants_A1_H1_GS10	PHD1	cer	YPD_to_Low_N	TP2	60	low N	PHD1.YPD_to_Low_N.60	remnants	A1	H1	GS10	ATAACCG	16
LEU3_TP3_par_P2_E6_B10_GS5	LEU3	par	YPD_to_Low_N	TP3	960	low N	LEU3.YPD_to_Low_N.960	P2	E6	B10	GS5	CTTCGAA	91
HAP5_TP3_hyb_P3H1_G6_C12_GS7	HAP5	hyb	YPD_to_Low_N	TP3	960	low N	HAP5.YPD_to_Low_N.960	P3H1	G6	C12	GS7	GTAGTCT	47
NRG1_TP2_par_P2_E5_E10_GS5	NRG1	par	YPD_to_Low_N	TP2	60	low N	NRG1.YPD_to_Low_N.60	P2	E5	E10	GS5	AGGCGTT	52
WT_TP1_par_P5_E3_G6_GS13	WT	par	YPD_to_Low_N	TP1	0	YPD	WT.YPD_to_Low_N.0	P5	E3	G6	GS13	GGAGACT	21
WT_TP3_cer_C3_A3_G6_GS8	WT	cer	YPD_to_Low_N	TP3	960	low N	WT.YPD_to_Low_N.960	C3	A3	G6	GS8	TGGAGCA	65
FKH1_TP2_hyb_H2_B1_B1_GS4	FKH1	hyb	YPD_to_Low_N	TP2	60	low N	FKH1.YPD_to_Low_N.60	H2	B1	B1	GS4	ACTCAGG	2
CHA4_TP3_hyb_remnants_D1_C10_GS11	CHA4	hyb	YPD_to_Low_N	TP3	960	low N	CHA4.YPD_to_Low_N.960	remnants	D1	C10	GS11	ACTTGGC	23
SUM1_TP1_cer_P4C2_B4_C8_GS9a	SUM1	cer	YPD_to_Low_N	TP1	0	YPD	SUM1.YPD_to_Low_N.0	P4C2	B4	C8	GS9a	GGCGATT	26
RIM101_TP3_hyb_H2_D2_H2_GS4	RIM101	hyb	YPD_to_Low_N	TP3	960	low N	RIM101.YPD_to_Low_N.960	H2	D2	H2	GS4	CGTTGAA	60
MET28_TP2_cer_remnants_H4_D12_GS10	MET28	cer	YPD_to_Low_N	TP2	60	low N	MET28.YPD_to_Low_N.60	remnants	H4	D12	GS10	AACGGTG	72
FKH1_TP2_par_P1_B1_B1_GS2	FKH1	par	YPD_to_Low_N	TP2	60	low N	FKH1.YPD_to_Low_N.60	P1	B1	B1	GS2	TTCAAGC	33
HAP3_TP1_cer_H3_G3_A6_GS12	HAP3	cer	YPD_to_Low_N	TP1	0	YPD	HAP3.YPD_to_Low_N.0	H3	G3	A6	GS12	ACTTGGC	23
BAS1_TP3_cer_P4C2_E1_G3_GS10	BAS1	cer	YPD_to_Low_N	TP3	960	low N	BAS1.YPD_to_Low_N.960	P4C2	E1	G3	GS10	AGCACTG	5
MSN2_TP1_cer_C1_B2_F2_GS1	MSN2	cer	YPD_to_Low_N	TP1	0	YPD	MSN2.YPD_to_Low_N.0	C1	B2	F2	GS1	ATCTGCA	10
BAS1_TP1_cer_slow_B4_G9_GS10	BAS1	cer	YPD_to_Low_N	TP1	0	YPD	BAS1.YPD_to_Low_N.0	slow	B4	G9	GS10	GACACTG	74
RTG1_TP3_cer_P4C2_E5_E12_GS10	RTG1	cer	YPD_to_Low_N	TP3	960	low N	RTG1.YPD_to_Low_N.960	P4C2	E5	E12	GS10	ATGCCAA	37
CBF1_TP2_par_remnants2_H3_H9_GS8	CBF1	par	YPD_to_Low_N	TP2	60	low N	CBF1.YPD_to_Low_N.60	remnants2	H3	H9	GS8	AACGGTG	72
SKN7_TP1_cer_C3_E1_D1_GS7	SKN7	cer	YPD_to_Low_N	TP1	0	YPD	SKN7.YPD_to_Low_N.0	C3	E1	D1	GS7	CGCTACA	53
MSN2_TP3_par_P2_G1_F2_GS5	MSN2	par	YPD_to_Low_N	TP3	960	low N	MSN2.YPD_to_Low_N.960	P2	G1	F2	GS5	TTGCAGA	67
WT_TP1_par_P5_H5_G12_GS13	WT	par	YPD_to_Low_N	TP1	0	YPD	WT.YPD_to_Low_N.0	P5	H5	G12	GS13	AGCCGAT	40
RGT1_TP2_hyb_H2_H5_F10_GS4	RGT1	hyb	YPD_to_Low_N	TP2	60	low N	RGT1.YPD_to_Low_N.60	H2	H5	F10	GS4	AGCCGAT	40
WT_TP3_par_P5_F2_G6_GS14	WT	par	YPD_to_Low_N	TP3	960	low N	WT.YPD_to_Low_N.960	P5	F2	G6	GS14	CGTAACT	14
ZAP1_TP1_par_P2_H5_D9_GS5	ZAP1	par	YPD_to_Low_N	TP1	0	YPD	ZAP1.YPD_to_Low_N.0	P2	H5	D9	GS5	ACTTGGC	23
GCN4_TP3_cer_H3_E6_A10_GS12	GCN4	cer	YPD_to_Low_N	TP3	960	low N	GCN4.YPD_to_Low_N.960	H3	E6	A10	GS12	CGTCAGA	92
WT_TP2_par_P5_E6_G12_GS13	WT	par	YPD_to_Low_N	TP2	60	low N	WT.YPD_to_Low_N.60	P5	E6	G12	GS13	TCGACTC	93
PHD1_TP3_cer_remnants_A4_H1_GS11	PHD1	cer	YPD_to_Low_N	TP3	960	low N	PHD1.YPD_to_Low_N.960	remnants	A4	H1	GS11	CTACGTA	45
HAP4_TP1_cer_C3_D2_B6_GS7	HAP4	cer	YPD_to_Low_N	TP1	0	YPD	HAP4.YPD_to_Low_N.0	C3	D2	B6	GS7	CGTTGAA	60
FKH1_TP1_cer_C1_A4_B7_GS1	FKH1	cer	YPD_to_Low_N	TP1	0	YPD	FKH1.YPD_to_Low_N.0	C1	A4	B7	GS1	CCTAAGG	25
INO2_TP1_par_slow_G4_A11_GS10	INO2	par	YPD_to_Low_N	TP1	0	YPD	INO2.YPD_to_Low_N.0	slow	G4	A11	GS10	TCGATAC	79
NRG1_TP3_hyb_H2_G5_E10_GS4	NRG1	hyb	YPD_to_Low_N	TP3	960	low N	NRG1.YPD_to_Low_N.960	H2	G5	E10	GS4	TCTGGAG	87
PHD1_TP2_hyb_H2_F1_H1_GS4	PHD1	hyb	YPD_to_Low_N	TP2	60	low N	PHD1.YPD_to_Low_N.60	H2	F1	H1	GS4	AGTGCGT	6
GZF3_TP3_cer_C1_H5_D11_GS3	GZF3	cer	YPD_to_Low_N	TP3	960	low N	GZF3.YPD_to_Low_N.960	C1	H5	D11	GS3	AGCCGAT	40
MIG1_TP2_cer_P4C2_G1_D4_GS9b	MIG1	cer	YPD_to_Low_N	TP2	60	low N	MIG1.YPD_to_Low_N.60	P4C2	G1	D4	GS9b	AAGCCTT	55
MBP1_TP1_hyb_remnants_C6_C7_GS9b	MBP1	hyb	YPD_to_Low_N	TP1	0	YPD	MBP1.YPD_to_Low_N.0	remnants	C6	C7	GS9b	CACAGAT	90
MET28_TP2_par_P5_A2_D12_GS13	MET28	par	YPD_to_Low_N	TP2	60	low N	MET28.YPD_to_Low_N.60	P5	A2	D12	GS13	CTTAGTG	57
HAP1_TP3_par_P3H1_F4_E8_GS7	HAP1	par	YPD_to_Low_N	TP3	960	low N	HAP1.YPD_to_Low_N.960	P3H1	F4	E8	GS7	CTTACGG	30
NRG1_TP2_hyb_H2_G2_E4_GS4	NRG1	hyb	YPD_to_Low_N	TP2	60	low N	NRG1.YPD_to_Low_N.60	H2	G2	E4	GS4	AGCTCAA	15
MET28_TP1_par_slow_C2_D6_GS10	MET28	par	YPD_to_Low_N	TP1	0	YPD	MET28.YPD_to_Low_N.0	slow	C2	D6	GS10	TTGCCAG	59
CHA4_TP2_cer_C3_B5_C10_GS8	CHA4	cer	YPD_to_Low_N	TP2	60	low N	CHA4.YPD_to_Low_N.60	C3	B5	C10	GS8	CTGTGAG	34
GCR2_TP3_cer_P4C2_A2_G4_GS10	GCR2	cer	YPD_to_Low_N	TP3	960	low N	GCR2.YPD_to_Low_N.960	P4C2	A2	G4	GS10	GTATGCG	9
MBP1_TP2_hyb_remnants_C3_C7_GS10	MBP1	hyb	YPD_to_Low_N	TP2	60	low N	MBP1.YPD_to_Low_N.60	remnants	C3	C7	GS10	GATCACA	42
WT_TP2_cer_C3_H2_G6_GS8	WT	cer	YPD_to_Low_N	TP2	60	low N	WT.YPD_to_Low_N.60	C3	H2	G6	GS8	ATAACCG	16
HAP4_TP2_hyb_H3_F4_B12_GS12	HAP4	hyb	YPD_to_Low_N	TP2	60	low N	HAP4.YPD_to_Low_N.60	H3	F4	B12	GS12	GCAACTA	51
INO4_TP3_hyb_P3H1_E3_B5_GS7	INO4	hyb	YPD_to_Low_N	TP3	960	low N	INO4.YPD_to_Low_N.960	P3H1	E3	B5	GS7	GGAGACT	21
PHO4_TP1_par_P1_H2_F5_GS2	PHO4	par	YPD_to_Low_N	TP1	0	YPD	PHO4.YPD_to_Low_N.0	P1	H2	F5	GS2	GCAGTAG	11
GLN3_TP1_hyb_remnants_B3_C5_GS9a	GLN3	hyb	YPD_to_Low_N	TP1	0	YPD	GLN3.YPD_to_Low_N.0	remnants	B3	C5	GS9a	AGCCGAT	40
HAP2_TP1_hyb_H3_D1_H5_GS12	HAP2	hyb	YPD_to_Low_N	TP1	0	YPD	HAP2.YPD_to_Low_N.0	H3	D1	H5	GS12	TCTTCGA	4
GLN3_TP2_hyb_remnants_E6_C11_GS10	GLN3	hyb	YPD_to_Low_N	TP2	60	low N	GLN3.YPD_to_Low_N.60	remnants	E6	C11	GS10	TCGACTC	93
DAL80_TP3_hyb_H2_B6_E11_GS4	DAL80	hyb	YPD_to_Low_N	TP3	960	low N	DAL80.YPD_to_Low_N.960	H2	B6	E11	GS4	CACAGAT	90
STB5_TP1_hyb_P3H1_F5_B9_GS6	STB5	hyb	YPD_to_Low_N	TP1	0	YPD	STB5.YPD_to_Low_N.0	P3H1	F5	B9	GS6	CATGCTG	38
RGT1_TP1_par_P2_F2_F4_GS5	RGT1	par	YPD_to_Low_N	TP1	0	YPD	RGT1.YPD_to_Low_N.0	P2	F2	F4	GS5	AGTGCGT	6
HAP2_TP3_par_P2_A3_H5_GS5	HAP2	par	YPD_to_Low_N	TP3	960	low N	HAP2.YPD_to_Low_N.960	P2	A3	H5	GS5	TACGAGG	71
CBF1_TP3_cer_slow_C1_H3_GS11	CBF1	cer	YPD_to_Low_N	TP3	960	low N	CBF1.YPD_to_Low_N.960	slow	C1	H3	GS11	GCAACTA	51
INO2_TP1_hyb_P3H1_D3_A5_GS6	INO2	hyb	YPD_to_Low_N	TP1	0	YPD	INO2.YPD_to_Low_N.0	P3H1	D3	A5	GS6	TACCAGT	20
SWI5_TP1_par_P2_E1_F1_GS5	SWI5	par	YPD_to_Low_N	TP1	0	YPD	SWI5.YPD_to_Low_N.0	P2	E1	F1	GS5	CTATTCG	1
TEC1_TP1_cer_C1_H1_D2_GS1	TEC1	cer	YPD_to_Low_N	TP1	0	YPD	TEC1.YPD_to_Low_N.0	C1	H1	D2	GS1	ATCTGTC	8
DAL80_TP3_cer_C3_C5_E11_GS8	DAL80	cer	YPD_to_Low_N	TP3	960	low N	DAL80.YPD_to_Low_N.960	C3	C5	E11	GS8	CGAGTCT	83
WT_TP2_par_P5_B3_G6_GS13	WT	par	YPD_to_Low_N	TP2	60	low N	WT.YPD_to_Low_N.60	P5	B3	G6	GS13	CAATCGA	66
PHO4_TP3_hyb_slow_B6_F11_GS11	PHO4	hyb	YPD_to_Low_N	TP3	960	low N	PHO4.YPD_to_Low_N.960	slow	B6	F11	GS11	CACAGAT	90
URE2_TP2_cer_C1_D1_G1_GS1	URE2	cer	YPD_to_Low_N	TP2	60	low N	URE2.YPD_to_Low_N.60	C1	D1	G1	GS1	AGGCGTT	52
MSN2_TP2_par_P2_G4_F8_GS5	MSN2	par	YPD_to_Low_N	TP2	60	low N	MSN2.YPD_to_Low_N.60	P2	G4	F8	GS5	ATAGCGA	46
INO4_TP1_hyb_P3H1_E3_B5_GS6	INO4	hyb	YPD_to_Low_N	TP1	0	YPD	INO4.YPD_to_Low_N.0	P3H1	E3	B5	GS6	GGAGACT	21
PHD1_TP2_hyb_H2_F4_H7_GS4	PHD1	hyb	YPD_to_Low_N	TP2	60	low N	PHD1.YPD_to_Low_N.60	H2	F4	H7	GS4	CTTACGG	30
HAP4_TP1_cer_C3_D5_B12_GS7	HAP4	cer	YPD_to_Low_N	TP1	0	YPD	HAP4.YPD_to_Low_N.0	C3	D5	B12	GS7	CAGTCAA	84
FKH1_TP1_par_P1_B4_B7_GS2	FKH1	par	YPD_to_Low_N	TP1	0	YPD	FKH1.YPD_to_Low_N.0	P1	B4	B7	GS2	ATAACCG	16
GCN4_TP2_hyb_P3H1_A6_A10_GS6	GCN4	hyb	YPD_to_Low_N	TP2	60	low N	GCN4.YPD_to_Low_N.60	P3H1	A6	A10	GS6	CCTGATG	89
PHO4_TP2_cer_C1_A3_F5_GS1	PHO4	cer	YPD_to_Low_N	TP2	60	low N	PHO4.YPD_to_Low_N.60	C1	A3	F5	GS1	TGGAGCA	65
HAP4_TP2_par_P4C2_E3_B6_GS9b	HAP4	par	YPD_to_Low_N	TP2	60	low N	HAP4.YPD_to_Low_N.60	P4C2	E3	B6	GS9b	CTGATGG	69
ARG81_TP1_par_remnants2_H2_F9_GS7	ARG81	par	YPD_to_Low_N	TP1	0	YPD	ARG81.YPD_to_Low_N.0	remnants2	H2	F9	GS7	GCAACTA	51
HAP5_TP2_par_P5_G1_C12_GS13	HAP5	par	YPD_to_Low_N	TP2	60	low N	HAP5.YPD_to_Low_N.60	P5	G1	C12	GS13	AAGCCTT	55
GLN3_TP1_par_slow_H4_C11_GS10	GLN3	par	YPD_to_Low_N	TP1	0	YPD	GLN3.YPD_to_Low_N.0	slow	H4	C11	GS10	TGACGGA	80
HAP3_TP3_hyb_P3H1_F6_A12_GS7	HAP3	hyb	YPD_to_Low_N	TP3	960	low N	HAP3.YPD_to_Low_N.960	P3H1	F6	A12	GS7	ATAGCGA	46
ARG81_TP3_par_remnants2_H2_F9_GS13	ARG81	par	YPD_to_Low_N	TP3	960	low N	ARG81.YPD_to_Low_N.960	remnants2	H2	F9	GS13	CTTGCAG	36
SKN7_TP1_par_P3H1_A1_D1_GS6	SKN7	par	YPD_to_Low_N	TP1	0	YPD	SKN7.YPD_to_Low_N.0	P3H1	A1	D1	GS6	CTATTCG	1
GZF3_TP2_par_P4C2_C6_D11_GS9b	GZF3	par	YPD_to_Low_N	TP2	60	low N	GZF3.YPD_to_Low_N.60	P4C2	C6	D11	GS9b	CTTCGAA	91
PHD1_TP2_cer_C1_E1_H1_GS1	PHD1	cer	YPD_to_Low_N	TP2	60	low N	PHD1.YPD_to_Low_N.60	C1	E1	H1	GS1	CGCTACA	53
RFX1_TP1_par_remnants2_G3_G2_GS7	RFX1	par	YPD_to_Low_N	TP1	0	YPD	RFX1.YPD_to_Low_N.0	remnants2	G3	G2	GS7	ATCTGCA	10
RGT1_TP3_hyb_H2_H5_F10_GS4	RGT1	hyb	YPD_to_Low_N	TP3	960	low N	RGT1.YPD_to_Low_N.960	H2	H5	F10	GS4	AACTCGT	88
GAT1_TP2_hyb_H2_G1_B2_GS4	GAT1	hyb	YPD_to_Low_N	TP2	60	low N	GAT1.YPD_to_Low_N.60	H2	G1	B2	GS4	AACGTTC	7
SKN7_TP2_hyb_H2_D4_D7_GS4	SKN7	hyb	YPD_to_Low_N	TP2	60	low N	SKN7.YPD_to_Low_N.60	H2	D4	D7	GS4	GAATAGC	28
WT_TP2_par_P5_F6_G12_GS13	WT	par	YPD_to_Low_N	TP2	60	low N	WT.YPD_to_Low_N.60	P5	F6	G12	GS13	CCATGGT	94
MET28_TP3_hyb_H3_H1_D6_GS12	MET28	hyb	YPD_to_Low_N	TP3	960	low N	MET28.YPD_to_Low_N.960	H3	H1	D6	GS12	AACGGTG	72
URE2_TP3_par_P3H1_B4_G7_GS7	URE2	par	YPD_to_Low_N	TP3	960	low N	URE2.YPD_to_Low_N.960	P3H1	B4	G7	GS7	GGCGATT	26
LEU3_TP2_hyb_H2_F5_B10_GS4	LEU3	hyb	YPD_to_Low_N	TP2	60	low N	LEU3.YPD_to_Low_N.60	H2	F5	B10	GS4	CATGCTG	38
GZF3_TP3_hyb_H2_A3_D5_GS4	GZF3	hyb	YPD_to_Low_N	TP3	960	low N	GZF3.YPD_to_Low_N.960	H2	A3	D5	GS4	TGGAGCA	65
GCR2_TP3_hyb_slow_A6_G10_GS11	GCR2	hyb	YPD_to_Low_N	TP3	960	low N	GCR2.YPD_to_Low_N.960	slow	A6	G10	GS11	CCTGATG	89
GCN4_TP2_cer_H3_E3_A4_GS12	GCN4	cer	YPD_to_Low_N	TP2	60	low N	GCN4.YPD_to_Low_N.60	H3	E3	A4	GS12	CGCTACA	53
RTG1_TP3_cer_P4C2_E2_E6_GS10	RTG1	cer	YPD_to_Low_N	TP3	960	low N	RTG1.YPD_to_Low_N.960	P4C2	E2	E6	GS10	TGCACAA	13
WT_TP2_cer_C3_G6_G12_GS8	WT	cer	YPD_to_Low_N	TP2	60	low N	WT.YPD_to_Low_N.60	C3	G6	G12	GS8	GTAGTCT	47
WT_TP2_par_P5_F3_G6_GS13	WT	par	YPD_to_Low_N	TP2	60	low N	WT.YPD_to_Low_N.60	P5	F3	G6	GS13	GCTTAGA	70
SWI4_TP3_par_P1_D1_E1_GS2	SWI4	par	YPD_to_Low_N	TP3	960	low N	SWI4.YPD_to_Low_N.960	P1	D1	E1	GS2	CAATCGA	66
RGT1_TP3_cer_C1_F2_F4_GS3	RGT1	cer	YPD_to_Low_N	TP3	960	low N	RGT1.YPD_to_Low_N.960	C1	F2	F4	GS3	CGTAACT	14
SOK2_TP1_cer_C1_F1_A2_GS1	SOK2	cer	YPD_to_Low_N	TP1	0	YPD	SOK2.YPD_to_Low_N.0	C1	F1	A2	GS1	AGTGCGT	6
FKH1_TP3_par_P1_B4_B7_GS2	FKH1	par	YPD_to_Low_N	TP3	960	low N	FKH1.YPD_to_Low_N.960	P1	B4	B7	GS2	TGACGGA	80
CBF1_TP3_cer_slow_E3_H3_GS11	CBF1	cer	YPD_to_Low_N	TP3	960	low N	CBF1.YPD_to_Low_N.960	slow	E3	H3	GS11	CTGATGG	69
PHD1_TP2_par_P3H1_C1_H1_GS6	PHD1	par	YPD_to_Low_N	TP2	60	low N	PHD1.YPD_to_Low_N.60	P3H1	C1	H1	GS6	GCAACTA	51
HAP3_TP3_hyb_P3H1_F3_A6_GS7	HAP3	hyb	YPD_to_Low_N	TP3	960	low N	HAP3.YPD_to_Low_N.960	P3H1	F3	A6	GS7	AGCTAGT	22
HAP1_TP2_cer_C1_A2_E2_GS1	HAP1	cer	YPD_to_Low_N	TP2	60	low N	HAP1.YPD_to_Low_N.60	C1	A2	E2	GS1	CTTAGTG	57
BAS1_TP2_cer_slow_B4_G9_GS11	BAS1	cer	YPD_to_Low_N	TP2	60	low N	BAS1.YPD_to_Low_N.60	slow	B4	G9	GS11	GGCGATT	26
TEC1_TP3_cer_C1_H4_D8_GS3	TEC1	cer	YPD_to_Low_N	TP3	960	low N	TEC1.YPD_to_Low_N.960	C1	H4	D8	GS3	GCCTACA	32
HAP2_TP1_par_P1_A6_H11_GS2	HAP2	par	YPD_to_Low_N	TP1	0	YPD	HAP2.YPD_to_Low_N.0	P1	A6	H11	GS2	CCTAAGG	25
HAP3_TP2_hyb_P3H1_F6_A12_GS6	HAP3	hyb	YPD_to_Low_N	TP2	60	low N	HAP3.YPD_to_Low_N.60	P3H1	F6	A12	GS6	CCATGGT	94
GCN4_TP1_hyb_P3H1_A6_A10_GS6	GCN4	hyb	YPD_to_Low_N	TP1	0	YPD	GCN4.YPD_to_Low_N.0	P3H1	A6	A10	GS6	CGCTTGA	41
INO4_TP1_cer_C1_G2_B5_GS1	INO4	cer	YPD_to_Low_N	TP1	0	YPD	INO4.YPD_to_Low_N.0	C1	G2	B5	GS1	AGCTCAA	15
MBP1_TP3_hyb_remnants_C6_C7_GS11	MBP1	hyb	YPD_to_Low_N	TP3	960	low N	MBP1.YPD_to_Low_N.960	remnants	C6	C7	GS11	ACGCTAT	78
HAP2_TP2_par_P1_A6_H11_GS2	HAP2	par	YPD_to_Low_N	TP2	60	low N	HAP2.YPD_to_Low_N.60	P1	A6	H11	GS2	CTTAGTG	57
MSN2_TP3_hyb_H2_B5_F8_GS4	MSN2	hyb	YPD_to_Low_N	TP3	960	low N	MSN2.YPD_to_Low_N.960	H2	B5	F8	GS4	GGCACTT	82
SWI4_TP1_hyb_remnants_D3_E7_GS9a	SWI4	hyb	YPD_to_Low_N	TP1	0	YPD	SWI4.YPD_to_Low_N.0	remnants	D3	E7	GS9a	AGGCTAG	44
GLN3_TP2_cer_P4C2_C5_C11_GS9b	GLN3	cer	YPD_to_Low_N	TP2	60	low N	GLN3.YPD_to_Low_N.60	P4C2	C5	C11	GS9b	CGAGTCT	83
HAP4_TP3_cer_C3_D5_B12_GS8	HAP4	cer	YPD_to_Low_N	TP3	960	low N	HAP4.YPD_to_Low_N.960	C3	D5	B12	GS8	CAGTCAA	84
HAP4_TP1_hyb_H3_G4_B12_GS12	HAP4	hyb	YPD_to_Low_N	TP1	0	YPD	HAP4.YPD_to_Low_N.0	H3	G4	B12	GS12	TACCAGT	20
MBP1_TP1_cer_C1_B4_C7_GS1	MBP1	cer	YPD_to_Low_N	TP1	0	YPD	MBP1.YPD_to_Low_N.0	C1	B4	C7	GS1	GGCGATT	26
SKN7_TP3_cer_C3_E1_D1_GS8	SKN7	cer	YPD_to_Low_N	TP3	960	low N	SKN7.YPD_to_Low_N.960	C3	E1	D1	GS8	CGCTACA	53
WT_TP1_par_P5_F6_G12_GS13	WT	par	YPD_to_Low_N	TP1	0	YPD	WT.YPD_to_Low_N.0	P5	F6	G12	GS13	ATAGCGA	46
HAP3_TP2_par_P1_B3_A6_GS2	HAP3	par	YPD_to_Low_N	TP2	60	low N	HAP3.YPD_to_Low_N.60	P1	B3	A6	GS2	AGGCTAG	44
HAP1_TP1_par_P3H1_F4_E8_GS6	HAP1	par	YPD_to_Low_N	TP1	0	YPD	HAP1.YPD_to_Low_N.0	P3H1	F4	E8	GS6	CTTACGG	30
GCR2_TP1_par_remnants2_G5_G4_GS7	GCR2	par	YPD_to_Low_N	TP1	0	YPD	GCR2.YPD_to_Low_N.0	remnants2	G5	G4	GS7	CTGTGAG	34
WT_TP2_hyb_H2_E6_G12_GS4	WT	hyb	YPD_to_Low_N	TP2	60	low N	WT.YPD_to_Low_N.60	H2	E6	G12	GS4	CTACGTA	45
MBP1_TP1_par_P1_C4_C7_GS2	MBP1	par	YPD_to_Low_N	TP1	0	YPD	MBP1.YPD_to_Low_N.0	P1	C4	C7	GS2	TGTCACG	17
RTG3_TP1_par_P1_D3_F6_GS2	RTG3	par	YPD_to_Low_N	TP1	0	YPD	RTG3.YPD_to_Low_N.0	P1	D3	F6	GS2	CGTAACT	14
GLN3_TP1_cer_P4C2_C2_C5_GS9a	GLN3	cer	YPD_to_Low_N	TP1	0	YPD	GLN3.YPD_to_Low_N.0	P4C2	C2	C5	GS9a	GCAGTAG	11
HAP4_TP1_hyb_H3_F4_B12_GS12	HAP4	hyb	YPD_to_Low_N	TP1	0	YPD	HAP4.YPD_to_Low_N.0	H3	F4	B12	GS12	GGATCTA	19
ROX1_TP3_par_P3H1_G4_A9_GS7	ROX1	par	YPD_to_Low_N	TP3	960	low N	ROX1.YPD_to_Low_N.960	P3H1	G4	A9	GS7	CGCATAT	31
MIG1_TP2_cer_P4C2_G4_D10_GS9b	MIG1	cer	YPD_to_Low_N	TP2	60	low N	MIG1.YPD_to_Low_N.60	P4C2	G4	D10	GS9b	TCGATAC	79
HAP4_TP1_par_P4C2_E6_B12_GS9a	HAP4	par	YPD_to_Low_N	TP1	0	YPD	HAP4.YPD_to_Low_N.0	P4C2	E6	B12	GS9a	CTACGTA	45
INO4_TP1_hyb_P3H1_E6_B11_GS6	INO4	hyb	YPD_to_Low_N	TP1	0	YPD	INO4.YPD_to_Low_N.0	P3H1	E6	B11	GS6	CTACGTA	45
CHA4_TP1_cer_C3_B5_C10_GS7	CHA4	cer	YPD_to_Low_N	TP1	0	YPD	CHA4.YPD_to_Low_N.0	C3	B5	C10	GS7	GGCACTT	82
INO4_TP2_par_P4C2_A3_B5_GS9b	INO4	par	YPD_to_Low_N	TP2	60	low N	INO4.YPD_to_Low_N.60	P4C2	A3	B5	GS9b	TGGAGCA	65
CHA4_TP1_par_P2_F6_C10_GS5	CHA4	par	YPD_to_Low_N	TP1	0	YPD	CHA4.YPD_to_Low_N.0	P2	F6	C10	GS5	GAATAGC	28
WT_TP1_cer_C3_G5_G12_GS7	WT	cer	YPD_to_Low_N	TP1	0	YPD	WT.YPD_to_Low_N.0	C3	G5	G12	GS7	TCTGGAG	87
WT_TP1_par_P5_F3_G6_GS13	WT	par	YPD_to_Low_N	TP1	0	YPD	WT.YPD_to_Low_N.0	P5	F3	G6	GS13	AGCTAGT	22
RTG3_TP2_par_remnants_B1_F12_GS10	RTG3	par	YPD_to_Low_N	TP2	60	low N	RTG3.YPD_to_Low_N.60	remnants	B1	F12	GS10	TACCAGT	20
INO2_TP3_cer_C3_C4_A11_GS8	INO2	cer	YPD_to_Low_N	TP3	960	low N	INO2.YPD_to_Low_N.960	C3	C4	A11	GS8	ATCAGGC	75
ARG81_TP1_cer_C1_E2_F3_GS1	ARG81	cer	YPD_to_Low_N	TP1	0	YPD	ARG81.YPD_to_Low_N.0	C1	E2	F3	GS1	TGCACAA	13
AFT1_TP1_cer_P4C2_B2_H4_GS9a	AFT1	cer	YPD_to_Low_N	TP1	0	YPD	AFT1.YPD_to_Low_N.0	P4C2	B2	H4	GS9a	ATCTGCA	10
MET28_TP2_cer_remnants_G1_D6_GS10	MET28	cer	YPD_to_Low_N	TP2	60	low N	MET28.YPD_to_Low_N.60	remnants	G1	D6	GS10	CTTACGG	30
MBP1_TP3_hyb_H2_C1_C1_GS4	MBP1	hyb	YPD_to_Low_N	TP3	960	low N	MBP1.YPD_to_Low_N.960	H2	C1	C1	GS4	GCAACTA	51
SWI4_TP2_par_remnants2_G6_E7_GS8	SWI4	par	YPD_to_Low_N	TP2	60	low N	SWI4.YPD_to_Low_N.60	remnants2	G6	E7	GS8	TACTAGC	50
TEC1_TP1_par_P5_A4_D8_GS13	TEC1	par	YPD_to_Low_N	TP1	0	YPD	TEC1.YPD_to_Low_N.0	P5	A4	D8	GS13	CCTAAGG	25
MBP1_TP1_par_remnants2_G2_C1_GS7	MBP1	par	YPD_to_Low_N	TP1	0	YPD	MBP1.YPD_to_Low_N.0	remnants2	G2	C1	GS7	AGTGCGT	6
HAP3_TP3_cer_C3_D4_A12_GS8	HAP3	cer	YPD_to_Low_N	TP3	960	low N	HAP3.YPD_to_Low_N.960	C3	D4	A12	GS8	CGGATTA	76
INO2_TP2_hyb_P3H1_D3_A5_GS6	INO2	hyb	YPD_to_Low_N	TP2	60	low N	INO2.YPD_to_Low_N.60	P3H1	D3	A5	GS6	ACCGATC	68
URE2_TP2_hyb_H2_E4_G7_GS4	URE2	hyb	YPD_to_Low_N	TP2	60	low N	URE2.YPD_to_Low_N.60	H2	E4	G7	GS4	ACTGCAG	29
ROX1_TP2_cer_C1_D5_A9_GS1	ROX1	cer	YPD_to_Low_N	TP2	60	low N	ROX1.YPD_to_Low_N.60	C1	D5	A9	GS1	CAGTCAA	84
WT_TP1_par_P5_G2_G6_GS13	WT	par	YPD_to_Low_N	TP1	0	YPD	WT.YPD_to_Low_N.0	P5	G2	G6	GS13	AGCTCAA	15
RIM101_TP2_par_P2_H4_H8_GS5	RIM101	par	YPD_to_Low_N	TP2	60	low N	RIM101.YPD_to_Low_N.60	P2	H4	H8	GS5	GTAGTCT	47
HAP2_TP3_hyb_H3_E1_H5_GS12	HAP2	hyb	YPD_to_Low_N	TP3	960	low N	HAP2.YPD_to_Low_N.960	H3	E1	H5	GS12	CTGATGG	69
WT_TP3_cer_C3_F6_G12_GS8	WT	cer	YPD_to_Low_N	TP3	960	low N	WT.YPD_to_Low_N.960	C3	F6	G12	GS8	CCATGGT	94
WT_TP2_cer_C3_C3_G6_GS8	WT	cer	YPD_to_Low_N	TP2	60	low N	WT.YPD_to_Low_N.60	C3	C3	G6	GS8	GGATCTA	19
MBP1_TP1_par_P2_C4_C7_GS5	MBP1	par	YPD_to_Low_N	TP1	0	YPD	MBP1.YPD_to_Low_N.0	P2	C4	C7	GS5	CAGTACG	12
YAP1_TP1_par_P2_A5_C9_GS5	YAP1	par	YPD_to_Low_N	TP1	0	YPD	YAP1.YPD_to_Low_N.0	P2	A5	C9	GS5	ATAACCG	16
NRG1_TP3_par_P1_E5_E10_GS2	NRG1	par	YPD_to_Low_N	TP3	960	low N	NRG1.YPD_to_Low_N.960	P1	E5	E10	GS2	CCTGACT	86
WT_TP1_cer_C1_G6_G12_GS1	WT	cer	YPD_to_Low_N	TP1	0	YPD	WT.YPD_to_Low_N.0	C1	G6	G12	GS1	GTAGTCT	47
ARG80_TP3_cer_C3_H1_E3_GS8	ARG80	cer	YPD_to_Low_N	TP3	960	low N	ARG80.YPD_to_Low_N.960	C3	H1	E3	GS8	CTACAGC	56
WT_TP2_par_WTs_G8_G12_GS2018	WT	par	YPD_to_Low_N	TP2	60	low N	WT.YPD_to_Low_N.60	WTs	G8	G12	lib2018_plate1	AACAGCT	63
WT_TP2_hyb_WTs_H9_WT2_GS2018	WT	hyb	YPD_to_Low_N	TP2	60	low N	WT.YPD_to_Low_N.60	WTs	H9	WT2	lib2018_plate1	AACGGTG	72
WT_TP1_cer_WTs_G1_G12_GS2018	WT	cer	YPD_to_Low_N	TP1	0	YPD	WT.YPD_to_Low_N.0	WTs	G1	G12	lib2018_plate1	AACGTTC	7
WT_TP2_cer_WTs_G7_G12_GS2018	WT	cer	YPD_to_Low_N	TP2	60	low N	WT.YPD_to_Low_N.60	WTs	G7	G12	lib2018_plate1	AAGCCTT	55
WT_TP2_cer_WTs_F7_G12_GS2018	WT	cer	YPD_to_Low_N	TP2	60	low N	WT.YPD_to_Low_N.60	WTs	F7	G12	lib2018_plate1	AAGGTAC	54
WT_TP1_cer_WTs_C1_G6_GS2018	WT	cer	YPD_to_Low_N	TP1	0	YPD	WT.YPD_to_Low_N.0	WTs	C1	G6	lib2018_plate1	ACACGTG	3
WT_TP2_hyb_WTs_D9_G12_GS2018	WT	hyb	YPD_to_Low_N	TP2	60	low N	WT.YPD_to_Low_N.60	WTs	D9	G12	lib2018_plate1	ACCGATC	68
WT_TP2_hyb_WTs_F10_WT2_GS2018	WT	hyb	YPD_to_Low_N	TP2	60	low N	WT.YPD_to_Low_N.60	WTs	F10	WT2	lib2018_plate1	ACGCTAT	78
WT_TP1_cer_WTs_B1_G6_GS2018	WT	cer	YPD_to_Low_N	TP1	0	YPD	WT.YPD_to_Low_N.0	WTs	B1	G6	lib2018_plate1	ACTCAGG	2
WT_TP1_hyb_WTs_E4_WT2_GS2018	WT	hyb	YPD_to_Low_N	TP1	0	YPD	WT.YPD_to_Low_N.0	WTs	E4	WT2	lib2018_plate1	ACTGCAG	29
WT_TP1_hyb_WTs_G3_WT2_GS2018	WT	hyb	YPD_to_Low_N	TP1	0	YPD	WT.YPD_to_Low_N.0	WTs	G3	WT2	lib2018_plate1	ACTTGGC	23
WT_TP1_cer_WTs_E1_G12_GS2018	WT	cer	YPD_to_Low_N	TP1	0	YPD	WT.YPD_to_Low_N.0	WTs	E1	G12	lib2018_plate1	AGCACTG	5
WT_TP1_hyb_WTs_F3_WT2_GS2018	WT	hyb	YPD_to_Low_N	TP1	0	YPD	WT.YPD_to_Low_N.0	WTs	F3	WT2	lib2018_plate1	AGCTAGT	22
WT_TP1_par_WTs_G2_G12_GS2018	WT	par	YPD_to_Low_N	TP1	0	YPD	WT.YPD_to_Low_N.0	WTs	G2	G12	lib2018_plate1	AGCTCAA	15
WT_TP2_cer_WTs_D7_G6_GS2018	WT	cer	YPD_to_Low_N	TP2	60	low N	WT.YPD_to_Low_N.60	WTs	D7	G6	lib2018_plate1	AGGCGTT	52
WT_TP1_hyb_WTs_D6_G12_GS2018	WT	hyb	YPD_to_Low_N	TP1	0	YPD	WT.YPD_to_Low_N.0	WTs	D6	G12	lib2018_plate1	AGGCTAG	44
WT_TP2_hyb_WTs_A10_G12_GS2018	WT	hyb	YPD_to_Low_N	TP2	60	low N	WT.YPD_to_Low_N.60	WTs	A10	G12	lib2018_plate1	AGTCTCC	73
WT_TP1_cer_WTs_F1_G12_GS2018	WT	cer	YPD_to_Low_N	TP1	0	YPD	WT.YPD_to_Low_N.0	WTs	F1	G12	lib2018_plate1	AGTGCGT	6
WT_TP1_par_WTs_H2_G12_GS2018	WT	par	YPD_to_Low_N	TP1	0	YPD	WT.YPD_to_Low_N.0	WTs	H2	G12	lib2018_plate1	ATAACCG	16
WT_TP1_hyb_WTs_F6_WT2_GS2018	WT	hyb	YPD_to_Low_N	TP1	0	YPD	WT.YPD_to_Low_N.0	WTs	F6	WT2	lib2018_plate1	ATAGCGA	46
WT_TP2_hyb_WTs_C10_G12_GS2018	WT	hyb	YPD_to_Low_N	TP2	60	low N	WT.YPD_to_Low_N.60	WTs	C10	G12	lib2018_plate1	ATCAGGC	75
WT_TP1_par_WTs_B2_G6_GS2018	WT	par	YPD_to_Low_N	TP1	0	YPD	WT.YPD_to_Low_N.0	WTs	B2	G6	lib2018_plate1	ATCTGCA	10
WT_TP1_cer_WTs_H1_G12_GS2018	WT	cer	YPD_to_Low_N	TP1	0	YPD	WT.YPD_to_Low_N.0	WTs	H1	G12	lib2018_plate1	ATCTGTC	8
WT_TP1_hyb_WTs_E5_WT2_GS2018	WT	hyb	YPD_to_Low_N	TP1	0	YPD	WT.YPD_to_Low_N.0	WTs	E5	WT2	lib2018_plate1	ATGCCAA	37
WT_TP2_hyb_WTs_B9_G12_GS2018	WT	hyb	YPD_to_Low_N	TP2	60	low N	WT.YPD_to_Low_N.60	WTs	B9	G12	lib2018_plate1	CAATCGA	66
WT_TP2_hyb_WTs_B12_G12_GS2018	WT	hyb	YPD_to_Low_N	TP2	60	low N	WT.YPD_to_Low_N.60	WTs	B12	G12	lib2018_plate1	CACAGAT	90
WT_TP1_par_WTs_D2_G6_GS2018	WT	par	YPD_to_Low_N	TP1	0	YPD	WT.YPD_to_Low_N.0	WTs	D2	G6	lib2018_plate1	CAGTACG	12
WT_TP2_hyb_WTs_D11_G12_GS2018	WT	hyb	YPD_to_Low_N	TP2	60	low N	WT.YPD_to_Low_N.60	WTs	D11	G12	lib2018_plate1	CAGTCAA	84
WT_TP2_cer_WTs_A7_G6_GS2018	WT	cer	YPD_to_Low_N	TP2	60	low N	WT.YPD_to_Low_N.60	WTs	A7	G6	lib2018_plate1	CATGAAC	49
WT_TP1_hyb_WTs_F5_WT2_GS2018	WT	hyb	YPD_to_Low_N	TP1	0	YPD	WT.YPD_to_Low_N.0	WTs	F5	WT2	lib2018_plate1	CATGCTG	38
WT_TP2_hyb_WTs_F12_WT2_GS2018	WT	hyb	YPD_to_Low_N	TP2	60	low N	WT.YPD_to_Low_N.60	WTs	F12	WT2	lib2018_plate1	CCATGGT	94
WT_TP1_hyb_WTs_A4_G12_GS2018	WT	hyb	YPD_to_Low_N	TP1	0	YPD	WT.YPD_to_Low_N.0	WTs	A4	G12	lib2018_plate1	CCTAAGG	25
WT_TP2_hyb_WTs_F11_WT2_GS2018	WT	hyb	YPD_to_Low_N	TP2	60	low N	WT.YPD_to_Low_N.60	WTs	F11	WT2	lib2018_plate1	CCTGACT	86
WT_TP2_hyb_WTs_A12_G12_GS2018	WT	hyb	YPD_to_Low_N	TP2	60	low N	WT.YPD_to_Low_N.60	WTs	A12	G12	lib2018_plate1	CCTGATG	89
WT_TP2_hyb_WTs_C11_G12_GS2018	WT	hyb	YPD_to_Low_N	TP2	60	low N	WT.YPD_to_Low_N.60	WTs	C11	G12	lib2018_plate1	CGAGTCT	83
WT_TP1_hyb_WTs_G4_WT2_GS2018	WT	hyb	YPD_to_Low_N	TP1	0	YPD	WT.YPD_to_Low_N.0	WTs	G4	WT2	lib2018_plate1	CGCATAT	31
WT_TP2_cer_WTs_E7_G12_GS2018	WT	cer	YPD_to_Low_N	TP2	60	low N	WT.YPD_to_Low_N.60	WTs	E7	G12	lib2018_plate1	CGCTACA	53
WT_TP1_hyb_WTs_A6_G12_GS2018	WT	hyb	YPD_to_Low_N	TP1	0	YPD	WT.YPD_to_Low_N.0	WTs	A6	G12	lib2018_plate1	CGCTTGA	41
WT_TP2_hyb_WTs_D10_G12_GS2018	WT	hyb	YPD_to_Low_N	TP2	60	low N	WT.YPD_to_Low_N.60	WTs	D10	G12	lib2018_plate1	CGGATTA	76
WT_TP1_par_WTs_F2_G12_GS2018	WT	par	YPD_to_Low_N	TP1	0	YPD	WT.YPD_to_Low_N.0	WTs	F2	G12	lib2018_plate1	CGTAACT	14
WT_TP2_hyb_WTs_D12_G12_GS2018	WT	hyb	YPD_to_Low_N	TP2	60	low N	WT.YPD_to_Low_N.60	WTs	D12	G12	lib2018_plate1	CGTCAGA	92
WT_TP2_par_WTs_D8_G6_GS2018	WT	par	YPD_to_Low_N	TP2	60	low N	WT.YPD_to_Low_N.60	WTs	D8	G6	lib2018_plate1	CGTTGAA	60
WT_TP1_hyb_WTs_G5_WT2_GS2018	WT	hyb	YPD_to_Low_N	TP1	0	YPD	WT.YPD_to_Low_N.0	WTs	G5	WT2	lib2018_plate1	CTAAGCG	39
WT_TP2_cer_WTs_H7_G12_GS2018	WT	cer	YPD_to_Low_N	TP2	60	low N	WT.YPD_to_Low_N.60	WTs	H7	G12	lib2018_plate1	CTACAGC	56
WT_TP1_hyb_WTs_E6_WT2_GS2018	WT	hyb	YPD_to_Low_N	TP1	0	YPD	WT.YPD_to_Low_N.0	WTs	E6	WT2	lib2018_plate1	CTACGTA	45
WT_TP1_hyb_WTs_C5_G12_GS2018	WT	hyb	YPD_to_Low_N	TP1	0	YPD	WT.YPD_to_Low_N.0	WTs	C5	G12	lib2018_plate1	CTAGTGC	35
WT_TP1_cer_WTs_A1_G6_GS2018	WT	cer	YPD_to_Low_N	TP1	0	YPD	WT.YPD_to_Low_N.0	WTs	A1	G6	lib2018_plate1	CTATTCG	1
WT_TP2_hyb_WTs_E9_WT2_GS2018	WT	hyb	YPD_to_Low_N	TP2	60	low N	WT.YPD_to_Low_N.60	WTs	E9	WT2	lib2018_plate1	CTGATGG	69
WT_TP1_hyb_WTs_B5_G12_GS2018	WT	hyb	YPD_to_Low_N	TP1	0	YPD	WT.YPD_to_Low_N.0	WTs	B5	G12	lib2018_plate1	CTGTGAG	34
WT_TP1_hyb_WTs_F4_WT2_GS2018	WT	hyb	YPD_to_Low_N	TP1	0	YPD	WT.YPD_to_Low_N.0	WTs	F4	WT2	lib2018_plate1	CTTACGG	30
WT_TP2_par_WTs_A8_G6_GS2018	WT	par	YPD_to_Low_N	TP2	60	low N	WT.YPD_to_Low_N.60	WTs	A8	G6	lib2018_plate1	CTTAGTG	57
WT_TP2_hyb_WTs_C12_G12_GS2018	WT	hyb	YPD_to_Low_N	TP2	60	low N	WT.YPD_to_Low_N.60	WTs	C12	G12	lib2018_plate1	CTTCGAA	91
WT_TP1_hyb_WTs_D5_G12_GS2018	WT	hyb	YPD_to_Low_N	TP1	0	YPD	WT.YPD_to_Low_N.0	WTs	D5	G12	lib2018_plate1	CTTGCAG	36
WT_TP1_hyb_WTs_D4_G12_GS2018	WT	hyb	YPD_to_Low_N	TP1	0	YPD	WT.YPD_to_Low_N.0	WTs	D4	G12	lib2018_plate1	GAATAGC	28
WT_TP2_hyb_WTs_B10_G12_GS2018	WT	hyb	YPD_to_Low_N	TP2	60	low N	WT.YPD_to_Low_N.60	WTs	B10	G12	lib2018_plate1	GACACTG	74
WT_TP1_hyb_WTs_B6_G12_GS2018	WT	hyb	YPD_to_Low_N	TP1	0	YPD	WT.YPD_to_Low_N.0	WTs	B6	G12	lib2018_plate1	GATCACA	42
WT_TP2_cer_WTs_C7_G6_GS2018	WT	cer	YPD_to_Low_N	TP2	60	low N	WT.YPD_to_Low_N.60	WTs	C7	G6	lib2018_plate1	GCAACTA	51
WT_TP1_par_WTs_C2_G6_GS2018	WT	par	YPD_to_Low_N	TP1	0	YPD	WT.YPD_to_Low_N.0	WTs	C2	G6	lib2018_plate1	GCAGTAG	11
WT_TP1_hyb_WTs_H4_WT2_GS2018	WT	hyb	YPD_to_Low_N	TP1	0	YPD	WT.YPD_to_Low_N.0	WTs	H4	WT2	lib2018_plate1	GCCTACA	32
WT_TP1_hyb_WTs_C4_G12_GS2018	WT	hyb	YPD_to_Low_N	TP1	0	YPD	WT.YPD_to_Low_N.0	WTs	C4	G12	lib2018_plate1	GCTGAAT	27
WT_TP2_hyb_WTs_F9_WT2_GS2018	WT	hyb	YPD_to_Low_N	TP2	60	low N	WT.YPD_to_Low_N.60	WTs	F9	WT2	lib2018_plate1	GCTTAGA	70
WT_TP2_hyb_WTs_A11_G12_GS2018	WT	hyb	YPD_to_Low_N	TP2	60	low N	WT.YPD_to_Low_N.60	WTs	A11	G12	lib2018_plate1	GCTTCAT	81
WT_TP1_hyb_WTs_E3_WT2_GS2018	WT	hyb	YPD_to_Low_N	TP1	0	YPD	WT.YPD_to_Low_N.0	WTs	E3	WT2	lib2018_plate1	GGAGACT	21
WT_TP1_hyb_WTs_C3_G12_GS2018	WT	hyb	YPD_to_Low_N	TP1	0	YPD	WT.YPD_to_Low_N.0	WTs	C3	G12	lib2018_plate1	GGATCTA	19
WT_TP2_hyb_WTs_B11_G12_GS2018	WT	hyb	YPD_to_Low_N	TP2	60	low N	WT.YPD_to_Low_N.60	WTs	B11	G12	lib2018_plate1	GGCACTT	82
WT_TP1_hyb_WTs_B4_G12_GS2018	WT	hyb	YPD_to_Low_N	TP1	0	YPD	WT.YPD_to_Low_N.0	WTs	B4	G12	lib2018_plate1	GGCGATT	26
WT_TP2_par_WTs_B8_G6_GS2018	WT	par	YPD_to_Low_N	TP2	60	low N	WT.YPD_to_Low_N.60	WTs	B8	G6	lib2018_plate1	GGCTAGA	58
WT_TP1_hyb_WTs_G6_WT2_GS2018	WT	hyb	YPD_to_Low_N	TP1	0	YPD	WT.YPD_to_Low_N.0	WTs	G6	WT2	lib2018_plate1	GTAGTCT	47
WT_TP1_par_WTs_A2_G6_GS2018	WT	par	YPD_to_Low_N	TP1	0	YPD	WT.YPD_to_Low_N.0	WTs	A2	G6	lib2018_plate1	GTATGCG	9
WT_TP1_hyb_WTs_C6_G12_GS2018	WT	hyb	YPD_to_Low_N	TP1	0	YPD	WT.YPD_to_Low_N.0	WTs	C6	G12	lib2018_plate1	GTGCTAT	43
WT_TP1_hyb_WTs_D3_G12_GS2018	WT	hyb	YPD_to_Low_N	TP1	0	YPD	WT.YPD_to_Low_N.0	WTs	D3	G12	lib2018_plate1	TACCAGT	20
WT_TP2_hyb_WTs_G9_WT2_GS2018	WT	hyb	YPD_to_Low_N	TP2	60	low N	WT.YPD_to_Low_N.60	WTs	G9	WT2	lib2018_plate1	TACGAGG	71
WT_TP2_hyb_WTs_G12_WT2_GS2018	WT	hyb	YPD_to_Low_N	TP2	60	low N	WT.YPD_to_Low_N.60	WTs	G12	WT2	lib2018_plate1	TACGTAC	95
WT_TP2_cer_WTs_B7_G6_GS2018	WT	cer	YPD_to_Low_N	TP2	60	low N	WT.YPD_to_Low_N.60	WTs	B7	G6	lib2018_plate1	TACTAGC	50
WT_TP1_hyb_WTs_H3_WT2_GS2018	WT	hyb	YPD_to_Low_N	TP1	0	YPD	WT.YPD_to_Low_N.0	WTs	H3	WT2	lib2018_plate1	TAGCGCA	24
WT_TP2_par_WTs_F8_G12_GS2018	WT	par	YPD_to_Low_N	TP2	60	low N	WT.YPD_to_Low_N.60	WTs	F8	G12	lib2018_plate1	TATAGGC	62
WT_TP2_par_WTs_H8_G12_GS2018	WT	par	YPD_to_Low_N	TP2	60	low N	WT.YPD_to_Low_N.60	WTs	H8	G12	lib2018_plate1	TCACAAG	64
WT_TP2_par_WTs_E8_G12_GS2018	WT	par	YPD_to_Low_N	TP2	60	low N	WT.YPD_to_Low_N.60	WTs	E8	G12	lib2018_plate1	TCGAAGG	61
WT_TP2_hyb_WTs_E12_WT2_GS2018	WT	hyb	YPD_to_Low_N	TP2	60	low N	WT.YPD_to_Low_N.60	WTs	E12	WT2	lib2018_plate1	TCGACTC	93
WT_TP2_hyb_WTs_G10_WT2_GS2018	WT	hyb	YPD_to_Low_N	TP2	60	low N	WT.YPD_to_Low_N.60	WTs	G10	WT2	lib2018_plate1	TCGATAC	79
WT_TP2_hyb_WTs_E10_WT2_GS2018	WT	hyb	YPD_to_Low_N	TP2	60	low N	WT.YPD_to_Low_N.60	WTs	E10	WT2	lib2018_plate1	TCTCGAA	77
WT_TP2_hyb_WTs_G11_WT2_GS2018	WT	hyb	YPD_to_Low_N	TP2	60	low N	WT.YPD_to_Low_N.60	WTs	G11	WT2	lib2018_plate1	TCTGGAG	87
WT_TP1_cer_WTs_D1_G6_GS2018	WT	cer	YPD_to_Low_N	TP1	0	YPD	WT.YPD_to_Low_N.0	WTs	D1	G6	lib2018_plate1	TCTTCGA	4
WT_TP2_hyb_WTs_H10_WT2_GS2018	WT	hyb	YPD_to_Low_N	TP2	60	low N	WT.YPD_to_Low_N.60	WTs	H10	WT2	lib2018_plate1	TGACGGA	80
WT_TP1_par_WTs_E2_G12_GS2018	WT	par	YPD_to_Low_N	TP1	0	YPD	WT.YPD_to_Low_N.0	WTs	E2	G12	lib2018_plate1	TGCACAA	13
WT_TP2_hyb_WTs_E11_WT2_GS2018	WT	hyb	YPD_to_Low_N	TP2	60	low N	WT.YPD_to_Low_N.60	WTs	E11	WT2	lib2018_plate1	TGCCTAA	85
WT_TP2_hyb_WTs_A9_G12_GS2018	WT	hyb	YPD_to_Low_N	TP2	60	low N	WT.YPD_to_Low_N.60	WTs	A9	G12	lib2018_plate1	TGGAGCA	65
WT_TP1_hyb_WTs_A3_G12_GS2018	WT	hyb	YPD_to_Low_N	TP1	0	YPD	WT.YPD_to_Low_N.0	WTs	A3	G12	lib2018_plate1	TGTCACG	17
WT_TP1_hyb_WTs_A5_G12_GS2018	WT	hyb	YPD_to_Low_N	TP1	0	YPD	WT.YPD_to_Low_N.0	WTs	A5	G12	lib2018_plate1	TTCAAGC	33
WT_TP1_hyb_WTs_B3_G12_GS2018	WT	hyb	YPD_to_Low_N	TP1	0	YPD	WT.YPD_to_Low_N.0	WTs	B3	G12	lib2018_plate1	TTCCTGA	18
WT_TP2_hyb_WTs_C9_G12_GS2018	WT	hyb	YPD_to_Low_N	TP2	60	low N	WT.YPD_to_Low_N.60	WTs	C9	G12	lib2018_plate1	TTGCAGA	67
WT_TP2_par_WTs_C8_G6_GS2018	WT	par	YPD_to_Low_N	TP2	60	low N	WT.YPD_to_Low_N.60	WTs	C8	G6	lib2018_plate1	TTGCCAG	59
WT_TP3_hyb_WTs_G3_WT2_GS2018	WT	hyb	YPD_to_Low_N	TP3	960	low N	WT.YPD_to_Low_N.960	WTs	G3	WT2	lib2018_plate2	ACTTGGC	23
WT_TP3_par_WTs_G2_G12_GS2018	WT	par	YPD_to_Low_N	TP3	960	low N	WT.YPD_to_Low_N.960	WTs	G2	G12	lib2018_plate2	AGCTCAA	15
WT_TP3_hyb_WTs_D6_G12_GS2018	WT	hyb	YPD_to_Low_N	TP3	960	low N	WT.YPD_to_Low_N.960	WTs	D6	G12	lib2018_plate2	AGGCTAG	44
WT_TP3_cer_WTs_F1_G12_GS2018	WT	cer	YPD_to_Low_N	TP3	960	low N	WT.YPD_to_Low_N.960	WTs	F1	G12	lib2018_plate2	AGTGCGT	6
WT_TP3_par_WTs_H2_G12_GS2018	WT	par	YPD_to_Low_N	TP3	960	low N	WT.YPD_to_Low_N.960	WTs	H2	G12	lib2018_plate2	ATAACCG	16
WT_TP3_hyb_WTs_E5_WT2_GS2018	WT	hyb	YPD_to_Low_N	TP3	960	low N	WT.YPD_to_Low_N.960	WTs	E5	WT2	lib2018_plate2	ATGCCAA	37
WT_TP3_hyb_WTs_E6_WT2_GS2018	WT	hyb	YPD_to_Low_N	TP3	960	low N	WT.YPD_to_Low_N.960	WTs	E6	WT2	lib2018_plate2	CTACGTA	45
WT_TP3_hyb_WTs_D4_G12_GS2018	WT	hyb	YPD_to_Low_N	TP3	960	low N	WT.YPD_to_Low_N.960	WTs	D4	G12	lib2018_plate2	GAATAGC	28
WT_TP3_par_WTs_C2_G6_GS2018	WT	par	YPD_to_Low_N	TP3	960	low N	WT.YPD_to_Low_N.960	WTs	C2	G6	lib2018_plate2	GCAGTAG	11
WT_TP3_hyb_WTs_C4_G12_GS2018	WT	hyb	YPD_to_Low_N	TP3	960	low N	WT.YPD_to_Low_N.960	WTs	C4	G12	lib2018_plate2	GCTGAAT	27
WT_TP3_hyb_WTs_E3_WT2_GS2018	WT	hyb	YPD_to_Low_N	TP3	960	low N	WT.YPD_to_Low_N.960	WTs	E3	WT2	lib2018_plate2	GGAGACT	21
WT_TP3_hyb_WTs_C3_G12_GS2018	WT	hyb	YPD_to_Low_N	TP3	960	low N	WT.YPD_to_Low_N.960	WTs	C3	G12	lib2018_plate2	GGATCTA	19
WT_TP3_hyb_WTs_D3_G12_GS2018	WT	hyb	YPD_to_Low_N	TP3	960	low N	WT.YPD_to_Low_N.960	WTs	D3	G12	lib2018_plate2	TACCAGT	20
WT_TP3_hyb_WTs_H3_WT2_GS2018	WT	hyb	YPD_to_Low_N	TP3	960	low N	WT.YPD_to_Low_N.960	WTs	H3	WT2	lib2018_plate2	TAGCGCA	24
WT_TP3_cer_WTs_D1_G6_GS2018	WT	cer	YPD_to_Low_N	TP3	960	low N	WT.YPD_to_Low_N.960	WTs	D1	G6	lib2018_plate2	TCTTCGA	4
WT_TP3_cer_WTs_G1_G12_GS2018	WT	cer	YPD_to_Low_N	TP3	960	low N	WT.YPD_to_Low_N.960	WTs	G1	G12	lib2018_plate4	AACGTTC	7
WT_TP3_cer_WTs_C1_G6_GS2018	WT	cer	YPD_to_Low_N	TP3	960	low N	WT.YPD_to_Low_N.960	WTs	C1	G6	lib2018_plate4	ACACGTG	3
WT_TP3_cer_WTs_B1_G6_GS2018	WT	cer	YPD_to_Low_N	TP3	960	low N	WT.YPD_to_Low_N.960	WTs	B1	G6	lib2018_plate4	ACTCAGG	2
WT_TP3_hyb_WTs_E4_WT2_GS2018	WT	hyb	YPD_to_Low_N	TP3	960	low N	WT.YPD_to_Low_N.960	WTs	E4	WT2	lib2018_plate4	ACTGCAG	29
WT_TP3_cer_WTs_E1_G12_GS2018	WT	cer	YPD_to_Low_N	TP3	960	low N	WT.YPD_to_Low_N.960	WTs	E1	G12	lib2018_plate4	AGCACTG	5
WT_TP3_hyb_WTs_F3_WT2_GS2018	WT	hyb	YPD_to_Low_N	TP3	960	low N	WT.YPD_to_Low_N.960	WTs	F3	WT2	lib2018_plate4	AGCTAGT	22
WT_TP3_hyb_WTs_F6_WT2_GS2018	WT	hyb	YPD_to_Low_N	TP3	960	low N	WT.YPD_to_Low_N.960	WTs	F6	WT2	lib2018_plate4	ATAGCGA	46
WT_TP3_par_WTs_B2_G6_GS2018	WT	par	YPD_to_Low_N	TP3	960	low N	WT.YPD_to_Low_N.960	WTs	B2	G6	lib2018_plate4	ATCTGCA	10
WT_TP3_par_WTs_D2_G6_GS2018	WT	par	YPD_to_Low_N	TP3	960	low N	WT.YPD_to_Low_N.960	WTs	D2	G6	lib2018_plate4	CAGTACG	12
WT_TP3_hyb_WTs_F5_WT2_GS2018	WT	hyb	YPD_to_Low_N	TP3	960	low N	WT.YPD_to_Low_N.960	WTs	F5	WT2	lib2018_plate4	CATGCTG	38
WT_TP3_hyb_WTs_A4_G12_GS2018	WT	hyb	YPD_to_Low_N	TP3	960	low N	WT.YPD_to_Low_N.960	WTs	A4	G12	lib2018_plate4	CCTAAGG	25
WT_TP3_hyb_WTs_G4_WT2_GS2018	WT	hyb	YPD_to_Low_N	TP3	960	low N	WT.YPD_to_Low_N.960	WTs	G4	WT2	lib2018_plate4	CGCATAT	31
WT_TP3_hyb_WTs_A6_G12_GS2018	WT	hyb	YPD_to_Low_N	TP3	960	low N	WT.YPD_to_Low_N.960	WTs	A6	G12	lib2018_plate4	CGCTTGA	41
WT_TP3_par_WTs_F2_G12_GS2018	WT	par	YPD_to_Low_N	TP3	960	low N	WT.YPD_to_Low_N.960	WTs	F2	G12	lib2018_plate4	CGTAACT	14
WT_TP3_hyb_WTs_G5_WT2_GS2018	WT	hyb	YPD_to_Low_N	TP3	960	low N	WT.YPD_to_Low_N.960	WTs	G5	WT2	lib2018_plate4	CTAAGCG	39
WT_TP3_hyb_WTs_C5_G12_GS2018	WT	hyb	YPD_to_Low_N	TP3	960	low N	WT.YPD_to_Low_N.960	WTs	C5	G12	lib2018_plate4	CTAGTGC	35
WT_TP3_cer_WTs_A1_G6_GS2018	WT	cer	YPD_to_Low_N	TP3	960	low N	WT.YPD_to_Low_N.960	WTs	A1	G6	lib2018_plate4	CTATTCG	1
WT_TP3_hyb_WTs_B5_G12_GS2018	WT	hyb	YPD_to_Low_N	TP3	960	low N	WT.YPD_to_Low_N.960	WTs	B5	G12	lib2018_plate4	CTGTGAG	34
WT_TP3_hyb_WTs_F4_WT2_GS2018	WT	hyb	YPD_to_Low_N	TP3	960	low N	WT.YPD_to_Low_N.960	WTs	F4	WT2	lib2018_plate4	CTTACGG	30
WT_TP3_hyb_WTs_D5_G12_GS2018	WT	hyb	YPD_to_Low_N	TP3	960	low N	WT.YPD_to_Low_N.960	WTs	D5	G12	lib2018_plate4	CTTGCAG	36
WT_TP3_hyb_WTs_B6_G12_GS2018	WT	hyb	YPD_to_Low_N	TP3	960	low N	WT.YPD_to_Low_N.960	WTs	B6	G12	lib2018_plate4	GATCACA	42
WT_TP3_hyb_WTs_H4_WT2_GS2018	WT	hyb	YPD_to_Low_N	TP3	960	low N	WT.YPD_to_Low_N.960	WTs	H4	WT2	lib2018_plate4	GCCTACA	32
WT_TP3_hyb_WTs_B4_G12_GS2018	WT	hyb	YPD_to_Low_N	TP3	960	low N	WT.YPD_to_Low_N.960	WTs	B4	G12	lib2018_plate4	GGCGATT	26
WT_TP3_hyb_WTs_G6_WT2_GS2018	WT	hyb	YPD_to_Low_N	TP3	960	low N	WT.YPD_to_Low_N.960	WTs	G6	WT2	lib2018_plate4	GTAGTCT	47
WT_TP3_par_WTs_A2_G6_GS2018	WT	par	YPD_to_Low_N	TP3	960	low N	WT.YPD_to_Low_N.960	WTs	A2	G6	lib2018_plate4	GTATGCG	9
WT_TP3_hyb_WTs_C6_G12_GS2018	WT	hyb	YPD_to_Low_N	TP3	960	low N	WT.YPD_to_Low_N.960	WTs	C6	G12	lib2018_plate4	GTGCTAT	43
WT_TP3_par_WTs_E2_G12_GS2018	WT	par	YPD_to_Low_N	TP3	960	low N	WT.YPD_to_Low_N.960	WTs	E2	G12	lib2018_plate4	TGCACAA	13
WT_TP3_hyb_WTs_A3_G12_GS2018	WT	hyb	YPD_to_Low_N	TP3	960	low N	WT.YPD_to_Low_N.960	WTs	A3	G12	lib2018_plate4	TGTCACG	17
WT_TP3_hyb_WTs_A5_G12_GS2018	WT	hyb	YPD_to_Low_N	TP3	960	low N	WT.YPD_to_Low_N.960	WTs	A5	G12	lib2018_plate4	TTCAAGC	33
WT_TP3_hyb_WTs_B3_G12_GS2018	WT	hyb	YPD_to_Low_N	TP3	960	low N	WT.YPD_to_Low_N.960	WTs	B3	G12	lib2018_plate4	TTCCTGA	18
WT_13_cer_HAP4andWTonYPD	WT	cer	Growth_curve	13	664.8	YPD	WT.Growth_curve.664.8	HAP4andWTonYPD	NaN	G6	lib2018_plate3	AACGTTC	7
WT_14_cer_HAP4andWTonYPD	WT	cer	Growth_curve	14	1390.2	YPD	WT.Growth_curve.1390.2	HAP4andWTonYPD	NaN	G6	lib2018_plate3	AAGCCTT	55
WT_12_cer_HAP4andWTonYPD	WT	cer	Growth_curve	12	604.8	YPD	WT.Growth_curve.604.8	HAP4andWTonYPD	NaN	G6	lib2018_plate3	AAGGTAC	54
WT_5_cer_HAP4andWTonYPD	WT	cer	Growth_curve	5	214.8	YPD	WT.Growth_curve.214.8	HAP4andWTonYPD	NaN	G6	lib2018_plate3	ACACGTG	3
WT_8_hyb_HAP4andWTonYPD	WT	hyb	Growth_curve	8	364.8	YPD	WT.Growth_curve.364.8	HAP4andWTonYPD	NaN	WT2	lib2018_plate3	ACCGATC	68
WT_3_cer_HAP4andWTonYPD	WT	cer	Growth_curve	3	124.8	YPD	WT.Growth_curve.124.8	HAP4andWTonYPD	NaN	G6	lib2018_plate3	ACTCAGG	2
HAP4_9_cer_HAP4andWTonYPD	HAP4	cer	Growth_curve	9	424.8	YPD	HAP4.Growth_curve.424.8	HAP4andWTonYPD	NaN		lib2018_plate3	ACTGCAG	29
WT_13_hyb_HAP4andWTonYPD	WT	hyb	Growth_curve	13	664.8	YPD	WT.Growth_curve.664.8	HAP4andWTonYPD	NaN	WT2	lib2018_plate3	ACTTGGC	23
WT_9_cer_HAP4andWTonYPD	WT	cer	Growth_curve	9	424.8	YPD	WT.Growth_curve.424.8	HAP4andWTonYPD	NaN	G6	lib2018_plate3	AGCACTG	5
WT_11_hyb_HAP4andWTonYPD	WT	hyb	Growth_curve	11	544.8	YPD	WT.Growth_curve.544.8	HAP4andWTonYPD	NaN	WT2	lib2018_plate3	AGCTAGT	22
WT_13_par_HAP4andWTonYPD	WT	par	Growth_curve	13	664.8	YPD	WT.Growth_curve.664.8	HAP4andWTonYPD	NaN	G6	lib2018_plate3	AGCTCAA	15
WT_8_cer_HAP4andWTonYPD	WT	cer	Growth_curve	8	364.8	YPD	WT.Growth_curve.364.8	HAP4andWTonYPD	NaN	G6	lib2018_plate3	AGGCGTT	52
HAP4_7_hyb_HAP4andWTonYPD	HAP4	hyb	Growth_curve	7	304.8	YPD	HAP4.Growth_curve.304.8	HAP4andWTonYPD	NaN		lib2018_plate3	AGGCTAG	44
HAP4_2_cer_HAP4andWTonYPD	HAP4	cer	Growth_curve	2	79.8	YPD	HAP4.Growth_curve.79.8	HAP4andWTonYPD	NaN		lib2018_plate3	AGTCTCC	73
WT_11_cer_HAP4andWTonYPD	WT	cer	Growth_curve	11	544.8	YPD	WT.Growth_curve.544.8	HAP4andWTonYPD	NaN	G6	lib2018_plate3	AGTGCGT	6
HAP4_6_cer_HAP4andWTonYPD	HAP4	cer	Growth_curve	6	259.8	YPD	HAP4.Growth_curve.259.8	HAP4andWTonYPD	NaN		lib2018_plate3	ATCAGGC	75
WT_3_par_HAP4andWTonYPD	WT	par	Growth_curve	3	124.8	YPD	WT.Growth_curve.124.8	HAP4andWTonYPD	NaN	G6	lib2018_plate3	ATCTGCA	10
WT_15_cer_HAP4andWTonYPD	WT	cer	Growth_curve	15	1950	YPD	WT.Growth_curve.1950	HAP4andWTonYPD	NaN	G6	lib2018_plate3	ATCTGTC	8
HAP4_9_par_HAP4andWTonYPD	HAP4	par	Growth_curve	9	424.8	YPD	HAP4.Growth_curve.424.8	HAP4andWTonYPD	NaN		lib2018_plate3	ATGCCAA	37
WT_4_hyb_HAP4andWTonYPD	WT	hyb	Growth_curve	4	169.8	YPD	WT.Growth_curve.169.8	HAP4andWTonYPD	NaN	WT2	lib2018_plate3	CAATCGA	66
HAP4_4_hyb_HAP4andWTonYPD	HAP4	hyb	Growth_curve	4	169.8	YPD	HAP4.Growth_curve.169.8	HAP4andWTonYPD	NaN		lib2018_plate3	CACAGAT	90
WT_7_par_HAP4andWTonYPD	WT	par	Growth_curve	7	304.8	YPD	WT.Growth_curve.304.8	HAP4andWTonYPD	NaN	G6	lib2018_plate3	CAGTACG	12
HAP4_8_par_HAP4andWTonYPD	HAP4	par	Growth_curve	8	364.8	YPD	HAP4.Growth_curve.364.8	HAP4andWTonYPD	NaN		lib2018_plate3	CAGTCAA	84
WT_2_cer_HAP4andWTonYPD	WT	cer	Growth_curve	2	79.8	YPD	WT.Growth_curve.79.8	HAP4andWTonYPD	NaN	G6	lib2018_plate3	CATGAAC	49
HAP4_11_par_HAP4andWTonYPD	HAP4	par	Growth_curve	11	544.8	YPD	HAP4.Growth_curve.544.8	HAP4andWTonYPD	NaN		lib2018_plate3	CATGCTG	38
HAP4_12_hyb_HAP4andWTonYPD	HAP4	hyb	Growth_curve	12	604.8	YPD	HAP4.Growth_curve.604.8	HAP4andWTonYPD	NaN		lib2018_plate3	CCATGGT	94
HAP4_1_cer_HAP4andWTonYPD	HAP4	cer	Growth_curve	1	0	YPD	HAP4.Growth_curve.0	HAP4andWTonYPD	NaN		lib2018_plate3	CCTAAGG	25
HAP4_12_par_HAP4andWTonYPD	HAP4	par	Growth_curve	12	604.8	YPD	HAP4.Growth_curve.604.8	HAP4andWTonYPD	NaN		lib2018_plate3	CCTGACT	86
HAP4_2_hyb_HAP4andWTonYPD	HAP4	hyb	Growth_curve	2	79.8	YPD	HAP4.Growth_curve.79.8	HAP4andWTonYPD	NaN		lib2018_plate3	CCTGATG	89
HAP4_6_par_HAP4andWTonYPD	HAP4	par	Growth_curve	6	259.8	YPD	HAP4.Growth_curve.259.8	HAP4andWTonYPD	NaN		lib2018_plate3	CGAGTCT	83
HAP4_13_cer_HAP4andWTonYPD	HAP4	cer	Growth_curve	13	664.8	YPD	HAP4.Growth_curve.664.8	HAP4andWTonYPD	NaN		lib2018_plate3	CGCATAT	31
WT_10_cer_HAP4andWTonYPD	WT	cer	Growth_curve	10	484.8	YPD	WT.Growth_curve.484.8	HAP4andWTonYPD	NaN	G6	lib2018_plate3	CGCTACA	53
HAP4_1_hyb_HAP4andWTonYPD	HAP4	hyb	Growth_curve	1	0	YPD	HAP4.Growth_curve.0	HAP4andWTonYPD	NaN		lib2018_plate3	CGCTTGA	41
HAP4_8_cer_HAP4andWTonYPD	HAP4	cer	Growth_curve	8	364.8	YPD	HAP4.Growth_curve.364.8	HAP4andWTonYPD	NaN		lib2018_plate3	CGGATTA	76
WT_11_par_HAP4andWTonYPD	WT	par	Growth_curve	11	544.8	YPD	WT.Growth_curve.544.8	HAP4andWTonYPD	NaN	G6	lib2018_plate3	CGTAACT	14
HAP4_8_hyb_HAP4andWTonYPD	HAP4	hyb	Growth_curve	8	364.8	YPD	HAP4.Growth_curve.364.8	HAP4andWTonYPD	NaN		lib2018_plate3	CGTCAGA	92
WT_8_par_HAP4andWTonYPD	WT	par	Growth_curve	8	364.8	YPD	WT.Growth_curve.364.8	HAP4andWTonYPD	NaN	G6	lib2018_plate3	CGTTGAA	60
HAP4_13_par_HAP4andWTonYPD	HAP4	par	Growth_curve	13	664.8	YPD	HAP4.Growth_curve.664.8	HAP4andWTonYPD	NaN		lib2018_plate3	CTAAGCG	39
HAP4_9_hyb_HAP4andWTonYPD	HAP4	hyb	Growth_curve	9	424.8	YPD	HAP4.Growth_curve.424.8	HAP4andWTonYPD	NaN		lib2018_plate3	CTACGTA	45
WT_1_cer_HAP4andWTonYPD	WT	cer	Growth_curve	1	0	YPD	WT.Growth_curve.0	HAP4andWTonYPD	NaN	G6	lib2018_plate3	CTATTCG	1
WT_10_hyb_HAP4andWTonYPD	WT	hyb	Growth_curve	10	484.8	YPD	WT.Growth_curve.484.8	HAP4andWTonYPD	NaN	WT2	lib2018_plate3	CTGATGG	69
HAP4_3_par_HAP4andWTonYPD	HAP4	par	Growth_curve	3	124.8	YPD	HAP4.Growth_curve.124.8	HAP4andWTonYPD	NaN		lib2018_plate3	CTGTGAG	34
WT_2_par_HAP4andWTonYPD	WT	par	Growth_curve	2	79.8	YPD	WT.Growth_curve.79.8	HAP4andWTonYPD	NaN	G6	lib2018_plate3	CTTAGTG	57
HAP4_6_hyb_HAP4andWTonYPD	HAP4	hyb	Growth_curve	6	259.8	YPD	HAP4.Growth_curve.259.8	HAP4andWTonYPD	NaN		lib2018_plate3	CTTCGAA	91
HAP4_7_par_HAP4andWTonYPD	HAP4	par	Growth_curve	7	304.8	YPD	HAP4.Growth_curve.304.8	HAP4andWTonYPD	NaN		lib2018_plate3	CTTGCAG	36
HAP4_7_cer_HAP4andWTonYPD	HAP4	cer	Growth_curve	7	304.8	YPD	HAP4.Growth_curve.304.8	HAP4andWTonYPD	NaN		lib2018_plate3	GAATAGC	28
HAP4_4_cer_HAP4andWTonYPD	HAP4	cer	Growth_curve	4	169.8	YPD	HAP4.Growth_curve.169.8	HAP4andWTonYPD	NaN		lib2018_plate3	GACACTG	74
HAP4_3_hyb_HAP4andWTonYPD	HAP4	hyb	Growth_curve	3	124.8	YPD	HAP4.Growth_curve.124.8	HAP4andWTonYPD	NaN		lib2018_plate3	GATCACA	42
WT_6_cer_HAP4andWTonYPD	WT	cer	Growth_curve	6	259.8	YPD	WT.Growth_curve.259.8	HAP4andWTonYPD	NaN	G6	lib2018_plate3	GCAACTA	51
WT_5_par_HAP4andWTonYPD	WT	par	Growth_curve	5	214.8	YPD	WT.Growth_curve.214.8	HAP4andWTonYPD	NaN	G6	lib2018_plate3	GCAGTAG	11
HAP4_5_cer_HAP4andWTonYPD	HAP4	cer	Growth_curve	5	214.8	YPD	HAP4.Growth_curve.214.8	HAP4andWTonYPD	NaN		lib2018_plate3	GCTGAAT	27
HAP4_2_par_HAP4andWTonYPD	HAP4	par	Growth_curve	2	79.8	YPD	HAP4.Growth_curve.79.8	HAP4andWTonYPD	NaN		lib2018_plate3	GCTTCAT	81
WT_9_hyb_HAP4andWTonYPD	WT	hyb	Growth_curve	9	424.8	YPD	WT.Growth_curve.424.8	HAP4andWTonYPD	NaN	WT2	lib2018_plate3	GGAGACT	21
WT_5_hyb_HAP4andWTonYPD	WT	hyb	Growth_curve	5	214.8	YPD	WT.Growth_curve.214.8	HAP4andWTonYPD	NaN	WT2	lib2018_plate3	GGATCTA	19
HAP4_4_par_HAP4andWTonYPD	HAP4	par	Growth_curve	4	169.8	YPD	HAP4.Growth_curve.169.8	HAP4andWTonYPD	NaN		lib2018_plate3	GGCACTT	82
HAP4_3_cer_HAP4andWTonYPD	HAP4	cer	Growth_curve	3	124.8	YPD	HAP4.Growth_curve.124.8	HAP4andWTonYPD	NaN		lib2018_plate3	GGCGATT	26
WT_4_par_HAP4andWTonYPD	WT	par	Growth_curve	4	169.8	YPD	WT.Growth_curve.169.8	HAP4andWTonYPD	NaN	G6	lib2018_plate3	GGCTAGA	58
HAP4_13_hyb_HAP4andWTonYPD	HAP4	hyb	Growth_curve	13	664.8	YPD	HAP4.Growth_curve.664.8	HAP4andWTonYPD	NaN		lib2018_plate3	GTAGTCT	47
WT_1_par_HAP4andWTonYPD	WT	par	Growth_curve	1	0	YPD	WT.Growth_curve.0	HAP4andWTonYPD	NaN	G6	lib2018_plate3	GTATGCG	9
HAP4_5_hyb_HAP4andWTonYPD	HAP4	hyb	Growth_curve	5	214.8	YPD	HAP4.Growth_curve.214.8	HAP4andWTonYPD	NaN		lib2018_plate3	GTGCTAT	43
WT_7_hyb_HAP4andWTonYPD	WT	hyb	Growth_curve	7	304.8	YPD	WT.Growth_curve.304.8	HAP4andWTonYPD	NaN	WT2	lib2018_plate3	TACCAGT	20
WT_4_cer_HAP4andWTonYPD	WT	cer	Growth_curve	4	169.8	YPD	WT.Growth_curve.169.8	HAP4andWTonYPD	NaN	G6	lib2018_plate3	TACTAGC	50
WT_10_par_HAP4andWTonYPD	WT	par	Growth_curve	10	484.8	YPD	WT.Growth_curve.484.8	HAP4andWTonYPD	NaN	G6	lib2018_plate3	TCGAAGG	61
HAP4_10_hyb_HAP4andWTonYPD	HAP4	hyb	Growth_curve	10	484.8	YPD	HAP4.Growth_curve.484.8	HAP4andWTonYPD	NaN		lib2018_plate3	TCGACTC	93
HAP4_14_cer_HAP4andWTonYPD	HAP4	cer	Growth_curve	14	1390.2	YPD	HAP4.Growth_curve.1390.2	HAP4andWTonYPD	NaN		lib2018_plate3	TCGATAC	79
HAP4_10_cer_HAP4andWTonYPD	HAP4	cer	Growth_curve	10	484.8	YPD	HAP4.Growth_curve.484.8	HAP4andWTonYPD	NaN		lib2018_plate3	TCTCGAA	77
WT_7_cer_HAP4andWTonYPD	WT	cer	Growth_curve	7	304.8	YPD	WT.Growth_curve.304.8	HAP4andWTonYPD	NaN	G6	lib2018_plate3	TCTTCGA	4
WT_9_par_HAP4andWTonYPD	WT	par	Growth_curve	9	424.8	YPD	WT.Growth_curve.424.8	HAP4andWTonYPD	NaN	G6	lib2018_plate3	TGCACAA	13
HAP4_10_par_HAP4andWTonYPD	HAP4	par	Growth_curve	10	484.8	YPD	HAP4.Growth_curve.484.8	HAP4andWTonYPD	NaN		lib2018_plate3	TGCCTAA	85
WT_2_hyb_HAP4andWTonYPD	WT	hyb	Growth_curve	2	79.8	YPD	WT.Growth_curve.79.8	HAP4andWTonYPD	NaN	WT2	lib2018_plate3	TGGAGCA	65
WT_1_hyb_HAP4andWTonYPD	WT	hyb	Growth_curve	1	0	YPD	WT.Growth_curve.0	HAP4andWTonYPD	NaN	WT2	lib2018_plate3	TGTCACG	17
HAP4_1_par_HAP4andWTonYPD	HAP4	par	Growth_curve	1	0	YPD	HAP4.Growth_curve.0	HAP4andWTonYPD	NaN		lib2018_plate3	TTCAAGC	33
WT_3_hyb_HAP4andWTonYPD	WT	hyb	Growth_curve	3	124.8	YPD	WT.Growth_curve.124.8	HAP4andWTonYPD	NaN	WT2	lib2018_plate3	TTCCTGA	18
WT_6_hyb_HAP4andWTonYPD	WT	hyb	Growth_curve	6	259.8	YPD	WT.Growth_curve.259.8	HAP4andWTonYPD	NaN	WT2	lib2018_plate3	TTGCAGA	67
WT_6_par_HAP4andWTonYPD	WT	par	Growth_curve	6	259.8	YPD	WT.Growth_curve.259.8	HAP4andWTonYPD	NaN	G6	lib2018_plate3	TTGCCAG	59
WT_15_par_HAP4andWTonYPD	WT	par	Growth_curve	15	1950	YPD	WT.Growth_curve.1950	HAP4andWTonYPD	NaN	G6	lib2018_plate4	ACTTGGC	23
WT_12_hyb_HAP4andWTonYPD	WT	hyb	Growth_curve	12	604.8	YPD	WT.Growth_curve.604.8	HAP4andWTonYPD	NaN	WT2	lib2018_plate4	AGCTCAA	15
WT_12_par_HAP4andWTonYPD	WT	par	Growth_curve	12	604.8	YPD	WT.Growth_curve.604.8	HAP4andWTonYPD	NaN	G6	lib2018_plate4	AGGCTAG	44
HAP4_11_cer_HAP4andWTonYPD	HAP4	cer	Growth_curve	11	544.8	YPD	HAP4.Growth_curve.544.8	HAP4andWTonYPD	NaN		lib2018_plate4	AGTGCGT	6
WT_14_hyb_HAP4andWTonYPD	WT	hyb	Growth_curve	14	1390.2	YPD	WT.Growth_curve.1390.2	HAP4andWTonYPD	NaN	WT2	lib2018_plate4	ATAACCG	16
HAP4_15_hyb_HAP4andWTonYPD	HAP4	hyb	Growth_curve	15	1950	YPD	HAP4.Growth_curve.1950	HAP4andWTonYPD	NaN		lib2018_plate4	ATGCCAA	37
WT_14_par_HAP4andWTonYPD	WT	par	Growth_curve	14	1390.2	YPD	WT.Growth_curve.1390.2	HAP4andWTonYPD	NaN	G6	lib2018_plate4	CTACGTA	45
HAP4_15_par_HAP4andWTonYPD	HAP4	par	Growth_curve	15	1950	YPD	HAP4.Growth_curve.1950	HAP4andWTonYPD	NaN		lib2018_plate4	GAATAGC	28
HAP4_11_hyb_HAP4andWTonYPD	HAP4	hyb	Growth_curve	11	544.8	YPD	HAP4.Growth_curve.544.8	HAP4andWTonYPD	NaN		lib2018_plate4	GCAGTAG	11
HAP4_15_cer_HAP4andWTonYPD	HAP4	cer	Growth_curve	15	1950	YPD	HAP4.Growth_curve.1950	HAP4andWTonYPD	NaN		lib2018_plate4	GCTGAAT	27
HAP4_14_hyb_HAP4andWTonYPD	HAP4	hyb	Growth_curve	14	1390.2	YPD	HAP4.Growth_curve.1390.2	HAP4andWTonYPD	NaN		lib2018_plate4	GGAGACT	21
HAP4_12_cer_HAP4andWTonYPD	HAP4	cer	Growth_curve	12	604.8	YPD	HAP4.Growth_curve.604.8	HAP4andWTonYPD	NaN		lib2018_plate4	GGATCTA	19
HAP4_14_par_HAP4andWTonYPD	HAP4	par	Growth_curve	14	1390.2	YPD	HAP4.Growth_curve.1390.2	HAP4andWTonYPD	NaN		lib2018_plate4	TACCAGT	20
WT_15_hyb_HAP4andWTonYPD	WT	hyb	Growth_curve	15	1950	YPD	WT.Growth_curve.1950	HAP4andWTonYPD	NaN	WT2	lib2018_plate4	TAGCGCA	24
HAP4_5_par_HAP4andWTonYPD	HAP4	par	Growth_curve	5	214.8	YPD	HAP4.Growth_curve.214.8	HAP4andWTonYPD	NaN		lib2018_plate4	TCTTCGA	4
WT_27_par_SCtoLowPi_rep1	WT	par	SC_to_No_Pi	27	330	No Pi	WT.SC_to_No_Pi.330	SCtoLowPi	NaN	G6	lib2019	AACAGCT	63
WT_17_hyb_SCtoLowPi_rep2	WT	hyb	SC_to_No_Pi	17	180	No Pi	WT.SC_to_No_Pi.180	SCtoLowPi	NaN	WT2	lib2019	AACGGTG	72
WT_25_cer_SCtoLowPi_rep1	WT	cer	SC_to_No_Pi	25	300	No Pi	WT.SC_to_No_Pi.300	SCtoLowPi	NaN	G6	lib2019	AACGTTC	7
PHO4_17_par_SCtoLowPi_rep2	PHO4	par	SC_to_No_Pi	17	180	No Pi	PHO4.SC_to_No_Pi.180	SCtoLowPi	NaN	F5	lib2019	AACTCGT	88
WT_27_cer_SCtoLowPi_rep1	WT	cer	SC_to_No_Pi	27	330	No Pi	WT.SC_to_No_Pi.330	SCtoLowPi	NaN	G6	lib2019	AAGCCTT	55
WT_23_cer_SCtoLowPi_rep1	WT	cer	SC_to_No_Pi	23	270	No Pi	WT.SC_to_No_Pi.270	SCtoLowPi	NaN	G6	lib2019	AAGGTAC	54
WT_9_cer_SCtoLowPi_rep1	WT	cer	SC_to_No_Pi	9	60	No Pi	WT.SC_to_No_Pi.60	SCtoLowPi	NaN	G6	lib2019	ACACGTG	3
WT_15_hyb_SCtoLowPi_rep1	WT	hyb	SC_to_No_Pi	15	150	No Pi	WT.SC_to_No_Pi.150	SCtoLowPi	NaN	WT2	lib2019	ACCGATC	68
WT_24_cer_SCtoLowPi_rep1	WT	cer	SC_to_No_Pi	24	285	No Pi	WT.SC_to_No_Pi.285	SCtoLowPi	NaN	G6	lib2019	ACGCTAT	78
WT_5_cer_SCtoLowPi_rep1	WT	cer	SC_to_No_Pi	5	20	No Pi	WT.SC_to_No_Pi.20	SCtoLowPi	NaN	G6	lib2019	ACTCAGG	2
WT_18_cer_SCtoLowPi_rep1	WT	cer	SC_to_No_Pi	18	195	No Pi	WT.SC_to_No_Pi.195	SCtoLowPi	NaN	G6	lib2019	ACTGCAG	29
PHO4_1_par_SCtoLowPi_rep2	PHO4	par	SC_to_No_Pi	1	-5	SC	PHO4.SC_to_No_Pi.-5	SCtoLowPi	NaN	F5	lib2019	AGCCGAT	40
WT_21_hyb_SCtoLowPi_rep1	WT	hyb	SC_to_No_Pi	21	240	No Pi	WT.SC_to_No_Pi.240	SCtoLowPi	NaN	WT2	lib2019	AGCTAGT	22
WT_25_par_SCtoLowPi_rep1	WT	par	SC_to_No_Pi	25	300	No Pi	WT.SC_to_No_Pi.300	SCtoLowPi	NaN	G6	lib2019	AGCTCAA	15
WT_15_cer_SCtoLowPi_rep1	WT	cer	SC_to_No_Pi	15	150	No Pi	WT.SC_to_No_Pi.150	SCtoLowPi	NaN	G6	lib2019	AGGCGTT	52
WT_14_hyb_SCtoLowPi_rep1	WT	hyb	SC_to_No_Pi	14	135	No Pi	WT.SC_to_No_Pi.135	SCtoLowPi	NaN	WT2	lib2019	AGGCTAG	44
WT_4_cer_SCtoLowPi_rep1	WT	cer	SC_to_No_Pi	4	10	No Pi	WT.SC_to_No_Pi.10	SCtoLowPi	NaN	G6	lib2019	AGTCTCC	73
WT_21_cer_SCtoLowPi_rep1	WT	cer	SC_to_No_Pi	21	240	No Pi	WT.SC_to_No_Pi.240	SCtoLowPi	NaN	G6	lib2019	AGTGCGT	6
WT_1_par_SCtoLowPi_rep2	WT	par	SC_to_No_Pi	1	-5	SC	WT.SC_to_No_Pi.-5	SCtoLowPi	NaN	G6	lib2019	ATAACCG	16
WT_22_hyb_SCtoLowPi_rep1	WT	hyb	SC_to_No_Pi	22	255	No Pi	WT.SC_to_No_Pi.255	SCtoLowPi	NaN	WT2	lib2019	ATAGCGA	46
WT_12_cer_SCtoLowPi_rep1	WT	cer	SC_to_No_Pi	12	105	No Pi	WT.SC_to_No_Pi.105	SCtoLowPi	NaN	G6	lib2019	ATCAGGC	75
WT_5_par_SCtoLowPi_rep1	WT	par	SC_to_No_Pi	5	20	No Pi	WT.SC_to_No_Pi.20	SCtoLowPi	NaN	G6	lib2019	ATCTGCA	10
WT_1_cer_SCtoLowPi_rep2	WT	cer	SC_to_No_Pi	1	-5	SC	WT.SC_to_No_Pi.-5	SCtoLowPi	NaN	G6	lib2019	ATCTGTC	8
WT_18_par_SCtoLowPi_rep1	WT	par	SC_to_No_Pi	18	195	No Pi	WT.SC_to_No_Pi.195	SCtoLowPi	NaN	G6	lib2019	ATGCCAA	37
WT_7_hyb_SCtoLowPi_rep1	WT	hyb	SC_to_No_Pi	7	40	No Pi	WT.SC_to_No_Pi.40	SCtoLowPi	NaN	WT2	lib2019	CAATCGA	66
WT_8_hyb_SCtoLowPi_rep1	WT	hyb	SC_to_No_Pi	8	50	No Pi	WT.SC_to_No_Pi.50	SCtoLowPi	NaN	WT2	lib2019	CACAGAT	90
WT_13_par_SCtoLowPi_rep1	WT	par	SC_to_No_Pi	13	120	No Pi	WT.SC_to_No_Pi.120	SCtoLowPi	NaN	G6	lib2019	CAGTACG	12
WT_16_par_SCtoLowPi_rep1	WT	par	SC_to_No_Pi	16	165	No Pi	WT.SC_to_No_Pi.165	SCtoLowPi	NaN	G6	lib2019	CAGTCAA	84
WT_3_cer_SCtoLowPi_rep1	WT	cer	SC_to_No_Pi	3	5	No Pi	WT.SC_to_No_Pi.5	SCtoLowPi	NaN	G6	lib2019	CATGAAC	49
WT_22_par_SCtoLowPi_rep1	WT	par	SC_to_No_Pi	22	255	No Pi	WT.SC_to_No_Pi.255	SCtoLowPi	NaN	G6	lib2019	CATGCTG	38
WT_24_hyb_SCtoLowPi_rep1	WT	hyb	SC_to_No_Pi	24	285	No Pi	WT.SC_to_No_Pi.285	SCtoLowPi	NaN	WT2	lib2019	CCATGGT	94
WT_2_cer_SCtoLowPi_rep1	WT	cer	SC_to_No_Pi	2	0	SC	WT.SC_to_No_Pi.0	SCtoLowPi	NaN	G6	lib2019	CCTAAGG	25
WT_24_par_SCtoLowPi_rep1	WT	par	SC_to_No_Pi	24	285	No Pi	WT.SC_to_No_Pi.285	SCtoLowPi	NaN	G6	lib2019	CCTGACT	86
WT_4_hyb_SCtoLowPi_rep1	WT	hyb	SC_to_No_Pi	4	10	No Pi	WT.SC_to_No_Pi.10	SCtoLowPi	NaN	WT2	lib2019	CCTGATG	89
WT_12_par_SCtoLowPi_rep1	WT	par	SC_to_No_Pi	12	105	No Pi	WT.SC_to_No_Pi.105	SCtoLowPi	NaN	G6	lib2019	CGAGTCT	83
WT_26_cer_SCtoLowPi_rep1	WT	cer	SC_to_No_Pi	26	315	No Pi	WT.SC_to_No_Pi.315	SCtoLowPi	NaN	G6	lib2019	CGCATAT	31
WT_19_cer_SCtoLowPi_rep1	WT	cer	SC_to_No_Pi	19	210	No Pi	WT.SC_to_No_Pi.210	SCtoLowPi	NaN	G6	lib2019	CGCTACA	53
WT_2_hyb_SCtoLowPi_rep1	WT	hyb	SC_to_No_Pi	2	0	SC	WT.SC_to_No_Pi.0	SCtoLowPi	NaN	WT2	lib2019	CGCTTGA	41
WT_16_cer_SCtoLowPi_rep1	WT	cer	SC_to_No_Pi	16	165	No Pi	WT.SC_to_No_Pi.165	SCtoLowPi	NaN	G6	lib2019	CGGATTA	76
WT_21_par_SCtoLowPi_rep1	WT	par	SC_to_No_Pi	21	240	No Pi	WT.SC_to_No_Pi.240	SCtoLowPi	NaN	G6	lib2019	CGTAACT	14
WT_16_hyb_SCtoLowPi_rep1	WT	hyb	SC_to_No_Pi	16	165	No Pi	WT.SC_to_No_Pi.165	SCtoLowPi	NaN	WT2	lib2019	CGTCAGA	92
WT_15_par_SCtoLowPi_rep1	WT	par	SC_to_No_Pi	15	150	No Pi	WT.SC_to_No_Pi.150	SCtoLowPi	NaN	G6	lib2019	CGTTGAA	60
WT_26_par_SCtoLowPi_rep1	WT	par	SC_to_No_Pi	26	315	No Pi	WT.SC_to_No_Pi.315	SCtoLowPi	NaN	G6	lib2019	CTAAGCG	39
PHO4_1_hyb_SCtoLowPi_rep2	PHO4	hyb	SC_to_No_Pi	1	-5	SC	PHO4.SC_to_No_Pi.-5	SCtoLowPi	NaN	F5	lib2019	CTACAAG	48
WT_17_cer_SCtoLowPi_rep2	WT	cer	SC_to_No_Pi	17	180	No Pi	WT.SC_to_No_Pi.180	SCtoLowPi	NaN	G6	lib2019	CTACAGC	56
WT_18_hyb_SCtoLowPi_rep1	WT	hyb	SC_to_No_Pi	18	195	No Pi	WT.SC_to_No_Pi.195	SCtoLowPi	NaN	WT2	lib2019	CTACGTA	45
WT_10_par_SCtoLowPi_rep1	WT	par	SC_to_No_Pi	10	75	No Pi	WT.SC_to_No_Pi.75	SCtoLowPi	NaN	G6	lib2019	CTAGTGC	35
WT_19_hyb_SCtoLowPi_rep1	WT	hyb	SC_to_No_Pi	19	210	No Pi	WT.SC_to_No_Pi.210	SCtoLowPi	NaN	WT2	lib2019	CTGATGG	69
WT_6_par_SCtoLowPi_rep1	WT	par	SC_to_No_Pi	6	30	No Pi	WT.SC_to_No_Pi.30	SCtoLowPi	NaN	G6	lib2019	CTGTGAG	34
WT_22_cer_SCtoLowPi_rep1	WT	cer	SC_to_No_Pi	22	255	No Pi	WT.SC_to_No_Pi.255	SCtoLowPi	NaN	G6	lib2019	CTTACGG	30
WT_3_par_SCtoLowPi_rep1	WT	par	SC_to_No_Pi	3	5	No Pi	WT.SC_to_No_Pi.5	SCtoLowPi	NaN	G6	lib2019	CTTAGTG	57
WT_12_hyb_SCtoLowPi_rep1	WT	hyb	SC_to_No_Pi	12	105	No Pi	WT.SC_to_No_Pi.105	SCtoLowPi	NaN	WT2	lib2019	CTTCGAA	91
WT_14_par_SCtoLowPi_rep1	WT	par	SC_to_No_Pi	14	135	No Pi	WT.SC_to_No_Pi.135	SCtoLowPi	NaN	G6	lib2019	CTTGCAG	36
WT_14_cer_SCtoLowPi_rep1	WT	cer	SC_to_No_Pi	14	135	No Pi	WT.SC_to_No_Pi.135	SCtoLowPi	NaN	G6	lib2019	GAATAGC	28
WT_8_cer_SCtoLowPi_rep1	WT	cer	SC_to_No_Pi	8	50	No Pi	WT.SC_to_No_Pi.50	SCtoLowPi	NaN	G6	lib2019	GACACTG	74
WT_6_hyb_SCtoLowPi_rep1	WT	hyb	SC_to_No_Pi	6	30	No Pi	WT.SC_to_No_Pi.30	SCtoLowPi	NaN	WT2	lib2019	GATCACA	42
WT_11_cer_SCtoLowPi_rep1	WT	cer	SC_to_No_Pi	11	90	No Pi	WT.SC_to_No_Pi.90	SCtoLowPi	NaN	G6	lib2019	GCAACTA	51
WT_9_par_SCtoLowPi_rep1	WT	par	SC_to_No_Pi	9	60	No Pi	WT.SC_to_No_Pi.60	SCtoLowPi	NaN	G6	lib2019	GCAGTAG	11
PHO4_1_cer_SCtoLowPi_rep2	PHO4	cer	SC_to_No_Pi	1	-5	SC	PHO4.SC_to_No_Pi.-5	SCtoLowPi	NaN	F5	lib2019	GCCTACA	32
WT_10_cer_SCtoLowPi_rep1	WT	cer	SC_to_No_Pi	10	75	No Pi	WT.SC_to_No_Pi.75	SCtoLowPi	NaN	G6	lib2019	GCTGAAT	27
WT_23_hyb_SCtoLowPi_rep1	WT	hyb	SC_to_No_Pi	23	270	No Pi	WT.SC_to_No_Pi.270	SCtoLowPi	NaN	WT2	lib2019	GCTTAGA	70
WT_4_par_SCtoLowPi_rep1	WT	par	SC_to_No_Pi	4	10	No Pi	WT.SC_to_No_Pi.10	SCtoLowPi	NaN	G6	lib2019	GCTTCAT	81
WT_17_hyb_SCtoLowPi_rep1	WT	hyb	SC_to_No_Pi	17	180	No Pi	WT.SC_to_No_Pi.180	SCtoLowPi	NaN	WT2	lib2019	GGAGACT	21
WT_9_hyb_SCtoLowPi_rep1	WT	hyb	SC_to_No_Pi	9	60	No Pi	WT.SC_to_No_Pi.60	SCtoLowPi	NaN	WT2	lib2019	GGATCTA	19
WT_8_par_SCtoLowPi_rep1	WT	par	SC_to_No_Pi	8	50	No Pi	WT.SC_to_No_Pi.50	SCtoLowPi	NaN	G6	lib2019	GGCACTT	82
WT_6_cer_SCtoLowPi_rep1	WT	cer	SC_to_No_Pi	6	30	No Pi	WT.SC_to_No_Pi.30	SCtoLowPi	NaN	G6	lib2019	GGCGATT	26
WT_7_par_SCtoLowPi_rep1	WT	par	SC_to_No_Pi	7	40	No Pi	WT.SC_to_No_Pi.40	SCtoLowPi	NaN	G6	lib2019	GGCTAGA	58
WT_26_hyb_SCtoLowPi_rep1	WT	hyb	SC_to_No_Pi	26	315	No Pi	WT.SC_to_No_Pi.315	SCtoLowPi	NaN	WT2	lib2019	GTAGTCT	47
WT_1_par_SCtoLowPi_rep1	WT	par	SC_to_No_Pi	1	-5	SC	WT.SC_to_No_Pi.-5	SCtoLowPi	NaN	G6	lib2019	GTATGCG	9
WT_10_hyb_SCtoLowPi_rep1	WT	hyb	SC_to_No_Pi	10	75	No Pi	WT.SC_to_No_Pi.75	SCtoLowPi	NaN	WT2	lib2019	GTGCTAT	43
WT_13_hyb_SCtoLowPi_rep1	WT	hyb	SC_to_No_Pi	13	120	No Pi	WT.SC_to_No_Pi.120	SCtoLowPi	NaN	WT2	lib2019	TACCAGT	20
PHO4_17_hyb_SCtoLowPi_rep2	PHO4	hyb	SC_to_No_Pi	17	180	No Pi	PHO4.SC_to_No_Pi.180	SCtoLowPi	NaN	F5	lib2019	TACCGGA	96
WT_27_hyb_SCtoLowPi_rep1	WT	hyb	SC_to_No_Pi	27	330	No Pi	WT.SC_to_No_Pi.330	SCtoLowPi	NaN	WT2	lib2019	TACGAGG	71
WT_29_hyb_SCtoLowPi_rep1	WT	hyb	SC_to_No_Pi	29	360	No Pi	WT.SC_to_No_Pi.360	SCtoLowPi	NaN	WT2	lib2019	TACGTAC	95
WT_7_cer_SCtoLowPi_rep1	WT	cer	SC_to_No_Pi	7	40	No Pi	WT.SC_to_No_Pi.40	SCtoLowPi	NaN	G6	lib2019	TACTAGC	50
WT_1_hyb_SCtoLowPi_rep2	WT	hyb	SC_to_No_Pi	1	-5	SC	WT.SC_to_No_Pi.-5	SCtoLowPi	NaN	WT2	lib2019	TAGCGCA	24
WT_23_par_SCtoLowPi_rep1	WT	par	SC_to_No_Pi	23	270	No Pi	WT.SC_to_No_Pi.270	SCtoLowPi	NaN	G6	lib2019	TATAGGC	62
WT_17_par_SCtoLowPi_rep2	WT	par	SC_to_No_Pi	17	180	No Pi	WT.SC_to_No_Pi.180	SCtoLowPi	NaN	G6	lib2019	TCACAAG	64
WT_19_par_SCtoLowPi_rep1	WT	par	SC_to_No_Pi	19	210	No Pi	WT.SC_to_No_Pi.210	SCtoLowPi	NaN	G6	lib2019	TCGAAGG	61
WT_20_hyb_SCtoLowPi_rep1	WT	hyb	SC_to_No_Pi	20	225	No Pi	WT.SC_to_No_Pi.225	SCtoLowPi	NaN	WT2	lib2019	TCGACTC	93
WT_29_cer_SCtoLowPi_rep1	WT	cer	SC_to_No_Pi	29	360	No Pi	WT.SC_to_No_Pi.360	SCtoLowPi	NaN	G6	lib2019	TCGATAC	79
WT_20_cer_SCtoLowPi_rep1	WT	cer	SC_to_No_Pi	20	225	No Pi	WT.SC_to_No_Pi.225	SCtoLowPi	NaN	G6	lib2019	TCTCGAA	77
WT_29_par_SCtoLowPi_rep1	WT	par	SC_to_No_Pi	29	360	No Pi	WT.SC_to_No_Pi.360	SCtoLowPi	NaN	G6	lib2019	TCTGGAG	87
WT_13_cer_SCtoLowPi_rep1	WT	cer	SC_to_No_Pi	13	120	No Pi	WT.SC_to_No_Pi.120	SCtoLowPi	NaN	G6	lib2019	TCTTCGA	4
PHO4_17_cer_SCtoLowPi_rep2	PHO4	cer	SC_to_No_Pi	17	180	No Pi	PHO4.SC_to_No_Pi.180	SCtoLowPi	NaN	F5	lib2019	TGACGGA	80
WT_17_par_SCtoLowPi_rep1	WT	par	SC_to_No_Pi	17	180	No Pi	WT.SC_to_No_Pi.180	SCtoLowPi	NaN	G6	lib2019	TGCACAA	13
WT_20_par_SCtoLowPi_rep1	WT	par	SC_to_No_Pi	20	225	No Pi	WT.SC_to_No_Pi.225	SCtoLowPi	NaN	G6	lib2019	TGCCTAA	85
WT_3_hyb_SCtoLowPi_rep1	WT	hyb	SC_to_No_Pi	3	5	No Pi	WT.SC_to_No_Pi.5	SCtoLowPi	NaN	WT2	lib2019	TGGAGCA	65
WT_1_hyb_SCtoLowPi_rep1	WT	hyb	SC_to_No_Pi	1	-5	SC	WT.SC_to_No_Pi.-5	SCtoLowPi	NaN	WT2	lib2019	TGTCACG	17
WT_2_par_SCtoLowPi_rep1	WT	par	SC_to_No_Pi	2	0	SC	WT.SC_to_No_Pi.0	SCtoLowPi	NaN	G6	lib2019	TTCAAGC	33
WT_5_hyb_SCtoLowPi_rep1	WT	hyb	SC_to_No_Pi	5	20	No Pi	WT.SC_to_No_Pi.20	SCtoLowPi	NaN	WT2	lib2019	TTCCTGA	18
WT_11_hyb_SCtoLowPi_rep1	WT	hyb	SC_to_No_Pi	11	90	No Pi	WT.SC_to_No_Pi.90	SCtoLowPi	NaN	WT2	lib2019	TTGCAGA	67
WT_11_par_SCtoLowPi_rep1	WT	par	SC_to_No_Pi	11	90	No Pi	WT.SC_to_No_Pi.90	SCtoLowPi	NaN	G6	lib2019	TTGCCAG	59
WT_01_cer_CellCycle_rep1	WT	cer	CellCycle	01	0	YPD	WT.CellCycle.0	CellCycle_rep1	NaN		Offir_20161114_lib1	CTATTCG	1
WT_02_cer_CellCycle_rep1	WT	cer	CellCycle	02	5	HU	WT.CellCycle.5	CellCycle_rep1	NaN		Offir_20161114_lib2	AACTCGT	88
WT_03_cer_CellCycle_rep1	WT	cer	CellCycle	03	10	HU	WT.CellCycle.10	CellCycle_rep1	NaN		Offir_20161114_lib1	ACACGTG	3
WT_04_cer_CellCycle_rep1	WT	cer	CellCycle	04	20	HU	WT.CellCycle.20	CellCycle_rep1	NaN		Offir_20161114_lib1	TCTTCGA	4
WT_05_cer_CellCycle_rep1	WT	cer	CellCycle	05	30	HU	WT.CellCycle.30	CellCycle_rep1	NaN		Offir_20161114_lib1	AGCACTG	5
WT_06_cer_CellCycle_rep1	WT	cer	CellCycle	06	60	HU	WT.CellCycle.60	CellCycle_rep1	NaN		Offir_20161114_lib1	AGTGCGT	6
WT_07_cer_CellCycle_rep1	WT	cer	CellCycle	07	120	HU	WT.CellCycle.120	CellCycle_rep1	NaN		Offir_20161114_lib1	AACGTTC	7
WT_08_cer_CellCycle_rep1	WT	cer	CellCycle	08	125	YPD	WT.CellCycle.125	CellCycle_rep1	NaN		Offir_20161114_lib1	ATCTGTC	8
WT_09_cer_CellCycle_rep1	WT	cer	CellCycle	09	130	YPD	WT.CellCycle.130	CellCycle_rep1	NaN		Offir_20161114_lib1	GTATGCG	9
WT_10_cer_CellCycle_rep1	WT	cer	CellCycle	10	135	YPD	WT.CellCycle.135	CellCycle_rep1	NaN		Offir_20161114_lib1	ATCTGCA	10
WT_11_cer_CellCycle_rep1	WT	cer	CellCycle	11	140	YPD	WT.CellCycle.140	CellCycle_rep1	NaN		Offir_20161114_lib1	GCAGTAG	11
WT_12_cer_CellCycle_rep1	WT	cer	CellCycle	12	145	YPD	WT.CellCycle.145	CellCycle_rep1	NaN		Offir_20161114_lib1	CAGTACG	12
WT_13_cer_CellCycle_rep1	WT	cer	CellCycle	13	150	YPD	WT.CellCycle.150	CellCycle_rep1	NaN		Offir_20161114_lib1	TGCACAA	13
WT_14_cer_CellCycle_rep1	WT	cer	CellCycle	14	155	YPD	WT.CellCycle.155	CellCycle_rep1	NaN		Offir_20161114_lib1	CGTAACT	14
WT_15_cer_CellCycle_rep1	WT	cer	CellCycle	15	160	YPD	WT.CellCycle.160	CellCycle_rep1	NaN		Offir_20161114_lib1	AGCTCAA	15
WT_16_cer_CellCycle_rep1	WT	cer	CellCycle	16	165	YPD	WT.CellCycle.165	CellCycle_rep1	NaN		Offir_20161114_lib1	ATAACCG	16
WT_17_cer_CellCycle_rep1	WT	cer	CellCycle	17	170	YPD	WT.CellCycle.170	CellCycle_rep1	NaN		Offir_20161114_lib1	TGTCACG	17
WT_18_cer_CellCycle_rep1	WT	cer	CellCycle	18	175	YPD	WT.CellCycle.175	CellCycle_rep1	NaN		Offir_20161114_lib1	TTCCTGA	18
WT_19_cer_CellCycle_rep1	WT	cer	CellCycle	19	180	YPD	WT.CellCycle.180	CellCycle_rep1	NaN		Offir_20161114_lib1	GGATCTA	19
WT_20_cer_CellCycle_rep1	WT	cer	CellCycle	20	185	YPD	WT.CellCycle.185	CellCycle_rep1	NaN		Offir_20161114_lib1	TACCAGT	20
WT_21_cer_CellCycle_rep1	WT	cer	CellCycle	21	190	YPD	WT.CellCycle.190	CellCycle_rep1	NaN		Offir_20161114_lib1	GGAGACT	21
WT_22_cer_CellCycle_rep1	WT	cer	CellCycle	22	195	YPD	WT.CellCycle.195	CellCycle_rep1	NaN		Offir_20161114_lib1	AGCTAGT	22
WT_23_cer_CellCycle_rep1	WT	cer	CellCycle	23	200	YPD	WT.CellCycle.200	CellCycle_rep1	NaN		Offir_20161114_lib1	ACTTGGC	23
WT_24_cer_CellCycle_rep1	WT	cer	CellCycle	24	205	YPD	WT.CellCycle.205	CellCycle_rep1	NaN		Offir_20161114_lib1	TAGCGCA	24
WT_25_cer_CellCycle_rep1	WT	cer	CellCycle	25	210	YPD	WT.CellCycle.210	CellCycle_rep1	NaN		Offir_20161114_lib1	CCTAAGG	25
WT_26_cer_CellCycle_rep1	WT	cer	CellCycle	26	215	YPD	WT.CellCycle.215	CellCycle_rep1	NaN		Offir_20161114_lib1	GGCGATT	26
WT_27_cer_CellCycle_rep1	WT	cer	CellCycle	27	220	YPD	WT.CellCycle.220	CellCycle_rep1	NaN		Offir_20161114_lib1	GCTGAAT	27
WT_28_cer_CellCycle_rep1	WT	cer	CellCycle	28	225	YPD	WT.CellCycle.225	CellCycle_rep1	NaN		Offir_20161114_lib1	GAATAGC	28
WT_29_cer_CellCycle_rep1	WT	cer	CellCycle	29	230	YPD	WT.CellCycle.230	CellCycle_rep1	NaN		Offir_20161114_lib1	ACTGCAG	29
WT_30_cer_CellCycle_rep1	WT	cer	CellCycle	30	235	YPD	WT.CellCycle.235	CellCycle_rep1	NaN		Offir_20161114_lib1	CTTACGG	30
WT_31_cer_CellCycle_rep1	WT	cer	CellCycle	31	240	YPD	WT.CellCycle.240	CellCycle_rep1	NaN		Offir_20161114_lib1	CGCATAT	31
WT_32_cer_CellCycle_rep1	WT	cer	CellCycle	32	245	YPD	WT.CellCycle.245	CellCycle_rep1	NaN		Offir_20161114_lib2	TCTGGAG	87
WT_33_cer_CellCycle_rep1	WT	cer	CellCycle	33	250	YPD	WT.CellCycle.250	CellCycle_rep1	NaN		Offir_20161114_lib1	TTCAAGC	33
WT_34_cer_CellCycle_rep1	WT	cer	CellCycle	34	255	YPD	WT.CellCycle.255	CellCycle_rep1	NaN		Offir_20161114_lib1	CTGTGAG	34
WT_35_cer_CellCycle_rep1	WT	cer	CellCycle	35	260	YPD	WT.CellCycle.260	CellCycle_rep1	NaN		Offir_20161114_lib1	CTAGTGC	35
WT_36_cer_CellCycle_rep1	WT	cer	CellCycle	36	265	YPD	WT.CellCycle.265	CellCycle_rep1	NaN		Offir_20161114_lib1	CTTGCAG	36
WT_37_cer_CellCycle_rep1	WT	cer	CellCycle	37	270	YPD	WT.CellCycle.270	CellCycle_rep1	NaN		Offir_20161114_lib1	ATGCCAA	37
WT_38_cer_CellCycle_rep1	WT	cer	CellCycle	38	275	YPD	WT.CellCycle.275	CellCycle_rep1	NaN		Offir_20161114_lib1	CATGCTG	38
WT_39_hyb_CellCycle_rep1	WT	hyb	CellCycle	39	280	YPD	WT.CellCycle.280	CellCycle_rep1	NaN		Offir_20161114_lib1	CTAAGCG	39
WT_40_cer_CellCycle_rep1	WT	cer	CellCycle	40	285	YPD	WT.CellCycle.285	CellCycle_rep1	NaN		Offir_20161114_lib1	AGCCGAT	40
WT_41_cer_CellCycle_rep1	WT	cer	CellCycle	41	290	YPD	WT.CellCycle.290	CellCycle_rep1	NaN		Offir_20161114_lib1	CGCTTGA	41
WT_42_cer_CellCycle_rep1	WT	cer	CellCycle	42	295	YPD	WT.CellCycle.295	CellCycle_rep1	NaN		Offir_20161114_lib1	GATCACA	42
WT_43_cer_CellCycle_rep1	WT	cer	CellCycle	43	300	YPD	WT.CellCycle.300	CellCycle_rep1	NaN		Offir_20161114_lib1	GTGCTAT	43
WT_01_hyb_CellCycle_rep1	WT	hyb	CellCycle	01	0	YPD	WT.CellCycle.0	CellCycle_rep1	NaN		Offir_20161114_lib1	AGGCTAG	44
WT_02_hyb_CellCycle_rep1	WT	hyb	CellCycle	02	5	HU	WT.CellCycle.5	CellCycle_rep1	NaN		Offir_20161114_lib1	CTACGTA	45
WT_03_hyb_CellCycle_rep1	WT	hyb	CellCycle	03	10	HU	WT.CellCycle.10	CellCycle_rep1	NaN		Offir_20161114_lib1	ATAGCGA	46
WT_04_hyb_CellCycle_rep1	WT	hyb	CellCycle	04	20	HU	WT.CellCycle.20	CellCycle_rep1	NaN		Offir_20161114_lib1	GTAGTCT	47
WT_05_hyb_CellCycle_rep1	WT	hyb	CellCycle	05	30	HU	WT.CellCycle.30	CellCycle_rep1	NaN		Offir_20161114_lib1	CTACAAG	48
WT_06_hyb_CellCycle_rep1	WT	hyb	CellCycle	06	60	HU	WT.CellCycle.60	CellCycle_rep1	NaN		Offir_20161114_lib1	CATGAAC	49
WT_07_hyb_CellCycle_rep1	WT	hyb	CellCycle	07	120	HU	WT.CellCycle.120	CellCycle_rep1	NaN		Offir_20161114_lib1	TACTAGC	50
WT_08_hyb_CellCycle_rep1	WT	hyb	CellCycle	08	125	YPD	WT.CellCycle.125	CellCycle_rep1	NaN		Offir_20161114_lib1	GCAACTA	51
WT_09_hyb_CellCycle_rep1	WT	hyb	CellCycle	09	130	YPD	WT.CellCycle.130	CellCycle_rep1	NaN		Offir_20161114_lib1	AGGCGTT	52
WT_10_hyb_CellCycle_rep1	WT	hyb	CellCycle	10	135	YPD	WT.CellCycle.135	CellCycle_rep1	NaN		Offir_20161114_lib1	CGCTACA	53
WT_11_hyb_CellCycle_rep1	WT	hyb	CellCycle	11	140	YPD	WT.CellCycle.140	CellCycle_rep1	NaN		Offir_20161114_lib1	AAGGTAC	54
WT_12_hyb_CellCycle_rep1	WT	hyb	CellCycle	12	145	YPD	WT.CellCycle.145	CellCycle_rep1	NaN		Offir_20161114_lib1	AAGCCTT	55
WT_13_hyb_CellCycle_rep1	WT	hyb	CellCycle	13	150	YPD	WT.CellCycle.150	CellCycle_rep1	NaN		Offir_20161114_lib1	CTACAGC	56
WT_14_hyb_CellCycle_rep1	WT	hyb	CellCycle	14	155	YPD	WT.CellCycle.155	CellCycle_rep1	NaN		Offir_20161114_lib1	CTTAGTG	57
WT_15_hyb_CellCycle_rep1	WT	hyb	CellCycle	15	160	YPD	WT.CellCycle.160	CellCycle_rep1	NaN		Offir_20161114_lib1	GGCTAGA	58
WT_16_hyb_CellCycle_rep1	WT	hyb	CellCycle	16	165	YPD	WT.CellCycle.165	CellCycle_rep1	NaN		Offir_20161114_lib1	TTGCCAG	59
WT_17_hyb_CellCycle_rep1	WT	hyb	CellCycle	17	170	YPD	WT.CellCycle.170	CellCycle_rep1	NaN		Offir_20161114_lib1	CGTTGAA	60
WT_18_hyb_CellCycle_rep1	WT	hyb	CellCycle	18	175	YPD	WT.CellCycle.175	CellCycle_rep1	NaN		Offir_20161114_lib1	TCGAAGG	61
WT_19_hyb_CellCycle_rep1	WT	hyb	CellCycle	19	180	YPD	WT.CellCycle.180	CellCycle_rep1	NaN		Offir_20161114_lib1	TATAGGC	62
WT_20_hyb_CellCycle_rep1	WT	hyb	CellCycle	20	185	YPD	WT.CellCycle.185	CellCycle_rep1	NaN		Offir_20161114_lib1	AACAGCT	63
WT_21_hyb_CellCycle_rep1	WT	hyb	CellCycle	21	190	YPD	WT.CellCycle.190	CellCycle_rep1	NaN		Offir_20161114_lib1	TCACAAG	64
WT_22_hyb_CellCycle_rep1	WT	hyb	CellCycle	22	195	YPD	WT.CellCycle.195	CellCycle_rep1	NaN		Offir_20161114_lib1	TGGAGCA	65
WT_23_hyb_CellCycle_rep1	WT	hyb	CellCycle	23	200	YPD	WT.CellCycle.200	CellCycle_rep1	NaN		Offir_20161114_lib1	CAATCGA	66
WT_24_hyb_CellCycle_rep1	WT	hyb	CellCycle	24	205	YPD	WT.CellCycle.205	CellCycle_rep1	NaN		Offir_20161114_lib1	TTGCAGA	67
WT_25_hyb_CellCycle_rep1	WT	hyb	CellCycle	25	210	YPD	WT.CellCycle.210	CellCycle_rep1	NaN		Offir_20161114_lib1	ACCGATC	68
WT_26_hyb_CellCycle_rep1	WT	hyb	CellCycle	26	215	YPD	WT.CellCycle.215	CellCycle_rep1	NaN		Offir_20161114_lib1	CTGATGG	69
WT_27_hyb_CellCycle_rep1	WT	hyb	CellCycle	27	220	YPD	WT.CellCycle.220	CellCycle_rep1	NaN		Offir_20161114_lib1	GCTTAGA	70
WT_28_hyb_CellCycle_rep1	WT	hyb	CellCycle	28	225	YPD	WT.CellCycle.225	CellCycle_rep1	NaN		Offir_20161114_lib1	TACGAGG	71
WT_29_hyb_CellCycle_rep1	WT	hyb	CellCycle	29	230	YPD	WT.CellCycle.230	CellCycle_rep1	NaN		Offir_20161114_lib1	AACGGTG	72
WT_30_hyb_CellCycle_rep1	WT	hyb	CellCycle	30	235	YPD	WT.CellCycle.235	CellCycle_rep1	NaN		Offir_20161114_lib1	AGTCTCC	73
WT_31_hyb_CellCycle_rep1	WT	hyb	CellCycle	31	240	YPD	WT.CellCycle.240	CellCycle_rep1	NaN		Offir_20161114_lib1	GACACTG	74
WT_32_hyb_CellCycle_rep1	WT	hyb	CellCycle	32	245	YPD	WT.CellCycle.245	CellCycle_rep1	NaN		Offir_20161114_lib1	ATCAGGC	75
WT_33_hyb_CellCycle_rep1	WT	hyb	CellCycle	33	250	YPD	WT.CellCycle.250	CellCycle_rep1	NaN		Offir_20161114_lib1	CGGATTA	76
WT_34_hyb_CellCycle_rep1	WT	hyb	CellCycle	34	255	YPD	WT.CellCycle.255	CellCycle_rep1	NaN		Offir_20161114_lib1	TCTCGAA	77
WT_35_hyb_CellCycle_rep1	WT	hyb	CellCycle	35	260	YPD	WT.CellCycle.260	CellCycle_rep1	NaN		Offir_20161114_lib1	ACGCTAT	78
WT_36_hyb_CellCycle_rep1	WT	hyb	CellCycle	36	265	YPD	WT.CellCycle.265	CellCycle_rep1	NaN		Offir_20161114_lib1	TCGATAC	79
WT_37_hyb_CellCycle_rep1	WT	hyb	CellCycle	37	270	YPD	WT.CellCycle.270	CellCycle_rep1	NaN		Offir_20161114_lib1	TGACGGA	80
WT_38_hyb_CellCycle_rep1	WT	hyb	CellCycle	38	275	YPD	WT.CellCycle.275	CellCycle_rep1	NaN		Offir_20161114_lib1	GCTTCAT	81
WT_39_cer_CellCycle_rep1	WT	cer	CellCycle	39	280	YPD	WT.CellCycle.280	CellCycle_rep1	NaN		Offir_20161114_lib1	GGCACTT	82
WT_40_hyb_CellCycle_rep1	WT	hyb	CellCycle	40	285	YPD	WT.CellCycle.285	CellCycle_rep1	NaN		Offir_20161114_lib1	CGAGTCT	83
WT_41_hyb_CellCycle_rep1	WT	hyb	CellCycle	41	290	YPD	WT.CellCycle.290	CellCycle_rep1	NaN		Offir_20161114_lib1	CAGTCAA	84
WT_42_hyb_CellCycle_rep1	WT	hyb	CellCycle	42	295	YPD	WT.CellCycle.295	CellCycle_rep1	NaN		Offir_20161114_lib1	TGCCTAA	85
WT_43_hyb_CellCycle_rep1	WT	hyb	CellCycle	43	300	YPD	WT.CellCycle.300	CellCycle_rep1	NaN		Offir_20161114_lib1	CCTGACT	86
WT_01_par_CellCycle_rep1	WT	par	CellCycle	01	0	YPD	WT.CellCycle.0	CellCycle_rep1	NaN		Offir_20161114_lib2	CTATTCG	1
WT_02_par_CellCycle_rep1	WT	par	CellCycle	02	5	HU	WT.CellCycle.5	CellCycle_rep1	NaN		Offir_20161114_lib2	ACTCAGG	2
WT_03_par_CellCycle_rep1	WT	par	CellCycle	03	10	HU	WT.CellCycle.10	CellCycle_rep1	NaN		Offir_20161114_lib2	ACACGTG	3
WT_04_par_CellCycle_rep1	WT	par	CellCycle	04	20	HU	WT.CellCycle.20	CellCycle_rep1	NaN		Offir_20161114_lib2	TCTTCGA	4
WT_05_par_CellCycle_rep1	WT	par	CellCycle	05	30	HU	WT.CellCycle.30	CellCycle_rep1	NaN		Offir_20161114_lib2	AGCACTG	5
WT_06_par_CellCycle_rep1	WT	par	CellCycle	06	60	HU	WT.CellCycle.60	CellCycle_rep1	NaN		Offir_20161114_lib2	AGTGCGT	6
WT_07_par_CellCycle_rep1	WT	par	CellCycle	07	120	HU	WT.CellCycle.120	CellCycle_rep1	NaN		Offir_20161114_lib2	AACGTTC	7
WT_08_par_CellCycle_rep1	WT	par	CellCycle	08	125	YPD	WT.CellCycle.125	CellCycle_rep1	NaN		Offir_20161114_lib2	ATCTGTC	8
WT_09_par_CellCycle_rep1	WT	par	CellCycle	09	130	YPD	WT.CellCycle.130	CellCycle_rep1	NaN		Offir_20161114_lib2	GTATGCG	9
WT_10_par_CellCycle_rep1	WT	par	CellCycle	10	135	YPD	WT.CellCycle.135	CellCycle_rep1	NaN		Offir_20161114_lib2	ATCTGCA	10
WT_11_par_CellCycle_rep1	WT	par	CellCycle	11	140	YPD	WT.CellCycle.140	CellCycle_rep1	NaN		Offir_20161114_lib2	GCAGTAG	11
WT_12_par_CellCycle_rep1	WT	par	CellCycle	12	145	YPD	WT.CellCycle.145	CellCycle_rep1	NaN		Offir_20161114_lib2	CAGTACG	12
WT_13_par_CellCycle_rep1	WT	par	CellCycle	13	150	YPD	WT.CellCycle.150	CellCycle_rep1	NaN		Offir_20161114_lib2	TGCACAA	13
WT_14_par_CellCycle_rep1	WT	par	CellCycle	14	155	YPD	WT.CellCycle.155	CellCycle_rep1	NaN		Offir_20161114_lib2	CGTAACT	14
WT_15_par_CellCycle_rep1	WT	par	CellCycle	15	160	YPD	WT.CellCycle.160	CellCycle_rep1	NaN		Offir_20161114_lib2	AGCTCAA	15
WT_16_par_CellCycle_rep1	WT	par	CellCycle	16	165	YPD	WT.CellCycle.165	CellCycle_rep1	NaN		Offir_20161114_lib2	ATAACCG	16
WT_17_par_CellCycle_rep1	WT	par	CellCycle	17	170	YPD	WT.CellCycle.170	CellCycle_rep1	NaN		Offir_20161114_lib2	TGTCACG	17
WT_18_par_CellCycle_rep1	WT	par	CellCycle	18	175	YPD	WT.CellCycle.175	CellCycle_rep1	NaN		Offir_20161114_lib2	TTCCTGA	18
WT_19_par_CellCycle_rep1	WT	par	CellCycle	19	180	YPD	WT.CellCycle.180	CellCycle_rep1	NaN		Offir_20161114_lib2	GGATCTA	19
WT_20_par_CellCycle_rep1	WT	par	CellCycle	20	185	YPD	WT.CellCycle.185	CellCycle_rep1	NaN		Offir_20161114_lib2	TACCAGT	20
WT_21_par_CellCycle_rep1	WT	par	CellCycle	21	190	YPD	WT.CellCycle.190	CellCycle_rep1	NaN		Offir_20161114_lib2	GGAGACT	21
WT_22_par_CellCycle_rep1	WT	par	CellCycle	22	195	YPD	WT.CellCycle.195	CellCycle_rep1	NaN		Offir_20161114_lib2	AGCTAGT	22
WT_23_par_CellCycle_rep1	WT	par	CellCycle	23	200	YPD	WT.CellCycle.200	CellCycle_rep1	NaN		Offir_20161114_lib2	ACTTGGC	23
WT_24_par_CellCycle_rep1	WT	par	CellCycle	24	205	YPD	WT.CellCycle.205	CellCycle_rep1	NaN		Offir_20161114_lib2	TAGCGCA	24
WT_25_par_CellCycle_rep1	WT	par	CellCycle	25	210	YPD	WT.CellCycle.210	CellCycle_rep1	NaN		Offir_20161114_lib2	CCTAAGG	25
WT_26_par_CellCycle_rep1	WT	par	CellCycle	26	215	YPD	WT.CellCycle.215	CellCycle_rep1	NaN		Offir_20161114_lib2	GGCGATT	26
WT_27_par_CellCycle_rep1	WT	par	CellCycle	27	220	YPD	WT.CellCycle.220	CellCycle_rep1	NaN		Offir_20161114_lib2	GCTGAAT	27
WT_28_par_CellCycle_rep1	WT	par	CellCycle	28	225	YPD	WT.CellCycle.225	CellCycle_rep1	NaN		Offir_20161114_lib2	GAATAGC	28
WT_29_par_CellCycle_rep1	WT	par	CellCycle	29	230	YPD	WT.CellCycle.230	CellCycle_rep1	NaN		Offir_20161114_lib2	ACTGCAG	29
WT_30_par_CellCycle_rep1	WT	par	CellCycle	30	235	YPD	WT.CellCycle.235	CellCycle_rep1	NaN		Offir_20161114_lib2	CTTACGG	30
WT_31_par_CellCycle_rep1	WT	par	CellCycle	31	240	YPD	WT.CellCycle.240	CellCycle_rep1	NaN		Offir_20161114_lib2	CGCATAT	31
WT_32_par_CellCycle_rep1	WT	par	CellCycle	32	245	YPD	WT.CellCycle.245	CellCycle_rep1	NaN		Offir_20161114_lib2	GCCTACA	32
WT_33_par_CellCycle_rep1	WT	par	CellCycle	33	250	YPD	WT.CellCycle.250	CellCycle_rep1	NaN		Offir_20161114_lib2	TTCAAGC	33
WT_34_par_CellCycle_rep1	WT	par	CellCycle	34	255	YPD	WT.CellCycle.255	CellCycle_rep1	NaN		Offir_20161114_lib2	CTGTGAG	34
WT_35_par_CellCycle_rep1	WT	par	CellCycle	35	260	YPD	WT.CellCycle.260	CellCycle_rep1	NaN		Offir_20161114_lib2	CTAGTGC	35
WT_36_par_CellCycle_rep1	WT	par	CellCycle	36	265	YPD	WT.CellCycle.265	CellCycle_rep1	NaN		Offir_20161114_lib2	CTTGCAG	36
WT_37_par_CellCycle_rep1	WT	par	CellCycle	37	270	YPD	WT.CellCycle.270	CellCycle_rep1	NaN		Offir_20161114_lib2	ATGCCAA	37
WT_38_par_CellCycle_rep1	WT	par	CellCycle	38	275	YPD	WT.CellCycle.275	CellCycle_rep1	NaN		Offir_20161114_lib2	CATGCTG	38
WT_39_par_CellCycle_rep1	WT	par	CellCycle	39	280	YPD	WT.CellCycle.280	CellCycle_rep1	NaN		Offir_20161114_lib2	CTAAGCG	39
WT_40_par_CellCycle_rep1	WT	par	CellCycle	40	285	YPD	WT.CellCycle.285	CellCycle_rep1	NaN		Offir_20161114_lib2	AGCCGAT	40
WT_41_par_CellCycle_rep1	WT	par	CellCycle	41	290	YPD	WT.CellCycle.290	CellCycle_rep1	NaN		Offir_20161114_lib2	CGCTTGA	41
WT_42_par_CellCycle_rep1	WT	par	CellCycle	42	295	YPD	WT.CellCycle.295	CellCycle_rep1	NaN		Offir_20161114_lib2	GATCACA	42
WT_43_par_CellCycle_rep1	WT	par	CellCycle	43	300	YPD	WT.CellCycle.300	CellCycle_rep1	NaN		Offir_20161114_lib2	GTGCTAT	43
WT_01_cer_CellCycle_rep2	WT	cer	CellCycle	01	0	YPD	WT.CellCycle.0	CellCycle_rep2	NaN		Offir_20170815	CTATTCG	1
WT_02_cer_CellCycle_rep2	WT	cer	CellCycle	02	5	HU	WT.CellCycle.5	CellCycle_rep2	NaN		Offir_20170815	ACTCAGG	2
WT_03_cer_CellCycle_rep2	WT	cer	CellCycle	03	10	HU	WT.CellCycle.10	CellCycle_rep2	NaN		Offir_20170815	ACACGTG	3
WT_04_cer_CellCycle_rep2	WT	cer	CellCycle	04	20	HU	WT.CellCycle.20	CellCycle_rep2	NaN		Offir_20170815	TCTTCGA	4
WT_05_cer_CellCycle_rep2	WT	cer	CellCycle	05	30	HU	WT.CellCycle.30	CellCycle_rep2	NaN		Offir_20170815	AGCACTG	5
WT_06_cer_CellCycle_rep2	WT	cer	CellCycle	06	60	HU	WT.CellCycle.60	CellCycle_rep2	NaN		Offir_20170815	AGTGCGT	6
WT_07_cer_CellCycle_rep2	WT	cer	CellCycle	07	120	HU	WT.CellCycle.120	CellCycle_rep2	NaN		Offir_20170815	AACGTTC	7
WT_08_cer_CellCycle_rep2	WT	cer	CellCycle	08	125	YPD	WT.CellCycle.125	CellCycle_rep2	NaN		Offir_20170815	ATCTGTC	8
WT_09_cer_CellCycle_rep2	WT	cer	CellCycle	09	130	YPD	WT.CellCycle.130	CellCycle_rep2	NaN		Offir_20170815	GTATGCG	9
WT_10_cer_CellCycle_rep2	WT	cer	CellCycle	10	135	YPD	WT.CellCycle.135	CellCycle_rep2	NaN		Offir_20170815	ATCTGCA	10
WT_11_cer_CellCycle_rep2	WT	cer	CellCycle	11	140	YPD	WT.CellCycle.140	CellCycle_rep2	NaN		Offir_20170815	GCAGTAG	11
WT_12_cer_CellCycle_rep2	WT	cer	CellCycle	12	145	YPD	WT.CellCycle.145	CellCycle_rep2	NaN		Offir_20170815	CAGTACG	12
WT_13_cer_CellCycle_rep2	WT	cer	CellCycle	13	150	YPD	WT.CellCycle.150	CellCycle_rep2	NaN		Offir_20170815	TGCACAA	13
WT_14_cer_CellCycle_rep2	WT	cer	CellCycle	14	155	YPD	WT.CellCycle.155	CellCycle_rep2	NaN		Offir_20170815	CGTAACT	14
WT_15_cer_CellCycle_rep2	WT	cer	CellCycle	15	160	YPD	WT.CellCycle.160	CellCycle_rep2	NaN		Offir_20170815	AGCTCAA	15
WT_16_cer_CellCycle_rep2	WT	cer	CellCycle	16	165	YPD	WT.CellCycle.165	CellCycle_rep2	NaN		Offir_20170815	ATAACCG	16
WT_17_cer_CellCycle_rep2	WT	cer	CellCycle	17	170	YPD	WT.CellCycle.170	CellCycle_rep2	NaN		Offir_20170815	TGTCACG	17
WT_18_cer_CellCycle_rep2	WT	cer	CellCycle	18	175	YPD	WT.CellCycle.175	CellCycle_rep2	NaN		Offir_20170815	TTCCTGA	18
WT_19_cer_CellCycle_rep2	WT	cer	CellCycle	19	180	YPD	WT.CellCycle.180	CellCycle_rep2	NaN		Offir_20170815	GGATCTA	19
WT_20_cer_CellCycle_rep2	WT	cer	CellCycle	20	185	YPD	WT.CellCycle.185	CellCycle_rep2	NaN		Offir_20170815	TACCAGT	20
WT_21_cer_CellCycle_rep2	WT	cer	CellCycle	21	190	YPD	WT.CellCycle.190	CellCycle_rep2	NaN		Offir_20170815	GGAGACT	21
WT_22_cer_CellCycle_rep2	WT	cer	CellCycle	22	195	YPD	WT.CellCycle.195	CellCycle_rep2	NaN		Offir_20170815	AGCTAGT	22
WT_23_cer_CellCycle_rep2	WT	cer	CellCycle	23	200	YPD	WT.CellCycle.200	CellCycle_rep2	NaN		Offir_20170815	ACTTGGC	23
WT_24_cer_CellCycle_rep2	WT	cer	CellCycle	24	205	YPD	WT.CellCycle.205	CellCycle_rep2	NaN		Offir_20170815	TAGCGCA	24
WT_25_cer_CellCycle_rep2	WT	cer	CellCycle	25	210	YPD	WT.CellCycle.210	CellCycle_rep2	NaN		Offir_20170815	CCTAAGG	25
WT_26_cer_CellCycle_rep2	WT	cer	CellCycle	26	215	YPD	WT.CellCycle.215	CellCycle_rep2	NaN		Offir_20170815	GGCGATT	26
WT_27_cer_CellCycle_rep2	WT	cer	CellCycle	27	220	YPD	WT.CellCycle.220	CellCycle_rep2	NaN		Offir_20170815	GCTGAAT	27
WT_28_cer_CellCycle_rep2	WT	cer	CellCycle	28	225	YPD	WT.CellCycle.225	CellCycle_rep2	NaN		Offir_20170815	GAATAGC	28
WT_29_cer_CellCycle_rep2	WT	cer	CellCycle	29	230	YPD	WT.CellCycle.230	CellCycle_rep2	NaN		Offir_20170815	ACTGCAG	29
WT_30_cer_CellCycle_rep2	WT	cer	CellCycle	30	235	YPD	WT.CellCycle.235	CellCycle_rep2	NaN		Offir_20170815	CTTACGG	30
WT_31_cer_CellCycle_rep2	WT	cer	CellCycle	31	240	YPD	WT.CellCycle.240	CellCycle_rep2	NaN		Offir_20170815	CGCATAT	31
WT_32_cer_CellCycle_rep2	WT	cer	CellCycle	32	245	YPD	WT.CellCycle.245	CellCycle_rep2	NaN		Offir_20170815	GCCTACA	32
WT_33_cer_CellCycle_rep2	WT	cer	CellCycle	33	250	YPD	WT.CellCycle.250	CellCycle_rep2	NaN		Offir_20170815	TTCAAGC	33
WT_34_cer_CellCycle_rep2	WT	cer	CellCycle	34	255	YPD	WT.CellCycle.255	CellCycle_rep2	NaN		Offir_20170815	CTGTGAG	34
WT_35_cer_CellCycle_rep2	WT	cer	CellCycle	35	260	YPD	WT.CellCycle.260	CellCycle_rep2	NaN		Offir_20170815	CTAGTGC	35
WT_36_cer_CellCycle_rep2	WT	cer	CellCycle	36	265	YPD	WT.CellCycle.265	CellCycle_rep2	NaN		Offir_20170815	CTTGCAG	36
WT_37_cer_CellCycle_rep2	WT	cer	CellCycle	37	270	YPD	WT.CellCycle.270	CellCycle_rep2	NaN		Offir_20170815	ATGCCAA	37
WT_38_cer_CellCycle_rep2	WT	cer	CellCycle	38	275	YPD	WT.CellCycle.275	CellCycle_rep2	NaN		Offir_20170815	CATGCTG	38
WT_39_hyb_CellCycle_rep2	WT	hyb	CellCycle	39	280	YPD	WT.CellCycle.280	CellCycle_rep2	NaN		Offir_20170815	CTAAGCG	39
WT_40_cer_CellCycle_rep2	WT	cer	CellCycle	40	285	YPD	WT.CellCycle.285	CellCycle_rep2	NaN		Offir_20170815	AGCCGAT	40
WT_41_cer_CellCycle_rep2	WT	cer	CellCycle	41	290	YPD	WT.CellCycle.290	CellCycle_rep2	NaN		Offir_20170815	CGCTTGA	41
WT_42_cer_CellCycle_rep2	WT	cer	CellCycle	42	295	YPD	WT.CellCycle.295	CellCycle_rep2	NaN		Offir_20170815	GATCACA	42
WT_43_cer_CellCycle_rep2	WT	cer	CellCycle	43	300	YPD	WT.CellCycle.300	CellCycle_rep2	NaN		Offir_20170815	GTGCTAT	43
WT_01_hyb_CellCycle_rep2	WT	hyb	CellCycle	01	0	YPD	WT.CellCycle.0	CellCycle_rep2	NaN		Offir_20170815	AGGCTAG	44
WT_02_hyb_CellCycle_rep2	WT	hyb	CellCycle	02	5	HU	WT.CellCycle.5	CellCycle_rep2	NaN		Offir_20170815	CTACGTA	45
WT_03_hyb_CellCycle_rep2	WT	hyb	CellCycle	03	10	HU	WT.CellCycle.10	CellCycle_rep2	NaN		Offir_20170815	ATAGCGA	46
WT_04_hyb_CellCycle_rep2	WT	hyb	CellCycle	04	20	HU	WT.CellCycle.20	CellCycle_rep2	NaN		Offir_20170815	GTAGTCT	47
WT_05_hyb_CellCycle_rep2	WT	hyb	CellCycle	05	30	HU	WT.CellCycle.30	CellCycle_rep2	NaN		Offir_20170815	CTACAAG	48
WT_06_hyb_CellCycle_rep2	WT	hyb	CellCycle	06	60	HU	WT.CellCycle.60	CellCycle_rep2	NaN		Offir_20170815	CATGAAC	49
WT_07_hyb_CellCycle_rep2	WT	hyb	CellCycle	07	120	HU	WT.CellCycle.120	CellCycle_rep2	NaN		Offir_20170815	TACTAGC	50
WT_08_hyb_CellCycle_rep2	WT	hyb	CellCycle	08	125	YPD	WT.CellCycle.125	CellCycle_rep2	NaN		Offir_20170815	GCAACTA	51
WT_09_hyb_CellCycle_rep2	WT	hyb	CellCycle	09	130	YPD	WT.CellCycle.130	CellCycle_rep2	NaN		Offir_20170815	AGGCGTT	52
WT_10_hyb_CellCycle_rep2	WT	hyb	CellCycle	10	135	YPD	WT.CellCycle.135	CellCycle_rep2	NaN		Offir_20170815	CGCTACA	53
WT_11_hyb_CellCycle_rep2	WT	hyb	CellCycle	11	140	YPD	WT.CellCycle.140	CellCycle_rep2	NaN		Offir_20170815	AAGGTAC	54
WT_12_hyb_CellCycle_rep2	WT	hyb	CellCycle	12	145	YPD	WT.CellCycle.145	CellCycle_rep2	NaN		Offir_20170815	AAGCCTT	55
WT_13_hyb_CellCycle_rep2	WT	hyb	CellCycle	13	150	YPD	WT.CellCycle.150	CellCycle_rep2	NaN		Offir_20170815	CTACAGC	56
WT_14_hyb_CellCycle_rep2	WT	hyb	CellCycle	14	155	YPD	WT.CellCycle.155	CellCycle_rep2	NaN		Offir_20170815	CTTAGTG	57
WT_15_hyb_CellCycle_rep2	WT	hyb	CellCycle	15	160	YPD	WT.CellCycle.160	CellCycle_rep2	NaN		Offir_20170815	GGCTAGA	58
WT_16_hyb_CellCycle_rep2	WT	hyb	CellCycle	16	165	YPD	WT.CellCycle.165	CellCycle_rep2	NaN		Offir_20170815	TTGCCAG	59
WT_17_hyb_CellCycle_rep2	WT	hyb	CellCycle	17	170	YPD	WT.CellCycle.170	CellCycle_rep2	NaN		Offir_20170815	CGTTGAA	60
WT_18_hyb_CellCycle_rep2	WT	hyb	CellCycle	18	175	YPD	WT.CellCycle.175	CellCycle_rep2	NaN		Offir_20170815	TCGAAGG	61
WT_19_hyb_CellCycle_rep2	WT	hyb	CellCycle	19	180	YPD	WT.CellCycle.180	CellCycle_rep2	NaN		Offir_20170815	TATAGGC	62
WT_20_hyb_CellCycle_rep2	WT	hyb	CellCycle	20	185	YPD	WT.CellCycle.185	CellCycle_rep2	NaN		Offir_20170815	AACAGCT	63
WT_21_hyb_CellCycle_rep2	WT	hyb	CellCycle	21	190	YPD	WT.CellCycle.190	CellCycle_rep2	NaN		Offir_20170815	TCACAAG	64
WT_22_hyb_CellCycle_rep2	WT	hyb	CellCycle	22	195	YPD	WT.CellCycle.195	CellCycle_rep2	NaN		Offir_20170815	TGGAGCA	65
WT_23_hyb_CellCycle_rep2	WT	hyb	CellCycle	23	200	YPD	WT.CellCycle.200	CellCycle_rep2	NaN		Offir_20170815	CAATCGA	66
WT_24_hyb_CellCycle_rep2	WT	hyb	CellCycle	24	205	YPD	WT.CellCycle.205	CellCycle_rep2	NaN		Offir_20170815	TTGCAGA	67
WT_25_hyb_CellCycle_rep2	WT	hyb	CellCycle	25	210	YPD	WT.CellCycle.210	CellCycle_rep2	NaN		Offir_20170815	ACCGATC	68
WT_26_hyb_CellCycle_rep2	WT	hyb	CellCycle	26	215	YPD	WT.CellCycle.215	CellCycle_rep2	NaN		Offir_20170815	CTGATGG	69
WT_27_hyb_CellCycle_rep2	WT	hyb	CellCycle	27	220	YPD	WT.CellCycle.220	CellCycle_rep2	NaN		Offir_20170815	GCTTAGA	70
WT_28_hyb_CellCycle_rep2	WT	hyb	CellCycle	28	225	YPD	WT.CellCycle.225	CellCycle_rep2	NaN		Offir_20170815	TACGAGG	71
WT_29_hyb_CellCycle_rep2	WT	hyb	CellCycle	29	230	YPD	WT.CellCycle.230	CellCycle_rep2	NaN		Offir_20170815	AACGGTG	72
WT_30_hyb_CellCycle_rep2	WT	hyb	CellCycle	30	235	YPD	WT.CellCycle.235	CellCycle_rep2	NaN		Offir_20170815	AGTCTCC	73
WT_31_hyb_CellCycle_rep2	WT	hyb	CellCycle	31	240	YPD	WT.CellCycle.240	CellCycle_rep2	NaN		Offir_20170815	GACACTG	74
WT_32_hyb_CellCycle_rep2	WT	hyb	CellCycle	32	245	YPD	WT.CellCycle.245	CellCycle_rep2	NaN		Offir_20170815	ATCAGGC	75
WT_33_hyb_CellCycle_rep2	WT	hyb	CellCycle	33	250	YPD	WT.CellCycle.250	CellCycle_rep2	NaN		Offir_20170815	CGGATTA	76
WT_34_hyb_CellCycle_rep2	WT	hyb	CellCycle	34	255	YPD	WT.CellCycle.255	CellCycle_rep2	NaN		Offir_20170815	TCTCGAA	77
WT_35_hyb_CellCycle_rep2	WT	hyb	CellCycle	35	260	YPD	WT.CellCycle.260	CellCycle_rep2	NaN		Offir_20170815	ACGCTAT	78
WT_36_hyb_CellCycle_rep2	WT	hyb	CellCycle	36	265	YPD	WT.CellCycle.265	CellCycle_rep2	NaN		Offir_20170815	TCGATAC	79
WT_37_hyb_CellCycle_rep2	WT	hyb	CellCycle	37	270	YPD	WT.CellCycle.270	CellCycle_rep2	NaN		Offir_20170815	TGACGGA	80
WT_38_hyb_CellCycle_rep2	WT	hyb	CellCycle	38	275	YPD	WT.CellCycle.275	CellCycle_rep2	NaN		Offir_20170815	GCTTCAT	81
WT_39_cer_CellCycle_rep2	WT	cer	CellCycle	39	280	YPD	WT.CellCycle.280	CellCycle_rep2	NaN		Offir_20170815	GGCACTT	82
WT_40_hyb_CellCycle_rep2	WT	hyb	CellCycle	40	285	YPD	WT.CellCycle.285	CellCycle_rep2	NaN		Offir_20170815	CGAGTCT	83
WT_41_hyb_CellCycle_rep2	WT	hyb	CellCycle	41	290	YPD	WT.CellCycle.290	CellCycle_rep2	NaN		Offir_20170815	CAGTCAA	84
WT_42_hyb_CellCycle_rep2	WT	hyb	CellCycle	42	295	YPD	WT.CellCycle.295	CellCycle_rep2	NaN		Offir_20170815	TGCCTAA	85
WT_43_hyb_CellCycle_rep2	WT	hyb	CellCycle	43	300	YPD	WT.CellCycle.300	CellCycle_rep2	NaN		Offir_20170815	CCTGACT	86
WT_01_par_CellCycle_rep2	WT	par	CellCycle	01	0	YPD	WT.CellCycle.0	CellCycle_rep2	NaN		Offir_20161114_lib2	AGGCTAG	44
WT_02_par_CellCycle_rep2	WT	par	CellCycle	02	5	HU	WT.CellCycle.5	CellCycle_rep2	NaN		Offir_20161114_lib2	CTACGTA	45
WT_03_par_CellCycle_rep2	WT	par	CellCycle	03	10	HU	WT.CellCycle.10	CellCycle_rep2	NaN		Offir_20161114_lib2	ATAGCGA	46
WT_04_par_CellCycle_rep2	WT	par	CellCycle	04	20	HU	WT.CellCycle.20	CellCycle_rep2	NaN		Offir_20161114_lib2	GTAGTCT	47
WT_05_par_CellCycle_rep2	WT	par	CellCycle	05	30	HU	WT.CellCycle.30	CellCycle_rep2	NaN		Offir_20161114_lib2	CTACAAG	48
WT_06_par_CellCycle_rep2	WT	par	CellCycle	06	60	HU	WT.CellCycle.60	CellCycle_rep2	NaN		Offir_20161114_lib2	CATGAAC	49
WT_07_par_CellCycle_rep2	WT	par	CellCycle	07	120	HU	WT.CellCycle.120	CellCycle_rep2	NaN		Offir_20161114_lib2	TACTAGC	50
WT_08_par_CellCycle_rep2	WT	par	CellCycle	08	125	YPD	WT.CellCycle.125	CellCycle_rep2	NaN		Offir_20161114_lib2	GCAACTA	51
WT_09_par_CellCycle_rep2	WT	par	CellCycle	09	130	YPD	WT.CellCycle.130	CellCycle_rep2	NaN		Offir_20161114_lib2	AGGCGTT	52
WT_10_par_CellCycle_rep2	WT	par	CellCycle	10	135	YPD	WT.CellCycle.135	CellCycle_rep2	NaN		Offir_20161114_lib2	CGCTACA	53
WT_11_par_CellCycle_rep2	WT	par	CellCycle	11	140	YPD	WT.CellCycle.140	CellCycle_rep2	NaN		Offir_20161114_lib2	AAGGTAC	54
WT_12_par_CellCycle_rep2	WT	par	CellCycle	12	145	YPD	WT.CellCycle.145	CellCycle_rep2	NaN		Offir_20161114_lib2	AAGCCTT	55
WT_13_par_CellCycle_rep2	WT	par	CellCycle	13	150	YPD	WT.CellCycle.150	CellCycle_rep2	NaN		Offir_20161114_lib2	CTACAGC	56
WT_14_par_CellCycle_rep2	WT	par	CellCycle	14	155	YPD	WT.CellCycle.155	CellCycle_rep2	NaN		Offir_20161114_lib2	CTTAGTG	57
WT_15_par_CellCycle_rep2	WT	par	CellCycle	15	160	YPD	WT.CellCycle.160	CellCycle_rep2	NaN		Offir_20161114_lib2	GGCTAGA	58
WT_16_par_CellCycle_rep2	WT	par	CellCycle	16	165	YPD	WT.CellCycle.165	CellCycle_rep2	NaN		Offir_20161114_lib2	TTGCCAG	59
WT_17_par_CellCycle_rep2	WT	par	CellCycle	17	170	YPD	WT.CellCycle.170	CellCycle_rep2	NaN		Offir_20161114_lib2	CGTTGAA	60
WT_18_par_CellCycle_rep2	WT	par	CellCycle	18	175	YPD	WT.CellCycle.175	CellCycle_rep2	NaN		Offir_20161114_lib2	TCGAAGG	61
WT_19_par_CellCycle_rep2	WT	par	CellCycle	19	180	YPD	WT.CellCycle.180	CellCycle_rep2	NaN		Offir_20161114_lib2	TATAGGC	62
WT_20_par_CellCycle_rep2	WT	par	CellCycle	20	185	YPD	WT.CellCycle.185	CellCycle_rep2	NaN		Offir_20161114_lib2	AACAGCT	63
WT_21_par_CellCycle_rep2	WT	par	CellCycle	21	190	YPD	WT.CellCycle.190	CellCycle_rep2	NaN		Offir_20161114_lib2	TCACAAG	64
WT_22_par_CellCycle_rep2	WT	par	CellCycle	22	195	YPD	WT.CellCycle.195	CellCycle_rep2	NaN		Offir_20161114_lib2	TGGAGCA	65
WT_23_par_CellCycle_rep2	WT	par	CellCycle	23	200	YPD	WT.CellCycle.200	CellCycle_rep2	NaN		Offir_20161114_lib2	CAATCGA	66
WT_24_par_CellCycle_rep2	WT	par	CellCycle	24	205	YPD	WT.CellCycle.205	CellCycle_rep2	NaN		Offir_20161114_lib2	TTGCAGA	67
WT_25_par_CellCycle_rep2	WT	par	CellCycle	25	210	YPD	WT.CellCycle.210	CellCycle_rep2	NaN		Offir_20161114_lib2	ACCGATC	68
WT_26_par_CellCycle_rep2	WT	par	CellCycle	26	215	YPD	WT.CellCycle.215	CellCycle_rep2	NaN		Offir_20161114_lib2	CTGATGG	69
WT_27_par_CellCycle_rep2	WT	par	CellCycle	27	220	YPD	WT.CellCycle.220	CellCycle_rep2	NaN		Offir_20161114_lib2	GCTTAGA	70
WT_28_par_CellCycle_rep2	WT	par	CellCycle	28	225	YPD	WT.CellCycle.225	CellCycle_rep2	NaN		Offir_20161114_lib2	TACGAGG	71
WT_29_par_CellCycle_rep2	WT	par	CellCycle	29	230	YPD	WT.CellCycle.230	CellCycle_rep2	NaN		Offir_20161114_lib2	AACGGTG	72
WT_30_par_CellCycle_rep2	WT	par	CellCycle	30	235	YPD	WT.CellCycle.235	CellCycle_rep2	NaN		Offir_20161114_lib2	AGTCTCC	73
WT_31_par_CellCycle_rep2	WT	par	CellCycle	31	240	YPD	WT.CellCycle.240	CellCycle_rep2	NaN		Offir_20161114_lib2	GACACTG	74
WT_32_par_CellCycle_rep2	WT	par	CellCycle	32	245	YPD	WT.CellCycle.245	CellCycle_rep2	NaN		Offir_20161114_lib2	ATCAGGC	75
WT_33_par_CellCycle_rep2	WT	par	CellCycle	33	250	YPD	WT.CellCycle.250	CellCycle_rep2	NaN		Offir_20161114_lib2	CGGATTA	76
WT_34_par_CellCycle_rep2	WT	par	CellCycle	34	255	YPD	WT.CellCycle.255	CellCycle_rep2	NaN		Offir_20161114_lib2	TCTCGAA	77
WT_35_par_CellCycle_rep2	WT	par	CellCycle	35	260	YPD	WT.CellCycle.260	CellCycle_rep2	NaN		Offir_20161114_lib2	ACGCTAT	78
WT_36_par_CellCycle_rep2	WT	par	CellCycle	36	265	YPD	WT.CellCycle.265	CellCycle_rep2	NaN		Offir_20161114_lib2	TCGATAC	79
WT_37_par_CellCycle_rep2	WT	par	CellCycle	37	270	YPD	WT.CellCycle.270	CellCycle_rep2	NaN		Offir_20161114_lib2	TGACGGA	80
WT_38_par_CellCycle_rep2	WT	par	CellCycle	38	275	YPD	WT.CellCycle.275	CellCycle_rep2	NaN		Offir_20161114_lib2	GCTTCAT	81
WT_39_par_CellCycle_rep2	WT	par	CellCycle	39	280	YPD	WT.CellCycle.280	CellCycle_rep2	NaN		Offir_20161114_lib2	GGCACTT	82
WT_40_par_CellCycle_rep2	WT	par	CellCycle	40	285	YPD	WT.CellCycle.285	CellCycle_rep2	NaN		Offir_20161114_lib2	CGAGTCT	83
WT_41_par_CellCycle_rep2	WT	par	CellCycle	41	290	YPD	WT.CellCycle.290	CellCycle_rep2	NaN		Offir_20161114_lib2	CAGTCAA	84
WT_42_par_CellCycle_rep2	WT	par	CellCycle	42	295	YPD	WT.CellCycle.295	CellCycle_rep2	NaN		Offir_20161114_lib2	TGCCTAA	85
WT_43_par_CellCycle_rep2	WT	par	CellCycle	43	300	YPD	WT.CellCycle.300	CellCycle_rep2	NaN		Offir_20161114_lib2	CCTGACT	86

## Sheet: description
Table S3	a table with detailed description for every sample (summerizedexperiment in DESeq)
