# Supplementary material for: Independent evolution of transcript abundance and gene regulatory dynamics
Source: HighWire-hosted journal article supplement (doi:10.1101/gr.261537.120), 2020-07-01
Supplement: Supplemental_Table_S5.xlsx [file Supplemental_Table_S5.xlsx]

## Sheet: description
Table S5	list of genes that are not covered by RNAseq reads in either one of the species, or the mapping is biased

## Sheet: no_mapping_cer
YBL027W
YBR012C
YBR013C
YCR018C
YCR031C
YDR040C
YDR447C
YFR012W
YGL076C
YGR001C
YHR055C
YHR056C
YJL107C
YJR030C
YKL044W
YLR256W
YLR316C
YLR360W
YLR367W
YMR134W
YNL245C
YNR076W
YOL121C
YOL161C
YOR182C
YPL109C
YPR043W
YMR135W-A
YER056C-A
YIL009C-A
YNL138W-A
YCL005W-A
YER076W-A

## Sheet: no_mapping_par
YAL065C
YAR020C
YAR029W
YAR031W
YAR068W
YBR090C
YBR298C
YBR302C
YCL068C
YCR007C
YCR039C
YCR040W
YCR099C
YCR100C
YCR101C
YCR104W
YDL039C
YDL136W
YDL185W
YDL243C
YDR145W
YDR540C
YDR542W
YEL035C
YEL049W
YER039C
YER066W
YER135C
YER186C
YER187W
YFL020C
YFL057C
YFR026C
YFR057W
YGL051W
YGL053W
YGL259W
YGL262W
YGL263W
YGR023W
YGR050C
YHL028W
YHL042W
YHL043W
YHL046C
YHL047C
YHL048W
YHR054C
YHR211W
YHR213W
YIL004C
YIL011W
YIL086C
YIL102C
YIL165C
YIL173W
YJL020C
YJL041W
YJL078C
YJL108C
YJL222W
YJR108W
YJR115W
YJR151C
YJR155W
YJR159W
YKL021C
YKL219W
YKR013W
YKR104W
YLL059C
YLL063C
YLL064C
YLR031W
YLR079W
YLR161W
YLR162W
YLR390W
YML003W
YML132W
YMR084W
YMR321C
YMR322C
YMR323W
YMR325W
YNL176C
YNL246W
YNL283C
YNR065C
YNR068C
YNR077C
YOL028C
YOL029C
YOL159C
YOL162W
YOL163W
YOL164W
YOL165C
YOR010C
YOR293W
YPL165C
YPL257W
YPL277C
YPL278C
YPR005C
YPR071W
YAL064C-A
YLR390W-A
YAL064W-B
YCL001W-A
YJL205C
YKL096C-B
YLR162W-A
YMR122W-A
YOL159C-A
YCL001W-B
YER188C-A
YFL041W-A
YGL258W-A
YIL156W-B

## Sheet: mapping_higher_par
YBR189W
YCL069W
YDL037C
YDL246C
YEL021W
YEL069C
YFL051C
YGL107C
YIL164C
YIL169C
YIR019C
YLR411W
YMR147W
YNR066C
YNR075W
YOL152W

## Sheet: mapping_higher_cer
YBL097W
YBR297W
YDR111C
YDR448W
YDR449C
YEL070W
YLR337C
YLR445W
YLR460C
YNL018C
YNL034W
YNR072W
YPL274W
YPR199C
YPR200C
YPR201W
YCL073C
