# Supplementary material for: Independent evolution of transcript abundance and gene regulatory dynamics
Source: HighWire-hosted journal article supplement (doi:10.1101/gr.261537.120), 2020-07-01
Supplement: Supplemental_Table_S6.xlsx [file Supplemental_Table_S6.xlsx]

## Sheet: description
Talbe S6	results of differential expression anaylsis via DESeq for the six experiments

## Sheet: YPD_to_Low_N.0
ORF	GeneName	baseMean	log2FoldChange_sp	lfcSE_sp	pvalue_sp	padj_sp	log2FoldChange_cis	lfcSE_cis	pvalue_cis	padj_cis	log2FoldChange_trans	lfcSE_trans	pvalue_trans	padj_trans
YAL001C	TFC3	17.6145	0.550446	0.0967468	7.38097e-09	1.42478e-08	-0.00635641	0.104454	0.949559	0.957154	0.495551	0.140194	8.84841e-05	0.000288391
YAL002W	VPS8	10.4646	0.62778	0.111025	7.59646e-09	1.46477e-08	0.427257	0.123047	0.000258674	0.000452615	0.153177	0.15143	0.257698	0.349385
YAL003W	EFB1	1969.23	-0.286532	0.0269955	2.21155e-26	8.17441e-26	0.101302	0.0282797	0.000325867	0.000563849	-0.38425	0.0389843	3.28919e-23	6.30786e-22
YAL004W	YAL004W
YAL005C	SSA1	531.024	1.27753	0.0559317	1.17854e-116	2.62101e-115	0.221435	0.0583553	0.000119104	0.000215307	1.03638	0.082351	8.72945e-39	4.23899e-37
YAL007C	ERP2	125.704	-0.389962	0.0441869	8.419e-19	2.4364e-18	-0.25778	0.0479788	5.82677e-08	1.39363e-07	-0.126023	0.0642409	0.0456682	0.081033
YAL008W	FUN14	25.6162	-0.56991	0.0966801	2.08763e-09	4.15011e-09	-0.576282	0.107312	2.61257e-08	6.43177e-08	0.0153003	0.13371	0.900785	0.933659
YAL009W	SPO7	18.5546	-0.0796814	0.0796886	0.311409	0.345191	0.00742902	0.089616	0.931979	0.943069	-0.0788866	0.115111	0.465681	0.563909
YAL010C	MDM10	15.8353	-0.335487	0.0987315	0.000547739	0.000794731	-0.774226	0.112472	9.29955e-13	3.06301e-12	0.390662	0.141764	0.00229244	0.00564106
YAL011W	SWC3	14.0677	-0.549032	0.106671	1.53212e-07	2.77438e-07	-0.580265	0.118808	3.37093e-07	7.63145e-07	0.0377234	0.145665	0.773787	0.833128
YAL012W	CYS3	726.034	-0.222068	0.0399369	2.43303e-08	4.56668e-08	-0.0758361	0.0418249	0.0678854	0.0877489	-0.142053	0.057235	0.011786	0.0244735
YAL013W	DEP1	43.656	0.714486	0.0636727	1.26906e-29	5.14328e-29	0.309159	0.0696657	6.12013e-06	1.23924e-05	0.376917	0.0923612	2.01544e-05	7.29668e-05
YAL014C	SYN8	27.8399	-0.293749	0.0815115	0.000265451	0.000397351	-0.191563	0.0886269	0.0258705	0.0357628	-0.0869401	0.114843	0.420524	0.518672
YAL015C	NTG1	17.1121	0.684503	0.0990155	2.01047e-12	4.52248e-12	1.03294	0.113537	5.52155e-21	2.83194e-20	-0.305208	0.140242	0.0167074	0.0333707
YAL016W	TPD3	112.045	-0.157906	0.0404026	8.78129e-05	0.000136143	-0.245468	0.0447023	3.07646e-08	7.53177e-08	0.0867444	0.0594682	0.138085	0.207933
YAL017W	PSK1	23.7356	0.850467	0.0830116	3.29118e-25	1.16993e-24	0.0905325	0.0899593	0.29969	0.345226	0.705386	0.124278	5.90398e-10	3.95066e-09
YAL018C	LDS1	2.20882	-1.69598	0.465502	3.74272e-06	6.28896e-06	-1.76525	0.518759	4.28997e-06	8.83878e-06	0.0325922	0.332336	0.851605	0.894354
YAL019W	FUN30	61.4721	-0.602771	0.0567553	1.25361e-26	4.67938e-26	-0.629452	0.0625413	2.26939e-24	1.36966e-23	0.0288358	0.0820531	0.716669	0.78847
YAL020C	ATS1	43.9829	0.631369	0.0669642	2.03476e-21	6.3879e-21	0.436966	0.0740844	1.84944e-09	4.95651e-09	0.175177	0.0963771	0.0574615	0.0983329
YAL021C	CCR4	44.721	-0.688766	0.0636257	1.10697e-27	4.25814e-27	-0.436643	0.0691889	1.40141e-10	3.99014e-10	-0.231607	0.0912229	0.00822423	0.0177136
YAL022C	FUN26	40.8832	1.31273	0.0766182	4.84697e-67	4.26163e-66	0.526238	0.0835444	1.18457e-10	3.38732e-10	0.730713	0.114005	6.3953e-12	5.19177e-11
YAL023C	PMT2	217.615	0.436102	0.0391531	5.89886e-29	2.34934e-28	0.117786	0.0418638	0.00460245	0.00700223	0.310014	0.0568657	3.05452e-08	1.71995e-07
YAL024C	LTE1	25.6593	-0.448304	0.0855532	1.12318e-07	2.04787e-07	-0.504059	0.0941274	3.56738e-08	8.6655e-08	0.0570877	0.119847	0.609002	0.696962
YAL025C	MAK16	216.097	-0.324539	0.0378957	9.0679e-18	2.53815e-17	-0.159403	0.0406889	7.9919e-05	0.000146523	-0.160236	0.055049	0.00317834	0.00755749
YAL026C	DRS2	55.7621	0.655464	0.059443	1.31113e-28	5.17895e-28	-0.116332	0.0646089	0.0672039	0.0869708	0.749104	0.0887926	1.04182e-18	1.4249e-17
YAL027W	SAW1	16.5926	-0.992641	0.0982573	8.98554e-25	3.1393e-24	-0.638405	0.111029	2.39557e-09	6.37815e-09	-0.291319	0.138534	0.020727	0.0404379
YAL028W	FRT2	2.74597	1.74495	0.266719	7.94938e-13	1.8199e-12	1.20024	0.293452	1.39644e-06	2.99245e-06	0.231892	0.277397	0.218664	0.304576
YAL029C	MYO4	119.393	0.558732	0.0454486	5.66121e-35	2.62159e-34	0.35456	0.0495591	5.15036e-13	1.71668e-12	0.194993	0.066176	0.00258675	0.00628635
YAL030W	SNC1	94.5619	0.625478	0.0518342	7.86052e-34	3.5379e-33	0.536117	0.057011	2.06212e-21	1.08497e-20	0.0821445	0.0752688	0.262368	0.354716
YAL031C	GIP4	15.1383	0.463464	0.0996927	2.26494e-06	3.84858e-06	0.153153	0.108531	0.140578	0.172641	0.261664	0.139515	0.038369	0.0694552
YAL032C	PRP45	34.6192	-0.544285	0.064307	1.53454e-17	4.26816e-17	-0.805359	0.0733922	7.30479e-29	5.37004e-28	0.247723	0.0943383	0.00605001	0.0134832
YAL033W	POP5	46.3276	-0.986251	0.0588499	8.39438e-64	7.04143e-63	-0.584498	0.0664458	4.71288e-19	2.1901e-18	-0.374596	0.0868583	7.51341e-06	2.9263e-05
YAL034C	FUN19	13.982	1.37808	0.119525	4.29385e-32	1.84775e-31	1.14191	0.131754	1.87211e-19	8.8395e-19	0.177958	0.158358	0.202864	0.286565
YAL035W	FUN12	273.374	0.897641	0.0352784	1.86746e-143	6.10154e-142	0.83463	0.0381223	3.80535e-107	2.42671e-105	0.0603844	0.0513268	0.233873	0.322367
YAL036C	RBG1	128.181	0.5819	0.0402403	1.18359e-47	7.31006e-47	0.64322	0.0443131	2.65774e-48	4.22446e-47	-0.0614257	0.0589825	0.290529	0.386569
YAL037W	YAL037W	4.29716	0.0814354	0.190742	0.650088	0.678815	0.738079	0.22375	0.000164129	0.000292603	-0.47989	0.265448	0.0123437	0.025466
YAL038W	CDC19	4115.19	0.392666	0.0369298	1.61436e-26	5.99635e-26	0.0919955	0.0383918	0.0159342	0.0226234	0.294019	0.0528976	1.74345e-08	1.00305e-07
YAL039C	CYC3	68.5937	-0.956742	0.0695855	9.73355e-44	5.63057e-43	0.553431	0.0744431	3.85899e-14	1.37454e-13	-1.51335	0.102714	3.49919e-50	2.68423e-48
YAL040C	CLN3	66.1156	-1.17148	0.0660947	2.53013e-71	2.43048e-70	-0.250167	0.0699558	0.000265533	0.000464003	-0.887275	0.0981065	1.86226e-21	3.12918e-20
YAL041W	CDC24	42.8654	-0.605595	0.0620242	8.36923e-23	2.74633e-22	-0.788544	0.0702425	4.63332e-30	3.58541e-29	0.175225	0.0905805	0.0442573	0.0789797
YAL042W	ERV46	291.07	0.641904	0.0367107	8.86496e-69	8.02089e-68	0.227054	0.0394066	6.64668e-09	1.70781e-08	0.405403	0.0535241	1.49892e-14	1.47743e-13
YAL043C	PTA1	98.8265	-0.621805	0.0519696	2.72767e-33	1.20917e-32	-0.912216	0.0573272	4.86098e-58	1.01296e-56	0.27968	0.0757554	0.00014395	0.000453521
YAL044C	GCV3	214.241	1.6156	0.0619454	1.27663e-151	4.8613e-150	-0.255079	0.0648833	6.37168e-05	0.000118127	1.87054	0.0900119	2.44645e-96	9.24934e-94
YAL045C	YAL045C
YAL046C	BOL3	36.753	0.229203	0.069212	0.000831573	0.00118928	0.57689	0.0770121	2.32674e-14	8.42367e-14	-0.328219	0.100458	0.000594231	0.00165977
YAL047C	SPC72	13.2433	0.223759	0.100929	0.0238767	0.0302271	-0.256479	0.112993	0.0173436	0.0245323	0.429463	0.146008	0.00102454	0.00272233
YAL048C	GEM1
YAL049C	AIM2	134.225	-1.28774	0.0539508	4.08277e-127	1.03398e-125	-1.09961	0.0586421	9.33233e-80	3.16641e-78	-0.176135	0.0775768	0.0194313	0.0381915
YAL051W	OAF1	24.1914	0.230826	0.0738165	0.00158015	0.00220563	-0.200546	0.0825668	0.0126063	0.0181219	0.404198	0.108312	7.13028e-05	0.000238111
YAL053W	FLC2	94.582	-0.43078	0.0586006	1.42605e-13	3.37117e-13	-0.643566	0.0635161	1.07938e-24	6.60479e-24	0.204547	0.0841302	0.011953	0.0247524
YAL054C	ACS1	4.93304	3.32163	0.206083	1.54942e-60	1.22222e-59	3.13882	0.241446	6.49472e-41	7.72507e-40	0.0985017	0.23568	0.59646	0.68661
YAL055W	PEX22	14.3128	0.185394	0.100577	0.0603135	0.0731697	0.194952	0.112045	0.0683831	0.088298	-0.0156386	0.14018	0.90249	0.934993
YAL056W	GPB2	18.6297	1.26039	0.0987549	1.80897e-38	9.35963e-38	1.01821	0.110547	2.04353e-21	1.07626e-20	0.196292	0.136454	0.113942	0.177173
YAL058W	CNE1	28.1433	0.0667237	0.0724002	0.351797	0.38664	-0.225682	0.0818062	0.0046215	0.00702718	0.274599	0.105861	0.00613875	0.0136465
YAL059W	ECM1	68.9882	-0.457836	0.0603433	2.27272e-14	5.53844e-14	0.307891	0.0649553	1.44345e-06	3.09069e-06	-0.744999	0.0893678	3.4133e-18	4.53934e-17
YAL060W	BDH1	68.1181	-0.0971247	0.07962	0.216826	0.245857	-1.12645	0.0875799	3.31447e-39	3.69337e-38	0.996884	0.12223	1.32555e-18	1.79441e-17
YAL061W	BDH2	6.78318	0.210215	0.181888	0.221527	0.25108	0.761982	0.206684	3.56572e-05	6.74772e-05	-0.404093	0.241107	0.0258417	0.0492724
YAL062W	GDH3	7.6037	-1.14735	0.159955	7.15664e-14	1.71171e-13	-1.11443	0.186366	9.9743e-11	2.87236e-10	-0.00394812	0.199549	0.980708	0.993281
YAL063C	FLO9	21.2797	-6.30279	0.224313	3.31126e-175	1.68524e-173	-5.3101	0.255389	6.29166e-97	3.14167e-95	-0.614831	0.318125	0.0051729	0.011731
YAL064W	YAL064W
YAL065C	YAL065C
YAL066W	YAL066W
YAL067C	SEO1	9.18206	-0.85211	0.181112	6.43248e-07	1.12367e-06	-1.24937	0.207428	5.12336e-11	1.50739e-10	0.270325	0.224567	0.122399	0.187948
YAL068C	PAU8
YAL069W	YAL069W
YAR002W	NUP60	49.9901	-0.153143	0.0583894	0.00825808	0.0108623	0.100573	0.0640252	0.11046	0.137958	-0.242451	0.0849632	0.00314263	0.00749276
YAR003W	SWD1	2.9105	1.30136	0.198562	3.19142e-12	7.10352e-12	1.41058	0.239866	8.10771e-11	2.35404e-10	-0.0837451	0.232595	0.656375	0.737934
YAR007C	RFA1	85.8492	-0.502297	0.0508559	3.38422e-23	1.12165e-22	-0.513423	0.0555751	1.0473e-20	5.28442e-20	0.0134914	0.0736603	0.850827	0.893714
YAR008W	SEN34	25.0607	-0.162043	0.076407	0.0319223	0.0398689	-0.0320753	0.0839763	0.695062	0.733754	-0.117577	0.109398	0.255013	0.346542
YAR009C	YAR009C
YAR010C	YAR010C
YAR014C	BUD14	38.5991	1.15073	0.0653472	2.07253e-70	1.95194e-69	0.935593	0.072851	8.09814e-39	8.83783e-38	0.194659	0.0941788	0.0311461	0.0580071
YAR015W	ADE1	257.812	0.477909	0.0662423	3.6316e-13	8.44183e-13	-0.527958	0.0697418	1.4815e-14	5.46072e-14	0.990245	0.0985413	4.0952e-26	9.31462e-25
YAR018C	KIN3	25.0908	-0.12932	0.0819833	0.109992	0.129663	-0.202113	0.0904773	0.0211334	0.0295454	0.0705952	0.116326	0.517545	0.61352
YAR019C	CDC15	11.5546	0.585722	0.108627	3.72844e-08	6.94637e-08	0.255457	0.120904	0.0258711	0.0357628	0.266194	0.151531	0.0491378	0.0861213
YAR020C	PAU7
YAR023C	YAR023C	1.0205	0.0252097	0.291112	0.920779	0.931871	0.340363	0.318477	0.157879	0.192237	-0.182538	0.314518	0.298767	0.395739
YAR027W	UIP3	23.443	0.780668	0.0806604	1.21644e-22	3.95249e-22	0.822609	0.0905685	1.40049e-20	7.02635e-20	-0.0441408	0.114231	0.68145	0.758711
YAR028W	YAR028W	26.246	-1.71087	0.0840538	6.63789e-94	1.00384e-92	-2.26383	0.0984093	1.18534e-119	9.50607e-118	0.494301	0.124822	1.73461e-05	6.35015e-05
YAR029W	YAR029W
YAR030C	YAR030C
YAR031W	PRM9
YAR033W	MST28	18.0903	-1.50682	0.0946964	1.58031e-58	1.20527e-57	-1.53833	0.108991	5.62655e-47	8.41281e-46	0.0318076	0.132339	0.793841	0.848693
YAR035W	YAT1	6.95895	1.0756	0.146349	2.47951e-14	6.02851e-14	0.0821066	0.15854	0.573541	0.620555	0.836935	0.235384	5.9706e-06	2.35839e-05
YAR042W	SWH1	39.0606	0.333061	0.0695447	1.36865e-06	2.3467e-06	0.149029	0.07603	0.0449677	0.0600893	0.166953	0.0997733	0.0787865	0.129871
YAR047C	YAR047C
YAR050W	FLO1	20.4857	-4.28408	0.219904	7.58556e-86	9.62839e-85	1.90569	0.237492	7.41071e-18	3.23638e-17	-6.2405	0.319624	7.43065e-76	1.51271e-73
YAR053W	YAR053W
YAR060C	YAR060C
YAR061W	YAR061W
YAR062W	YAR062W
YAR064W	YAR064W
YAR066W	YAR066W
YAR068W	YAR068W
YAR069C	YAR069C
YAR070C	YAR070C
YAR071W	PHO11
YAR073W	IMD1
YAR075W	YAR075W
YBL001C	ECM15	159.924	0.0688258	0.0475738	0.14606	0.169501	-0.0774153	0.0512664	0.12709	0.156877	0.142047	0.0689471	0.0351073	0.0646115
YBL002W	HTB2	897.813	0.462345	0.0329907	8.83728e-45	5.20308e-44	0.324577	0.034745	6.20498e-21	3.17017e-20	0.134308	0.0475029	0.00426533	0.00986299
YBL003C	HTA2	877.373	0.409766	0.0344181	8.33258e-33	3.63597e-32	0.47618	0.0362141	8.04224e-40	9.19386e-39	-0.0662321	0.0494721	0.175802	0.254937
YBL004W	UTP20	114.806	0.174103	0.0476787	0.000243556	0.000365819	0.238766	0.0514678	2.72942e-06	5.7102e-06	-0.0642712	0.0689195	0.340821	0.439141
YBL005W	PDR3	12.6418	-1.50134	0.173444	1.45124e-19	4.30092e-19	-2.40372	0.190398	3.09612e-39	3.45733e-38	0.655964	0.247604	0.000479661	0.00136791
YBL006C	LDB7	71.6151	0.635711	0.0568322	2.32265e-29	9.31346e-29	0.517099	0.0624743	5.20708e-17	2.19087e-16	0.108463	0.0821639	0.172891	0.251473
YBL007C	SLA1	150.964	0.96551	0.0417218	3.25476e-119	7.52291e-118	0.370896	0.0453048	1.58885e-16	6.53442e-16	0.57914	0.061388	5.34905e-22	9.375e-21
YBL008W	HIR1	15.4969	0.328761	0.0943429	0.000400967	0.000592331	0.347742	0.104747	0.000552477	0.000931888	-0.0253206	0.131531	0.833865	0.881319
YBL009W	ALK2	30.8122	0.0587191	0.0679271	0.383016	0.418	0.342724	0.0756423	3.67045e-06	7.59487e-06	-0.269081	0.0986656	0.00419836	0.00971663
YBL010C	LAA2	14.6534	-0.599122	0.0920665	3.99601e-11	8.55271e-11	-0.387742	0.105588	0.000134146	0.000241099	-0.173437	0.131264	0.151589	0.22513
YBL011W	SCT1	50.3678	-0.433258	0.0521188	6.76265e-17	1.84034e-16	-0.851562	0.0592794	1.013e-47	1.577e-46	0.403435	0.0776535	8.20751e-08	4.31832e-07
YBL012C	YBL012C
YBL013W	FMT1
YBL014C	RRN6	35.6823	0.0016641	0.0654252	0.979538	0.982322	-0.0738951	0.0726963	0.2997	0.345226	0.0720955	0.0950819	0.428136	0.526516
YBL015W	ACH1	22.7189	-0.175682	0.0866859	0.0397674	0.0492141	-0.346358	0.0970241	0.000220257	0.000388478	0.159062	0.12306	0.16388	0.240668
YBL016W	FUS3	1.33203	-0.00889711	0.29462	0.972241	0.976299	-0.148243	0.3105	0.528529	0.577043	0.0812829	0.307157	0.631712	0.716906
YBL017C	PEP1	104.695	1.83698	0.0504859	7.60507e-292	1.25793e-289	1.26801	0.0552815	6.15636e-118	4.72255e-116	0.545166	0.0741241	3.48445e-14	3.34722e-13
YBL018C	POP8	67.2274	-0.465593	0.0520216	2.4455e-19	7.21519e-19	-0.292091	0.0579929	3.31257e-07	7.50896e-07	-0.162685	0.0762685	0.0284031	0.0535773
YBL019W	APN2	10.3064	-0.779856	0.131851	1.06989e-09	2.15402e-09	-0.350188	0.14332	0.00877472	0.0128834	-0.323562	0.177773	0.0332296	0.061541
YBL020W	RFT1	22.126	-0.60517	0.0831581	1.76167e-13	4.14056e-13	-0.70002	0.0925072	8.234e-15	3.06919e-14	0.0916448	0.117204	0.404145	0.502499
YBL021C	HAP3	25.2799	0.166397	0.0794416	0.0339528	0.0423251	0.320255	0.0898685	0.000239589	0.000420892	-0.145376	0.114311	0.176109	0.255242
YBL022C	PIM1	119.266	-0.00417074	0.0476565	0.929939	0.939524	0.158218	0.0516216	0.0019446	0.00309376	-0.158249	0.0692084	0.019251	0.0378652
YBL023C	MCM2	30.3191	0.777978	0.0754182	1.97716e-25	7.09019e-25	0.534266	0.0838257	7.12894e-11	2.07898e-10	0.214819	0.10789	0.0352805	0.0648852
YBL024W	NCL1	139.76	0.0189592	0.0422418	0.652364	0.681057	0.161648	0.0456244	0.000352073	0.000605826	-0.139938	0.0614292	0.0204206	0.039899
YBL025W	RRN10	1.76886	-0.860401	0.247816	0.000122163	0.000187478	0.114586	0.252034	0.582347	0.628412	-0.654164	0.372627	0.00453713	0.0104413
YBL026W	LSM2	141.053	-0.405906	0.0419494	2.87679e-22	9.2228e-22	-0.303843	0.04592	2.50709e-11	7.50568e-11	-0.0971793	0.0613048	0.106901	0.167951
YBL027W	RPL19B
YBL028C	YBL028C	99.7834	-0.31567	0.0543377	5.23806e-09	1.02118e-08	0.0632446	0.0581957	0.270882	0.31484	-0.364127	0.0786791	1.89563e-06	8.12436e-06
YBL029W	YBL029W	12.1208	-0.190168	0.125217	0.118273	0.138868	-0.319685	0.137126	0.0128112	0.0183817	0.116025	0.167146	0.425715	0.523903
YBL030C	PET9	444.651	-1.45014	0.0690043	1.75581e-99	2.94098e-98	-0.465751	0.0716588	3.78229e-11	1.12218e-10	-0.947437	0.101616	8.42581e-23	1.57589e-21
YBL031W	SHE1	31.9139	-0.980293	0.102276	1.60828e-22	5.19695e-22	0.0314048	0.106406	0.758646	0.793266	-0.955133	0.157025	7.82595e-12	6.29525e-11
YBL032W	HEK2	138.72	0.349383	0.04418	2.11429e-15	5.38543e-15	-0.184021	0.0478803	0.000104405	0.000189577	0.521955	0.0649111	1.79074e-16	2.07404e-15
YBL033C	RIB1	38.1831	-0.341489	0.0670437	2.84912e-07	5.093e-07	-0.212658	0.0745868	0.0035559	0.00548569	-0.115399	0.0969769	0.213879	0.298854
YBL034C	STU1	22.1072	0.935102	0.0863053	4.7549e-28	1.84785e-27	0.704393	0.0963718	5.69579e-14	2.0112e-13	0.194733	0.121698	0.0852157	0.139212
YBL035C	POL12	29.4611	0.374041	0.0708709	1.01999e-07	1.8623e-07	-0.0460651	0.0774933	0.543257	0.591294	0.392293	0.103184	6.07952e-05	0.000205354
YBL036C	YBL036C	90.1278	-0.186775	0.0444263	2.42852e-05	3.89875e-05	-0.34955	0.0491971	7.44364e-13	2.46708e-12	0.159574	0.0652477	0.0125422	0.0258512
YBL037W	APL3	33.9253	0.644442	0.0674435	5.83714e-22	1.85673e-21	0.599824	0.0757936	7.86769e-16	3.10774e-15	0.0356173	0.0974097	0.701866	0.775893
YBL038W	MRPL16	54.222	-0.598517	0.0593555	3.45286e-24	1.18215e-23	0.336019	0.0655344	1.86716e-07	4.31756e-07	-0.91827	0.0900642	1.95344e-26	4.49547e-25
YBL039C	URA7	174.97	-0.257375	0.0398823	9.63792e-11	2.02194e-10	0.0965395	0.042959	0.0235808	0.032768	-0.346506	0.0581979	1.46558e-09	9.3914e-09
YBL040C	ERD2	114.991	-0.138706	0.0404794	0.000584327	0.00084504	0.0323117	0.0449472	0.468748	0.517431	-0.166813	0.0598656	0.00459918	0.0105566
YBL041W	PRE7	162.517	-0.61591	0.0421358	1.11162e-48	6.95486e-48	-0.420249	0.0459589	3.19347e-20	1.57384e-19	-0.187855	0.0614745	0.00188242	0.00472659
YBL042C	FUI1	64.0284	1.02325	0.0575631	1.64655e-71	1.58746e-70	0.186979	0.0628308	0.00249487	0.00393016	0.808573	0.0862597	1.4675e-22	2.68771e-21
YBL043W	ECM13	8.45688	0.0333483	0.0951588	0.721585	0.746685	1.6865	0.13198	2.96949e-39	3.32295e-38	-1.63848	0.164039	2.56401e-25	5.53931e-24
YBL044W	YBL044W
YBL045C	COR1	184.943	-0.504402	0.0672389	4.03446e-14	9.71538e-14	0.372917	0.0708394	8.2307e-08	1.95974e-07	-0.855332	0.09944	1.15601e-19	1.71394e-18
YBL046W	PSY4	26.8094	0.613975	0.0732205	2.57343e-17	7.10916e-17	0.697364	0.0821512	4.57849e-18	2.02287e-17	-0.0820104	0.104921	0.409465	0.508552
YBL047C	EDE1	144.338	-0.0665071	0.0427123	0.118025	0.138638	-0.548872	0.0465797	1.80025e-32	1.53689e-31	0.472274	0.0627809	1.49753e-14	1.47743e-13
YBL048W	RRT1
YBL049W	MOH1	0.814655	0.0731056	0.347414	0.797576	0.818292	1.41109	0.484727	5.55869e-05	0.000103453	-0.72358	0.574891	0.00130351	0.00338043
YBL050W	SEC17	66.8742	0.323623	0.0444551	2.77996e-13	6.48495e-13	0.302384	0.0506691	1.64641e-09	4.42584e-09	0.0181193	0.0662586	0.779948	0.837886
YBL051C	PIN4	53.1315	1.9347	0.0709067	5.1879e-166	2.34697e-164	1.71606	0.0782	1.3455e-108	8.79224e-107	0.196665	0.100861	0.0405812	0.0731595
YBL052C	SAS3	35.753	1.08451	0.0700753	6.20012e-55	4.39321e-54	0.58974	0.0776153	9.78373e-15	3.63661e-14	0.453085	0.102162	2.8105e-06	1.17876e-05
YBL053W	YBL053W
YBL054W	TOD6	94.9227	-0.137687	0.050915	0.00654557	0.00868966	-0.196302	0.055153	0.000313259	0.000542743	0.0582101	0.0736081	0.416963	0.51529
YBL055C	YBL055C	25.1578	0.190786	0.0776698	0.0129413	0.0167888	1.131	0.0895352	6.24911e-38	6.58896e-37	-0.902204	0.121424	9.50158e-16	1.04124e-14
YBL056W	PTC3	66.0712	0.343304	0.0550441	3.62537e-10	7.46077e-10	0.467766	0.0608101	6.80206e-15	2.5462e-14	-0.121625	0.079993	0.116865	0.180708
YBL057C	PTH2	72.3929	0.193978	0.0480821	5.04862e-05	7.93418e-05	0.23363	0.0535156	9.98348e-06	1.97764e-05	-0.0403556	0.0706086	0.559126	0.651432
YBL058W	SHP1	112.593	-0.0797	0.0456529	0.0795151	0.0951987	-0.0961368	0.0504422	0.0542061	0.0714383	0.0168751	0.0670487	0.797093	0.851294
YBL059W	IAI11	22.9533	-0.399652	0.0827385	1.02458e-06	1.76418e-06	0.0411743	0.0913838	0.642297	0.685297	-0.401651	0.120514	0.000338371	0.00100168
YBL060W	YEL1	16.7239	0.110871	0.0946415	0.23348	0.263611	0.0909949	0.10457	0.365277	0.411802	0.013755	0.132966	0.910342	0.940734
YBL061C	SKT5	51.4984	0.240578	0.052828	4.6879e-06	7.83241e-06	0.289116	0.0596102	8.68226e-07	1.89662e-06	-0.0493256	0.0778047	0.514046	0.610465
YBL062W	YBL062W
YBL063W	KIP1	11.1665	-0.172577	0.122891	0.149008	0.172809	0.15735	0.133378	0.209199	0.248662	-0.277474	0.168373	0.0575947	0.098529
YBL064C	PRX1	37.0561	-0.18824	0.0791734	0.0160969	0.020705	-0.0391552	0.0868868	0.64315	0.686014	-0.133862	0.113012	0.208278	0.292573
YBL065W	YBL065W
YBL066C	SEF1	10.6164	-0.118878	0.134554	0.361726	0.396647	-0.212195	0.144571	0.114525	0.142732	0.0833936	0.17655	0.580423	0.671808
YBL067C	UBP13	36.3798	-0.455783	0.0723273	2.04619e-10	4.24559e-10	-0.377573	0.0786617	9.15824e-07	1.99484e-06	-0.0664985	0.102454	0.495638	0.592059
YBL068W	PRS4	97.3366	-0.0602767	0.0410767	0.140841	0.16366	0.147824	0.0455541	0.00106487	0.00174555	-0.203792	0.0606769	0.000629778	0.00174799
YBL069W	AST1	33.398	-0.453897	0.0647104	1.61516e-12	3.64197e-12	-0.429505	0.0727651	1.83447e-09	4.91888e-09	-0.0177078	0.0939308	0.844159	0.889001
YBL070C	YBL070C
YBL071C	YBL071C
YBL072C	RPS8A	2035.14	-0.652145	0.0325636	1.50517e-89	2.08012e-88	-0.455791	0.0341029	4.74481e-41	5.68197e-40	-0.191942	0.0467663	3.38308e-05	0.000118055
YBL073W	YBL073W
YBL074C	AAR2	0.431675	0.741316	0.562041	0.0413344	0.0509745	0.30803	0.47296	0.251039	0.294361	0.0832663	0.39341	1	1
YBL075C	SSA3	14.3251	1.60245	0.104659	1.41853e-54	1.00111e-53	0.779818	0.118609	7.58541e-12	2.35205e-11	0.710737	0.158188	2.80185e-07	1.36057e-06
YBL076C	ILS1	550.484	1.06835	0.0273471	0	0	0.581869	0.0292812	2.45245e-88	1.01413e-86	0.480185	0.0399378	7.21137e-34	2.70708e-32
YBL077W	YBL077W
YBL078C	ATG8	6.31206	-0.113607	0.154749	0.4443	0.479641	0.583029	0.183468	0.000448514	0.000763584	-0.56838	0.231858	0.00158559	0.00403488
YBL079W	NUP170	82.81	0.0694518	0.0462522	0.131464	0.153437	-0.283529	0.051173	2.14781e-08	5.31479e-08	0.344056	0.0681712	2.29651e-07	1.12864e-06
YBL080C	PET112	11.0503	-0.210195	0.125633	0.0852332	0.101819	-0.433183	0.138202	0.000842731	0.00139262	0.192121	0.168421	0.188875	0.270339
YBL081W	YBL081W	46.5257	0.605356	0.0609948	1.69173e-23	5.67806e-23	0.500237	0.0668023	3.00378e-14	1.07936e-13	0.0945069	0.0876607	0.264162	0.356687
YBL082C	ALG3	46.5981	0.21855	0.0517045	2.14544e-05	3.46214e-05	-0.0238032	0.057801	0.67662	0.716413	0.232436	0.0763685	0.0017587	0.0044391
YBL083C	YBL083C
YBL084C	CDC27	18.2066	0.0850142	0.0938598	0.357133	0.392083	-0.145213	0.102771	0.141709	0.173908	0.207308	0.132169	0.0875239	0.142062
YBL085W	BOI1	49.0945	0.431261	0.0579374	7.10719e-14	1.70065e-13	0.207388	0.064346	0.00104678	0.00171642	0.208645	0.0845952	0.0105503	0.0220984
YBL086C	YBL086C	24.0488	0.260895	0.0811688	0.00114032	0.00160782	-0.104106	0.0895124	0.23075	0.272078	0.334927	0.117274	0.00218416	0.00540136
YBL087C	RPL23A
YBL088C	TEL1	16.273	1.09271	0.09758	4.98825e-30	2.04198e-29	0.570697	0.107317	3.54965e-08	8.62641e-08	0.444485	0.138841	0.000401795	0.00116531
YBL089W	AVT5	16.5349	0.331621	0.0878883	0.000131073	0.000200801	0.355507	0.100819	0.000254239	0.000445149	-0.0298314	0.125572	0.797668	0.851673
YBL090W	MRP21	36.7941	-1.15515	0.0757001	1.39168e-53	9.65421e-53	-0.151269	0.081396	0.056549	0.0742308	-0.964231	0.115065	3.2441e-19	4.59119e-18
YBL091C	MAP2	150.136	1.16748	0.0385884	4.27275e-202	3.14106e-200	0.607543	0.0424701	6.35367e-47	9.47323e-46	0.54599	0.057121	2.48514e-22	4.50474e-21
YBL092W	RPL32	5398.63	-0.487088	0.0319365	1.06624e-52	7.23538e-52	-0.270421	0.0332953	3.36545e-16	1.35669e-15	-0.2123	0.0458021	2.871e-06	1.20318e-05
YBL093C	ROX3	60.267	-0.170829	0.0516546	0.000882616	0.00125718	-0.378048	0.0581512	4.6272e-11	1.36597e-10	0.201166	0.0761867	0.00668463	0.0147424
YBL094C	YBL094C
YBL095W	MRX3	32.0984	-0.209029	0.066566	0.00153762	0.00214909	-0.334901	0.0747297	4.71311e-06	9.66919e-06	0.121659	0.0965874	0.187349	0.268373
YBL096C	YBL096C
YBL097W	BRN1	6.05059	0.293716	0.135689	0.0253823	0.0320488	3.51663	0.215564	2.1841e-61	5.07036e-60	-3.15317	0.261006	1.47124e-37	6.71319e-36
YBL098W	BNA4	40.9721	-1.22459	0.11507	1.45429e-27	5.57795e-27	-0.859275	0.122358	2.46782e-13	8.37319e-13	-0.289438	0.153497	0.0338519	0.0625622
YBL099W	ATP1	383.556	-0.279941	0.0688057	4.06708e-05	6.44523e-05	0.281029	0.0718543	6.56613e-05	0.000121434	-0.5352	0.0985648	1.1047e-08	6.52586e-08
YBL100C	YBL100C
YBL101C	ECM21	22.7319	-0.0495143	0.0902955	0.577685	0.609808	-0.300278	0.099046	0.00166158	0.00266911	0.229344	0.12724	0.0504159	0.0880697
YBL102W	SFT2	61.9311	0.510663	0.0575625	4.5803e-19	1.34016e-18	0.192494	0.0628087	0.00184396	0.00294156	0.299282	0.0835738	0.000210131	0.000641792
YBL103C	RTG3	9.37965	-0.0197402	0.134682	0.87978	0.893624	-0.489314	0.149099	0.000429006	0.00073273	0.391248	0.18602	0.0121568	0.0251057
YBL104C	SEA4	47.8558	-0.440277	0.0598845	1.39473e-13	3.29863e-13	-0.674133	0.0672945	3.08091e-24	1.84263e-23	0.224201	0.0875322	0.00776807	0.0168648
YBL105C	PKC1	30.8644	0.256375	0.0695026	0.000197687	0.000298362	0.0308955	0.0761754	0.678557	0.717924	0.208165	0.100254	0.0289778	0.0545835
YBL106C	SRO77	10.0401	0.745175	0.128727	2.52137e-09	4.989e-09	0.251602	0.140763	0.0553984	0.0728506	0.382438	0.177898	0.0115858	0.0240862
YBL107C	MIX23	59.968	-0.988589	0.0597323	2.71373e-62	2.20641e-61	-0.252828	0.0651133	7.82067e-05	0.000143582	-0.704162	0.0887362	1.25206e-16	1.46619e-15
YBL108W	YBL108W
YBL109W	YBL109W
YBL111C	YBL111C
YBL112C	YBL112C
YBL113C	YBL113C
YBR001C	NTH2	15.8436	2.41438	0.125343	3.55181e-85	4.40274e-84	1.79704	0.141418	5.8462e-39	6.40662e-38	0.481904	0.175651	0.00129544	0.00336281
YBR002C	RER2	40.831	-0.275745	0.062556	9.01744e-06	1.48412e-05	0.0878813	0.0689932	0.194538	0.232804	-0.344849	0.0915249	8.70245e-05	0.000284158
YBR003W	COQ1	45.121	-0.031474	0.0678582	0.639779	0.669239	0.354413	0.0744264	1.16756e-06	2.51932e-06	-0.365922	0.098393	9.28067e-05	0.000301736
YBR004C	GPI18	31.1827	0.494482	0.0734295	1.07295e-11	2.3448e-11	0.628514	0.0815937	3.77791e-15	1.43447e-14	-0.128298	0.104922	0.197793	0.2806
YBR005W	RCR1	18.9767	-0.883874	0.0970241	1.9583e-20	5.9468e-20	-0.108496	0.105653	0.284844	0.329475	-0.699704	0.146139	8.35734e-08	4.39279e-07
YBR006W	UGA2	24.1249	-0.686804	0.0857407	4.84588e-16	1.27672e-15	-0.923921	0.0976892	2.79619e-22	1.53689e-21	0.216073	0.122223	0.0571053	0.0980085
YBR007C	DSF2	18.4774	0.328191	0.0928694	0.000333683	0.00049598	0.358895	0.103261	0.000304738	0.000528672	-0.0354582	0.129801	0.767115	0.827796
YBR008C	FLR1	48.9587	-2.3383	0.101218	1.55907e-120	3.70051e-119	-0.719952	0.110269	1.30925e-11	3.99186e-11	-1.56319	0.151057	1.68366e-26	3.90859e-25
YBR009C	HHF1	756.721	0.030974	0.0377804	0.410909	0.446234	0.302392	0.0398223	2.13392e-14	7.75213e-14	-0.26687	0.0544034	6.54071e-07	2.99481e-06
YBR010W	HHT1	774.263	-0.450129	0.0338358	1.56693e-40	8.53269e-40	-0.0546867	0.0355275	0.121878	0.150936	-0.388719	0.0488556	8.37125e-16	9.21185e-15
YBR011C	IPP1	945.85	0.18115	0.0343466	1.24102e-07	2.25729e-07	-0.0810207	0.0360378	0.023828	0.0330941	0.258076	0.0494591	1.29351e-07	6.64711e-07
YBR012C	YBR012C
YBR013C	YBR013C
YBR014C	GRX7	51.6727	-0.499637	0.0547875	4.88782e-20	1.46829e-19	-0.357352	0.0621697	5.47985e-09	1.41695e-08	-0.131284	0.0808105	0.0940797	0.150579
YBR015C	MNN2	102.26	0.20475	0.0430021	1.75968e-06	3.0084e-06	-0.226748	0.0470565	1.15437e-06	2.49188e-06	0.422177	0.0632609	8.81753e-12	7.01822e-11
YBR016W	YBR016W	148.382	-0.0331775	0.0434598	0.443441	0.478811	-0.267526	0.0472926	1.13625e-08	2.89004e-08	0.229216	0.063417	0.000233173	0.000706863
YBR017C	KAP104	75.4917	-0.15892	0.0474033	0.000755908	0.0010837	0.00243032	0.0528503	0.962929	0.96805	-0.155522	0.0699857	0.0228091	0.0440775
YBR018C	GAL7	1.71782	-1.51303	0.275266	1.04305e-09	2.10078e-09	-1.02735	0.328766	9.7897e-05	0.000178249	-0.166743	0.284351	0.482274	0.579101
YBR019C	GAL10	7.67991	-4.52063	0.194125	3.65253e-121	8.78765e-120	-4.51242	0.247357	3.70994e-75	1.14167e-73	0.00051806	0.23491	0.940382	0.963873
YBR020W	GAL1	4.99778	-0.740012	0.180715	1.48237e-05	2.41273e-05	-1.37317	0.209726	1.30171e-12	4.23203e-12	0.436191	0.2404	0.0157241	0.0316456
YBR021W	FUR4	30.008	0.17569	0.0743967	0.0169648	0.0217949	-0.439688	0.0816711	3.63333e-08	8.8176e-08	0.583629	0.109672	1.27164e-08	7.46205e-08
YBR022W	POA1	31.495	0.0651884	0.0766267	0.389535	0.424503	0.192357	0.0831895	0.0175147	0.024761	-0.1203	0.108649	0.241239	0.331484
YBR023C	CHS3	80.8679	0.177759	0.0513455	0.000499726	0.000729266	0.257137	0.0562099	3.58768e-06	7.43524e-06	-0.078441	0.0745536	0.279912	0.374797
YBR024W	SCO2	17.0325	-0.556639	0.104703	6.0367e-08	1.11254e-07	-0.00571347	0.111624	0.957351	0.963724	-0.480957	0.149873	0.000330993	0.000982582
YBR025C	OLA1	602.178	-0.299305	0.025793	3.3514e-31	1.40785e-30	-0.285087	0.0276054	3.77627e-25	2.35705e-24	-0.0134125	0.0375727	0.719456	0.79055
YBR026C	ETR1	40.6475	1.40411	0.0671682	2.09501e-98	3.43309e-97	1.18175	0.0758683	4.07324e-56	8.10514e-55	0.200419	0.0971888	0.0306405	0.0572669
YBR027C	YBR027C
YBR028C	YPK3	19.2932	0.527715	0.0957966	2.19228e-08	4.12798e-08	0.355193	0.10495	0.000429983	0.000733924	0.140443	0.132778	0.248185	0.338917
YBR029C	CDS1	85.9382	-0.247783	0.0441141	1.72461e-08	3.26595e-08	0.0332148	0.0483288	0.488007	0.53701	-0.27291	0.0647644	1.67448e-05	6.15915e-05
YBR030W	RKM3	39.9924	0.256077	0.0582655	9.73822e-06	1.59828e-05	0.394583	0.0656648	1.04102e-09	2.83881e-09	-0.134659	0.0853685	0.103039	0.162801
YBR031W	RPL4A
YBR032W	YBR032W
YBR033W	EDS1	4.52474	-0.700716	0.216699	0.000464777	0.000681647	0.0206852	0.213899	0.911306	0.925291	-0.478969	0.28538	0.0157682	0.031698
YBR034C	HMT1	159.577	-0.902415	0.0389704	2.83286e-119	6.57646e-118	-0.499526	0.0421733	1.00522e-32	8.67966e-32	-0.391583	0.0569291	2.93411e-12	2.45731e-11
YBR035C	PDX3	91.3897	0.529759	0.0516794	7.18267e-25	2.52108e-24	-0.134446	0.0564091	0.0157757	0.0224103	0.646852	0.0767169	2.87192e-18	3.82899e-17
YBR036C	CSG2	67.781	-0.0692352	0.047983	0.147093	0.170662	0.0660498	0.0527814	0.205871	0.245147	-0.131199	0.0702855	0.0558519	0.0962153
YBR037C	SCO1	39.7029	-1.17023	0.0697625	3.49421e-64	2.94974e-63	-0.0884173	0.0761357	0.23516	0.27697	-1.05349	0.106941	2.37781e-25	5.15809e-24
YBR038W	CHS2	54.8512	0.104076	0.0566045	0.0641771	0.0776966	0.524981	0.0629553	3.02009e-17	1.28293e-16	-0.405032	0.0833228	4.57066e-07	2.16005e-06
YBR039W	ATP3	176.403	-0.643435	0.064351	7.32811e-24	2.48639e-23	-0.172623	0.0674852	0.0091855	0.0134566	-0.442317	0.091939	5.04624e-07	2.36369e-06
YBR040W	FIG1	1.24907	-2.25959	0.454863	2.56814e-09	5.07966e-09	-1.20203	0.470517	0.000301002	0.000522534	-0.259113	0.369184	0.400791	0.498797
YBR041W	FAT1	45.2997	0.084503	0.0577449	0.14063	0.16345	-0.187124	0.0645051	0.00317607	0.0049299	0.260708	0.0848413	0.0014317	0.00368043
YBR042C	CST26	31.5082	0.414173	0.0794196	1.3562e-07	2.46256e-07	0.331356	0.0866348	8.36988e-05	0.00015324	0.0686207	0.111867	0.51508	0.611419
YBR043C	QDR3	31.2731	-0.0915488	0.0865268	0.283142	0.315576	-0.394118	0.0949503	1.82834e-05	3.54613e-05	0.278024	0.122633	0.0143539	0.0291428
YBR044C	TCM62	24.2836	0.326617	0.0791742	3.03621e-05	4.85813e-05	0.805793	0.0894668	3.00858e-20	1.48549e-19	-0.443976	0.115867	3.97936e-05	0.000137485
YBR045C	GIP1	12.5943	-1.04268	0.168842	9.09547e-11	1.91117e-10	-1.32539	0.186996	3.44425e-14	1.23262e-13	0.198748	0.20689	0.22994	0.318228
YBR046C	ZTA1	7.56666	1.40917	0.15416	2.5208e-21	7.89034e-21	0.716341	0.169362	4.49343e-06	9.23281e-06	0.494861	0.21084	0.00335276	0.00792063
YBR047W	FMP23	7.90541	0.24727	0.147353	0.0813483	0.0973715	-0.180698	0.157796	0.212935	0.252762	0.3405	0.198113	0.0364869	0.0667099
YBR048W	RPS11B
YBR049C	REB1	24.6568	0.0471077	0.078364	0.54302	0.576589	0.0059825	0.0852806	0.942568	0.950831	0.0372402	0.111372	0.722938	0.793552
YBR050C	REG2	1.22988	0.999269	0.312444	0.00020063	0.000302717	-0.0831871	0.290889	0.714084	0.752168	0.64187	0.44543	0.00570246	0.012833
YBR051W	YBR051W
YBR052C	RFS1	50.5121	1.81992	0.0686882	1.23446e-156	4.91277e-155	1.77947	0.0786368	2.71932e-115	1.99908e-113	0.0341676	0.0994792	0.718457	0.789616
YBR053C	YBR053C	27.5129	0.551783	0.0915858	9.80707e-10	1.98201e-09	0.128998	0.100327	0.181992	0.219028	0.370014	0.131182	0.0020774	0.00515986
YBR054W	YRO2	5.19596	0.0718206	0.294201	0.778556	0.801108	-0.376884	0.306285	0.111182	0.138793	0.25379	0.322309	0.175797	0.254937
YBR055C	PRP6	25.009	1.19236	0.0781012	1.09713e-53	7.62091e-53	1.17235	0.0894123	1.1118e-40	1.30773e-39	0.0126653	0.111718	0.904111	0.93594
YBR056W	YBR056W	19.135	0.735606	0.0867371	8.29261e-18	2.32606e-17	0.130115	0.0970418	0.164907	0.200104	0.544504	0.129008	3.88134e-06	1.59503e-05
YBR057C	MUM2	22.9671	-0.720269	0.0698951	2.60061e-25	9.27562e-25	-0.24869	0.0804473	0.00151925	0.00244791	-0.432082	0.10439	1.20984e-05	4.54161e-05
YBR058C	UBP14	63.983	0.839516	0.0539579	3.8214e-55	2.71864e-54	0.572688	0.0600762	5.34659e-22	2.90848e-21	0.250021	0.0789343	0.00108813	0.00287685
YBR059C	AKL1	64.8015	0.587791	0.0482473	2.08234e-34	9.48521e-34	0.209229	0.0542495	9.46428e-05	0.000172561	0.362446	0.0717181	2.12306e-07	1.05317e-06
YBR060C	ORC2	32.5045	0.226315	0.0620161	0.000236467	0.000355372	0.330959	0.0696019	1.27395e-06	2.73883e-06	-0.102252	0.0903372	0.238167	0.327604
YBR061C	TRM7	78.5953	-0.67179	0.0469273	7.77633e-47	4.75839e-46	-0.199718	0.0519559	0.000101411	0.00018433	-0.455009	0.0694646	1.87852e-11	1.45578e-10
YBR062C	YBR062C	31.0092	0.343609	0.0695922	6.39593e-07	1.11765e-06	0.677467	0.0810553	1.51066e-17	6.48492e-17	-0.314459	0.103234	0.00133091	0.00344812
YBR063C	YBR063C	16.4604	0.432297	0.0952327	4.02823e-06	6.75155e-06	0.109105	0.104085	0.275479	0.31962	0.277997	0.134596	0.0239616	0.0459525
YBR064W	YBR064W
YBR065C	ECM2	2.95159	-0.438222	0.226184	0.0347809	0.0433063	-0.658104	0.259613	0.00245227	0.00386765	0.155947	0.259115	0.388722	0.487072
YBR066C	NRG2	16.2178	0.713006	0.1017	9.30356e-13	2.12258e-12	1.65173	0.120986	2.90087e-44	3.94713e-43	-0.854123	0.162633	2.0883e-09	1.31745e-08
YBR067C	TIP1	113.665	1.8373	0.114501	6.44643e-60	5.03259e-59	0.0167548	0.114808	0.87853	0.899084	1.79511	0.165861	2.16547e-28	5.75972e-27
YBR068C	BAP2	189.889	0.939824	0.0456144	5.09841e-95	7.8906e-94	0.28818	0.0490482	2.97626e-09	7.84921e-09	0.633445	0.0669116	2.85764e-22	5.14935e-21
YBR069C	TAT1	106.364	0.2994	0.05093	3.5114e-09	6.89129e-09	-0.400281	0.0557038	3.69158e-13	1.23982e-12	0.684335	0.0756355	8.68546e-21	1.38055e-19
YBR070C	ALG14	31.6004	0.00505052	0.0759803	0.946417	0.952898	-0.170882	0.0840952	0.0367444	0.0497031	0.164896	0.109146	0.109394	0.171258
YBR071W	YBR071W	24.3369	-0.874739	0.0916474	3.34238e-22	1.0696e-21	-0.27834	0.100691	0.00408363	0.0062434	-0.526557	0.133449	1.49034e-05	5.52406e-05
YBR072W	HSP26	10.0174	-0.608692	0.166062	0.000121661	0.000186761	-0.303844	0.177881	0.0582049	0.0762004	-0.19474	0.208616	0.2422	0.332632
YBR073W	RDH54	23.0514	-0.522113	0.0864104	9.35167e-10	1.89286e-09	-1.19444	0.0985167	2.90667e-35	2.77708e-34	0.615721	0.129256	1.77655e-07	8.92687e-07
YBR074W	PFF1	33.265	0.854955	0.0690436	8.47075e-36	4.03925e-35	0.354161	0.0765411	2.25833e-06	4.75282e-06	0.461833	0.1011	1.38502e-06	6.05862e-06
YBR076W	ECM8	1.04486	-0.756181	0.368137	0.0113523	0.014789	-0.738464	0.407083	0.00981743	0.0143308	0.0350351	0.321581	0.845979	0.890566
YBR077C	SLM4	25.9255	0.287683	0.0755685	0.000119948	0.000184238	0.376971	0.0861279	6.93965e-06	1.39664e-05	-0.0876932	0.109309	0.396566	0.494942
YBR078W	ECM33	495.466	0.599097	0.0355329	4.67398e-64	3.93939e-63	0.555698	0.0375695	6.2221e-50	1.05219e-48	0.0412341	0.0511502	0.414417	0.513102
YBR079C	RPG1	233.416	1.00334	0.0373651	1.29394e-159	5.30917e-158	0.751453	0.0400791	3.50288e-79	1.17346e-77	0.244354	0.0541712	4.87511e-06	1.95235e-05
YBR080C	SEC18	55.6138	0.429886	0.0526807	2.43364e-16	6.49585e-16	0.133429	0.0589993	0.0218351	0.0304943	0.281331	0.0778467	0.000194617	0.000598226
YBR081C	SPT7	27.5169	1.05613	0.0774385	3.22182e-43	1.84757e-42	0.240002	0.0843857	0.00345159	0.00533722	0.764207	0.11624	1.35049e-12	1.16609e-11
YBR082C	UBC4	727.149	0.1112	0.0245281	5.63302e-06	9.37891e-06	0.275337	0.0262413	6.79326e-26	4.37963e-25	-0.163076	0.0357569	4.45338e-06	1.80751e-05
YBR083W	TEC1	25.8738	-1.4561	0.100021	1.85805e-49	1.17359e-48	-0.541022	0.111415	4.42325e-07	9.92886e-07	-0.819744	0.153628	1.70311e-09	1.0874e-08
YBR084W	MIS1	218.318	0.322321	0.0338667	1.48226e-21	4.66722e-21	0.410167	0.0368579	4.97225e-29	3.67059e-28	-0.087375	0.0495727	0.0748237	0.12419
YBR085W	AAC3	8.31769	-0.502593	0.150811	0.000531354	0.000772441	-0.356337	0.164561	0.0179	0.0252922	-0.088732	0.192385	0.578976	0.670558
YBR086C	IST2	111.572	0.731081	0.0425922	1.85252e-66	1.61273e-65	0.183815	0.0462889	6.15966e-05	0.000114277	0.532594	0.0626826	3.75362e-18	4.95459e-17
YBR087W	RFC5	48.974	-0.206897	0.0556644	0.000184148	0.000278405	0.100781	0.0612774	0.0951161	0.120184	-0.295073	0.0814524	0.000181951	0.000562867
YBR088C	POL30	197.544	-0.475722	0.0396237	2.24035e-33	9.94815e-33	-0.245112	0.0426378	6.9351e-09	1.78019e-08	-0.22332	0.057567	8.08938e-05	0.000266773
YBR089W	YBR089W
YBR090C	YBR090C
YBR091C	TIM12	63.2729	-1.49189	0.0587367	8.17229e-144	2.7035e-142	-0.184111	0.064492	0.00369374	0.00569003	-1.29266	0.0887478	8.39692e-50	6.1729e-48
YBR092C	PHO3	126.896	1.03233	0.0640963	3.41493e-59	2.6234e-58	0.980729	0.0685746	1.55305e-47	2.38962e-46	0.0450105	0.0903332	0.604657	0.693789
YBR093C	PHO5	32.4502	4.02953	0.194953	2.31013e-96	3.66093e-95	-0.501866	0.199712	0.0046192	0.0070257	4.58677	0.285619	7.65039e-56	6.86331e-54
YBR094W	PBY1	37.0832	0.36636	0.0665229	2.87358e-08	5.37452e-08	0.257282	0.0734878	0.000347714	0.000599496	0.0969936	0.0957818	0.289585	0.385545
YBR095C	RXT2	23.4872	0.0266937	0.0806372	0.737522	0.762145	-0.0977752	0.0893334	0.259495	0.303069	0.115336	0.115436	0.285953	0.381631
YBR096W	YBR096W	86.4728	1.06773	0.0488905	1.29117e-106	2.42346e-105	0.849605	0.0547512	3.15201e-55	6.08891e-54	0.205857	0.0718331	0.00329879	0.00780881
YBR097W	VPS15	15.6992	-0.102573	0.101398	0.302511	0.335961	-0.0545229	0.109605	0.603663	0.648506	-0.0389263	0.139995	0.759878	0.822502
YBR098W	MMS4	13.2831	-0.734714	0.116165	9.33839e-11	1.96066e-10	-0.611547	0.129748	7.05322e-07	1.55336e-06	-0.085464	0.15642	0.536948	0.63143
YBR099C	YBR099C
YBR101C	FES1	92.2263	-0.110339	0.0468337	0.0179306	0.0229576	0.235792	0.0515547	3.7611e-06	7.77638e-06	-0.337099	0.0688239	5.1745e-07	2.41522e-06
YBR102C	EXO84	25.1658	0.197158	0.0697969	0.00434581	0.00585899	-0.203296	0.0788979	0.00826965	0.0121824	0.377336	0.102999	0.00010682	0.000344966
YBR103W	SIF2	31.5196	-0.327727	0.0696139	2.05776e-06	3.50442e-06	-0.732817	0.0783172	1.56447e-21	8.29731e-21	0.381389	0.101829	7.70486e-05	0.000254727
YBR104W	YMC2	55.4792	0.213068	0.0538977	7.00965e-05	0.000109252	0.216466	0.0604771	0.000279915	0.000487686	-0.00600763	0.0791436	0.937661	0.96127
YBR105C	VID24	34.9168	-0.261409	0.0930042	0.00429784	0.00579726	0.435154	0.100758	7.80662e-06	1.56635e-05	-0.647833	0.137155	1.7813e-07	8.93689e-07
YBR106W	SND3	537.594	-0.645374	0.0324733	3.25086e-88	4.36721e-87	-0.31759	0.0345238	2.39625e-20	1.18981e-19	-0.321375	0.0470842	5.50467e-12	4.50328e-11
YBR107C	IML3	6.26457	-0.660755	0.159313	1.4702e-05	2.39439e-05	-0.418678	0.174788	0.0082851	0.0122017	-0.150212	0.20128	0.359047	0.457937
YBR108W	AIM3	39.34	-0.188765	0.0709143	0.0071791	0.00950212	-0.484628	0.0788742	3.57355e-10	9.96041e-10	0.278917	0.102521	0.00421164	0.0097431
YBR109C	CMD1	554.867	-0.48019	0.0239479	1.32192e-89	1.83165e-88	-0.310997	0.0259814	3.44082e-33	3.03033e-32	-0.166946	0.0351737	1.81842e-06	7.83147e-06
YBR110W	ALG1	32.4004	0.137354	0.0626389	0.0270689	0.0341052	-0.0636137	0.0704994	0.357842	0.404109	0.189994	0.0920627	0.0312457	0.0581518
YBR111C	YSA1	106.486	0.371666	0.0428124	3.0886e-18	8.77979e-18	0.0169632	0.0478386	0.720549	0.758073	0.344445	0.063693	3.45037e-08	1.9224e-07
YBR112C	CYC8	81.5413	0.199175	0.0486034	3.82831e-05	6.07775e-05	-0.115092	0.0527568	0.0273876	0.0377606	0.304672	0.0708571	1.01812e-05	3.87971e-05
YBR113W	YBR113W
YBR114W	RAD16	19.4788	0.791534	0.0919966	2.42968e-18	6.92904e-18	1.03139	0.102087	3.23978e-25	2.03177e-24	-0.214148	0.128227	0.0703749	0.117617
YBR115C	LYS2	57.5449	2.15817	0.0878627	1.50794e-135	4.4097e-134	2.13898	0.0925324	1.34886e-120	1.13325e-118	0.0154502	0.118884	0.889574	0.925415
YBR116C	YBR116C
YBR117C	TKL2	2.22589	0.343472	0.229308	0.101975	0.12075	-0.494306	0.269199	0.0247802	0.0343445	0.600666	0.348566	0.00500303	0.0113946
YBR118W	TEF2	4280.5	0.0399399	0.0458313	0.381441	0.416711	-0.0652477	0.0475767	0.16648	0.201827	0.102539	0.0652004	0.108594	0.170207
YBR119W	MUD1	25.5076	-0.698955	0.0784697	2.14799e-19	6.35157e-19	-0.639519	0.0886461	1.47364e-13	5.08141e-13	-0.0459036	0.112066	0.663143	0.743061
YBR120C	CBP6	48.1116	-1.34841	0.0721681	3.425e-79	3.81653e-78	-0.321841	0.0772128	2.008e-05	3.88462e-05	-0.988069	0.108648	4.48169e-22	7.93364e-21
YBR121C	GRS1	463.609	0.564101	0.0219257	3.27536e-146	1.11848e-144	0.257988	0.0239959	4.39658e-27	2.97204e-26	0.303214	0.0324036	5.14598e-21	8.32956e-20
YBR122C	MRPL36	141.869	-0.818973	0.0456585	1.78227e-72	1.75671e-71	-0.298005	0.0493602	1.08291e-09	2.94697e-09	-0.503936	0.0667974	1.16245e-14	1.15438e-13
YBR123C	TFC1	25.3621	-0.235068	0.0794117	0.00274046	0.00375687	-0.415259	0.0889817	1.60933e-06	3.42922e-06	0.169543	0.113642	0.11183	0.174452
YBR124W	YBR124W
YBR125C	PTC4	38.0743	-1.25804	0.0633531	6.60742e-89	8.96746e-88	-0.897967	0.0709325	9.7805e-38	1.01906e-36	-0.331205	0.0922825	0.000180004	0.000557169
YBR126C	TPS1	65.4407	0.508382	0.0631205	5.09195e-16	1.34021e-15	0.114622	0.0686551	0.0890409	0.11302	0.368946	0.0916887	2.64107e-05	9.4136e-05
YBR127C	VMA2	247.846	0.483342	0.0438718	2.11247e-28	8.28245e-28	0.119591	0.0464746	0.00943753	0.0138068	0.352456	0.0633505	1.37411e-08	7.99246e-08
YBR128C	ATG14	4.98512	-0.735784	0.142882	9.46878e-08	1.7318e-07	-0.835535	0.172734	1.60233e-07	3.72961e-07	0.0944012	0.189323	0.550328	0.643306
YBR129C	OPY1	17.7187	-1.14464	0.0982156	2.19412e-32	9.51146e-32	-0.87595	0.109869	1.65467e-16	6.78401e-16	-0.218678	0.136227	0.0788691	0.129938
YBR130C	SHE3	54.5233	0.9996	0.0550593	1.92972e-74	1.99492e-73	0.869107	0.0614444	2.22773e-46	3.29369e-45	0.120003	0.0801558	0.122461	0.187989
YBR131W	CCZ1	13.6571	1.24913	0.116218	4.26714e-28	1.66318e-27	0.941905	0.129457	2.83759e-14	1.02381e-13	0.235388	0.156771	0.0912325	0.146821
YBR132C	AGP2	4.00908	0.818296	0.19448	7.18118e-06	1.1893e-05	1.0064	0.232762	9.60445e-07	2.08602e-06	-0.139138	0.232971	0.432135	0.530078
YBR133C	HSL7	43.5882	-0.220038	0.0609818	0.00027856	0.000415797	-0.094518	0.0675837	0.154614	0.188564	-0.116199	0.0887551	0.174539	0.253513
YBR134W	YBR134W
YBR135W	CKS1	107.752	0.539896	0.0431605	4.00737e-36	1.92828e-35	0.525459	0.0479571	2.5027e-28	1.79739e-27	0.0117125	0.0634508	0.850769	0.893714
YBR136W	MEC1	19.6968	1.17733	0.0819914	8.45585e-48	5.24084e-47	0.306207	0.0929063	0.000662484	0.00110791	0.808753	0.126593	2.63745e-12	2.22293e-11
YBR137W	YBR137W	34.83	-0.23663	0.0757048	0.00157953	0.00220563	-0.11438	0.0829513	0.15694	0.191189	-0.108457	0.108049	0.288665	0.384475
YBR138C	YBR138C	7.52951	0.452507	0.13484	0.000536863	0.000780021	0.267202	0.148471	0.0521677	0.0689619	0.128292	0.178344	0.399066	0.497353
YBR139W	ATG42	36.672	0.366937	0.0733267	4.41045e-07	7.76855e-07	0.211342	0.0817137	0.0079266	0.0117161	0.137523	0.105581	0.168443	0.246084
YBR140C	IRA1	33.9358	2.08083	0.0768711	1.29402e-163	5.5236e-162	1.71899	0.0860325	1.1036e-90	4.90869e-89	0.322147	0.110217	0.00190485	0.00477611
YBR141C	BMT2	22.3072	0.0532827	0.077947	0.489186	0.523612	0.0827516	0.0872457	0.329194	0.374473	-0.0291179	0.112327	0.782986	0.839616
YBR142W	MAK5	121.517	-0.122872	0.0458391	0.00708914	0.00938613	-0.140765	0.0494003	0.00400298	0.00612895	0.0185858	0.0663738	0.775231	0.833834
YBR143C	SUP45	253.27	0.31206	0.0290403	5.23286e-27	1.97698e-26	0.175315	0.0318081	3.10784e-08	7.59805e-08	0.134077	0.042802	0.00156457	0.00398712
YBR144C	YBR144C
YBR145W	ADH5	17.123	-0.965679	0.162335	4.81923e-10	9.87354e-10	-1.34126	0.177831	1.13522e-15	4.43121e-15	0.26826	0.203373	0.104365	0.164535
YBR146W	MRPS9	68.0843	-0.888164	0.0585168	1.16911e-52	7.92331e-52	0.147531	0.0626908	0.0168204	0.0238177	-1.02164	0.087768	1.12855e-33	4.20662e-32
YBR147W	RTC2	3.92693	-0.910138	0.195822	7.03515e-07	1.22733e-06	-0.712143	0.215143	0.000174574	0.000310291	-0.0954808	0.227357	0.584139	0.675231
YBR148W	YSW1	5.61511	-0.48702	0.188896	0.00616268	0.00819575	-0.317088	0.199392	0.0713891	0.0918257	-0.0893031	0.224756	0.603623	0.69285
YBR149W	ARA1	94.5511	0.525171	0.0570416	2.07337e-20	6.29262e-20	0.261274	0.0625365	2.19185e-05	4.22793e-05	0.247108	0.0827823	0.00199493	0.00497371
YBR150C	TBS1	16.8422	-0.137526	0.0974431	0.150769	0.174698	-0.603459	0.111421	1.84423e-08	4.58933e-08	0.418587	0.141553	0.00104027	0.00275999
YBR151W	APD1	101.703	-0.834431	0.043563	2.48191e-82	2.89356e-81	-0.676925	0.0489424	3.98378e-44	5.4067e-43	-0.149607	0.0643971	0.0177644	0.0352557
YBR152W	SPP381	0.752566	0.0149735	0.397216	0.960954	0.965881	0.120207	0.380681	0.634289	0.677557	-0.0513586	0.35289	0.684548	0.761041
YBR153W	RIB7	26.6079	-0.414006	0.081252	2.56717e-07	4.59676e-07	-0.0317149	0.0874842	0.709284	0.747708	-0.346764	0.116187	0.00142125	0.00366068
YBR154C	RPB5	260.627	-0.075058	0.0294957	0.0107856	0.0140819	0.397254	0.0323483	6.46328e-35	6.05489e-34	-0.467663	0.0436395	3.13654e-27	7.69458e-26
YBR155W	CNS1	102.111	-0.134254	0.0406762	0.000924853	0.00131487	0.0463657	0.044805	0.296978	0.342388	-0.176308	0.0598931	0.00276405	0.00667736
YBR156C	SLI15	11.4028	0.35318	0.112625	0.00134774	0.0018907	0.405885	0.125909	0.000669231	0.00111848	-0.0558969	0.153475	0.682731	0.759368
YBR157C	ICS2	0.840494	1.36934	0.38439	1.47967e-05	2.40908e-05	0.326846	0.341431	0.189355	0.227269	0.383521	0.39529	0.0893932	0.144564
YBR158W	AMN1	50.1913	2.0532	0.0799904	1.61049e-147	5.64525e-146	0.689518	0.0864385	3.38313e-16	1.36278e-15	1.32653	0.120093	1.31318e-30	4.16206e-29
YBR159W	IFA38	134.175	0.956253	0.034793	5.17095e-167	2.37999e-165	0.794348	0.0389744	3.66636e-93	1.71735e-91	0.156739	0.0516503	0.00210573	0.00521799
YBR160W	CDC28	59.278	-0.535388	0.0497557	3.21023e-27	1.22419e-26	-0.139893	0.0555692	0.0108033	0.0156963	-0.378758	0.0737774	1.32737e-07	6.79334e-07
YBR161W	CSH1	26.8307	-0.406089	0.0790008	2.04664e-07	3.67964e-07	-0.604031	0.088251	2.36468e-12	7.55813e-12	0.185569	0.112773	0.0802886	0.132019
YBR162C	TOS1	298.893	0.169774	0.0385023	9.71696e-06	1.59528e-05	-0.823564	0.0412889	2.13893e-89	9.2798e-88	0.987261	0.056902	8.25568e-70	1.09243e-67
YBR163W	EXO5	11.4983	1.33611	0.120924	1.16726e-29	4.73796e-29	1.327	0.13663	7.00779e-24	4.12594e-23	-0.00107719	0.16016	0.993901	1
YBR164C	ARL1	108.201	-0.340724	0.0418966	3.43799e-16	9.09865e-16	-0.307864	0.0463606	2.115e-11	6.36424e-11	-0.029948	0.0615648	0.620521	0.707544
YBR165W	UBS1	15.9789	-0.397037	0.099403	4.86052e-05	7.65449e-05	-0.39204	0.110649	0.000217887	0.000384681	0.00582723	0.137656	0.963074	0.980987
YBR166C	TYR1	52.5178	-1.03695	0.0516167	1.32639e-90	1.88725e-89	-0.924032	0.0589416	1.94201e-56	3.89359e-55	-0.104089	0.0762907	0.161048	0.237114
YBR167C	POP7	37.7578	-0.973885	0.065704	1.87814e-50	1.21232e-49	-0.244557	0.0733948	0.000663214	0.00110878	-0.689868	0.0989459	2.13431e-13	1.96127e-12
YBR168W	PEX32	12.4082	1.20839	0.121239	1.71585e-24	5.93205e-24	1.21622	0.136492	1.7376e-20	8.69293e-20	-0.0150506	0.160347	0.915093	0.944538
YBR169C	SSE2	25.5991	-0.276944	0.0848442	0.000942974	0.00133955	-0.753344	0.095883	6.87308e-16	2.72503e-15	0.437398	0.123642	0.000124262	0.000396216
YBR170C	NPL4	25.9493	-0.905081	0.0810445	1.30712e-29	5.28539e-29	-0.535049	0.0920983	2.3952e-09	6.37815e-09	-0.323695	0.117421	0.00316367	0.00752929
YBR171W	SEC66	111.414	-0.14718	0.0426167	0.000526142	0.000765915	0.138427	0.0467174	0.00279371	0.00437417	-0.278993	0.0625838	5.50556e-06	2.18776e-05
YBR172C	SMY2	71.5585	-0.684158	0.0483937	9.61906e-46	5.76599e-45	-0.695927	0.0539208	9.22497e-39	1.00057e-37	0.0140575	0.0708762	0.839091	0.884899
YBR173C	UMP1	179.377	-0.558412	0.0415266	1.85441e-41	1.02995e-40	-0.547798	0.0455611	1.01956e-33	9.22482e-33	-0.00831317	0.060706	0.889386	0.925402
YBR174C	YBR174C
YBR175W	SWD3	39.5511	-1.46168	0.0692417	2.28758e-100	3.85611e-99	-1.33624	0.0791292	1.49974e-65	3.76216e-64	-0.110628	0.100245	0.247368	0.33815
YBR176W	ECM31	33.7689	-1.13372	0.0641759	8.08159e-71	7.66593e-70	-0.959396	0.0732791	2.85344e-40	3.29765e-39	-0.156609	0.0936497	0.0808599	0.132875
YBR177C	EHT1	33.9031	0.225932	0.0742759	0.00211243	0.00292393	-0.475631	0.0814633	2.39369e-09	6.37815e-09	0.66953	0.110487	8.97976e-11	6.51987e-10
YBR178W	YBR178W
YBR179C	FZO1	25.6131	-0.866946	0.0827769	2.88001e-26	1.06008e-25	-0.857331	0.0926927	2.60401e-21	1.36196e-20	-0.0016359	0.11662	0.98806	0.997863
YBR180W	DTR1	4.25633	1.54699	0.266976	1.66222e-10	3.46383e-10	1.00808	0.282735	2.1985e-05	4.23923e-05	0.236721	0.276462	0.198311	0.281259
YBR181C	RPS6B
YBR182C	SMP1	5.72314	-2.03011	0.198481	9.21927e-27	3.45837e-26	-1.6015	0.223471	1.0734e-14	3.98421e-14	-0.237698	0.233015	0.178258	0.257581
YBR183W	YPC1	3.86191	-0.692418	0.208632	0.000353206	0.000523968	-0.285684	0.217876	0.128949	0.15906	-0.225943	0.246754	0.209258	0.29356
YBR184W	YBR184W	5.43178	-0.993135	0.177447	3.53359e-09	6.93228e-09	-0.741161	0.20078	3.8007e-05	7.17443e-05	-0.136914	0.215888	0.417616	0.515735
YBR185C	MBA1	54.5579	-1.65231	0.0672557	5.31669e-135	1.53777e-133	-0.862923	0.073114	4.28441e-33	3.76701e-32	-0.744801	0.0995943	2.72388e-15	2.82143e-14
YBR186W	PCH2	0.352812	-0.123786	0.54707	0.703444	0.728778	0.0363225	0.483392	0.882478	0.9026	-0.0478407	0.415145	0.791346	0.846694
YBR187W	GDT1	136.389	-0.256214	0.0503792	3.22387e-07	5.72808e-07	0.382129	0.0540867	9.24278e-13	3.04621e-12	-0.623523	0.073825	3.77621e-18	4.95967e-17
YBR188C	NTC20	20.0736	0.235282	0.0774067	0.00211148	0.00292338	0.35863	0.0892037	3.49079e-05	6.61064e-05	-0.118472	0.112502	0.263833	0.356423
YBR189W	RPS9B	1800.08	-3.97985	0.100141	0	0	-3.46493	0.104556	2.18308e-242	7.22191e-240	-0.445832	0.137837	0.000370946	0.00108716
YBR190W	YBR190W
YBR191W	RPL21A	1715.28	-0.311123	0.0444145	2.07805e-12	4.67054e-12	0.15643	0.0462375	0.000642235	0.0010754	-0.457102	0.0637443	2.5324e-13	2.31503e-12
YBR192W	RIM2	52.8365	-0.732933	0.0605352	3.62521e-34	1.64423e-33	-0.113047	0.0652239	0.0780132	0.0997159	-0.591011	0.088911	3.83061e-12	3.18295e-11
YBR193C	MED8	12.5872	-0.607073	0.10465	3.36971e-09	6.62552e-09	-0.387776	0.118568	0.000595778	0.00100141	-0.171999	0.145884	0.19115	0.272858
YBR194W	AIM4	30.3318	-0.754385	0.0791397	5.42413e-22	1.72639e-21	-0.452042	0.0876529	1.20559e-07	2.83734e-07	-0.266153	0.113012	0.0123632	0.0254922
YBR195C	MSI1	35.0494	-0.33579	0.065166	2.0939e-07	3.76078e-07	-0.405611	0.0732457	1.66193e-08	4.16111e-08	0.069848	0.0945968	0.440115	0.538339
YBR196C	PGI1	1285.23	0.699767	0.0395781	2.44307e-70	2.28466e-69	0.195723	0.0413092	1.82341e-06	3.86825e-06	0.492451	0.0569603	1.3975e-18	1.88218e-17
YBR197C	YBR197C	1.73191	0.546294	0.264202	0.0202972	0.0258626	0.386392	0.276136	0.0824317	0.105059	0.0487416	0.275894	0.801863	0.854664
YBR198C	TAF5	39.1962	0.851632	0.0632032	5.84904e-42	3.29351e-41	0.387942	0.0702705	1.90883e-08	4.74341e-08	0.431765	0.092736	1.12043e-06	4.97103e-06
YBR199W	KTR4	94.3184	1.04439	0.0463674	3.4079e-113	7.15794e-112	0.619003	0.0515942	1.09492e-33	9.87289e-33	0.407847	0.0685079	1.02562e-09	6.702e-09
YBR200W	BEM1	27.9764	-0.544148	0.0745516	1.71587e-13	4.0365e-13	-0.888992	0.0844869	6.94867e-27	4.66151e-26	0.320212	0.108271	0.00171338	0.00433505
YBR201W	DER1	20.1791	-0.174578	0.0893231	0.047196	0.0578126	-0.0912095	0.0983783	0.336756	0.382254	-0.0702556	0.126062	0.547329	0.639941
YBR202W	MCM7	37.7907	-0.466443	0.0599551	4.97731e-15	1.24562e-14	-0.803055	0.068833	2.71084e-32	2.28479e-31	0.321051	0.0889214	0.000170429	0.000530013
YBR203W	COS111	8.12202	-1.96352	0.177236	1.17703e-30	4.8672e-30	-1.31288	0.189158	1.01371e-13	3.53462e-13	-0.429538	0.224997	0.014041	0.0285622
YBR204C	LDH1	19.5746	-0.838626	0.0929409	4.99781e-20	1.49878e-19	-0.689685	0.104364	8.66538e-12	2.68065e-11	-0.118802	0.129824	0.320478	0.418527
YBR205W	KTR3	110.345	0.274034	0.0490733	2.03808e-08	3.84446e-08	-0.117978	0.0530573	0.0245276	0.0340121	0.380105	0.0715649	5.01503e-08	2.75358e-07
YBR206W	YBR206W
YBR207W	FTH1	58.5692	0.514447	0.0561886	3.40248e-20	1.02676e-19	0.321382	0.0623449	1.66574e-07	3.87039e-07	0.179559	0.0818967	0.0233656	0.044943
YBR208C	DUR1,2	40.4732	1.64847	0.13636	2.26545e-35	1.06209e-34	1.72633	0.146301	4.87741e-34	4.45875e-33	-0.0616611	0.171934	0.677388	0.754983
YBR209W	YBR209W
YBR210W	ERV15	39.9524	1.43307	0.0670154	7.30612e-103	1.27208e-101	1.36549	0.075631	1.82216e-74	5.44899e-73	0.0589681	0.0965941	0.523372	0.619614
YBR211C	AME1	18.7737	1.07404	0.0898545	7.97876e-34	3.58807e-33	1.36809	0.105285	3.24788e-40	3.74532e-39	-0.25962	0.129236	0.0290484	0.0546969
YBR212W	NGR1	50.8822	-0.111978	0.0549656	0.0403482	0.0498652	-0.825031	0.0622565	5.77399e-41	6.88327e-40	0.692798	0.0831357	3.94286e-18	5.16573e-17
YBR213W	MET8	19.1445	0.114891	0.0907393	0.198377	0.226344	-0.0257032	0.0992289	0.788429	0.818426	0.124971	0.127875	0.291477	0.38744
YBR214W	SDS24	15.8425	0.522248	0.103388	2.68e-07	4.79717e-07	0.16629	0.113759	0.125376	0.155014	0.296986	0.14542	0.0230687	0.0445305
YBR215W	HPC2	19.7867	-0.182558	0.0840905	0.0277501	0.0349301	-0.522458	0.095013	1.51285e-08	3.79503e-08	0.313022	0.121344	0.00539586	0.0121948
YBR216C	YBP1	14.4913	0.0498646	0.101003	0.614973	0.645972	0.0374418	0.110179	0.722787	0.759981	0.00906079	0.140215	0.943183	0.965611
YBR217W	ATG12	12.8706	-0.918514	0.132091	7.48242e-13	1.71596e-12	-0.529732	0.14403	8.71717e-05	0.000159433	-0.286938	0.175731	0.0571921	0.0980622
YBR218C	PYC2	136.842	-0.460585	0.0497228	1.37878e-20	4.21355e-20	-0.696468	0.0539682	9.3627e-39	1.01343e-37	0.228842	0.0719754	0.00110813	0.00292097
YBR219C	YBR219C
YBR220C	YBR220C	35.9815	1.12672	0.07456	1.46006e-52	9.88247e-52	0.992514	0.0819406	6.29513e-35	5.90783e-34	0.116745	0.105241	0.242166	0.332632
YBR221C	PDB1	305.439	0.633826	0.0318175	1.31758e-88	1.78362e-87	0.256861	0.0344445	6.66072e-14	2.34409e-13	0.370101	0.0466353	9.65049e-16	1.05537e-14
YBR222C	PCS60	53.0694	0.684982	0.0654791	5.57615e-26	2.03129e-25	-0.175991	0.0702982	0.0106683	0.0155087	0.837094	0.0979029	1.83388e-19	2.67403e-18
YBR223C	TDP1	8.29495	-1.60461	0.142513	4.48754e-31	1.88213e-30	-1.88157	0.165185	4.00651e-32	3.36077e-31	0.206503	0.185917	0.183397	0.263926
YBR224W	YBR224W
YBR225W	YBR225W	7.074	0.263098	0.146501	0.0622623	0.075482	0.2562	0.158244	0.0779982	0.0997159	-0.00897787	0.188175	0.954346	0.973849
YBR226C	YBR226C
YBR227C	MCX1	41.3124	0.434378	0.0669503	6.25782e-11	1.32597e-10	0.194558	0.0728207	0.00635461	0.00951215	0.219688	0.096066	0.0167599	0.0334628
YBR228W	SLX1	9.03862	0.117881	0.127587	0.341591	0.37644	0.0782992	0.138313	0.545653	0.593535	0.0267522	0.170513	0.856178	0.898087
YBR229C	ROT2	25.7477	1.18644	0.0744574	3.2206e-58	2.43176e-57	0.787754	0.0842369	1.3158e-21	7.00657e-21	0.356173	0.108215	0.000466763	0.00133472
YBR230C	OM14	80.7773	0.225883	0.0560373	5.00087e-05	7.86615e-05	0.13596	0.0614677	0.0247378	0.0342947	0.0833021	0.081322	0.290133	0.386139
YBR231C	SWC5	23.5528	-0.263007	0.0769426	0.000548974	0.000796306	-0.199534	0.0873393	0.0186082	0.0262577	-0.0521307	0.111282	0.619437	0.70646
YBR232C	YBR232C
YBR233W	PBP2	25.5038	-0.421194	0.078344	5.55909e-08	1.02631e-07	-0.326392	0.0874094	0.00012179	0.000219938	-0.0790887	0.111777	0.45258	0.551247
YBR234C	ARC40	154.796	-0.395884	0.0343334	7.09387e-31	2.9542e-30	-0.532533	0.0385717	9.33615e-44	1.25104e-42	0.135292	0.051114	0.00733298	0.0160188
YBR235W	VHC1	47.1017	0.813925	0.0574738	4.70622e-46	2.83391e-45	0.572392	0.0645087	2.4774e-19	1.16455e-18	0.223676	0.0841193	0.00585402	0.0131072
YBR236C	ABD1	33.7188	0.72016	0.0681824	1.73466e-26	6.43418e-26	0.685875	0.0768181	9.92176e-20	4.79597e-19	0.0259182	0.0984096	0.782495	0.83943
YBR237W	PRP5	13.3684	0.301293	0.107203	0.00412676	0.0055736	-0.280125	0.118519	0.0128702	0.0184562	0.51858	0.156073	0.000170889	0.000531131
YBR238C	YBR238C	4.95344	-1.16905	0.17773	4.29587e-12	9.52577e-12	-0.167398	0.179549	0.300464	0.34603	-0.77955	0.271775	0.000104956	0.000339152
YBR239C	ERT1	9.54543	-0.647639	0.111668	3.07554e-09	6.05837e-09	-0.260717	0.124994	0.0273411	0.0377062	-0.310542	0.156574	0.0248434	0.0474715
YBR240C	THI2	1.65357	0.542393	0.264533	0.0213356	0.0271139	-0.212012	0.268181	0.328685	0.374135	0.467711	0.345132	0.0220621	0.0427757
YBR241C	YBR241C	10.8095	1.05079	0.117014	3.70242e-20	1.116e-19	0.314851	0.130904	0.0106245	0.0154535	0.612767	0.173869	3.85675e-05	0.000133598
YBR242W	YBR242W	62.7449	-0.72719	0.0465491	1.97665e-55	1.42345e-54	0.0573341	0.0520707	0.265837	0.309996	-0.769294	0.0704707	3.62837e-29	1.02154e-27
YBR243C	ALG7	60.7458	0.023237	0.0495346	0.637319	0.666798	-0.4968	0.0558701	2.62613e-19	1.23337e-18	0.505975	0.0741353	1.94721e-12	1.66235e-11
YBR244W	GPX2	193.014	-1.53957	0.080283	1.57678e-83	1.87128e-82	-1.18111	0.0850067	2.64624e-45	3.72515e-44	-0.318861	0.111587	0.00239107	0.00586737
YBR245C	ISW1	56.2132	0.24069	0.0553492	1.21979e-05	1.99394e-05	0.0820487	0.0606784	0.17018	0.205794	0.14957	0.0804979	0.0553064	0.0954784
YBR246W	RRT2	69.4766	-0.681334	0.048209	1.03179e-45	6.17792e-45	-0.391635	0.0538733	2.03412e-13	6.93724e-13	-0.275728	0.0710922	7.03278e-05	0.000235152
YBR247C	ENP1	115.254	-0.123327	0.0370637	0.000845461	0.00120751	0.101399	0.0408563	0.0124704	0.0179363	-0.220626	0.0547015	4.29852e-05	0.000148029
YBR248C	HIS7	90.5916	0.963307	0.0512394	1.3975e-79	1.56054e-78	0.105532	0.0553335	0.0535509	0.0706846	0.837774	0.0763575	7.25038e-30	2.14393e-28
YBR249C	ARO4	318.044	0.277461	0.0380668	2.71288e-13	6.33124e-13	0.253406	0.0405169	3.02898e-10	8.47827e-10	0.0221791	0.0549531	0.682339	0.759368
YBR250W	SPO23	1.51562	-0.131582	0.27975	0.592925	0.6243	-0.238808	0.291035	0.295157	0.340734	0.0760204	0.293143	0.663014	0.743061
YBR251W	MRPS5	54.52	-0.623549	0.0616202	2.26459e-24	7.80879e-24	0.221921	0.0672331	0.000774914	0.00128658	-0.824313	0.0926155	9.81799e-21	1.55124e-19
YBR252W	DUT1	239.382	-0.749886	0.0341522	2.66558e-107	5.07514e-106	-0.275643	0.0372701	1.01916e-13	3.55128e-13	-0.464991	0.0503229	8.95718e-21	1.41947e-19
YBR253W	SRB6	60.2395	-0.733644	0.0507646	9.17746e-48	5.68144e-47	-0.87345	0.0580516	3.97909e-52	7.11531e-51	0.136175	0.0752342	0.0630842	0.106645
YBR254C	TRS20	23.766	-0.782465	0.0773323	1.49229e-24	5.17947e-24	-0.464622	0.0872219	4.65463e-08	1.11935e-07	-0.28062	0.111763	0.00771987	0.0167877
YBR255W	MTC4	15.1947	-0.0535697	0.0952056	0.567193	0.60007	-0.133494	0.107657	0.195754	0.2341	0.0744771	0.13525	0.547047	0.639753
YBR256C	RIB5	58.2739	0.226733	0.0603132	0.000153235	0.000233134	0.633954	0.0671589	1.05183e-21	5.63497e-21	-0.389524	0.088453	4.55481e-06	1.83755e-05
YBR257W	POP4	40.8828	-0.295348	0.0574742	2.35201e-07	4.21721e-07	-0.234292	0.0650864	0.000250257	0.000438323	-0.0542116	0.0845437	0.507835	0.604175
YBR258C	SHG1	21.1942	-0.815574	0.0806543	1.43998e-24	5.00117e-24	-0.494632	0.0910604	2.39263e-08	5.90129e-08	-0.280223	0.116175	0.00991996	0.0209105
YBR259W	YBR259W	8.40673	-0.402099	0.131214	0.00159821	0.00222907	-0.284245	0.145166	0.0351889	0.0477453	-0.0773893	0.174121	0.605685	0.694642
YBR260C	RGD1	27.4798	0.0782091	0.0763047	0.299894	0.333264	0.0157697	0.0837355	0.846774	0.87164	0.0565572	0.109123	0.583171	0.674693
YBR261C	TAE1	73.6191	-0.938018	0.0529892	8.13985e-71	7.70738e-70	-0.594489	0.0586511	1.24174e-24	7.58955e-24	-0.324166	0.0775156	1.69941e-05	6.24217e-05
YBR262C	MIC12	126.713	-0.786773	0.0490529	2.19594e-58	1.66282e-57	-0.0798085	0.0526229	0.125242	0.154885	-0.688146	0.0722802	1.31846e-22	2.43157e-21
YBR263W	SHM1	188.093	-0.960865	0.0338428	4.75638e-178	2.56893e-176	-0.906474	0.0373026	1.85329e-131	1.96189e-129	-0.0520633	0.049797	0.290846	0.386795
YBR264C	YPT10	37.7653	0.0242988	0.0627982	0.696571	0.72194	-0.0520622	0.0702292	0.450101	0.49889	0.0726948	0.0918046	0.410262	0.509148
YBR265W	TSC10	73.9112	-0.504356	0.0457189	1.72974e-28	6.79696e-28	-0.261111	0.0513318	2.71847e-07	6.20746e-07	-0.232444	0.0677046	0.000451327	0.00129478
YBR266C	SLM6
YBR267W	REI1	98.3099	0.0319703	0.0423558	0.44868	0.483778	0.536548	0.046968	1.25282e-30	9.8678e-30	-0.494349	0.0628871	1.07174e-15	1.16365e-14
YBR268W	MRPL37	86.0259	-0.62492	0.0569576	2.60273e-28	1.0167e-27	0.110782	0.0613123	0.0666889	0.0863676	-0.714712	0.0843658	1.28855e-18	1.7488e-17
YBR269C	SDH8	46.6123	0.336948	0.0722627	2.53614e-06	4.28875e-06	0.469196	0.0807513	2.88325e-09	7.6229e-09	-0.127111	0.10387	0.197096	0.279837
YBR270C	BIT2	6.67371	-0.113642	0.137926	0.394314	0.429357	-0.0818234	0.148923	0.553901	0.601148	-0.019139	0.181376	0.900849	0.933659
YBR271W	EFM2	31.1693	0.480127	0.0706852	7.3602e-12	1.61784e-11	0.649496	0.0794596	7.87034e-17	3.28531e-16	-0.161298	0.102002	0.0963766	0.15379
YBR272C	HSM3	22.2117	-0.326218	0.0836713	7.91826e-05	0.000123015	-0.0645866	0.0918998	0.468512	0.517279	-0.232566	0.119512	0.0368997	0.0673019
YBR273C	UBX7	20.8092	-0.165682	0.0818795	0.0403551	0.0498652	-0.174509	0.0916185	0.0491872	0.0652828	0.0129059	0.11702	0.90632	0.937759
YBR274W	CHK1	21.3585	-0.00249307	0.086268	0.976623	0.980141	0.142969	0.0947935	0.118728	0.14738	-0.13414	0.122192	0.237999	0.327458
YBR275C	RIF1	20.8073	0.12658	0.0912042	0.158516	0.183073	-0.132867	0.0993107	0.165176	0.200384	0.234332	0.128674	0.0485686	0.0853781
YBR276C	PPS1	54.8787	1.0027	0.0581663	2.22429e-67	1.97205e-66	0.595087	0.0637932	3.47376e-21	1.80438e-20	0.381997	0.0845956	2.71147e-06	1.14084e-05
YBR277C	YBR277C
YBR278W	DPB3	46.7067	-0.387328	0.0563092	4.66115e-12	1.03142e-11	-0.19687	0.0637442	0.00169066	0.00271008	-0.177341	0.0831225	0.0275103	0.0520972
YBR279W	PAF1	47.3227	0.455137	0.060004	2.31992e-14	5.65087e-14	0.648789	0.0671074	1.09825e-22	6.14486e-22	-0.186239	0.0873849	0.0270413	0.0513009
YBR280C	SAF1	6.88714	-0.293211	0.156789	0.0510272	0.0623181	0.0524404	0.166029	0.729652	0.766432	-0.258084	0.204699	0.119066	0.183469
YBR281C	DUG2	36.0782	0.746923	0.0679248	1.43781e-28	5.67088e-28	0.521756	0.075205	1.60523e-12	5.16816e-12	0.20282	0.097711	0.0293691	0.0551438
YBR282W	MRPL27	95.5418	-1.73916	0.0574326	2.87123e-203	2.14048e-201	-0.884701	0.0621108	5.0823e-47	7.64222e-46	-0.822631	0.0851651	9.85161e-24	1.96032e-22
YBR283C	SSH1	267.781	0.27153	0.0278899	1.85292e-22	5.97654e-22	-0.160928	0.0304333	1.10521e-07	2.60923e-07	0.428326	0.0411636	8.77397e-26	1.95129e-24
YBR284W	YBR284W	1.83782	-0.54087	0.24601	0.015024	0.0193956	0.0951665	0.245749	0.642294	0.685297	-0.385533	0.304262	0.0489859	0.085912
YBR285W	YBR285W	2.47813	0.729499	0.240308	0.000830317	0.0011878	-0.040557	0.239578	0.840394	0.865982	0.47933	0.316632	0.0175796	0.0349545
YBR286W	APE3	288.023	0.53656	0.0411814	5.05554e-39	2.63895e-38	0.277306	0.0437939	1.74738e-10	4.94328e-10	0.250758	0.0594202	1.754e-05	6.41153e-05
YBR287W	YBR287W	37.781	0.137354	0.0792807	0.0794232	0.0951101	0.586548	0.0874104	6.34955e-12	1.97812e-11	-0.417806	0.114586	9.8356e-05	0.000318799
YBR288C	APM3	46.4187	1.02023	0.0581348	9.24467e-70	8.53962e-69	0.939638	0.0651629	3.2752e-48	5.19031e-47	0.0721321	0.0844786	0.376645	0.475455
YBR289W	SNF5	38.435	0.300767	0.0634211	1.78503e-06	3.05075e-06	-0.0783319	0.0703782	0.256692	0.300059	0.358745	0.0931537	5.64619e-05	0.000191789
YBR290W	BSD2	30.4562	0.283206	0.0718486	6.93121e-05	0.000108125	0.448488	0.0809748	1.48563e-08	3.73382e-08	-0.157615	0.103893	0.109798	0.171789
YBR291C	CTP1	35.9633	0.833003	0.0786919	9.71016e-27	3.63478e-26	0.629849	0.0841982	2.08955e-14	7.59614e-14	0.177541	0.109726	0.0869501	0.141261
YBR292C	YBR292C
YBR293W	VBA2	7.45226	1.02592	0.149737	1.07386e-12	2.43946e-12	0.136004	0.156346	0.345026	0.391054	0.722741	0.225958	5.36396e-05	0.000182581
YBR294W	SUL1	14.027	-0.457522	0.177494	0.00653949	0.00868377	0.341279	0.185439	0.0398649	0.0536362	-0.645692	0.259939	0.000877722	0.00236909
YBR295W	PCA1	19.2457	-1.30112	0.10815	1.45927e-34	6.67584e-34	-1.27781	0.119968	5.10408e-28	3.61175e-27	-0.0126962	0.145321	0.922913	0.949831
YBR296C	PHO89	7.09611	2.13285	0.204463	8.7924e-28	3.38706e-27	-0.466733	0.217558	0.0135208	0.0193472	2.62281	0.31283	2.16454e-19	3.11329e-18
YBR297W	MAL33
YBR298C	MAL31
YBR299W	MAL32
YBR300C	YBR300C
YBR301W	PAU24
YBR302C	COS2
YCL001W	RER1	189.624	0.064539	0.0396836	0.102721	0.121552	0.041948	0.0429216	0.324949	0.370202	0.0217164	0.0578475	0.702754	0.77651
YCL002C	YCL002C	25.6955	-0.0448434	0.0814153	0.576994	0.609344	0.301114	0.0891689	0.00050078	0.000849833	-0.320799	0.116469	0.00325448	0.00772466
YCL004W	PGS1	7.37348	0.181671	0.137895	0.173067	0.198708	0.507568	0.157939	0.000513098	0.000869622	-0.26907	0.187068	0.0867968	0.141088
YCL005W	LDB16	33.0598	0.249683	0.07206	0.000467549	0.000685523	0.443066	0.0801088	1.57507e-08	3.94924e-08	-0.183374	0.103551	0.0623891	0.105638
YCL007C	YCL007C
YCL008C	STP22	39.7125	0.0517536	0.0723179	0.469702	0.504696	-0.143816	0.0793046	0.0631318	0.0820821	0.183743	0.103874	0.0629374	0.106499
YCL009C	ILV6	418.065	-0.184594	0.0349314	1.17062e-07	2.13143e-07	-0.408637	0.0373876	4.53716e-28	3.22352e-27	0.220872	0.0507065	1.03554e-05	3.93759e-05
YCL010C	SGF29	6.73715	0.586815	0.159078	0.000117036	0.000179974	0.396308	0.176137	0.0129465	0.0185556	0.113099	0.201404	0.490359	0.586679
YCL011C	GBP2	114.02	0.186021	0.0381737	1.01939e-06	1.75582e-06	0.307032	0.04247	3.29254e-13	1.11003e-12	-0.119588	0.056421	0.0314239	0.0584218
YCL014W	BUD3	27.4468	-0.733568	0.0784286	3.17651e-21	9.93691e-21	-1.24584	0.0891028	6.53091e-46	9.47071e-45	0.469624	0.115098	1.20115e-05	4.51221e-05
YCL016C	DCC1	19.4796	-0.326799	0.0845635	9.10848e-05	0.00014101	-0.146234	0.0960845	0.115092	0.143303	-0.155337	0.121988	0.170992	0.249122
YCL017C	NFS1	51.4465	-0.0749832	0.0658794	0.25092	0.28156	0.41735	0.072385	4.29213e-09	1.11913e-08	-0.469529	0.0964162	3.24691e-07	1.56806e-06
YCL018W	LEU2	28.4886	-3.68969	0.141227	3.70844e-152	1.42237e-150	-3.09324	0.154574	2.09736e-91	9.48831e-90	-0.453185	0.190894	0.0044478	0.0102402
YCL019W	YCL019W
YCL020W	YCL020W
YCL022C	YCL022C
YCL023C	YCL023C
YCL024W	KCC4	9.62716	0.632186	0.12492	1.99502e-07	3.59172e-07	0.125072	0.135272	0.32452	0.369793	0.406479	0.174803	0.00672199	0.0148124
YCL025C	AGP1	41.1033	0.475748	0.114946	2.30417e-05	3.70699e-05	0.385846	0.122639	0.00092086	0.001517	0.0630011	0.152808	0.643421	0.726147
YCL027W	FUS1	2.73547	-0.687493	0.278108	0.00502157	0.00674255	-0.933073	0.331561	0.000372702	0.000640075	0.147159	0.289554	0.401107	0.499074
YCL028W	RNQ1	59.8461	0.344352	0.0555562	4.63119e-10	9.50112e-10	0.210012	0.0613426	0.000507883	0.000861334	0.124718	0.0808636	0.111647	0.174218
YCL029C	BIK1	46.3298	0.246229	0.0610525	4.87536e-05	7.67558e-05	0.349532	0.0678553	1.59628e-07	3.71716e-07	-0.101043	0.0885424	0.235453	0.324376
YCL030C	HIS4	278.554	1.68578	0.0740564	1.79163e-116	3.9349e-115	0.551535	0.0772684	3.49103e-13	1.1747e-12	1.09708	0.110017	5.79191e-26	1.30454e-24
YCL031C	RRP7	105.494	-0.0479708	0.0526209	0.359249	0.394258	0.140468	0.0568486	0.0123054	0.0177087	-0.182292	0.0761194	0.013842	0.0282225
YCL032W	STE50	33.4439	-0.00910882	0.0703555	0.896003	0.908533	0.190728	0.078851	0.0131795	0.0188742	-0.188772	0.102283	0.0519393	0.0903434
YCL033C	MXR2	71.4022	-0.0191408	0.0575446	0.737755	0.762237	0.233958	0.0642853	0.000214861	0.000379592	-0.243333	0.0844549	0.0028568	0.00688422
YCL034W	LSB5	76.7529	-0.183532	0.053331	0.000537278	0.00078041	-0.449784	0.0590783	1.31442e-14	4.85501e-14	0.257407	0.0779875	0.000671	0.00185172
YCL035C	GRX1	159.343	0.046954	0.0489228	0.334797	0.369491	0.0165439	0.0529483	0.75214	0.787241	0.029102	0.0709748	0.674436	0.752486
YCL036W	GFD2	57.3069	-0.211544	0.0551217	0.000112974	0.000174032	0.184681	0.0613902	0.00225239	0.00356517	-0.381605	0.0813773	1.21651e-06	5.3748e-06
YCL037C	SRO9	47.7294	-0.140845	0.0881372	0.104782	0.123797	0.0751945	0.0929688	0.403765	0.452015	-0.195612	0.122589	0.086817	0.141088
YCL038C	ATG22	7.52511	-0.794212	0.146458	1.79862e-08	3.4049e-08	-1.35793	0.176012	2.87446e-16	1.16408e-15	0.428649	0.204869	0.00998314	0.0210353
YCL039W	GID7	15.4219	0.359864	0.0918432	7.01899e-05	0.000109366	0.26411	0.103438	0.00786257	0.011628	0.0752316	0.129786	0.529351	0.625135
YCL040W	GLK1	108.356	1.85039	0.0988756	3.87877e-80	4.36815e-79	1.1158	0.105243	1.34233e-27	9.2875e-27	0.644658	0.142113	4.41763e-07	2.09146e-06
YCL041C	YCL041C
YCL042W	YCL042W
YCL043C	PDI1	438.329	0.266653	0.0363661	1.97788e-13	4.64048e-13	0.192123	0.0387907	6.21883e-07	1.3784e-06	0.0718558	0.0526398	0.166938	0.244291
YCL044C	MGR1	55.6	-0.134505	0.0554606	0.0146512	0.018956	-0.105266	0.0615754	0.0827159	0.105396	-0.0261604	0.0810763	0.739193	0.80747
YCL045C	EMC1	120.865	0.153612	0.0394374	9.3004e-05	0.000143939	-0.409828	0.0437368	3.93062e-21	2.03172e-20	0.554344	0.0587072	5.77442e-22	1.00871e-20
YCL046W	YCL046W
YCL047C	POF1	16.6692	-0.0439135	0.0937803	0.634115	0.66397	0.125265	0.103853	0.209489	0.248951	-0.152632	0.132506	0.209937	0.294278
YCL048W	SPS22	0.69131	1.01275	0.537995	0.00639753	0.00849953	0.102114	0.40398	0.688246	0.727268	0.276193	0.445787	0.102914	0.162701
YCL049C	YCL049C	19.2863	-1.43792	0.115643	6.43057e-37	3.15158e-36	-0.976361	0.129367	3.2295e-15	1.23243e-14	-0.363459	0.159343	0.00951274	0.0201565
YCL050C	APA1	359.844	-0.0235739	0.035432	0.504721	0.53839	0.00762242	0.0378699	0.839604	0.865438	-0.0306431	0.0514431	0.546211	0.63934
YCL051W	LRE1	26.1474	-0.0388803	0.0846967	0.641718	0.671135	-0.0928441	0.0919658	0.297548	0.342971	0.0511329	0.119344	0.64644	0.728776
YCL052C	PBN1	26.0147	0.336047	0.0900259	0.000153176	0.000233111	0.684788	0.0998047	1.55589e-12	5.02462e-12	-0.316768	0.127611	0.00711418	0.0155923
YCL054W	SPB1	156.077	-0.228346	0.0487951	2.58391e-06	4.36675e-06	-0.100847	0.0519817	0.0498859	0.0660942	-0.121598	0.070162	0.07633	0.126452
YCL055W	KAR4	17.6179	-0.349798	0.0885928	6.27142e-05	9.81509e-05	-0.120919	0.0985055	0.203199	0.24207	-0.197725	0.126257	0.0905808	0.146038
YCL056C	PEX34	35.149	-0.604047	0.06952	1.90762e-18	5.47263e-18	-0.564984	0.0785866	2.29831e-13	7.80306e-13	-0.0298662	0.100516	0.755373	0.819637
YCL057W	PRD1	125.286	-0.0405096	0.0488201	0.404372	0.439818	-0.168187	0.0531524	0.00136901	0.00221392	0.124592	0.0709861	0.0720983	0.120118
YCL058C	FYV5
YCL059C	KRR1	157.168	0.325358	0.0405089	7.97976e-16	2.07961e-15	0.479216	0.0444552	1.97954e-27	1.36074e-26	-0.151453	0.05934	0.00952113	0.0201662
YCL061C	MRC1	21.3786	0.753987	0.0843733	1.41839e-19	4.2059e-19	0.588395	0.0941983	1.35734e-10	3.87089e-10	0.138521	0.119211	0.212987	0.298002
YCL063W	VAC17	21.3367	-0.699498	0.101396	2.13769e-12	4.7944e-12	-0.210197	0.108028	0.0421217	0.056572	-0.419292	0.142559	0.00110893	0.00292165
YCL064C	CHA1	129.456	3.63032	0.100743	4.26391e-286	6.6379e-284	0.782722	0.103373	5.69486e-15	2.13931e-14	2.79878	0.145318	3.38859e-83	7.79818e-81
YCL065W	YCL065W
YCL066W	HMLALPHA1
YCL067C	HMLALPHA2
YCL068C	YCL068C
YCL069W	VBA3
YCL074W	YCL074W
YCL075W	YCL075W
YCL076W	YCL076W
YCR001W	YCR001W
YCR002C	CDC10	130.91	-0.805969	0.0424879	9.33158e-81	1.05992e-79	-0.667332	0.047141	4.28033e-46	6.27584e-45	-0.131924	0.0624307	0.0312172	0.058119
YCR003W	MRPL32	62.1732	-1.03775	0.0691472	9.43194e-52	6.30344e-51	0.0995015	0.0735435	0.167179	0.202628	-1.12092	0.104331	2.32692e-29	6.65751e-28
YCR004C	YCP4	128.079	0.348278	0.0499583	2.53944e-12	5.67621e-12	0.241939	0.0541119	6.03192e-06	1.22185e-05	0.0996946	0.0722366	0.157171	0.23244
YCR005C	CIT2	35.9945	0.206434	0.12603	0.0919367	0.109304	-0.00888595	0.129375	0.942016	0.950625	0.174947	0.166049	0.22691	0.314489
YCR006C	YCR006C
YCR007C	YCR007C
YCR008W	SAT4	86.5338	0.102965	0.0540917	0.0554648	0.0674576	-0.0844371	0.0584093	0.142937	0.175293	0.180347	0.0781928	0.0174543	0.0347315
YCR009C	RVS161	49.7164	0.218078	0.0709788	0.00191942	0.00266304	0.372306	0.0776024	9.38142e-07	2.03925e-06	-0.147238	0.101177	0.126661	0.19365
YCR010C	ADY2	0.563201	1.00691	0.451904	0.0031636	0.00431682	0.138342	0.365639	0.580944	0.627326	0.297336	0.411565	0.118637	0.182968
YCR011C	ADP1	48.4326	0.442712	0.0652768	8.42339e-12	1.8477e-11	-0.343802	0.073173	1.63463e-06	3.48173e-06	0.761852	0.0991384	4.80323e-16	5.43238e-15
YCR012W	PGK1	2641.91	-0.238827	0.0404553	3.17964e-09	6.2611e-09	-0.0501689	0.0420468	0.229585	0.270826	-0.183591	0.0577717	0.00124837	0.00325179
YCR013C	YCR013C
YCR014C	POL4	62.2694	-0.378657	0.0925287	3.2843e-05	5.24556e-05	-0.0550606	0.096864	0.556459	0.603676	-0.284926	0.12854	0.0163625	0.0327435
YCR015C	CTO1	7.82551	-1.01244	0.140155	7.80072e-14	1.86239e-13	-0.444581	0.154574	0.00189211	0.00301473	-0.41979	0.192086	0.00869985	0.0186355
YCR016W	YCR016W	83.4345	-0.118669	0.0545759	0.0286681	0.0360001	0.198371	0.0593744	0.000700082	0.00116783	-0.305825	0.0793226	7.00725e-05	0.000234595
YCR017C	CWH43	91.217	0.399118	0.049934	1.00239e-15	2.59065e-15	-0.0442929	0.0544102	0.4103	0.458555	0.428669	0.0733155	1.75452e-09	1.11888e-08
YCR018C	SRD1
YCR019W	MAK32	24.5718	-0.764557	0.0819984	3.83303e-21	1.19413e-20	-0.851754	0.0926422	4.45359e-21	2.29531e-20	0.0843383	0.116329	0.438747	0.53707
YCR020C	PET18	9.35063	-0.429278	0.118062	0.000196412	0.000296522	0.0260635	0.129211	0.83086	0.857594	-0.379453	0.166815	0.00902065	0.0192453
YCR021C	HSP30	6.00751	-0.581383	0.185477	0.000889198	0.00126588	-0.613652	0.206555	0.000793038	0.00131502	0.0461169	0.221675	0.787533	0.843638
YCR022C	YCR022C
YCR023C	YCR023C	19.2368	0.86458	0.100013	1.35962e-18	3.92178e-18	0.582863	0.11031	4.10152e-08	9.91108e-08	0.22955	0.138389	0.0683887	0.114587
YCR024C	SLM5	17.3642	-0.594267	0.106928	1.43706e-08	2.73315e-08	0.416845	0.116295	0.000174579	0.000310291	-0.967203	0.167532	4.34972e-11	3.25644e-10
YCR025C	YCR025C
YCR026C	NPP1	39.1442	0.630239	0.0678504	7.65913e-21	2.36798e-20	0.470401	0.0760871	2.92086e-10	8.1843e-10	0.142088	0.0981289	0.12911	0.196826
YCR027C	RHB1	19.0098	-1.05794	0.090564	2.12803e-32	9.24008e-32	-0.814088	0.102082	2.08226e-16	8.51731e-16	-0.202569	0.127396	0.085642	0.139736
YCR028C	FEN2	11.274	-1.20327	0.112231	6.65474e-28	2.57294e-27	-0.766837	0.127515	2.95642e-10	8.27954e-10	-0.343947	0.156564	0.0130097	0.0267004
YCR030C	SYP1	61.7504	-0.485569	0.0595764	2.40772e-16	6.43314e-16	-0.656356	0.0658229	5.25498e-24	3.11823e-23	0.164639	0.086188	0.0473585	0.083604
YCR031C	RPS14A
YCR032W	BPH1	16.3391	1.60196	0.102773	1.96048e-56	1.42931e-55	1.70494	0.118275	5.61502e-49	9.11666e-48	-0.0899307	0.141895	0.484788	0.581197
YCR033W	SNT1	41.908	0.760502	0.0623796	1.20004e-34	5.50895e-34	0.508283	0.0688926	6.76229e-14	2.37826e-13	0.231597	0.0902025	0.00746288	0.0162824
YCR034W	ELO2	190.177	0.252522	0.0392297	1.07759e-10	2.2571e-10	0.366016	0.0424069	3.63741e-18	1.61111e-17	-0.112175	0.0570464	0.0459346	0.0813602
YCR035C	RRP43	58.2935	0.181165	0.0536122	0.00067598	0.000972537	0.480309	0.0597365	4.08146e-16	1.6366e-15	-0.288903	0.078703	0.000157512	0.000492445
YCR036W	RBK1	40.6102	0.611758	0.0770662	1.04851e-15	2.70587e-15	0.833798	0.0853204	1.86981e-23	1.08281e-22	-0.206472	0.109519	0.045723	0.0811032
YCR037C	PHO87	44.4995	-0.890404	0.0674735	2.15589e-40	1.16798e-39	-0.403214	0.0732144	1.9866e-08	4.93433e-08	-0.45124	0.0976237	1.22081e-06	5.38929e-06
YCR038C	BUD5	10.0924	0.139067	0.125752	0.255293	0.285982	-0.00323667	0.136306	0.979824	0.982982	0.113697	0.16929	0.437559	0.536111
YCR039C	MATALPHA2
YCR040W	MATALPHA1
YCR041W	YCR041W
YCR042C	TAF2	38.4135	-0.0093214	0.0728412	0.897136	0.909508	-0.328766	0.0808479	3.07275e-05	5.83569e-05	0.300295	0.105442	0.00262305	0.00636872
YCR043C	YCR043C	85.8318	0.0246978	0.057282	0.664292	0.691328	0.739422	0.0627775	9.40474e-33	8.16054e-32	-0.694067	0.0851872	2.39963e-17	2.96758e-16
YCR044C	PER1	40.8321	-1.07694	0.0800143	3.43752e-42	1.93974e-41	-1.10019	0.0879474	3.21937e-37	3.28326e-36	0.0250977	0.111934	0.811791	0.862274
YCR045C	RRT12	0.296172	-0.280001	0.548711	0.399671	0.435011	-0.104817	0.478437	0.674748	0.71486	-0.0370783	0.407898	1	1
YCR046C	IMG1	57.0042	-0.526439	0.0647758	2.70192e-16	7.19019e-16	0.506566	0.0710773	4.3287e-13	1.45011e-12	-1.01891	0.098602	2.65772e-27	6.60437e-26
YCR047C	BUD23	90.4194	0.10561	0.0454458	0.0195856	0.024992	0.412152	0.0506333	2.13314e-16	8.71195e-16	-0.298865	0.0671189	5.2998e-06	2.11075e-05
YCR048W	ARE1	77.2921	0.694202	0.0549685	6.10856e-37	2.99653e-36	0.230461	0.0604893	0.000110054	0.000199628	0.440726	0.0807591	1.64533e-08	9.48661e-08
YCR049C	YCR049C
YCR050C	YCR050C
YCR051W	YCR051W	135.189	0.903013	0.0440009	3.05178e-94	4.64168e-93	1.20595	0.0484848	5.34677e-138	6.5815e-136	-0.293737	0.0644545	3.37119e-06	1.39841e-05
YCR052W	RSC6	60.925	0.20265	0.0528013	0.000113626	0.000174984	0.393448	0.0589675	1.41206e-11	4.2905e-11	-0.185213	0.0774362	0.0137658	0.0281106
YCR053W	THR4	370.65	0.20302	0.034373	3.20662e-09	6.31188e-09	-0.175854	0.0367388	1.48069e-06	3.16659e-06	0.373455	0.0500374	3.9501e-14	3.76718e-13
YCR054C	CTR86	37.3242	-0.287376	0.078865	0.000228786	0.000344318	0.0559175	0.0849741	0.499132	0.548227	-0.315457	0.112668	0.00288081	0.00693097
YCR057C	PWP2	149.113	-0.389565	0.0455687	9.57817e-18	2.67956e-17	-0.220078	0.0490006	5.72191e-06	1.16261e-05	-0.161989	0.0659081	0.0121557	0.0251057
YCR059C	YIH1	39.6254	0.159031	0.0634359	0.0114847	0.0149578	0.14007	0.070373	0.0423999	0.0568879	0.0150934	0.0920088	0.864685	0.905217
YCR060W	TAH1	86.7214	0.198915	0.0518835	0.00011585	0.000178254	0.507576	0.0578233	7.06262e-19	3.25347e-18	-0.298687	0.0762813	5.74204e-05	0.000194451
YCR061W	YCR061W	10.7455	0.456555	0.135665	0.000515286	0.000750319	0.979105	0.154986	1.89763e-11	5.72316e-11	-0.422393	0.188408	0.00740663	0.0161692
YCR063W	BUD31	2.73002	-0.187469	0.208616	0.333885	0.368562	0.137537	0.223297	0.472773	0.521439	-0.21303	0.253818	0.2412	0.331484
YCR064C	YCR064C
YCR065W	HCM1	24.2157	0.0780205	0.102934	0.439611	0.474967	-0.173433	0.109634	0.0981822	0.123615	0.22315	0.141684	0.0818513	0.134379
YCR066W	RAD18	19.6399	-0.749825	0.0973478	4.73945e-15	1.18722e-14	-0.474287	0.108204	5.22957e-06	1.06626e-05	-0.226613	0.135958	0.0681016	0.114215
YCR067C	SED4	68.9853	0.199631	0.0559158	0.000327346	0.000486835	-0.267232	0.0611941	9.27591e-06	1.84507e-05	0.45065	0.0819394	1.20251e-08	7.08786e-08
YCR068W	ATG15	0.603871	0.021319	0.38312	0.943472	0.950475	-0.038268	0.363604	0.877744	0.898453	0.026429	0.34415	0.764545	0.826202
YCR069W	CPR4	42.6594	0.488787	0.0646696	2.69247e-14	6.52829e-14	0.261967	0.0720465	0.000205758	0.000364058	0.207347	0.0939421	0.0213701	0.0415243
YCR071C	IMG2	56.6524	-1.27149	0.0732984	1.38642e-68	1.2459e-67	0.019301	0.0772709	0.798436	0.827839	-1.27619	0.109807	2.08044e-33	7.70053e-32
YCR072C	RSA4	85.2996	-0.91835	0.0510102	3.94084e-73	3.92823e-72	-0.627213	0.0560897	1.44211e-29	1.09513e-28	-0.275273	0.0743277	0.000141805	0.000447036
YCR073C	SSK22	19.6206	0.656728	0.087182	2.26827e-14	5.53157e-14	0.585924	0.0978007	6.77132e-10	1.86378e-09	0.053477	0.122779	0.639763	0.723407
YCR075C	ERS1	28.3807	0.094137	0.0788179	0.226694	0.256607	0.273761	0.0899845	0.00169945	0.00272333	-0.168571	0.114338	0.115437	0.178866
YCR076C	FUB1	19.2901	0.196547	0.0927308	0.0312198	0.0390383	0.0285936	0.102963	0.773021	0.805117	0.145633	0.13147	0.228947	0.316981
YCR077C	PAT1	48.2689	-0.933826	0.0787437	3.92336e-33	1.73197e-32	-0.323939	0.0838647	7.29503e-05	0.000134398	-0.558519	0.113599	1.44845e-07	7.34353e-07
YCR079W	PTC6	10.0593	-0.270437	0.114681	0.0157673	0.0203156	-0.401143	0.12894	0.000996119	0.00163538	0.119953	0.156758	0.388106	0.486557
YCR081W	SRB8	12.4656	-5.52355	0.156153	2.77886e-275	4.0857e-273	-5.89627	0.20449	6.73502e-184	1.54993e-181	0.252336	0.213399	0.015676	0.0315606
YCR082W	AHC2	89.1794	0.762694	0.0582424	1.21411e-39	6.45208e-39	0.834591	0.0645095	3.50282e-39	3.89505e-38	-0.0710452	0.0841847	0.38279	0.481489
YCR083W	TRX3	29.306	0.0919539	0.082196	0.257041	0.287818	0.644333	0.0926914	9.63512e-13	3.16762e-12	-0.513174	0.121369	4.93326e-06	1.9707e-05
YCR084C	TUP1	80.0919	-0.127415	0.0636776	0.043631	0.0536568	0.267805	0.0682812	6.45071e-05	0.000119383	-0.377374	0.0915928	1.72332e-05	6.31687e-05
YCR085W	YCR085W
YCR086W	CSM1	20.5467	-0.34665	0.0858107	4.28532e-05	6.78093e-05	-0.0920247	0.09615	0.322072	0.367478	-0.223091	0.123452	0.0515248	0.0897297
YCR087W	YCR087W
YCR088W	ABP1	148.555	0.61202	0.0483516	5.21352e-37	2.56699e-36	-0.0166493	0.0521826	0.747152	0.782639	0.612041	0.0712572	9.2042e-19	1.26212e-17
YCR089W	FIG2	12.3784	0.386014	0.107953	0.000264289	0.000395723	-0.358322	0.122307	0.0020198	0.00320853	0.676927	0.164763	2.36297e-06	1.00138e-05
YCR090C	YCR090C	67.8024	-0.702064	0.0553257	2.7653e-37	1.38343e-36	0.0623595	0.060514	0.295981	0.341462	-0.74341	0.0828449	1.29241e-20	2.03594e-19
YCR091W	KIN82	6.24772	-1.40116	0.180381	3.29278e-16	8.73619e-16	-1.69887	0.210287	7.769e-18	3.39005e-17	0.197375	0.219998	0.251113	0.342209
YCR092C	MSH3	24.1847	-0.597419	0.0922307	4.89709e-11	1.0456e-10	-0.631359	0.101987	1.66115e-10	4.70437e-10	0.038281	0.128026	0.746136	0.81278
YCR093W	CDC39	106.546	-0.212552	0.0469104	5.34087e-06	8.9009e-06	-0.158457	0.0509073	0.00165583	0.0026615	-0.0505657	0.0680992	0.44792	0.546781
YCR094W	CDC50	28.3854	-0.137908	0.0805673	0.0829842	0.0992174	0.158175	0.0881471	0.0644953	0.0837726	-0.273522	0.115236	0.0113388	0.0236191
YCR095C	OCA4	21.6999	-0.460092	0.0867548	7.80364e-08	1.4322e-07	-0.153269	0.0956785	0.0972722	0.122615	-0.268212	0.123787	0.0194617	0.0382371
YCR096C	HMRA2
YCR098C	GIT1	1.40225	0.177215	0.302026	0.495774	0.529913	0.258197	0.312071	0.27623	0.320422	-0.0630571	0.304845	0.727825	0.797924
YCR099C	YCR099C
YCR100C	EMA35
YCR101C	YCR101C
YCR102C	YCR102C	7.32376	-2.4163	0.202169	2.00397e-35	9.41173e-35	-0.124679	0.196448	0.473291	0.521793	-2.16542	0.299032	1.11149e-14	1.10793e-13
YCR104W	PAU3
YCR105W	ADH7	4.46603	-1.36092	0.182839	4.62173e-15	1.15993e-14	-0.841452	0.217463	1.2607e-05	2.47603e-05	-0.293901	0.231796	0.0952281	0.152141
YCR106W	RDS1	1.55385	3.67959	0.281906	1.00978e-40	5.53248e-40	3.12834	0.31258	6.55873e-26	4.23875e-25	0.243994	0.28939	1	1
YCR107W	AAD3	12.9564	-0.178597	0.113501	0.107172	0.126452	-0.278279	0.125493	0.018953	0.0267088	0.0928152	0.154717	0.498764	0.595121
YDL001W	RMD1	22.4553	0.492373	0.0854034	5.30081e-09	1.03303e-08	0.6026	0.0963998	1.25377e-10	3.57939e-10	-0.105873	0.121157	0.347281	0.445938
YDL002C	NHP10	29.373	-0.312842	0.0756174	2.92707e-05	4.68491e-05	-0.0765626	0.0829015	0.343348	0.389319	-0.213781	0.108504	0.0372212	0.067725
YDL003W	MCD1	59.3623	0.103121	0.062217	0.0947952	0.112576	-0.251015	0.0675268	0.000153098	0.000273767	0.338476	0.0899677	8.6252e-05	0.000282371
YDL004W	ATP16	145.505	-0.339646	0.0590342	7.12405e-09	1.3772e-08	0.661986	0.0633308	3.60664e-26	2.35098e-25	-0.98859	0.0882465	2.20113e-31	7.42074e-30
YDL005C	MED2	50.1292	0.791591	0.0526518	1.39027e-51	9.24458e-51	0.440449	0.0598039	8.91914e-14	3.11611e-13	0.331439	0.0782203	1.19942e-05	4.50889e-05
YDL006W	PTC1	46.9056	-0.45392	0.0593164	1.37926e-14	3.39081e-14	-0.737344	0.0666498	3.56673e-29	2.65897e-28	0.271115	0.0868563	0.00118514	0.0031008
YDL007W	RPT2	162.908	-0.131414	0.0394497	0.000830298	0.0011878	-0.396847	0.0433724	3.19238e-20	1.57384e-19	0.260474	0.0579891	4.87626e-06	1.95235e-05
YDL008W	APC11	19.6278	1.14738	0.0918283	7.96032e-37	3.8869e-36	1.55892	0.102643	7.5206e-54	1.40164e-52	-0.360895	0.130068	0.00257813	0.00627404
YDL009C	YDL009C
YDL010W	GRX6	34.8752	-0.0681635	0.0673796	0.307349	0.34112	0.198888	0.0748581	0.00659225	0.00984004	-0.252883	0.097979	0.00681178	0.0149667
YDL011C	YDL011C
YDL012C	YDL012C	135.835	0.0281827	0.0361324	0.434143	0.469442	0.321905	0.0404765	1.19859e-15	4.67168e-15	-0.289047	0.0538002	5.10871e-08	2.79921e-07
YDL013W	SLX5	17.9489	0.0785549	0.0843183	0.344966	0.379843	-0.00491183	0.0943545	0.957128	0.963683	0.0747123	0.12091	0.507272	0.603794
YDL014W	NOP1	661.639	-0.0234153	0.0241047	0.330748	0.365252	0.10382	0.0257326	5.22092e-05	9.75099e-05	-0.12637	0.0351265	0.0002974	0.000889344
YDL015C	TSC13	161.748	1.08722	0.037133	2.36278e-189	1.47132e-187	0.883008	0.0407492	4.18662e-105	2.60703e-103	0.19762	0.0544427	0.000228539	0.000693212
YDL016C	YDL016C
YDL017W	CDC7	17.8105	-0.0217642	0.0943204	0.814553	0.833126	-0.349235	0.104687	0.00051955	0.00087915	0.296433	0.133843	0.0155659	0.0313629
YDL018C	ERP3	41.7761	-0.30815	0.0654459	2.09341e-06	3.56169e-06	-0.163744	0.0718894	0.0200789	0.0281604	-0.131405	0.0943296	0.146107	0.218644
YDL019C	OSH2	38.1649	-0.0117511	0.0675154	0.860608	0.875158	-0.306863	0.074712	2.70683e-05	5.18165e-05	0.279786	0.0979014	0.00270895	0.00655324
YDL020C	RPN4	85.6457	-0.593674	0.0670369	4.42786e-19	1.29699e-18	-0.634857	0.072995	9.49404e-19	4.32833e-18	0.0427835	0.0953152	0.639035	0.722892
YDL021W	GPM2	9.15878	-1.31984	0.177007	4.81474e-15	1.20551e-14	-1.07923	0.199967	3.3625e-09	8.84579e-09	-0.134863	0.212873	0.423236	0.521702
YDL022W	GPD1	100.823	0.0395795	0.0777284	0.606467	0.63767	0.537725	0.0834484	4.45232e-11	1.31654e-10	-0.466426	0.111665	8.30119e-06	3.19551e-05
YDL023C	YDL023C
YDL024C	DIA3	0.510353	0.805795	0.436151	0.014675	0.0189821	0.317774	0.393397	0.225525	0.266333	0.126353	0.357217	1	1
YDL025C	RTK1	18.3577	0.786873	0.0955154	5.58641e-17	1.52417e-16	0.182308	0.10338	0.0664247	0.0860675	0.533008	0.138555	2.05109e-05	7.41558e-05
YDL026W	YDL026W
YDL027C	MRX9	20.2077	0.847156	0.0930917	2.40261e-20	7.27519e-20	0.738811	0.105181	3.96661e-13	1.3305e-12	0.0835103	0.130128	0.484365	0.580821
YDL028C	MPS1	28.5913	-0.030125	0.075687	0.687379	0.713531	-0.18073	0.0836525	0.0264033	0.036489	0.141827	0.10854	0.165663	0.242695
YDL029W	ARP2	114.049	0.696769	0.0428478	7.71666e-60	6.01536e-59	0.603551	0.0475346	1.94277e-37	2.0045e-36	0.0879168	0.06294	0.154503	0.228879
YDL030W	PRP9	19.7091	0.498464	0.0790482	1.84808e-10	3.84206e-10	0.663619	0.091092	7.97866e-14	2.79861e-13	-0.156027	0.114355	0.145763	0.218314
YDL031W	DBP10	114.675	0.193459	0.0421417	4.07607e-06	6.82741e-06	0.234803	0.0463222	3.14696e-07	7.15808e-07	-0.0417913	0.0617307	0.490945	0.587248
YDL032W	YDL032W
YDL033C	SLM3	21.5067	-1.4008	0.0854764	1.00373e-61	8.03741e-61	-1.12035	0.0960482	8.84506e-33	7.71284e-32	-0.240156	0.120849	0.0327552	0.0607476
YDL034W	YDL034W
YDL035C	GPR1	29.3611	1.24015	0.07896	1.01276e-56	7.42458e-56	0.952092	0.0880117	2.27437e-28	1.63563e-27	0.252137	0.112302	0.0168805	0.0336655
YDL036C	PUS9	25.4513	-0.406381	0.0827188	6.68694e-07	1.16773e-06	-0.0139084	0.09007	0.873637	0.895114	-0.355156	0.118997	0.001366	0.00353384
YDL037C	BSC1	62.4888	-6.80616	0.201204	1.487e-252	1.74905e-250	-7.51991	0.233536	3.2783e-229	9.13264e-227	0.44291	0.263321	0.0160021	0.0321317
YDL039C	PRM7
YDL040C	NAT1	125.928	0.386798	0.0415646	1.02867e-20	3.16372e-20	-0.343761	0.0456043	2.99521e-14	1.07701e-13	0.720336	0.0618813	9.98917e-33	3.5485e-31
YDL041W	YDL041W
YDL042C	SIR2	31.3415	0.653131	0.0708537	1.40188e-20	4.27922e-20	0.0942388	0.077103	0.211227	0.250847	0.521257	0.103938	1.04713e-07	5.42848e-07
YDL043C	PRP11	13.9027	-0.267652	0.109319	0.0123671	0.0160754	0.331763	0.119634	0.00352032	0.00543555	-0.535011	0.158448	0.000126934	0.000403764
YDL044C	MTF2	14.2125	-0.539029	0.100568	4.93104e-08	9.14506e-08	-0.0434005	0.109213	0.678462	0.717924	-0.431174	0.1443	0.000884419	0.00238473
YDL045C	FAD1	22.8104	0.233205	0.0815131	0.00376852	0.00512112	0.159303	0.0905654	0.0695295	0.0895861	0.0616583	0.116204	0.571658	0.663549
YDL046W	NPC2	98.8759	0.672319	0.0506758	1.59381e-40	8.67016e-40	0.813094	0.0557149	4.25179e-49	6.92453e-48	-0.13702	0.0735867	0.0564902	0.0970473
YDL047W	SIT4	45.8432	0.158053	0.0627987	0.0111755	0.0145658	-0.091826	0.068149	0.170138	0.20579	0.237115	0.0906057	0.00650719	0.0144051
YDL048C	STP4	11.5084	-0.329505	0.127475	0.00783557	0.0103348	-0.127483	0.134315	0.31221	0.357844	-0.154452	0.168651	0.292314	0.388455
YDL049C	KNH1	6.24176	0.802487	0.164158	3.01348e-07	5.36867e-07	1.00388	0.186393	4.65251e-09	1.2107e-08	-0.153925	0.204366	0.351308	0.450562
YDL050C	YDL050C
YDL051W	LHP1	333.099	-0.0507943	0.034108	0.135458	0.157751	-0.0191019	0.0364765	0.598616	0.643607	-0.0310217	0.049562	0.526689	0.622408
YDL052C	SLC1	76.0251	-0.00942353	0.049908	0.849488	0.865346	-0.23767	0.055199	1.30075e-05	2.55185e-05	0.22168	0.0731847	0.00192257	0.00481599
YDL053C	PBP4	60.1727	-0.560097	0.0568012	3.54642e-23	1.17393e-22	-0.38666	0.0627721	4.14222e-10	1.1503e-09	-0.160548	0.0824903	0.0442894	0.0790104
YDL054C	MCH1	12.2383	0.718321	0.107542	9.26722e-12	2.02943e-11	0.394844	0.120323	0.000562616	0.000948083	0.258558	0.149554	0.0534117	0.0926305
YDL055C	PSA1	1344.46	0.528729	0.029638	2.14605e-71	2.06528e-70	-0.0497519	0.0311769	0.109174	0.136481	0.572716	0.0430092	2.89993e-41	1.61572e-39
YDL056W	MBP1	40.7098	1.06281	0.0818642	2.0379e-39	1.07651e-38	0.961069	0.0898885	8.62928e-28	6.0257e-27	0.0847435	0.114333	0.430937	0.528977
YDL057W	YDL057W	10.2645	0.430801	0.115314	0.000132577	0.000202929	0.38191	0.130009	0.00185426	0.0029571	0.02619	0.157097	0.850609	0.893714
YDL058W	USO1	54.7686	0.438136	0.0524069	4.49749e-17	1.23088e-16	-0.501801	0.0592811	1.10609e-17	4.78703e-17	0.927543	0.0803068	3.50724e-33	1.28915e-31
YDL059C	RAD59	14.2894	0.591968	0.116831	2.12693e-07	3.81881e-07	0.379674	0.128702	0.00179193	0.00286373	0.15979	0.157948	0.25476	0.346288
YDL060W	TSR1	208.944	-0.190048	0.0314107	1.33671e-09	2.68203e-09	-0.178727	0.0344069	1.78417e-07	4.13287e-07	-0.010318	0.0462293	0.821584	0.870076
YDL061C	RPS29B	1900.83	-0.178144	0.0328969	5.70971e-08	1.05301e-07	0.109938	0.0343425	0.00129714	0.00210413	-0.284116	0.0472803	1.26824e-09	8.17634e-09
YDL062W	YDL062W
YDL063C	SYO1	76.9461	-0.345988	0.0485482	8.34146e-13	1.90801e-12	0.139457	0.0533057	0.00813487	0.0119938	-0.471799	0.0716631	1.37094e-11	1.07388e-10
YDL064W	UBC9	129.843	-0.0406335	0.0391686	0.297994	0.331292	0.0337335	0.0430005	0.42945	0.47804	-0.0728331	0.0575856	0.19897	0.281967
YDL065C	PEX19	50.8571	0.611008	0.058098	3.71471e-26	1.36237e-25	0.581781	0.0651447	1.43034e-19	6.80213e-19	0.0233567	0.0846709	0.775497	0.833951
YDL066W	IDP1	69.8476	-0.491182	0.075231	4.33036e-11	9.25711e-11	-0.333642	0.0802454	2.04691e-05	3.95556e-05	-0.138896	0.105429	0.165002	0.241793
YDL067C	COX9	128.51	-0.961554	0.0811457	4.00549e-33	1.76529e-32	0.268601	0.0849872	0.00115313	0.0018836	-1.2196	0.121598	5.53622e-26	1.25227e-24
YDL068W	YDL068W
YDL069C	CBS1	10.8347	-0.298741	0.126461	0.015112	0.0195045	-0.360635	0.140092	0.00591257	0.00888817	0.0630417	0.168487	0.666931	0.745998
YDL070W	BDF2	79.1617	1.05354	0.066344	1.19885e-57	8.93733e-57	-0.115829	0.0696384	0.0900759	0.114224	1.15672	0.0989839	4.71182e-34	1.79422e-32
YDL071C	YDL071C
YDL072C	YET3	170.491	-0.826701	0.0378829	4.06712e-106	7.60682e-105	-1.10306	0.0424271	2.48769e-150	3.7621e-148	0.270298	0.0561855	1.02597e-06	4.5711e-06
YDL073W	AHK1	37.4918	0.405263	0.0652579	3.97406e-10	8.16881e-10	0.0382304	0.0720099	0.588285	0.633915	0.3432	0.0954176	0.000160073	0.00049898
YDL074C	BRE1	80.8443	0.700273	0.0461871	2.61762e-52	1.76273e-51	0.33265	0.0508858	4.02321e-11	1.19232e-10	0.352956	0.0678514	9.76096e-08	5.07512e-07
YDL075W	RPL31A	4312.18	-0.194178	0.0284315	7.85397e-12	1.72566e-11	-0.0288118	0.029623	0.329085	0.37443	-0.163202	0.0408534	5.69988e-05	0.00019327
YDL076C	RXT3	31.2487	1.04105	0.074814	7.32732e-45	4.32369e-44	0.815042	0.0836013	2.54037e-23	1.45996e-22	0.198462	0.1069	0.0497723	0.0870604
YDL077C	VAM6	17.739	1.02325	0.0971789	9.51912e-27	3.56579e-26	0.885385	0.109215	5.33915e-17	2.24287e-16	0.107749	0.134413	0.380894	0.479788
YDL078C	MDH3	88.6947	1.97905	0.0591513	1.46355e-247	1.58093e-245	1.96331	0.0656618	1.47113e-198	3.53941e-196	0.0132819	0.0852899	0.871788	0.910133
YDL079C	MRK1	5.94557	-0.595823	0.172163	0.000272034	0.000406515	-1.01466	0.197886	1.81544e-08	4.51982e-08	0.301746	0.220294	0.0784677	0.129551
YDL080C	THI3	14.9904	-0.157091	0.0972928	0.100235	0.118796	-0.517146	0.109994	1.02357e-06	2.21766e-06	0.323402	0.138803	0.0101728	0.0213925
YDL081C	RPP1A	1546.79	-0.945048	0.0413121	1.5934e-116	3.51412e-115	-0.319397	0.0431254	8.58851e-14	3.00853e-13	-0.611334	0.0596101	1.56525e-25	3.45203e-24
YDL082W	RPL13A	1453.28	-0.35078	0.0285664	9.46746e-35	4.3575e-34	-0.0721242	0.0299385	0.0156188	0.0221933	-0.274913	0.0412013	1.77936e-11	1.38502e-10
YDL083C	RPS16B	1707.75	-0.124649	0.0343786	0.000277712	0.000414649	0.0229403	0.0358719	0.52041	0.569	-0.145106	0.0493229	0.00293828	0.00705321
YDL084W	SUB2	308.756	0.173904	0.0306025	1.24048e-08	2.36948e-08	-0.253992	0.0332021	1.52547e-14	5.60715e-14	0.423234	0.0449732	1.91668e-21	3.21044e-20
YDL085W	NDE2	3.15765	-2.07917	0.220974	2.76147e-23	9.19852e-23	-2.58436	0.270946	2.49776e-24	1.49894e-23	0.275619	0.260024	0.105884	0.166552
YDL086W	YDL086W	152.717	-0.699714	0.0432912	3.80225e-59	2.91671e-58	-0.0654271	0.0468495	0.158961	0.193243	-0.619755	0.0638707	3.98005e-23	7.6052e-22
YDL087C	LUC7	3.21641	1.14442	0.214595	9.26076e-09	1.77727e-08	1.09723	0.244188	3.21166e-07	7.28646e-07	0.00342311	0.238579	0.981749	0.993955
YDL088C	ASM4	41.0302	0.700133	0.062126	7.62833e-30	3.11069e-29	0.557948	0.06866	1.60957e-16	6.60424e-16	0.128448	0.0896012	0.13605	0.205119
YDL089W	NUR1	20.1651	1.55185	0.0941152	1.15067e-62	9.41347e-62	1.34555	0.106162	2.10881e-38	2.24135e-37	0.170016	0.13101	0.157991	0.233458
YDL090C	RAM1	23.2012	0.0815422	0.0859724	0.336084	0.370806	0.0527827	0.0944825	0.563876	0.611097	0.0238678	0.121765	0.833426	0.881187
YDL091C	UBX3	19.5228	-0.40608	0.0972501	2.20044e-05	3.54333e-05	-0.680117	0.10884	9.54288e-11	2.75111e-10	0.24619	0.136369	0.0476629	0.0840653
YDL092W	SRP14	113.758	-0.606469	0.039242	3.66383e-54	2.56178e-53	-0.292972	0.0435147	1.16416e-11	3.56384e-11	-0.303929	0.0580035	1.04507e-07	5.4231e-07
YDL093W	PMT5	26.9445	0.390131	0.079675	7.43217e-07	1.2936e-06	-0.154397	0.0868222	0.0671665	0.0869436	0.507342	0.116447	2.7764e-06	1.16538e-05
YDL094C	YDL094C
YDL095W	PMT1	155.718	0.129857	0.0377364	0.000556648	0.000806994	-0.315608	0.0412312	1.29265e-14	4.78125e-14	0.438249	0.0555642	1.07285e-15	1.16365e-14
YDL096C	OPI6
YDL097C	RPN6	197.035	0.158756	0.037155	1.82297e-05	2.94895e-05	0.190148	0.040653	2.47834e-06	5.20343e-06	-0.0318119	0.0544836	0.553847	0.646277
YDL098C	SNU23	23.0857	0.107734	0.0833647	0.190253	0.217544	0.258047	0.0930377	0.00414237	0.00633138	-0.140873	0.118843	0.204223	0.287947
YDL099W	BUG1	56.6743	0.0162878	0.0502466	0.744562	0.76822	-0.137773	0.0567135	0.0138586	0.0198092	0.149542	0.0744881	0.0391745	0.0708406
YDL100C	GET3	269.933	0.322836	0.0330705	1.36642e-22	4.42894e-22	0.237829	0.0361435	3.67954e-11	1.0923e-10	0.0823533	0.0485616	0.0864695	0.140696
YDL101C	DUN1	29.3588	-0.423803	0.0769173	2.6162e-08	4.90178e-08	-0.180567	0.0843662	0.0277792	0.0382606	-0.216948	0.109931	0.0362561	0.0663338
YDL102W	POL3	31.4308	0.33412	0.0682234	7.92952e-07	1.37745e-06	-0.00887298	0.0752679	0.904173	0.91999	0.3198	0.0994523	0.000722445	0.0019813
YDL103C	QRI1	75.6364	-0.639916	0.0487655	1.17993e-39	6.28304e-39	-0.899435	0.0547194	1.01776e-61	2.39423e-60	0.251178	0.0718496	0.00032663	0.000970719
YDL104C	QRI7	13.551	0.102509	0.0912141	0.253577	0.284181	0.134753	0.102082	0.170074	0.20576	-0.0330769	0.129319	0.781413	0.838926
YDL105W	NSE4	9.71331	-0.657917	0.112219	2.05401e-09	4.0887e-09	-0.371624	0.126877	0.00195731	0.003113	-0.222109	0.15547	0.105981	0.166654
YDL106C	PHO2	14.9479	-0.332627	0.0964573	0.000456717	0.000670756	-0.256456	0.107421	0.0126892	0.0182164	-0.0572304	0.134753	0.643136	0.72598
YDL107W	MSS2	10.4936	-0.22011	0.107463	0.0364338	0.0452579	0.0956133	0.118767	0.397396	0.445356	-0.272127	0.15113	0.0436925	0.0780508
YDL108W	KIN28	26.137	-0.0494466	0.0677626	0.461534	0.496525	0.0465397	0.0769641	0.53644	0.584836	-0.0901557	0.0995037	0.341987	0.440315
YDL109C	YDL109C	0.251355	0.729873	0.612628	0.0481981	0.0589856	0.131314	0.467232	0.604113	0.648857	0.141712	0.429845	0.206301	0.290336
YDL110C	TMA17	66.6101	-1.10459	0.0724904	2.29869e-53	1.58424e-52	-0.539213	0.0779697	1.77943e-12	5.71858e-12	-0.520134	0.104644	1.42768e-07	7.24515e-07
YDL111C	RRP42	79.7983	-0.00132648	0.049515	0.978521	0.981488	0.569665	0.0547058	7.62623e-26	4.8928e-25	-0.55636	0.0734464	6.5323e-15	6.62365e-14
YDL112W	TRM3	92.7988	0.997754	0.0478607	2.68423e-97	4.35635e-96	0.719464	0.0524303	1.51409e-43	2.00854e-42	0.2647	0.0697029	9.90365e-05	0.000320808
YDL113C	ATG20	12.785	0.0768414	0.0952175	0.41178	0.447088	-0.104842	0.108918	0.315017	0.360828	0.161933	0.136758	0.192834	0.274816
YDL114W	YDL114W	0.925306	-0.440649	0.40783	0.15908	0.183644	0.185136	0.376568	0.465849	0.514803	-0.270366	0.406247	0.131342	0.199539
YDL115C	IWR1	12.5874	-0.193879	0.0989909	0.0460659	0.0565199	-0.387316	0.113121	0.000343687	0.000593132	0.176268	0.139921	0.165718	0.242708
YDL116W	NUP84	58.9823	-0.40241	0.0509804	2.22559e-15	5.66076e-15	-0.506891	0.0574264	4.58343e-19	2.13182e-18	0.103021	0.075082	0.158518	0.234107
YDL117W	CYK3	52.855	-0.305427	0.0501705	9.66924e-10	1.95565e-09	-0.550114	0.0567781	1.26262e-22	7.04219e-22	0.237585	0.0743066	0.00101189	0.00269685
YDL118W	YDL118W
YDL119C	HEM25	12.3493	0.232964	0.106078	0.0249734	0.031555	0.416432	0.119319	0.000249365	0.000437049	-0.165785	0.147183	0.210707	0.295124
YDL120W	YFH1	74.7438	0.449347	0.048217	8.28235e-21	2.55618e-20	0.509897	0.0537407	9.95234e-22	5.35343e-21	-0.0609032	0.0707433	0.377982	0.476915
YDL121C	EXP1	123.717	0.0626896	0.0404429	0.119835	0.140515	0.178514	0.0446927	5.63439e-05	0.000104825	-0.114022	0.059562	0.0516771	0.0899168
YDL122W	UBP1	137.13	0.339283	0.0379637	3.27593e-19	9.63305e-19	0.528902	0.0415791	1.83856e-37	1.9044e-36	-0.186659	0.055657	0.000670375	0.00185172
YDL123W	SNA4	2.72895	0.470802	0.19679	0.0106378	0.0139027	1.13885	0.24639	1.52342e-07	3.55531e-07	-0.451655	0.270553	0.018613	0.0367059
YDL124W	YDL124W	69.6523	0.94659	0.077429	4.44212e-35	2.06247e-34	0.641791	0.0849495	1.1323e-14	4.19402e-14	0.269372	0.109963	0.00934355	0.0198536
YDL125C	HNT1	298.732	0.783547	0.0310971	1.41912e-140	4.49785e-139	0.697727	0.033883	7.1621e-95	3.51009e-93	0.0832348	0.0455788	0.0653868	0.110086
YDL126C	CDC48	529.807	-0.398389	0.0348002	1.84113e-30	7.57784e-30	-0.884384	0.0372611	1.64798e-125	1.50393e-123	0.478533	0.0507193	1.10837e-21	1.89246e-20
YDL127W	PCL2	18.7855	0.123982	0.0919194	0.170475	0.195901	-0.520302	0.102672	1.59323e-07	3.71168e-07	0.595645	0.136545	1.37184e-06	6.00593e-06
YDL128W	VCX1	50.4296	0.0166046	0.0649517	0.796587	0.817436	-0.248105	0.0709295	0.000358393	0.000616501	0.252032	0.0936873	0.00491124	0.0111952
YDL129W	YDL129W	4.52718	-0.589266	0.190984	0.00102829	0.00145528	-0.529578	0.205268	0.00348239	0.00538011	-0.0142082	0.223753	0.934208	0.958474
YDL130W	RPP1B	2370.5	0.0630245	0.0389373	0.104408	0.123438	0.557737	0.0407215	3.94609e-43	5.1572e-42	-0.486355	0.0560699	1.2552e-18	1.7079e-17
YDL131W	LYS21	138.339	1.66046	0.0573063	2.50348e-186	1.5231e-184	0.188095	0.0597102	0.00139205	0.0022498	1.46154	0.0834631	4.19635e-70	5.6952e-68
YDL132W	CDC53	135.767	0.739482	0.038952	8.50965e-81	9.70724e-80	0.268508	0.0431932	3.74119e-10	1.04222e-09	0.458771	0.0578121	5.90389e-16	6.62061e-15
YDL133W	SRF1	19.4457	-0.427598	0.0865604	5.64127e-07	9.87736e-07	-0.0777334	0.0969799	0.406785	0.455012	-0.308908	0.125379	0.00784979	0.0170004
YDL134C	PPH21	105.971	0.194921	0.0366698	9.8022e-08	1.79092e-07	0.141162	0.0411114	0.000544992	0.000919848	0.0515061	0.0545283	0.338053	0.436312
YDL135C	RDI1	78.0682	0.0864104	0.0475009	0.0675742	0.081511	0.190863	0.0525776	0.000240847	0.000422821	-0.102461	0.0696808	0.133027	0.20152
YDL136W	RPL35B
YDL137W	ARF2	325.704	0.333501	0.042539	3.71334e-15	9.35049e-15	0.179145	0.0454612	7.04837e-05	0.00012999	0.148468	0.0614634	0.0139067	0.0283216
YDL138W	RGT2	26.7008	0.367722	0.0724235	3.00595e-07	5.35888e-07	-0.290428	0.0812387	0.000245084	0.000429973	0.62632	0.108763	7.59536e-10	5.01275e-09
YDL139C	SCM3	10.2636	-0.230269	0.10124	0.0204598	0.0260354	-0.141671	0.114813	0.195576	0.233939	-0.0686688	0.142719	0.595011	0.685246
YDL140C	RPO21	278.623	0.540203	0.0325582	4.80148e-62	3.88597e-61	0.143282	0.0349717	3.82275e-05	7.20834e-05	0.389973	0.0475664	1.04824e-16	1.23571e-15
YDL141W	BPL1	36.6699	0.472445	0.0701676	1.12385e-11	2.45301e-11	-0.261334	0.0773426	0.000541265	0.000913848	0.70425	0.105252	1.0833e-12	9.43078e-12
YDL142C	CRD1	16.2319	0.27489	0.0961231	0.00363887	0.00495002	0.236371	0.107324	0.0214889	0.0300267	0.0251966	0.134572	0.838489	0.884574
YDL143W	CCT4	296.463	0.681538	0.0294267	4.94894e-119	1.13397e-117	0.631543	0.0322371	5.35315e-86	2.06819e-84	0.0482032	0.0433007	0.261644	0.354008
YDL144C	YDL144C	46.7762	0.565432	0.0605314	5.41677e-21	1.68356e-20	0.359972	0.0678089	6.65443e-08	1.58729e-07	0.188771	0.088325	0.0266479	0.0506427
YDL145C	COP1	191.047	0.554022	0.0370536	8.85289e-51	5.79213e-50	0.0536851	0.04007	0.177584	0.214209	0.49067	0.0544364	5.11625e-20	7.73724e-19
YDL146W	LDB17	13.0191	-0.0528771	0.105032	0.607515	0.638515	-0.168041	0.115503	0.126673	0.156435	0.104363	0.145358	0.425412	0.523774
YDL147W	RPN5	159.405	-0.107027	0.035039	0.00219298	0.00302987	-0.00538524	0.0388741	0.889179	0.908226	-0.0995747	0.051911	0.0522148	0.0907331
YDL148C	NOP14	123.487	0.204655	0.0418165	9.03996e-07	1.56113e-06	-0.211934	0.0457312	2.9391e-06	6.13432e-06	0.407955	0.0615033	1.3173e-11	1.03603e-10
YDL149W	ATG9	22.8633	-0.140927	0.0861501	0.0970203	0.115089	-0.28166	0.0958157	0.002338	0.00369184	0.131979	0.122056	0.244363	0.334908
YDL150W	RPC53	137.793	0.490523	0.0391806	3.85709e-36	1.85765e-35	0.553019	0.0430753	3.74528e-38	3.96475e-37	-0.0625931	0.0574449	0.268443	0.361636
YDL151C	BUD30
YDL152W	YDL152W
YDL153C	SAS10	74.8952	-0.392494	0.0492456	1.21655e-15	3.12279e-15	-0.412629	0.054488	1.9643e-14	7.15064e-14	0.0220617	0.0719272	0.753563	0.818344
YDL154W	MSH5	5.00986	-0.0398606	0.171578	0.807154	0.826677	0.20159	0.18655	0.226586	0.267527	-0.182157	0.217933	0.287654	0.383417
YDL155W	CLB3	33.3153	-0.483866	0.0693782	2.03981e-12	4.58655e-12	-0.507304	0.0777863	2.91067e-11	8.66976e-11	0.027245	0.0999907	0.775217	0.833834
YDL156W	CMR1	2.81733	0.728683	0.222725	0.000375852	0.000557095	0.36318	0.232593	0.0663049	0.0859367	0.184769	0.253428	0.308637	0.406461
YDL157C	YDL157C	133.831	0.233281	0.0395894	3.4121e-09	6.7014e-09	0.0828463	0.0435304	0.0551711	0.0725701	0.145834	0.0582259	0.0109705	0.0228995
YDL158C	YDL158C
YDL159W	STE7	25.0186	-0.053569	0.0798317	0.496974	0.530975	-0.270837	0.0888072	0.00166837	0.0026792	0.202614	0.114386	0.0586085	0.0999404
YDL160C	DHH1	5.49008	-1.77205	0.172277	1.02849e-26	3.8472e-26	-1.62741	0.193877	6.55488e-19	3.02221e-18	-0.0817498	0.206829	0.622821	0.709708
YDL161W	ENT1	55.4615	-0.38816	0.0539205	4.6841e-13	1.0855e-12	-0.70298	0.0600708	2.67553e-32	2.25863e-31	0.303424	0.0790691	7.5405e-05	0.000249784
YDL162C	YDL162C
YDL163W	YDL163W
YDL164C	CDC9	36.062	0.319491	0.0638235	4.6163e-07	8.12032e-07	-0.120847	0.0702803	0.0796128	0.101638	0.418285	0.0936267	2.94029e-06	1.22833e-05
YDL165W	CDC36	38.2299	0.547866	0.0620955	6.56886e-19	1.90934e-18	0.829968	0.070656	9.47656e-33	8.2094e-32	-0.268216	0.091214	0.00223405	0.00551274
YDL166C	FAP7	148.459	-0.873648	0.0358347	6.92753e-132	1.89987e-130	-0.606278	0.0400412	2.71859e-52	4.8778e-51	-0.259615	0.0531855	7.54924e-07	3.43283e-06
YDL167C	NRP1	44.5016	0.379513	0.0588568	8.81405e-11	1.85498e-10	0.184419	0.0647202	0.00375397	0.00577609	0.181401	0.0854059	0.0277995	0.0525886
YDL168W	SFA1	99.3161	0.152065	0.0422384	0.00030154	0.000449212	0.281817	0.0470917	1.55337e-09	4.18636e-09	-0.127717	0.0623562	0.037086	0.0675191
YDL169C	UGX2	3.71943	-0.0849499	0.190203	0.635206	0.664981	0.246466	0.212197	0.181352	0.218357	-0.236332	0.240957	0.18632	0.26739
YDL170W	UGA3	8.22399	0.853044	0.152448	5.63051e-09	1.09406e-08	0.59339	0.16712	0.000113963	0.000206365	0.16714	0.193239	0.295635	0.392081
YDL171C	GLT1	93.0663	0.0942846	0.0645262	0.140599	0.16345	-0.0883774	0.0675174	0.182815	0.219918	0.173397	0.0910971	0.0473951	0.0836208
YDL172C	YDL172C
YDL173W	PAR32	48.2889	0.50684	0.0594739	1.00113e-17	2.79778e-17	0.437154	0.0665814	2.61612e-11	7.82324e-11	0.0613031	0.086598	0.462722	0.56084
YDL174C	DLD1	57.935	-0.143558	0.0753626	0.0540415	0.0658021	0.192661	0.0805637	0.0141585	0.0202215	-0.314561	0.107135	0.00188503	0.0047309
YDL175C	AIR2	19.197	-0.300647	0.0851315	0.000347004	0.000515202	-0.0158761	0.0953328	0.863371	0.885796	-0.253691	0.122979	0.0260642	0.049643
YDL176W	YDL176W	13.8482	0.265733	0.0967693	0.00522033	0.00698994	0.27207	0.110015	0.00970204	0.0141741	-0.0145998	0.136396	0.906608	0.937759
YDL177C	YDL177C	30.2468	-0.186932	0.0664056	0.00451352	0.00607735	-0.117487	0.0749318	0.109091	0.136408	-0.0617963	0.0970133	0.505502	0.602211
YDL178W	DLD2	67.9123	-0.372478	0.0510729	2.38335e-13	5.57448e-13	-0.123529	0.0559714	0.0254309	0.0351911	-0.237011	0.0745782	0.00109365	0.00288971
YDL179W	PCL9	17.8866	-0.0655392	0.0995976	0.502752	0.536397	-0.253443	0.108823	0.0149391	0.0212733	0.170011	0.138263	0.176787	0.256015
YDL180W	YDL180W	19.216	0.112616	0.0852417	0.180311	0.206622	0.0986938	0.0949201	0.282386	0.326958	0.00912095	0.121462	0.935669	0.9596
YDL181W	INH1	67.0412	-2.49199	0.132948	6.42777e-81	7.36411e-80	-0.733012	0.137762	1.90879e-08	4.74341e-08	-1.67126	0.193029	2.43403e-19	3.48197e-18
YDL182W	LYS20	166.262	3.02039	0.0902122	4.09325e-248	4.60969e-246	1.80776	0.0946473	2.82726e-83	1.03922e-81	1.1572	0.135069	3.40406e-20	5.20743e-19
YDL183C	YDL183C	10.6447	-0.496194	0.109065	3.43652e-06	5.78179e-06	-0.385032	0.122342	0.000919684	0.00151553	-0.0798617	0.149716	0.552146	0.645287
YDL184C	RPL41A
YDL185W	VMA1
YDL186W	YDL186W	0.810182	-0.0826844	0.343151	0.770099	0.793022	-0.341913	0.355428	0.177999	0.214662	0.138637	0.335219	0.328047	0.426936
YDL187C	YDL187C
YDL188C	PPH22	45.546	0.2284	0.0665848	0.000541197	0.000785886	0.0103035	0.0718574	0.883782	0.903585	0.203416	0.0954725	0.0258825	0.0493324
YDL189W	RBS1	48.1805	0.521693	0.0537987	1.92844e-22	6.21254e-22	0.240287	0.0604545	5.47612e-05	0.000101988	0.265134	0.0793704	0.000571336	0.00160344
YDL190C	UFD2	63.9099	0.110694	0.0522109	0.0329781	0.0411584	0.177902	0.058023	0.0018806	0.00299729	-0.06637	0.0764764	0.373433	0.472414
YDL191W	RPL35A	1568.87	-0.488268	0.031265	3.69986e-55	2.63927e-54	-0.326951	0.0328088	1.40769e-23	8.18783e-23	-0.157859	0.044978	0.000397017	0.00115335
YDL192W	ARF1	925.229	-0.232531	0.0290044	9.73021e-16	2.51967e-15	0.0666784	0.0306224	0.0288474	0.0396596	-0.295768	0.0419982	1.28534e-12	1.11165e-11
YDL193W	NUS1	47.1404	0.590171	0.059777	2.94027e-23	9.76338e-23	0.232103	0.0664808	0.000379131	0.000650272	0.334901	0.087613	7.02451e-05	0.000235024
YDL194W	SNF3	9.8966	-0.199918	0.116098	0.0776148	0.093071	-0.406598	0.131369	0.00103575	0.00169887	0.182291	0.159711	0.195284	0.277935
YDL195W	SEC31	146.322	0.642015	0.0410724	2.13622e-55	1.53211e-54	0.265373	0.0443414	1.60419e-09	4.3167e-09	0.365352	0.059888	4.82079e-10	3.26297e-09
YDL196W	YDL196W
YDL197C	ASF2	21.7852	0.70529	0.07965	3.38372e-19	9.94449e-19	0.434696	0.0893953	5.8102e-07	1.2927e-06	0.236233	0.11427	0.0274149	0.0519353
YDL198C	GGC1	84.7272	-0.63114	0.06859	1.72426e-20	5.24513e-20	0.052497	0.0725338	0.460377	0.50936	-0.652039	0.100451	7.33978e-12	5.93122e-11
YDL199C	YDL199C	4.02819	0.449153	0.19679	0.0148134	0.0191471	0.0761876	0.203204	0.669635	0.710154	0.232916	0.240207	0.191727	0.273534
YDL200C	MGT1	17.6299	0.977182	0.102184	2.00695e-22	6.4537e-22	0.921571	0.116729	2.59241e-16	1.0547e-15	0.0359395	0.140996	0.778184	0.836331
YDL201W	TRM8	70.951	0.210947	0.0458715	3.87419e-06	6.50162e-06	0.269167	0.0511347	1.03542e-07	2.45103e-07	-0.0583402	0.0675067	0.377658	0.47662
YDL202W	MRPL11	42.6138	-0.435812	0.0638859	6.46705e-12	1.4227e-11	0.353981	0.0698996	2.50347e-07	5.7363e-07	-0.766831	0.0956956	3.47453e-17	4.23749e-16
YDL203C	ACK1	26.4634	1.0816	0.0797415	8.18069e-43	4.65595e-42	0.600386	0.0885746	3.79133e-12	1.19663e-11	0.428884	0.115359	6.64725e-05	0.000223106
YDL204W	RTN2	5.93553	-0.171178	0.152726	0.243186	0.273403	-0.585667	0.17565	0.000258121	0.000451797	0.32834	0.206061	0.0486683	0.0854454
YDL205C	HEM3	37.9355	0.0342439	0.0782864	0.658082	0.68581	0.135218	0.0838787	0.0976964	0.123091	-0.0952396	0.110235	0.359446	0.458218
YDL206W	YDL206W	47.5162	0.357624	0.0817172	9.55811e-06	1.57018e-05	0.56289	0.0881794	6.10225e-11	1.78844e-10	-0.191276	0.114414	0.0754339	0.125085
YDL207W	GLE1	24.0757	0.214046	0.0681087	0.00151839	0.00212334	0.0330395	0.0766037	0.659343	0.70079	0.166849	0.0995684	0.078356	0.129444
YDL208W	NHP2	514.405	-0.325672	0.0272135	4.39111e-33	1.93201e-32	0.119638	0.0291385	3.78527e-05	7.14785e-05	-0.441239	0.03978	5.76161e-29	1.59666e-27
YDL209C	CWC2	24.5413	-0.769544	0.0746735	2.25066e-25	8.06004e-25	-0.513258	0.0846749	5.52486e-10	1.52705e-09	-0.225872	0.108106	0.0269983	0.0512378
YDL210W	UGA4	3.25995	0.537947	0.201735	0.00428259	0.00577817	0.344804	0.225768	0.0746407	0.0956826	0.0870366	0.240167	0.622031	0.708959
YDL211C	YDL211C	17.5856	-0.672877	0.0968829	1.65141e-12	3.71955e-12	-0.486844	0.106778	2.22049e-06	4.68062e-06	-0.150204	0.134142	0.221802	0.30846
YDL212W	SHR3	191.543	-0.0859553	0.0345679	0.0126647	0.016438	0.000578527	0.037787	0.987717	0.989961	-0.0848958	0.0508135	0.0906947	0.146133
YDL213C	NOP6	161.796	0.0507803	0.037088	0.169695	0.195091	0.196186	0.0406003	1.14031e-06	2.46254e-06	-0.143303	0.0544509	0.00770579	0.016764
YDL214C	PRR2	1.93705	1.19752	0.258824	2.8981e-07	5.17358e-07	1.36928	0.311085	2.17261e-07	5.00637e-07	-0.105544	0.270362	0.568277	0.660784
YDL215C	GDH2	16.8838	-0.183723	0.122858	0.124382	0.145589	0.972924	0.140312	2.99889e-13	1.01361e-12	-1.10877	0.200854	1.08026e-10	7.784e-10
YDL216C	RRI1	6.66436	-0.358972	0.133105	0.00542392	0.0072497	-0.186374	0.148524	0.175866	0.212283	-0.121283	0.178481	0.425655	0.523903
YDL217C	TIM22	17.9653	0.0209968	0.0965173	0.824867	0.842698	0.866018	0.111023	6.83914e-16	2.71361e-15	-0.788004	0.150322	4.15126e-09	2.5639e-08
YDL218W	YDL218W	1.74496	-1.27162	0.287976	6.0015e-07	1.04942e-06	-0.218333	0.269975	0.316549	0.362112	-0.567771	0.377638	0.00893055	0.0190756
YDL219W	DTD1	38.0775	0.516447	0.0664116	4.66957e-15	1.17082e-14	1.01471	0.0755395	2.50376e-42	3.13295e-41	-0.469784	0.0984419	5.43037e-07	2.52796e-06
YDL220C	CDC13	4.31356	0.882	0.195776	1.51926e-06	2.60241e-06	0.878051	0.22357	8.61672e-06	1.72042e-05	-0.0232474	0.227995	0.893407	0.928309
YDL221W	YDL221W
YDL222C	FMP45	3.4263	-0.681794	0.210356	0.000477377	0.000698578	-1.04338	0.255261	2.37466e-06	4.98972e-06	0.235457	0.252801	0.190407	0.272165
YDL223C	HBT1	7.00487	-2.25414	0.180079	2.36382e-38	1.21709e-37	-2.44074	0.206493	5.82329e-35	5.47472e-34	0.121325	0.214574	0.473375	0.571136
YDL224C	WHI4	27.9464	-0.309186	0.0752937	3.35751e-05	5.36088e-05	-0.246023	0.0837217	0.00252605	0.00397573	-0.052122	0.107766	0.608804	0.696962
YDL225W	SHS1	48.5874	-0.442489	0.0578554	1.45308e-14	3.57064e-14	-0.719129	0.0652441	6.04973e-29	4.45358e-28	0.265305	0.0849782	0.00120554	0.00314795
YDL226C	GCS1	116.278	1.00913	0.0415377	3.5843e-131	9.72909e-130	1.02403	0.0461658	3.25488e-110	2.20873e-108	-0.0159561	0.0610273	0.790374	0.846166
YDL227C	HO	355.798	-3.41346	0.0549161	0	0	-2.5034	0.0581479	0	0	-0.883642	0.0806704	8.22751e-30	2.41935e-28
YDL228C	YDL228C
YDL229W	SSB1	2542.07	0.418666	0.0260998	4.91845e-58	3.69792e-57	0.174486	0.0273114	1.4648e-10	4.16614e-10	0.241087	0.0376143	1.08766e-10	7.82197e-10
YDL230W	PTP1	21.6197	0.122636	0.0826941	0.13287	0.154942	-0.180785	0.0931327	0.0447886	0.0598803	0.279058	0.119849	0.0123259	0.0254451
YDL231C	BRE4	56.7946	-1.14894	0.0574713	6.53868e-90	9.13172e-89	-1.50754	0.0644159	7.809e-123	7.0056e-121	0.339388	0.0841898	2.86607e-05	0.000101364
YDL232W	OST4
YDL233W	MFG1	20.8908	0.738468	0.0778031	8.40343e-22	2.66025e-21	0.337668	0.0877981	7.5679e-05	0.000139232	0.357625	0.11333	0.000743805	0.0020346
YDL234C	GYP7	10.8103	0.104703	0.10805	0.322191	0.356322	-0.00867526	0.120581	0.939683	0.948644	0.0952612	0.150734	0.478669	0.575948
YDL235C	YPD1	160.735	-0.650498	0.0386805	8.57431e-64	7.18099e-63	-0.276535	0.0424902	5.50263e-11	1.61628e-10	-0.363654	0.0569776	8.97906e-11	6.51987e-10
YDL236W	PHO13	95.2319	0.17188	0.0424062	4.72993e-05	7.45549e-05	0.246453	0.0472834	1.43419e-07	3.35299e-07	-0.0741001	0.0625892	0.227633	0.315408
YDL237W	AIM6	58.4041	0.499705	0.0511442	9.7687e-23	3.19171e-22	-0.0617057	0.0571988	0.274618	0.318832	0.54349	0.0765894	2.14881e-13	1.97117e-12
YDL238C	GUD1	1.85917	-0.0376916	0.22508	0.855582	0.870382	-0.58922	0.274961	0.00875967	0.0128649	0.366725	0.294546	0.0580863	0.0992096
YDL239C	ADY3	10.5833	-1.42902	0.140597	1.10241e-25	3.98569e-25	-0.6135	0.153649	1.8342e-05	3.55621e-05	-0.63534	0.204107	0.000140535	0.000443298
YDL240W	LRG1	10.9695	0.877024	0.12547	6.61027e-13	1.52255e-12	0.468599	0.137638	0.000294695	0.000511752	0.310717	0.169878	0.0339787	0.0626871
YDL241W	YDL241W	56.5556	-1.16617	0.0757364	1.59755e-54	1.12444e-53	0.0166921	0.0799731	0.830776	0.857594	-1.16172	0.114508	1.3334e-26	3.13675e-25
YDL242W	YDL242W
YDL243C	AAD4
YDL244W	THI13
YDL245C	HXT15
YDL246C	SOR2
YDL247W	MPH2
YDL248W	COS7
YDR001C	NTH1	72.6985	0.738598	0.0632367	5.97768e-32	2.56193e-31	0.545009	0.0693163	1.42212e-15	5.51854e-15	0.176304	0.0908263	0.0431122	0.0771183
YDR002W	YRB1	469.929	-0.236869	0.0275583	7.44741e-18	2.0912e-17	0.0207998	0.0296692	0.481762	0.53058	-0.254712	0.040325	2.02918e-10	1.41694e-09
YDR003W	RCR2	19.7292	-0.615619	0.0869333	7.19361e-13	1.65263e-12	-0.54072	0.0977773	1.19714e-08	3.03761e-08	-0.0571039	0.122735	0.616941	0.704524
YDR004W	RAD57	15.3901	0.0389706	0.0980905	0.685947	0.712184	0.0416896	0.107342	0.685754	0.725214	-0.00404893	0.136848	0.974136	0.989275
YDR005C	MAF1	23.966	-0.316976	0.084369	0.000142158	0.000216779	-0.560763	0.0935092	7.10493e-10	1.95459e-09	0.225447	0.119587	0.0431932	0.077237
YDR006C	SOK1	45.6062	0.0989463	0.0616575	0.105812	0.124903	-0.110548	0.0677401	0.09664	0.121847	0.199515	0.0894924	0.0206318	0.0402669
YDR007W	TRP1	41.9169	1.38052	0.0630058	9.48868e-108	1.83298e-106	1.3881	0.0713252	5.61044e-86	2.15189e-84	-0.00956348	0.0913897	0.913486	0.943062
YDR008C	YDR008C
YDR009W	GAL3
YDR010C	YDR010C
YDR011W	SNQ2	423.635	0.347574	0.0396927	1.63324e-18	4.69567e-18	0.130354	0.0419423	0.00174597	0.00279535	0.210936	0.0571771	0.000176643	0.000547406
YDR012W	RPL4B
YDR013W	PSF1	36.5462	-0.523723	0.0677245	6.47549e-15	1.61066e-14	-0.130823	0.0746394	0.073274	0.0940444	-0.363746	0.0987482	0.000109044	0.000351718
YDR014W	RAD61	3.95783	-1.30447	0.209209	2.52623e-11	5.44213e-11	-1.17411	0.241358	4.14567e-08	1.00105e-07	-0.0499539	0.235849	0.772748	0.832178
YDR015C	YDR015C
YDR016C	DAD1	36.3926	0.0833133	0.0701696	0.230535	0.260509	0.140425	0.0779242	0.0650267	0.0844007	-0.0558195	0.101298	0.563247	0.655512
YDR017C	KCS1	50.8542	0.779906	0.0581375	1.62905e-41	9.05733e-41	0.256263	0.0637034	4.3293e-05	8.14321e-05	0.496167	0.0853533	1.43695e-09	9.21913e-09
YDR018C	YDR018C	1.25343	-0.56602	0.28252	0.0223778	0.0284043	-0.760714	0.33929	0.0035008	0.00540699	0.131357	0.29534	0.396164	0.494784
YDR019C	GCV1	39.9998	2.14612	0.0969106	5.68803e-111	1.15352e-109	0.0381706	0.0996834	0.69148	0.730539	2.08566	0.141474	2.66264e-50	2.07255e-48
YDR020C	DAS2	33.7189	-2.63505	0.0835986	1.31314e-220	1.19836e-218	-2.58176	0.0964205	9.00294e-161	1.58842e-158	-0.0443834	0.118878	0.689739	0.765836
YDR021W	FAL1	26.5307	-0.508886	0.0729848	1.97346e-12	4.44113e-12	-0.194926	0.081928	0.0145775	0.0207919	-0.283589	0.106293	0.0048207	0.0110125
YDR022C	ATG31	15.3095	-1.28622	0.105906	3.82504e-35	1.78221e-34	-1.2885	0.120998	5.1002e-28	3.61175e-27	0.00930012	0.144778	0.943354	0.965611
YDR023W	SES1	475.252	0.500636	0.0285406	4.51188e-69	4.13173e-68	0.301459	0.0306037	4.69315e-23	2.66532e-22	0.195689	0.0415886	2.08273e-06	8.89024e-06
YDR024W	FYV1
YDR025W	RPS11A
YDR026C	NSI1	43.021	-0.0902456	0.0657817	0.166384	0.191451	0.0654636	0.0714986	0.350568	0.396401	-0.146995	0.0945811	0.105246	0.165596
YDR027C	VPS54	40.6595	-0.115225	0.05881	0.0484542	0.0592853	-0.335663	0.0660605	2.38571e-07	5.47359e-07	0.211982	0.0862214	0.010721	0.0224205
YDR028C	REG1	79.8583	0.282652	0.0468811	1.42147e-09	2.84778e-09	0.21554	0.0517571	2.54303e-05	4.88045e-05	0.0625688	0.0686306	0.351158	0.45048
YDR029W	YDR029W
YDR030C	RAD28	9.17915	-0.693661	0.121401	4.53247e-09	8.84927e-09	-0.88367	0.141266	4.06224e-11	1.20321e-10	0.163934	0.165141	0.255175	0.346614
YDR031W	MIX14	20.4414	-0.67282	0.110425	4.82018e-10	9.87354e-10	-0.594724	0.123334	4.37684e-07	9.82886e-07	-0.051439	0.149984	0.701743	0.775893
YDR032C	PST2	154.704	-0.0241416	0.0472328	0.607633	0.638515	-0.285184	0.0515297	2.21774e-08	5.48271e-08	0.254236	0.0688929	0.000158591	0.000495526
YDR033W	MRH1	71.1743	0.415274	0.112568	0.000163361	0.00024797	0.160454	0.115774	0.145635	0.178312	0.207709	0.15033	0.122742	0.188366
YDR034C	LYS14	19.1148	0.293297	0.0852795	0.000493426	0.000721066	-0.228399	0.0952841	0.0130709	0.0187289	0.48146	0.12535	3.02475e-05	0.000106379
YDR035W	ARO3	106.891	-0.937289	0.0458843	1.93483e-93	2.8848e-92	-0.349927	0.0499447	1.51347e-12	4.89357e-12	-0.568817	0.0675315	5.94521e-18	7.67512e-17
YDR036C	EHD3	50.1872	0.119494	0.0496254	0.0154962	0.0199711	-0.13791	0.0556012	0.0120245	0.0173422	0.249294	0.0734278	0.000485045	0.00138252
YDR037W	KRS1	748.442	0.820583	0.0252539	3.8779e-232	3.73195e-230	-0.0448322	0.0267866	0.0932649	0.117957	0.861492	0.0369424	4.82347e-122	3.19133e-119
YDR038C	ENA5
YDR039C	ENA2
YDR040C	ENA1
YDR041W	RSM10	42.0135	-1.05317	0.0715613	6.88078e-50	4.39324e-49	-0.334163	0.0774028	1.00592e-05	1.99115e-05	-0.673244	0.105525	1.21556e-11	9.58865e-11
YDR042C	YDR042C	15.8967	-2.49215	0.143211	2.37468e-70	2.22463e-69	-3.09654	0.167218	7.10955e-79	2.36672e-77	0.446877	0.198264	0.00598295	0.0133563
YDR043C	NRG1	6.01889	-0.958312	0.173011	5.5278e-09	1.07489e-08	0.0226813	0.17487	0.886188	0.90552	-0.802957	0.2696	6.0417e-05	0.000204207
YDR044W	HEM13	58.9711	-0.308645	0.114471	0.00579377	0.00773039	-0.568491	0.121204	9.16368e-07	1.9952e-06	0.22638	0.153114	0.0973194	0.154967
YDR045C	RPC11	90.2338	-0.712575	0.0476289	5.26945e-51	3.46044e-50	-0.185946	0.0522535	0.000319603	0.000553371	-0.50841	0.0703165	1.24654e-13	1.15147e-12
YDR046C	BAP3	143.161	-0.209988	0.0426348	7.68254e-07	1.33586e-06	-0.298008	0.0460768	6.88374e-11	2.0108e-10	0.0871517	0.061858	0.151543	0.225125
YDR047W	HEM12	83.6575	-0.667731	0.0436314	3.23479e-53	2.22361e-52	-0.522731	0.0487239	3.06295e-27	2.08651e-26	-0.137739	0.0643312	0.0291265	0.0547856
YDR048C	YDR048C
YDR049W	VMS1	25.256	-0.305523	0.0791837	9.55788e-05	0.000147794	-0.142381	0.0878183	0.094971	0.120058	-0.143235	0.11336	0.179454	0.258956
YDR050C	TPI1	2614.96	-0.284534	0.0390887	2.89598e-13	6.75261e-13	-0.109009	0.0406745	0.00697564	0.010383	-0.170635	0.0558612	0.00194217	0.00486048
YDR051C	DET1	30.0979	1.14299	0.0751871	3.49473e-53	2.39917e-52	1.11018	0.0846136	1.18775e-40	1.39396e-39	0.0248666	0.107094	0.806641	0.858201
YDR052C	DBF4	43.0499	0.753533	0.0604757	4.37543e-36	2.10156e-35	0.809703	0.06733	3.63664e-34	3.3418e-33	-0.0564484	0.0874397	0.502766	0.599491
YDR053W	YDR053W
YDR054C	CDC34	21.4271	-0.151774	0.105264	0.141074	0.163894	0.0324336	0.112144	0.762412	0.796417	-0.158537	0.144368	0.226425	0.313899
YDR055W	PST1	63.9835	0.157203	0.0712509	0.0258229	0.0325818	0.563929	0.0780025	1.71586e-13	5.90509e-13	-0.383068	0.102851	8.38849e-05	0.000275607
YDR056C	EMC10	91.3902	-0.616361	0.045661	8.11033e-42	4.53784e-41	-0.942881	0.051678	1.88323e-75	5.8635e-74	0.316922	0.0678649	1.76814e-06	7.63981e-06
YDR057W	YOS9	11.1413	-0.946271	0.118462	2.6485e-16	7.05512e-16	-1.04083	0.13636	1.32801e-15	5.16471e-15	0.0861968	0.159663	0.540381	0.634199
YDR058C	TGL2	5.30349	-0.636799	0.154467	1.74214e-05	2.81992e-05	-0.31112	0.175493	0.0498756	0.0660942	-0.211425	0.202999	0.20066	0.283982
YDR059C	UBC5	32.5484	-0.195036	0.0776794	0.0110738	0.0144404	-0.434896	0.0865559	2.53534e-07	5.80179e-07	0.224432	0.111361	0.0321202	0.0596116
YDR060W	MAK21	150.516	0.30203	0.0395178	1.80367e-14	4.41981e-14	0.28544	0.0428229	1.87225e-11	5.64983e-11	0.0145997	0.0575236	0.796679	0.851196
YDR061W	YDR061W	49.8417	-0.490636	0.0599291	1.76223e-16	4.73236e-16	-0.681703	0.0670767	6.80322e-25	4.21163e-24	0.183712	0.0872826	0.0289419	0.0545352
YDR062W	LCB2	99.4872	-0.0960343	0.0440014	0.0284076	0.0357068	-0.330323	0.0484737	6.10509e-12	1.90308e-11	0.229014	0.0645632	0.000293023	0.000877245
YDR063W	AIM7	48.2799	0.78309	0.0563158	1.9181e-44	1.12306e-43	0.617566	0.0630666	3.63213e-23	2.07612e-22	0.152375	0.082238	0.0557405	0.0961024
YDR064W	RPS13	3388.8	-0.0076984	0.033545	0.818064	0.83624	0.117558	0.0349642	0.000727256	0.00121049	-0.12369	0.0481051	0.0093668	0.0198791
YDR065W	RRG1	11.458	-2.44321	0.141418	2.18509e-69	2.00793e-68	-1.88735	0.157441	3.5338e-35	3.35806e-34	-0.406318	0.189446	0.0103029	0.0216402
YDR066C	RTR2	5.45583	1.79142	0.191713	1.09473e-22	3.56359e-22	1.66948	0.213098	5.89195e-17	2.46921e-16	0.061886	0.220226	0.716873	0.788531
YDR067C	OCA6	22.5346	-0.563917	0.0853676	2.23859e-11	4.83232e-11	-0.251442	0.0945679	0.00593414	0.008913	-0.272157	0.121775	0.0163606	0.0327435
YDR068W	DOS2	35.2423	0.851943	0.0660844	1.3242e-38	6.86485e-38	0.333108	0.0743982	4.82475e-06	9.87634e-06	0.481593	0.0979155	2.22941e-07	1.09974e-06
YDR069C	DOA4	8.05844	-0.669243	0.141354	9.49912e-07	1.63882e-06	-0.793494	0.161701	1.33085e-07	3.12243e-07	0.109673	0.184008	0.479129	0.57608
YDR070C	FMP16	8.35373	0.0965923	0.151008	0.505909	0.539548	0.430087	0.166812	0.00482306	0.00732524	-0.267398	0.198901	0.100018	0.158786
YDR071C	PAA1	154.142	0.418348	0.0369748	8.26949e-30	3.36695e-29	0.345759	0.0407441	1.33564e-17	5.75695e-17	0.0693518	0.0543827	0.196287	0.278986
YDR072C	IPT1	50.917	0.307831	0.0583819	1.13014e-07	2.05986e-07	0.514613	0.0643152	5.09878e-16	2.03375e-15	-0.199231	0.0846016	0.0148319	0.030044
YDR073W	SNF11	38.8622	0.135936	0.064833	0.0344489	0.0429233	0.709636	0.0726126	3.08664e-23	1.76623e-22	-0.547735	0.096284	2.302e-09	1.44537e-08
YDR074W	TPS2	53.0511	-0.0451057	0.070047	0.515607	0.549116	-0.0844021	0.0757714	0.254939	0.298142	0.038221	0.0999111	0.687891	0.763954
YDR075W	PPH3	12.8451	0.307563	0.103771	0.00252091	0.00346396	0.16875	0.11275	0.116866	0.145341	0.111029	0.142747	0.390359	0.488687
YDR076W	RAD55	0.591121	1.19245	0.452217	0.000568002	0.000823005	0.625297	0.431387	0.02945	0.040446	0.125664	0.348982	1	1
YDR077W	SED1	820.441	0.038416	0.0658844	0.556478	0.58956	1.32959	0.0696862	1.01025e-82	3.6625e-81	-1.2802	0.0976295	2.87142e-41	1.61572e-39
YDR078C	SHU2	77.113	-1.48539	0.108343	2.85784e-44	1.66776e-43	-0.199074	0.11167	0.0619291	0.0806373	-1.23186	0.165001	3.65591e-16	4.17943e-15
YDR079W	PET100	47.9206	-0.665714	0.0612589	7.43141e-28	2.86694e-27	-0.33855	0.0678223	3.77994e-07	8.50646e-07	-0.303811	0.0891786	0.000397384	0.00115379
YDR080W	VPS41	15.4447	0.70487	0.0959919	8.40022e-14	2.00281e-13	0.451032	0.106988	1.18512e-05	2.33365e-05	0.208891	0.13436	0.0892015	0.144342
YDR081C	PDC2	24.7806	0.473163	0.0792786	1.61448e-09	3.2308e-09	-0.0102716	0.0861922	0.902542	0.918683	0.444359	0.115232	3.50993e-05	0.000122224
YDR082W	STN1	8.65809	0.244615	0.114777	0.0290757	0.0364859	0.168103	0.128613	0.165704	0.200932	0.0538139	0.157785	0.699553	0.773696
YDR083W	RRP8	60.6051	-0.0690466	0.0581328	0.23172	0.261735	0.234769	0.0636058	0.000175353	0.000311561	-0.291857	0.0844882	0.00035159	0.00103422
YDR084C	TVP23	51.0837	0.607105	0.0559935	1.1246e-27	4.32281e-27	0.381078	0.0628953	7.88832e-10	2.16561e-09	0.21042	0.0821758	0.00822256	0.0177136
YDR085C	AFR1	5.52208	1.58628	0.162194	3.10503e-24	1.0672e-23	2.53002	0.201424	5.78805e-39	6.35605e-38	-0.70412	0.253509	0.0002179	0.000663604
YDR086C	SSS1	636.585	-0.604401	0.0215349	1.33192e-173	6.65082e-172	-0.501391	0.0234487	8.54119e-102	5.02317e-100	-0.101634	0.0317083	0.00128929	0.00334847
YDR087C	RRP1	104.98	-0.715049	0.0410299	2.02346e-68	1.81528e-67	-0.204856	0.0454235	5.39057e-06	1.09866e-05	-0.496482	0.0609201	1.09281e-16	1.28539e-15
YDR088C	SLU7	11.7471	0.878623	0.111623	8.43182e-16	2.1931e-15	0.418478	0.123163	0.000348341	0.000600381	0.372067	0.1558	0.00690423	0.0151587
YDR089W	VTC5	26.658	0.980669	0.0848024	1.08971e-31	4.62908e-31	0.679842	0.0930179	6.29167e-14	2.21717e-13	0.259552	0.119288	0.0193435	0.0380332
YDR090C	ILT1	18.1066	-0.0882237	0.103063	0.382705	0.417748	-0.0446334	0.110427	0.67301	0.713161	-0.0354152	0.141443	0.782151	0.839327
YDR091C	RLI1	89.544	-0.343781	0.0533063	9.13508e-11	1.91873e-10	-0.271015	0.0573289	1.66232e-06	3.53644e-06	-0.0667765	0.0765445	0.369447	0.468604
YDR092W	UBC13
YDR093W	DNF2	91.9305	0.465909	0.0523919	4.09801e-19	1.2017e-18	-0.360945	0.0566017	1.08937e-10	3.12692e-10	0.812166	0.0778489	3.14005e-27	7.69458e-26
YDR094W	YDR094W
YDR095C	YDR095C
YDR096W	GIS1	13.105	-0.346079	0.115894	0.00223808	0.00309057	0.258788	0.126572	0.0303321	0.0415819	-0.531314	0.167818	0.000256581	0.000773395
YDR097C	MSH6	27.1937	-0.212958	0.0826484	0.0090432	0.0118744	-0.395574	0.0907961	7.27237e-06	1.46304e-05	0.170786	0.116724	0.11794	0.182053
YDR098C	GRX3	93.4271	0.0618292	0.0439108	0.157425	0.181892	-0.19814	0.0487246	4.01038e-05	7.55676e-05	0.253913	0.0648044	6.27484e-05	0.000211411
YDR099W	BMH2	189.132	0.488625	0.0295573	1.44652e-61	1.15308e-60	0.366143	0.0330085	8.18878e-29	5.99491e-28	0.119541	0.0439771	0.0060396	0.0134657
YDR100W	TVP15	38.7968	0.462091	0.0662361	2.0871e-12	4.68888e-12	0.217336	0.0743184	0.00279408	0.00437417	0.223417	0.0966177	0.0154793	0.0312122
YDR101C	ARX1	206.657	-0.55622	0.0354831	1.29281e-55	9.3227e-55	-0.298514	0.0383905	5.18499e-15	1.95611e-14	-0.251149	0.0518116	9.25975e-07	4.16768e-06
YDR102C	YDR102C
YDR103W	STE5	7.42483	0.0529083	0.146279	0.707491	0.732684	-0.0471741	0.155273	0.742116	0.778134	0.0783211	0.189377	0.618849	0.706174
YDR104C	SPO71	16.8899	-0.622788	0.0866228	3.22269e-13	7.50779e-13	-0.813912	0.10155	1.50582e-16	6.19774e-16	0.17657	0.124981	0.126305	0.193217
YDR105C	TMS1	29.0661	-0.342886	0.0723721	1.7454e-06	2.98591e-06	-0.405392	0.0809713	2.99458e-07	6.8232e-07	0.0630999	0.103989	0.523191	0.619614
YDR106W	ARP10	4.30437	-1.26289	0.187493	1.06379e-12	2.41865e-12	-1.02317	0.216983	1.43526e-07	3.35383e-07	-0.121829	0.222931	0.480756	0.577671
YDR107C	TMN2	10.1526	0.0271708	0.117851	0.813206	0.831909	-0.745692	0.13812	1.18011e-08	2.99872e-08	0.689101	0.182791	8.07803e-06	3.12095e-05
YDR108W	TRS85	15.9409	-0.383394	0.0892789	1.34124e-05	2.18773e-05	-0.251751	0.100577	0.00930399	0.0136227	-0.107847	0.126748	0.357268	0.456299
YDR109C	YDR109C	18.8011	-0.596285	0.0938554	1.10884e-10	2.32163e-10	-0.544435	0.104743	7.41321e-08	1.76669e-07	-0.0351385	0.130725	0.769836	0.830055
YDR110W	FOB1	28.3247	-0.377967	0.068267	2.39634e-08	4.49942e-08	-0.272142	0.0765396	0.000274418	0.000478897	-0.092914	0.0988459	0.324875	0.423434
YDR111C	ALT2	94.6954	0.389585	0.0557458	2.13477e-12	4.7899e-12	2.62089	0.0663074	0	0	-2.21995	0.0867176	1.39541e-144	1.23099e-141
YDR112W	IRC2
YDR113C	PDS1	38.8569	0.387838	0.0609997	1.5723e-10	3.27775e-10	0.0708642	0.0678531	0.287833	0.332714	0.297387	0.0895331	0.000530681	0.00150048
YDR114C	YDR114C
YDR115W	MRX14	99.1784	-1.07084	0.0552491	1.42139e-84	1.73751e-83	0.0271532	0.0589236	0.64054	0.683957	-1.08484	0.0826123	8.92874e-42	5.19339e-40
YDR116C	MRPL1	43.826	-0.58111	0.0644665	1.08932e-19	3.2392e-19	0.316279	0.0702087	4.40313e-06	9.05781e-06	-0.876892	0.0971453	1.82656e-21	3.07898e-20
YDR117C	TMA64	35.1113	-0.0701285	0.0684219	0.300902	0.334244	-0.544017	0.0775159	8.47324e-13	2.79781e-12	0.448859	0.101399	3.0229e-06	1.25887e-05
YDR118W	APC4	6.65783	0.14135	0.133834	0.27566	0.307691	0.0929787	0.146824	0.495813	0.545033	0.0313888	0.178225	0.836615	0.883344
YDR119W	VBA4	35.3933	0.388601	0.0768837	3.29974e-07	5.85503e-07	0.424733	0.0833273	1.77798e-07	4.12034e-07	-0.0386668	0.10811	0.705466	0.778897
YDR120C	TRM1	77.3088	0.403832	0.0460223	1.29646e-18	3.74162e-18	0.0800414	0.0504505	0.109054	0.136395	0.312281	0.0675745	2.24745e-06	9.55483e-06
YDR121W	DPB4	76.0793	-0.127365	0.0499128	0.0103092	0.0134832	-0.151084	0.0552898	0.00566295	0.00852019	0.0245126	0.0731192	0.731006	0.800583
YDR122W	KIN1	26.7149	0.91795	0.078832	5.24133e-32	2.24999e-31	0.224713	0.0877279	0.0083086	0.0122329	0.637991	0.118	5.49266e-09	3.35712e-08
YDR123C	INO2	0.572289	0.115608	0.366616	0.694135	0.719697	0.383865	0.381753	0.143747	0.176164	-0.137777	0.347698	0.335203	0.433479
YDR124W	YDR124W	0.310618	0.619764	0.517917	0.0755406	0.0906864	0.0342686	0.421455	0.892416	0.910829	0.177209	0.416533	0.162038	0.238374
YDR125C	ECM18	0.423275	-0.805383	0.486149	0.0206045	0.0262037	-0.647113	0.48882	0.0314135	0.042942	-0.00634515	0.358108	1	1
YDR126W	SWF1	6.84099	0.0890054	0.130755	0.483009	0.517524	0.16385	0.145042	0.224557	0.265367	-0.0679152	0.175452	0.651294	0.733624
YDR127W	ARO1	165.357	-0.0181244	0.0417687	0.663207	0.690471	-0.0514962	0.0452027	0.250835	0.294187	0.0328949	0.0608447	0.582119	0.673624
YDR128W	MTC5	24.01	0.123639	0.0768572	0.103615	0.122555	-0.112114	0.0857234	0.178725	0.215438	0.218334	0.111174	0.0367486	0.0671188
YDR129C	SAC6	142.223	0.947364	0.0357552	2.11857e-155	8.36833e-154	0.576418	0.039906	9.47395e-48	1.47922e-46	0.361282	0.0531348	5.34619e-12	4.38719e-11
YDR130C	FIN1	11.4816	-0.597914	0.112923	6.19249e-08	1.14046e-07	-0.389722	0.127378	0.00121976	0.00198468	-0.157035	0.155142	0.254612	0.346288
YDR131C	YDR131C	13.6038	-0.387647	0.0987271	6.53714e-05	0.000102128	-0.677684	0.114477	7.47175e-10	2.05337e-09	0.259723	0.140812	0.0417806	0.0749643
YDR132C	MRX16	20.8883	-1.16284	0.0915519	5.51351e-38	2.81146e-37	-1.36662	0.104216	6.82823e-41	8.08541e-40	0.17997	0.128685	0.128844	0.196533
YDR133C	YDR133C
YDR134C	CCW22
YDR135C	YCF1	144.245	1.60251	0.0515095	3.83625e-214	3.27504e-212	1.34592	0.0561603	1.67197e-128	1.66976e-126	0.242709	0.0744485	0.000806414	0.0021934
YDR136C	VPS61
YDR137W	RGP1	32.6451	0.172737	0.0648551	0.00722849	0.00956432	0.133845	0.0724975	0.0594924	0.0777707	0.0335099	0.0943459	0.710855	0.783702
YDR138W	HPR1	2.17777	-0.736795	0.244101	0.000859398	0.00122613	-1.30303	0.310147	6.36512e-07	1.40847e-06	0.317387	0.2926	0.0892542	0.144383
YDR139C	RUB1
YDR140W	MTQ2	34.4442	0.328216	0.0652438	4.02143e-07	7.09837e-07	0.759204	0.0742647	2.68678e-25	1.68897e-24	-0.408555	0.0965174	8.94008e-06	3.42649e-05
YDR141C	DOP1	41.8172	0.784424	0.062269	7.088e-37	3.46735e-36	0.0862976	0.0685427	0.199858	0.238576	0.666616	0.0931716	5.45648e-14	5.12986e-13
YDR142C	PEX7	12.1521	-0.0673087	0.114811	0.548327	0.581856	-0.355863	0.12666	0.0029664	0.00463161	0.251201	0.157987	0.0717713	0.119687
YDR143C	SAN1	42.7982	-0.558768	0.0640475	1.54274e-18	4.44515e-18	-0.311293	0.0697938	5.48772e-06	1.1176e-05	-0.22749	0.0920026	0.00990659	0.0208907
YDR144C	MKC7	73.862	0.544006	0.0466329	1.13686e-31	4.8255e-31	0.644922	0.051497	1.51013e-36	1.50246e-35	-0.0995876	0.0681426	0.135127	0.204118
YDR145W	TAF12
YDR146C	SWI5	13.5543	0.499548	0.107777	2.26881e-06	3.85392e-06	0.132433	0.116675	0.233249	0.27478	0.30507	0.150153	0.022705	0.0438924
YDR147W	EKI1	23.3456	-0.760944	0.0784756	1.07935e-22	3.51786e-22	-0.888682	0.0899427	5.15066e-24	3.05976e-23	0.120921	0.112749	0.252756	0.344005
YDR148C	KGD2	86.7956	-0.260836	0.0537232	1.05421e-06	1.81403e-06	0.0373417	0.0578075	0.512945	0.561999	-0.286014	0.0777742	0.000151392	0.000475842
YDR149C	YDR149C
YDR150W	NUM1	77.9584	0.751935	0.0500225	1.62099e-51	1.07653e-50	-0.0447793	0.0550029	0.410145	0.458555	0.779387	0.0751334	7.90766e-27	1.91996e-25
YDR151C	CTH1	31.0346	-1.02357	0.0841946	7.94097e-35	3.66448e-34	-1.02542	0.0934068	3.0166e-29	2.26802e-28	0.00726142	0.117653	0.94744	0.968856
YDR152W	GIR2	162.611	-0.0474713	0.035481	0.179753	0.206027	-0.0675714	0.0390619	0.0818057	0.104337	0.0201223	0.0523211	0.697058	0.771706
YDR153C	ENT5	93.1507	-0.483144	0.0423334	2.41382e-30	9.90413e-30	-0.433913	0.0470555	1.50861e-20	7.5616e-20	-0.045565	0.0623087	0.456492	0.554685
YDR154C	YDR154C
YDR155C	CPR1	2685.48	0.59782	0.031017	4.73253e-83	5.55416e-82	0.0859888	0.0323602	0.00762051	0.0112953	0.505095	0.0447469	3.75445e-30	1.15537e-28
YDR156W	RPA14	159.94	-0.846151	0.047899	2.09487e-70	1.96599e-69	-0.387483	0.0514562	2.88298e-14	1.03948e-13	-0.441002	0.0695693	8.84061e-11	6.4365e-10
YDR157W	YDR157W
YDR158W	HOM2	267.537	-0.056869	0.0517909	0.26954	0.301177	-0.418203	0.0549834	1.50162e-14	5.52716e-14	0.35002	0.0744531	1.34639e-06	5.89937e-06
YDR159W	SAC3	30.797	0.232168	0.071203	0.000993945	0.00140818	-0.119539	0.0781491	0.117356	0.145883	0.329414	0.103203	0.000757761	0.00206744
YDR160W	SSY1	13.7922	0.413177	0.0976507	1.70428e-05	2.75949e-05	0.397194	0.109464	0.00015515	0.000277155	0.00360052	0.135993	0.97689	0.990829
YDR161W	ACL4	160.05	0.0581017	0.0385708	0.130754	0.152676	0.0425732	0.0418672	0.305918	0.351471	0.0148571	0.0563655	0.788916	0.844948
YDR162C	NBP2	39.9451	0.389238	0.0569098	6.10882e-12	1.34501e-11	0.290546	0.064382	4.48427e-06	9.21756e-06	0.0895854	0.083662	0.268141	0.361413
YDR163W	CWC15	16.9308	0.379131	0.102322	0.000161611	0.000245454	0.400988	0.114873	0.000259168	0.00045333	-0.0294365	0.141713	0.818763	0.867437
YDR164C	SEC1	28.0715	0.172843	0.0735308	0.0175051	0.0224508	-0.00320377	0.0809651	0.967665	0.971889	0.161751	0.105816	0.106859	0.167935
YDR165W	TRM82	117.772	-0.186222	0.0403269	3.59621e-06	6.04854e-06	-0.0323698	0.0439585	0.458148	0.507106	-0.149551	0.0590335	0.00999883	0.02106
YDR166C	SEC5	26.2585	0.168081	0.0704734	0.0160049	0.0206017	0.201619	0.0800516	0.00979365	0.0143001	-0.0352612	0.102653	0.717594	0.788996
YDR167W	TAF10	97.8957	-0.443646	0.0422031	5.42286e-26	1.9768e-25	-0.342138	0.0470518	2.23697e-13	7.60454e-13	-0.0963208	0.0622581	0.115401	0.178866
YDR168W	CDC37	72.3767	0.519336	0.0496092	7.53287e-26	2.73467e-25	0.568168	0.0552126	2.76001e-25	1.73295e-24	-0.0496899	0.0726146	0.483352	0.57987
YDR169C	STB3	11.943	0.576376	0.115091	2.99487e-07	5.34092e-07	0.399346	0.128252	0.000991911	0.00162897	0.130997	0.156412	0.344958	0.443386
YDR170C	SEC7	141.463	1.46325	0.043116	6.59658e-254	7.93539e-252	0.793393	0.0469387	6.44254e-65	1.60096e-63	0.651487	0.063589	9.27884e-26	2.05493e-24
YDR171W	HSP42	24.7437	-0.294921	0.105172	0.00423807	0.00572248	0.0353748	0.112638	0.742603	0.778336	-0.284611	0.14627	0.0298365	0.0559103
YDR172W	SUP35	269.74	0.330992	0.0291754	6.50796e-30	2.65792e-29	0.13758	0.0318071	1.4014e-05	2.73915e-05	0.190086	0.042915	7.76285e-06	3.01237e-05
YDR173C	ARG82	18.0744	-0.226648	0.0903824	0.0108887	0.014206	-0.487027	0.100833	5.93354e-07	1.31793e-06	0.238132	0.127919	0.0434502	0.0776704
YDR174W	HMO1	300.518	1.21072	0.0306465	0	0	0.769391	0.0331201	3.72432e-120	3.08013e-118	0.433605	0.0448854	1.5406e-22	2.81186e-21
YDR175C	RSM24	66.0758	-1.36086	0.0597622	4.39484e-116	9.5728e-115	-0.812792	0.0652062	1.60331e-36	1.59218e-35	-0.515637	0.0871739	7.15864e-10	4.76014e-09
YDR176W	NGG1	32.139	0.426414	0.0706791	1.16995e-09	2.351e-09	-0.0560196	0.0775467	0.460013	0.509063	0.452096	0.103622	3.9659e-06	1.62599e-05
YDR177W	UBC1	106.478	-0.210882	0.0389307	5.52972e-08	1.02196e-07	0.184284	0.0435304	1.98026e-05	3.83237e-05	-0.38771	0.0579971	1.13502e-11	8.97253e-11
YDR178W	SDH4	55.8096	-0.84079	0.0763646	9.31544e-29	3.69061e-28	-0.419799	0.0818632	1.52882e-07	3.56635e-07	-0.380382	0.108498	0.000194794	0.0005984
YDR179C	CSN9	16.6355	0.247056	0.103496	0.0149259	0.0192737	-0.0048205	0.112851	0.964371	0.969316	0.215281	0.144462	0.0976741	0.155439
YDR180W	SCC2	23.9823	0.298742	0.0836216	0.000297633	0.000443516	0.0955581	0.0910995	0.27934	0.323533	0.179141	0.11847	0.105201	0.165575
YDR181C	SAS4	14.6052	0.566965	0.112857	2.81798e-07	5.04075e-07	0.647945	0.125326	5.99333e-08	1.43282e-07	-0.0785791	0.152408	0.562814	0.655151
YDR182W	CDC1	44.7095	1.14204	0.0604074	1.04913e-80	1.18909e-79	0.608974	0.0671396	3.64974e-20	1.79203e-19	0.499985	0.0890139	4.62436e-09	2.84613e-08
YDR183W	PLP1	22.4977	-0.0553777	0.0757704	0.459895	0.494862	0.243873	0.08608	0.00354533	0.00547257	-0.279501	0.11079	0.00728883	0.0159289
YDR184C	ATC1	64.4706	-0.663026	0.0497801	8.13931e-41	4.46902e-40	-0.19986	0.0547349	0.00021835	0.00038537	-0.444437	0.0733062	4.46352e-10	3.0289e-09
YDR185C	UPS3	4.65353	-0.675449	0.195145	0.000221484	0.000333518	-0.717536	0.221854	0.000222486	0.000392278	0.0535553	0.229653	0.757572	0.821013
YDR186C	SND1	42.3116	0.498428	0.063581	2.9361e-15	7.43934e-15	0.0913085	0.0694881	0.180689	0.217657	0.381675	0.0926978	1.67296e-05	6.15785e-05
YDR187C	YDR187C
YDR188W	CCT6	263.722	-0.475476	0.0303724	2.09021e-55	1.50115e-54	-0.698807	0.0333703	5.01954e-98	2.63054e-96	0.220803	0.0447823	6.32043e-07	2.90399e-06
YDR189W	SLY1	84.5402	0.063607	0.0402853	0.11311	0.133161	-0.409918	0.0459225	2.39237e-19	1.12558e-18	0.46466	0.0607135	5.63173e-15	5.73246e-14
YDR190C	RVB1	131.176	-0.145655	0.0420932	0.000513664	0.000748164	-0.349462	0.0463459	2.90464e-14	1.04658e-13	0.199769	0.0617682	0.000990225	0.0026431
YDR191W	HST4	8.88584	-0.689592	0.127349	2.53461e-08	4.7506e-08	-0.678805	0.145995	7.48473e-07	1.64453e-06	0.00879363	0.169783	0.95225	0.97246
YDR192C	NUP42	21.7946	-0.179772	0.0704759	0.00999169	0.0130712	-0.413813	0.0808107	1.61273e-07	3.75217e-07	0.221467	0.103302	0.0238525	0.0458096
YDR193W	YDR193W
YDR194C	MSS116	84.1513	-0.938498	0.0580875	2.04888e-59	1.58317e-58	-0.0603842	0.0613808	0.318245	0.363865	-0.854628	0.0859609	4.38887e-25	9.29211e-24
YDR195W	REF2	28.1156	0.207411	0.0758362	0.00568295	0.00758635	0.296773	0.0837893	0.000274149	0.000478585	-0.0869362	0.108076	0.394956	0.493509
YDR196C	CAB5	35.3977	0.0657999	0.0627016	0.290178	0.322874	0.060374	0.0708106	0.384881	0.432154	0.00383793	0.092084	0.965398	0.982664
YDR197W	CBS2	22.6075	-0.459564	0.0791026	4.31169e-09	8.42131e-09	0.328815	0.0884527	0.000129373	0.000233154	-0.752318	0.12046	1.32382e-11	1.03961e-10
YDR198C	RKM2	22.7944	-0.00694539	0.0775383	0.927808	0.93755	-0.035492	0.0864348	0.673004	0.713161	0.0269726	0.111659	0.797769	0.851673
YDR199W	YDR199W
YDR200C	VPS64	20.4969	1.12956	0.0900786	4.79845e-37	2.36703e-36	0.887659	0.100375	9.47625e-20	4.589e-19	0.202316	0.125959	0.0823894	0.135112
YDR201W	SPC19	37.5257	-0.253865	0.067443	0.00014694	0.000223942	-0.168085	0.0750253	0.02198	0.0306643	-0.0759742	0.0975632	0.415449	0.513924
YDR202C	RAV2	18.8692	0.581243	0.0878298	1.9862e-11	4.29275e-11	0.202985	0.0978429	0.0314329	0.0429575	0.329995	0.126283	0.00459103	0.0105424
YDR203W	YDR203W
YDR204W	COQ4	43.1546	0.121981	0.0590232	0.0373759	0.0464173	-0.108585	0.0670492	0.0993347	0.124947	0.219975	0.0874394	0.00902089	0.0192453
YDR205W	MSC2	29.6303	-0.7045	0.0640721	1.63372e-28	6.42445e-28	-0.839844	0.0741609	1.22731e-30	9.6813e-30	0.130425	0.0942667	0.14856	0.221875
YDR206W	EBS1	53.357	-1.75213	0.0591245	7.4325e-195	4.97978e-193	-1.55873	0.0655804	1.29133e-126	1.19912e-124	-0.178967	0.0854341	0.0296236	0.0555873
YDR207C	UME6	31.5562	0.868751	0.0721001	4.90298e-34	2.21808e-33	0.294423	0.0801241	0.000165317	0.00029462	0.529547	0.10637	1.20855e-07	6.23477e-07
YDR208W	MSS4	59.4863	0.46006	0.0604598	1.90828e-14	4.66968e-14	0.403851	0.0655303	3.90345e-10	1.0857e-09	0.0491157	0.0865039	0.555845	0.648015
YDR209C	YDR209C
YDR210W	YDR210W
YDR211W	GCD6	105	0.0272483	0.0396013	0.489996	0.524267	-0.297287	0.0440271	1.00749e-11	3.09858e-11	0.318414	0.058669	3.1699e-08	1.77548e-07
YDR212W	TCP1	116.986	-0.288868	0.0382078	3.45187e-14	8.3276e-14	-0.160287	0.0423275	0.00013614	0.000244516	-0.124213	0.0564105	0.0255382	0.0487288
YDR213W	UPC2	18.6372	-0.860937	0.0907195	5.89859e-22	1.87515e-21	-1.19067	0.103916	7.9899e-32	6.63902e-31	0.292316	0.129391	0.0141218	0.0286935
YDR214W	AHA1	173.704	-0.311601	0.041036	2.62335e-14	6.36653e-14	-0.172854	0.0444695	8.8875e-05	0.000162324	-0.133576	0.0597752	0.0229955	0.0444216
YDR215C	YDR215C
YDR216W	ADR1	3.01334	0.391071	0.217535	0.051602	0.0630057	-0.369694	0.240414	0.0679728	0.087837	0.54552	0.311504	0.00821089	0.0177027
YDR217C	RAD9	23.33	1.10286	0.0914998	2.1626e-34	9.84235e-34	0.563238	0.101163	8.98783e-09	2.2993e-08	0.46861	0.131648	9.72517e-05	0.000315413
YDR218C	SPR28	0.627695	-0.206333	0.424572	0.513071	0.546635	0.266432	0.411371	0.309774	0.355361	-0.199956	0.398341	0.185366	0.266109
YDR219C	MFB1	20.6004	-0.285262	0.0885187	0.0010817	0.00152719	-0.382296	0.0983891	5.78638e-05	0.000107578	0.0936043	0.124495	0.417288	0.51557
YDR220C	YDR220C
YDR221W	GTB1	7.8037	1.09739	0.137619	1.78412e-16	4.7863e-16	1.06378	0.160685	1.90478e-12	6.11401e-12	0.00878232	0.179583	0.954108	0.973849
YDR222W	YDR222W	21.371	-1.31186	0.106933	7.73098e-36	3.68982e-35	-1.54263	0.118437	1.57606e-40	1.83746e-39	0.193788	0.145078	0.138	0.207923
YDR223W	CRF1	1.4397	-0.967832	0.308742	0.000276894	0.000413544	-2.13792	0.383966	9.08864e-11	2.62445e-10	0.543908	0.405481	0.00715148	0.0156555
YDR224C	HTB1	1190.73	-0.32623	0.0406483	8.37992e-16	2.18067e-15	0.0925227	0.0423581	0.0278072	0.0382891	-0.410195	0.0583775	9.05343e-13	7.92063e-12
YDR225W	HTA1	653.835	0.43939	0.0541269	3.40441e-16	9.01428e-16	0.315563	0.0565707	1.61663e-08	4.05151e-08	0.115623	0.0765521	0.120526	0.185395
YDR226W	ADK1	529.01	-0.141496	0.0333565	2.11565e-05	3.41511e-05	-0.0921202	0.0352253	0.00858273	0.0126225	-0.0480463	0.0481398	0.313085	0.410899
YDR227W	SIR4	17.2387	0.309311	0.0850721	0.000230755	0.000347084	-0.113659	0.0949008	0.21554	0.255682	0.385589	0.123978	0.000764993	0.00208488
YDR228C	PCF11	26.4903	-0.153283	0.0718429	0.031105	0.0389124	-0.266957	0.0811393	0.000736032	0.00122356	0.10946	0.104135	0.267721	0.360939
YDR229W	IVY1	17.8239	0.273852	0.0832066	0.000859426	0.00122613	0.0899658	0.0925431	0.315648	0.361394	0.161499	0.119123	0.145845	0.218376
YDR230W	YDR230W
YDR231C	COX20	27.1983	-0.468089	0.0720941	5.74109e-11	1.2194e-10	-0.486608	0.0837546	2.75646e-09	7.3096e-09	0.0238443	0.105531	0.811457	0.862274
YDR232W	HEM1	108.283	-0.723321	0.0555202	3.27715e-39	1.71913e-38	-0.497626	0.0593351	2.17869e-17	9.29986e-17	-0.211347	0.079364	0.00606973	0.0135215
YDR233C	RTN1	390.452	-0.0870638	0.0277173	0.00165242	0.00230286	0.0273941	0.0298051	0.356369	0.402532	-0.113196	0.0405011	0.00488573	0.0111474
YDR234W	LYS4	100.865	0.871349	0.0569376	1.80274e-53	1.2473e-52	0.541255	0.0605582	1.52788e-19	7.253e-19	0.310116	0.0813347	8.1231e-05	0.000267718
YDR235W	PRP42	21.2102	-0.129064	0.0795803	0.100568	0.119156	-0.153132	0.0884439	0.0744202	0.095423	0.0259105	0.113743	0.808678	0.85985
YDR236C	FMN1	46.4947	0.128049	0.0577906	0.0256688	0.0323951	0.229984	0.065005	0.000319373	0.000553156	-0.0995106	0.0847569	0.224088	0.311312
YDR237W	MRPL7	62.9249	-0.97676	0.0569899	1.34233e-66	1.17632e-65	-0.257158	0.0616488	2.27539e-05	4.38109e-05	-0.691094	0.0841921	1.40441e-17	1.77412e-16
YDR239C	YDR239C	29.9607	0.695179	0.0706884	3.3287e-23	1.10393e-22	0.270132	0.079264	0.000477943	0.000812902	0.388467	0.103585	7.39645e-05	0.000246223
YDR240C	SNU56	15.225	-0.881174	0.0948788	3.78843e-21	1.18093e-20	-0.699397	0.106754	1.22277e-11	3.73678e-11	-0.145786	0.132414	0.230978	0.319182
YDR241W	BUD26
YDR246W	TRS23	27.4049	-0.27725	0.0732149	0.000131382	0.000201217	-0.00636834	0.081669	0.936305	0.946137	-0.248684	0.106533	0.0139448	0.0283885
YDR247W	VHS1	2.935	-0.286421	0.217085	0.153384	0.177573	-0.368615	0.235882	0.0650708	0.0844373	0.0751731	0.249579	0.673119	0.751537
YDR248C	YDR248C	37.5268	-0.553897	0.0725887	1.35583e-14	3.33475e-14	-0.695869	0.0811694	2.22399e-18	9.97592e-18	0.135518	0.104078	0.170358	0.248335
YDR249C	YDR249C	13.5916	-0.986753	0.107392	6.77068e-21	2.0982e-20	-0.974162	0.121166	6.59997e-17	2.75937e-16	-0.00045565	0.145956	0.997239	1
YDR250C	YDR250C
YDR251W	PAM1	40.615	0.0977593	0.0605574	0.103839	0.122793	-0.516382	0.0680244	1.30479e-14	4.82282e-14	0.592233	0.0906761	7.70456e-12	6.20704e-11
YDR252W	BTT1	1.26892	-0.419992	0.284832	0.0920179	0.109376	0.0615995	0.286294	0.784279	0.815238	-0.245196	0.315584	0.20122	0.284622
YDR253C	MET32	10.6444	-0.60825	0.139084	6.13613e-06	1.01973e-05	-0.309116	0.151396	0.0272689	0.0376164	-0.212909	0.183052	0.171526	0.249831
YDR254W	CHL4	6.91491	3.64388	0.171	1.65035e-102	2.85467e-101	4.36271	0.220187	3.46722e-88	1.42263e-86	-0.479793	0.246697	0.00479089	0.0109537
YDR255C	RMD5	2.38603	1.24925	0.232856	5.39038e-09	1.04896e-08	2.28599	0.288232	5.8472e-18	2.56627e-17	-0.617242	0.336654	0.00326476	0.00773863
YDR256C	CTA1	2.82003	0.119511	0.215505	0.549262	0.58273	-0.622759	0.24326	0.00262016	0.0041165	0.532141	0.303004	0.0085347	0.0183262
YDR257C	RKM4	41.6233	-1.10493	0.0684786	1.66557e-59	1.29075e-58	-0.768943	0.0757012	5.05583e-25	3.13722e-24	-0.304916	0.0985709	0.00116345	0.00305011
YDR258C	HSP78	34.8052	0.369216	0.0918188	4.50717e-05	7.11072e-05	0.099801	0.0977695	0.290363	0.335419	0.234456	0.128015	0.0464946	0.0822512
YDR259C	YAP6	12.4239	-1.16095	0.114761	4.43921e-25	1.56854e-24	0.673592	0.128613	3.79156e-08	9.18476e-08	-1.84906	0.173342	6.5972e-28	1.70337e-26
YDR260C	SWM1	5.22499	-0.584666	0.155707	9.07007e-05	0.000140497	-0.590785	0.180862	0.000321566	0.000556589	0.0287373	0.199493	0.860865	0.902111
YDR261C	EXG2	48.6521	2.3508	0.0752413	9.42848e-217	8.31749e-215	1.81674	0.0820444	1.33996e-110	9.21094e-109	0.485469	0.108255	1.79876e-06	7.75312e-06
YDR262W	YDR262W	24.97	0.993717	0.0826417	4.41323e-34	1.99993e-33	0.609643	0.0917559	9.18876e-12	2.83262e-11	0.336132	0.118108	0.00223697	0.00551738
YDR263C	DIN7	12.2796	0.804165	0.12206	1.33852e-11	2.913e-11	0.521984	0.137239	5.44611e-05	0.000101465	0.208387	0.165256	0.147996	0.221158
YDR264C	AKR1	58.7807	0.238776	0.0581948	3.63365e-05	5.7826e-05	-0.288501	0.0642794	5.05668e-06	1.033e-05	0.508279	0.0859265	7.31138e-10	4.84952e-09
YDR265W	PEX10	12.8787	0.582067	0.116927	3.45159e-07	6.12035e-07	0.66771	0.132202	1.04378e-07	2.46971e-07	-0.0828906	0.158124	0.553789	0.646277
YDR266C	HEL2	46.1233	0.818825	0.0648711	4.65409e-37	2.29796e-36	0.973854	0.0717624	4.45558e-43	5.80872e-42	-0.147257	0.0930961	0.0994575	0.157944
YDR267C	CIA1	51.1839	-0.89731	0.0544705	1.309e-61	1.04502e-60	-0.78521	0.0610865	1.26371e-38	1.35951e-37	-0.102561	0.0795742	0.183789	0.264275
YDR268W	MSW1	16.3386	-0.236926	0.0932725	0.00983984	0.0128885	0.157507	0.103188	0.112255	0.140068	-0.354967	0.133873	0.00378771	0.00883966
YDR269C	YDR269C
YDR270W	CCC2	19.7181	0.333248	0.0974438	0.000506905	0.000739336	-0.290938	0.107015	0.004564	0.00694972	0.570203	0.143124	9.08491e-06	3.47697e-05
YDR271C	YDR271C
YDR272W	GLO2	39.7658	1.84445	0.0738694	1.3889e-139	4.29909e-138	2.22155	0.0852125	2.516e-152	3.91682e-150	-0.342858	0.10807	0.000765334	0.00208488
YDR273W	DON1	6.9567	-0.388952	0.138914	0.00380042	0.00515785	-0.773717	0.162919	3.17346e-07	7.20289e-07	0.311598	0.189993	0.0486219	0.0854256
YDR274C	YDR274C
YDR275W	BSC2	26.062	-0.150616	0.0866326	0.077741	0.0932012	-0.765026	0.0994571	2.40909e-15	9.26726e-15	0.567212	0.129641	1.75688e-06	7.59737e-06
YDR276C	PMP3	426.581	-0.0235768	0.0473185	0.616694	0.647394	0.627859	0.0500037	1.06465e-36	1.06727e-35	-0.637999	0.0688168	2.04114e-21	3.40813e-20
YDR277C	MTH1	15.1706	-0.533946	0.116594	2.76557e-06	4.66629e-06	0.014292	0.122071	0.901885	0.918192	-0.467037	0.164046	0.00108617	0.0028731
YDR278C	YDR278C
YDR279W	RNH202	9.90264	0.300768	0.112009	0.0060426	0.00804616	0.249308	0.125304	0.0352504	0.0478166	0.0317023	0.153647	0.81726	0.866706
YDR280W	RRP45	79.0779	0.103389	0.0444768	0.0195713	0.0249797	0.146094	0.0497859	0.00303402	0.00472604	-0.0427101	0.0657842	0.507678	0.604124
YDR281C	PHM6	5.99631	4.08409	0.275754	4.34663e-51	2.8651e-50	1.29364	0.325864	1.74606e-06	3.71012e-06	2.33772	0.434567	5.85736e-10	3.92443e-09
YDR282C	MRX10	12.811	-1.11311	0.11496	3.97499e-23	1.3117e-22	-1.41889	0.132029	1.34205e-28	9.7575e-28	0.251788	0.157703	0.0704996	0.117789
YDR283C	GCN2	63.0916	-0.313336	0.0531004	3.02958e-09	5.97227e-09	-1.0391	0.060921	1.86678e-66	4.81994e-65	0.704962	0.0808675	1.30074e-19	1.91778e-18
YDR284C	DPP1	45.1202	0.411943	0.0579522	8.75885e-13	2.00175e-12	0.0383676	0.0650604	0.549011	0.596574	0.353825	0.0859105	1.83631e-05	6.69854e-05
YDR285W	ZIP1	4.23096	0.610664	0.17029	0.000164259	0.000249119	-0.0215655	0.178862	0.893725	0.91186	0.46546	0.234205	0.00950953	0.0201565
YDR286C	MGP12	27.4446	-0.920692	0.0793159	7.96223e-32	3.39598e-31	-0.0932315	0.087007	0.270328	0.314347	-0.777527	0.120506	3.09636e-12	2.58502e-11
YDR287W	INM2	14.2727	-0.616072	0.0977215	1.45268e-10	3.03196e-10	-0.552479	0.112806	3.45399e-07	7.80947e-07	-0.0421274	0.137582	0.736987	0.806132
YDR288W	NSE3	26.8933	-0.677193	0.0732069	9.74242e-21	2.99806e-20	-0.528393	0.0823446	5.46938e-11	1.60741e-10	-0.129059	0.105313	0.19676	0.27945
YDR289C	RTT103	30.2852	-0.637227	0.066984	8.9203e-22	2.8205e-21	-0.785714	0.0765372	1.54813e-25	9.80171e-25	0.142269	0.0976499	0.127017	0.194139
YDR290W	YDR290W
YDR291W	HRQ1	20.3825	0.643127	0.0819149	1.9507e-15	4.97833e-15	0.483041	0.0918447	6.39776e-08	1.52675e-07	0.135127	0.116529	0.216683	0.302295
YDR292C	SRP101	69.1079	0.12722	0.0489461	0.00898885	0.011806	-0.248599	0.0542944	3.57889e-06	7.41992e-06	0.365168	0.0722063	1.98208e-07	9.86013e-07
YDR293C	SSD1	56.007	-0.326345	0.0615179	9.30213e-08	1.70191e-07	-0.481007	0.0678477	6.09359e-13	2.02469e-12	0.149371	0.0888429	0.0806816	0.132624
YDR294C	DPL1	79.6445	0.630126	0.0496051	2.80727e-37	1.40178e-36	0.307793	0.0549497	1.4389e-08	3.61981e-08	0.306953	0.0728505	1.52878e-05	5.65863e-05
YDR295C	HDA2	20.0575	0.341584	0.0876065	7.77028e-05	0.000120823	0.219833	0.0973422	0.0192091	0.0270423	0.100939	0.123872	0.379269	0.477879
YDR296W	MHR1	77.7864	-0.683308	0.0573577	4.35359e-33	1.9171e-32	0.0220661	0.0616785	0.716642	0.754713	-0.682012	0.0848078	6.83361e-17	8.14647e-16
YDR297W	SUR2	66.2984	1.04367	0.0599893	1.22052e-68	1.09868e-67	0.131726	0.0644725	0.0377977	0.0510496	0.885238	0.0897494	6.68287e-25	1.40367e-23
YDR298C	ATP5	141.089	-1.8798	0.0676911	9.42517e-172	4.53522e-170	-0.973459	0.0717928	5.20278e-43	6.71666e-42	-0.864405	0.0998385	6.99652e-20	1.05206e-18
YDR299W	BFR2	61.0949	-0.142913	0.0547275	0.00859455	0.0113021	0.0722408	0.0599641	0.221868	0.262483	-0.206425	0.0797387	0.00769718	0.0167521
YDR300C	PRO1	45.4421	0.0629008	0.0604191	0.294284	0.327305	0.0327246	0.066226	0.615402	0.659778	0.0278943	0.0875191	0.741387	0.809105
YDR301W	CFT1	42.8738	0.546997	0.0558573	7.15123e-23	2.35102e-22	-0.295488	0.0629912	1.88703e-06	3.99842e-06	0.825069	0.0852361	6.01012e-24	1.21883e-22
YDR302W	GPI11	43.4869	-0.470821	0.060468	4.69555e-15	1.17678e-14	-0.378067	0.0678187	1.43484e-08	3.61132e-08	-0.0827859	0.0881017	0.329729	0.428598
YDR303C	RSC3	33.6585	0.610669	0.0727416	2.38706e-17	6.60466e-17	0.185342	0.0790338	0.0162394	0.0230258	0.389736	0.104968	8.43897e-05	0.000277094
YDR304C	CPR5	217.012	0.377627	0.0351354	4.7646e-27	1.80652e-26	0.00705856	0.0381605	0.852432	0.876442	0.363708	0.0516181	9.62022e-13	8.40261e-12
YDR305C	HNT2	29.4541	-0.648964	0.0702826	1.22452e-20	3.74646e-20	-0.187106	0.0785562	0.0146684	0.0209102	-0.425131	0.103412	1.47549e-05	5.47284e-05
YDR306C	PFU1	11.1247	-0.209693	0.116691	0.0654838	0.0791518	-0.433037	0.130252	0.000435492	0.000743089	0.195839	0.159459	0.163962	0.240668
YDR307W	PMT7	24.2432	0.36348	0.0780509	2.52823e-06	4.27675e-06	-0.378802	0.0871762	7.98197e-06	1.60033e-05	0.70665	0.117979	1.05891e-10	7.64642e-10
YDR308C	SRB7	33.1511	-0.30076	0.0679644	8.12988e-06	1.34222e-05	-0.232517	0.0756324	0.00166074	0.00266858	-0.0587766	0.0980951	0.530996	0.626416
YDR309C	GIC2	28.2029	1.26072	0.089337	2.19819e-46	1.32972e-45	0.659882	0.098426	5.06904e-12	1.58948e-11	0.528412	0.129399	8.07765e-06	3.12095e-05
YDR310C	SUM1	61.963	0.780721	0.065602	3.84087e-33	1.69833e-32	0.455956	0.0712203	7.37869e-11	2.14944e-10	0.298539	0.094074	0.000916959	0.00246369
YDR311W	TFB1	35.7039	0.102652	0.0642843	0.107329	0.126608	-0.173289	0.0712528	0.0130755	0.0187304	0.262247	0.0936572	0.00343528	0.0080993
YDR312W	SSF2	84.1329	0.614677	0.0484323	3.36816e-37	1.67553e-36	0.890248	0.0536582	8.23166e-63	1.96262e-61	-0.266793	0.0709314	0.000114609	0.000367207
YDR313C	PIB1	11.1679	0.0663648	0.114537	0.553044	0.586508	0.462845	0.129433	0.000158558	0.000282957	-0.344029	0.161338	0.015175	0.0306759
YDR314C	RAD34	1.22054	2.03108	0.32077	1.45118e-12	3.27692e-12	0.420523	0.299921	0.0729117	0.0936475	0.95358	0.506346	0.000573718	0.00160927
YDR315C	IPK1	12.8988	-1.57121	0.107881	1.15447e-49	7.32685e-49	-1.24413	0.126379	2.32189e-24	1.39975e-23	-0.256167	0.150879	0.0576616	0.0986115
YDR316W	OMS1	31.5575	-0.844378	0.0743227	1.76703e-30	7.2785e-30	0.220923	0.0804723	0.00485774	0.00737368	-1.0456	0.113502	1.04154e-22	1.93434e-21
YDR317W	HIM1	2.91405	-0.375346	0.226743	0.0712152	0.0856686	0.0260812	0.234216	0.895342	0.912821	-0.237263	0.268692	0.196113	0.278887
YDR318W	MCM21	11.1883	-0.666917	0.110912	8.03697e-10	1.62993e-09	-0.618809	0.125313	2.23699e-07	5.15023e-07	-0.026022	0.151196	0.847274	0.891575
YDR319C	YFT2	19.7115	-0.19165	0.0900637	0.0306935	0.038425	-0.259599	0.100202	0.00712505	0.0105876	0.066957	0.126819	0.567872	0.660459
YDR320C	SWA2	24.6975	0.836137	0.0837956	5.24399e-24	1.78843e-23	0.562801	0.0925081	4.12283e-10	1.14552e-09	0.235701	0.118434	0.0333244	0.0616951
YDR321W	ASP1	146.558	0.160689	0.0320176	4.90553e-07	8.61479e-07	0.256469	0.0360215	8.14824e-13	2.69554e-12	-0.0951618	0.0477855	0.0443845	0.0791268
YDR322W	MRPL35	78.1147	-1.10307	0.0571127	4.78782e-84	5.78583e-83	-0.257875	0.061521	2.07793e-05	4.01258e-05	-0.817637	0.0848601	1.16519e-23	2.30125e-22
YDR323C	PEP7	6.99216	-0.554215	0.142512	5.659e-05	8.88025e-05	-0.0383395	0.15255	0.786	0.816866	-0.39859	0.196269	0.0140375	0.0285622
YDR324C	UTP4	167.298	-0.867955	0.0394562	7.60993e-108	1.47543e-106	-0.894273	0.0429805	3.79673e-97	1.91391e-95	0.0269943	0.0574691	0.633428	0.718238
YDR325W	YCG1	33.1048	-1.09462	0.0738049	1.09935e-50	7.15729e-50	-1.28982	0.0839519	8.41221e-55	1.61325e-53	0.179935	0.106273	0.0728892	0.12136
YDR326C	YSP2	42.0488	0.742697	0.0809678	1.67999e-20	5.11928e-20	-0.108445	0.0858251	0.193885	0.232179	0.811939	0.121249	3.46491e-13	3.14576e-12
YDR327W	YDR327W
YDR328C	SKP1	196.682	0.16722	0.038982	1.68046e-05	2.72342e-05	0.0676894	0.0423102	0.107148	0.134201	0.096557	0.0569387	0.085196	0.139212
YDR329C	PEX3	35.8477	0.20841	0.0617286	0.000669771	0.00096439	-0.144246	0.0695998	0.0346412	0.0470867	0.335563	0.0912857	0.000125026	0.000398173
YDR330W	UBX5	18.4269	0.0844074	0.0860713	0.319916	0.354028	0.0172395	0.0953041	0.851726	0.875886	0.0591921	0.122472	0.603707	0.69285
YDR331W	GPI8	50.5759	-0.796123	0.0731885	4.60542e-28	1.79107e-27	-0.531851	0.0791024	6.91855e-12	2.15032e-11	-0.23662	0.103583	0.016052	0.0322099
YDR332W	IRC3	11.8582	0.399623	0.10681	0.000136073	0.0002081	0.585228	0.120284	3.64151e-07	8.20935e-07	-0.167276	0.147577	0.207268	0.291309
YDR333C	RQC1	43.1752	-0.51178	0.0663205	7.5365e-15	1.87105e-14	-0.687451	0.0735277	2.01422e-21	1.06188e-20	0.167762	0.0954497	0.0658757	0.110762
YDR334W	SWR1	58.0326	0.490484	0.0521716	3.54975e-21	1.10783e-20	0.326125	0.0579486	1.18647e-08	3.01199e-08	0.153845	0.0762927	0.0378993	0.0687932
YDR335W	MSN5	90.5163	0.299232	0.0429016	2.60513e-12	5.82058e-12	-0.10941	0.047804	0.0209005	0.0292352	0.398756	0.0637864	1.6607e-10	1.17672e-09
YDR336W	MRX8	16.3282	1.13759	0.0965096	4.67632e-33	2.05409e-32	0.922316	0.110719	7.19052e-18	3.14281e-17	0.17256	0.135302	0.163409	0.240124
YDR337W	MRPS28	38.4074	-1.74523	0.0778604	3.97408e-113	8.31416e-112	-0.485859	0.0835472	2.67375e-09	7.10448e-09	-1.22351	0.117398	8.57472e-28	2.19256e-26
YDR338C	YDR338C	17.4226	-0.186381	0.0930245	0.0416813	0.0513785	-0.262944	0.103159	0.00798195	0.0117881	0.0743997	0.130325	0.534917	0.630161
YDR339C	FCF1	142.85	-0.632116	0.0400745	2.32397e-56	1.68504e-55	-0.0919259	0.0438568	0.0346725	0.0471144	-0.527887	0.0592819	1.19511e-19	1.76695e-18
YDR340W	YDR340W
YDR341C	YDR341C	263.27	0.0354895	0.0315499	0.259637	0.290541	-0.113298	0.0341627	0.000861424	0.00142263	0.147015	0.0462028	0.00131487	0.00340823
YDR342C	HXT7
YDR343C	HXT6
YDR344C	YDR344C
YDR345C	HXT3	713.955	0.230031	0.0502232	4.17231e-06	6.9864e-06	-0.00578547	0.0521483	0.910743	0.924897	0.227211	0.0713897	0.00110709	0.00291969
YDR346C	SVF1	139.754	0.140135	0.0388183	0.000292474	0.000436198	0.0206173	0.0423271	0.623795	0.667829	0.116476	0.0568683	0.0374655	0.0680993
YDR347W	MRP1	74.2162	-0.993689	0.0594566	1.77071e-63	1.47133e-62	0.020806	0.0632073	0.738247	0.774845	-0.995977	0.0889524	1.8746e-31	6.36043e-30
YDR348C	PAL1	55.2553	0.287824	0.0551712	1.55863e-07	2.82046e-07	0.00289674	0.0605824	0.961331	0.966994	0.271586	0.0806462	0.000507922	0.00144307
YDR349C	YPS7	85.3935	-0.0504119	0.0430017	0.239248	0.269549	-0.277934	0.0477298	4.16614e-09	1.09003e-08	0.222633	0.063415	0.000344836	0.00101872
YDR350C	ATP22	16.0874	0.622746	0.0976846	9.03842e-11	1.89994e-10	0.592351	0.109515	1.99535e-08	4.95142e-08	0.0154466	0.135467	0.900709	0.933659
YDR351W	SBE2	40.2139	-0.0439973	0.0646426	0.492543	0.526672	-0.190154	0.0714868	0.0066296	0.00988742	0.13996	0.0936222	0.118604	0.182968
YDR352W	YPQ2	80.3612	-0.553641	0.0449543	4.36075e-35	2.02647e-34	-0.664854	0.0499588	5.23987e-41	6.26064e-40	0.109632	0.065998	0.089746	0.14509
YDR353W	TRR1	326.127	0.780548	0.0357862	5.9643e-106	1.09997e-104	0.1094	0.0382616	0.00402401	0.00615937	0.66092	0.0524715	1.93453e-37	8.67753e-36
YDR354W	TRP4	68.9585	1.09646	0.0554856	7.67385e-88	1.02054e-86	0.842769	0.0614304	9.57089e-44	1.27926e-42	0.236616	0.0806276	0.00242165	0.00592868
YDR355C	YDR355C
YDR356W	SPC110	19.9965	-0.0190633	0.0865946	0.823342	0.841303	-0.288188	0.0969088	0.00206341	0.00327631	0.247297	0.123959	0.0314102	0.0584167
YDR357C	CNL1	25.8584	1.60007	0.0998896	2.11427e-59	1.63132e-58	2.11328	0.113661	1.67789e-79	5.65672e-78	-0.439713	0.142923	0.000660409	0.00182726
YDR358W	GGA1	13.8483	1.20924	0.109685	2.34764e-29	9.40655e-29	1.1564	0.126676	2.80943e-21	1.46506e-20	0.0328522	0.149812	0.806457	0.858201
YDR359C	EAF1	17.613	0.406579	0.10007	3.58131e-05	5.7096e-05	0.575928	0.111022	7.06268e-08	1.68391e-07	-0.154874	0.138473	0.220077	0.306383
YDR360W	OPI7
YDR361C	BCP1	80.6364	-0.0440263	0.0506937	0.382632	0.417748	0.0728586	0.0553577	0.18289	0.219959	-0.113164	0.0738289	0.11613	0.179822
YDR362C	TFC6	21.3343	0.34096	0.0839857	3.96108e-05	6.28101e-05	0.574387	0.0935253	2.76527e-10	7.75653e-10	-0.216214	0.119281	0.052025	0.0904627
YDR363W	ESC2	4.77654	-0.449335	0.191512	0.0125379	0.0162854	-0.283785	0.199296	0.106322	0.133262	-0.0878933	0.226327	0.613174	0.700978
YDR364C	CDC40	21.2263	-1.91132	0.0956036	5.58308e-91	8.03023e-90	-2.2126	0.110056	2.23526e-92	1.03783e-90	0.258124	0.134904	0.0362171	0.0662853
YDR365C	ESF1	177.492	0.722311	0.0403527	4.59018e-72	4.45795e-71	0.50444	0.0435949	2.49379e-31	2.03384e-30	0.210114	0.0586443	0.000271413	0.000815317
YDR366C	YDR366C
YDR367W	KEI1	76.0216	-0.60323	0.0463168	4.68841e-39	2.44973e-38	-0.559394	0.0514915	6.27306e-28	4.41534e-27	-0.0395688	0.0679313	0.552472	0.64543
YDR368W	YPR1	119.354	0.285062	0.0432614	3.80587e-11	8.14906e-11	0.430971	0.0479576	1.32043e-19	6.29645e-19	-0.143448	0.0635964	0.0214439	0.041637
YDR369C	XRS2	12.5762	-0.417203	0.101499	2.87399e-05	4.60134e-05	-0.166182	0.111164	0.11773	0.14622	-0.207947	0.141426	0.10455	0.164738
YDR370C	DXO1	32.6033	-0.764144	0.0752741	1.12028e-24	3.90363e-24	-0.54722	0.0836224	2.2251e-11	6.68794e-11	-0.190465	0.107538	0.060501	0.102724
YDR371W	CTS2	22.0953	-0.602198	0.0781883	6.99504e-15	1.73744e-14	-0.81786	0.0892502	6.76447e-21	3.44604e-20	0.200727	0.112671	0.0574124	0.0982806
YDR372C	VPS74	65.1594	-0.300382	0.0479661	3.21827e-10	6.62813e-10	-0.326717	0.0539708	9.2042e-10	2.51772e-09	0.0279579	0.0707909	0.685711	0.761853
YDR373W	FRQ1	85.2274	-0.366184	0.0454054	5.82467e-16	1.52699e-15	-0.152897	0.0502403	0.00210578	0.00334009	-0.204466	0.0667915	0.00178531	0.00450197
YDR374C	PHO92	5.22086	-2.66709	0.235067	2.20885e-32	9.55964e-32	-2.48538	0.270325	7.06911e-23	3.98475e-22	-0.0807271	0.250243	0.662973	0.743061
YDR375C	BCS1	24.766	-0.137447	0.0788434	0.0776055	0.093071	0.5085	0.0874296	2.4954e-09	6.6406e-09	-0.609715	0.117129	2.09482e-08	1.19353e-07
YDR376W	ARH1	35.2772	0.205155	0.064158	0.00126557	0.00177872	0.0322709	0.070797	0.642313	0.685297	0.16107	0.0931141	0.0712799	0.118942
YDR377W	ATP17	130.497	-1.41055	0.0749755	2.45529e-80	2.77098e-79	-0.382843	0.0787711	6.68604e-07	1.47578e-06	-0.986264	0.111836	7.03219e-21	1.12451e-19
YDR378C	LSM6	236.167	0.649179	0.035217	3.32186e-76	3.53064e-75	0.665136	0.0384432	1.1522e-67	3.0801e-66	-0.0169841	0.0515419	0.73877	0.807349
YDR379W	RGA2	21.2276	-0.0385811	0.0828067	0.636929	0.666653	-0.0830276	0.0913337	0.34849	0.394445	0.0424617	0.117866	0.699586	0.773696
YDR380W	ARO10	45.2865	-0.91508	0.11085	3.24839e-17	8.94111e-17	0.140361	0.114694	0.199323	0.237991	-1.00344	0.171344	2.36083e-11	1.81362e-10
YDR381W	YRA1
YDR382W	RPP2B	1974.44	-0.779183	0.0342593	5.48622e-115	1.17091e-113	-0.165024	0.0357392	3.44655e-06	7.16801e-06	-0.6049	0.049485	3.6454e-35	1.47291e-33
YDR383C	NKP1	41.1958	-0.2901	0.0871792	0.000742745	0.00106512	0.017994	0.0924658	0.840913	0.866224	-0.276939	0.122436	0.015029	0.03042
YDR384C	ATO3	116.779	-0.212244	0.0538199	7.30069e-05	0.000113655	-0.4473	0.057788	4.91189e-15	1.8544e-14	0.227347	0.0773302	0.00248251	0.00606084
YDR385W	EFT2	1790.82	-0.0690092	0.0314203	0.0277328	0.0349167	-0.219495	0.0328949	2.03737e-11	6.13414e-11	0.148919	0.0451741	0.000870901	0.00235308
YDR386W	MUS81	11.2938	-0.649761	0.116016	9.81879e-09	1.88164e-08	-0.68412	0.131273	4.18594e-08	1.00985e-07	0.0415551	0.156817	0.76541	0.826462
YDR387C	CIN10	10.7629	-0.522728	0.10366	2.80076e-07	5.01163e-07	-1.21753	0.124675	5.42999e-24	3.21847e-23	0.612488	0.158654	9.96986e-06	3.80191e-05
YDR388W	RVS167	131.085	1.1543	0.0402123	3.25258e-182	1.83148e-180	0.611559	0.0447516	5.01763e-43	6.49348e-42	0.52754	0.0598251	2.49095e-19	3.5538e-18
YDR389W	SAC7	30.5952	-0.563797	0.0661622	8.97423e-18	2.51326e-17	-0.943823	0.0757271	9.79024e-37	9.83297e-36	0.357724	0.09757	0.000116576	0.000373284
YDR390C	UBA2	49.5814	0.475466	0.0580077	1.67064e-16	4.48867e-16	0.527409	0.06539	2.91119e-16	1.17805e-15	-0.0531038	0.0848546	0.517368	0.613447
YDR391C	YDR391C	20.0407	-0.621958	0.0987695	1.50132e-10	3.131e-10	-0.644391	0.111825	2.17477e-09	5.81661e-09	0.0299874	0.137294	0.810697	0.861651
YDR392W	SPT3	24.7377	-0.412858	0.073294	1.31285e-08	2.50501e-08	-0.37594	0.0836264	4.01402e-06	8.28959e-06	-0.0271937	0.106254	0.786842	0.843068
YDR393W	SHE9	19.5318	0.54328	0.0900969	9.66756e-10	1.95565e-09	0.7356	0.099864	3.28816e-14	1.17915e-13	-0.176412	0.12604	0.130289	0.198224
YDR394W	RPT3	154.119	0.28279	0.0416882	1.01262e-11	2.21387e-11	0.152964	0.0456998	0.000735373	0.00122285	0.124767	0.0610847	0.0375109	0.0681584
YDR395W	SXM1	117.282	0.31567	0.0421005	5.43059e-14	1.30182e-13	0.125444	0.0460308	0.00598251	0.00897697	0.183579	0.0616513	0.00240587	0.00589823
YDR396W	YDR396W
YDR397C	NCB2	168.276	0.661974	0.0372172	4.08166e-71	3.89968e-70	0.473702	0.0407206	1.31245e-31	1.08206e-30	0.182198	0.0545441	0.000707624	0.00194569
YDR398W	UTP5	201.51	-0.0576341	0.0365494	0.11379	0.133901	-0.0406436	0.039499	0.300551	0.346055	-0.0163744	0.0533403	0.755839	0.819677
YDR399W	HPT1	633.102	-0.0587417	0.0413562	0.154006	0.178253	0.138231	0.0433213	0.00130236	0.0021113	-0.192998	0.0592645	0.000932447	0.00250022
YDR400W	URH1	28.1345	0.819929	0.0972167	9.66233e-18	2.70168e-17	0.937313	0.106124	8.65772e-20	4.19646e-19	-0.107194	0.132722	0.3787	0.477593
YDR401W	YDR401W
YDR402C	DIT2	3.158	-0.0093879	0.198992	0.959824	0.965112	0.015741	0.207882	0.930987	0.942562	-0.0172167	0.236531	0.921969	0.949228
YDR403W	DIT1	1.19089	0.873513	0.343529	0.00229244	0.00316317	0.319566	0.330525	0.192323	0.23057	0.190593	0.327553	0.248072	0.33885
YDR404C	RPB7	118.46	-0.327263	0.0395152	1.0049e-16	2.72068e-16	-0.612285	0.0435513	2.08826e-45	2.95539e-44	0.279545	0.0581441	1.02446e-06	4.56821e-06
YDR405W	MRP20	51.8546	-0.345596	0.0621494	2.17184e-08	4.09094e-08	0.119823	0.0677655	0.0718179	0.0923548	-0.443809	0.090911	3.60499e-07	1.72837e-06
YDR406W	PDR15	12.3677	0.181299	0.167138	0.255181	0.285917	0.487808	0.177372	0.00243702	0.00384475	-0.237089	0.209761	0.157343	0.23263
YDR407C	TRS120	37.0816	0.586778	0.0570799	4.71399e-25	1.66452e-24	0.234491	0.0648623	0.000235673	0.000414286	0.330561	0.0847666	4.99487e-05	0.000170677
YDR408C	ADE8	134.202	0.642645	0.0475759	6.72353e-42	3.77388e-41	0.146274	0.05097	0.00372758	0.00573715	0.479698	0.0693052	1.20335e-12	1.04415e-11
YDR409W	SIZ1	20.4398	-0.0731626	0.0858843	0.38764	0.422699	-0.692434	0.0973984	2.58626e-13	8.76941e-13	0.574108	0.128081	9.6461e-07	4.32319e-06
YDR410C	STE14	23.9688	-0.41969	0.0849022	5.61285e-07	9.83085e-07	-1.14545	0.097062	1.63097e-33	1.44844e-32	0.671681	0.128421	1.09591e-08	6.48118e-08
YDR411C	DFM1	56.0773	-1.03601	0.0589482	5.5782e-70	5.1799e-69	-1.41803	0.0674841	1.14608e-99	6.25383e-98	0.360936	0.0873351	1.72202e-05	6.31648e-05
YDR412W	RRP17	146.164	-0.386522	0.0366951	4.70385e-26	1.72182e-25	-0.553615	0.0404116	3.83586e-43	5.02554e-42	0.164804	0.0539795	0.00195265	0.00488209
YDR413C	YDR413C
YDR414C	ERD1	35.7947	-0.327366	0.0670075	8.48707e-07	1.46948e-06	-0.547641	0.0745596	7.68637e-14	2.70146e-13	0.209663	0.0968504	0.0232637	0.0448253
YDR415C	YDR415C	25.4408	-0.454705	0.0730406	3.34349e-10	6.88335e-10	-0.628354	0.0825729	7.80709e-15	2.91623e-14	0.164883	0.105475	0.0988099	0.157069
YDR416W	SYF1	25.1451	0.0934342	0.0732573	0.197385	0.225309	-0.0637907	0.080681	0.417885	0.466343	0.14626	0.105404	0.143117	0.214716
YDR417C	YDR417C
YDR418W	RPL12B	2450	-0.493521	0.0245158	2.61459e-90	3.68059e-89	-0.225393	0.0257015	1.43808e-18	6.50021e-18	-0.265105	0.0353813	4.94615e-14	4.675e-13
YDR419W	RAD30	8.52025	-0.134352	0.149377	0.349866	0.384759	0.0729155	0.157438	0.615134	0.659624	-0.160106	0.193184	0.316976	0.414875
YDR420W	HKR1	47.6157	0.165492	0.0578941	0.00399816	0.00541372	-0.310792	0.0636547	7.03455e-07	1.55012e-06	0.458817	0.0849908	1.89898e-08	1.08663e-07
YDR421W	ARO80	14.6266	0.759853	0.106852	3.95766e-13	9.19171e-13	0.629335	0.120088	4.39725e-08	1.0589e-07	0.0957416	0.146374	0.466203	0.564283
YDR422C	SIP1	19.3569	0.930697	0.101947	1.40741e-20	4.2936e-20	0.775038	0.112349	8.35733e-13	2.76298e-12	0.121079	0.139059	0.338475	0.436644
YDR423C	CAD1	30.1306	-0.298776	0.0827702	0.000258133	0.000386724	-0.27945	0.0908319	0.00149777	0.0024155	-0.010953	0.116562	0.920136	0.948263
YDR424C	DYN2	57.5041	0.33622	0.05251	1.2479e-10	2.60867e-10	0.34266	0.0595018	5.31184e-09	1.37485e-08	-0.00942974	0.077487	0.900516	0.933659
YDR425W	SNX41	16.736	0.152817	0.0869428	0.0745045	0.0894831	-0.464604	0.100438	1.72245e-06	3.66289e-06	0.573143	0.131269	1.5994e-06	6.97331e-06
YDR426C	YDR426C
YDR427W	RPN9	192.605	-0.73874	0.0383379	3.62356e-83	4.27161e-82	-0.58936	0.04206	4.36482e-45	6.12811e-44	-0.143768	0.0561856	0.00943233	0.0200021
YDR428C	BNA7	30.8307	-0.368189	0.0749703	7.10262e-07	1.23828e-06	-0.145109	0.0818982	0.0690133	0.0890294	-0.200412	0.107156	0.0482406	0.0849426
YDR429C	TIF35	458.362	-0.256502	0.0280327	5.02226e-20	1.50526e-19	-0.0896703	0.0299775	0.00268115	0.00420778	-0.164353	0.040832	5.00657e-05	0.000170966
YDR430C	CYM1	68.1262	-1.37982	0.0578158	3.23751e-127	8.23852e-126	-1.01865	0.0632329	1.39742e-59	3.08189e-58	-0.337873	0.0835784	2.85918e-05	0.000101228
YDR431W	YDR431W
YDR432W	NPL3	291.531	-0.50963	0.0346669	4.06991e-49	2.56148e-48	-0.544312	0.0372064	7.03209e-49	1.13825e-47	0.0352185	0.0503249	0.479075	0.57608
YDR433W	YDR433W
YDR434W	GPI17	47.2387	0.224563	0.0546679	3.6003e-05	5.73641e-05	-0.0651492	0.06094	0.278171	0.322461	0.277474	0.080572	0.000372187	0.0010902
YDR435C	PPM1	27.1622	0.0953006	0.0779426	0.215971	0.244992	0.41451	0.0879468	1.28571e-06	2.76285e-06	-0.297348	0.113099	0.0051371	0.0116598
YDR436W	PPZ2	13.3111	-0.186528	0.112866	0.0907174	0.107927	-0.304732	0.12529	0.0101036	0.0147405	0.108678	0.154215	0.428063	0.526516
YDR437W	GPI19	0.146235	-0.129986	0.581642	0.684584	0.710909	-0.0377778	0.509927	0.874208	0.895526	-0.0200074	0.425172	1	1
YDR438W	THI74	6.19077	0.148183	0.151952	0.310133	0.343849	-0.0389924	0.16095	0.791963	0.821459	0.141143	0.195985	0.38169	0.480448
YDR439W	LRS4	18.5203	-0.241797	0.0860563	0.00438949	0.00591486	-0.191752	0.0954041	0.0374393	0.0505914	-0.0386454	0.12174	0.733164	0.802448
YDR440W	DOT1	27.4497	0.398928	0.0713162	1.67878e-08	3.18145e-08	-0.0722149	0.0793509	0.351425	0.397286	0.440759	0.105205	8.96932e-06	3.43521e-05
YDR441C	APT2	37.2763	0.0570848	0.0859695	0.500725	0.534558	1.964	0.0980416	2.12951e-91	9.5521e-90	-1.89247	0.130878	3.62341e-48	2.45881e-46
YDR442W	YDR442W
YDR443C	SSN2	3.3741	0.239147	0.199802	0.200519	0.22864	0.26309	0.212193	0.153682	0.187558	-0.0348874	0.235247	0.842918	0.888463
YDR444W	YDR444W	19.2486	-0.609908	0.0839676	1.92852e-13	4.52668e-13	-0.848614	0.0959254	1.07432e-19	5.16475e-19	0.219077	0.120277	0.0508224	0.0887212
YDR445C	YDR445C
YDR446W	ECM11	50.5166	-1.25523	0.113889	2.08534e-29	8.38096e-29	-0.190216	0.116441	0.0860543	0.10936	-0.981422	0.174065	1.11904e-10	8.01499e-10
YDR447C	RPS17B
YDR448W	ADA2	39.7402	-0.261994	0.0877534	0.00246221	0.00338682	2.13182	0.101645	4.98136e-100	2.74649e-98	-2.38676	0.134941	8.54668e-71	1.22264e-68
YDR449C	UTP6	174.822	0.0286392	0.0440617	0.514022	0.547539	1.0303	0.0486401	8.58808e-101	4.88782e-99	-0.992153	0.066343	1.05413e-52	8.58382e-51
YDR450W	RPS18A	2014.09	-0.075304	0.0305114	0.0133948	0.0173687	0.189097	0.0319457	2.765e-09	7.32857e-09	-0.261492	0.0439327	1.92415e-09	1.2197e-08
YDR451C	YHP1	17.8603	-0.202909	0.0937473	0.0277703	0.0349472	-0.520103	0.106392	4.00679e-07	9.00933e-07	0.287158	0.133887	0.0190305	0.0374873
YDR452W	PPN1	103.33	-0.353353	0.0441384	9.58194e-16	2.48249e-15	-0.781493	0.049007	4.74053e-58	9.91764e-57	0.417533	0.0652514	6.10126e-11	4.49777e-10
YDR453C	TSA2	35.2925	-1.80033	0.08031	3.18404e-113	6.71439e-112	-2.34565	0.0921113	1.04875e-145	1.50028e-143	0.492098	0.118243	7.61713e-06	2.96017e-05
YDR454C	GUK1	476.274	0.229874	0.0292569	3.5396e-15	8.91724e-15	0.299299	0.0313881	1.03051e-21	5.53193e-21	-0.0692642	0.0426074	0.10131	0.16052
YDR455C	YDR455C
YDR456W	NHX1	53.8121	1.30662	0.0543327	5.15182e-129	1.34993e-127	0.64415	0.0604671	4.59108e-27	3.09168e-26	0.632972	0.0809785	5.1135e-16	5.77095e-15
YDR457W	TOM1	69.4629	1.0217	0.0516368	5.96583e-88	7.95393e-87	0.320723	0.0567998	1.07699e-08	2.74458e-08	0.676425	0.0768287	8.44135e-20	1.25859e-18
YDR458C	HEH2	20.3994	0.415246	0.0858129	9.58966e-07	1.65336e-06	0.427478	0.0948883	3.3771e-06	7.0291e-06	-0.018574	0.120529	0.868511	0.907786
YDR459C	PFA5	20.2362	-0.504561	0.0807623	2.65773e-10	5.49936e-10	-0.640265	0.0921441	9.98242e-13	3.27366e-12	0.129194	0.115906	0.234053	0.322531
YDR460W	TFB3	37.101	-0.667346	0.0637244	5.1814e-26	1.89009e-25	-0.800428	0.0727046	5.00484e-29	3.6895e-28	0.128379	0.0931155	0.150649	0.224173
YDR461W	MFA1
YDR462W	MRPL28	94.4859	-1.78686	0.0572287	6.43437e-216	5.58313e-214	-1.22686	0.0623978	1.57714e-87	6.27653e-86	-0.530089	0.0835218	4.7215e-11	3.52481e-10
YDR463W	STP1	42.6249	0.410824	0.0633076	6.42818e-11	1.35934e-10	-0.100572	0.0698737	0.142448	0.174734	0.486847	0.0935243	4.66797e-08	2.56569e-07
YDR464W	SPP41	36.3777	0.307897	0.0660907	2.66923e-06	4.50805e-06	-0.123377	0.0732198	0.0853433	0.108535	0.407984	0.0970973	1.02095e-05	3.8877e-05
YDR465C	RMT2	125.353	-0.530758	0.0387718	7.20957e-43	4.10767e-42	-0.45187	0.0427446	1.99681e-26	1.31784e-25	-0.075072	0.0569588	0.180855	0.260765
YDR466W	PKH3	28.1307	0.331878	0.0689279	1.20558e-06	2.06911e-06	-0.0209982	0.0762609	0.778437	0.809961	0.328935	0.100647	0.000579385	0.00162344
YDR467C	YDR467C
YDR468C	TLG1	53.8007	-0.516761	0.0522138	2.69274e-23	8.98087e-23	-0.665859	0.0593983	9.10882e-30	6.95714e-29	0.145435	0.0771891	0.0524362	0.091088
YDR469W	SDC1	48.3856	-0.224394	0.059892	0.00016144	0.000245264	-0.105302	0.0665931	0.107661	0.13478	-0.110207	0.0873686	0.190281	0.272058
YDR470C	UGO1	25.2333	-1.38521	0.0742911	6.23405e-79	6.91758e-78	-0.947271	0.0831819	3.92425e-31	3.1567e-30	-0.393677	0.107601	0.000103446	0.000334476
YDR471W	RPL27B	1189.96	-0.227522	0.0328698	4.01616e-12	8.91302e-12	0.0680299	0.0344059	0.0469697	0.0626223	-0.291249	0.0473216	5.04768e-10	3.39484e-09
YDR472W	TRS31	36.1672	-0.0210433	0.0625132	0.734441	0.759108	-0.152947	0.0696904	0.0252655	0.0349957	0.12654	0.0911511	0.149015	0.222241
YDR473C	PRP3	17.5942	-0.740461	0.091771	2.59915e-16	6.93062e-16	-0.609599	0.103115	1.01009e-09	2.75731e-09	-0.103772	0.128596	0.381505	0.48033
YDR475C	JIP4	15.4838	-0.00672422	0.0957049	0.94304	0.950402	-0.458494	0.107853	9.92562e-06	1.96692e-05	0.408355	0.138435	0.0011156	0.00293775
YDR476C	YDR476C	57.582	-0.00554911	0.059681	0.925398	0.93565	-0.397059	0.0662372	1.132e-09	3.07738e-09	0.375384	0.0875501	8.31327e-06	3.19582e-05
YDR477W	SNF1	61.5913	-0.313879	0.0532966	3.24702e-09	6.38902e-09	-0.230681	0.0586733	6.67928e-05	0.000123398	-0.0765921	0.0775184	0.308781	0.406461
YDR478W	SNM1	16.3896	-0.117714	0.0933853	0.200012	0.228161	-0.278229	0.105097	0.00580496	0.00873137	0.148055	0.132142	0.222608	0.309368
YDR479C	PEX29	21.9725	0.70239	0.0839583	2.42408e-17	6.70359e-17	0.305501	0.0940825	0.000788064	0.00130759	0.348636	0.121224	0.00194478	0.0048647
YDR480W	DIG2	24.3694	0.336873	0.0719201	2.2882e-06	3.88437e-06	0.187721	0.0818328	0.0185253	0.0261478	0.131956	0.104907	0.183716	0.264241
YDR481C	PHO8	64.8258	1.40462	0.0684849	7.5305e-95	1.15869e-93	-0.203668	0.0740535	0.00493739	0.00748814	1.60694	0.101733	1.90433e-57	1.73786e-55
YDR482C	CWC21	31.6526	-0.349041	0.069961	4.87284e-07	8.56022e-07	-0.65348	0.0792525	4.27132e-17	1.80288e-16	0.286907	0.102074	0.00314021	0.0074921
YDR483W	KRE2	131.967	0.779286	0.0430575	1.07831e-73	1.08939e-72	0.500754	0.0467697	4.11779e-27	2.79429e-26	0.267891	0.0627096	1.30491e-05	4.86745e-05
YDR484W	VPS52	18.7123	-0.330319	0.0869154	0.000117663	0.000180886	-0.507386	0.0979296	9.08535e-08	2.15645e-07	0.165122	0.123472	0.149877	0.223276
YDR485C	VPS72	29.319	-0.0978362	0.0733624	0.177692	0.203842	-0.230555	0.0813311	0.00361983	0.00557944	0.126361	0.105347	0.204908	0.288692
YDR486C	VPS60	38.2364	-0.930568	0.0692411	7.29501e-42	4.0903e-41	-0.810508	0.0774131	1.65412e-26	1.09578e-25	-0.104747	0.0993493	0.26996	0.363402
YDR487C	RIB3	139.031	-0.221152	0.040591	4.60131e-08	8.54852e-08	-0.114468	0.0443051	0.00920946	0.013488	-0.102826	0.0593913	0.0785362	0.12958
YDR488C	PAC11	7.14093	-0.806299	0.152959	3.99451e-08	7.429e-08	-1.03017	0.175002	2.33174e-10	6.56485e-10	0.173886	0.19529	0.280224	0.375121
YDR489W	SLD5	14.2718	-0.804814	0.0896112	8.12988e-20	2.42704e-19	-0.737398	0.103352	1.79676e-13	6.16348e-13	-0.0484938	0.127106	0.679876	0.757437
YDR490C	PKH1	23.517	0.222361	0.0715048	0.00168719	0.00234822	-0.323765	0.0822552	5.38945e-05	0.000100516	0.516655	0.107547	3.217e-07	1.55503e-06
YDR491C	YDR491C
YDR492W	IZH1	40.133	0.359923	0.0747394	1.16176e-06	1.99455e-06	0.487635	0.082367	1.41513e-09	3.82352e-09	-0.122481	0.106352	0.225456	0.312878
YDR493W	MZM1	41.0666	-1.69271	0.0698198	1.27384e-131	3.47548e-130	-0.707723	0.076765	6.30689e-21	3.21913e-20	-0.940918	0.105905	4.70573e-21	7.64032e-20
YDR494W	RSM28	48.8766	-0.604265	0.0677727	2.51686e-19	7.42159e-19	0.550142	0.0737387	3.19298e-14	1.14579e-13	-1.14583	0.102836	2.4779e-31	8.30096e-30
YDR495C	VPS3	12.6277	0.0950923	0.102746	0.345315	0.380148	0.0267028	0.113205	0.805103	0.833773	0.0569916	0.143118	0.660123	0.740732
YDR496C	PUF6	160.518	-0.256229	0.037957	1.29957e-11	2.8307e-11	0.0439404	0.0411492	0.28242	0.326958	-0.293932	0.0555762	8.03019e-08	4.23767e-07
YDR497C	ITR1	157.649	0.919883	0.0444324	6.95919e-96	1.09303e-94	0.644705	0.048006	1.1039e-41	1.34942e-40	0.263837	0.064423	2.95031e-05	0.000103968
YDR498C	SEC20	27.3912	0.25237	0.0659891	0.000115416	0.000177639	-0.127509	0.0738513	0.0778043	0.099497	0.358882	0.0971342	0.00010811	0.00034892
YDR499W	LCD1	52.3953	-0.276967	0.0862724	0.00113814	0.00160517	0.25655	0.0918504	0.00391249	0.00599734	-0.49417	0.123638	1.59905e-05	5.90633e-05
YDR500C	RPL37B
YDR501W	PLM2	16.9476	-0.601278	0.106033	7.36201e-09	1.42164e-08	-0.395803	0.11621	0.000359121	0.000617353	-0.161889	0.145059	0.214751	0.299835
YDR502C	SAM2	168.548	-0.541447	0.0528497	7.45355e-25	2.61269e-24	0.0718054	0.0555776	0.191019	0.229162	-0.595169	0.0767271	1.23476e-15	1.32077e-14
YDR503C	LPP1	28.0813	-0.602432	0.0788601	1.13915e-14	2.80966e-14	-0.499996	0.0888752	7.82167e-09	2.00582e-08	-0.084627	0.11273	0.424439	0.522941
YDR504C	SPG3
YDR505C	PSP1	4.252	1.03567	0.204353	5.57546e-08	1.02897e-07	1.4201	0.23875	5.2832e-11	1.55355e-10	-0.239055	0.242464	0.182307	0.2625
YDR506C	GMC1	0.681759	2.47445	0.439207	5.18013e-11	1.10469e-10	0.387362	0.366323	0.134068	0.165067	1.02485	0.671563	0.0153536	0.0309941
YDR507C	GIN4	57.0225	0.30229	0.0584913	1.99818e-07	3.59617e-07	0.0221266	0.0633283	0.722793	0.759981	0.265346	0.084669	0.00113547	0.00298711
YDR508C	GNP1	261.066	0.784462	0.0349244	3.20704e-112	6.5794e-111	0.746968	0.0375202	6.24774e-89	2.62454e-87	0.0354648	0.0506789	0.478442	0.575806
YDR509W	YDR509W
YDR510W	SMT3	289.055	-0.230112	0.0439817	1.50685e-07	2.72955e-07	-0.437345	0.0469436	6.13893e-21	3.13946e-20	0.202764	0.0634002	0.00112659	0.00296521
YDR511W	SDH7	33.5434	0.0931402	0.0750509	0.209528	0.237989	0.883515	0.0845569	1.54448e-26	1.02571e-25	-0.753775	0.114082	1.40541e-12	1.21154e-11
YDR512C	EMI1	42.6062	-0.243937	0.0751359	0.0010339	0.00146283	-0.314356	0.0827335	9.62754e-05	0.000175356	0.0697699	0.106896	0.491629	0.5878
YDR513W	GRX2	163.898	-0.521332	0.0442633	3.16006e-32	1.36541e-31	-0.492444	0.0484927	1.40002e-24	8.53723e-24	-0.0257008	0.0645411	0.68489	0.761226
YDR514C	YDR514C	37.1287	-1.37309	0.0706381	1.73922e-85	2.18663e-84	-1.16283	0.0792786	4.22629e-50	7.21604e-49	-0.187514	0.10141	0.0524683	0.0911137
YDR515W	SLF1	15.587	-0.771575	0.0970039	6.02695e-16	1.57924e-15	-0.124494	0.105698	0.219816	0.260287	-0.57302	0.142635	8.17642e-06	3.15436e-05
YDR516C	EMI2	31.5195	0.399771	0.0913774	9.0942e-06	1.49582e-05	-0.18811	0.0990794	0.0487864	0.0648158	0.539296	0.13324	8.76542e-06	3.36198e-05
YDR517W	GRH1	55.2896	0.429863	0.0565371	2.10006e-14	5.1295e-14	0.00527709	0.0625476	0.931765	0.943069	0.405014	0.083432	4.87275e-07	2.29054e-06
YDR518W	EUG1	43.7831	1.00555	0.0771201	1.18211e-39	6.28838e-39	0.108984	0.0823364	0.174412	0.210624	0.852643	0.116042	2.54115e-15	2.6425e-14
YDR519W	FPR2	82.0148	-0.403973	0.0515327	3.4258e-15	8.63877e-15	0.0307452	0.0564021	0.581108	0.627331	-0.418944	0.075781	1.31177e-08	7.67206e-08
YDR520C	URC2	11.332	-0.560147	0.109409	1.72821e-07	3.11879e-07	-0.708183	0.126278	4.19047e-09	1.09478e-08	0.135044	0.151473	0.318069	0.4161
YDR521W	YDR521W
YDR522C	SPS2	1.03992	-3.56313	0.38399	1.78822e-22	5.77488e-22	-1.63943	0.42655	1.13845e-06	2.45951e-06	-0.876199	0.572298	0.00457883	0.0105281
YDR523C	SPS1	1.64879	1.58015	0.384734	8.18267e-07	1.41771e-06	0.798786	0.387727	0.00459506	0.00699299	0.229486	0.338146	0.237308	0.326677
YDR524C	AGE1	16.6768	0.300771	0.0988631	0.00196431	0.0027246	0.767288	0.109295	3.63452e-13	1.22143e-12	-0.416382	0.14042	0.00106491	0.00281968
YDR525W	API2
YDR526C	YDR526C
YDR527W	RBA50	50.6442	-0.0806088	0.0580276	0.161883	0.186595	0.266397	0.0648239	2.92264e-05	5.5726e-05	-0.333309	0.0853903	5.31656e-05	0.000181318
YDR528W	HLR1	29.1135	0.826245	0.0789604	3.6041e-26	1.32384e-25	0.618952	0.0887767	9.13742e-13	3.01524e-12	0.178546	0.112831	0.0923795	0.148504
YDR529C	QCR7	328.609	-1.17479	0.0601669	6.1329e-86	7.80323e-85	0.172282	0.0626613	0.00521583	0.00789007	-1.34327	0.0881773	5.19153e-54	4.36171e-52
YDR530C	APA2	16.0881	1.46567	0.10573	3.69572e-45	2.19053e-44	1.16547	0.119739	8.61115e-24	5.05869e-23	0.239076	0.145766	0.068387	0.114587
YDR531W	CAB1	51.7512	-0.656905	0.0572519	8.21215e-31	3.41184e-30	-0.346685	0.0637347	3.31804e-08	8.097e-08	-0.290211	0.0837834	0.000347631	0.00102565
YDR532C	KRE28	12.5433	0.297237	0.117701	0.00965562	0.0126597	0.285716	0.12885	0.0186467	0.0262982	-0.00195438	0.158243	0.988833	0.998453
YDR533C	HSP31	25.2212	0.58359	0.113576	1.4871e-07	2.69563e-07	2.04071	0.129444	3.08383e-58	6.47728e-57	-1.40381	0.177879	2.78816e-17	3.42338e-16
YDR534C	FIT1	12.0477	0.152166	0.196484	0.408737	0.443966	-1.11039	0.223752	3.08709e-08	7.5543e-08	1.13109	0.342515	4.53889e-06	1.83252e-05
YDR535C	YDR535C
YDR536W	STL1	1.28532	-0.596533	0.288513	0.0178315	0.0228362	-0.509934	0.319193	0.0372868	0.0503982	0.00348235	0.291108	0.945088	0.967198
YDR537C	YDR537C
YDR538W	PAD1	48.4598	-1.52309	0.0632346	1.00687e-129	2.67808e-128	-1.04817	0.0696529	2.04238e-52	3.67698e-51	-0.44128	0.0919235	5.2618e-07	2.45381e-06
YDR539W	FDC1	47.5896	-1.77196	0.0694405	1.63346e-145	5.50694e-144	-1.45888	0.0774366	7.56777e-81	2.65273e-79	-0.283685	0.0999301	0.00284588	0.00686565
YDR540C	IRC4
YDR541C	YDR541C	11.3514	0.318928	0.118166	0.00567732	0.00758074	0.991133	0.140136	1.04389e-13	3.63509e-13	-0.57879	0.177348	0.000130318	0.000413086
YDR542W	PAU10
YDR543C	YDR543C
YDR544C	YDR544C
YDR545W	YRF1-1
YEL001C	IRC22	155.999	-0.589399	0.0361769	6.0821e-60	4.75518e-59	-0.658238	0.0401042	3.99331e-61	9.15003e-60	0.0687744	0.0533624	0.192027	0.273741
YEL002C	WBP1	143.379	-0.114295	0.0371125	0.00200825	0.0027841	-0.442655	0.0412936	4.15421e-27	2.81539e-26	0.322773	0.0550362	2.56039e-09	1.6057e-08
YEL003W	GIM4	156.599	-0.914325	0.044934	1.0486e-92	1.54603e-91	-0.446665	0.0486918	2.28721e-20	1.13673e-19	-0.451444	0.0656546	2.1842e-12	1.85868e-11
YEL004W	YEA4	15.6429	-0.0543566	0.0937626	0.555684	0.588836	-0.167409	0.104165	0.0942305	0.11915	0.104446	0.132158	0.38947	0.487805
YEL005C	VAB2	11.0787	-0.342042	0.115074	0.00235308	0.00324007	-0.258028	0.129055	0.0338332	0.0460831	-0.0569631	0.157378	0.682608	0.759368
YEL006W	YEA6	22.418	-1.41852	0.0857336	6.99832e-63	5.74296e-62	-1.40613	0.0975724	1.01264e-48	1.62915e-47	-0.00621371	0.120847	0.956029	0.975192
YEL007W	MIT1	63.0751	1.21669	0.0585227	4.26731e-97	6.88624e-96	0.846866	0.0636121	2.34689e-41	2.86223e-40	0.345631	0.0843744	2.11548e-05	7.62234e-05
YEL008W	YEL008W
YEL009C	GCN4	601.807	-0.32213	0.0521433	5.40049e-10	1.10409e-09	-0.0738664	0.0543252	0.169002	0.204603	-0.23736	0.0741582	0.00101675	0.00270843
YEL010W	YEL010W
YEL011W	GLC3	5.69374	0.139371	0.16839	0.385072	0.419985	0.911679	0.205139	7.89539e-07	1.72973e-06	-0.603199	0.255318	0.00140225	0.00361759
YEL012W	UBC8	40.9722	0.535974	0.0629987	1.07058e-17	2.9887e-17	0.781974	0.0722047	3.88673e-28	2.77257e-27	-0.234208	0.0927095	0.00829308	0.0178436
YEL013W	VAC8	21.7368	-0.881839	0.0969328	2.20976e-20	6.69888e-20	-0.544711	0.105697	9.3813e-08	2.2237e-07	-0.28172	0.134645	0.0220665	0.0427757
YEL014C	YEL014C
YEL015W	EDC3	60.3672	0.214934	0.0507442	2.06949e-05	3.34264e-05	0.182735	0.0567988	0.00111408	0.00182226	0.0285626	0.0746491	0.694353	0.769355
YEL016C	NPP2	29.5693	1.46571	0.0815446	1.07849e-73	1.08939e-72	0.772281	0.0911427	3.86414e-18	1.71011e-17	0.626988	0.120916	1.82783e-08	1.04818e-07
YEL017W	GTT3	77.0598	-0.309574	0.0488166	1.91396e-10	3.9759e-10	-0.708231	0.0542747	1.36583e-39	1.54803e-38	0.38681	0.0719852	3.28254e-08	1.83468e-07
YEL018W	EAF5	227.989	-0.861876	0.0876891	2.15847e-23	7.22631e-23	-0.231402	0.0906973	0.00844449	0.0124261	-0.571116	0.124848	7.13769e-07	3.25688e-06
YEL019C	MMS21	3.74676	-2.34606	0.220829	7.88628e-29	3.13144e-28	-2.10278	0.24881	1.2423e-19	5.9292e-19	-0.117048	0.241647	0.525102	0.620948
YEL020C	PXP1	15.6507	1.94468	0.101161	1.8602e-84	2.26345e-83	1.52017	0.114587	6.73412e-42	8.25085e-41	0.350815	0.142212	0.00624671	0.0138691
YEL021W	URA3	51.5714	-6.02574	0.0984313	0	0	-7.11796	0.166694	0	0	0.983048	0.206257	2.63869e-09	1.65285e-08
YEL022W	GEA2	61.3423	0.422945	0.0534191	1.78135e-15	4.55053e-15	-0.591939	0.0599045	1.64135e-23	9.52596e-23	1.00457	0.0816534	2.99318e-37	1.2986e-35
YEL023C	YEL023C	4.41829	0.476596	0.200291	0.0108827	0.0142017	1.40568	0.240511	1.01796e-10	2.92988e-10	-0.652417	0.302804	0.00163159	0.00414197
YEL024W	RIP1	24.8184	-1.95399	0.125073	3.90495e-57	2.8948e-56	0.466854	0.12964	0.000142364	0.000255174	-2.42924	0.18248	1.25714e-41	7.23266e-40
YEL025C	YEL025C	17.4274	1.03039	0.104885	1.30419e-23	4.38571e-23	0.905192	0.117938	1.5694e-15	6.0856e-15	0.0934221	0.14325	0.470404	0.568849
YEL026W	SNU13	1101.27	-0.600816	0.0376224	1.0984e-57	8.20008e-57	-0.151442	0.0392795	0.000104349	0.000189541	-0.439744	0.054128	1.73255e-16	2.01105e-15
YEL027W	VMA3	764.46	-0.0231125	0.0349946	0.50787	0.541421	0.193117	0.0368437	1.35213e-07	3.17096e-07	-0.213166	0.0504224	1.89254e-05	6.89417e-05
YEL028W	YEL028W
YEL029C	BUD16	24.284	-0.863209	0.0837979	1.77106e-25	6.35973e-25	-0.816133	0.0944708	7.69086e-19	3.52753e-18	-0.0339619	0.118347	0.759008	0.821896
YEL030W	ECM10	7.56263	0.426713	0.149912	0.00309813	0.00423075	1.26937	0.171345	3.74041e-15	1.42125e-14	-0.682955	0.226166	0.000127362	0.000404882
YEL031W	SPF1	203.563	0.403293	0.0359688	2.69232e-29	1.07795e-28	-0.264915	0.0390872	9.06092e-12	2.7981e-11	0.660366	0.0531591	1.35827e-36	5.75146e-35
YEL032W	MCM3	28.4952	-0.0627284	0.0761937	0.405077	0.440389	-0.133885	0.0839295	0.101249	0.127205	0.0682441	0.108961	0.507188	0.603794
YEL033W	MTC7
YEL034W	HYP2	3839.4	-0.982446	0.0319814	5.49168e-208	4.33843e-206	0.0899998	0.0332418	0.00653841	0.00977069	-1.06859	0.0464627	1.00403e-118	5.31433e-116
YEL035C	UTR5
YEL036C	ANP1	109.508	-0.472939	0.041329	1.73054e-30	7.13377e-30	-0.231231	0.0458777	3.68375e-07	8.30059e-07	-0.233134	0.06101	0.000100971	0.000326875
YEL037C	RAD23	173.496	-0.433371	0.0360196	1.7622e-33	7.85127e-33	-0.573982	0.0395904	4.38064e-48	6.88033e-47	0.138952	0.0529354	0.00781884	0.0169542
YEL038W	UTR4	70.282	0.0274565	0.0508039	0.586938	0.618684	0.426292	0.056975	3.80964e-14	1.35787e-13	-0.386624	0.0753397	1.29171e-07	6.64436e-07
YEL039C	CYC7	14.391	-1.6703	0.139668	1.01796e-34	4.68122e-34	0.258538	0.14543	0.0557443	0.0732872	-1.92481	0.206245	7.29954e-22	1.25852e-20
YEL040W	UTR2	386.985	-0.209266	0.041415	3.97058e-07	7.01244e-07	0.221778	0.043836	3.39366e-07	7.67963e-07	-0.422628	0.0598936	6.92156e-13	6.11616e-12
YEL041W	YEF1	0.325194	0.0778467	0.462612	0.809235	0.828167	-0.154876	0.430874	0.547081	0.594722	0.0908276	0.387677	0.379104	0.477876
YEL042W	GDA1	225.92	0.490255	0.0335481	1.52447e-48	9.5059e-48	0.178361	0.0363876	8.26181e-07	1.80851e-06	0.305437	0.0491719	3.16239e-10	2.17949e-09
YEL043W	YEL043W	89.4962	-0.148007	0.0466515	0.00143587	0.00201166	-0.374122	0.0513295	1.83655e-13	6.2959e-13	0.220492	0.0682508	0.000942468	0.00252581
YEL044W	IES6	98.303	-0.202973	0.0459648	9.21865e-06	1.51535e-05	-0.387404	0.0511139	1.9807e-14	7.20538e-14	0.180334	0.0675975	0.00646779	0.0143359
YEL045C	YEL045C
YEL046C	GLY1	18.2622	0.113572	0.102519	0.258632	0.289478	0.649615	0.113842	2.96867e-09	7.84011e-09	-0.479117	0.147648	0.000304118	0.000908408
YEL047C	FRD1	26.4108	0.386625	0.0914822	1.80999e-05	2.92885e-05	-0.168917	0.0990988	0.0769324	0.0985248	0.507641	0.132756	2.79636e-05	9.927e-05
YEL048C	TCA17	3.16083	-2.36158	0.248014	5.67311e-24	1.93229e-23	-1.47799	0.282677	2.78151e-09	7.36862e-09	-0.436774	0.299729	0.031028	0.0578279
YEL049W	PAU2
YEL050C	RML2	53.4474	-0.201915	0.0636972	0.00139615	0.00195757	0.767427	0.0699728	9.10079e-29	6.65338e-28	-0.951557	0.0965543	4.38668e-25	9.29211e-24
YEL051W	VMA8	217.525	0.015071	0.0362664	0.676894	0.703475	-0.157682	0.0393696	5.5522e-05	0.000103369	0.170124	0.0530645	0.00115624	0.0030357
YEL052W	AFG1	33.9099	1.31476	0.0651566	8.73662e-92	1.28097e-90	0.364426	0.0735477	4.30808e-07	9.67856e-07	0.912747	0.100266	5.91434e-22	1.02976e-20
YEL053C	MAK10	38.4744	0.198641	0.0627979	0.00143243	0.00200737	0.113506	0.0694889	0.0960316	0.121167	0.077537	0.091099	0.376251	0.475184
YEL054C	RPL12A	1385.2	-0.446329	0.0337867	5.45771e-40	2.9209e-39	-0.0364744	0.0352789	0.298839	0.344384	-0.403155	0.0486602	5.36038e-17	6.46298e-16
YEL055C	POL5	105.465	0.471066	0.0385043	1.39653e-34	6.39431e-34	0.49082	0.0428697	1.06438e-30	8.4086e-30	-0.0210356	0.0568661	0.70713	0.780314
YEL056W	HAT2	38.9638	0.631818	0.0616604	5.98738e-25	2.10993e-24	0.297702	0.0686522	9.9967e-06	1.97952e-05	0.310163	0.0900842	0.000336583	0.000997499
YEL057C	SDD1	3.03728	0.599976	0.227716	0.00404935	0.00547744	1.30196	0.276516	6.1778e-08	1.47559e-07	-0.422282	0.293014	0.0303061	0.0567021
YEL058W	PCM1	101.495	0.267384	0.0512083	1.54816e-07	2.80246e-07	0.766792	0.05627	4.62374e-43	6.01313e-42	-0.483869	0.0752694	3.67165e-11	2.77233e-10
YEL059W	HHY1
YEL060C	PRB1	52.9688	-1.1133	0.107321	3.6447e-26	1.33782e-25	-0.601655	0.114372	4.3619e-08	1.05087e-07	-0.425168	0.148501	0.00137297	0.00354922
YEL061C	CIN8	33.1665	1.02627	0.0656271	6.03841e-56	4.36034e-55	0.527552	0.0734127	2.64587e-13	8.96007e-13	0.461491	0.0965736	4.86565e-07	2.28923e-06
YEL062W	NPR2	13.4299	-0.910374	0.104468	6.36557e-19	1.85228e-18	-0.886903	0.120105	1.55953e-14	5.72045e-14	-0.00808413	0.144111	0.950314	0.971076
YEL063C	CAN1	69.5897	-0.249573	0.0678747	0.000208232	0.000313741	-0.135866	0.0727477	0.0565601	0.0742308	-0.102985	0.0963992	0.2638	0.356423
YEL064C	AVT2	6.43977	1.64371	0.160282	2.11713e-26	7.83087e-26	1.55452	0.185343	8.01495e-19	3.66982e-18	0.0469066	0.198735	0.771909	0.831613
YEL065W	SIT1	137.247	0.979878	0.085114	1.99095e-31	8.41031e-31	-0.511206	0.0900454	5.61712e-09	1.45031e-08	1.49459	0.125625	3.06771e-34	1.17662e-32
YEL066W	HPA3	50.3686	-0.754348	0.0767301	2.91636e-23	9.69008e-23	-0.587363	0.0845661	1.2313e-12	4.01702e-12	-0.144537	0.108757	0.159468	0.235181
YEL067C	YEL067C
YEL068C	YEL068C	16.4848	0.947267	0.101118	1.43024e-21	4.50879e-21	1.25931	0.116705	1.18455e-28	8.63615e-28	-0.268804	0.142323	0.0370508	0.0675078
YEL069C	HXT13
YEL070W	DSF1
YEL071W	DLD3	207.469	-0.404524	0.0646407	2.93071e-10	6.05238e-10	-0.479398	0.0682733	9.95875e-13	3.26793e-12	0.0738079	0.0909265	0.398702	0.497015
YEL072W	RMD6	14.8257	-1.38575	0.115441	1.51725e-34	6.93508e-34	-0.874323	0.128085	9.30878e-13	3.06414e-12	-0.407035	0.160042	0.00383388	0.00892773
YEL073C	YEL073C	7.23037	-5.32139	0.202914	9.28482e-153	3.58719e-151	-4.48101	0.22999	2.38833e-85	9.09456e-84	-0.536576	0.276363	0.0867664	0.141088
YEL074W	YEL074W
YEL075C	YEL075C
YEL076C	YEL076C
YEL077C	YEL077C
YER001W	MNN1	143.753	-1.0392	0.0591777	7.09561e-70	6.57742e-69	-0.97409	0.0635351	3.50688e-54	6.60566e-53	-0.058484	0.0840082	0.471127	0.569462
YER002W	NOP16	192.694	-0.794453	0.0381009	4.69053e-97	7.54619e-96	-0.563147	0.0414085	1.45942e-42	1.84802e-41	-0.223895	0.0556209	4.44912e-05	0.000152818
YER003C	PMI40	144.401	0.47801	0.0437479	5.81234e-28	2.25548e-27	0.272291	0.0476397	7.97454e-09	2.04403e-08	0.197355	0.063765	0.00157131	0.00400238
YER004W	FMP52	45.9341	-0.902393	0.0735822	3.19147e-35	1.49095e-34	-0.562045	0.0807795	1.22927e-12	4.01388e-12	-0.30556	0.105299	0.00221766	0.00547485
YER005W	YND1	21.6795	0.195873	0.0785598	0.0116264	0.0151349	0.424884	0.0892655	9.95841e-07	2.16024e-06	-0.214237	0.113599	0.044683	0.0795248
YER006W	NUG1	157.089	-0.280953	0.0371399	3.36237e-14	8.11538e-14	-0.280831	0.0404999	2.932e-12	9.31518e-12	0.00128235	0.0543234	0.980909	0.993295
YER007W	PAC2	10.3255	-0.279153	0.12297	0.019715	0.0251509	0.0954143	0.132844	0.445211	0.494045	-0.311568	0.169431	0.033913	0.0625876
YER008C	SEC3	69.3909	0.6366	0.0516416	3.13036e-35	1.46369e-34	0.252236	0.0565744	6.26759e-06	1.26798e-05	0.366222	0.0755159	5.66859e-07	2.62731e-06
YER009W	NTF2	604.037	0.320833	0.030955	3.00721e-25	1.07042e-24	0.762738	0.0330266	8.92849e-119	6.94978e-117	-0.436602	0.0450531	1.35893e-22	2.4975e-21
YER010C	YER010C	39.511	0.807235	0.0706805	9.95436e-31	4.12272e-30	1.34754	0.0811534	1.6696e-63	4.07245e-62	-0.502764	0.105201	4.16193e-07	1.97925e-06
YER011W	TIR1	47.5747	-1.62199	0.184388	2.81698e-20	8.52016e-20	-0.394629	0.182337	0.0161426	0.0229007	-1.00198	0.290332	4.04281e-06	1.65496e-05
YER012W	PRE1	193.467	0.399242	0.0409882	1.54512e-22	4.99593e-22	0.584367	0.0447966	2.29965e-39	2.5843e-38	-0.181762	0.0598953	0.00204088	0.00507865
YER013W	PRP22	15.6144	-0.211393	0.100203	0.0316062	0.0394928	-0.632853	0.114181	8.13318e-09	2.08368e-08	0.375695	0.143803	0.00373912	0.00874168
YER014W	HEM14	24.4989	0.877761	0.0845466	7.27136e-26	2.64155e-25	0.0641443	0.0916809	0.470568	0.519333	0.75894	0.127757	8.68254e-11	6.33013e-10
YER015W	FAA2	11.2523	-0.547834	0.116319	1.43219e-06	2.45405e-06	-0.276397	0.128312	0.0223374	0.0311301	-0.210244	0.158927	0.132894	0.201377
YER016W	BIM1	29.8013	-0.150664	0.074444	0.0407278	0.0502851	-0.0230116	0.0808909	0.770725	0.803199	-0.116475	0.106157	0.246694	0.33749
YER017C	AFG3	62.8233	-0.451144	0.0554801	2.98016e-16	7.91868e-16	-0.0721286	0.0605365	0.226873	0.267805	-0.360718	0.081062	4.23263e-06	1.72599e-05
YER018C	SPC25	37.845	-1.84138	0.073873	4.07741e-139	1.25475e-137	-1.45179	0.0849083	3.26113e-67	8.58764e-66	-0.348621	0.107962	0.000643318	0.00178463
YER019W	ISC1	41.5566	0.529854	0.0614047	3.78529e-18	1.07257e-17	0.0334059	0.0686012	0.62014	0.664453	0.46999	0.0913206	7.77939e-08	4.14248e-07
YER020W	GPA2	28.9022	1.03979	0.0677405	5.12527e-54	3.56948e-53	0.707646	0.0765473	4.98565e-21	2.55956e-20	0.300831	0.0987402	0.00138876	0.0035857
YER021W	RPN3	174.861	0.22654	0.0418224	5.47083e-08	1.01178e-07	0.133026	0.0453219	0.00307829	0.00478794	0.0897121	0.0608975	0.133638	0.202272
YER022W	SRB4	40.0067	0.179338	0.0556235	0.0011761	0.00165649	-0.267395	0.0631731	1.69888e-05	3.30472e-05	0.4307	0.0830883	7.46683e-08	3.99615e-07
YER023W	PRO3	111.834	0.0605327	0.0487284	0.211889	0.240568	-0.0338464	0.0528069	0.517089	0.566188	0.0913314	0.0707677	0.187208	0.268243
YER024W	YAT2	13.2716	0.0207487	0.0983733	0.830018	0.846816	0.0199328	0.108819	0.848521	0.873099	-0.000146512	0.137995	0.999074	1
YER025W	GCD11	206.615	-0.377531	0.0456462	1.04176e-16	2.81905e-16	-0.284793	0.0484687	2.99121e-09	7.88469e-09	-0.0877038	0.0654939	0.171659	0.249888
YER026C	CHO1	58.6722	-0.00544219	0.0556447	0.921608	0.932531	-0.347245	0.0618812	1.24478e-08	3.15397e-08	0.329361	0.0817457	3.11256e-05	0.000109032
YER027C	GAL83	74.2896	0.208633	0.0508979	3.78403e-05	6.00927e-05	0.0870264	0.0560096	0.115728	0.144061	0.115308	0.0743561	0.110638	0.172898
YER028C	MIG3	27.6144	0.601048	0.0859505	1.40437e-12	3.17256e-12	-0.79651	0.0920906	7.61777e-19	3.49704e-18	1.39819	0.128468	1.43833e-29	4.16017e-28
YER029C	SMB1	80.4275	-1.31216	0.0512307	6.43921e-146	2.18479e-144	-1.30219	0.0574153	2.02651e-115	1.51075e-113	-0.00768426	0.0749014	0.916311	0.945411
YER030W	CHZ1	193.247	-0.455608	0.0365912	9.65172e-36	4.58176e-35	-0.636469	0.0405281	3.97744e-56	7.94438e-55	0.178234	0.0539874	0.000818029	0.00222385
YER031C	YPT31	179.578	-0.104753	0.0318298	0.00097231	0.00137863	0.0327397	0.0355152	0.35424	0.400212	-0.135411	0.0473782	0.00388785	0.00904147
YER032W	FIR1	30.4408	-0.00583246	0.071758	0.934576	0.943308	-0.3416	0.0799801	1.21735e-05	2.39533e-05	0.316131	0.104286	0.00135048	0.00349539
YER033C	ZRG8	14.7868	-1.06393	0.100614	5.15601e-27	1.94934e-26	-1.4483	0.117663	1.70058e-36	1.68561e-35	0.329243	0.143633	0.010938	0.0228471
YER034W	YER034W	41.3981	-1.36032	0.0692208	2.76649e-87	3.6335e-86	-1.19292	0.0788157	3.53195e-53	6.40227e-52	-0.14859	0.100147	0.119815	0.184355
YER035W	EDC2	21.789	-0.453226	0.0976335	2.38192e-06	4.03939e-06	-0.162441	0.105781	0.109438	0.136778	-0.24623	0.13632	0.0480078	0.0845823
YER036C	ARB1	457.753	-0.265775	0.0380011	2.34131e-12	5.2422e-12	-0.348485	0.0402956	3.25071e-18	1.44467e-17	0.0821293	0.0547415	0.128207	0.19573
YER037W	PHM8	3.9688	0.35159	0.222924	0.0865226	0.103285	-0.134537	0.233714	0.496671	0.545863	0.307834	0.274479	0.0992269	0.157625
YER038C	KRE29	0.400663	-0.00502385	0.433938	0.98734	0.988835	0.329546	0.436465	0.220251	0.260686	-0.144618	0.38784	0.14477	0.217012
YER039C	HVG1
YER040W	GLN3	17.7729	0.810031	0.100794	2.7529e-16	7.32217e-16	0.28959	0.110041	0.00593036	0.00890986	0.443878	0.143579	0.000569731	0.00159978
YER041W	YEN1	8.59188	0.521634	0.112285	2.06495e-06	3.51553e-06	0.671908	0.129266	4.71836e-08	1.13365e-07	-0.136596	0.154761	0.322053	0.420065
YER042W	MXR1	149.682	-0.673672	0.0491248	3.72684e-43	2.13026e-42	-0.295582	0.052785	1.49102e-08	3.74558e-08	-0.362061	0.0711479	1.92897e-07	9.62301e-07
YER043C	SAH1	1194.78	0.310791	0.0210503	2.10644e-49	1.32889e-48	0.447914	0.0223833	2.21394e-89	9.52715e-88	-0.136552	0.0306165	7.53149e-06	2.93119e-05
YER044C	ERG28	221.084	-1.9589	0.0612767	2.31792e-226	2.19085e-224	-0.227705	0.0636042	0.00027331	0.000477278	-1.71848	0.088658	1.4394e-83	3.46307e-81
YER045C	ACA1	18.2486	-0.217711	0.102145	0.02979	0.037338	0.205955	0.111017	0.0521551	0.0689619	-0.376818	0.144462	0.003784	0.00883491
YER046W	SPO73	24.6451	0.342221	0.0682163	4.25644e-07	7.49979e-07	2.44659	0.0969286	2.45682e-143	3.33435e-141	-2.08781	0.118455	5.06554e-73	8.93731e-71
YER047C	SAP1	20.7235	0.278108	0.0852625	0.000949776	0.00134885	0.0417159	0.0929457	0.643261	0.686014	0.210004	0.121012	0.0618269	0.104854
YER048C	CAJ1	91.4676	0.175908	0.0443299	6.76196e-05	0.000105578	-0.00980669	0.0493483	0.841021	0.866224	0.179929	0.0655292	0.0050678	0.0115272
YER049W	TPA1	127.792	0.5101	0.0400209	2.09547e-37	1.05431e-36	0.597405	0.0438475	9.26374e-43	1.18437e-41	-0.0866824	0.0585335	0.132519	0.201039
YER050C	RSM18	126.345	-0.591998	0.0424631	1.90914e-44	1.11906e-43	0.0125689	0.0462882	0.784252	0.815238	-0.591612	0.0628531	7.51956e-22	1.29224e-20
YER051W	JHD1	15.0542	0.00636724	0.0995591	0.94808	0.954209	-0.279248	0.111256	0.00861254	0.0126628	0.25585	0.140705	0.0446527	0.0794978
YER052C	HOM3	116.75	0.166147	0.0485374	0.000581658	0.000841638	-0.211106	0.0528775	5.37244e-05	0.000100234	0.366718	0.0709544	1.13204e-07	5.85147e-07
YER053C	PIC2	15.102	0.0531623	0.10706	0.612174	0.643159	0.518214	0.122246	8.77582e-06	1.74955e-05	-0.410449	0.154355	0.00264916	0.00642327
YER054C	GIP2	4.23323	-0.619948	0.171352	0.000142101	0.000216755	-0.486755	0.208876	0.00793985	0.0117292	-0.0525674	0.219197	0.759232	0.82197
YER055C	HIS1	257.346	1.25792	0.0525261	6.69612e-128	1.72051e-126	0.636994	0.0555699	5.66316e-31	4.50077e-30	0.595889	0.0760423	5.90341e-16	6.62061e-15
YER056C	FCY2	425.997	0.126471	0.0332196	0.000135393	0.000207119	-0.269694	0.0353992	1.88244e-14	6.86208e-14	0.391123	0.0482918	2.45798e-16	2.83444e-15
YER057C	HMF1	141.436	0.307817	0.0502676	7.71055e-10	1.56608e-09	0.0106399	0.0538628	0.841687	0.866741	0.285827	0.0727475	5.60931e-05	0.000190688
YER058W	PET117	38.4554	-1.32035	0.0835757	1.80253e-57	1.33812e-56	-0.562838	0.0897055	1.23666e-10	3.53435e-10	-0.69256	0.122691	9.09464e-10	5.97245e-09
YER059W	PCL6	29.0434	-0.188735	0.0718493	0.00796217	0.0104914	-0.560195	0.0811613	1.83016e-12	5.87807e-12	0.349141	0.105075	0.000436768	0.00125779
YER060W	FCY21	36.7733	-1.24563	0.0834712	1.69063e-51	1.12136e-50	-1.34768	0.0915635	1.26679e-50	2.17698e-49	0.0931619	0.116146	0.392248	0.490704
YER061C	CEM1	10.0553	2.4916	0.132817	4.81298e-81	5.52605e-80	2.27925	0.156171	8.20544e-51	1.4147e-49	0.148323	0.175786	0.32671	0.425406
YER062C	GPP2	43.5235	-0.521318	0.104617	3.82695e-07	6.76556e-07	-0.518503	0.112289	1.53048e-06	3.26647e-06	0.00734037	0.141004	0.954295	0.973849
YER063W	THO1	77.1338	0.141416	0.0453697	0.00174363	0.00242359	-0.210891	0.0509206	2.83454e-05	5.41437e-05	0.343417	0.0674505	1.89018e-07	9.44735e-07
YER064C	VHR2	109.773	0.136831	0.0459153	0.00275734	0.00377903	-0.346842	0.0504809	3.97558e-12	1.25329e-11	0.472432	0.0677307	8.16411e-13	7.16627e-12
YER065C	ICL1	3.01168	2.10182	0.216124	1.23919e-24	4.30666e-24	2.79288	0.272241	2.0685e-27	1.42005e-26	-0.386461	0.273761	0.0239202	0.045923
YER066W	RRT13
YER067W	RGI1	5.59746	1.44011	0.199219	1.7465e-14	4.28171e-14	0.974504	0.225416	1.08242e-06	2.34229e-06	0.25264	0.236786	0.151241	0.224801
YER068W	MOT2	30.9765	0.167699	0.070326	0.0160277	0.020626	0.19942	0.0782191	0.00900336	0.0132044	-0.0333272	0.101329	0.729846	0.799974
YER069W	ARG5,6	112.594	-0.909084	0.0897982	9.52428e-25	3.32314e-24	-0.873275	0.0951259	4.6491e-21	2.39142e-20	-0.0256596	0.12199	0.821183	0.869827
YER070W	RNR1	135.918	0.795263	0.0481473	8.68167e-62	6.96243e-61	0.309887	0.0516464	1.32823e-09	3.59606e-09	0.467328	0.0699781	6.9908e-12	5.65785e-11
YER071C	TDA2	36.2589	-0.710251	0.0690669	3.34161e-25	1.18705e-24	-0.425989	0.0766326	1.40122e-08	3.53005e-08	-0.257309	0.0996799	0.00678055	0.0149104
YER072W	VTC1	438.403	2.15879	0.0559006	0	0	0.67976	0.0591096	3.12877e-31	2.53608e-30	1.46339	0.0817121	5.69244e-73	9.71937e-71
YER073W	ALD5	93.7499	2.04101	0.08101	2.86573e-142	9.24898e-141	1.34422	0.0874665	6.96593e-55	1.34075e-53	0.634681	0.117704	6.0694e-09	3.69257e-08
YER074W	RPS24A	1886.13	0.0632719	0.0291219	0.0295052	0.0370161	0.0455583	0.0304933	0.133739	0.1647	0.0173195	0.0419325	0.677149	0.754876
YER075C	PTP3	26.6399	0.182146	0.0750545	0.0141329	0.0182988	-0.132503	0.0834534	0.102958	0.129209	0.292646	0.108942	0.00431912	0.00997865
YER076C	YER076C	14.645	-1.47126	0.133753	1.28213e-29	5.18832e-29	-1.27667	0.148419	2.29072e-19	1.07872e-18	-0.136436	0.172664	0.359528	0.458218
YER077C	MRX1	9.95258	-0.405401	0.107487	0.000119641	0.00018382	0.0807064	0.117722	0.471555	0.520205	-0.421821	0.154064	0.00204042	0.00507865
YER078C	ICP55	32.7356	0.227064	0.0655263	0.000475928	0.000696937	0.224749	0.0733759	0.00175059	0.0028019	-0.00188084	0.0951016	0.983506	0.994837
YER079W	YER079W	9.774	1.25315	0.126787	3.39224e-24	1.16215e-23	0.946965	0.148193	1.33304e-11	4.05972e-11	0.218003	0.171508	0.13954	0.209942
YER080W	AIM9	50.5267	0.938824	0.0589194	7.3811e-58	5.5259e-57	0.515856	0.0658095	1.87988e-15	7.26292e-15	0.395636	0.0866051	2.01101e-06	8.59796e-06
YER081W	SER3	43.258	-1.23768	0.145854	1.55308e-18	4.47007e-18	-0.1575	0.145783	0.245179	0.288114	-0.94625	0.226574	2.32789e-07	1.143e-06
YER082C	UTP7	65.7163	0.337168	0.0504041	1.8359e-11	3.97117e-11	0.731375	0.0562151	2.06479e-39	2.32531e-38	-0.381623	0.0743583	1.31735e-07	6.76305e-07
YER083C	GET2	71.2166	0.270201	0.047225	9.19329e-09	1.76561e-08	0.026614	0.0522676	0.606871	0.651555	0.234571	0.0695486	0.000562455	0.00158019
YER084W	YER084W	4.23737	0.554568	0.189532	0.00187128	0.00259693	0.140734	0.197316	0.419761	0.46824	0.260257	0.234905	0.141314	0.212313
YER085C	YER085C	0.553133	0.291523	0.446548	0.366067	0.401075	0.130819	0.406231	0.608696	0.653382	0.0382984	0.367285	0.90598	0.937691
YER086W	ILV1	177.943	0.933668	0.0359407	1.79636e-149	6.69587e-148	0.33506	0.0392873	9.48727e-18	4.11945e-17	0.587048	0.0531341	2.51436e-29	7.15512e-28
YER087W	AIM10	29.5173	-0.952429	0.0756446	4.53792e-37	2.24689e-36	-0.656373	0.0841872	1.62965e-15	6.31461e-15	-0.261937	0.108343	0.0104293	0.0218709
YER088C	DOT6	37.7591	2.12375	0.0785105	1.94291e-163	8.22708e-162	1.20488	0.0874256	1.18576e-44	1.63871e-43	0.858342	0.119253	7.29083e-15	7.36458e-14
YER089C	PTC2	147.755	0.731845	0.0456135	2.3647e-58	1.78805e-57	0.0612602	0.0491258	0.208112	0.247536	0.654504	0.0672321	1.8087e-23	3.51966e-22
YER090W	TRP2	95.7055	0.690803	0.0468761	1.58239e-49	1.00067e-48	0.015128	0.0514522	0.766455	0.799787	0.658991	0.0698713	2.86021e-22	5.14935e-21
YER091C	MET6	80.332	0.627015	0.094788	1.82089e-11	3.94029e-11	-0.180957	0.098414	0.0564717	0.0741515	0.757218	0.140011	1.95939e-09	1.24056e-08
YER092W	IES5	53.9573	-0.998142	0.0617453	1.45882e-59	1.13385e-58	-0.932948	0.0694287	3.15021e-42	3.92331e-41	-0.0567229	0.089503	0.511344	0.607802
YER093C	TSC11	23.9385	0.10924	0.0707962	0.119096	0.139742	-0.351196	0.0811795	9.28953e-06	1.84709e-05	0.434788	0.105476	1.22255e-05	4.58285e-05
YER094C	PUP3	229.136	-0.028135	0.0388839	0.467932	0.503203	0.256224	0.0423178	1.06074e-09	2.88812e-09	-0.279257	0.0569377	6.47648e-07	2.97054e-06
YER095W	RAD51	40.5041	-0.208487	0.0860763	0.0140316	0.0181765	0.587454	0.0943304	1.5345e-10	4.35969e-10	-0.754865	0.129586	1.88257e-10	1.32155e-09
YER096W	SHC1	2.07888	-0.286848	0.238949	0.186888	0.213834	-0.203412	0.257304	0.335832	0.381564	-0.022413	0.267597	0.897496	0.931643
YER097W	YER097W
YER098W	UBP9	2.74091	0.295831	0.213057	0.13404	0.156168	0.122216	0.227821	0.5295	0.577983	0.0892197	0.250197	0.612115	0.699918
YER099C	PRS2	46.9227	-0.00407222	0.0585451	0.944169	0.950903	0.0700338	0.0649106	0.272868	0.317008	-0.0713269	0.0854565	0.387775	0.486278
YER100W	UBC6	47.5065	0.367574	0.0571667	1.00878e-10	2.11464e-10	0.0341179	0.063191	0.583592	0.629628	0.316303	0.0839139	9.3287e-05	0.000302739
YER101C	AST2	14.2383	-0.047603	0.101562	0.632925	0.662986	-0.0526953	0.111963	0.622724	0.666952	0.00666209	0.141606	0.958613	0.977261
YER102W	RPS8B	2117.76	-1.249	0.0308932	0	0	-1.09727	0.0323896	7.20273e-253	2.72315e-250	-0.148551	0.0443656	0.000727583	0.00199332
YER103W	SSA4	35.0458	-0.696938	0.0866535	3.61801e-16	9.5655e-16	-1.08042	0.0958938	9.87707e-31	7.82624e-30	0.345184	0.122885	0.00241963	0.00592646
YER104W	RTT105	3.15724	0.97844	0.214751	8.6769e-07	1.50137e-06	1.05164	0.24908	1.28616e-06	2.76285e-06	-0.0658116	0.241647	0.711747	0.784196
YER105C	NUP157	86.6592	0.0452654	0.0461077	0.324103	0.358361	-0.306482	0.0514836	1.78692e-09	4.79623e-09	0.342849	0.0682938	2.71906e-07	1.32279e-06
YER106W	MAM1	1.54298	1.5004	0.399557	4.51414e-06	7.55163e-06	0.556259	0.363436	0.0348169	0.0472892	0.309355	0.366847	0.108416	0.169977
YER107C	GLE2	45.8448	0.173424	0.0603613	0.00379783	0.00515565	0.504717	0.0674493	3.09067e-14	1.10983e-13	-0.316983	0.0884148	0.000194624	0.000598226
YER109C	FLO8
YER110C	KAP123	171.826	0.809615	0.0380569	6.00327e-101	1.02171e-99	0.465694	0.041325	8.91526e-30	6.81914e-29	0.334244	0.0556526	1.06499e-09	6.9336e-09
YER111C	SWI4	13.3452	0.137326	0.111647	0.208251	0.23664	0.080082	0.120185	0.48328	0.532141	0.0438846	0.151805	0.745926	0.812719
YER112W	LSM4	120.588	0.545228	0.0392022	3.36687e-44	1.96049e-43	0.360075	0.0435597	8.37517e-17	3.48779e-16	0.178482	0.0578781	0.00171819	0.00434122
YER113C	TMN3	51.5838	0.0924007	0.0559673	0.0965659	0.114602	0.0666069	0.061244	0.269871	0.31394	0.023515	0.081226	0.764797	0.826305
YER114C	BOI2	33.7694	-0.00651045	0.067034	0.921953	0.932702	-0.312106	0.0741879	1.73032e-05	3.36217e-05	0.289908	0.0972937	0.00176883	0.00446255
YER115C	SPR6	33.517	0.466085	0.0709402	3.43755e-11	7.37234e-11	0.442504	0.0774558	5.50166e-09	1.42189e-08	0.0164298	0.100743	0.864189	0.904877
YER116C	SLX8	2.30961	1.27931	0.259877	5.04724e-08	9.34745e-08	0.908388	0.291048	0.000154478	0.00027614	0.14321	0.27003	0.425149	0.523572
YER117W	RPL23B	2687.47	-0.0702915	0.0299363	0.018641	0.0238325	0.318533	0.0313326	1.86086e-24	1.12953e-23	-0.384837	0.0431505	2.36407e-19	3.39106e-18
YER118C	SHO1	85.7846	-0.127535	0.0488647	0.00870895	0.0114497	-0.136986	0.053544	0.00964885	0.0141003	0.010601	0.0712368	0.878829	0.915858
YER119C	AVT6	13.3195	1.58265	0.107926	2.56516e-50	1.64974e-49	1.01267	0.123025	1.18501e-17	5.11602e-17	0.466387	0.15432	0.000651793	0.00180531
YER120W	SCS2	317.402	0.476547	0.029713	4.677e-58	3.52139e-57	0.186939	0.0321633	5.29242e-09	1.37049e-08	0.284781	0.0435518	4.06509e-11	3.06067e-10
YER121W	YER121W	4.56515	0.916331	0.170846	1.70004e-08	3.22058e-08	0.784083	0.206039	2.04606e-05	3.95537e-05	0.0547599	0.213835	0.746846	0.813386
YER122C	GLO3	79.6093	-0.63412	0.0546729	2.04486e-31	8.63114e-31	-0.496135	0.0597402	4.37119e-17	1.84356e-16	-0.12774	0.0789812	0.0956872	0.152736
YER123W	YCK3	19.2914	-2.09121	0.109684	2.68156e-83	3.17528e-82	-2.16541	0.124651	5.18306e-70	1.45153e-68	0.0638401	0.14845	0.632232	0.717189
YER124C	DSE1	26.4965	0.984597	0.0997618	9.66704e-24	3.26741e-23	-0.956886	0.110635	4.07014e-19	1.89808e-18	1.95264	0.148999	2.11435e-40	1.09718e-38
YER125W	RSP5	13.7864	-0.983113	0.12473	5.50509e-16	1.44536e-15	-0.423518	0.13324	0.000745008	0.00123809	-0.44408	0.171735	0.00276942	0.00668728
YER126C	NSA2	132.276	-1.10882	0.0402113	2.5514e-168	1.20576e-166	-0.714366	0.0443597	4.96359e-59	1.07234e-57	-0.381843	0.0592483	5.71847e-11	4.24514e-10
YER127W	LCP5	96.8071	-0.599356	0.047732	1.93277e-36	9.38548e-36	-0.380257	0.0523128	2.09681e-13	7.14182e-13	-0.208322	0.0695823	0.00219783	0.00542842
YER128W	VFA1	12.8444	1.50531	0.120502	2.4851e-37	1.24561e-36	0.846352	0.13213	1.78217e-11	5.38415e-11	0.530358	0.170106	0.000308229	0.000919647
YER129W	SAK1	47.3735	0.0207876	0.063055	0.73969	0.76383	-0.141825	0.0688582	0.0358526	0.0485712	0.155315	0.0909938	0.0753676	0.125014
YER130C	COM2	19.6379	0.150179	0.0934841	0.102387	0.121184	0.0796666	0.101365	0.414617	0.463086	0.0587556	0.130337	0.625108	0.711791
YER131W	RPS26B	1789.33	-0.823382	0.0381143	4.88291e-104	8.7315e-103	-0.026257	0.0396463	0.505199	0.554086	-0.787072	0.0553109	2.46037e-47	1.60775e-45
YER132C	PMD1	22.6245	1.11907	0.0916485	3.00226e-35	1.40503e-34	0.841047	0.100005	5.02353e-18	2.21764e-17	0.234104	0.126954	0.0459362	0.0813602
YER133W	GLC7
YER134C	YER134C	25.4318	0.115044	0.0772099	0.131649	0.153586	0.419881	0.0866152	6.50657e-07	1.43737e-06	-0.284424	0.111638	0.00675983	0.0148772
YER135C	YER135C
YER136W	GDI1	61.5907	-0.35725	0.0707431	3.51601e-07	6.2304e-07	-0.492335	0.0768559	6.52439e-11	1.90688e-10	0.12961	0.100397	0.175199	0.254271
YER137C	YER137C	38.5944	1.07193	0.0678616	4.29109e-57	3.17661e-56	1.42393	0.078572	4.75331e-75	1.45429e-73	-0.326516	0.100108	0.000606551	0.00168972
YER138C	YER138C
YER139C	RTR1	10.6365	-2.87096	0.146366	3.92616e-88	5.26106e-87	-2.7048	0.173306	1.03913e-57	2.14848e-56	-0.110454	0.188708	0.484155	0.580701
YER140W	EMP65	15.4025	0.83854	0.0868352	1.2626e-22	4.09744e-22	0.802193	0.101339	3.51238e-16	1.41377e-15	0.022139	0.124234	0.847893	0.891871
YER141W	COX15	49.8129	-0.991886	0.0727948	4.73264e-43	2.69934e-42	-0.136012	0.0776027	0.0727998	0.0935266	-0.814885	0.108651	1.35099e-15	1.4388e-14
YER142C	MAG1	19.8633	-0.248596	0.0955555	0.00815583	0.0107385	-0.229015	0.106956	0.0254283	0.0351911	-0.00908085	0.134076	0.941132	0.964269
YER143W	DDI1	53.424	-0.237333	0.0622422	0.000122388	0.000187659	-0.256358	0.0695136	0.000170046	0.000302844	0.0216894	0.0904341	0.803034	0.855568
YER144C	UBP5	28.7435	0.293195	0.0795372	0.00019281	0.00029125	0.0994632	0.0877353	0.243279	0.286213	0.172093	0.113801	0.107682	0.168977
YER145C	FTR1	150.877	1.05095	0.0461582	1.3082e-115	2.82625e-114	0.342713	0.0498754	3.99383e-12	1.25829e-11	0.688966	0.0680262	2.36465e-25	5.15065e-24
YER146W	LSM5	122.848	-0.60774	0.0472224	3.45875e-38	1.77567e-37	-0.362659	0.0517655	1.47666e-12	4.7804e-12	-0.233661	0.0689129	0.000543885	0.00153045
YER147C	SCC4	18.2937	-0.321289	0.0905015	0.000316341	0.000470996	-0.432834	0.102491	1.20464e-05	2.3712e-05	0.106735	0.128101	0.367993	0.467207
YER148W	SPT15	163.735	0.0929403	0.0425392	0.0282834	0.0355591	-0.0411458	0.0456237	0.363269	0.409713	0.130746	0.0616704	0.0307685	0.0574796
YER149C	PEA2	27.6152	0.319627	0.0781749	3.58515e-05	5.714e-05	0.594808	0.0876554	3.67197e-12	1.16034e-11	-0.256437	0.112394	0.0151844	0.0306759
YER150W	SPI1	4.38725	1.50213	0.225002	7.06214e-13	1.62521e-12	1.33578	0.257258	4.80263e-09	1.24671e-08	0.0667897	0.244876	0.710786	0.783702
YER151C	UBP3	85.3508	-0.192284	0.0442933	1.30844e-05	2.13687e-05	-0.469409	0.0494654	1.0932e-21	5.84476e-21	0.270598	0.0654695	2.44511e-05	8.76826e-05
YER152C	YER152C	38.7079	1.26938	0.0702272	3.34433e-74	3.41728e-73	0.328248	0.0793214	2.25677e-05	4.34683e-05	0.897511	0.10839	1.06231e-18	1.44918e-17
YER153C	PET122
YER154W	OXA1	73.1438	0.286758	0.0530528	5.5563e-08	1.02615e-07	0.255624	0.0580407	8.00547e-06	1.60443e-05	0.0269714	0.0768739	0.718421	0.789616
YER155C	BEM2	52.1308	0.594218	0.0540719	2.29746e-28	8.98115e-28	0.0396885	0.0596094	0.499747	0.548675	0.532919	0.0802545	5.67046e-12	4.62461e-11
YER156C	YER156C	175.615	-0.13811	0.0414996	0.000836561	0.00119548	0.133233	0.0446658	0.00263614	0.00413915	-0.265463	0.0603689	7.70508e-06	2.99215e-05
YER157W	COG3	20.7176	-0.0620104	0.0896491	0.482544	0.517235	0.183498	0.0988375	0.0540463	0.0712673	-0.223594	0.127188	0.0569471	0.0977687
YER158C	YER158C	15.3097	-1.06565	0.124996	1.97658e-18	5.66434e-18	-0.910264	0.13851	4.60204e-12	1.44476e-11	-0.108472	0.164129	0.449631	0.548489
YER159C	BUR6	122.789	1.17044	0.0597249	1.52519e-86	1.9738e-85	0.923764	0.0645773	1.8283e-47	2.79687e-46	0.228462	0.0853393	0.00556188	0.0125379
YER160C	YER160C
YER161C	SPT2	37.1043	0.523404	0.0664151	2.00969e-15	5.1264e-15	0.532418	0.0744502	3.36043e-13	1.13147e-12	-0.0136135	0.0959917	0.882232	0.918861
YER162C	RAD4	12.0702	-0.0247659	0.116077	0.827023	0.844575	-0.475536	0.130681	0.000120037	0.000216919	0.390679	0.164423	0.00656511	0.0145212
YER163C	GCG1	55.0638	-0.136948	0.0569391	0.0154576	0.0199262	-0.229064	0.0633076	0.000235347	0.000413851	0.0902219	0.0830393	0.261779	0.354101
YER164W	CHD1	59.7248	0.580277	0.0517922	2.15146e-29	8.64011e-29	0.181888	0.0568318	0.00118252	0.00192824	0.380221	0.0759358	2.42229e-07	1.18495e-06
YER165W	PAB1	434.688	-0.667777	0.0439446	1.69117e-52	1.14176e-51	-0.486755	0.0462321	2.88539e-26	1.89484e-25	-0.173473	0.0628195	0.00490888	0.0111946
YER166W	DNF1	83.0081	0.829849	0.0467871	6.19983e-71	5.91274e-70	0.0761757	0.0512734	0.133346	0.164293	0.736196	0.0698844	2.29834e-27	5.73827e-26
YER167W	BCK2	32.1062	0.457328	0.067922	1.15273e-11	2.51396e-11	0.432045	0.0752147	4.70178e-09	1.22232e-08	0.0182528	0.0974792	0.844324	0.889001
YER168C	CCA1	47.8069	0.196974	0.0595458	0.000863909	0.00123219	0.497151	0.0660521	2.26143e-14	8.19286e-14	-0.287673	0.0868125	0.000589115	0.00164722
YER169W	RPH1	46.0338	-0.171789	0.0552859	0.00176655	0.0024548	-0.24035	0.0618553	7.9267e-05	0.000145479	0.0680608	0.0809607	0.385577	0.484304
YER170W	ADK2	14.8572	-1.27985	0.11155	1.14696e-31	4.86449e-31	-1.46636	0.127379	2.31881e-32	1.96375e-31	0.156327	0.151874	0.247723	0.338461
YER171W	RAD3	42.8226	0.342031	0.0583175	3.64965e-09	7.15732e-09	0.503333	0.0653493	5.71676e-15	2.14601e-14	-0.156241	0.0851792	0.0573941	0.0982806
YER172C	BRR2	54.6696	0.571258	0.0567718	4.55354e-24	1.55597e-23	0.177694	0.0625583	0.00390384	0.00598581	0.372007	0.0831986	3.45776e-06	1.43208e-05
YER173W	RAD24	27.4069	-1.00067	0.0728525	1.01518e-43	5.86607e-43	-1.17018	0.0838775	1.23242e-45	1.76303e-44	0.157797	0.105622	0.114143	0.177433
YER174C	GRX4	88.1888	-0.89433	0.0584605	1.82527e-53	1.26125e-52	-0.527812	0.0633144	3.06093e-17	1.2982e-16	-0.343232	0.0843298	2.45289e-05	8.7902e-05
YER175C	TMT1	8.27264	0.628981	0.157642	3.12435e-05	4.99764e-05	0.732603	0.174462	4.81926e-06	9.87165e-06	-0.0917513	0.196963	0.570699	0.662727
YER176W	ECM32	54.1795	1.34575	0.0579308	1.17427e-120	2.79974e-119	1.06803	0.0653979	3.20565e-61	7.37718e-60	0.257556	0.0848345	0.00169061	0.00428153
YER177W	BMH1	1452.08	0.121272	0.0276112	1.0844e-05	1.7748e-05	0.0397973	0.0290609	0.169443	0.205091	0.0803723	0.0398853	0.0423322	0.0759025
YER178W	PDA1	262.533	-0.205944	0.034129	1.46115e-09	2.92617e-09	-0.339222	0.0371896	4.70178e-20	2.29369e-19	0.13189	0.0499991	0.00757388	0.0165041
YER179W	DMC1	1.71998	-0.287557	0.269426	0.229049	0.258995	-1.24704	0.352394	1.08946e-05	2.14927e-05	0.557819	0.390581	0.0108894	0.0227547
YER180C	ISC10	14.4951	0.0336918	0.0831558	0.68145	0.707932	-0.0807312	0.096039	0.384574	0.431901	0.104993	0.1214	0.353164	0.452285
YER181C	YER181C
YER182W	FMP10	35.3749	-1.00807	0.0791247	5.6214e-38	2.86372e-37	-0.230737	0.0856387	0.00556227	0.008383	-0.723506	0.117839	3.62409e-11	2.74033e-10
YER183C	FAU1	50.0936	-0.341884	0.0562861	1.01435e-09	2.04453e-09	0.404969	0.0634963	9.79426e-11	2.82205e-10	-0.727998	0.0853355	6.61579e-19	9.19092e-18
YER184C	TOG1	0.731705	0.326091	0.375448	0.274977	0.307058	0.522032	0.414762	0.05976	0.0780626	-0.113081	0.34611	0.438031	0.536565
YER185W	PUG1	4.52897	-1.40951	0.206522	3.47225e-13	8.07851e-13	-2.2059	0.240844	1.72392e-22	9.55468e-22	0.493633	0.272955	0.0102779	0.0215963
YER186C	YER186C
YER187W	YER187W
YER188W	YER188W
YER189W	YER189W
YER190W	YRF1-2
YFL001W	DEG1	43.3399	-0.336401	0.0640665	1.23549e-07	2.248e-07	0.13697	0.070089	0.0463339	0.0618213	-0.450452	0.0938291	5.15993e-07	2.41055e-06
YFL002C	SPB4	44.7645	0.0163304	0.061925	0.79046	0.811963	0.132513	0.0681404	0.0476386	0.0634821	-0.111588	0.0897339	0.196772	0.27945
YFL003C	MSH4	4.03953	-0.628419	0.189122	0.000413176	0.000610025	-0.362459	0.207795	0.0461636	0.0616097	-0.143222	0.229081	0.410525	0.509355
YFL004W	VTC2	101.239	1.59615	0.0491474	5.18764e-233	5.08484e-231	0.512746	0.0541211	1.12944e-21	6.03241e-21	1.06504	0.074122	2.06115e-49	1.43549e-47
YFL005W	SEC4	94.8268	0.289104	0.049821	5.58648e-09	1.08591e-08	0.46439	0.0546382	9.07725e-18	3.94465e-17	-0.170881	0.0724976	0.0157416	0.0316566
YFL007W	BLM10	84.4067	0.936683	0.0542478	1.6931e-67	1.50362e-66	0.510866	0.0597759	5.33857e-18	2.35084e-17	0.402889	0.0794217	1.62396e-07	8.19411e-07
YFL008W	SMC1	54.9415	0.762534	0.0555277	2.24673e-43	1.2926e-42	0.467603	0.0615254	1.3913e-14	5.1318e-14	0.276371	0.0810507	0.000418982	0.00121052
YFL009W	CDC4	54.3511	0.393523	0.0605365	6.11101e-11	1.29538e-10	-0.525453	0.0673696	2.49196e-15	9.57179e-15	0.901825	0.0922	1.17901e-24	2.44725e-23
YFL010C	WWM1	146.723	0.876122	0.0389119	7.19148e-113	1.4986e-111	0.291379	0.0430513	9.14677e-12	2.82132e-11	0.571242	0.0578709	9.39215e-24	1.87595e-22
YFL011W	HXT10	0.200687	-0.270752	0.51566	0.414632	0.449907	-0.0456057	0.450199	0.856177	0.87978	-0.0609095	0.398959	0.763148	0.825029
YFL012W	YFL012W	0.330008	0.120272	0.51941	0.712866	0.737962	0.196589	0.48092	0.443952	0.493042	-0.0403246	0.402347	1	1
YFL013C	IES1	29.6404	-1.26764	0.075977	1.14262e-63	9.53922e-63	-1.62295	0.0874202	9.95303e-79	3.27213e-77	0.322847	0.110704	0.00187532	0.004711
YFL014W	HSP12	51.8599	-0.174445	0.190209	0.329714	0.364262	1.14622	0.21562	4.23097e-09	1.10372e-08	-1.21833	0.328405	9.03041e-07	4.07138e-06
YFL015C	YFL015C
YFL016C	MDJ1	66.4984	-0.318908	0.0555943	8.055e-09	1.55093e-08	0.0843504	0.0606772	0.158493	0.192852	-0.387029	0.0813415	8.41199e-07	3.81531e-06
YFL017C	GNA1	55.8205	-0.160494	0.0496154	0.00114788	0.00161803	-0.120199	0.056258	0.0304882	0.0417801	-0.037012	0.0736561	0.606087	0.694828
YFL018C	LPD1	229.728	0.437407	0.043109	2.47551e-24	8.53051e-24	0.243006	0.0463643	1.23477e-07	2.90344e-07	0.186856	0.0624574	0.00228946	0.00563632
YFL019C	YFL019C
YFL020C	PAU5
YFL021W	GAT1	25.7266	2.30896	0.146358	1.65116e-58	1.25749e-57	1.2203	0.159021	5.57584e-16	2.21901e-15	0.900099	0.226488	6.44253e-07	2.95753e-06
YFL022C	FRS2	414.624	0.0662616	0.0360408	0.065233	0.0788847	-0.335161	0.0384665	1.89156e-18	8.49198e-18	0.395435	0.0523931	1.95495e-14	1.91977e-13
YFL023W	BUD27	53.8536	0.559666	0.0577556	1.90967e-22	6.15584e-22	0.29612	0.0641293	2.69034e-06	5.63067e-06	0.245809	0.0842878	0.00253207	0.00617045
YFL024C	EPL1	14.4906	0.846296	0.113303	2.14139e-14	5.22562e-14	1.26257	0.128629	2.95054e-24	1.76665e-23	-0.347692	0.157493	0.0126515	0.0260562
YFL025C	BST1	15.6624	0.361818	0.103856	0.000386162	0.000571256	0.13767	0.110879	0.194113	0.232348	0.185697	0.142468	0.149787	0.223205
YFL026W	STE2	3.20599	0.441703	0.239406	0.0423418	0.0521562	-0.644668	0.270457	0.00387925	0.00595155	0.876485	0.409233	0.000439407	0.0012647
YFL027C	GYP8	11.3818	0.800805	0.0996138	2.77141e-16	7.36768e-16	1.05952	0.117179	8.43892e-21	4.27847e-20	-0.227037	0.141407	0.0756356	0.12538
YFL028C	CAF16	65.6345	-0.240317	0.0548131	1.03621e-05	1.69752e-05	-0.35499	0.0611043	3.82137e-09	1.0028e-08	0.112285	0.0800794	0.147957	0.221158
YFL029C	CAK1	18.3483	1.00942	0.0821573	1.69593e-35	7.97914e-35	0.654904	0.0948229	1.27006e-12	4.13178e-12	0.306592	0.119445	0.00573873	0.0128981
YFL030W	AGX1	4.69943	0.939505	0.17738	2.27412e-08	4.27904e-08	1.82931	0.229716	1.46751e-17	6.30481e-17	-0.632009	0.275094	0.00122272	0.00318967
YFL031W	HAC1	22.2859	-0.655022	0.100729	3.59879e-11	7.71502e-11	-0.275064	0.11093	0.00946384	0.0138376	-0.317818	0.141641	0.0137092	0.0280165
YFL032W	YFL032W
YFL033C	RIM15	23.896	0.187738	0.0775364	0.0142919	0.0184956	0.178154	0.0868101	0.0346029	0.0470589	0.00401534	0.111332	0.969388	0.985588
YFL034W	MIL1	26.5085	0.314818	0.0770695	3.66257e-05	5.81988e-05	-0.314653	0.0861973	0.00017375	0.000309129	0.594267	0.115025	2.65525e-08	1.50635e-07
YFL036W	RPO41	46.3129	-0.424258	0.0612475	3.14776e-12	7.00929e-12	-0.00721565	0.0666888	0.912393	0.926217	-0.394932	0.0893857	4.14943e-06	1.69598e-05
YFL037W	TUB2	410.893	-0.0698768	0.0307039	0.0225772	0.0286436	-0.33622	0.033114	2.04329e-24	1.23602e-23	0.26332	0.0448744	3.02162e-09	1.88158e-08
YFL038C	YPT1	381.602	-0.282714	0.0264253	8.94308e-27	3.35714e-26	-0.53089	0.0290882	8.18542e-75	2.48997e-73	0.246089	0.0390921	2.35202e-10	1.63591e-09
YFL039C	ACT1	1601.21	-0.027708	0.0191387	0.147369	0.170945	-0.103177	0.0203349	3.72509e-07	8.39017e-07	0.0752045	0.0278565	0.00674244	0.0148451
YFL040W	YFL040W	6.51307	0.237603	0.176008	0.154666	0.178979	0.36096	0.192556	0.0350396	0.0475672	-0.104608	0.217155	0.538335	0.632661
YFL041W	FET5	37.2712	-0.418696	0.0761523	2.81733e-08	5.27117e-08	-0.56951	0.0835892	3.30757e-12	1.04707e-11	0.14321	0.107954	0.160751	0.23681
YFL042C	LAM5	21.9721	0.374387	0.0897865	2.36006e-05	3.79113e-05	-0.181222	0.0990851	0.0576832	0.075611	0.508839	0.131645	2.35745e-05	8.45964e-05
YFL044C	OTU1	8.96726	0.351593	0.124343	0.00367965	0.00500293	0.553322	0.141167	3.06663e-05	5.82617e-05	-0.175796	0.168413	0.23087	0.319142
YFL045C	SEC53	716.362	-0.479468	0.0250249	5.42695e-82	6.29931e-81	-0.461178	0.0266461	2.0067e-67	5.31073e-66	-0.0174618	0.036359	0.628963	0.714572
YFL046W	FMP32	54.834	0.0936297	0.0557166	0.0907739	0.10797	0.0812076	0.061971	0.183511	0.220605	0.0105278	0.0815638	0.894181	0.92893
YFL047W	RGD2	22.9903	-0.220581	0.0920421	0.0148991	0.0192485	-0.0663755	0.0997402	0.490253	0.53937	-0.132988	0.128784	0.262868	0.355301
YFL048C	EMP47	90.0961	0.863247	0.0498758	1.04884e-67	9.34596e-67	0.400833	0.0544177	9.7242e-14	3.39513e-13	0.442684	0.0729769	4.21454e-10	2.87099e-09
YFL049W	SWP82	42.1874	-0.0540178	0.0594189	0.359885	0.394836	-0.129493	0.0666208	0.0479255	0.0638484	0.0734016	0.0870843	0.382181	0.480952
YFL050C	ALR2	6.14527	-0.856541	0.168474	9.28896e-08	1.70009e-07	-0.57652	0.182509	0.000489497	0.000831325	-0.169846	0.207281	0.307948	0.405727
YFL051C	YFL051C	267.49	-6.84649	0.132036	0	0	-4.80801	0.136261	1.57706e-273	8.34735e-271	-1.98336	0.190164	1.94127e-26	4.48697e-25
YFL052W	ZNF1
YFL053W	DAK2	0.315178	0.46643	0.473414	0.161694	0.186459	-0.010841	0.407915	0.965843	0.970426	0.15759	0.398119	0.300633	0.397713
YFL054C	AQY3	8.55764	-0.394459	0.140766	0.00374233	0.00508683	-0.750042	0.160727	5.21601e-07	1.16393e-06	0.287408	0.188846	0.0684894	0.114684
YFL055W	AGP3	2.32615	-1.53467	0.265166	1.80442e-10	3.75278e-10	-1.92623	0.306251	1.96152e-12	6.29232e-12	0.191227	0.275602	0.269748	0.363302
YFL056C	AAD6
YFL057C	AAD16
YFL058W	THI5
YFL059W	SNZ3
YFL060C	SNO3
YFL061W	DDI2
YFL062W	COS4
YFL063W	YFL063W
YFL064C	YFL064C
YFL065C	YFL065C
YFL066C	YFL066C
YFL067W	YFL067W
YFL068W	YFL068W
YFR001W	LOC1	179.965	-0.829173	0.0497312	5.85028e-63	4.81579e-62	-0.253152	0.0529113	1.29992e-06	2.79014e-06	-0.555779	0.0722736	2.8966e-15	2.99448e-14
YFR002W	NIC96	71.4601	-0.694273	0.053963	2.93761e-38	1.51106e-37	-0.412219	0.0590425	1.56682e-12	5.05065e-12	-0.265597	0.0783361	0.000470199	0.0013431
YFR003C	YPI1	35.1092	0.586137	0.0696348	2.08888e-17	5.78266e-17	0.812411	0.0804202	7.47052e-25	4.61933e-24	-0.213433	0.102038	0.0278143	0.0525978
YFR004W	RPN11	128.951	-0.062167	0.0360526	0.0837818	0.100148	0.032638	0.0405033	0.417389	0.465986	-0.0930314	0.0537603	0.0795266	0.130847
YFR005C	SAD1	28.7639	0.685717	0.0732947	3.54141e-21	1.10588e-20	0.896333	0.0823596	1.3734e-28	9.97172e-28	-0.196935	0.105273	0.04802	0.0845823
YFR006W	YFR006W	39.929	-0.303091	0.0677618	6.49956e-06	1.07844e-05	-0.149181	0.0739809	0.0393716	0.0530264	-0.139761	0.0972187	0.132694	0.201189
YFR007W	YFH7	11.344	0.684143	0.115134	1.18633e-09	2.38302e-09	0.94496	0.131262	4.93807e-14	1.74948e-13	-0.222221	0.157555	0.110686	0.172923
YFR008W	FAR7	4.20301	-1.38415	0.196269	7.60617e-14	1.81676e-13	-1.55526	0.230303	2.17802e-13	7.41367e-13	0.115199	0.229389	0.503593	0.600342
YFR009W	GCN20	91.168	0.415852	0.0472086	9.40637e-19	2.72065e-18	-0.18915	0.0520559	0.000238317	0.000418795	0.591091	0.0702042	5.15089e-18	6.71519e-17
YFR010W	UBP6	51.7449	-0.0871686	0.0578059	0.128924	0.150672	0.0888752	0.0645843	0.161964	0.196758	-0.168404	0.0848604	0.040051	0.0723267
YFR011C	MIC19	35.7618	-0.540274	0.0755479	5.11971e-13	1.1849e-12	0.445451	0.0839838	5.55154e-08	1.329e-07	-0.962716	0.116602	9.07287e-19	1.24734e-17
YFR012W	DCV1
YFR013W	IOC3	41.6175	0.476426	0.0598592	1.16805e-15	2.99976e-15	-0.0579651	0.0657598	0.370202	0.416999	0.511008	0.0884811	1.65839e-09	1.06141e-08
YFR014C	CMK1	8.91249	1.49359	0.136409	2.07902e-29	8.36188e-29	1.56638	0.156084	1.74737e-25	1.10368e-24	-0.0618009	0.176645	0.682757	0.759368
YFR015C	GSY1	7.40082	-0.197639	0.151297	0.174035	0.199776	-0.651421	0.173186	4.08754e-05	7.69668e-05	0.359796	0.205322	0.0296835	0.0556553
YFR016C	AIP5	32.2949	1.58505	0.0774843	1.23784e-94	1.88814e-93	0.601489	0.0849931	4.592e-13	1.53638e-12	0.930117	0.117963	2.11851e-17	2.63841e-16
YFR017C	IGD1	5.44026	0.856664	0.172132	1.62224e-07	2.93154e-07	0.231836	0.183607	0.158881	0.193216	0.426405	0.230434	0.0164797	0.0329408
YFR018C	YFR018C	52.5811	1.17522	0.0594215	4.25476e-88	5.68698e-87	0.576736	0.0662979	1.14661e-18	5.205e-18	0.56468	0.0882187	2.39797e-11	1.83948e-10
YFR019W	FAB1	20.5316	-0.254108	0.0866649	0.00294969	0.00403221	-0.972075	0.0996282	1.2805e-23	7.48092e-23	0.665607	0.131487	2.71048e-08	1.53439e-07
YFR020W	CSS2	21.663	-1.66932	0.0924263	1.15047e-74	1.19871e-73	-1.38527	0.103888	3.48457e-42	4.3194e-41	-0.238555	0.129367	0.0459443	0.0813602
YFR021W	ATG18	33.7072	0.25024	0.0633733	6.93481e-05	0.00010815	-0.332866	0.0724266	2.75335e-06	5.75799e-06	0.559111	0.0955535	7.71695e-10	5.08665e-09
YFR022W	ROG3	4.0978	2.48789	0.20305	4.83501e-37	2.38284e-36	1.59371	0.231943	8.89236e-14	3.1088e-13	0.542555	0.27384	0.00563438	0.0126851
YFR023W	PES4	3.52009	-0.885987	0.246758	7.22154e-05	0.000112455	-1.41285	0.294498	2.97964e-08	7.30149e-08	0.285956	0.281839	0.125301	0.191958
YFR025C	HIS2	30.0721	0.931221	0.0837384	2.03848e-29	8.20506e-29	0.599807	0.0925982	2.90352e-11	8.65334e-11	0.287684	0.118823	0.00936407	0.0198791
YFR026C	ULI1
YFR027W	ECO1	11.3628	-0.420629	0.127566	0.00069792	0.00100219	-0.624164	0.142711	3.34661e-06	6.97113e-06	0.175298	0.170424	0.232749	0.321053
YFR028C	CDC14	44.2722	-0.144614	0.0537486	0.00679113	0.00900663	-0.161487	0.0605589	0.00680118	0.0101348	0.0183239	0.0792105	0.811807	0.862274
YFR029W	PTR3	12.9366	1.02978	0.109539	7.94912e-22	2.51794e-21	0.0142334	0.118783	0.899844	0.916642	0.940549	0.173743	3.91996e-10	2.68413e-09
YFR030W	MET10	41.9108	1.24152	0.11634	1.00281e-27	3.86026e-27	1.12473	0.125302	1.24795e-20	6.26698e-20	0.0865065	0.15255	0.526082	0.621969
YFR031C	SMC2	36.6942	0.682609	0.0636439	3.32921e-27	1.26865e-26	0.280082	0.0702271	4.7676e-05	8.93588e-05	0.374139	0.0927684	2.46339e-05	8.80996e-05
YFR032C	RRT5	4.29755	-1.23305	0.323121	8.9837e-06	1.47903e-05	-1.32647	0.360354	5.01303e-06	1.02487e-05	0.0552544	0.292616	0.755125	0.819637
YFR033C	QCR6	396.67	-1.24378	0.0455055	1.28018e-165	5.74237e-164	-0.152573	0.0476011	0.00121563	0.00197918	-1.07972	0.0667535	4.83957e-61	5.12317e-59
YFR034C	PHO4	44.1511	-1.35706	0.0920114	1.55828e-50	1.00954e-49	-1.15539	0.0991809	9.52336e-33	8.23646e-32	-0.169499	0.125815	0.147044	0.219984
YFR035C	YFR035C
YFR036W	CDC26	35.9494	-0.0171637	0.0702074	0.805052	0.825003	-0.0105096	0.076741	0.888683	0.907894	-0.00591872	0.100757	0.950897	0.971294
YFR037C	RSC8	120.598	0.350831	0.0411063	1.136e-17	3.16967e-17	-0.220237	0.0452139	8.9772e-07	1.95702e-06	0.560862	0.0609728	6.12437e-21	9.88301e-20
YFR038W	IRC5	31.2561	1.52399	0.069231	6.2176e-109	1.23257e-107	1.23326	0.0794431	8.07582e-56	1.59497e-54	0.26138	0.101028	0.00651515	0.0144167
YFR039C	OSW7	44.2303	0.1132	0.0567654	0.0446853	0.054915	-0.139829	0.0644467	0.0273976	0.0377645	0.242623	0.0842105	0.002814	0.00679184
YFR040W	SAP155	81.2638	0.521273	0.0585695	3.46958e-19	1.01855e-18	0.0695512	0.0625343	0.258879	0.302416	0.42954	0.0847887	1.37134e-07	6.98606e-07
YFR041C	ERJ5	40.9928	0.399716	0.0654438	7.64212e-10	1.55277e-09	0.176967	0.0724804	0.0126621	0.0181873	0.204203	0.0949075	0.024427	0.0467433
YFR042W	KEG1	34.568	0.579161	0.0705026	1.17021e-16	3.16177e-16	0.786206	0.0800158	1.34138e-23	7.8193e-23	-0.195449	0.102223	0.0442281	0.0789542
YFR043C	IRC6	23.4562	0.0717578	0.0761611	0.340652	0.375484	0.293942	0.0861503	0.000447648	0.000762847	-0.208375	0.110427	0.0451245	0.0801557
YFR044C	DUG1	275.057	0.267253	0.0335603	1.46514e-15	3.7518e-15	0.119173	0.0363523	0.000980639	0.00161146	0.144653	0.0490931	0.00287421	0.00691824
YFR045W	YFR045W	14.8158	-0.813013	0.104705	2.41021e-15	6.12151e-15	-0.336636	0.115987	0.00232435	0.00367247	-0.396439	0.148395	0.00285233	0.00687808
YFR046C	CNN1	9.07566	0.133832	0.12508	0.271192	0.302895	0.215683	0.138148	0.0950117	0.12008	-0.0758301	0.168268	0.603419	0.692819
YFR047C	BNA6	34.3629	0.76102	0.0735082	1.40759e-25	5.07864e-25	0.347089	0.0822321	1.50364e-05	2.93464e-05	0.374592	0.107071	0.000208483	0.000637494
YFR048W	RMD8	22.2678	-0.359042	0.0815889	8.5359e-06	1.40793e-05	-0.304034	0.0913739	0.000594912	0.00100074	-0.0423515	0.116192	0.696999	0.771706
YFR049W	YMR31	65.8287	-0.853438	0.0600576	2.08216e-46	1.26097e-45	-0.516	0.0662526	2.79908e-15	1.07126e-14	-0.313673	0.0872536	0.000189794	0.000584396
YFR050C	PRE4	167.899	-0.0884979	0.0432327	0.0398571	0.0493021	0.306767	0.0470521	4.78038e-11	1.40961e-10	-0.386724	0.0633182	4.7661e-10	3.23009e-09
YFR051C	RET2	207.308	0.56386	0.0369053	6.08851e-53	4.15825e-52	0.318907	0.0400149	1.05295e-15	4.12214e-15	0.238072	0.053896	7.45169e-06	2.90655e-05
YFR052W	RPN12	133.042	0.199359	0.0391308	3.21006e-07	5.70546e-07	0.381056	0.0433733	9.01495e-19	4.11701e-18	-0.178745	0.0577056	0.001656	0.00420192
YFR053C	HXK1	68.2047	-1.28796	0.0938983	5.05268e-44	2.93244e-43	-2.03396	0.104547	1.56785e-86	6.10194e-85	0.667994	0.139085	9.63116e-08	5.01749e-07
YFR054C	YFR054C
YFR055W	IRC7	138.633	-5.12514	0.103794	0	0	-4.30953	0.114329	0	0	-0.722162	0.154837	1.34122e-07	6.84576e-07
YFR056C	YFR056C
YFR057W	YFR057W
YGL001C	ERG26	186.119	-1.33694	0.0395078	2.76088e-252	3.17682e-250	-1.06545	0.0430568	1.91507e-136	2.25255e-134	-0.262515	0.0576579	3.80872e-06	1.5664e-05
YGL002W	ERP6	52.5236	0.00793283	0.05738	0.889324	0.902453	-0.240272	0.0635568	0.000121606	0.00021968	0.238769	0.0838201	0.00321433	0.00763963
YGL003C	CDH1	17.902	0.224263	0.0880777	0.00977891	0.0128182	0.12174	0.0974316	0.195543	0.233939	0.0863556	0.12464	0.454937	0.55305
YGL004C	RPN14	8.24358	0.296085	0.123964	0.0141271	0.0182958	0.431236	0.140074	0.00102197	0.00167729	-0.122507	0.167439	0.400144	0.498344
YGL005C	COG7	23.9296	0.26976	0.0783617	0.000498911	0.000728279	0.230722	0.0877872	0.00676714	0.0100869	0.0295693	0.112244	0.779549	0.837628
YGL006W	PMC1	43.9466	0.770192	0.067803	2.25426e-30	9.2638e-30	0.247189	0.0743536	0.0006779	0.00113244	0.486243	0.0991802	2.27798e-07	1.12161e-06
YGL007W	BRP1
YGL008C	PMA1	192.399	-0.538584	0.0761487	9.07994e-13	2.07245e-12	-0.143024	0.079159	0.0641334	0.083323	-0.36176	0.107095	0.000351711	0.00103422
YGL009C	LEU1	217.091	2.01982	0.0611454	1.79351e-241	1.89861e-239	0.109152	0.0642468	0.084238	0.107155	1.89996	0.0892417	4.46956e-101	1.8198e-98
YGL010W	MPO1	23.8548	-0.475348	0.0856739	1.93109e-08	3.64785e-08	-0.441799	0.0962461	2.17197e-06	4.58201e-06	-0.0213845	0.121257	0.849706	0.893151
YGL011C	SCL1	225.72	0.151468	0.0341351	8.64336e-06	1.42477e-05	0.226365	0.0373273	1.06018e-09	2.88808e-09	-0.0744936	0.0501152	0.13236	0.200909
YGL012W	ERG4	191.27	1.01617	0.0447054	3.49616e-115	7.49197e-114	0.586297	0.0477906	4.51601e-35	4.26083e-34	0.414538	0.0647384	6.05838e-11	4.47239e-10
YGL013C	PDR1	38.3207	-0.300436	0.0656335	3.97565e-06	6.66554e-06	-0.48786	0.0733795	1.3121e-11	3.99825e-11	0.179394	0.0951602	0.0488891	0.0857707
YGL014W	PUF4	72.7862	-0.339027	0.0498152	8.21797e-12	1.80414e-11	-0.475621	0.0544296	1.09577e-18	4.97846e-18	0.133692	0.0723026	0.0579149	0.0990128
YGL015C	YGL015C	2.40578	0.357239	0.268041	0.133466	0.155568	0.018723	0.26243	0.930199	0.941945	0.173668	0.289095	0.340777	0.439141
YGL016W	KAP122	49.7075	-0.178466	0.0537387	0.000835518	0.0011946	-0.133378	0.0596119	0.0232433	0.0323329	-0.0410495	0.0785751	0.590449	0.68103
YGL017W	ATE1	28.0706	-0.833618	0.0754358	6.07161e-29	2.41632e-28	-0.850037	0.0856452	3.84173e-24	2.2899e-23	0.0210674	0.108111	0.836877	0.883444
YGL018C	JAC1	28.5527	-0.408947	0.0747472	3.33048e-08	6.21589e-08	-0.460792	0.0837204	1.75162e-08	4.36914e-08	0.053554	0.107098	0.597947	0.68773
YGL019W	CKB1	109.615	0.465599	0.0418788	7.08814e-29	2.81875e-28	0.368982	0.0464048	1.09557e-15	4.28276e-15	0.0916848	0.0615814	0.129357	0.197088
YGL020C	GET1	116.159	0.503319	0.0393951	1.43778e-37	7.26159e-37	0.28376	0.0437513	6.29267e-11	1.84323e-10	0.212115	0.0581877	0.000209744	0.000640978
YGL021W	ALK1	36.8248	-0.33833	0.0647344	1.4068e-07	2.55268e-07	-0.284146	0.0723286	6.0673e-05	0.000112602	-0.0460336	0.0938167	0.608405	0.696731
YGL022W	STT3	284.399	0.815757	0.0289363	2.21114e-175	1.13627e-173	0.24771	0.0315278	3.02439e-15	1.15582e-14	0.560887	0.0427284	3.72132e-40	1.90951e-38
YGL023C	PIB2	51.4161	0.614129	0.0594274	2.52074e-25	9.00896e-25	-0.133544	0.0654867	0.0380657	0.0513984	0.724724	0.0892782	1.75446e-17	2.19535e-16
YGL024W	YGL024W
YGL025C	PGD1	14.3266	0.4753	0.103045	2.64327e-06	4.46564e-06	0.414891	0.115292	0.0001662	0.000296095	0.039826	0.142257	0.757265	0.820849
YGL026C	TRP5	150.949	0.834203	0.0495936	4.81289e-64	4.05002e-63	0.00710817	0.0530657	0.892297	0.910829	0.810038	0.0734551	6.38249e-30	1.89789e-28
YGL027C	CWH41	99.573	1.06584	0.0483225	1.08675e-108	2.13835e-107	0.466724	0.0530374	6.48886e-19	2.99438e-18	0.577563	0.0714016	8.4479e-17	1.00483e-15
YGL028C	SCW11	57.3904	1.70923	0.074222	3.80244e-119	8.75057e-118	-0.227164	0.0791341	0.00325522	0.0050483	1.93502	0.109172	2.5413e-71	3.73642e-69
YGL029W	CGR1	215.938	0.000436794	0.0496618	0.992947	0.993686	0.0722313	0.052659	0.165568	0.200814	-0.0699177	0.071243	0.31538	0.41326
YGL030W	RPL30	4803.26	-0.121704	0.0358206	0.000656295	0.000945758	0.152911	0.037281	3.70143e-05	6.99203e-05	-0.270371	0.0513259	9.6699e-08	5.03272e-07
YGL031C	RPL24A	2384.9	-0.624748	0.0265147	4.69337e-123	1.15009e-121	-0.18077	0.0277564	6.40087e-11	1.87285e-10	-0.439087	0.0382864	7.93168e-31	2.52906e-29
YGL032C	AGA2	0.948231	0.925207	0.383336	0.00269624	0.0036972	-0.56316	0.382603	0.0371861	0.0502877	1.23389	0.69838	0.000253422	0.000764745
YGL033W	HOP2	0.390494	1.08984	0.552623	0.00404658	0.00547509	0.607571	0.502697	0.0424525	0.0569441	0.0781371	0.372074	0.754485	0.819178
YGL034C	YGL034C
YGL035C	MIG1	48.4866	-0.629462	0.0707724	2.88841e-19	8.50367e-19	-1.18897	0.0780214	7.36768e-54	1.37799e-52	0.523543	0.103374	7.97803e-08	4.22277e-07
YGL036W	YGL036W	35.2466	-0.181567	0.0775388	0.0178208	0.022828	-0.0276806	0.0829424	0.732131	0.768578	-0.139655	0.109429	0.176063	0.255242
YGL037C	PNC1	147.745	0.686171	0.0672245	7.84978e-25	2.74976e-24	1.05933	0.0726487	2.04874e-49	3.37819e-48	-0.349728	0.0960245	0.000136499	0.000431593
YGL038C	OCH1	29.3176	0.352863	0.0787557	5.93777e-06	9.88011e-06	-0.16667	0.0865564	0.0474723	0.0632765	0.484135	0.115304	6.47023e-06	2.54246e-05
YGL039W	YGL039W	41.7216	0.362949	0.0823222	8.17757e-06	1.34967e-05	-0.325452	0.0895321	0.000179965	0.000319542	0.64911	0.121826	7.91987e-09	4.76362e-08
YGL040C	HEM2	119.441	-0.821325	0.0393468	2.69134e-97	4.35635e-96	-0.380121	0.0428631	4.31151e-19	2.00711e-18	-0.429194	0.0577494	3.96546e-14	3.77504e-13
YGL041C	YGL041C
YGL042C	YGL042C
YGL043W	DST1	84.9428	-0.437856	0.0403567	1.44351e-27	5.5406e-27	-0.208925	0.0454217	3.49186e-06	7.25369e-06	-0.220977	0.0600619	0.000182102	0.000563006
YGL044C	RNA15	29.0373	-0.912025	0.0748598	8.34275e-35	3.84653e-34	-1.0857	0.0848492	8.83676e-39	9.62406e-38	0.161399	0.107453	0.112508	0.175355
YGL045W	RIM8	10.6473	0.0913398	0.139105	0.497068	0.530975	-0.0454013	0.148458	0.742013	0.778134	0.107983	0.182626	0.486108	0.582384
YGL047W	ALG13	26.3238	-0.553151	0.0741374	4.98243e-14	1.19655e-13	-0.221599	0.0844632	0.00697846	0.0103843	-0.297822	0.108729	0.00379833	0.00885703
YGL048C	RPT6	185.017	-0.139435	0.0399334	0.000458685	0.000673273	-0.139915	0.0435877	0.00121611	0.00197936	0.00151143	0.0584208	0.979018	0.992404
YGL049C	TIF4632	54.8317	-0.252519	0.0577003	1.06389e-05	1.74178e-05	-0.159175	0.0631067	0.0103767	0.0151263	-0.085903	0.0834589	0.287053	0.382809
YGL050W	TYW3	26.1534	-1.17256	0.0905259	2.08328e-39	1.09938e-38	-1.05739	0.100215	2.78336e-27	1.8985e-26	-0.0933123	0.125297	0.422294	0.520662
YGL051W	MST27
YGL052W	YGL052W
YGL053W	PRM8
YGL054C	ERV14	134.819	-1.05766	0.0500125	3.9239e-100	6.59339e-99	-0.718254	0.0539236	3.61572e-41	4.35945e-40	-0.322768	0.0722454	4.63182e-06	1.86435e-05
YGL055W	OLE1	313.657	-0.485551	0.061381	1.70112e-15	4.34976e-15	0.347653	0.0642144	3.8201e-08	9.24968e-08	-0.813776	0.0899415	3.50849e-21	5.76721e-20
YGL056C	SDS23	21.1838	0.0489007	0.0925861	0.591514	0.622938	0.346632	0.101141	0.000375346	0.000644406	-0.270706	0.130216	0.0239563	0.0459525
YGL057C	GEP7	17.9698	-1.82246	0.108367	2.01429e-65	1.74209e-64	-1.09491	0.119637	2.73428e-21	1.42868e-20	-0.615685	0.157266	8.33587e-06	3.20187e-05
YGL058W	RAD6	54.3123	-0.20477	0.0597849	0.000561694	0.000814087	-0.00822036	0.0651624	0.898004	0.914944	-0.185591	0.0865476	0.0263458	0.0501253
YGL059W	PKP2	10.7754	0.800198	0.114383	8.05098e-13	1.84236e-12	0.546853	0.129492	8.59502e-06	1.71673e-05	0.191007	0.156721	0.167428	0.244873
YGL060W	YBP2	18.6702	0.546294	0.0850462	7.81736e-11	1.64784e-10	0.516671	0.0964753	3.42842e-08	8.35094e-08	0.0175172	0.120909	0.876651	0.913948
YGL061C	DUO1	18.6384	0.220147	0.0873722	0.0105838	0.0138356	0.385827	0.0996449	6.06337e-05	0.000112569	-0.154817	0.124972	0.18176	0.261855
YGL062W	PYC1	102.851	0.582104	0.0797602	1.59081e-13	3.75397e-13	1.13249	0.0864451	1.44234e-40	1.68528e-39	-0.50699	0.114748	2.21481e-06	9.42362e-06
YGL063W	PUS2	15.5779	-1.21165	0.126574	8.30587e-23	2.72723e-22	-1.53867	0.142025	4.17183e-29	3.10133e-28	0.258694	0.168856	0.0780432	0.129048
YGL064C	MRH4	19.9981	-0.185561	0.0897651	0.0358005	0.0445654	0.383558	0.0993916	6.42927e-05	0.000119028	-0.525039	0.131419	1.21324e-05	4.55117e-05
YGL065C	ALG2	36.39	-0.930136	0.0629284	4.01402e-50	2.5753e-49	-1.04139	0.0718745	8.38937e-49	1.35381e-47	0.106975	0.0918842	0.224775	0.312126
YGL066W	SGF73	17.9945	-0.778273	0.0908943	3.62709e-18	1.02939e-17	-1.23758	0.105901	4.94283e-33	4.32436e-32	0.407744	0.13261	0.000736575	0.00201587
YGL067W	NPY1	37.4868	0.721633	0.0668382	1.38314e-27	5.31274e-27	0.560375	0.0739029	1.21732e-14	4.50577e-14	0.144113	0.0959814	0.116511	0.180267
YGL068W	MNP1	150.432	-0.876398	0.0494508	6.88693e-71	6.54444e-70	0.313668	0.0528122	1.91291e-09	5.12142e-09	-1.18594	0.0733487	6.14807e-61	6.38074e-59
YGL069C	YGL069C
YGL070C	RPB9	47.8482	-0.162303	0.0665797	0.0139074	0.0180244	0.280314	0.0730149	8.83573e-05	0.000161434	-0.420964	0.0970056	5.39022e-06	2.14353e-05
YGL071W	AFT1	33.8636	1.5286	0.0737685	6.2699e-97	1.00565e-95	0.900732	0.0818345	3.45275e-29	2.58492e-28	0.575143	0.108387	1.51131e-08	8.74248e-08
YGL072C	YGL072C
YGL073W	HSF1	43.3301	0.461941	0.0603526	1.34512e-14	3.30996e-14	-0.043508	0.0672795	0.510647	0.559713	0.481625	0.0897547	2.23972e-08	1.27334e-07
YGL074C	YGL074C
YGL075C	MPS2	3.12072	0.395703	0.205992	0.0390691	0.0484164	0.519207	0.232095	0.00901075	0.0132116	-0.104266	0.242081	0.555937	0.648015
YGL076C	RPL7A
YGL077C	HNM1	33.1571	0.860928	0.080062	1.46549e-27	5.61682e-27	0.496139	0.0869506	4.95971e-09	1.28622e-08	0.323362	0.113497	0.00238124	0.00584868
YGL078C	DBP3	173.498	-0.305193	0.0372634	2.21029e-16	5.91759e-16	-0.172823	0.0403622	1.62473e-05	3.16515e-05	-0.128226	0.0543781	0.016814	0.0335582
YGL079W	KXD1	23.4818	0.203192	0.0777148	0.00816265	0.0107421	0.305021	0.087867	0.000350769	0.000604173	-0.0984355	0.111852	0.350106	0.449457
YGL080W	MPC1	94.5159	0.113673	0.0454145	0.0119331	0.0155226	0.177119	0.0499489	0.000339994	0.000587141	-0.0629028	0.06647	0.334012	0.432522
YGL081W	YGL081W	1.11913	0.677478	0.319874	0.0125922	0.0163479	-0.133402	0.307496	0.56855	0.615532	0.428352	0.389693	0.030776	0.0574796
YGL082W	YGL082W	16.4925	-0.373902	0.0923924	4.01507e-05	6.3647e-05	-0.425093	0.103891	2.18136e-05	4.20923e-05	0.0538495	0.129806	0.652815	0.735024
YGL083W	SCY1	23.0917	0.156725	0.0842232	0.0592088	0.071846	0.205518	0.0918655	0.0208285	0.0291423	-0.0489666	0.118424	0.65818	0.739409
YGL084C	GUP1	52.2723	-0.210313	0.0555385	0.000138974	0.00021223	-0.423849	0.0616258	3.17675e-12	1.00746e-11	0.206347	0.0810275	0.00850935	0.0182792
YGL085W	LCL3	13.7401	-0.260678	0.0998169	0.00783159	0.0103322	0.0265478	0.109683	0.800615	0.829774	-0.249076	0.140826	0.0510294	0.0890532
YGL086W	MAD1	38.6418	0.455585	0.0626702	2.51489e-13	5.87436e-13	0.141182	0.0699584	0.0396493	0.0533733	0.292429	0.0918928	0.00089337	0.00240764
YGL087C	MMS2	52.8864	0.357908	0.0542145	3.2495e-11	6.97188e-11	-0.0822576	0.0605931	0.168511	0.204056	0.423133	0.0805556	5.58405e-08	3.04391e-07
YGL088W	YGL088W
YGL089C	MF(ALPHA)2	1.08416	-0.130274	0.365669	0.657245	0.685073	0.460762	0.406857	0.0904836	0.114659	-0.290364	0.399335	0.0554225	0.0956164
YGL090W	LIF1	3.33001	-0.875263	0.211143	7.86266e-06	1.30013e-05	-0.481429	0.226097	0.0133795	0.0191554	-0.205233	0.245079	0.254721	0.346288
YGL091C	NBP35	32.7878	0.0380801	0.066336	0.562568	0.595654	0.37451	0.0755038	4.0979e-07	9.21028e-07	-0.319158	0.0978643	0.000621073	0.00172654
YGL092W	NUP145	63.6565	-0.535909	0.0499144	4.14946e-27	1.57781e-26	-0.559985	0.0554166	1.91281e-24	1.15974e-23	0.0259945	0.0729413	0.714647	0.786736
YGL093W	SPC105	17.5832	0.637589	0.090775	1.03235e-12	2.34971e-12	0.360805	0.102283	0.000249756	0.000437589	0.233269	0.129051	0.0492459	0.0862822
YGL094C	PAN2	41.6377	-0.354891	0.0639206	2.25777e-08	4.24979e-08	-0.603351	0.0708387	5.10901e-18	2.2535e-17	0.236918	0.092526	0.00760466	0.0165644
YGL095C	VPS45	23.3967	0.844611	0.0801751	1.61329e-26	5.99635e-26	0.589703	0.0908128	2.70337e-11	8.07501e-11	0.220199	0.115123	0.041195	0.0740642
YGL096W	TOS8	4.18479	1.90926	0.186045	8.84637e-27	3.3232e-26	3.90431	0.250118	5.21202e-56	1.03323e-54	-1.79681	0.318916	2.07133e-11	1.60286e-10
YGL097W	SRM1	99.9594	0.242313	0.0433531	2.03089e-08	3.83226e-08	0.202412	0.0477313	1.85973e-05	3.60438e-05	0.0369484	0.0635302	0.553801	0.646277
YGL098W	USE1	12.8197	-2.05052	0.120358	2.6516e-67	2.33526e-66	-1.47029	0.13687	1.27834e-28	9.30705e-28	-0.456834	0.169098	0.00182879	0.00460263
YGL099W	LSG1	122.714	0.0157565	0.039622	0.689918	0.715746	-0.223697	0.0437288	2.51341e-07	5.7541e-07	0.235	0.0584054	4.34101e-05	0.000149395
YGL100W	SEH1	89.6809	0.171053	0.0443106	0.000106061	0.000163573	0.358481	0.0494917	2.65964e-13	9.00094e-13	-0.183489	0.0654063	0.00417925	0.00968086
YGL101W	YGK1	42.3032	-0.747063	0.0625498	2.53829e-33	1.12617e-32	0.105457	0.0688878	0.11893	0.147527	-0.828141	0.0948287	4.89423e-20	7.42268e-19
YGL102C	YGL102C
YGL103W	RPL28	5039.69	-0.376191	0.0423485	5.09761e-19	1.48823e-18	-0.0732957	0.0439329	0.0927457	0.117357	-0.294347	0.0604728	7.32446e-07	3.33635e-06
YGL104C	VPS73	15.1998	-0.841794	0.102917	7.7128e-17	2.09676e-16	-0.923861	0.118191	4.7975e-16	1.91791e-15	0.0786409	0.142444	0.54326	0.636966
YGL105W	ARC1	493.675	0.493102	0.0264513	9.68327e-78	1.05677e-76	0.245437	0.0284759	5.20516e-18	2.294e-17	0.244177	0.0386774	2.01812e-10	1.41108e-09
YGL106W	MLC1	199.937	0.386464	0.0289676	1.03449e-40	5.65654e-40	0.102765	0.0322603	0.00137922	0.00222976	0.279292	0.0431525	6.51686e-11	4.79746e-10
YGL107C	RMD9	270.79	0.15238	0.125935	0.213192	0.241944	-3.18181	0.136658	4.78777e-122	4.08736e-120	3.31569	0.189574	1.26253e-68	1.62989e-66
YGL108C	YGL108C	37.4649	-1.50291	0.0664279	7.65068e-115	1.62631e-113	-0.954776	0.0758139	1.82174e-37	1.89068e-36	-0.505648	0.0987528	7.65059e-08	4.08211e-07
YGL109W	YGL109W
YGL110C	CUE3	24.365	0.431474	0.0792836	3.78833e-08	7.05299e-08	0.337809	0.0881183	7.95585e-05	0.000145912	0.0777916	0.112747	0.463712	0.561783
YGL111W	NSA1	76.9692	-0.235004	0.0399837	3.73131e-09	7.31475e-09	-0.105309	0.0451185	0.018613	0.0262577	-0.125166	0.0596074	0.0329569	0.0611001
YGL112C	TAF6	53.4232	0.921387	0.0485843	7.09866e-81	8.11516e-80	0.687027	0.0554468	6.76891e-36	6.57391e-35	0.221064	0.072223	0.00167724	0.00425377
YGL113W	SLD3	19.3924	0.786589	0.089442	4.60716e-19	1.34727e-18	0.426284	0.0989537	8.39346e-06	1.67964e-05	0.309501	0.126796	0.00814355	0.017579
YGL114W	YGL114W	38.015	-0.119709	0.0651013	0.0636295	0.0770688	-0.432809	0.0730707	1.60648e-09	4.32069e-09	0.297634	0.0952069	0.00104334	0.00276536
YGL115W	SNF4	102.712	-0.507747	0.0433706	7.49332e-32	3.20114e-31	-0.236232	0.0477823	6.00435e-07	1.3331e-06	-0.261365	0.0637199	2.90298e-05	0.000102505
YGL116W	CDC20	28.3621	-0.618195	0.0719555	4.32998e-18	1.22428e-17	-0.562603	0.0811146	1.43246e-12	4.64869e-12	-0.0444349	0.103602	0.651719	0.733946
YGL117W	YGL117W	20.3394	-1.64274	0.121737	3.25125e-43	1.86042e-42	-1.42816	0.135446	1.15861e-27	8.0585e-27	-0.160081	0.160912	0.258423	0.350278
YGL118C	YGL118C
YGL119W	COQ8	21.6928	-0.85058	0.0775791	1.50669e-28	5.93372e-28	-0.624528	0.0868942	1.89895e-13	6.50058e-13	-0.196571	0.110904	0.0599637	0.102021
YGL120C	PRP43	138.105	0.346003	0.0347454	1.88983e-23	6.33493e-23	0.208523	0.0385592	5.2712e-08	1.26533e-07	0.133464	0.0514234	0.00860102	0.0184537
YGL121C	GPG1	5.21827	-0.602704	0.184301	0.000530203	0.000771191	-1.07689	0.21433	2.50832e-08	6.18089e-08	0.327571	0.234633	0.0651399	0.109804
YGL122C	NAB2	98.7196	0.315141	0.0441283	7.73945e-13	1.77261e-12	0.464154	0.0489817	1.26182e-21	6.72591e-21	-0.146372	0.0648739	0.0214184	0.0416027
YGL123W	RPS2	3421.87	-0.0771814	0.0362417	0.0327042	0.0408263	0.0452637	0.0377069	0.227393	0.268359	-0.120334	0.0518735	0.0188486	0.0371566
YGL124C	MON1	21.6374	0.585475	0.08914	2.75102e-11	5.91675e-11	0.569336	0.100083	4.37677e-09	1.14063e-08	0.00508602	0.125276	0.965091	0.982541
YGL125W	MET13	2.63122	0.811107	0.228858	0.000109372	0.00016863	0.993091	0.263353	1.04921e-05	2.07218e-05	-0.123436	0.253434	0.489299	0.585809
YGL126W	SCS3	54.9925	-0.0493526	0.0628237	0.428495	0.463619	-0.0309058	0.0688569	0.647737	0.689973	-0.0167422	0.0908315	0.847767	0.891871
YGL127C	SOH1	83.6579	1.06687	0.0459208	2.79811e-120	6.55327e-119	1.1135	0.0519673	3.54431e-103	2.10787e-101	-0.0466106	0.0678595	0.483062	0.579653
YGL128C	CWC23	22.1394	-0.23498	0.0809201	0.00328421	0.00447793	-0.583647	0.0919348	7.1485e-11	2.08354e-10	0.32266	0.117445	0.00322662	0.0076654
YGL129C	RSM23	73.8427	-0.345472	0.0631264	3.58256e-08	6.67929e-08	0.0351412	0.0670489	0.593984	0.639276	-0.3604	0.0906461	3.38351e-05	0.000118055
YGL130W	CEG1	52.6265	0.119649	0.0575395	0.036278	0.0450961	-0.159516	0.064063	0.011363	0.0164643	0.267737	0.0844541	0.00101945	0.00271153
YGL131C	SNT2	4.61233	-0.734636	0.171577	6.64497e-06	1.10153e-05	-0.330793	0.183199	0.0442017	0.0591703	-0.258904	0.215899	0.128838	0.196533
YGL132W	YGL132W
YGL133W	ITC1	27.6312	0.240813	0.0702949	0.00054454	0.000790307	-0.0965005	0.077601	0.203242	0.24207	0.31569	0.102224	0.00114643	0.00301276
YGL134W	PCL10	14.7343	-0.0408584	0.0926061	0.653954	0.682449	-0.165845	0.103481	0.095319	0.120354	0.115084	0.13116	0.339923	0.438298
YGL135W	RPL1B	2019.02	-0.669366	0.0346295	1.36206e-83	1.62008e-82	-0.435843	0.0362113	1.17973e-33	1.06016e-32	-0.227892	0.0496607	3.45752e-06	1.43208e-05
YGL136C	MRM2	22.988	-0.614934	0.080229	9.07388e-15	2.2464e-14	-0.456809	0.0894961	1.57621e-07	3.67366e-07	-0.134626	0.114111	0.209206	0.29356
YGL137W	SEC27	167.932	0.456786	0.0349303	3.11788e-39	1.64045e-38	-0.121452	0.0385113	0.00150975	0.00243335	0.570315	0.051964	7.92068e-29	2.17224e-27
YGL138C	YGL138C	1.43716	-0.768283	0.317446	0.00450225	0.00606371	-0.865007	0.368016	0.00176512	0.00282345	0.0776532	0.302366	0.600239	0.690066
YGL139W	FLC3	25.5462	0.037378	0.0867421	0.66209	0.689444	-0.069493	0.0930564	0.440781	0.489828	0.0976845	0.121429	0.387316	0.485912
YGL140C	YGL140C	46.1006	0.162188	0.0597478	0.00624737	0.00830629	-0.188511	0.065654	0.00348113	0.00537974	0.335721	0.0871555	6.15126e-05	0.000207644
YGL141W	HUL5	14.5782	0.279015	0.1015	0.00510622	0.00684927	0.206164	0.113	0.0558136	0.0733602	0.0538604	0.141191	0.673891	0.752036
YGL142C	GPI10	26.9753	0.736328	0.0736542	5.83165e-24	1.98501e-23	0.7673	0.0825168	2.3561e-21	1.23596e-20	-0.0340695	0.105216	0.732699	0.802105
YGL143C	MRF1	24.3444	-0.788124	0.0873351	5.77945e-20	1.73024e-19	-0.0997414	0.0936581	0.271267	0.315218	-0.629048	0.128616	8.91448e-08	4.65329e-07
YGL144C	ROG1	13.4695	0.32571	0.108421	0.00216486	0.00299258	-0.184667	0.119702	0.104155	0.130669	0.448117	0.156073	0.00117652	0.0030813
YGL145W	TIP20	27.6666	0.900953	0.0776321	8.73739e-32	3.7206e-31	0.894842	0.0863431	3.6059e-26	2.35098e-25	-0.000240078	0.109732	0.998147	1
YGL146C	RRT6	1.25173	-2.1448	0.377258	6.07521e-11	1.28882e-10	-2.32234	0.423942	1.07782e-10	3.09712e-10	0.0641711	0.30821	0.379288	0.477879
YGL147C	RPL9A	1901.07	-0.207866	0.0365136	1.1417e-08	2.18395e-08	0.185742	0.0380893	9.2782e-07	2.01848e-06	-0.387477	0.0524574	7.21264e-14	6.74497e-13
YGL148W	ARO2	432.687	0.181779	0.0298125	1.00305e-09	2.02331e-09	-0.122957	0.0320876	0.00011901	0.000215209	0.301228	0.0435912	3.0947e-12	2.58502e-11
YGL149W	YGL149W
YGL150C	INO80	58.0032	0.705495	0.0562849	1.96586e-36	9.53737e-36	0.275204	0.0618678	6.26921e-06	1.26798e-05	0.406966	0.0823792	2.96891e-07	1.43905e-06
YGL151W	NUT1	42.9696	0.307836	0.0594831	1.9137e-07	3.44648e-07	0.029968	0.0663791	0.646215	0.688628	0.26189	0.0874469	0.00186931	0.00469813
YGL152C	YGL152C
YGL153W	PEX14	26.4834	-0.404073	0.0710454	9.6734e-09	1.85445e-08	-0.88779	0.0825241	5.56539e-28	3.92768e-27	0.453405	0.106124	5.79869e-06	2.29734e-05
YGL154C	LYS5	11.3679	-0.546726	0.114093	9.57073e-07	1.65063e-06	-1.0546	0.131655	6.33683e-17	2.65145e-16	0.431162	0.162855	0.00249368	0.00608532
YGL155W	CDC43	17.2744	2.0757	0.103677	2.07415e-91	3.00781e-90	2.47624	0.119851	1.30127e-97	6.68699e-96	-0.334617	0.146211	0.0111856	0.0233276
YGL156W	AMS1	4.81503	0.331777	0.184458	0.0566775	0.068885	0.705221	0.215615	0.000205793	0.000364058	-0.272062	0.234537	0.124393	0.190734
YGL157W	ARI1	42.6475	-1.45888	0.0808621	3.27631e-74	3.35426e-73	-1.0279	0.0890285	4.76641e-32	3.99186e-31	-0.381508	0.115213	0.000404924	0.00117375
YGL158W	RCK1	3.53922	-0.388566	0.241545	0.0762565	0.0915044	0.455134	0.259987	0.0339626	0.0462357	-0.599447	0.35042	0.00611559	0.0136008
[truncated: 4,651 more rows]

## Sheet: YPD_to_Low_N.60
ORF	GeneName	baseMean	log2FoldChange_sp	lfcSE_sp	pvalue_sp	padj_sp	log2FoldChange_cis	lfcSE_cis	pvalue_cis	padj_cis	log2FoldChange_trans	lfcSE_trans	pvalue_trans	padj_trans
YAL001C	TFC3	26.1748	1.2974	0.0946703	1.38645e-43	9.54154e-43	0.347676	0.0969821	0.000238743	0.00046727	0.903846	0.13593	3.96814e-12	2.79986e-11
YAL002W	VPS8	16.4365	1.21429	0.118122	1.64264e-25	6.4371e-25	0.172673	0.118313	0.121059	0.156554	0.97938	0.168681	5.28086e-10	2.95884e-09
YAL003W	EFB1	482.896	-1.12257	0.0788103	1.23469e-46	9.31899e-46	0.0955899	0.078803	0.198582	0.244189	-1.20406	0.112618	5.34601e-28	1.18191e-26
YAL004W	YAL004W
YAL005C	SSA1	193.116	0.562095	0.128862	9.35659e-06	1.53655e-05	0.116874	0.125647	0.319781	0.376305	0.40167	0.175647	0.0151709	0.0254334
YAL007C	ERP2	83.6325	-0.622169	0.0582213	8.11709e-27	3.31557e-26	-0.355951	0.05956	1.63488e-09	5.38133e-09	-0.257644	0.0827009	0.00161114	0.00328796
YAL008W	FUN14	46.6566	-0.571401	0.0831121	4.50799e-12	1.0319e-11	-1.23629	0.0860711	1.2327e-48	3.28679e-47	0.645396	0.117609	1.64945e-08	7.41695e-08
YAL009W	SPO7	23.5407	0.754222	0.0991709	1.6029e-14	4.11863e-14	0.0859656	0.100643	0.364528	0.422957	0.630656	0.140483	2.90675e-06	9.43314e-06
YAL010C	MDM10	13.876	0.0215257	0.119232	0.850556	0.865896	-0.406617	0.127865	0.000893363	0.00162614	0.414403	0.172466	0.0108636	0.0187944
YAL011W	SWC3	10.0959	-0.658891	0.132081	3.91055e-07	6.96288e-07	-0.446183	0.136232	0.000578922	0.00107933	-0.172154	0.182508	0.315404	0.378371
YAL012W	CYS3	1889.12	-0.718302	0.0961755	4.83624e-14	1.21905e-13	-0.163559	0.0959391	0.0733094	0.0993887	-0.52367	0.133317	4.88687e-05	0.000130366
YAL013W	DEP1	55.3209	0.664125	0.0762626	1.99923e-18	6.04095e-18	0.299724	0.0773443	8.31757e-05	0.000171125	0.347956	0.107427	0.000923944	0.00197919
YAL014C	SYN8	35.9264	-0.338727	0.0964621	0.000391972	0.000575644	-0.230851	0.0985092	0.0151468	0.0232347	-0.095437	0.134693	0.463848	0.52781
YAL015C	NTG1	25.0195	1.89848	0.114242	6.96813e-64	8.40293e-63	1.55061	0.119054	1.00595e-40	2.01418e-39	0.315103	0.157107	0.0357205	0.0553058
YAL016W	TPD3	106.948	-0.222718	0.0482109	3.66274e-06	6.18539e-06	-0.127658	0.0505297	0.00974745	0.0153608	-0.0922641	0.0690727	0.17796	0.230643
YAL017W	PSK1	49.9044	1.42576	0.0886008	2.64092e-59	2.85974e-58	0.606311	0.0887498	2.89732e-12	1.16729e-11	0.777372	0.124452	9.99209e-11	6.10807e-10
YAL018C	LDS1	1.3603	0.141421	0.380533	0.664488	0.694324	-0.774505	0.429958	0.00776698	0.0123833	0.723945	0.521353	0.0397047	0.06083
YAL019W	FUN30	22.6721	-1.00071	0.103929	2.08136e-22	7.37721e-22	-0.651379	0.109	6.45645e-10	2.17995e-09	-0.310905	0.146428	0.0269523	0.0429456
YAL020C	ATS1	43.8801	1.41093	0.0746317	9.96343e-81	1.93648e-79	0.45424	0.0780163	3.29871e-09	1.06336e-08	0.924886	0.108169	1.52841e-18	1.81833e-17
YAL021C	CCR4	28.9543	-0.617461	0.0872912	1.03859e-12	2.45031e-12	-0.447647	0.0890781	2.8869e-07	7.75197e-07	-0.153468	0.122571	0.197966	0.253111
YAL022C	FUN26	57.2102	0.93716	0.0767228	1.04028e-34	5.55866e-34	-0.112186	0.0792463	0.13485	0.17262	1.03325	0.110555	5.7317e-22	8.47142e-21
YAL023C	PMT2	102.697	0.153959	0.0584454	0.00736722	0.00976529	0.0411837	0.05814	0.449556	0.50882	0.107632	0.0821957	0.185228	0.238805
YAL024C	LTE1	18.148	-0.245601	0.107088	0.0187391	0.0239474	-0.345579	0.109069	0.00106878	0.00192365	0.104246	0.148456	0.464544	0.528489
YAL025C	MAK16	63.4236	-0.678839	0.107066	1.44509e-10	3.07815e-10	-0.0876039	0.107531	0.386509	0.445032	-0.551967	0.150251	0.000126165	0.000314436
YAL026C	DRS2	44.0184	0.423388	0.0728999	5.32904e-09	1.05546e-08	-0.185121	0.0756891	0.0119813	0.0185994	0.596341	0.104016	4.58866e-09	2.23576e-08
YAL027W	SAW1	18.0066	-0.808336	0.11882	5.23277e-12	1.19368e-11	-0.701948	0.12249	2.21966e-09	7.21221e-09	-0.077818	0.164026	0.617949	0.672582
YAL028W	FRT2	9.48554	2.64533	0.22593	3.60855e-34	1.8995e-33	0.396781	0.205457	0.0297828	0.0432834	2.05221	0.319431	1.42384e-12	1.06707e-11
YAL029C	MYO4	71.7555	0.592314	0.0571004	2.34247e-25	9.12568e-25	0.342722	0.0597621	7.17057e-09	2.24997e-08	0.241364	0.0820894	0.00295137	0.00571324
YAL030W	SNC1	142.88	0.97265	0.0546859	3.37904e-71	5.02218e-70	0.849254	0.055656	1.4899e-53	4.65024e-52	0.11688	0.0772647	0.126356	0.170988
YAL031C	GIP4	22.3654	0.455622	0.108064	2.0177e-05	3.2521e-05	-0.0381398	0.105644	0.702223	0.748492	0.469039	0.150394	0.00110661	0.0023291
YAL032C	PRP45	26.549	0.0201143	0.0768471	0.783128	0.804039	-0.138038	0.0854398	0.0894241	0.119307	0.159585	0.114612	0.154557	0.203949
YAL033W	POP5	26.8088	-0.319655	0.0863413	0.000191388	0.000287679	0.334537	0.0911153	0.000175743	0.000350167	-0.638247	0.124612	1.34268e-07	5.30867e-07
YAL034C	FUN19	19.7147	1.46484	0.108768	1.88971e-42	1.26282e-41	0.414725	0.109322	9.08254e-05	0.000186285	0.988092	0.155526	1.75298e-11	1.15977e-10
YAL035W	FUN12	92.3472	0.646034	0.0812225	1.2002e-15	3.24414e-15	0.935263	0.0838019	3.88871e-30	4.8779e-29	-0.287124	0.114268	0.0100949	0.0175849
YAL036C	RBG1	38.557	0.0810393	0.101747	0.402493	0.437987	0.640216	0.106663	5.77345e-10	1.95619e-09	-0.541922	0.145215	0.000102577	0.000259711
YAL037W	YAL037W	2.83062	0.816915	0.225844	0.000140747	0.000213556	0.364838	0.226667	0.0631788	0.0866667	0.307083	0.292609	0.21108	0.267877
YAL038W	CDC19	1913.86	-0.10618	0.075398	0.137088	0.160183	0.128694	0.0747212	0.0710104	0.0964375	-0.235698	0.103287	0.0200058	0.0328233
YAL039C	CYC3	60.3197	0.0494592	0.0738534	0.477923	0.513956	0.612823	0.0766174	4.27589e-16	2.30334e-15	-0.552015	0.106354	1.14086e-07	4.55485e-07
YAL040C	CLN3	32.5052	-1.0705	0.0948132	4.23496e-30	1.92551e-29	-0.353428	0.0963835	0.000172306	0.000343835	-0.676492	0.13403	1.679e-07	6.52178e-07
YAL041W	CDC24	39.3619	-0.385592	0.0824516	2.52343e-06	4.29145e-06	-0.320088	0.0851997	0.000129194	0.000261343	-0.0564086	0.116827	0.620654	0.674972
YAL042W	ERV46	194.151	0.389454	0.0454247	8.69844e-18	2.55559e-17	0.19147	0.0465331	3.50955e-05	7.53031e-05	0.194459	0.0647566	0.0024848	0.00486867
YAL043C	PTA1	95.0957	-0.192687	0.0684559	0.00436236	0.00588077	-1.04206	0.0705509	7.28674e-51	2.07868e-49	0.836951	0.0974334	1.73242e-18	2.05642e-17
YAL044C	GCV3	508.16	0.737834	0.0534324	1.32046e-43	9.09915e-43	0.10089	0.0545943	0.0527288	0.0733365	0.625474	0.0753202	4.3217e-17	4.62317e-16
YAL045C	YAL045C
YAL046C	BOL3	39.7451	0.336958	0.0701799	1.41233e-06	2.44736e-06	0.504816	0.0722418	1.38134e-12	5.6729e-12	-0.169925	0.0995589	0.082442	0.117496
YAL047C	SPC72	12.4381	0.448145	0.117578	0.000112309	0.000171435	-0.201558	0.123558	0.0833103	0.11174	0.61852	0.16768	9.12994e-05	0.000233125
YAL048C	GEM1
YAL049C	AIM2	147.548	-0.810761	0.0643743	1.17088e-36	6.59523e-36	-0.939556	0.0658475	2.03572e-47	5.20358e-46	0.13107	0.0907917	0.142667	0.190247
YAL051W	OAF1	19.3571	0.328642	0.0936547	0.000398097	0.000583832	-0.118161	0.0978296	0.200421	0.246223	0.433152	0.133145	0.000775442	0.00168282
YAL053W	FLC2	91.3144	-0.017836	0.0599943	0.75226	0.776102	-0.408292	0.0645433	1.6131e-10	5.6758e-10	0.384952	0.0894323	1.23803e-05	3.65553e-05
YAL054C	ACS1	6.37526	3.6131	0.211123	2.61158e-67	3.44703e-66	1.89239	0.205717	4.46552e-22	3.54171e-21	1.51588	0.303508	5.03142e-09	2.4314e-08
YAL055W	PEX22	16.8662	1.23562	0.120006	1.29379e-25	5.08508e-25	0.77268	0.124697	8.96606e-11	3.23192e-10	0.404461	0.166414	0.0103486	0.0179878
YAL056W	GPB2	33.2087	2.02284	0.104374	9.70606e-86	2.06829e-84	0.705795	0.104324	2.94195e-12	1.18347e-11	1.25426	0.149751	1.05065e-18	1.26125e-17
YAL058W	CNE1	25.1383	0.545046	0.0875983	3.67127e-10	7.69647e-10	-0.355509	0.0910442	6.63458e-05	0.000138051	0.881051	0.126793	4.82492e-13	3.83249e-12
YAL059W	ECM1	17.3066	-1.15179	0.14639	8.14237e-16	2.22354e-15	0.39526	0.148797	0.00474193	0.00780175	-1.53042	0.218966	4.22123e-14	3.67178e-13
YAL060W	BDH1	182.44	-0.178614	0.0731321	0.012635	0.0164479	-1.27197	0.0735365	6.36891e-69	3.41348e-67	1.07587	0.103308	1.06667e-26	2.16358e-25
YAL061W	BDH2	49.5424	1.29866	0.138043	7.21064e-22	2.50063e-21	-1.14546	0.140468	7.10816e-18	4.36022e-17	2.46299	0.197466	2.06133e-37	9.34821e-36
YAL062W	GDH3	38.0614	-0.876951	0.147633	1.26219e-09	2.56794e-09	-1.34057	0.155306	7.08035e-20	4.9628e-19	0.418167	0.200186	0.0238055	0.038545
YAL063C	FLO9	7.28854	-4.77572	0.280757	1.90126e-66	2.44856e-65	-2.16316	0.327663	4.45238e-13	1.90981e-12	-2.22923	0.442472	2.73486e-08	1.19335e-07
YAL064W	YAL064W
YAL065C	YAL065C
YAL066W	YAL066W
YAL067C	SEO1	331.851	-1.31306	0.173827	5.61854e-15	1.47511e-14	-0.735192	0.171538	3.27526e-06	7.87784e-06	-0.461143	0.228219	0.0252874	0.0406837
YAL068C	PAU8
YAL069W	YAL069W
YAR002W	NUP60	30.5511	-0.226983	0.0760773	0.00256878	0.00352833	0.128127	0.0809445	0.0958634	0.127099	-0.349165	0.108895	0.00105928	0.00224284
YAR003W	SWD1	6.21801	1.97262	0.189223	1.99692e-27	8.32993e-27	1.30103	0.200122	1.03174e-12	4.30377e-12	0.524194	0.247547	0.0160247	0.0267802
YAR007C	RFA1	86.2185	-0.419875	0.0657534	1.44289e-10	3.07469e-10	-0.509825	0.0671005	1.47114e-14	7.08335e-14	0.0935286	0.0929747	0.306779	0.36936
YAR008W	SEN34	21.6556	-0.445803	0.104522	1.63823e-05	2.65175e-05	-0.708508	0.109694	2.29247e-11	8.62686e-11	0.263946	0.147161	0.0608589	0.0893271
YAR009C	YAR009C
YAR010C	YAR010C
YAR014C	BUD14	35.6712	1.35203	0.0963476	1.17395e-45	8.57988e-45	1.05406	0.101454	8.45354e-27	8.60931e-26	0.26964	0.13517	0.0394032	0.0604433
YAR015W	ADE1	304.773	-0.607837	0.0733134	7.84517e-17	2.213e-16	-0.544339	0.073653	6.37795e-14	2.94017e-13	-0.054612	0.102547	0.587103	0.645497
YAR018C	KIN3	27.5893	-0.305463	0.0895598	0.000579431	0.000837044	-0.0422797	0.0897572	0.618562	0.672973	-0.248451	0.126301	0.0430915	0.0654388
YAR019C	CDC15	11.7074	1.0168	0.121649	2.08983e-17	6.05936e-17	0.314683	0.1247	0.00823598	0.0130799	0.638074	0.171214	7.65452e-05	0.000197735
YAR020C	PAU7
YAR023C	YAR023C	3.05827	1.01037	0.249584	1.58339e-05	2.56455e-05	0.894245	0.26616	5.86543e-05	0.000122672	0.0253334	0.306674	0.918156	0.934178
YAR027W	UIP3	35.838	1.32099	0.0996304	5.34939e-41	3.37903e-40	0.976853	0.10339	1.64043e-22	1.33091e-21	0.311026	0.138758	0.0199858	0.0328094
YAR028W	YAR028W	24.8086	-1.69071	0.116001	1.25987e-49	1.03002e-48	-2.74604	0.125971	3.84311e-107	6.37236e-105	0.976346	0.170127	7.50306e-10	4.11698e-09
YAR029W	YAR029W
YAR030C	YAR030C
YAR031W	PRM9
YAR033W	MST28	17.4757	-0.898012	0.111531	3.5226e-16	9.70957e-16	-1.3436	0.121163	1.64544e-30	2.08869e-29	0.419718	0.157751	0.00528838	0.00971275
YAR035W	YAT1	8.93687	1.16389	0.150591	2.36046e-15	6.28745e-15	-0.0286859	0.149105	0.83543	0.863418	1.117	0.223147	2.37905e-08	1.04497e-07
YAR042W	SWH1	28.5821	0.200049	0.086009	0.0172734	0.0221759	0.0103866	0.0850368	0.897599	0.916601	0.182216	0.120614	0.12089	0.164473
YAR047C	YAR047C
YAR050W	FLO1	9.3692	-2.69327	0.230591	5.17255e-34	2.70933e-33	0.17268	0.206428	0.34281	0.400385	-2.82034	0.331	1.45112e-19	1.86885e-18
YAR053W	YAR053W
YAR060C	YAR060C
YAR061W	YAR061W
YAR062W	YAR062W
YAR064W	YAR064W
YAR066W	YAR066W
YAR068W	YAR068W
YAR069C	YAR069C
YAR070C	YAR070C
YAR071W	PHO11
YAR073W	IMD1
YAR075W	YAR075W
YBL001C	ECM15	219.511	0.540979	0.0472063	1.58808e-30	7.32727e-30	0.203693	0.0477691	1.79757e-05	4.00249e-05	0.331847	0.0668821	5.62555e-07	2.02367e-06
YBL002W	HTB2	558.909	0.33608	0.0642012	1.48241e-07	2.69927e-07	0.23315	0.0640576	0.000233259	0.000457043	0.0979102	0.0899019	0.268953	0.330416
YBL003C	HTA2	628.487	0.0313655	0.0600437	0.577447	0.61132	0.557058	0.0620898	1.22706e-19	8.41183e-19	-0.51761	0.0872234	1.82988e-09	9.43569e-09
YBL004W	UTP20	29.165	-0.269333	0.10534	0.00913714	0.0120123	0.366589	0.108388	0.000485078	0.000912704	-0.615345	0.148895	1.61568e-05	4.68433e-05
YBL005W	PDR3	16.9247	-1.77936	0.15106	1.08181e-33	5.56749e-33	-2.16129	0.155339	8.24823e-46	1.98032e-44	0.322278	0.200965	0.0817668	0.116628
YBL006C	LDB7	88.1579	0.995576	0.0638824	3.27557e-55	3.16579e-54	0.508691	0.064952	2.36209e-15	1.19935e-14	0.470559	0.0903649	1.18806e-07	4.72554e-07
YBL007C	SLA1	142.526	0.906253	0.0454083	5.53582e-89	1.27156e-87	0.476071	0.0466379	9.95616e-25	9.13969e-24	0.422444	0.064816	4.79088e-11	3.03346e-10
YBL008W	HIR1	11.8468	-0.162378	0.115986	0.143091	0.166647	-0.190374	0.119909	0.0921621	0.122682	0.0330625	0.160811	0.829178	0.859468
YBL009W	ALK2	19.6431	-0.161475	0.092825	0.0702931	0.084594	-0.0233437	0.0933957	0.791948	0.827017	-0.132041	0.130417	0.295463	0.358583
YBL010C	LAA2	15.1741	-0.582651	0.111014	1.09403e-07	2.0135e-07	-0.819408	0.119464	8.36977e-13	3.51623e-12	0.240084	0.157067	0.108866	0.150154
YBL011W	SCT1	37.4033	-0.496182	0.0731376	9.20861e-12	2.07919e-11	-0.67521	0.0761262	1.91287e-19	1.2946e-18	0.181992	0.104036	0.0744489	0.107082
YBL012C	YBL012C
YBL013W	FMT1	0.224792	0.500164	0.648047	0.225314	0.254798	0.146335	0.49076	0.550488	0.608467	0.10727	0.580371	0.807869	0.839842
YBL014C	RRN6	20.2806	0.241431	0.0980433	0.011955	0.0156009	0.0495579	0.100842	0.602789	0.658649	0.178353	0.138995	0.183199	0.236394
YBL015W	ACH1	32.7603	0.352044	0.107422	0.000905815	0.0012875	-0.388931	0.107778	0.000199275	0.000393653	0.716392	0.151021	6.31854e-07	2.25316e-06
YBL016W	FUS3	2.63859	0.38716	0.347641	0.204795	0.232885	0.0789516	0.31509	0.740362	0.782854	0.176589	0.404083	0.549523	0.610888
YBL017C	PEP1	96.9949	1.90992	0.0540586	2.56265e-275	5.66559e-273	0.910578	0.0557987	5.14525e-61	2.18406e-59	0.980349	0.0775763	1.03078e-37	4.8833e-36
YBL018C	POP8	48.0498	-0.827805	0.0725216	1.76947e-30	8.14294e-30	-0.43455	0.0756696	5.57637e-09	1.7633e-08	-0.374773	0.103682	0.000228442	0.000546243
YBL019W	APN2	12.4726	0.498188	0.134003	0.000155165	0.000235028	0.00112872	0.133288	0.992773	0.994648	0.453671	0.186555	0.00912033	0.0159711
YBL020W	RFT1	13.5682	-0.77865	0.10634	1.31733e-13	3.23451e-13	-0.504557	0.111881	3.12287e-06	7.52838e-06	-0.240622	0.150332	0.0944878	0.132773
YBL021C	HAP3	22.2408	0.373035	0.100064	0.000166803	0.000252153	0.469238	0.104715	3.98053e-06	9.50953e-06	-0.104169	0.141487	0.444615	0.509091
YBL022C	PIM1	89.7621	0.198659	0.0560734	0.000372635	0.000548157	0.19997	0.0576343	0.000458822	0.00086545	-0.00326983	0.0797866	0.966895	0.974425
YBL023C	MCM2	20.9654	0.420652	0.0910345	3.21375e-06	5.44103e-06	0.490239	0.0958083	1.58039e-07	4.35612e-07	-0.0779622	0.129565	0.534111	0.596003
YBL024W	NCL1	47.5986	-0.653445	0.0883887	9.43121e-14	2.3297e-13	-0.0398601	0.0883407	0.633522	0.686294	-0.586595	0.125434	1.46213e-06	4.96039e-06
YBL025W	RRN10	2.35838	-0.503466	0.222022	0.0166993	0.02147	-0.352116	0.231429	0.0772211	0.104073	-0.0697602	0.290678	0.775072	0.812271
YBL026W	LSM2	106.883	-0.656024	0.0486442	1.24329e-41	8.0844e-41	-0.388044	0.0502167	7.39478e-15	3.62297e-14	-0.261631	0.0695588	0.000152483	0.00037492
YBL027W	RPL19B
YBL028C	YBL028C	31.6185	-1.10278	0.116018	5.25791e-22	1.83664e-21	-0.094571	0.116873	0.388438	0.446889	-0.949754	0.167287	1.60079e-09	8.35182e-09
YBL029W	YBL029W	14.3716	0.237395	0.150246	0.0988762	0.117264	-0.738673	0.152113	2.16084e-07	5.87367e-07	0.936736	0.21352	1.23232e-06	4.22122e-06
YBL030C	PET9	340.336	-1.27536	0.056131	4.37344e-115	1.74477e-113	-0.492292	0.0560601	8.35214e-19	5.39786e-18	-0.767132	0.0791293	1.10878e-22	1.73546e-21
YBL031W	SHE1	22.2446	-0.706101	0.116235	7.50141e-10	1.54273e-09	-0.129876	0.11663	0.235412	0.285581	-0.530471	0.161686	0.000568934	0.00126203
YBL032W	HEK2	93.7278	0.0481087	0.0483469	0.278811	0.310792	-0.270762	0.0502642	5.93571e-08	1.70427e-07	0.320726	0.0693449	3.08134e-06	9.98752e-06
YBL033C	RIB1	51.1895	-0.16459	0.0708193	0.0172263	0.0221261	-0.182746	0.0726186	0.00988582	0.0155604	0.0200978	0.0993099	0.836854	0.865565
YBL034C	STU1	17.218	0.997119	0.100191	8.5842e-24	3.18962e-23	0.623681	0.104065	6.54934e-10	2.20921e-09	0.337178	0.140897	0.0128774	0.0218859
YBL035C	POL12	28.5978	0.33476	0.0861876	9.14694e-05	0.000140514	-0.0696425	0.0879532	0.401268	0.459854	0.393658	0.122219	0.000912415	0.00195607
YBL036C	YBL036C	61.8116	-0.720467	0.0539344	6.37365e-41	4.01646e-40	-0.480637	0.0573146	2.69236e-17	1.58906e-16	-0.231363	0.078158	0.00277648	0.00540029
YBL037W	APL3	31.5378	0.506374	0.0804477	2.40675e-10	5.07964e-10	0.279959	0.0831972	0.000606311	0.00112683	0.21262	0.114154	0.0562773	0.0833865
YBL038W	MRPL16	45.7753	-0.094821	0.0668767	0.132719	0.155488	0.304226	0.0679277	5.87046e-06	1.37483e-05	-0.397226	0.0937163	1.65081e-05	4.77082e-05
YBL039C	URA7	36.4263	-0.861995	0.131918	2.93741e-11	6.46719e-11	-0.07239	0.129803	0.550656	0.608467	-0.724516	0.185139	2.73021e-05	7.60047e-05
YBL040C	ERD2	104.694	-0.281768	0.0494379	1.11518e-08	2.17302e-08	0.0505638	0.0513843	0.289824	0.344799	-0.33167	0.0709657	2.38665e-06	7.84123e-06
YBL041W	PRE7	127.304	-0.544229	0.0458777	1.39678e-32	6.88142e-32	-0.332439	0.0475052	1.95105e-12	7.93278e-12	-0.207077	0.0657468	0.00150857	0.00309291
YBL042C	FUI1	24.2337	0.830272	0.125744	1.97408e-11	4.37531e-11	0.518309	0.131765	3.78039e-05	8.06869e-05	0.263052	0.175625	0.112467	0.15416
YBL043W	ECM13	14.2128	0.198474	0.140255	0.138812	0.16209	-0.261721	0.139829	0.0459169	0.0648655	0.437435	0.190827	0.0140918	0.0237821
YBL044W	YBL044W
YBL045C	COR1	207.418	0.196665	0.060483	0.00106229	0.00150428	0.539371	0.0606494	2.65125e-19	1.77396e-18	-0.340761	0.0848657	4.78166e-05	0.00012788
YBL046W	PSY4	25.1204	0.821439	0.0993129	6.66229e-17	1.88534e-16	0.518093	0.101869	1.70359e-07	4.68111e-07	0.273719	0.139069	0.0411469	0.0627353
YBL047C	EDE1	156.42	0.109867	0.0478587	0.0177794	0.0227814	-0.331157	0.0478239	3.29372e-12	1.316e-11	0.439096	0.0667254	3.06549e-11	1.98844e-10
YBL048W	RRT1
YBL049W	MOH1	5.76488	2.27597	0.257135	3.90634e-21	1.31684e-20	1.50477	0.265287	1.36933e-10	4.85998e-10	0.530542	0.312593	0.0388999	0.0597687
YBL050W	SEC17	98.3709	0.748629	0.0589516	3.43961e-37	1.95822e-36	0.263554	0.0602472	1.01249e-05	2.31065e-05	0.473277	0.0838237	1.00894e-08	4.6592e-08
YBL051C	PIN4	29.1707	1.56124	0.0967316	7.09172e-60	7.80678e-59	1.74586	0.103249	5.1289e-66	2.54336e-64	-0.172426	0.136413	0.191305	0.2456
YBL052C	SAS3	30.4092	1.22592	0.0844686	1.84299e-48	1.46391e-47	0.641511	0.0883047	1.11923e-13	5.06709e-13	0.549572	0.12039	2.67486e-06	8.71794e-06
YBL053W	YBL053W
YBL054W	TOD6	25.9084	-1.04434	0.132632	1.04898e-15	2.8441e-15	-0.328524	0.136959	0.0112596	0.0175665	-0.637803	0.186832	0.000251205	0.000594246
YBL055C	YBL055C	17.3978	0.172536	0.107203	0.093448	0.111024	0.523238	0.112268	1.43095e-06	3.57974e-06	-0.343206	0.150567	0.0172148	0.0286518
YBL056W	PTC3	63.7813	0.608953	0.0680119	2.40111e-19	7.51639e-19	0.48254	0.0702546	3.43166e-12	1.36802e-11	0.116875	0.0967036	0.218794	0.276542
YBL057C	PTH2	61.6633	0.128871	0.05082	0.0095736	0.0125705	0.375151	0.054094	2.80394e-12	1.13052e-11	-0.245203	0.0733436	0.000736496	0.00160751
YBL058W	SHP1	119.337	0.0978709	0.054254	0.0574417	0.0698219	-0.325649	0.0541867	1.4094e-09	4.65935e-09	0.422167	0.0753072	1.44286e-08	6.54341e-08
YBL059W	IAI11	30.2358	-0.519977	0.0806978	8.98388e-11	1.92912e-10	-0.197116	0.0842359	0.0157593	0.0240977	-0.306432	0.114686	0.00618937	0.0111973
YBL060W	YEL1	17.8016	0.563212	0.113946	5.61211e-07	9.89298e-07	0.326594	0.119136	0.00430777	0.00712279	0.206621	0.160246	0.17627	0.228677
YBL061C	SKT5	34.1895	0.268521	0.078515	0.000570972	0.000825273	0.180082	0.0834535	0.0253741	0.0373157	0.0805183	0.112374	0.463215	0.527685
YBL062W	YBL062W
YBL063W	KIP1	10.0031	0.0391281	0.129408	0.752118	0.776102	-0.235253	0.135918	0.0649117	0.0886998	0.266162	0.18302	0.121406	0.165132
YBL064C	PRX1	88.7545	1.81571	0.0875014	2.25143e-97	6.38829e-96	0.467674	0.0864095	3.39531e-08	9.96984e-08	1.31075	0.124893	1.69515e-27	3.65629e-26
YBL065W	YBL065W
YBL066C	SEF1	8.26775	-0.195969	0.169201	0.222899	0.252201	0.039563	0.163915	0.792283	0.827204	-0.212275	0.225984	0.300254	0.362903
YBL067C	UBP13	17.6846	-0.402758	0.104537	9.88638e-05	0.000151479	-0.074698	0.107415	0.460086	0.518966	-0.303083	0.147889	0.0325709	0.0507758
YBL068W	PRS4	34.2788	-0.372235	0.0982427	0.000130997	0.000199217	0.485228	0.104158	1.63265e-06	4.05375e-06	-0.836195	0.143194	1.07525e-09	5.72822e-09
YBL069W	AST1	22.3296	-0.48572	0.099763	8.90318e-07	1.55344e-06	-0.274814	0.105113	0.0068095	0.0109422	-0.189979	0.141654	0.164312	0.215004
YBL070C	YBL070C
YBL071C	YBL071C
YBL072C	RPS8A	658.973	-1.8039	0.0839069	3.11642e-104	1.03348e-102	-0.354629	0.0827152	1.28356e-05	2.90479e-05	-1.42002	0.11968	6.4747e-34	2.29032e-32
YBL073W	YBL073W
YBL074C	AAR2	0.638837	0.997975	0.435082	0.00551018	0.0073682	0.592635	0.413169	0.0329281	0.0475032	0.115058	0.443412	1	1
YBL075C	SSA3	20.8908	2.01588	0.131716	6.31422e-55	6.04752e-54	0.600987	0.132171	1.84245e-06	4.55547e-06	1.31936	0.191871	9.70677e-14	8.17526e-13
YBL076C	ILS1	294.687	0.257878	0.0732126	0.000393657	0.000577799	0.615499	0.0735125	1.89522e-17	1.12484e-16	-0.354862	0.102447	0.000417941	0.000955449
YBL077W	YBL077W
YBL078C	ATG8	29.3795	0.556347	0.158188	0.000313441	0.000464299	0.252918	0.154715	0.0773563	0.104202	0.250414	0.210682	0.195235	0.250222
YBL079W	NUP170	49.2482	0.0213767	0.057242	0.690676	0.718934	-0.224629	0.0635192	0.000348806	0.000671296	0.246097	0.0866335	0.0039489	0.00741695
YBL080C	PET112	12.3618	0.49656	0.115305	1.29506e-05	2.1072e-05	0.228773	0.118945	0.0426885	0.0605467	0.238352	0.160706	0.118865	0.162009
YBL081W	YBL081W	19.3166	-0.0818949	0.101493	0.396307	0.432142	0.13691	0.108297	0.179558	0.223489	-0.218118	0.145533	0.118563	0.161638
YBL082C	ALG3	21.6784	0.0123916	0.0885674	0.883563	0.896981	0.0619021	0.0956524	0.492945	0.551807	-0.0510816	0.131413	0.688793	0.736693
YBL083C	YBL083C
YBL084C	CDC27	15.8381	0.327102	0.113215	0.00332063	0.00451776	-0.166271	0.117552	0.132817	0.170265	0.471839	0.159379	0.00187287	0.00376703
YBL085W	BOI1	36.6033	0.328246	0.0723169	5.089e-06	8.51e-06	0.0235929	0.0727727	0.732133	0.775543	0.293708	0.10336	0.0037579	0.00708832
YBL086C	YBL086C	20.9828	0.883906	0.114355	4.78881e-15	1.26352e-14	0.409371	0.117415	0.000299787	0.000580749	0.427029	0.159982	0.00498484	0.00919665
YBL087C	RPL23A
YBL088C	TEL1	15.7434	1.37109	0.11789	3.20221e-32	1.56167e-31	0.871114	0.122057	8.5477e-14	3.89975e-13	0.441508	0.162986	0.00423164	0.00788935
YBL089W	AVT5	23.9939	0.553432	0.10126	3.41324e-08	6.48198e-08	-0.0983	0.102622	0.308962	0.365437	0.627047	0.143041	4.76148e-06	1.48702e-05
YBL090W	MRP21	30.4956	-0.784449	0.0866501	7.48155e-20	2.38564e-19	-0.397526	0.0880903	4.14682e-06	9.88013e-06	-0.363008	0.121746	0.00215327	0.00427273
YBL091C	MAP2	118.539	1.08456	0.0413276	2.43261e-152	1.89816e-150	0.843904	0.0437927	1.02289e-83	8.2234e-82	0.235118	0.0598671	7.6212e-05	0.000197067
YBL092W	RPL32	1685.91	-1.72391	0.0987039	7.10501e-70	1.02166e-68	-0.172785	0.0976042	0.0632411	0.0867073	-1.51884	0.140904	1.37721e-28	3.26228e-27
YBL093C	ROX3	49.2476	0.134089	0.0739923	0.0588302	0.0714145	-0.259683	0.0764589	0.000558067	0.00104228	0.389261	0.104372	0.000138219	0.000343026
YBL094C	YBL094C
YBL095W	MRX3	60.569	-0.746105	0.0896952	5.11444e-17	1.45742e-16	-0.744007	0.0905499	3.87196e-17	2.24531e-16	0.00918974	0.124513	0.939459	0.951474
YBL096C	YBL096C
YBL097W	BRN1	3.97748	0.238086	0.166855	0.134275	0.157173	2.65092	0.2096	1.7831e-38	3.19633e-37	-2.32835	0.271934	8.01473e-20	1.04487e-18
YBL098W	BNA4	42.1433	-0.957052	0.105858	5.91624e-20	1.89792e-19	-0.382287	0.105811	0.000199086	0.00039353	-0.531352	0.147112	0.000169994	0.000416815
YBL099W	ATP1	323.11	0.172686	0.0566727	0.00210924	0.00291449	0.36903	0.0564493	4.37675e-11	1.61159e-10	-0.195972	0.0792653	0.0124246	0.021174
YBL100C	YBL100C
YBL101C	ECM21	39.0168	0.398728	0.0936148	1.75161e-05	2.83182e-05	-0.294131	0.0944139	0.0014043	0.00249121	0.672941	0.131975	1.21573e-07	4.8276e-07
YBL102W	SFT2	99.1229	1.04509	0.0604259	1.59144e-67	2.11634e-66	0.535893	0.0612418	9.60129e-19	6.15271e-18	0.494049	0.0854101	4.35577e-09	2.12815e-08
YBL103C	RTG3	17.121	-0.341395	0.11783	0.00320974	0.0043727	-0.392526	0.120746	0.000726073	0.00133168	0.0622495	0.163395	0.688741	0.736693
YBL104C	SEA4	41.6135	-0.381674	0.0714187	7.89635e-08	1.46548e-07	-0.829791	0.0750109	2.2175e-29	2.64406e-28	0.443579	0.102164	9.3835e-06	2.81611e-05
YBL105C	PKC1	29.2672	0.417271	0.0831023	4.33703e-07	7.70673e-07	-0.227167	0.0857955	0.006573	0.0105782	0.628388	0.118347	4.58053e-08	1.92433e-07
YBL106C	SRO77	14.3856	1.23936	0.121579	3.68545e-25	1.41909e-24	-0.00227188	0.119434	0.983873	0.988718	1.19252	0.178347	5.59509e-13	4.39165e-12
YBL107C	MIX23	33.3727	-0.470412	0.0720102	5.22728e-11	1.13254e-10	0.0552768	0.074573	0.431619	0.490715	-0.515563	0.103652	3.76558e-07	1.38944e-06
YBL108W	YBL108W
YBL109W	YBL109W
YBL111C	YBL111C
YBL112C	YBL112C
YBL113C	YBL113C
YBR001C	NTH2	46.4539	2.95579	0.123651	1.34197e-128	6.65468e-127	0.61346	0.120063	1.05511e-07	2.9481e-07	2.27104	0.174088	2.07384e-40	1.12284e-38
YBR002C	RER2	22.6176	-0.597328	0.0845945	1.1657e-12	2.74288e-12	-0.00296941	0.087392	0.971442	0.979193	-0.571711	0.122806	1.57513e-06	5.31319e-06
YBR003W	COQ1	52.064	0.722254	0.068639	4.06543e-26	1.62556e-25	0.28459	0.0694288	3.33397e-05	7.17972e-05	0.422817	0.0968339	8.4706e-06	2.55514e-05
YBR004C	GPI18	19.845	0.678688	0.106801	1.31708e-10	2.81111e-10	0.621102	0.112448	1.06081e-08	3.26869e-08	0.0362289	0.150406	0.801211	0.835047
YBR005W	RCR1	24.8523	-0.105509	0.105446	0.292922	0.325428	-0.204452	0.109296	0.0493647	0.0691534	0.097876	0.14766	0.489491	0.552016
YBR006W	UGA2	68.1289	0.836259	0.0841522	1.40507e-23	5.1773e-23	0.468206	0.0841018	1.41315e-08	4.30188e-08	0.345839	0.117209	0.00244613	0.00479821
YBR007C	DSF2	20.5949	0.94966	0.106313	1.61025e-19	5.07363e-19	0.784103	0.11087	2.24783e-13	9.89789e-13	0.137749	0.148367	0.333562	0.396559
YBR008C	FLR1	34.2352	-0.200263	0.111611	0.0626741	0.0758378	0.0215139	0.108671	0.833955	0.862063	-0.21202	0.153254	0.148279	0.196348
YBR009C	HHF1	594.777	0.169351	0.0584441	0.00338297	0.00460139	0.0862709	0.0590779	0.121273	0.156754	0.0782736	0.0814839	0.330897	0.394105
YBR010W	HHT1	593.478	-0.495061	0.066382	6.95972e-14	1.73236e-13	-0.121804	0.0672677	0.0581936	0.0803475	-0.361287	0.0929229	7.90759e-05	0.000203975
YBR011C	IPP1	1388.11	-0.418497	0.0382291	5.82412e-28	2.46827e-27	-0.309029	0.0382454	5.06703e-16	2.71847e-15	-0.107324	0.0539077	0.0453927	0.0685208
YBR012C	YBR012C
YBR013C	YBR013C
YBR014C	GRX7	55.9093	-0.413689	0.0563573	1.80982e-13	4.41716e-13	-0.124937	0.0604459	0.0319537	0.0461853	-0.280836	0.0813833	0.000482924	0.00108622
YBR015C	MNN2	64.7237	0.538884	0.0588261	3.90744e-20	1.26189e-19	0.116432	0.0622629	0.0507065	0.0707894	0.411392	0.084306	7.64514e-07	2.70254e-06
YBR016W	YBR016W	165.563	0.0943634	0.0551054	0.0702544	0.0845666	0.0989424	0.0555454	0.0612691	0.0843524	-0.00489126	0.0758916	0.948082	0.958012
YBR017C	KAP104	40.0282	-0.312057	0.0746434	2.63729e-05	4.21109e-05	-0.414241	0.0782914	7.63356e-08	2.1625e-07	0.105932	0.106812	0.312173	0.375089
YBR018C	GAL7	2.82206	0.543086	0.245639	0.0183399	0.0234655	-0.460765	0.248422	0.0283695	0.0414109	0.895757	0.35626	0.00128157	0.00266651
YBR019C	GAL10	15.5611	-4.13188	0.186138	1.35698e-110	5.1065e-109	-4.77581	0.217402	1.00757e-109	1.78206e-107	0.51626	0.259207	0.0202751	0.0332241
YBR020W	GAL1	5.59018	-0.0881576	0.18504	0.615369	0.647718	-1.55489	0.211944	2.19556e-15	1.11587e-14	1.35895	0.292585	5.29985e-08	2.2073e-07
YBR021W	FUR4	10.2717	-0.395615	0.169414	0.0155703	0.0200817	-0.44753	0.175008	0.00542051	0.00882787	0.0768881	0.228131	0.710215	0.7561
YBR022W	POA1	40.3284	0.51437	0.0787384	5.00294e-11	1.08527e-10	0.287011	0.0804083	0.000282667	0.000550195	0.214332	0.111098	0.0480436	0.072213
YBR023C	CHS3	53.7371	0.142226	0.0684394	0.0316454	0.0396109	-0.0616808	0.0693742	0.344315	0.402054	0.204651	0.0959881	0.0299921	0.04718
YBR024W	SCO2	18.8682	0.347005	0.107478	0.00107588	0.0015227	0.0706454	0.107674	0.485923	0.544866	0.254379	0.149843	0.0761486	0.109231
YBR025C	OLA1	147.73	-1.37944	0.0898658	3.83853e-54	3.59211e-53	-0.286963	0.0895315	0.00104904	0.00189135	-1.05462	0.128121	1.47173e-17	1.6235e-16
YBR026C	ETR1	77.5412	1.63543	0.0746696	9.67576e-108	3.49249e-106	0.555623	0.0746921	4.26257e-14	1.99095e-13	1.04838	0.106112	2.94827e-24	5.1459e-23
YBR027C	YBR027C
YBR028C	YPK3	17.5099	0.979606	0.107789	3.63967e-20	1.17901e-19	0.764797	0.111757	1.26388e-12	5.21069e-12	0.183313	0.149985	0.201991	0.257574
YBR029C	CDS1	73.2002	-0.503949	0.0680251	1.0028e-13	2.47596e-13	0.133686	0.0705571	0.0481609	0.0677368	-0.627007	0.0967448	4.26826e-11	2.71877e-10
YBR030W	RKM3	33.3963	0.594858	0.0759409	3.37271e-15	8.92994e-15	0.643222	0.0809604	5.80907e-16	3.10402e-15	-0.0564303	0.109225	0.597475	0.654636
YBR031W	RPL4A
YBR032W	YBR032W
YBR033W	EDS1	5.69652	0.639591	0.197959	0.000781754	0.00111625	0.554233	0.201071	0.00211072	0.00366356	0.0254086	0.25791	0.910637	0.927882
YBR034C	HMT1	70.7399	-1.1913	0.0832364	3.77843e-47	2.914e-46	-0.271246	0.0851093	0.00114308	0.00204836	-0.88679	0.119222	1.84573e-14	1.66839e-13
YBR035C	PDX3	220.66	-0.145699	0.0525861	0.00494196	0.00663682	-0.215844	0.0525636	3.54539e-05	7.60074e-05	0.0704554	0.073598	0.333821	0.396698
YBR036C	CSG2	61.5046	-0.297736	0.0630946	2.17701e-06	3.7214e-06	-0.157865	0.0653447	0.0131451	0.0203249	-0.134094	0.0895974	0.12829	0.173252
YBR037C	SCO1	37.8229	0.263945	0.0780391	0.000655833	0.000943048	0.402408	0.0790524	2.30278e-07	6.24671e-07	-0.140529	0.10954	0.189312	0.243101
YBR038W	CHS2	44.0631	-0.283145	0.0714817	6.86246e-05	0.000106437	0.331328	0.0733393	4.65649e-06	1.10301e-05	-0.604173	0.101825	1.39551e-09	7.33853e-09
YBR039W	ATP3	143.8	-0.794303	0.0644812	3.8389e-35	2.08061e-34	-0.149806	0.0654925	0.0184595	0.0279128	-0.628698	0.0909274	2.2706e-12	1.65429e-11
YBR040W	FIG1	1.37641	-1.85899	0.447086	5.39288e-07	9.516e-07	-1.91221	0.499161	8.38365e-07	2.15313e-06	0.0358658	0.423381	0.675254	0.72543
YBR041W	FAT1	42.6598	-0.0668843	0.0693231	0.303928	0.336809	-0.364559	0.0718341	2.71515e-07	7.30556e-07	0.291118	0.0988979	0.00270226	0.00526752
YBR042C	CST26	19.4427	0.228481	0.106691	0.0276278	0.0347872	0.43377	0.10898	4.02855e-05	8.57076e-05	-0.205137	0.148068	0.148919	0.197048
YBR043C	QDR3	110.005	-0.0448298	0.0734793	0.518269	0.553611	-0.521819	0.0762881	3.70786e-12	1.47591e-11	0.467304	0.106001	6.54462e-06	2.00495e-05
YBR044C	TCM62	25.2608	0.576298	0.0870786	2.62939e-11	5.80107e-11	0.13729	0.0903025	0.109075	0.14255	0.415633	0.123097	0.000505499	0.00112981
YBR045C	GIP1	12.4167	0.29752	0.157684	0.0496797	0.0607935	-0.711625	0.162894	2.54265e-06	6.18582e-06	0.965885	0.227848	2.046e-06	6.7978e-06
YBR046C	ZTA1	24.3995	1.28804	0.11094	5.44483e-32	2.62878e-31	1.18896	0.114514	4.95242e-27	5.15246e-26	0.0825748	0.152144	0.570454	0.630327
YBR047W	FMP23	21.4443	0.926726	0.120457	5.79883e-15	1.52094e-14	0.834897	0.123819	1.71334e-12	6.99844e-12	0.0649484	0.165104	0.678853	0.728707
YBR048W	RPS11B
YBR049C	REB1	17.7004	-0.0728395	0.106161	0.471535	0.507395	0.258684	0.111061	0.0151992	0.0233083	-0.325076	0.150896	0.0243479	0.0393152
YBR050C	REG2	3.9382	2.79511	0.273699	6.08241e-27	2.49407e-26	-0.000693648	0.235508	0.997248	0.997812	2.65063	0.397528	1.70124e-13	1.40824e-12
YBR051W	YBR051W
YBR052C	RFS1	161.537	2.15091	0.0772982	1.20659e-172	1.25532e-170	0.429552	0.0761664	1.03219e-08	3.18417e-08	1.69743	0.109443	9.3436e-56	9.91543e-54
YBR053C	YBR053C	109.889	1.38287	0.0748273	3.16262e-77	5.68842e-76	-0.10665	0.0756517	0.136269	0.174311	1.48189	0.107172	2.60184e-45	1.89115e-43
YBR054W	YRO2	1.92642	0.444424	0.365853	0.161383	0.186557	-0.692527	0.386705	0.0115664	0.018008	0.959201	0.540368	0.00507518	0.00935031
YBR055C	PRP6	20.2722	0.854468	0.0985107	1.97404e-18	5.96823e-18	0.409435	0.102406	3.9808e-05	8.47597e-05	0.409853	0.13949	0.00227141	0.00449043
YBR056W	YBR056W	51.6756	1.76579	0.115711	3.20776e-54	3.01246e-53	0.534109	0.113983	1.21997e-06	3.07367e-06	1.16002	0.16534	7.40019e-14	6.28247e-13
YBR057C	MUM2	25.9275	-0.137128	0.0879298	0.102564	0.121501	-0.261513	0.0900258	0.00291036	0.00493839	0.122702	0.122714	0.304039	0.366477
YBR058C	UBP14	50.5331	0.474959	0.0666408	8.25783e-13	1.9552e-12	-0.119917	0.0703654	0.0737439	0.0999452	0.585463	0.0955529	4.487e-10	2.53277e-09
YBR059C	AKL1	76.5488	0.879724	0.0577529	9.78193e-53	8.82703e-52	0.30288	0.0589752	2.21057e-07	5.99964e-07	0.563733	0.0821666	3.46834e-12	2.46359e-11
YBR060C	ORC2	28.1479	-0.155755	0.0815524	0.0476303	0.0583934	-0.616279	0.0848742	1.27832e-13	5.73353e-13	0.452978	0.115146	5.53887e-05	0.00014658
YBR061C	TRM7	31.1894	-0.332338	0.0906893	0.000219873	0.000328818	0.105182	0.0948453	0.239559	0.290139	-0.424907	0.129289	0.000713632	0.00155953
YBR062C	YBR062C	32.3141	0.885492	0.0901215	3.89758e-23	1.41164e-22	0.953613	0.0950531	5.99997e-25	5.55599e-24	-0.0761032	0.127259	0.53793	0.599508
YBR063C	YBR063C	16.6365	0.807927	0.106817	2.01192e-14	5.15464e-14	0.2116	0.112499	0.0479043	0.0674219	0.551921	0.15211	0.000139056	0.000344943
YBR064W	YBR064W
YBR065C	ECM2	3.14884	-0.545447	0.233865	0.0134182	0.0174332	-1.16505	0.275233	5.00636e-07	1.31504e-06	0.522588	0.313822	0.0469053	0.0706643
YBR066C	NRG2	31.0036	0.240285	0.129761	0.0548682	0.0669112	1.23604	0.134164	4.61957e-22	3.65842e-21	-0.942185	0.183814	3.53627e-08	1.51318e-07
YBR067C	TIP1	20.6569	0.883776	0.145981	6.17894e-10	1.27719e-09	-0.148138	0.144738	0.269197	0.323086	0.972423	0.210293	3.42452e-07	1.27423e-06
YBR068C	BAP2	71.963	0.865411	0.140762	3.56773e-10	7.48532e-10	-0.323942	0.139105	0.0136564	0.0210641	1.14834	0.204803	7.47979e-10	4.10847e-09
YBR069C	TAT1	16.6865	0.10985	0.16139	0.474487	0.510365	-0.0472921	0.159442	0.746974	0.787491	0.145654	0.219309	0.466149	0.529519
YBR070C	ALG14	32.7928	-0.0263414	0.0830502	0.73911	0.763426	-0.222336	0.0890478	0.0101125	0.0158702	0.191867	0.121519	0.104255	0.144357
YBR071W	YBR071W	25.538	-0.775545	0.103472	3.59848e-14	9.13565e-14	-0.221816	0.105257	0.0278118	0.0406416	-0.516115	0.144716	0.000202322	0.000489968
YBR072W	HSP26	20.886	1.07403	0.143581	2.08424e-14	5.33477e-14	0.175502	0.141742	0.182543	0.226673	0.811837	0.201269	1.11889e-05	3.33342e-05
YBR073W	RDH54	23.1489	-0.400031	0.10772	0.000172836	0.000260975	-1.1264	0.114504	1.67292e-24	1.51476e-23	0.696799	0.153302	1.79233e-06	6.01523e-06
YBR074W	PFF1	21.4419	0.777062	0.086658	1.66049e-19	5.22883e-19	0.406373	0.0926663	7.33272e-06	1.70124e-05	0.344774	0.124927	0.00440682	0.00819292
YBR076W	ECM8	1.67025	0.159435	0.334848	0.590809	0.623848	-0.743995	0.363212	0.00540689	0.0088111	0.745595	0.462348	0.0169139	0.0281686
YBR077C	SLM4	46.9478	1.13055	0.0860894	5.30602e-40	3.25853e-39	1.0664	0.089118	1.51326e-34	2.2941e-33	0.0532045	0.120497	0.650163	0.702383
YBR078W	ECM33	338.434	0.501795	0.0567685	7.57602e-19	2.3236e-18	0.523235	0.0570846	2.3155e-20	1.66017e-19	-0.0252245	0.0798751	0.749307	0.789794
YBR079C	RPG1	79.5036	0.577469	0.0767271	3.77707e-14	9.56619e-14	0.987816	0.0797874	1.47182e-36	2.4253e-35	-0.404283	0.108683	0.000146064	0.000360305
YBR080C	SEC18	64.8753	0.747044	0.0624208	3.01381e-33	1.5172e-32	0.283238	0.0644848	9.06233e-06	2.08249e-05	0.450512	0.0891633	2.79466e-07	1.05391e-06
YBR081C	SPT7	24.9202	1.1001	0.0867015	1.8412e-37	1.05844e-36	0.207383	0.0901466	0.0173316	0.0263576	0.857418	0.124706	1.01318e-12	7.73513e-12
YBR082C	UBC4	383.115	-0.216823	0.0425592	3.34162e-07	5.97193e-07	0.334029	0.0431776	7.68527e-15	3.76181e-14	-0.547583	0.0604783	8.88922e-20	1.15321e-18
YBR083W	TEC1	18.6418	-0.264573	0.118085	0.0213804	0.0271853	0.230516	0.123419	0.0483428	0.0679309	-0.473958	0.165988	0.00260614	0.00509062
YBR084W	MIS1	51.3353	-0.753044	0.0945958	9.68032e-16	2.63404e-15	-0.0268046	0.0939139	0.763171	0.8017	-0.693737	0.134466	9.13799e-08	3.70973e-07
YBR085W	AAC3	4.56979	-0.504507	0.198158	0.00791421	0.0104668	-0.47665	0.210261	0.0105441	0.0165181	0.025572	0.264362	0.911866	0.928846
YBR086C	IST2	87.2306	0.848004	0.0556466	9.41379e-53	8.5093e-52	0.0249629	0.0544589	0.625334	0.679366	0.809188	0.0792576	4.13812e-25	7.59753e-24
YBR087W	RFC5	34.7172	-0.26081	0.0697093	0.000169428	0.000256048	0.0710554	0.072837	0.299869	0.355797	-0.327654	0.0999588	0.000831501	0.00179932
YBR088C	POL30	121.054	-0.592724	0.0638456	1.16596e-20	3.86661e-20	-0.107056	0.0659394	0.0873687	0.1168	-0.471694	0.0903465	1.16618e-07	4.64976e-07
YBR089W	YBR089W
YBR090C	YBR090C
YBR091C	TIM12	40.056	-1.2714	0.0698179	6.82962e-75	1.13956e-73	-0.555685	0.0734765	1.65703e-14	7.97119e-14	-0.6892	0.100703	3.0936e-12	2.20924e-11
YBR092C	PHO3	34.5462	-0.648855	0.118765	3.05845e-08	5.82698e-08	0.160834	0.120711	0.155887	0.196984	-0.77213	0.168473	1.21673e-06	4.17861e-06
YBR093C	PHO5	26.4087	2.99418	0.143947	2.24911e-98	6.55703e-97	-0.589204	0.142627	1.26332e-05	2.86094e-05	3.60623	0.205493	6.68163e-69	1.36357e-66
YBR094W	PBY1	26.6937	0.94681	0.0798399	7.61054e-33	3.78813e-32	0.46126	0.0840789	2.28574e-08	6.83274e-08	0.459311	0.114532	3.8752e-05	0.000105068
YBR095C	RXT2	24.2321	-0.249581	0.095077	0.00756922	0.010023	-0.364822	0.0978724	0.000132735	0.000268199	0.11872	0.133408	0.357388	0.421213
YBR096W	YBR096W	104.36	0.554335	0.0589461	3.90898e-21	1.31689e-20	0.651645	0.0605585	1.54261e-27	1.66026e-26	-0.100654	0.0837134	0.223067	0.281138
YBR097W	VPS15	19.0075	0.457786	0.107856	1.777e-05	2.87113e-05	-0.319576	0.109777	0.00259943	0.00445066	0.749676	0.153112	2.5461e-07	9.6566e-07
YBR098W	MMS4	14.2484	-0.295285	0.120623	0.0122307	0.0159345	-0.453522	0.124965	0.000155513	0.000312086	0.163446	0.167669	0.304267	0.366668
YBR099C	YBR099C
YBR101C	FES1	46.2567	-0.0778396	0.0902106	0.362841	0.398022	0.600647	0.0944735	7.18831e-11	2.60884e-10	-0.668399	0.129696	1.02167e-07	4.10994e-07
YBR102C	EXO84	29.717	0.281366	0.078748	0.000321727	0.000475644	-0.252974	0.0822569	0.00170338	0.00299374	0.522554	0.112748	1.94782e-06	6.51236e-06
YBR103W	SIF2	40.3979	0.0842682	0.0679664	0.187054	0.214273	-0.0312788	0.0683662	0.628144	0.681582	0.119166	0.0963426	0.208095	0.26453
YBR104W	YMC2	72.2246	-0.10212	0.0917942	0.240979	0.271184	0.409653	0.0929363	6.55886e-06	1.52504e-05	-0.503928	0.128618	5.33853e-05	0.00014156
YBR105C	VID24	68.2882	1.06899	0.0832289	2.71578e-38	1.58874e-37	-0.229828	0.0848668	0.00549747	0.00894499	1.28452	0.120781	3.5217e-28	7.98554e-27
YBR106W	SND3	253.797	-0.99803	0.0632266	1.38612e-56	1.39295e-55	-0.378047	0.0635673	1.86685e-09	6.10696e-09	-0.603149	0.0891782	6.79015e-12	4.66691e-11
YBR107C	IML3	13.1688	-0.626142	0.14742	1.44306e-05	2.34156e-05	-1.28283	0.158992	9.33739e-18	5.6622e-17	0.598659	0.20503	0.00145474	0.00299412
YBR108W	AIM3	47.7561	0.145722	0.0835361	0.069048	0.0832278	-0.105391	0.0837721	0.182872	0.226922	0.249973	0.115245	0.0260418	0.041728
YBR109C	CMD1	525.62	-0.42738	0.0260549	1.53379e-60	1.71694e-59	-0.312307	0.0266297	7.17466e-32	9.6867e-31	-0.113992	0.0372014	0.00213233	0.00423434
YBR110W	ALG1	35.626	0.171578	0.0807421	0.0286237	0.0359643	-0.233904	0.0820289	0.00355558	0.00594388	0.398311	0.112815	0.00029484	0.000690388
YBR111C	YSA1	126.183	0.727862	0.04948	3.29481e-49	2.65688e-48	0.0536585	0.0508771	0.256454	0.308979	0.662297	0.070631	2.45446e-21	3.5009e-20
YBR112C	CYC8	54.6385	0.14212	0.0642418	0.0226858	0.0287624	0.0151533	0.062849	0.798768	0.832828	0.123793	0.0902283	0.16339	0.214273
YBR113W	YBR113W
YBR114W	RAD16	32.8747	1.12406	0.0937908	1.0697e-33	5.51586e-33	0.42616	0.0952398	4.61956e-06	1.09524e-05	0.657039	0.132313	2.65007e-07	1.00295e-06
YBR115C	LYS2	372.625	-0.87222	0.10545	6.03127e-17	1.71225e-16	0.611676	0.104618	1.673e-09	5.49996e-09	-1.47921	0.152123	6.05431e-24	1.02633e-22
YBR116C	YBR116C
YBR117C	TKL2	5.60636	1.11914	0.237143	5.52114e-07	9.73909e-07	-2.60952	0.26172	2.96012e-25	2.77498e-24	3.76295	0.357223	2.36445e-27	5.03847e-26
YBR118W	TEF2	1866.94	-0.8539	0.0594778	4.63054e-47	3.55567e-46	-0.0260223	0.0570961	0.627885	0.68144	-0.812749	0.0838407	9.75495e-23	1.5359e-21
YBR119W	MUD1	24.2616	-0.309339	0.0865124	0.000313625	0.000464442	-0.246228	0.0908628	0.00536564	0.00874926	-0.054149	0.123164	0.651371	0.70345
YBR120C	CBP6	35.9824	-0.225413	0.0763423	0.00283509	0.00387806	0.30659	0.076836	5.10644e-05	0.000107349	-0.522141	0.107213	6.45069e-07	2.29714e-06
YBR121C	GRS1	166.219	-0.0253917	0.0741383	0.718142	0.744231	0.331833	0.0773936	1.3409e-05	3.02922e-05	-0.353926	0.107947	0.00081341	0.0017609
YBR122C	MRPL36	107.68	0.000164628	0.0459223	0.996932	0.99712	0.13513	0.0510765	0.00697913	0.0111911	-0.134617	0.0701855	0.0528668	0.0786848
YBR123C	TFC1	25.4733	0.0884436	0.0862598	0.278766	0.310792	-0.260496	0.0895951	0.00289068	0.00490657	0.345418	0.122396	0.00362631	0.00687431
YBR124W	YBR124W
YBR125C	PTC4	34.8065	-1.36721	0.0802375	4.74994e-66	6.08772e-65	-1.06574	0.0845752	5.90087e-38	1.04716e-36	-0.281201	0.113767	0.011328	0.0195087
YBR126C	TPS1	210.308	1.87775	0.0823511	6.4248e-117	2.64263e-115	0.0277958	0.0784011	0.708242	0.753999	1.83467	0.116457	3.18719e-57	3.59814e-55
YBR127C	VMA2	180.083	0.631871	0.0453745	3.00976e-44	2.1152e-43	0.0943999	0.0470359	0.0360417	0.0516857	0.529776	0.064396	1.1299e-16	1.16413e-15
YBR128C	ATG14	12.4733	0.909966	0.157883	3.39216e-09	6.7741e-09	-0.300275	0.157238	0.0394605	0.0562994	1.15831	0.232664	2.12847e-08	9.39572e-08
YBR129C	OPY1	17.5426	-0.392884	0.107223	0.000210839	0.000315575	-0.402841	0.111415	0.000187566	0.000372047	0.0227267	0.150664	0.87497	0.897987
YBR130C	SHE3	37.6612	0.794067	0.0705992	1.26592e-29	5.67312e-29	0.614901	0.0743861	4.65754e-17	2.68036e-16	0.165799	0.101182	0.0950389	0.133392
YBR131W	CCZ1	27.7507	2.81542	0.130988	6.55433e-105	2.21511e-103	2.05468	0.135564	1.05649e-53	3.35673e-52	0.679347	0.180997	6.146e-05	0.000161439
YBR132C	AGP2	11.3207	1.72298	0.163975	2.16543e-27	9.01158e-27	0.991584	0.167739	1.52349e-10	5.37118e-10	0.603696	0.219449	0.00240257	0.0047215
YBR133C	HSL7	51.4146	0.0775678	0.062348	0.183747	0.210757	-0.48716	0.0640323	1.45698e-14	7.02795e-14	0.562722	0.088215	8.95853e-11	5.51438e-10
YBR134W	YBR134W
YBR135W	CKS1	74.3476	0.361463	0.051207	1.48421e-12	3.47232e-12	0.200338	0.0538665	0.0001777	0.000353403	0.156882	0.0739019	0.0319301	0.0498885
YBR136W	MEC1	18.1471	1.51453	0.100358	1.18424e-52	1.06501e-51	0.493861	0.104703	1.19784e-06	3.02222e-06	0.961722	0.145745	4.08289e-12	2.87318e-11
YBR137W	YBR137W	58.7687	0.56987	0.0717859	1.49527e-15	4.02531e-15	0.316089	0.0730114	1.14361e-05	2.60316e-05	0.241875	0.10132	0.014851	0.0249443
YBR138C	YBR138C	13.1564	1.0803	0.123497	6.08572e-19	1.87628e-18	1.11844	0.130232	2.00252e-19	1.34669e-18	-0.0491506	0.169578	0.759544	0.798522
YBR139W	ATG42	139.761	1.44555	0.0824324	6.40709e-70	9.23805e-69	0.310368	0.0816835	0.000110872	0.000225483	1.10336	0.117286	2.27377e-22	3.497e-21
YBR140C	IRA1	35.7945	2.13883	0.0840251	3.74223e-145	2.51345e-143	1.46382	0.0876427	1.42143e-64	6.61587e-63	0.641023	0.118868	2.90282e-08	1.25939e-07
YBR141C	BMT2	8.66418	-0.202492	0.148172	0.152317	0.17677	0.307407	0.159609	0.0375115	0.0536919	-0.481592	0.2099	0.0121485	0.0207353
YBR142W	MAK5	30.5448	-0.691053	0.112931	5.81355e-10	1.20448e-09	0.0497928	0.113979	0.642582	0.695399	-0.702264	0.161116	4.4366e-06	1.38965e-05
YBR143C	SUP45	100.826	-0.00540705	0.0646545	0.929622	0.938109	0.211503	0.0696306	0.00202277	0.00352706	-0.215203	0.0962582	0.0230727	0.0374454
YBR144C	YBR144C
YBR145W	ADH5	49.5435	0.752531	0.149952	2.88783e-07	5.18012e-07	0.213253	0.14709	0.1182	0.153117	0.469134	0.202823	0.0120566	0.0206296
YBR146W	MRPS9	49.0717	-0.4752	0.0701329	9.96916e-12	2.24804e-11	0.0855938	0.0716947	0.204993	0.251489	-0.551714	0.0992476	1.49009e-08	6.74609e-08
YBR147W	RTC2	97.094	-0.511243	0.12363	2.71985e-05	4.3338e-05	-0.289007	0.122557	0.0134654	0.0207817	-0.193102	0.168413	0.226511	0.284937
YBR148W	YSW1	10.1582	0.28144	0.144021	0.0428234	0.0528421	-0.382263	0.144624	0.00508733	0.00831589	0.627867	0.199033	0.000618472	0.0013645
YBR149W	ARA1	305.194	0.98744	0.0713074	4.72201e-44	3.29671e-43	0.122181	0.0720907	0.0753261	0.101806	0.842744	0.100584	9.93807e-18	1.10317e-16
YBR150C	TBS1	21.2137	-0.499909	0.113525	8.29471e-06	1.37065e-05	-0.799653	0.118597	2.09734e-12	8.50802e-12	0.297848	0.158352	0.0488512	0.0733251
YBR151W	APD1	73.1172	-0.44591	0.0614052	3.16218e-13	7.65443e-13	-0.595005	0.0628065	9.91152e-22	7.71122e-21	0.151405	0.0869975	0.0773409	0.110821
YBR152W	SPP381	0.501512	-0.0742345	0.455362	0.838637	0.854746	-0.257809	0.400371	0.318964	0.375427	0.161597	0.484768	0.439592	0.503884
YBR153W	RIB7	22.598	0.140419	0.0912142	0.107158	0.126746	0.128048	0.0948205	0.153175	0.193927	0.00831417	0.127794	0.946649	0.956747
YBR154C	RPB5	104.159	-0.256569	0.0715645	0.000310945	0.00046073	0.372863	0.0730865	2.3188e-07	6.28372e-07	-0.619424	0.10168	5.35201e-10	2.99239e-09
YBR155W	CNS1	32.9784	-0.112661	0.0917136	0.195914	0.223505	-0.105881	0.0955334	0.23981	0.290376	-0.00384604	0.129399	0.975583	0.982154
YBR156C	SLI15	9.17262	0.869387	0.150621	3.51796e-09	7.0174e-09	0.44558	0.153087	0.00192795	0.00336725	0.350162	0.205258	0.0644658	0.0939971
YBR157C	ICS2	1.71346	2.44869	0.370371	1.39984e-13	3.43231e-13	0.934491	0.367737	0.000661534	0.00122006	0.844059	0.458963	0.0274343	0.043635
YBR158W	AMN1	37.1543	1.99414	0.0998248	8.40584e-91	2.02734e-89	0.594339	0.101965	1.99625e-09	6.5062e-09	1.34441	0.145359	3.0919e-22	4.68732e-21
YBR159W	IFA38	98.9219	0.705803	0.0429418	6.47018e-61	7.33564e-60	0.725332	0.0452896	2.07619e-58	8.04106e-57	-0.0224695	0.0620608	0.715144	0.760279
YBR160W	CDC28	52.6087	0.154361	0.0644973	0.0142952	0.0185092	-0.0657626	0.0662291	0.290228	0.345203	0.220366	0.0910918	0.0140965	0.0237825
YBR161W	CSH1	24.1746	0.0665394	0.10575	0.509299	0.544937	-0.834598	0.111489	7.8979e-15	3.85877e-14	0.880523	0.154021	1.74369e-09	9.03517e-09
YBR162C	TOS1	281.721	-0.209965	0.0413365	3.63062e-07	6.47968e-07	-0.791754	0.0424678	2.07727e-78	1.42901e-76	0.579259	0.05905	5.05e-23	8.16931e-22
YBR163W	EXO5	13.8102	1.7453	0.142456	4.09074e-36	2.26098e-35	1.01433	0.149116	4.03991e-13	1.7371e-12	0.626914	0.195672	0.000513275	0.00114671
YBR164C	ARL1	82.1117	-0.201907	0.0500975	5.32199e-05	8.32503e-05	0.0256946	0.0504322	0.585784	0.643513	-0.227167	0.0720036	0.00143297	0.00295389
YBR165W	UBS1	17.1283	0.0230326	0.11584	0.835594	0.852627	0.14352	0.121456	0.207421	0.254293	-0.119771	0.165169	0.445273	0.509512
YBR166C	TYR1	45.3763	-0.426893	0.0641542	2.39472e-11	5.28991e-11	-0.412846	0.0676861	6.73902e-10	2.26886e-09	-0.00841965	0.0923733	0.926243	0.940422
YBR167C	POP7	37.1589	-0.560962	0.0752715	6.75267e-14	1.6861e-13	-0.172362	0.080034	0.0257409	0.0378027	-0.371935	0.108083	0.000435092	0.000989966
YBR168W	PEX32	18.0008	1.73005	0.135794	9.32244e-39	5.51448e-38	0.836925	0.13959	2.19397e-10	7.66374e-10	0.786548	0.189599	7.32096e-06	2.22608e-05
YBR169C	SSE2	66.1799	0.300337	0.0883618	0.000606373	0.00087501	-1.69473	0.0911005	3.9674e-79	2.76987e-77	1.9849	0.127213	4.35458e-56	4.71538e-54
YBR170C	NPL4	35.195	-0.0253917	0.0991729	0.788926	0.809523	-0.697334	0.105565	9.10248e-12	3.5487e-11	0.65307	0.144753	2.32247e-06	7.65405e-06
YBR171W	SEC66	67.3111	-0.553798	0.0615992	1.83615e-19	5.77512e-19	-0.389631	0.0637198	6.4585e-10	2.17995e-09	-0.15622	0.0878803	0.0711834	0.102803
YBR172C	SMY2	40.7885	-1.26953	0.0818596	4.86061e-55	4.68065e-54	-0.792916	0.0855535	2.70274e-21	2.06937e-20	-0.446989	0.116201	8.23692e-05	0.000211852
YBR173C	UMP1	160.995	-0.813475	0.0467638	4.61607e-68	6.20073e-67	-0.703059	0.0482091	8.30202e-49	2.22477e-47	-0.105518	0.0667346	0.110935	0.152562
YBR174C	YBR174C
YBR175W	SWD3	43.0606	-1.221	0.0814361	1.52371e-51	1.32321e-50	-1.53023	0.0865106	5.98866e-72	3.53065e-70	0.296786	0.115893	0.00875071	0.0153644
YBR176W	ECM31	25.0854	-1.06182	0.0799139	8.19686e-41	5.15926e-40	-0.906787	0.0868879	1.23148e-26	1.24225e-25	-0.137898	0.115332	0.220898	0.278735
YBR177C	EHT1	120.096	-0.681895	0.0665134	7.35146e-25	2.80827e-24	-0.761745	0.0666019	4.64751e-31	6.04404e-30	0.0839901	0.0929157	0.358265	0.422059
YBR178W	YBR178W
YBR179C	FZO1	18.9923	-0.708493	0.0967996	1.51121e-13	3.70027e-13	-0.6898	0.101961	3.18003e-12	1.27538e-11	-0.00269086	0.136857	0.983769	0.9888
YBR180W	DTR1	3.33556	0.828988	0.319127	0.00394478	0.00534909	-0.0655155	0.278042	0.769667	0.806926	0.663073	0.411049	0.0257597	0.0413558
YBR181C	RPS6B
YBR182C	SMP1	7.22487	-1.43683	0.190033	3.37263e-15	8.92994e-15	-1.92437	0.207387	2.15367e-22	1.73142e-21	0.38483	0.251422	0.0822194	0.117223
YBR183W	YPC1	10.0461	0.583713	0.171382	0.000455516	0.000664185	0.623139	0.172339	8.83367e-05	0.000181251	-0.0685007	0.226353	0.738169	0.780691
YBR184W	YBR184W	6.63607	-0.465899	0.18042	0.00744276	0.00985803	-0.277889	0.181035	0.0902161	0.120303	-0.13401	0.239311	0.530685	0.592804
YBR185C	MBA1	37.5279	-1.09214	0.0759591	1.95925e-47	1.52431e-46	-0.577901	0.0779584	4.78226e-14	2.2239e-13	-0.489389	0.107538	3.27981e-06	1.05535e-05
YBR186W	PCH2	0.568107	0.845412	0.505765	0.030559	0.0382844	-0.173686	0.397976	0.495494	0.553726	0.646394	0.602719	0.0265656	0.0424442
YBR187W	GDT1	67.687	-0.435318	0.0630976	4.36812e-12	1.00031e-11	0.143883	0.0661368	0.0245334	0.0361797	-0.570496	0.0903031	1.46892e-10	8.82682e-10
YBR188C	NTC20	18.3049	0.633596	0.098443	8.23351e-11	1.77086e-10	0.353898	0.103505	0.000436181	0.00082509	0.253787	0.139955	0.0591927	0.0872193
YBR189W	RPS9B	590.69	-5.02108	0.146073	1.46895e-260	3.1177e-258	-3.49704	0.146382	3.2237e-128	7.43693e-126	-1.42754	0.211744	2.87169e-13	2.3192e-12
YBR190W	YBR190W
YBR191W	RPL21A	562.68	-1.56142	0.113161	1.37923e-44	9.79676e-44	0.0714514	0.108544	0.484374	0.54336	-1.61377	0.161957	7.03245e-25	1.26061e-23
YBR192W	RIM2	25.7453	0.0104456	0.0932171	0.906727	0.917626	0.330586	0.0996277	0.000656077	0.00121135	-0.312867	0.136258	0.0174185	0.0289544
YBR193C	MED8	14.8098	-0.129444	0.122434	0.267337	0.298881	-0.241924	0.125806	0.0420413	0.0596926	0.112149	0.169448	0.483817	0.546547
YBR194W	AIM4	33.636	-0.245538	0.0836002	0.00296238	0.00404591	-0.367139	0.0860287	1.36566e-05	3.08086e-05	0.124212	0.117936	0.279905	0.341813
YBR195C	MSI1	29.5985	0.0908371	0.0776878	0.215519	0.24466	-0.374383	0.0810269	2.61721e-06	6.35558e-06	0.461332	0.110672	1.94591e-05	5.56005e-05
YBR196C	PGI1	728.702	0.0428259	0.055643	0.407478	0.442958	0.0858715	0.0576049	0.11377	0.148066	-0.0419852	0.0793752	0.592664	0.650398
YBR197C	YBR197C	1.85637	0.234019	0.234432	0.284405	0.316629	0.353511	0.241837	0.0855364	0.114495	-0.13861	0.304323	0.582794	0.64169
YBR198C	TAF5	27.2477	0.829366	0.0765132	1.11511e-27	4.69212e-27	0.476028	0.0805551	1.83847e-09	6.02154e-09	0.333178	0.109672	0.00189157	0.00380151
YBR199W	KTR4	119.003	0.981232	0.0668446	3.1916e-49	2.57757e-48	0.0482266	0.0663078	0.439278	0.498569	0.912487	0.0951342	1.10596e-22	1.73546e-21
YBR200W	BEM1	25.902	-0.0021773	0.0908343	0.98	0.983336	-0.637078	0.0987493	3.35138e-11	1.24964e-10	0.621031	0.134687	1.64125e-06	5.52921e-06
YBR201W	DER1	23.7909	0.0838269	0.103992	0.396996	0.432805	-0.079115	0.105989	0.427847	0.48674	0.163239	0.146687	0.245669	0.305703
YBR202W	MCM7	40.214	-0.612698	0.0682358	1.89601e-19	5.95632e-19	-0.950211	0.0720051	5.11306e-41	1.03946e-39	0.335056	0.0976985	0.000484589	0.0010895
YBR203W	COS111	7.36937	0.00204055	0.190593	0.990992	0.991553	-0.530798	0.193716	0.00242375	0.00416464	0.491159	0.259203	0.0300105	0.0471949
YBR204C	LDH1	30.756	0.0148507	0.0935257	0.868109	0.88258	-0.382112	0.0982842	6.71212e-05	0.000139555	0.388931	0.135659	0.00298853	0.00577884
YBR205W	KTR3	61.6224	0.405445	0.065458	5.01507e-10	1.04271e-09	0.0293603	0.0657161	0.636023	0.688722	0.364595	0.0935378	7.36087e-05	0.000190987
YBR206W	YBR206W
YBR207W	FTH1	60.53	0.248373	0.0679833	0.000240267	0.000358912	0.629374	0.0703337	1.15011e-19	7.89457e-19	-0.378462	0.0967452	6.88511e-05	0.000179609
YBR208C	DUR1,2	123.676	0.831754	0.113863	1.36124e-13	3.34078e-13	0.558397	0.113554	3.53622e-07	9.42875e-07	0.238671	0.155974	0.109041	0.150357
YBR209W	YBR209W
YBR210W	ERV15	37.9602	1.67026	0.0898863	1.52136e-78	2.80289e-77	1.76117	0.0951176	2.1007e-78	1.42901e-76	-0.0854544	0.126733	0.486712	0.549116
YBR211C	AME1	22.733	1.62195	0.116836	3.34564e-45	2.42513e-44	1.01226	0.121436	3.00722e-18	1.88832e-17	0.54545	0.161825	0.000380238	0.000876431
YBR212W	NGR1	66.8514	0.350477	0.065465	7.66339e-08	1.42374e-07	-0.418247	0.0667433	2.30927e-10	8.04529e-10	0.759108	0.0933166	1.09552e-16	1.13311e-15
YBR213W	MET8	283.562	-1.31134	0.158866	2.0567e-17	5.96982e-17	-0.574268	0.154735	7.49893e-05	0.000155064	-0.624804	0.213783	0.00137034	0.0028325
YBR214W	SDS24	39.7299	1.94961	0.12148	6.52699e-60	7.20004e-59	0.183055	0.119023	0.10264	0.135038	1.72086	0.173348	5.66628e-25	1.02263e-23
YBR215W	HPC2	17.0065	-0.057084	0.0999372	0.549011	0.583545	-0.260134	0.10728	0.0117696	0.0182975	0.19771	0.144441	0.154939	0.204402
YBR216C	YBP1	23.3529	0.706455	0.104847	9.73437e-12	2.19603e-11	0.297994	0.107211	0.00404513	0.00671573	0.375097	0.146764	0.00761428	0.0135484
YBR217W	ATG12	18.2658	-0.63934	0.134087	1.22634e-06	2.12855e-06	-0.191556	0.136151	0.131654	0.168978	-0.395303	0.18502	0.0225391	0.0366399
YBR218C	PYC2	221.068	-0.51732	0.0760761	8.07753e-12	1.82769e-11	-0.408168	0.0760598	5.11754e-08	1.47976e-07	-0.0995699	0.1062	0.338743	0.402007
YBR219C	YBR219C
YBR220C	YBR220C	27.4509	1.28274	0.0911088	7.78794e-46	5.71546e-45	1.0421	0.0960453	6.4765e-29	7.55259e-28	0.217875	0.128317	0.079808	0.11414
YBR221C	PDB1	253.43	0.660484	0.0346646	4.02956e-81	7.86061e-80	0.334338	0.0356203	4.67353e-21	3.52241e-20	0.322722	0.049584	6.15214e-11	3.85854e-10
YBR222C	PCS60	108.404	-0.616177	0.0837645	1.3061e-13	3.20841e-13	-0.969504	0.0847582	1.32937e-31	1.77673e-30	0.347848	0.116626	0.00220181	0.00436089
YBR223C	TDP1	17.1704	-1.26243	0.130165	4.92256e-23	1.77802e-22	-1.79688	0.135583	5.71639e-42	1.18946e-40	0.477046	0.178709	0.0044641	0.0082936
YBR224W	YBR224W
YBR225W	YBR225W	7.9954	-0.114955	0.156606	0.440717	0.47665	0.230707	0.15906	0.115193	0.149698	-0.327135	0.214429	0.0950535	0.133392
YBR226C	YBR226C
YBR227C	MCX1	37.5169	-0.0101815	0.0677282	0.874016	0.888075	-0.272672	0.0743283	0.000197753	0.000391229	0.258622	0.101727	0.00950164	0.0166114
YBR228W	SLX1	13.8995	0.427981	0.12899	0.000739922	0.00105851	-0.260182	0.132334	0.0371185	0.0531724	0.651704	0.18169	0.000120365	0.000301112
YBR229C	ROT2	25.4927	1.5534	0.0953106	5.55787e-61	6.31881e-60	1.0612	0.0990953	2.71357e-28	3.04698e-27	0.454489	0.133317	0.000415148	0.000949881
YBR230C	OM14	157.439	1.60148	0.0704434	9.25543e-116	3.7488e-114	-0.0571838	0.0691885	0.379508	0.437945	1.65369	0.100132	8.1355e-63	1.30809e-60
YBR231C	SWC5	27.8304	-0.0542316	0.09092	0.530517	0.565245	-0.257834	0.096236	0.00578438	0.00938289	0.198099	0.131052	0.118555	0.161638
YBR232C	YBR232C
YBR233W	PBP2	31.5683	-0.580567	0.0864499	1.34693e-11	3.01427e-11	-0.778633	0.0899061	7.22799e-19	4.69421e-18	0.201138	0.12201	0.089853	0.127068
YBR234C	ARC40	189.709	-0.0025652	0.0365107	0.93906	0.946373	-0.385601	0.0409187	2.96021e-21	2.25673e-20	0.381107	0.0568004	1.49114e-11	9.91474e-11
YBR235W	VHC1	89.2747	1.445	0.0776843	2.67483e-78	4.91096e-77	0.321481	0.0780369	2.86532e-05	6.2207e-05	1.09426	0.111158	3.31433e-24	5.70968e-23
YBR236C	ABD1	40.0333	0.784853	0.0763009	4.38157e-25	1.68468e-24	0.555195	0.0791872	9.90425e-13	4.14447e-12	0.213423	0.10838	0.0439794	0.0666347
YBR237W	PRP5	13.4104	0.945017	0.125662	2.12067e-14	5.4254e-14	0.357158	0.128345	0.00357496	0.00597253	0.525527	0.175256	0.00142229	0.00293415
YBR238C	YBR238C	2.21164	-1.60733	0.275708	2.351e-10	4.96592e-10	-0.329123	0.269485	0.135937	0.173929	-0.905254	0.392169	0.00256157	0.005008
YBR239C	ERT1	8.07042	-0.827658	0.146023	7.04326e-09	1.38773e-08	-0.474382	0.149248	0.000740644	0.00135746	-0.289307	0.199522	0.117784	0.1607
YBR240C	THI2	1.93284	1.65409	0.301624	1.46309e-09	2.9687e-09	-0.0545575	0.261033	0.800068	0.833529	1.49726	0.458608	1.21501e-05	3.59758e-05
YBR241C	YBR241C	33.773	2.37386	0.112734	7.01471e-101	2.15145e-99	0.738636	0.112077	8.203e-12	3.20509e-11	1.56858	0.161374	3.15747e-24	5.45717e-23
YBR242W	YBR242W	37.2629	-1.07083	0.0705143	1.27845e-52	1.14779e-51	-0.343665	0.0742743	2.70275e-06	6.55429e-06	-0.702959	0.102004	2.04668e-12	1.49996e-11
YBR243C	ALG7	53.1818	-0.0356307	0.056171	0.496161	0.53206	-0.476535	0.06102	3.10236e-15	1.5603e-14	0.434146	0.0834495	1.36352e-07	5.38708e-07
YBR244W	GPX2	82.7634	-1.03175	0.0930524	4.6032e-29	2.02358e-28	-0.271206	0.093312	0.00285668	0.00485351	-0.723297	0.130855	1.06948e-08	4.91736e-08
YBR245C	ISW1	37.4711	0.301306	0.0688364	1.09983e-05	1.79671e-05	0.292213	0.0721329	4.04466e-05	8.59814e-05	0.00437048	0.0986924	0.963989	0.971865
YBR246W	RRT2	58.3291	0.0825543	0.0649173	0.175326	0.201796	-0.0200915	0.0645831	0.742133	0.783945	0.105889	0.0918626	0.241205	0.301099
YBR247C	ENP1	29.64	-0.72669	0.109	1.53397e-11	3.4256e-11	-0.109724	0.112483	0.299036	0.354963	-0.572968	0.154716	0.000104295	0.000263519
YBR248C	HIS7	185.1	0.170299	0.0888374	0.0471235	0.0578389	-0.276555	0.0873104	0.00121176	0.0021634	0.437858	0.121956	0.000219539	0.000527091
YBR249C	ARO4	293.62	-0.0174141	0.115588	0.875077	0.888983	0.278157	0.117762	0.0135589	0.0209199	-0.287139	0.162611	0.0635691	0.0928427
YBR250W	SPO23	1.71986	0.744498	0.300333	0.00654561	0.00871106	-0.376584	0.29537	0.106746	0.139874	0.957089	0.445269	0.00272269	0.00530151
YBR251W	MRPS5	38.0386	-0.270541	0.0712574	0.000135316	0.000205609	0.262291	0.0739435	0.000319064	0.000616291	-0.523211	0.101929	1.69737e-07	6.58033e-07
YBR252W	DUT1	128.385	-0.486758	0.0529966	3.29542e-20	1.06945e-19	-0.127159	0.055088	0.017458	0.0265193	-0.352107	0.0754739	2.5118e-06	8.22185e-06
YBR253W	SRB6	64.6296	-0.491162	0.0607307	4.83632e-16	1.32755e-15	-0.607372	0.0637059	5.28977e-22	4.16432e-21	0.119576	0.0871575	0.164006	0.214705
YBR254C	TRS20	26.927	-1.18515	0.0902567	4.58568e-40	2.82269e-39	-1.05262	0.0958828	1.49161e-29	1.79061e-28	-0.115594	0.127611	0.350308	0.413879
YBR255W	MTC4	21.6885	0.12296	0.101152	0.201564	0.229309	-0.554212	0.106175	7.378e-08	2.09346e-07	0.663621	0.144427	1.61666e-06	5.44982e-06
YBR256C	RIB5	224.119	0.737351	0.0704572	7.28063e-26	2.88291e-25	1.13242	0.071639	5.59274e-58	2.0898e-56	-0.388066	0.09885	6.44763e-05	0.000168694
YBR257W	POP4	30.7907	-0.221179	0.071962	0.00192259	0.002667	0.0138124	0.0749384	0.845942	0.872414	-0.229408	0.104693	0.0254147	0.0408514
YBR258C	SHG1	21.7921	-0.630122	0.0918774	4.71175e-12	1.07715e-11	-0.690539	0.097422	3.25157e-13	1.41185e-12	0.0713295	0.130702	0.573304	0.632554
YBR259W	YBR259W	8.30247	-0.0928222	0.151489	0.52042	0.55538	-0.427543	0.157174	0.00361229	0.00603109	0.319718	0.209829	0.0967659	0.135502
YBR260C	RGD1	29.1753	0.0397597	0.0818181	0.608887	0.641532	-0.246041	0.0873389	0.00389345	0.00646999	0.283527	0.119385	0.0147407	0.0247828
YBR261C	TAE1	32.7349	-0.634704	0.0763573	6.33272e-17	1.79591e-16	0.14569	0.0814963	0.0614285	0.0844964	-0.764239	0.110674	1.38916e-12	1.04256e-11
YBR262C	MIC12	97.5884	0.0914638	0.0612059	0.11255	0.132916	0.775858	0.0613946	2.08605e-37	3.55903e-36	-0.674886	0.0852233	1.06038e-15	1.03808e-14
YBR263W	SHM1	75.8407	-1.11046	0.0633957	2.82613e-69	3.96705e-68	-0.559813	0.0656131	5.98124e-18	3.68486e-17	-0.53228	0.0905217	2.51394e-09	1.2728e-08
YBR264C	YPT10	42.2032	0.829156	0.0728219	2.44888e-30	1.12209e-29	0.696269	0.0764956	2.09431e-20	1.50984e-19	0.119964	0.103988	0.239023	0.298905
YBR265W	TSC10	58.7124	0.326736	0.0604485	5.84714e-08	1.0932e-07	0.0280802	0.0612407	0.626514	0.68023	0.289833	0.0869014	0.000718468	0.00156945
YBR266C	SLM6
YBR267W	REI1	27.4973	-0.17191	0.11636	0.122771	0.144248	0.428924	0.11891	0.000181196	0.000359949	-0.582095	0.16271	0.000167364	0.000410556
YBR268W	MRPL37	66.4063	-0.350374	0.0617374	1.2322e-08	2.39489e-08	-0.0928244	0.0643067	0.126327	0.162692	-0.248256	0.0877119	0.00408814	0.00764599
YBR269C	SDH8	113.465	0.235094	0.0777375	0.0022495	0.00310182	-0.470471	0.0778485	8.21434e-10	2.74467e-09	0.693926	0.109252	7.25419e-11	4.51769e-10
YBR270C	BIT2	8.08875	1.56213	0.161659	2.2583e-23	8.27525e-23	0.48293	0.163963	0.00153992	0.0027227	0.935465	0.231563	5.72676e-06	1.76356e-05
YBR271W	EFM2	11.5989	0.516902	0.122039	1.74063e-05	2.81493e-05	0.505031	0.132333	6.36626e-05	0.000132676	-0.011738	0.173568	0.943031	0.953817
YBR272C	HSM3	34.4278	0.6416	0.0952498	1.08377e-11	2.4356e-11	0.320223	0.0968587	0.000698195	0.00128543	0.297441	0.133385	0.0210092	0.0343528
YBR273C	UBX7	24.4059	0.0105372	0.0856292	0.897444	0.910137	0.0437808	0.0888329	0.602356	0.658311	-0.034616	0.125135	0.775812	0.812887
YBR274W	CHK1	21.8923	0.797326	0.0946411	1.89901e-17	5.5242e-17	0.311544	0.0981638	0.00112033	0.00201036	0.453895	0.134234	0.000463894	0.00104831
YBR275C	RIF1	14.5454	-0.149585	0.109734	0.153454	0.178051	0.0338118	0.108738	0.741797	0.783903	-0.178356	0.152083	0.219805	0.277687
YBR276C	PPS1	49.4636	0.939488	0.0630566	1.34003e-50	1.13946e-49	0.407735	0.0657738	3.64131e-10	1.24973e-09	0.515138	0.090507	7.15709e-09	3.36961e-08
YBR277C	YBR277C
YBR278W	DPB3	58.0209	0.305594	0.0726184	2.34487e-05	3.75774e-05	-0.26109	0.0743468	0.000364852	0.000699136	0.556046	0.103207	3.64952e-08	1.55913e-07
YBR279W	PAF1	35.2142	0.341104	0.0749532	4.76913e-06	7.99021e-06	0.564628	0.0787624	3.07054e-13	1.33653e-12	-0.224997	0.107245	0.0322617	0.0503769
YBR280C	SAF1	23.0606	-0.214063	0.142658	0.116897	0.137681	-1.30455	0.146918	8.36149e-21	6.19637e-20	1.023	0.203456	3.40369e-08	1.46399e-07
YBR281C	DUG2	66.3527	0.578388	0.119795	9.8504e-07	1.71702e-06	0.653802	0.120578	1.6266e-08	4.91779e-08	-0.0885766	0.163776	0.569317	0.629595
YBR282W	MRPL27	68.2322	-1.01849	0.0576094	2.02552e-70	2.9445e-69	-0.615999	0.0592554	8.78803e-26	8.47805e-25	-0.389744	0.0819795	1.49973e-06	5.075e-06
YBR283C	SSH1	147.552	0.147536	0.0364906	5.12151e-05	8.02325e-05	-0.211562	0.0381949	2.715e-08	8.03447e-08	0.357386	0.05269	8.88389e-12	6.04332e-11
YBR284W	YBR284W	2.60339	0.848412	0.235039	0.000135553	0.000205911	-0.450017	0.236236	0.0265542	0.0389002	1.21491	0.362718	2.24539e-05	6.33052e-05
YBR285W	YBR285W	21.8637	2.87478	0.165965	1.30435e-69	1.85546e-68	-0.890663	0.161679	2.8619e-09	9.25365e-09	3.80504	0.231074	1.82731e-60	2.48608e-58
YBR286W	APE3	259.637	0.77373	0.0510305	3.48018e-52	3.09311e-51	-0.256923	0.0511132	4.20918e-07	1.11169e-06	1.02357	0.0725027	2.30656e-46	1.74838e-44
YBR287W	YBR287W	74.599	0.697001	0.101357	3.76986e-12	8.65925e-12	0.291932	0.101133	0.00294388	0.00499209	0.37552	0.140374	0.00546086	0.0100122
YBR288C	APM3	44.1098	1.1428	0.0712553	1.6537e-58	1.75491e-57	0.694037	0.0744695	2.78853e-21	2.13198e-20	0.42707	0.101725	1.82823e-05	5.23508e-05
YBR289W	SNF5	33.0177	0.269556	0.0753449	0.000318002	0.000470583	-0.183732	0.0791908	0.0167499	0.0255095	0.444025	0.107728	2.55952e-05	7.15155e-05
YBR290W	BSD2	31.3041	0.431225	0.0848923	3.15588e-07	5.64759e-07	0.721783	0.0890718	1.10677e-16	6.27405e-16	-0.290367	0.120673	0.0134644	0.0227814
YBR291C	CTP1	255.759	-1.33681	0.110029	7.23963e-35	3.88015e-34	-0.0815988	0.106394	0.415169	0.473928	-1.20976	0.15774	6.13098e-16	6.04665e-15
YBR292C	YBR292C
YBR293W	VBA2	85.4447	-0.494683	0.185875	0.00575378	0.00768425	-0.409303	0.180399	0.0129788	0.0200833	-0.04222	0.240761	0.844314	0.87226
YBR294W	SUL1	629.914	-0.965422	0.148539	2.95429e-11	6.50165e-11	-0.391134	0.144656	0.00417402	0.00691241	-0.495769	0.20011	0.00741499	0.0132471
YBR295W	PCA1	32	-1.36637	0.136404	1.43579e-24	5.41841e-24	-1.92117	0.141116	4.68547e-44	1.05792e-42	0.488121	0.185955	0.00494058	0.00912133
YBR296C	PHO89	13.0054	2.37898	0.222247	3.5782e-29	1.58348e-28	0.368752	0.210918	0.0475347	0.0669549	1.80511	0.326002	3.14358e-10	1.81677e-09
YBR297W	MAL33
YBR298C	MAL31
YBR299W	MAL32
YBR300C	YBR300C
YBR301W	PAU24
YBR302C	COS2
YCL001W	RER1	162.299	0.190404	0.049021	9.81598e-05	0.000150487	0.116377	0.0511248	0.018873	0.0285055	0.0712375	0.0698568	0.303638	0.366076
YCL002C	YCL002C	16.9521	0.00737678	0.0984377	0.937604	0.945265	0.176503	0.107895	0.0842956	0.112891	-0.167447	0.144528	0.228276	0.287022
YCL004W	PGS1	7.80512	0.901586	0.154425	2.21393e-09	4.4615e-09	0.332718	0.157168	0.022804	0.0339025	0.481246	0.211967	0.0130044	0.0220733
YCL005W	LDB16	25.6209	0.671715	0.0942355	6.5065e-13	1.54883e-12	0.825329	0.0993983	1.19419e-17	7.19223e-17	-0.159545	0.133197	0.215891	0.273197
YCL007C	YCL007C
YCL008C	STP22	56.9193	0.819158	0.0708894	3.52454e-31	1.66381e-30	0.0420135	0.0710093	0.530581	0.589443	0.755642	0.101292	2.36203e-14	2.09231e-13
YCL009C	ILV6	552.429	-0.216341	0.0698052	0.00176901	0.00245849	0.160237	0.0700693	0.0184475	0.0279026	-0.37061	0.0973323	0.000108237	0.00027283
YCL010C	SGF29	9.00617	1.40253	0.165483	2.2692e-18	6.84113e-18	0.529611	0.167668	0.000656127	0.00121135	0.732377	0.229763	0.000377236	0.000869888
YCL011C	GBP2	81.3777	0.636448	0.0529509	1.89497e-33	9.65871e-33	0.370948	0.0556535	1.83963e-11	6.98219e-11	0.257871	0.0763587	0.000633818	0.00139661
YCL014W	BUD3	21.3924	-1.14494	0.0921983	4.91128e-36	2.70324e-35	-1.12626	0.0980412	3.22818e-32	4.47225e-31	-0.00866245	0.130139	0.945163	0.955426
YCL016C	DCC1	28.6833	0.0381382	0.10127	0.693499	0.721511	-0.685764	0.107951	5.13356e-11	1.87853e-10	0.707143	0.148028	5.32043e-07	1.92042e-06
YCL017C	NFS1	47.0379	-0.414257	0.0710383	4.66075e-09	9.25176e-09	0.0660526	0.0728624	0.335413	0.393043	-0.472214	0.101233	1.95648e-06	6.53308e-06
YCL018W	LEU2	21.693	-3.97989	0.146897	4.40843e-163	4.10371e-161	-3.02427	0.142561	9.78838e-102	1.15416e-99	-0.851642	0.199987	4.00743e-06	1.26568e-05
YCL019W	YCL019W
YCL020W	YCL020W
YCL022C	YCL022C
YCL023C	YCL023C
YCL024W	KCC4	8.0097	0.568964	0.142478	4.66343e-05	7.32726e-05	0.353657	0.148977	0.0114019	0.0177675	0.170682	0.197197	0.351928	0.41548
YCL025C	AGP1	298.778	1.6837	0.0700883	5.16921e-129	2.61217e-127	0.981069	0.0705209	2.46945e-45	5.84952e-44	0.676909	0.0982254	2.01371e-12	1.47784e-11
YCL027W	FUS1	4.37913	-0.0322037	0.236277	0.883932	0.896981	0.188446	0.233332	0.345467	0.403311	-0.198776	0.30636	0.432397	0.496494
YCL028W	RNQ1	40.9657	0.310716	0.0683091	4.91459e-06	8.22354e-06	0.524642	0.0717282	1.20483e-13	5.41766e-13	-0.215138	0.0979575	0.0252963	0.0406857
YCL029C	BIK1	39.7624	0.0903494	0.0735657	0.192686	0.220012	0.175632	0.0767348	0.0182466	0.0276381	-0.0829982	0.103944	0.414999	0.479422
YCL030C	HIS4	1032.64	0.414694	0.109286	0.000123816	0.000188676	0.14807	0.108292	0.147134	0.186903	0.242962	0.149828	0.090583	0.127964
YCL031C	RRP7	55.2292	-0.1608	0.0699428	0.0183588	0.0234784	0.176066	0.0724959	0.0126134	0.0195463	-0.332625	0.0986901	0.000605495	0.00133809
YCL032W	STE50	39.9577	0.497365	0.0925801	6.10492e-08	1.14059e-07	0.127108	0.0947336	0.155784	0.1969	0.347367	0.129859	0.00577984	0.0105135
YCL033C	MXR2	107.97	0.168911	0.0544225	0.0017535	0.00244009	-0.274676	0.0553564	5.7335e-07	1.49567e-06	0.439378	0.0770946	8.18243e-09	3.81511e-08
YCL034W	LSB5	125.313	0.618629	0.074295	5.72809e-17	1.62792e-16	0.0429476	0.0728619	0.532314	0.591014	0.55653	0.104465	5.12154e-08	2.14144e-07
YCL035C	GRX1	299.101	0.619835	0.056059	1.40176e-28	6.08655e-28	-0.0513137	0.0560031	0.326297	0.383462	0.665124	0.0791988	1.753e-17	1.92975e-16
YCL036W	GFD2	20.3928	-0.663069	0.129692	2.03206e-07	3.66739e-07	0.250966	0.13448	0.0472322	0.0665995	-0.869656	0.18753	6.0693e-07	2.17006e-06
YCL037C	SRO9	14.3235	-1.06125	0.140498	1.23409e-14	3.18642e-14	0.04374	0.139701	0.736628	0.779371	-1.03898	0.206029	3.5064e-08	1.50283e-07
YCL038C	ATG22	15.8296	-0.417933	0.126977	0.000819584	0.00116744	-1.3743	0.135512	4.06226e-26	3.99895e-25	0.898149	0.182826	1.16888e-07	4.65622e-07
YCL039W	GID7	27.1699	0.982074	0.109634	1.1904e-19	3.77317e-19	0.18597	0.110474	0.0756958	0.102251	0.745358	0.154011	3.36994e-07	1.25656e-06
YCL040W	GLK1	479.561	4.03111	0.103571	0	0	2.08199	0.103527	9.59821e-92	1.03935e-89	1.90485	0.146754	6.97457e-40	3.70071e-38
YCL041C	YCL041C
YCL042W	YCL042W
YCL043C	PDI1	303.287	0.270918	0.049968	5.50264e-08	1.0306e-07	0.484075	0.0505417	5.27138e-22	4.15601e-21	-0.21339	0.0706718	0.0023188	0.0045738
YCL044C	MGR1	37.1435	0.216655	0.0679696	0.00131633	0.00185215	0.0374654	0.0701661	0.571657	0.629297	0.171312	0.0979422	0.0746584	0.107325
YCL045C	EMC1	82.1904	-0.00102836	0.0454672	0.980633	0.983413	-0.443477	0.0513407	3.38943e-18	2.1233e-17	0.439752	0.0704505	2.85409e-10	1.66416e-09
YCL046W	YCL046W
YCL047C	POF1	18.2405	-0.507924	0.108283	2.10725e-06	3.6068e-06	-0.246325	0.112483	0.0220573	0.0328845	-0.235238	0.151964	0.105825	0.146303
YCL048W	SPS22	1.52742	1.99035	0.473624	2.95692e-07	5.30049e-07	0.424642	0.368077	0.102014	0.134404	0.809738	0.544407	0.0153279	0.0256588
YCL049C	YCL049C	31.1216	-0.650706	0.10332	1.97881e-10	4.19311e-10	-0.892059	0.108116	1.24714e-17	7.49415e-17	0.241871	0.144596	0.0814303	0.116335
YCL050C	APA1	132.826	-0.425381	0.0704105	1.28417e-09	2.61066e-09	0.134486	0.0725143	0.0528177	0.0734409	-0.549992	0.0996074	1.90138e-08	8.45659e-08
YCL051W	LRE1	22.806	0.0820043	0.0952439	0.364579	0.399764	0.209763	0.0997934	0.0285075	0.0415894	-0.124783	0.135082	0.33981	0.402912
YCL052C	PBN1	40.0294	1.1576	0.09608	4.49822e-34	2.36312e-33	0.894567	0.0989345	1.20401e-20	8.79954e-20	0.236147	0.133776	0.067635	0.0982133
YCL054W	SPB1	44.2184	-0.891721	0.112664	1.08153e-15	2.93018e-15	-0.17857	0.115177	0.100454	0.132656	-0.661529	0.1587	1.18083e-05	3.50419e-05
YCL055W	KAR4	15.6782	-0.491381	0.104152	1.87632e-06	3.2261e-06	-0.159891	0.109279	0.121262	0.156754	-0.303764	0.147271	0.0317162	0.0495834
YCL056C	PEX34	37.3167	-0.352956	0.0783327	5.85279e-06	9.75036e-06	-0.438196	0.0819041	5.19545e-08	1.49984e-07	0.0901989	0.111742	0.40889	0.473292
YCL057W	PRD1	103.576	0.549136	0.0574832	9.44178e-22	3.25947e-21	0.136191	0.0598302	0.0189948	0.0286732	0.403232	0.0818981	6.02045e-07	2.15405e-06
YCL058C	FYV5
YCL059C	KRR1	37.212	-0.176107	0.107513	0.0879908	0.10494	0.623048	0.111549	7.3882e-09	2.31415e-08	-0.780318	0.152844	8.31265e-08	3.38503e-07
YCL061C	MRC1	16.7334	0.578668	0.102023	1.01407e-08	1.98182e-08	0.671247	0.108607	1.65338e-10	5.80599e-10	-0.104056	0.144741	0.454884	0.519392
YCL063W	VAC17	17.8433	-1.40942	0.125177	1.9951e-30	9.15744e-30	-0.339629	0.124547	0.00438194	0.00724316	-0.993118	0.178593	2.66173e-09	1.34378e-08
YCL064C	CHA1	23.3431	-0.400596	0.137699	0.00296616	0.00405003	0.440466	0.136881	0.000717029	0.00131645	-0.801367	0.19334	7.46082e-06	2.266e-05
YCL065W	YCL065W
YCL066W	HMLALPHA1
YCL067C	HMLALPHA2
YCL068C	YCL068C
YCL069W	VBA3
YCL074W	YCL074W
YCL075W	YCL075W
YCL076W	YCL076W
YCR001W	YCR001W
YCR002C	CDC10	135.767	-0.433736	0.0509035	1.3271e-17	3.88181e-17	-0.413583	0.0525113	2.14862e-15	1.09621e-14	-0.0167271	0.0726988	0.816205	0.847346
YCR003W	MRPL32	54.3443	-0.66782	0.0682282	8.19293e-23	2.93926e-22	-0.280705	0.0698166	4.68673e-05	9.89567e-05	-0.37337	0.096786	8.62791e-05	0.000221158
YCR004C	YCP4	227.201	0.670043	0.0522634	8.13643e-38	4.71824e-37	0.0212138	0.0503063	0.652516	0.704139	0.637928	0.0738144	2.29278e-18	2.69148e-17
YCR005C	CIT2	200.928	-1.20003	0.13277	3.12568e-20	1.01685e-19	-0.362477	0.129715	0.00341208	0.00573108	-0.758662	0.183607	9.50477e-06	2.85089e-05
YCR006C	YCR006C
YCR007C	YCR007C
YCR008W	SAT4	54.716	0.288543	0.0738362	8.53052e-05	0.000131464	0.265919	0.0759657	0.000377852	0.000722221	0.0174591	0.10467	0.864927	0.889744
YCR009C	RVS161	63.304	0.471805	0.0760178	4.37171e-10	9.12162e-10	0.685518	0.0778808	3.33285e-19	2.21328e-18	-0.215467	0.107163	0.0399048	0.0610538
YCR010C	ADY2	0.991425	1.7591	0.457061	2.79207e-06	4.73769e-06	0.302039	0.348148	0.228733	0.278298	0.814341	0.538942	0.0166989	0.027828
YCR011C	ADP1	85.1644	1.29581	0.0760211	5.54367e-66	7.08789e-65	0.143823	0.0774208	0.052457	0.0729777	1.12669	0.108858	1.55624e-26	3.1278e-25
YCR012W	PGK1	1576.94	-0.627557	0.0751389	4.57179e-17	1.30771e-16	-0.0100931	0.0716042	0.881862	0.903487	-0.600002	0.105127	5.7555e-09	2.76618e-08
YCR013C	YCR013C
YCR014C	POL4	35.5636	-0.563628	0.101761	2.22626e-08	4.27061e-08	0.0827002	0.102283	0.39065	0.449142	-0.620998	0.143513	7.03403e-06	2.14498e-05
YCR015C	CTO1	12.5259	-0.0688269	0.118454	0.5429	0.577627	-0.262011	0.124948	0.0271501	0.0397293	0.188024	0.167961	0.236485	0.296221
YCR016W	YCR016W	26.1993	-0.561048	0.114194	6.54759e-07	1.15e-06	0.0656818	0.116803	0.549496	0.607549	-0.592734	0.162639	0.000124654	0.000311254
YCR017C	CWH43	75.8464	0.278218	0.0540329	2.43185e-07	4.37403e-07	0.0166443	0.0537581	0.742073	0.783945	0.255459	0.0775144	0.000852317	0.00183912
YCR018C	SRD1
YCR019W	MAK32	25.7282	-0.489174	0.103607	1.84842e-06	3.17916e-06	-0.580644	0.107239	2.30261e-08	6.87597e-08	0.101439	0.145142	0.467072	0.530228
YCR020C	PET18	17.9175	0.256545	0.121479	0.0295818	0.0370978	-0.256382	0.124247	0.0296654	0.0431363	0.490695	0.168789	0.00208265	0.00414499
YCR021C	HSP30	5.75213	-0.740857	0.242405	0.00118507	0.00167057	0.47558	0.237212	0.0195264	0.0294004	-1.12304	0.36311	9.83066e-05	0.000249815
YCR022C	YCR022C
YCR023C	YCR023C	38.6016	0.855278	0.0905126	1.61412e-21	5.51837e-21	0.0168593	0.0886746	0.841125	0.868121	0.807569	0.128717	7.42322e-11	4.61213e-10
YCR024C	SLM5	15.94	0.543821	0.109501	5.08611e-07	8.98965e-07	0.836678	0.114432	2.89624e-14	1.36478e-13	-0.291058	0.15294	0.0466362	0.0702788
YCR025C	YCR025C
YCR026C	NPP1	38.6517	1.31941	0.0731716	1.48236e-73	2.3409e-72	0.82626	0.0773075	1.37127e-27	1.48186e-26	0.468214	0.1048	4.96226e-06	1.54517e-05
YCR027C	RHB1	20.1744	-0.993302	0.110475	8.54908e-20	2.72114e-19	-0.740404	0.116138	3.37588e-11	1.2579e-10	-0.216065	0.154664	0.143007	0.190646
YCR028C	FEN2	12.2162	-0.54179	0.132772	3.3272e-05	5.27777e-05	-0.145926	0.136643	0.251077	0.302983	-0.348972	0.184945	0.0433317	0.065766
YCR030C	SYP1	72.8332	-0.0120896	0.0604401	0.832093	0.849545	-0.430494	0.0648244	1.89499e-11	7.182e-11	0.413037	0.090105	3.16069e-06	1.02198e-05
YCR031C	RPS14A
YCR032W	BPH1	19.8557	2.0858	0.114458	2.377e-76	4.14881e-75	1.00403	0.118302	8.66709e-19	5.59459e-18	0.998905	0.163331	7.01134e-11	4.37673e-10
YCR033W	SNT1	33.652	0.816505	0.0712162	1.00866e-30	4.69469e-30	0.385647	0.0745501	1.54378e-07	4.26408e-07	0.412533	0.10211	3.86349e-05	0.000104804
YCR034W	ELO2	67.3628	-0.0835138	0.0855823	0.30248	0.335344	0.491191	0.0870686	8.60965e-09	2.68249e-08	-0.567578	0.120818	1.39757e-06	4.74744e-06
YCR035C	RRP43	37.9461	0.278026	0.0763751	0.000249254	0.000371813	0.619334	0.081068	7.18117e-15	3.52482e-14	-0.339637	0.109791	0.00155871	0.00318709
YCR036W	RBK1	59.1234	0.940307	0.083331	6.27112e-30	2.82706e-29	0.865223	0.0856225	4.91242e-25	4.57286e-24	0.0622194	0.116772	0.584811	0.643643
YCR037C	PHO87	29.9976	-0.560881	0.0763046	1.45534e-13	3.56512e-13	-0.217189	0.0809509	0.00599482	0.00969771	-0.327741	0.109719	0.00228441	0.0045136
YCR038C	BUD5	13.6126	0.48284	0.129449	0.000150256	0.000227723	0.163719	0.13235	0.185064	0.229427	0.28048	0.179225	0.0963986	0.135047
YCR039C	MATALPHA2
YCR040W	MATALPHA1
YCR041W	YCR041W
YCR042C	TAF2	34.0258	-0.0112322	0.0791606	0.881614	0.895453	-0.124913	0.0870958	0.130043	0.167072	0.114134	0.117538	0.319546	0.382303
YCR043C	YCR043C	60.5294	0.436039	0.0672221	7.32316e-11	1.57826e-10	0.919367	0.0706488	6.92937e-40	1.34187e-38	-0.477908	0.0962822	4.57581e-07	1.66868e-06
YCR044C	PER1	35.92	-1.15874	0.0847702	3.52456e-43	2.39761e-42	-0.924697	0.0876204	3.19106e-27	3.35948e-26	-0.214063	0.118942	0.0646587	0.0942526
YCR045C	RRT12	0.683522	1.90205	0.618837	3.24631e-05	5.15562e-05	0.19722	0.402857	0.441155	0.500271	0.807704	0.659992	0.0327251	0.0509955
YCR046C	IMG1	34.2632	0.0518206	0.079083	0.48865	0.524748	0.544493	0.0832546	2.66423e-11	1.00045e-10	-0.481839	0.114486	1.64539e-05	4.75774e-05
YCR047C	BUD23	30.827	-0.179976	0.099746	0.0611418	0.0740512	0.119004	0.103466	0.222094	0.270903	-0.29281	0.139911	0.0299718	0.0471621
YCR048W	ARE1	52.8044	0.889852	0.0772659	4.8205e-31	2.2615e-30	0.563535	0.0804988	1.03721e-12	4.32322e-12	0.306148	0.109975	0.00443316	0.008239
YCR049C	YCR049C
YCR050C	YCR050C
YCR051W	YCR051W	50.3639	0.587008	0.079598	1.1781e-13	2.89936e-13	0.99423	0.0843615	1.97963e-33	2.88569e-32	-0.401027	0.113652	0.000303206	0.000708103
YCR052W	RSC6	46.6913	0.225749	0.0668985	0.000684374	0.000982226	0.154389	0.0706078	0.0238408	0.0352956	0.0662491	0.095618	0.480469	0.543227
YCR053W	THR4	233.527	-0.175629	0.0867377	0.0365759	0.045482	0.0190408	0.0823179	0.807348	0.839674	-0.190651	0.118852	0.0998253	0.139061
YCR054C	CTR86	21.8251	-0.327155	0.105256	0.00163858	0.00228918	-0.0655671	0.108846	0.522364	0.581062	-0.240603	0.149356	0.0937856	0.131961
YCR057C	PWP2	39.3319	-0.757667	0.115461	2.958e-11	6.5071e-11	-0.16522	0.11878	0.139063	0.1775	-0.543928	0.162295	0.000420555	0.000960183
YCR059C	YIH1	19.1803	0.135522	0.10859	0.190495	0.217697	0.234308	0.113898	0.030979	0.0449356	-0.0989858	0.152344	0.497517	0.559641
YCR060W	TAH1	57.111	0.273588	0.0668885	3.99215e-05	6.30427e-05	0.482848	0.070061	2.91019e-12	1.17158e-11	-0.210193	0.0958643	0.0258159	0.0414084
YCR061W	YCR061W	11.8072	0.801584	0.144006	1.33073e-08	2.57883e-08	0.340804	0.143163	0.0115218	0.0179491	0.396311	0.195462	0.0286677	0.0453791
YCR063W	BUD31	1.97922	-0.0269046	0.253455	0.908821	0.919215	0.100154	0.248193	0.63095	0.683926	-0.112136	0.324064	0.66716	0.717897
YCR064C	YCR064C
YCR065W	HCM1	21.5868	0.696497	0.116605	1.42604e-09	2.89463e-09	0.0830605	0.116351	0.447	0.506034	0.567267	0.163129	0.000242528	0.000576031
YCR066W	RAD18	17.0888	-0.274131	0.122104	0.0210716	0.0268185	-0.427441	0.125065	0.000367726	0.000704388	0.157596	0.168551	0.323654	0.386346
YCR067C	SED4	50.1321	0.252593	0.063665	6.78466e-05	0.000105261	-0.23247	0.0666662	0.000415183	0.000787615	0.477779	0.091571	1.11706e-07	4.46656e-07
YCR068W	ATG15	1.14951	0.878573	0.341139	0.00372498	0.00505751	-0.240846	0.310258	0.311516	0.368048	0.884609	0.482317	0.00573728	0.0104526
YCR069W	CPR4	55.3113	0.606389	0.0784388	7.47202e-15	1.95015e-14	-0.0765394	0.0790769	0.304288	0.360552	0.668287	0.110948	6.4069e-10	3.54854e-09
YCR071C	IMG2	39.0612	-1.40051	0.0781129	6.98369e-73	1.08667e-71	-0.31385	0.0792364	5.69835e-05	0.000119413	-1.05654	0.112205	3.34703e-22	5.04527e-21
YCR072C	RSA4	30.6613	-1.45613	0.11517	9.78527e-38	5.65585e-37	-0.653965	0.119166	1.12509e-08	3.46072e-08	-0.728251	0.162865	2.38569e-06	7.84123e-06
YCR073C	SSK22	17.599	1.41424	0.128482	3.31472e-29	1.46933e-28	0.951786	0.136912	2.00946e-13	8.87778e-13	0.395355	0.177982	0.0183289	0.0303536
YCR075C	ERS1	67.0079	1.22731	0.0920378	2.66228e-41	1.70399e-40	0.221107	0.0922089	0.0132438	0.0204635	0.967787	0.130716	1.31141e-14	1.19354e-13
YCR076C	FUB1	29.4733	0.981598	0.0856434	7.47141e-31	3.48666e-30	0.179946	0.0891507	0.0356338	0.05117	0.768793	0.122584	9.22434e-11	5.67142e-10
YCR077C	PAT1	33.0968	-1.21398	0.0882094	8.21688e-44	5.69174e-43	-0.557828	0.090008	2.3637e-10	8.22954e-10	-0.618475	0.124462	2.98874e-07	1.12311e-06
YCR079W	PTC6	12.6858	0.194521	0.129239	0.116114	0.13682	-0.0826245	0.126876	0.486237	0.545103	0.264584	0.176045	0.110415	0.152054
YCR081W	SRB8	7.95167	-5.63884	0.203544	8.92198e-171	8.93208e-169	-5.43075	0.213707	5.41166e-145	1.43571e-142	-0.167865	0.259154	1	1
YCR082W	AHC2	68.0114	1.24818	0.0740107	1.4049e-64	1.74169e-63	0.791665	0.0769894	1.21489e-25	1.16148e-24	0.432938	0.105146	2.58569e-05	7.22089e-05
YCR083W	TRX3	33.8099	-0.400235	0.0917507	1.09916e-05	1.79616e-05	-0.531122	0.0936149	6.28936e-09	1.97932e-08	0.13609	0.128474	0.274597	0.336337
YCR084C	TUP1	48.8801	-0.13308	0.0777839	0.0737759	0.0886246	0.239702	0.0784092	0.00183977	0.00322253	-0.368287	0.108145	0.000499105	0.00111741
YCR085W	YCR085W
YCR086W	CSM1	23.2697	-0.176107	0.0823684	0.0277548	0.0349305	-0.23089	0.0866991	0.00626229	0.010115	0.056975	0.116798	0.617379	0.672099
YCR087W	YCR087W
YCR088W	ABP1	203.304	0.789601	0.0501978	5.08367e-56	5.00444e-55	0.568616	0.0510984	3.73043e-29	4.38884e-28	0.214213	0.0711767	0.00237615	0.00467477
YCR089W	FIG2	13.557	0.471852	0.119515	6.27784e-05	9.75694e-05	-0.791792	0.126502	5.41926e-11	1.97762e-10	1.24531	0.178293	5.94679e-14	5.11404e-13
YCR090C	YCR090C	57.0962	-0.876699	0.0655552	3.94972e-41	2.50385e-40	-0.392838	0.0683428	5.97457e-09	1.88361e-08	-0.467143	0.0939742	4.33984e-07	1.58918e-06
YCR091W	KIN82	9.24344	-0.409873	0.166259	0.0108572	0.0142068	-1.06692	0.180391	1.0145e-10	3.64946e-10	0.602178	0.229674	0.00345107	0.00659157
YCR092C	MSH3	18.5652	-0.101613	0.112341	0.34225	0.376368	-0.565585	0.116862	5.09669e-07	1.3381e-06	0.448216	0.15844	0.00294488	0.00570275
YCR093W	CDC39	60.2263	-0.469596	0.0591329	1.62103e-15	4.35062e-15	-0.278651	0.0614873	4.76396e-06	1.12796e-05	-0.184041	0.0846918	0.0277941	0.0441279
YCR094W	CDC50	22.9877	-0.354968	0.101183	0.000392526	0.000576298	0.27735	0.105084	0.00631649	0.0101932	-0.610585	0.144022	9.89813e-06	2.96051e-05
YCR095C	OCA4	18.0626	-0.26332	0.112308	0.0163217	0.0210099	-0.27465	0.11505	0.0127502	0.0197411	0.020531	0.15555	0.890146	0.910918
YCR096C	HMRA2
YCR098C	GIT1	2.59479	0.99603	0.25645	3.24462e-05	5.15448e-05	0.207923	0.247671	0.318235	0.374955	0.5601	0.337716	0.0362057	0.0559428
YCR099C	YCR099C
YCR100C	EMA35
YCR101C	YCR101C
YCR102C	YCR102C	3.52633	-0.363728	0.224784	0.0850688	0.101592	0.163272	0.217039	0.388327	0.446858	-0.448653	0.294945	0.070368	0.101792
YCR104W	PAU3
YCR105W	ADH7	6.87021	-1.06384	0.179353	8.48582e-10	1.73845e-09	-1.40961	0.198246	1.24621e-14	6.04422e-14	0.298435	0.239391	0.163069	0.213958
YCR106W	RDS1	2.723	4.76549	0.285671	4.92328e-64	6.01862e-63	3.82173	0.295501	1.39371e-40	2.76966e-39	0.62961	0.356595	0.0524263	0.0780511
YCR107W	AAD3	20.7008	0.435326	0.118913	0.000206027	0.000308634	-0.384328	0.120644	0.00092586	0.00167953	0.787553	0.168895	6.5756e-07	2.34005e-06
YDL001W	RMD1	23.4941	0.751379	0.0979164	9.46978e-15	2.46186e-14	0.355101	0.10071	0.000293562	0.000569313	0.365879	0.137894	0.00582576	0.0105861
YDL002C	NHP10	26.9738	-0.0878465	0.0892441	0.298914	0.331676	-0.0329789	0.0894153	0.696952	0.74392	-0.0536359	0.126012	0.660767	0.711884
YDL003W	MCD1	48.1738	0.403966	0.0847102	1.58086e-06	2.73048e-06	0.0706967	0.0852846	0.379431	0.437945	0.31576	0.119131	0.0064185	0.0115721
YDL004W	ATP16	137.713	-0.10114	0.0656881	0.103632	0.122711	0.527086	0.0648804	2.09308e-16	1.16049e-15	-0.62423	0.0908278	3.09165e-12	2.20924e-11
YDL005C	MED2	38.2837	0.882817	0.074649	1.28629e-32	6.34889e-32	0.427497	0.0788232	3.55307e-08	1.04043e-07	0.433541	0.1074	3.71638e-05	0.000101072
YDL006W	PTC1	49.4641	-0.0775013	0.085126	0.336023	0.370288	-0.121186	0.0879712	0.14547	0.184922	0.0437074	0.12014	0.708763	0.754705
YDL007W	RPT2	132.848	-0.337842	0.0546034	5.49724e-10	1.14028e-09	-0.232523	0.0560696	2.91377e-05	6.31814e-05	-0.101393	0.0777791	0.187216	0.240817
YDL008W	APC11	17.6235	1.30549	0.103433	2.26091e-37	1.29272e-36	1.72768	0.112487	4.01117e-55	1.35562e-53	-0.392243	0.14716	0.00553707	0.0101309
YDL009C	YDL009C
YDL010W	GRX6	51.2169	0.324485	0.095508	0.000601183	0.000867993	0.274026	0.0963751	0.00345963	0.00579994	0.04076	0.132841	0.751108	0.791064
YDL011C	YDL011C
YDL012C	YDL012C	91.1495	-0.117237	0.0538479	0.0242222	0.0306226	0.122551	0.055906	0.0234405	0.0347611	-0.239523	0.0757618	0.00141029	0.00291168
YDL013W	SLX5	20.6338	0.155037	0.108207	0.133928	0.156836	-0.442133	0.110581	3.65227e-05	7.81724e-05	0.581746	0.151574	5.87477e-05	0.000155159
YDL014W	NOP1	148.684	-0.834125	0.100506	5.1399e-17	1.46311e-16	0.0996862	0.0998452	0.289187	0.344196	-0.90498	0.142612	3.45844e-11	2.23514e-10
YDL015C	TSC13	118.274	1.16305	0.043041	1.85118e-161	1.66481e-159	0.971084	0.0455164	2.6211e-102	3.39209e-100	0.186858	0.0622077	0.00249747	0.00489168
YDL016C	YDL016C
YDL017W	CDC7	12.852	0.0325663	0.12596	0.787189	0.808053	-0.125834	0.132961	0.309845	0.366237	0.15624	0.179817	0.354421	0.418181
YDL018C	ERP3	47.7162	0.51275	0.077715	3.23628e-11	7.10456e-11	0.56722	0.0800444	5.53192e-13	2.35951e-12	-0.0612888	0.109868	0.568618	0.629084
YDL019C	OSH2	50.4391	0.348463	0.0728926	1.55488e-06	2.68735e-06	-0.47039	0.0740914	1.18437e-10	4.22331e-10	0.807118	0.103823	1.55048e-15	1.49579e-14
YDL020C	RPN4	59.8862	-0.0842002	0.0855103	0.298103	0.330907	-0.472631	0.0872814	3.29685e-08	9.69146e-08	0.378809	0.120435	0.00121977	0.00254507
YDL021W	GPM2	30.0622	0.739698	0.115666	9.20783e-11	1.97641e-10	-1.11671	0.119885	2.75815e-22	2.20071e-21	1.85877	0.167477	2.6217e-30	7.36018e-29
YDL022W	GPD1	183.524	1.84216	0.090886	4.05865e-93	1.04035e-91	0.27488	0.0892339	0.00162461	0.00286385	1.53797	0.129412	2.19404e-34	8.25645e-33
YDL023C	YDL023C
YDL024C	DIA3	3.02484	2.47717	0.309738	4.34783e-18	1.29459e-17	-1.59786	0.3374	1.91137e-08	5.75581e-08	4.16489	0.433731	7.64523e-23	1.21454e-21
YDL025C	RTK1	31.2146	1.14585	0.0874668	7.72013e-40	4.72468e-39	0.265894	0.088419	0.00208997	0.0036299	0.844538	0.124262	1.95353e-12	1.43651e-11
YDL026W	YDL026W
YDL027C	MRX9	43.7847	1.65077	0.0942298	3.79158e-70	5.49675e-69	0.780624	0.0948124	2.76361e-17	1.6293e-16	0.819099	0.132276	1.17092e-10	7.07621e-10
YDL028C	MPS1	26.927	0.279108	0.0849521	0.000917754	0.00130378	0.159166	0.0891127	0.0614374	0.0844964	0.109571	0.120368	0.349817	0.413392
YDL029W	ARP2	140.048	0.6583	0.0448622	6.2353e-49	5.00522e-48	0.561296	0.0464862	6.01836e-34	8.91996e-33	0.0928435	0.0642668	0.1451	0.193055
YDL030W	PRP9	17.9651	0.267723	0.100332	0.00664183	0.00883247	-0.16374	0.105901	0.102366	0.134778	0.417379	0.142407	0.00227145	0.00449043
YDL031W	DBP10	32.3418	0.00129951	0.0986767	0.989025	0.989958	0.308382	0.106452	0.00277297	0.00472189	-0.300073	0.14443	0.0308918	0.0484516
YDL032W	YDL032W
YDL033C	SLM3	15.7237	-1.55521	0.11442	2.41351e-43	1.64814e-42	-1.32537	0.120457	4.40671e-30	5.50165e-29	-0.20329	0.157815	0.177002	0.229458
YDL034W	YDL034W
YDL035C	GPR1	23.956	1.57871	0.108102	1.30692e-49	1.06685e-48	1.4864	0.114816	2.7416e-40	5.34813e-39	0.0815369	0.150454	0.57258	0.632059
YDL036C	PUS9	17.2261	-1.19152	0.105611	3.28096e-30	1.49817e-29	-0.732242	0.110718	7.25532e-12	2.84529e-11	-0.412394	0.148545	0.00380409	0.00717034
YDL037C	BSC1	16.2788	-7.27799	0.34339	5.58338e-102	1.73248e-100	-3.90175	0.358097	4.96901e-30	6.16018e-29	-3.04959	0.519837	1.49393e-09	7.82506e-09
YDL039C	PRM7
YDL040C	NAT1	78.3736	0.471775	0.055014	7.98305e-18	2.35061e-17	-0.109542	0.0587395	0.0510917	0.0712463	0.575097	0.0793366	2.00206e-13	1.64442e-12
YDL041W	YDL041W
YDL042C	SIR2	17.3337	0.897805	0.102489	8.4563e-19	2.58612e-18	-0.226441	0.108632	0.029263	0.0425723	1.09637	0.151768	1.9929e-14	1.78923e-13
YDL043C	PRP11	10.5778	-0.137022	0.142918	0.314283	0.34763	-0.482001	0.146705	0.000500929	0.000940861	0.331236	0.196796	0.0691719	0.100171
YDL044C	MTF2	10.3887	-0.19922	0.132837	0.117341	0.138143	-0.294142	0.135766	0.0217657	0.0325138	0.0992349	0.181836	0.56124	0.622219
YDL045C	FAD1	30.2934	1.10065	0.089789	4.06898e-35	2.20306e-34	0.766778	0.0932917	3.35619e-17	1.96339e-16	0.305605	0.126455	0.0126073	0.0214542
YDL046W	NPC2	156.574	0.687015	0.052433	2.00495e-39	1.21719e-38	0.0598686	0.053481	0.229746	0.279339	0.614793	0.0743534	5.70236e-17	6.05135e-16
YDL047W	SIT4	28.2927	0.0366448	0.0835537	0.644669	0.67561	0.033256	0.0871675	0.687082	0.73516	0.00302732	0.122318	0.979708	0.985279
YDL048C	STP4	8.15286	-0.0749012	0.162399	0.628349	0.660201	-0.499342	0.166681	0.00124273	0.00221346	0.400343	0.223318	0.0480558	0.072213
YDL049C	KNH1	9.62153	1.07089	0.137891	2.29826e-15	6.12793e-15	0.766381	0.142694	1.24e-08	3.79219e-08	0.246617	0.187967	0.16015	0.210492
YDL050C	YDL050C
YDL051W	LHP1	95.0418	-0.55749	0.0787614	1.08011e-12	2.54602e-12	0.0240703	0.0779953	0.744729	0.785593	-0.565779	0.111833	2.31984e-07	8.85546e-07
YDL052C	SLC1	45.907	-0.297769	0.0633252	2.36218e-06	4.02497e-06	-0.0620046	0.0659149	0.316323	0.373063	-0.22618	0.0908105	0.0114301	0.019654
YDL053C	PBP4	54.366	0.0255133	0.0592128	0.646279	0.67703	-0.120049	0.0653959	0.0549445	0.0761388	0.148436	0.0883093	0.0878867	0.124786
YDL054C	MCH1	28.799	0.369907	0.099537	0.000175069	0.000264121	0.339902	0.101425	0.000572976	0.00106937	0.0188161	0.139036	0.888466	0.909726
YDL055C	PSA1	902.319	0.381007	0.0390888	1.65536e-22	5.88695e-22	0.00497466	0.0367272	0.883853	0.905352	0.372221	0.0553278	1.28836e-11	8.62047e-11
YDL056W	MBP1	28.1679	1.25532	0.095581	3.53378e-40	2.1828e-39	1.26746	0.101717	1.60784e-37	2.77889e-36	-0.0179887	0.134515	0.89005	0.910918
YDL057W	YDL057W	19.9549	1.72631	0.138032	1.84369e-37	1.05872e-36	0.916612	0.141456	6.2839e-12	2.47347e-11	0.706718	0.190165	6.07877e-05	0.000159911
YDL058W	USO1	47.7746	0.233741	0.0973197	0.014108	0.0182846	-0.554035	0.0983586	7.35549e-09	2.30527e-08	0.7701	0.137051	4.84355e-09	2.35131e-08
YDL059C	RAD59	229.428	0.258017	0.184695	0.141008	0.164509	0.657832	0.182867	8.10386e-05	0.000166922	-0.375732	0.241984	0.0817233	0.116597
YDL060W	TSR1	54.3846	-0.771833	0.0941845	1.37576e-16	3.83796e-16	-0.0719018	0.0955361	0.424877	0.483776	-0.665045	0.133984	2.80025e-07	1.05526e-06
YDL061C	RPS29B	665.03	-1.48932	0.0839419	1.40394e-71	2.10433e-70	0.0160618	0.0799377	0.832282	0.860836	-1.49063	0.119855	6.90002e-37	3.05096e-35
YDL062W	YDL062W
YDL063C	SYO1	19.4012	-0.573448	0.131149	8.79461e-06	1.4483e-05	-0.147522	0.135341	0.241765	0.292544	-0.377319	0.183176	0.0286354	0.0453415
YDL064W	UBC9	90.9501	-0.359764	0.0530168	1.02123e-11	2.29992e-11	-0.172332	0.0550139	0.00152913	0.00270542	-0.182762	0.0758437	0.0148841	0.0249921
YDL065C	PEX19	46.7753	0.625868	0.0606023	3.62325e-25	1.39615e-24	0.587563	0.0650758	6.53069e-20	4.58358e-19	0.0312159	0.0880407	0.719278	0.763909
YDL066W	IDP1	147.333	-1.27872	0.0813272	1.63058e-56	1.62936e-55	-0.737694	0.0817484	3.48392e-20	2.47134e-19	-0.51182	0.113493	3.9199e-06	1.23951e-05
YDL067C	COX9	152.726	-0.731553	0.0688314	1.298e-26	5.2735e-26	0.395892	0.0691707	6.86119e-09	2.15544e-08	-1.11735	0.098486	5.61945e-31	1.63828e-29
YDL068W	YDL068W
YDL069C	CBS1	13.2155	-0.160081	0.13485	0.213321	0.242269	0.0304546	0.132273	0.805493	0.838522	-0.17992	0.184262	0.298364	0.361201
YDL070W	BDF2	66.9942	0.582351	0.064841	1.93076e-19	6.05832e-19	-0.12533	0.067935	0.0539124	0.0748847	0.697119	0.0928103	2.08952e-14	1.86336e-13
YDL071C	YDL071C
YDL072C	YET3	210.105	-0.258095	0.0605617	1.89779e-05	3.06254e-05	-0.973923	0.0614712	7.45811e-58	2.76733e-56	0.707686	0.0856988	4.91631e-17	5.23814e-16
YDL073W	AHK1	33.1991	0.479539	0.0841492	9.65999e-09	1.89066e-08	0.0508611	0.0860841	0.531846	0.590618	0.408343	0.120164	0.000473342	0.00106696
YDL074C	BRE1	60.0466	0.430966	0.0581263	1.02513e-13	2.52993e-13	0.389362	0.0612321	1.36031e-10	4.83443e-10	0.0366369	0.0837786	0.658011	0.709348
YDL075W	RPL31A	1258.14	-1.40478	0.0913481	2.2537e-54	2.12778e-53	-6.71694e-05	0.0867193	0.999349	0.999349	-1.38265	0.130739	1.14958e-27	2.48966e-26
YDL076C	RXT3	45.9652	1.44103	0.0800259	1.47555e-73	2.3371e-72	0.636001	0.0818281	2.3713e-15	1.20288e-14	0.769152	0.113649	3.27708e-12	2.33399e-11
YDL077C	VAM6	18.5631	1.15049	0.116928	1.7528e-23	6.44517e-23	0.933357	0.122279	1.42123e-15	7.34281e-15	0.181819	0.161486	0.236724	0.29638
YDL078C	MDH3	136.658	1.65027	0.0673278	4.14651e-134	2.31593e-132	0.844096	0.067798	1.4908e-36	2.44898e-35	0.780275	0.0948506	4.76669e-17	5.08895e-16
YDL079C	MRK1	10.2457	0.576066	0.177185	0.000796436	0.00113569	-1.45411	0.191559	3.30923e-16	1.79721e-15	2.01259	0.263609	3.37889e-16	3.39552e-15
YDL080C	THI3	18.4275	0.418418	0.10521	5.84368e-05	9.10084e-05	-0.0418077	0.105593	0.674923	0.725662	0.437947	0.148295	0.00199376	0.00399053
YDL081C	RPP1A	529.826	-1.87563	0.101593	6.13904e-78	1.12323e-76	-0.233684	0.0999537	0.0153206	0.0234742	-1.60767	0.14476	4.74624e-30	1.28488e-28
YDL082W	RPL13A	395.926	-1.46584	0.102873	3.52901e-47	2.72958e-46	0.0114313	0.0977602	0.901774	0.920156	-1.45254	0.147701	2.03885e-24	3.58217e-23
YDL083C	RPS16B	448.374	-1.34195	0.107439	1.04103e-36	5.87005e-36	0.0134798	0.102063	0.889015	0.909411	-1.32437	0.154538	2.70575e-19	3.41827e-18
YDL084W	SUB2	184.565	-0.0598486	0.0527135	0.219763	0.249211	-0.158372	0.0530696	0.00249792	0.00428515	0.0947313	0.0737629	0.194535	0.249505
YDL085W	NDE2	15.837	1.09562	0.155461	4.79909e-13	1.15013e-12	-1.44104	0.163899	1.56079e-20	1.13291e-19	2.54849	0.227294	3.61014e-31	1.07013e-29
YDL086W	YDL086W	169.688	-0.172614	0.0526168	0.000964462	0.00136903	-0.00412999	0.0505741	0.930854	0.945285	-0.165552	0.074415	0.0247538	0.0398858
YDL087C	LUC7	4.88051	2.21753	0.212311	7.8047e-28	3.29711e-27	2.20162	0.229319	1.12554e-23	9.7743e-23	0.00993165	0.267456	0.957045	0.965599
YDL088C	ASM4	31.9555	0.929728	0.0858427	1.00415e-27	4.22859e-27	0.443425	0.0888375	3.48104e-07	9.29095e-07	0.457381	0.121841	0.000110726	0.000278443
YDL089W	NUR1	24.4759	1.56707	0.114594	7.40208e-44	5.13404e-43	1.18059	0.119737	1.07285e-24	9.8317e-24	0.344138	0.157917	0.0221992	0.0361094
YDL090C	RAM1	27.5381	0.47906	0.0947821	3.44929e-07	6.16227e-07	0.02727	0.0948649	0.761486	0.80104	0.428383	0.134118	0.000927273	0.00198552
YDL091C	UBX3	29.7182	0.332467	0.0961232	0.000478426	0.000696632	-0.325656	0.098074	0.000656886	0.00121233	0.638698	0.136042	1.036e-06	3.59046e-06
YDL092W	SRP14	82.2801	-0.595031	0.0465432	1.42575e-37	8.23178e-37	-0.287681	0.0493981	4.64786e-09	1.48127e-08	-0.301343	0.0675803	6.97824e-06	2.13041e-05
YDL093W	PMT5	24.1566	0.295961	0.0957215	0.00175946	0.0024471	-0.546053	0.0985641	1.28853e-08	3.9338e-08	0.823198	0.136982	3.56259e-10	2.03917e-09
YDL094C	YDL094C
YDL095W	PMT1	84.2614	-0.0162296	0.051793	0.737487	0.762026	-0.0947645	0.0577892	0.0835193	0.111936	0.0784746	0.0781214	0.309747	0.372511
YDL096C	OPI6
YDL097C	RPN6	188.215	0.0888118	0.049063	0.0556576	0.067796	0.158299	0.0487391	0.00104415	0.00188444	-0.0676927	0.0677415	0.313395	0.3764
YDL098C	SNU23	17.6718	0.605708	0.111494	3.85118e-08	7.29017e-08	0.326569	0.115044	0.00321169	0.00541851	0.248361	0.156034	0.0951926	0.133516
YDL099W	BUG1	44.1398	0.0769962	0.0656165	0.210544	0.239269	-0.141546	0.0693244	0.0340615	0.0490182	0.220593	0.093391	0.0163594	0.0273052
YDL100C	GET3	178.172	-0.04717	0.0433938	0.233271	0.263348	0.048429	0.0447269	0.240783	0.291422	-0.102067	0.0614756	0.0945181	0.132781
YDL101C	DUN1	32.981	0.182195	0.0812338	0.0213556	0.0271603	-0.0191882	0.0795778	0.799325	0.833046	0.197265	0.113441	0.0748636	0.107591
YDL102W	POL3	21.0803	0.118596	0.0884737	0.158498	0.183462	0.0532328	0.0907173	0.534584	0.593162	0.0617751	0.125167	0.611465	0.667271
YDL103C	QRI1	69.6088	-0.263934	0.0552285	1.64797e-06	2.84269e-06	-0.580847	0.057849	3.91036e-24	3.47544e-23	0.316206	0.0794052	5.6551e-05	0.000149507
YDL104C	QRI7	25.2647	-0.496698	0.115647	1.36401e-05	2.21668e-05	-0.568784	0.118697	6.3923e-07	1.66262e-06	0.0851049	0.160353	0.57756	0.636719
YDL105W	NSE4	10.0253	-0.559373	0.126507	7.13793e-06	1.18356e-05	-0.472406	0.133446	0.000205969	0.000406423	-0.0579314	0.177106	0.728588	0.772668
YDL106C	PHO2	15.4455	-0.578428	0.117081	5.57764e-07	9.83548e-07	-0.373884	0.118886	0.00108851	0.00195718	-0.175767	0.162004	0.254709	0.315399
YDL107W	MSS2	11.6285	0.561353	0.145214	7.98378e-05	0.000123468	0.237139	0.146276	0.0814533	0.109471	0.274721	0.197618	0.134705	0.180994
YDL108W	KIN28	28.2171	0.538118	0.0841978	1.24257e-10	2.65422e-10	0.0976839	0.0877696	0.23804	0.288563	0.41809	0.119986	0.000333057	0.000773053
YDL109C	YDL109C	0.502775	2.53014	0.604905	1.16472e-07	2.1384e-07	0.676738	0.483909	0.0231683	0.0343863	0.676486	0.590379	0.0582965	0.0861379
YDL110C	TMA17	239.932	-0.0320713	0.0804383	0.674875	0.70436	-0.608083	0.082799	7.13436e-14	3.27465e-13	0.563679	0.11595	5.85991e-07	2.09995e-06
YDL111C	RRP42	45.1619	-0.115744	0.0651189	0.0625668	0.0757252	0.584751	0.0684861	5.17542e-18	3.21555e-17	-0.695431	0.0930797	2.86373e-14	2.51156e-13
YDL112W	TRM3	28.9625	0.584411	0.0989626	2.51233e-09	5.05515e-09	0.556866	0.103943	3.45194e-08	1.01193e-07	0.011461	0.139988	0.932287	0.945292
YDL113C	ATG20	31.1989	0.802229	0.130637	4.21695e-10	8.8091e-10	-0.0417742	0.126387	0.724349	0.768372	0.790602	0.183551	3.4748e-06	1.11135e-05
YDL114W	YDL114W	1.59761	0.50841	0.350233	0.0982612	0.11656	0.30015	0.320856	0.21592	0.264101	0.0720332	0.396547	0.80332	0.836588
YDL115C	IWR1	20.7732	0.403958	0.0975645	2.9442e-05	4.68423e-05	0.0771374	0.100184	0.413926	0.472829	0.304459	0.138141	0.0220949	0.0359618
YDL116W	NUP84	54.0895	-0.345022	0.0641682	6.76521e-08	1.26129e-07	-0.529073	0.0671948	1.58477e-15	8.17181e-15	0.185798	0.0919923	0.0403523	0.0616497
YDL117W	CYK3	35.3084	-0.275175	0.077001	0.000321932	0.000475814	-0.508218	0.0806485	1.43528e-10	5.08722e-10	0.233742	0.109945	0.029651	0.0467543
YDL118W	YDL118W
YDL119C	HEM25	15.0325	0.536129	0.106154	3.31518e-07	5.92666e-07	-0.100433	0.107728	0.321545	0.378296	0.609776	0.149899	2.02081e-05	5.74313e-05
YDL120W	YFH1	77.6737	0.0331238	0.0477969	0.452077	0.487748	0.0841086	0.0523745	0.0887489	0.118525	-0.0497345	0.0704985	0.476082	0.539092
YDL121C	EXP1	53.7575	-0.581629	0.0783274	8.0802e-14	2.00176e-13	-0.16964	0.0826056	0.0329166	0.0474994	-0.39345	0.111891	0.000324769	0.000754806
YDL122W	UBP1	68.8393	0.110022	0.0575991	0.0457662	0.0562901	0.13373	0.0602377	0.0219177	0.0326948	-0.0238651	0.0811954	0.766127	0.804486
YDL123W	SNA4	4.69307	1.66638	0.198747	1.73772e-18	5.26577e-18	1.13221	0.212663	2.35898e-09	7.65084e-09	0.392632	0.256937	0.0808538	0.115574
YDL124W	YDL124W	272.411	1.60969	0.0992315	1.54223e-60	1.72275e-59	0.428079	0.097276	6.47209e-06	1.50618e-05	1.13242	0.140968	3.5341e-17	3.80364e-16
YDL125C	HNT1	327.496	0.685019	0.0625349	4.00888e-28	1.71403e-27	-0.029041	0.0604674	0.609985	0.665514	0.704106	0.0881362	4.49868e-16	4.48685e-15
YDL126C	CDC48	479.931	-0.261966	0.0412568	2.02367e-10	4.28645e-10	-0.618436	0.0418127	5.69382e-50	1.55729e-48	0.355636	0.0585091	9.26466e-10	4.98058e-09
YDL127W	PCL2	12.5783	-0.00266837	0.113038	0.980353	0.983413	-0.20785	0.121758	0.0705442	0.0958534	0.201309	0.163354	0.19471	0.249669
YDL128W	VCX1	37.8874	0.00860935	0.0717063	0.899442	0.911467	0.128134	0.0789737	0.0881505	0.117756	-0.119756	0.106806	0.253143	0.313606
YDL129W	YDL129W	1.89741	-1.36818	0.31845	1.72707e-06	2.97817e-06	-0.354631	0.292387	0.126223	0.162597	-0.631904	0.400301	0.03419	0.0531377
YDL130W	RPP1B	704.633	-1.29652	0.102795	2.61097e-37	1.48806e-36	0.456619	0.101183	3.55842e-06	8.53307e-06	-1.75352	0.146658	4.66641e-34	1.68836e-32
YDL131W	LYS21	678.733	-0.939086	0.0752532	3.89037e-36	2.15312e-35	-0.880491	0.0755041	1.71511e-32	2.4139e-31	-0.0494092	0.104647	0.63001	0.683047
YDL132W	CDC53	135.699	1.10348	0.062753	8.67704e-70	1.24434e-68	0.678763	0.0639532	6.66731e-27	6.84269e-26	0.40918	0.0887082	2.81614e-06	9.16154e-06
YDL133W	SRF1	25.1586	0.38685	0.108725	0.000318038	0.000470583	-0.203065	0.111551	0.0553375	0.0766634	0.566001	0.152855	0.00010267	0.000259783
YDL134C	PPH21	111.176	0.990604	0.0514045	3.38595e-83	6.90995e-82	0.606926	0.0532204	1.4058e-30	1.79308e-29	0.373659	0.0735134	2.7756e-07	1.04821e-06
YDL135C	RDI1	81.1757	0.0274997	0.0519028	0.568958	0.603416	0.261614	0.0558387	2.33903e-06	5.72194e-06	-0.229675	0.0771559	0.00260671	0.00509062
YDL136W	RPL35B
YDL137W	ARF2	507.678	0.295127	0.0396392	8.91448e-14	2.20411e-13	0.0556875	0.040968	0.141256	0.179867	0.234265	0.0561236	2.66266e-05	7.428e-05
YDL138W	RGT2	35.5397	0.538216	0.0910457	2.55407e-09	5.13694e-09	0.184271	0.093989	0.0407516	0.0579544	0.332167	0.12812	0.00740939	0.0132416
YDL139C	SCM3	12.0006	0.543111	0.124932	1.02325e-05	1.67572e-05	-0.222549	0.129118	0.0669867	0.0913236	0.726858	0.177847	1.24089e-05	3.66193e-05
YDL140C	RPO21	151.112	0.336153	0.0470361	7.99403e-13	1.89443e-12	0.310923	0.0483717	1.00855e-10	3.63051e-10	0.0228152	0.0671482	0.731965	0.775657
YDL141W	BPL1	35.7551	0.309531	0.0695288	7.75225e-06	1.28342e-05	-0.14035	0.0740682	0.0481664	0.0677368	0.442222	0.0999775	6.25735e-06	1.92361e-05
YDL142C	CRD1	28.2962	1.52111	0.110964	5.64997e-44	3.93422e-43	1.00058	0.115545	1.96961e-19	1.32961e-18	0.467657	0.15403	0.00147421	0.00302716
YDL143W	CCT4	146.76	0.628167	0.0479553	2.28025e-39	1.37645e-38	0.835832	0.0502095	3.59287e-63	1.602e-61	-0.208513	0.0689234	0.0023033	0.00454493
YDL144C	YDL144C	60.7718	1.16462	0.0582269	1.20131e-89	2.79568e-88	0.631979	0.0608815	9.65082e-26	9.27667e-25	0.516676	0.0836149	3.87855e-10	2.21048e-09
YDL145C	COP1	130.833	0.162713	0.0386981	2.53678e-05	4.05426e-05	-0.1677	0.0403497	2.99649e-05	6.48425e-05	0.328507	0.0557463	3.04867e-09	1.52462e-08
YDL146W	LDB17	18.122	0.367188	0.10913	0.000657526	0.000945226	-0.571714	0.111525	1.13905e-07	3.17928e-07	0.914467	0.156629	5.87775e-10	3.27255e-09
YDL147W	RPN5	160.941	0.122492	0.0472791	0.00817844	0.0108028	0.0513473	0.0483677	0.252121	0.304104	0.0671271	0.0666709	0.309742	0.372511
YDL148C	NOP14	28.6511	-0.340349	0.126245	0.00592034	0.00789477	-0.172003	0.129072	0.15437	0.195253	-0.143759	0.174168	0.381971	0.446206
YDL149W	ATG9	70.4414	0.785754	0.123841	1.18052e-10	2.5227e-10	-0.160156	0.122278	0.162665	0.204672	0.904338	0.175138	3.10386e-08	1.34004e-07
YDL150W	RPC53	48.8706	0.0315079	0.0773717	0.66793	0.697782	0.188821	0.0841202	0.0202879	0.0304692	-0.154174	0.113938	0.166201	0.216994
YDL151C	BUD30
YDL152W	YDL152W
YDL153C	SAS10	18.2599	-1.31119	0.144253	1.35039e-20	4.46429e-20	-0.570881	0.148065	4.2878e-05	9.09315e-05	-0.636733	0.200569	0.000578188	0.00128095
YDL154W	MSH5	4.62729	1.07194	0.193175	7.87707e-09	1.54742e-08	0.784549	0.201604	1.36053e-05	3.07059e-05	0.188996	0.251885	0.395561	0.459568
YDL155W	CLB3	30.5859	-0.506991	0.0792903	1.25939e-10	2.68907e-10	-0.798587	0.0839698	2.62531e-22	2.10104e-21	0.291353	0.113369	0.0084286	0.014848
YDL156W	CMR1	2.51512	0.594933	0.245089	0.00974623	0.0127846	0.33431	0.234703	0.0965528	0.127917	0.156656	0.304606	0.531244	0.593178
YDL157C	YDL157C	74.5417	-0.359412	0.0584091	6.7111e-10	1.38341e-09	-0.469263	0.0602507	3.7383e-15	1.87126e-14	0.112211	0.0832465	0.172225	0.224142
YDL158C	YDL158C
YDL159W	STE7	27.6586	-0.283544	0.0952851	0.00258273	0.00354566	-0.704718	0.0982403	1.6351e-13	7.28452e-13	0.414575	0.133773	0.00132697	0.00275104
YDL160C	DHH1	5.14463	-1.44804	0.19324	5.41319e-15	1.42261e-14	-1.2007	0.216389	5.11358e-10	1.74039e-09	-0.164506	0.252985	0.463318	0.527685
YDL161W	ENT1	55.161	-0.528914	0.0687731	1.11806e-14	2.8967e-14	-0.590568	0.0711447	3.83286e-17	2.22507e-16	0.067054	0.0977382	0.484486	0.54707
YDL162C	YDL162C
YDL163W	YDL163W
YDL164C	CDC9	29.0407	0.32469	0.0905378	0.000298507	0.000442796	0.034769	0.0906411	0.685382	0.734378	0.274302	0.127824	0.0266439	0.0425053
YDL165W	CDC36	41.5244	0.253798	0.0636873	6.3011e-05	9.79022e-05	0.192747	0.0676253	0.00371376	0.00618883	0.0566654	0.0918585	0.530815	0.592823
YDL166C	FAP7	79.5298	-1.10331	0.0698993	1.06653e-56	1.08203e-55	-0.591766	0.0726042	1.33675e-16	7.53748e-16	-0.489863	0.0997297	5.7557e-07	2.06769e-06
YDL167C	NRP1	13.183	0.0425452	0.129098	0.730608	0.755674	0.245449	0.139517	0.0602167	0.0830111	-0.197841	0.18496	0.254385	0.315072
YDL168W	SFA1	61.8106	-0.0687051	0.0549738	0.178798	0.205569	-0.0108807	0.0539418	0.830487	0.859314	-0.0592765	0.0777626	0.441166	0.505469
YDL169C	UGX2	34.3789	1.4667	0.141043	1.91928e-26	7.75607e-26	-0.467576	0.137683	0.000354397	0.000681069	1.93901	0.201767	1.72773e-23	2.83818e-22
YDL170W	UGA3	35.4536	0.836564	0.119255	1.11612e-12	2.62856e-12	0.263931	0.119646	0.020694	0.0310088	0.522026	0.165021	0.000832283	0.00179955
YDL171C	GLT1	124.138	-0.376294	0.063348	2.48877e-09	5.00963e-09	-0.426029	0.0638404	1.53709e-11	5.86747e-11	0.0531981	0.0891219	0.544478	0.605914
YDL172C	YDL172C
YDL173W	PAR32	44.9512	0.0607107	0.0689482	0.348177	0.382649	0.0914803	0.0727829	0.182588	0.226675	-0.0306397	0.098995	0.752503	0.791904
YDL174C	DLD1	212.365	0.25315	0.0719135	0.000397619	0.000583292	0.157911	0.0726029	0.0245241	0.0361759	0.089212	0.100404	0.365184	0.429286
YDL175C	AIR2	20.414	-0.491951	0.104861	2.13472e-06	3.65146e-06	-0.52405	0.108667	6.43762e-07	1.67359e-06	0.0452265	0.147034	0.748644	0.789408
YDL176W	YDL176W	22.4228	0.742075	0.107909	3.50707e-12	8.07311e-12	0.0882674	0.107875	0.384393	0.442907	0.61154	0.15142	2.26575e-05	6.38114e-05
YDL177C	YDL177C	34.8749	-0.00414369	0.0785605	0.955861	0.961478	-0.245199	0.0856976	0.00340472	0.00572054	0.237366	0.116785	0.0368995	0.0569213
YDL178W	DLD2	53.3439	-0.0370519	0.0566549	0.482928	0.518918	0.102297	0.0620505	0.08249	0.11078	-0.143665	0.0835344	0.0815154	0.116394
YDL179W	PCL9	21.9067	-0.0689449	0.110715	0.51395	0.549581	-0.053625	0.111885	0.610774	0.665592	-0.0131488	0.15621	0.9298	0.942975
YDL180W	YDL180W	32.0909	1.35626	0.108484	8.5521e-37	4.82739e-36	1.01325	0.111368	3.54678e-21	2.69616e-20	0.306007	0.149294	0.0325411	0.0507534
YDL181W	INH1	68.8883	-1.13869	0.109412	5.48258e-26	2.1807e-25	-1.27977	0.111691	2.75295e-32	3.8339e-31	0.136653	0.149603	0.340858	0.403974
YDL182W	LYS20	928.471	-0.887433	0.12897	2.6028e-12	6.02288e-12	-0.281233	0.126626	0.0194134	0.0292717	-0.546815	0.176258	0.000986076	0.00209957
YDL183C	YDL183C	31.992	-0.994621	0.126424	1.25378e-15	3.3838e-15	-0.937701	0.129742	2.9756e-14	1.40093e-13	-0.03312	0.171791	0.838352	0.866776
YDL184C	RPL41A
YDL185W	VMA1
YDL186W	YDL186W	0.897377	-0.150703	0.366248	0.634798	0.666054	-0.408823	0.356049	0.110175	0.143917	0.239832	0.426035	0.356832	0.420651
YDL187C	YDL187C
YDL188C	PPH22	39.9525	0.531018	0.0759668	2.09122e-12	4.85601e-12	0.211905	0.0785579	0.00577556	0.00937733	0.304846	0.107784	0.00382918	0.00721506
YDL189W	RBS1	37.7467	0.308187	0.0665944	3.37025e-06	5.70052e-06	-0.0254483	0.0686139	0.69496	0.742092	0.327661	0.0965254	0.000552844	0.00122942
YDL190C	UFD2	53.5061	0.394254	0.0647307	9.69331e-10	1.98047e-09	0.323432	0.0673806	1.20158e-06	3.03023e-06	0.0648872	0.0925899	0.476496	0.53931
YDL191W	RPL35A	567.271	-1.6136	0.0675286	1.47432e-127	7.17684e-126	-0.295169	0.0670487	8.49248e-06	1.95578e-05	-1.29918	0.096196	7.74401e-43	4.95057e-41
YDL192W	ARF1	508.502	-0.501006	0.0559419	2.65515e-19	8.30183e-19	0.160192	0.0563588	0.00388138	0.00645195	-0.65325	0.078958	6.2059e-17	6.55946e-16
YDL193W	NUS1	36.5437	0.994201	0.0742533	2.46668e-41	1.58453e-40	0.181981	0.0777091	0.0158407	0.0242082	0.787211	0.106809	3.63792e-14	3.17481e-13
YDL194W	SNF3	7.01492	0.227057	0.164101	0.146476	0.170364	0.00616064	0.162715	0.967089	0.975732	0.194683	0.222006	0.333622	0.396559
YDL195W	SEC31	97.0124	0.543207	0.0459909	2.58106e-32	1.26222e-31	0.165863	0.0476561	0.000454141	0.000857839	0.37174	0.0659309	1.26803e-08	5.78852e-08
YDL196W	YDL196W
YDL197C	ASF2	26.1884	1.86318	0.109422	7.94728e-67	1.03354e-65	1.07114	0.113354	9.57531e-23	7.9138e-22	0.725613	0.153169	6.34121e-07	2.25967e-06
YDL198C	GGC1	430.979	-0.997737	0.0946107	1.85086e-26	7.48528e-26	-0.320786	0.0934282	0.000441861	0.000835537	-0.64057	0.131644	4.90751e-07	1.77985e-06
YDL199C	YDL199C	10.5507	1.65168	0.172332	3.37699e-23	1.22728e-22	-0.0592111	0.159776	0.686725	0.735079	1.65863	0.249995	3.61239e-13	2.89537e-12
YDL200C	MGT1	31.1852	1.52323	0.0913481	1.23341e-63	1.47731e-62	0.74373	0.0938387	4.19301e-16	2.26266e-15	0.732383	0.129244	4.53645e-09	2.21235e-08
YDL201W	TRM8	21.4796	-0.326274	0.110319	0.00267819	0.00367196	-0.0610593	0.112533	0.564218	0.621753	-0.24314	0.155228	0.101831	0.141443
YDL202W	MRPL11	28.9967	-0.290546	0.0829396	0.000416138	0.00060844	0.0813456	0.0846628	0.308113	0.364596	-0.363772	0.117188	0.00147197	0.00302372
YDL203C	ACK1	26.2878	1.36059	0.105828	9.11987e-39	5.40067e-38	0.484851	0.108558	4.07049e-06	9.72007e-06	0.815175	0.150856	1.36978e-08	6.23869e-08
YDL204W	RTN2	26.3892	0.873792	0.168201	9.03216e-08	1.66985e-07	-2.03442	0.17377	1.67993e-33	2.46234e-32	2.90848	0.246783	4.67752e-34	1.68836e-32
YDL205C	HEM3	19.2054	0.25939	0.1116	0.0172363	0.0221336	0.556302	0.115197	5.56214e-07	1.45383e-06	-0.294021	0.155365	0.0476819	0.0717324
YDL206W	YDL206W	34.5806	0.425745	0.093297	4.21301e-06	7.08982e-06	0.0758011	0.0942453	0.393696	0.452056	0.328601	0.131152	0.00970287	0.0169353
YDL207W	GLE1	22.4137	0.527936	0.0845948	3.32092e-10	6.97853e-10	0.292947	0.0891801	0.000788572	0.00144182	0.218543	0.121051	0.0633099	0.092566
YDL208W	NHP2	146.698	-0.724273	0.0863054	2.8355e-17	8.16783e-17	0.260577	0.0869142	0.00216821	0.0037572	-0.964686	0.123264	6.45032e-16	6.34979e-15
YDL209C	CWC2	18.9464	-0.695786	0.0996508	1.79146e-12	4.16908e-12	-1.08663	0.109286	7.00624e-25	6.4765e-24	0.38052	0.142844	0.0056072	0.0102451
YDL210W	UGA4	11.6595	1.19651	0.210649	2.55492e-09	5.13694e-09	-0.0747074	0.197109	0.670394	0.721378	1.14723	0.311012	8.73093e-06	2.6277e-05
YDL211C	YDL211C	15.1105	-0.222383	0.116072	0.0474895	0.0582476	-0.292472	0.118456	0.00994575	0.0156408	0.075284	0.15999	0.621027	0.675032
YDL212W	SHR3	123.131	-0.249043	0.0458676	5.32642e-08	9.99011e-08	-0.0917608	0.0488858	0.0487813	0.0684746	-0.153055	0.0659012	0.0194495	0.0320096
YDL213C	NOP6	44.7595	-0.399384	0.0935747	1.68291e-05	2.72325e-05	-0.11976	0.096946	0.190542	0.235449	-0.259895	0.132071	0.0422883	0.0642928
YDL214C	PRR2	5.58813	3.09636	0.257777	1.87315e-35	1.02252e-34	0.286481	0.224656	0.14096	0.179533	2.59378	0.366613	7.7683e-15	7.23133e-14
YDL215C	GDH2	37.0256	0.26785	0.147647	0.0592514	0.0719094	-0.101865	0.14133	0.437486	0.496641	0.344292	0.197383	0.0597048	0.0878761
YDL216C	RRI1	15.045	0.837203	0.14127	1.48756e-09	3.01489e-09	0.0912271	0.138057	0.477448	0.536725	0.674056	0.196108	0.000197912	0.000480384
YDL217C	TIM22	12.5247	0.308519	0.114609	0.00609562	0.00811832	0.932221	0.124407	4.19025e-15	2.08374e-14	-0.601603	0.163676	0.000103391	0.00026136
YDL218W	YDL218W	1.59245	-0.00847532	0.289131	0.974323	0.977824	-0.0615728	0.271932	0.780421	0.816587	0.0488841	0.354014	0.854966	0.88128
YDL219W	DTD1	31.1286	0.260805	0.077294	0.0006759	0.000970852	0.647549	0.0817093	6.68916e-16	3.55638e-15	-0.383674	0.110816	0.000400066	0.00091894
YDL220C	CDC13	4.72756	1.23214	0.194528	4.10196e-11	8.95679e-11	0.40262	0.192425	0.0203081	0.0304909	0.662873	0.263752	0.00360712	0.00684771
YDL221W	YDL221W
YDL222C	FMP45	9.80393	1.56798	0.205393	1.14729e-15	3.10428e-15	-1.95408	0.216249	2.04639e-21	1.57593e-20	3.56599	0.298532	2.82106e-34	1.04675e-32
YDL223C	HBT1	8.45864	-0.347748	0.182404	0.0461509	0.0567369	-2.08221	0.200729	4.62864e-27	4.8441e-26	1.61829	0.280935	9.73719e-11	5.95912e-10
YDL224C	WHI4	35.714	-0.173441	0.0853304	0.0358776	0.0446451	-0.550827	0.0860306	6.46386e-11	2.35074e-10	0.371472	0.118462	0.00125769	0.00262005
YDL225W	SHS1	37.5112	-0.761842	0.0642276	1.05281e-32	5.2159e-32	-0.733099	0.0686095	2.36731e-27	2.51219e-26	-0.0207703	0.0927873	0.82035	0.851315
YDL226C	GCS1	97.0832	0.840007	0.0494928	6.47425e-65	8.08292e-64	0.659312	0.0518091	1.20565e-37	2.09743e-36	0.173991	0.0711554	0.0135149	0.0228522
YDL227C	HO	219.191	-4.26876	0.0754549	0	0	-2.97415	0.0763238	0	0	-1.26524	0.108077	5.18085e-33	1.69689e-31
YDL228C	YDL228C
YDL229W	SSB1	553.934	-0.833696	0.0992642	2.217e-17	6.41758e-17	0.185238	0.0990605	0.0501968	0.0701808	-0.992488	0.14103	2.05701e-13	1.68694e-12
YDL230W	PTP1	37.8258	0.0412456	0.0828789	0.600359	0.633427	-0.565295	0.0869959	3.27656e-11	1.2226e-10	0.598347	0.120428	3.11386e-07	1.16435e-06
YDL231C	BRE4	59.1279	0.08279	0.08653	0.312198	0.345541	-0.776506	0.0893088	5.4201e-19	3.55929e-18	0.848001	0.123907	1.32891e-12	9.98757e-12
YDL232W	OST4
YDL233W	MFG1	23.9236	0.729549	0.0939558	4.80106e-15	1.26613e-14	0.189763	0.0976929	0.042356	0.0600911	0.508415	0.133065	7.5263e-05	0.000194708
YDL234C	GYP7	22.2702	0.682223	0.119597	7.29802e-09	1.43686e-08	-0.186895	0.120938	0.100775	0.13298	0.830849	0.169796	1.72911e-07	6.68221e-07
YDL235C	YPD1	119.378	-0.578256	0.0538383	4.76068e-27	1.95815e-26	-0.0488573	0.0549253	0.340284	0.397698	-0.517556	0.0768328	1.04629e-11	7.10831e-11
YDL236W	PHO13	81.2704	0.082279	0.0484767	0.0709078	0.0853145	0.0309612	0.0486076	0.49379	0.552412	0.0498983	0.068258	0.460748	0.525522
YDL237W	AIM6	99.2647	0.782387	0.0584202	3.64196e-41	2.31428e-40	-0.141497	0.0604574	0.0160878	0.0245433	0.91372	0.0837164	1.2428e-28	2.97041e-27
YDL238C	GUD1	17.2132	0.545634	0.161575	0.000530477	0.000768627	-0.530703	0.161129	0.000412353	0.000783368	1.02745	0.234264	7.71406e-07	2.72509e-06
YDL239C	ADY3	23.7225	0.439693	0.128672	0.000512809	0.000744043	-0.419999	0.128678	0.00064711	0.0011972	0.823299	0.181868	1.13861e-06	3.91795e-06
YDL240W	LRG1	10.0149	1.2195	0.13753	1.38529e-19	4.3726e-19	0.857735	0.144102	2.53959e-10	8.81875e-10	0.297605	0.187984	0.090688	0.128028
YDL241W	YDL241W	29.8621	-3.24251	0.121693	2.12901e-158	1.82202e-156	-1.989	0.126158	8.03852e-58	2.96197e-56	-1.16904	0.176568	1.27997e-12	9.63333e-12
YDL242W	YDL242W
YDL243C	AAD4
YDL244W	THI13
YDL245C	HXT15
YDL246C	SOR2
YDL247W	MPH2
YDL248W	COS7
YDR001C	NTH1	236.929	2.08065	0.0913545	5.70956e-117	2.36679e-115	0.279858	0.0897248	0.00141862	0.00251578	1.77317	0.129419	3.31242e-44	2.25329e-42
YDR002W	YRB1	280.43	-0.456647	0.0423512	3.42614e-27	1.41582e-26	-0.0353032	0.042712	0.369507	0.427986	-0.413811	0.0603392	5.27048e-12	3.67963e-11
YDR003W	RCR2	34.8053	0.38836	0.1044	0.000170176	0.000257106	-0.0264054	0.1022	0.784719	0.820437	0.394491	0.145461	0.00465899	0.00862245
YDR004W	RAD57	23.1981	1.03077	0.126695	1.29646e-16	3.62626e-16	0.669032	0.128408	4.83962e-08	1.40093e-07	0.309153	0.173214	0.0585412	0.0863868
YDR005C	MAF1	29.4992	-0.0825765	0.0961003	0.365646	0.400686	-0.724667	0.0998359	7.9229e-14	3.6303e-13	0.623419	0.136799	2.10595e-06	6.97513e-06
YDR006C	SOK1	34.0601	0.128663	0.073024	0.0656188	0.0792203	-0.258093	0.0761728	0.000575908	0.00107408	0.382702	0.10351	0.000161811	0.000397301
YDR007W	TRP1	53.2253	1.42601	0.072436	2.56537e-87	5.71926e-86	0.991588	0.0757182	1.50309e-40	2.9759e-39	0.412985	0.102909	4.18195e-05	0.000112537
YDR008C	YDR008C
YDR009W	GAL3
YDR010C	YDR010C
YDR011W	SNQ2	100.024	-0.0989652	0.06552	0.109964	0.130006	0.224209	0.0650058	0.000482129	0.000907477	-0.322008	0.0905707	0.000313255	0.000729644
YDR012W	RPL4B
YDR013W	PSF1	48.6472	-0.56433	0.0811491	2.60069e-12	6.02063e-12	-0.422503	0.0828307	2.07615e-07	5.65506e-07	-0.128977	0.114247	0.247275	0.307319
YDR014W	RAD61	5.0296	-0.885785	0.201374	4.59184e-06	7.70778e-06	-0.378429	0.198446	0.033089	0.0477094	-0.381509	0.263639	0.094915	0.133268
YDR015C	YDR015C
YDR016C	DAD1	59.4914	0.484201	0.0562295	5.78734e-18	1.71073e-17	0.672266	0.0594864	3.45355e-30	4.34231e-29	-0.189899	0.0811393	0.0177915	0.0295283
YDR017C	KCS1	35.7999	1.06864	0.0755951	6.64969e-46	4.90045e-45	0.40883	0.0791724	1.5369e-07	4.2473e-07	0.632605	0.108686	2.6196e-09	1.32377e-08
YDR018C	YDR018C	2.87222	1.54802	0.274357	8.92792e-10	1.8262e-09	-0.101134	0.244828	0.624418	0.678649	1.49041	0.418429	5.44366e-06	1.68508e-05
YDR019C	GCV1	237.942	1.76588	0.127424	2.58608e-45	1.87712e-44	-0.0857115	0.121315	0.4509	0.510232	1.83196	0.181015	1.09023e-25	2.07339e-24
YDR020C	DAS2	17.3547	-2.69659	0.14034	8.89837e-85	1.85885e-83	-1.85153	0.149461	4.063e-37	6.82223e-36	-0.741971	0.196505	4.05457e-05	0.000109763
YDR021W	FAL1	11.1002	-0.716502	0.122441	2.8861e-09	5.78748e-09	-0.497287	0.135	0.000110215	0.000224234	-0.176135	0.175768	0.288367	0.351015
YDR022C	ATG31	28.3492	-0.179219	0.0945835	0.0497315	0.0608429	-0.746074	0.0977335	4.14991e-15	2.06949e-14	0.553528	0.132621	1.51368e-05	4.40086e-05
YDR023W	SES1	185.199	-0.317021	0.0645414	8.18913e-07	1.43215e-06	0.179728	0.0656722	0.00527414	0.008608	-0.488907	0.0912333	5.44165e-08	2.26103e-07
YDR024W	FYV1
YDR025W	RPS11A
YDR026C	NSI1	25.1996	-0.175072	0.0872028	0.0381064	0.0472633	0.318047	0.0915579	0.000383203	0.000731131	-0.483274	0.124084	6.18917e-05	0.000162412
YDR027C	VPS54	45.0591	0.704378	0.0710995	2.38216e-23	8.7231e-23	0.0407837	0.071104	0.543329	0.601372	0.643757	0.101266	8.67716e-11	5.36376e-10
YDR028C	REG1	78.5209	0.278747	0.0546449	3.13619e-07	5.61425e-07	-0.115501	0.0573351	0.0360944	0.0517473	0.390474	0.0780234	4.10449e-07	1.50925e-06
YDR029W	YDR029W
YDR030C	RAD28	8.86232	0.705451	0.152667	2.27826e-06	3.88696e-06	-0.10528	0.152923	0.455239	0.514154	0.74416	0.216233	0.000147365	0.000362841
YDR031W	MIX14	34.9536	0.35467	0.0918149	9.84074e-05	0.000150823	-0.50837	0.0935288	2.6392e-08	7.8276e-08	0.844875	0.131046	1.98498e-11	1.30836e-10
YDR032C	PST2	392.971	0.646525	0.0491488	1.07093e-39	6.53144e-39	-0.403289	0.0492293	1.67394e-16	9.33957e-16	1.04427	0.0698151	9.00671e-52	7.83436e-50
YDR033W	MRH1	37.093	0.548241	0.150924	0.000204267	0.00030617	0.292172	0.147931	0.0345122	0.0496399	0.210871	0.201647	0.257736	0.318331
YDR034C	LYS14	37.0756	1.08011	0.0890185	1.98649e-34	1.05298e-33	0.483595	0.0899612	3.97473e-08	1.15879e-07	0.562085	0.124927	3.4168e-06	1.09478e-05
YDR035W	ARO3	183.256	-0.511604	0.0955209	6.58534e-08	1.22905e-07	0.0365232	0.092243	0.675725	0.726377	-0.527396	0.132886	4.10051e-05	0.000110817
YDR036C	EHD3	46.9638	0.0738589	0.0618652	0.201495	0.22928	-0.129159	0.064678	0.0378551	0.0541692	0.205645	0.0874977	0.0171245	0.0285104
YDR037W	KRS1	493.361	-0.313805	0.0859725	0.000235281	0.000351564	-0.00496559	0.082228	0.949282	0.960872	-0.296813	0.119383	0.01073	0.0186057
YDR038C	ENA5
YDR039C	ENA2
YDR040C	ENA1
YDR041W	RSM10	41.4376	-0.508424	0.070552	4.48211e-13	1.07709e-12	-0.0909809	0.0730317	0.186442	0.230758	-0.401746	0.100172	4.35537e-05	0.000116951
YDR042C	YDR042C	8.20306	-2.05416	0.209874	1.01868e-24	3.85804e-24	-2.22399	0.22604	1.10174e-24	1.0079e-23	0.126306	0.265534	0.584317	0.643234
YDR043C	NRG1	17.1764	0.805572	0.208345	5.39951e-05	8.43634e-05	0.332107	0.201027	0.063562	0.0870574	0.353851	0.269117	0.128504	0.173466
YDR044W	HEM13	29.93	-0.204308	0.120849	0.0787201	0.0942438	-0.637271	0.121191	4.30382e-08	1.24855e-07	0.419257	0.165083	0.00739227	0.0132154
YDR045C	RPC11	43.0345	-0.668494	0.0710168	3.10725e-21	1.0508e-20	-0.10289	0.0761615	0.152925	0.193656	-0.545471	0.10278	6.28785e-08	2.59032e-07
YDR046C	BAP3	77.2922	0.586049	0.110168	7.38815e-08	1.37356e-07	0.925339	0.113357	2.12216e-17	1.25671e-16	-0.332358	0.152448	0.0228265	0.0370843
YDR047W	HEM12	61.7809	-0.760756	0.053656	7.0297e-46	5.16615e-45	-1.11267	0.0573525	1.67608e-85	1.45791e-83	0.349026	0.077714	5.36255e-06	1.66104e-05
YDR048C	YDR048C
YDR049W	VMS1	20.3364	-0.506425	0.106247	1.45401e-06	2.51712e-06	-0.593469	0.110823	3.04392e-08	8.96781e-08	0.0982499	0.149161	0.492477	0.554559
YDR050C	TPI1	2083.42	-0.720723	0.0436242	1.55404e-61	1.79255e-60	-0.111341	0.0441135	0.00975591	0.0153696	-0.602487	0.0614827	6.65543e-23	1.06367e-21
YDR051C	DET1	30.1958	1.26687	0.0834935	8.57826e-53	7.78056e-52	0.819057	0.0862183	2.58479e-22	2.07174e-21	0.418956	0.117615	0.000252137	0.000596186
YDR052C	DBF4	31.016	0.765009	0.0813679	2.98478e-21	1.01003e-20	0.626362	0.0851004	5.86575e-14	2.71112e-13	0.122905	0.11564	0.275945	0.337832
YDR053W	YDR053W
YDR054C	CDC34	19.5706	-0.221476	0.115742	0.0477545	0.0585321	-0.271443	0.116986	0.0152794	0.0234246	0.0557096	0.1587	0.712928	0.758379
YDR055W	PST1	55.348	0.432364	0.0874532	6.38069e-07	1.12143e-06	0.302924	0.0882339	0.000456612	0.000861893	0.117542	0.122212	0.32233	0.384939
YDR056C	EMC10	92.2923	-0.696204	0.0498789	1.75542e-44	1.24356e-43	-0.905435	0.0522804	2.49225e-68	1.32239e-66	0.209886	0.0716519	0.00308893	0.00595996
YDR057W	YOS9	11.9052	-0.956323	0.131134	1.14627e-13	2.82363e-13	-1.32363	0.142109	1.47323e-22	1.20261e-21	0.340397	0.181951	0.0464517	0.0700207
YDR058C	TGL2	8.60635	0.197571	0.140126	0.140229	0.163709	-1.21465	0.15559	9.30946e-17	5.3e-16	1.38174	0.213175	1.2231e-12	9.24467e-12
YDR059C	UBC5	113.843	-0.412298	0.0580806	1.0716e-12	2.52708e-12	-1.2709	0.0599125	9.37836e-102	1.13095e-99	0.847082	0.0830666	3.70396e-25	6.82404e-24
YDR060W	MAK21	35.9266	-0.370741	0.122578	0.00209765	0.00289923	0.135729	0.123959	0.242036	0.292785	-0.479716	0.170519	0.00295355	0.00571537
YDR061W	YDR061W	62.2103	-0.158962	0.0623536	0.00937135	0.0123141	0.114701	0.0647507	0.0633871	0.0868401	-0.272026	0.0878857	0.00168574	0.0034231
YDR062W	LCB2	56.6502	-0.364654	0.0601509	1.18241e-09	2.40748e-09	-0.388751	0.0632392	5.27373e-10	1.7903e-09	0.0279906	0.0865627	0.743061	0.784184
YDR063W	AIM7	56.0342	1.13393	0.0656175	1.6088e-67	2.13407e-66	0.611875	0.0668841	1.98301e-20	1.4335e-19	0.50321	0.0928347	3.53162e-08	1.51241e-07
YDR064W	RPS13	1100.89	-1.35378	0.0970621	3.86872e-45	2.79285e-44	0.216729	0.0960823	0.019293	0.0291068	-1.5601	0.138884	1.04875e-30	3.02427e-29
YDR065W	RRG1	9.16917	-0.751266	0.148889	2.51021e-07	4.51192e-07	-0.80406	0.159243	5.67701e-08	1.6353e-07	0.0788628	0.203866	0.674756	0.725188
YDR066C	RTR2	9.90476	1.47246	0.170163	3.71352e-19	1.1543e-18	0.697338	0.170797	9.57864e-06	2.1907e-05	0.634573	0.229642	0.00206673	0.00412103
YDR067C	OCA6	31.0174	-0.419841	0.0940083	6.69848e-06	1.11243e-05	-0.342068	0.0965997	0.000284925	0.000553979	-0.0651353	0.132214	0.610233	0.666371
YDR068W	DOS2	34.5318	0.576925	0.070879	2.87474e-16	7.94447e-16	0.476359	0.0749315	1.10205e-10	3.94299e-10	0.0904336	0.101895	0.3651	0.429286
YDR069C	DOA4	12.7958	-0.223983	0.137999	0.0906952	0.107971	-0.754646	0.141315	1.56239e-08	4.73987e-08	0.506705	0.188998	0.00393671	0.00739928
YDR070C	FMP16	65.2369	3.50512	0.177067	6.14808e-89	1.40611e-87	0.0554996	0.162143	0.709075	0.754735	3.39214	0.251943	3.28283e-42	1.85305e-40
YDR071C	PAA1	110.815	-0.0222587	0.0463486	0.603656	0.636399	0.10353	0.0513391	0.0355845	0.0511129	-0.129163	0.0695173	0.0608123	0.0892834
YDR072C	IPT1	29.7147	0.0258168	0.0785693	0.729647	0.754827	0.430169	0.0838271	1.72981e-07	4.74581e-07	-0.396226	0.115415	0.00042288	0.00096466
YDR073W	SNF11	47.7311	1.2293	0.107425	4.6054e-31	2.16441e-30	1.10667	0.109942	1.83282e-25	1.73659e-24	0.103912	0.147298	0.462206	0.526732
YDR074W	TPS2	118.03	0.450427	0.0919284	7.86842e-07	1.37652e-06	-0.594793	0.0915841	2.99973e-11	1.12167e-10	1.02869	0.13093	2.64032e-16	2.66341e-15
YDR075W	PPH3	10.2469	0.378087	0.130174	0.00306268	0.00417859	-0.0590009	0.130635	0.62896	0.682048	0.406264	0.181164	0.0168787	0.0281189
YDR076W	RAD55	0.817642	2.06806	0.482145	1.61042e-07	2.92633e-07	0.36215	0.363882	0.158166	0.199389	0.921975	0.57728	0.0109589	0.0189408
YDR077W	SED1	623.51	0.525263	0.0676349	6.20693e-15	1.62476e-14	0.836341	0.0679845	9.89037e-36	1.57593e-34	-0.309454	0.0946508	0.00089235	0.00191615
YDR078C	SHU2	59.5492	-0.91113	0.10654	5.0898e-18	1.50958e-17	-0.42599	0.106566	3.8276e-05	8.16288e-05	-0.444602	0.147604	0.00171081	0.00346605
YDR079W	PET100	46.3989	0.0622839	0.0690226	0.336309	0.370526	-0.0723999	0.071099	0.278969	0.333487	0.139664	0.0982861	0.148152	0.196311
YDR080W	VPS41	18.0828	0.837054	0.116401	3.11783e-13	7.55053e-13	0.63193	0.121351	5.79707e-08	1.66807e-07	0.169474	0.162241	0.272379	0.334238
YDR081C	PDC2	20.2941	0.622054	0.0983269	1.71167e-10	3.63722e-10	0.33525	0.101893	0.000717492	0.00131685	0.261798	0.138778	0.0506692	0.0756683
YDR082W	STN1	13.8544	0.54147	0.141954	0.000100637	0.000154107	-0.040014	0.139334	0.757791	0.798102	0.531899	0.196385	0.00339646	0.00649895
YDR083W	RRP8	14.3896	-0.330953	0.138261	0.0139205	0.0180592	0.183581	0.143444	0.168011	0.211098	-0.482201	0.193296	0.00731426	0.0130892
YDR084C	TVP23	58.9608	0.244174	0.0637323	0.000119225	0.000181836	0.00478351	0.0624433	0.93551	0.949468	0.233607	0.0905057	0.0087223	0.0153211
YDR085C	AFR1	10.9769	3.4467	0.203893	6.6153e-66	8.41746e-65	2.51984	0.208414	1.85755e-35	2.92468e-34	0.732152	0.271933	0.00173502	0.00351375
YDR086C	SSS1	353.009	-0.537666	0.0391283	4.37949e-43	2.97536e-42	-0.253977	0.0398379	1.55019e-10	5.4617e-10	-0.280106	0.0556731	4.30429e-07	1.57943e-06
YDR087C	RRP1	28.3881	-1.05314	0.115952	3.19195e-20	1.0365e-19	-0.16701	0.119909	0.138385	0.176763	-0.824797	0.166347	1.48582e-07	5.82687e-07
YDR088C	SLU7	9.77942	1.07577	0.136203	7.94241e-16	2.17117e-15	0.539903	0.143114	6.71634e-05	0.000139588	0.456774	0.190391	0.0101098	0.0176051
YDR089W	VTC5	55.9415	1.14381	0.106337	1.30197e-27	5.46971e-27	0.26627	0.106147	0.0092867	0.014674	0.826583	0.149717	6.41439e-09	3.06619e-08
YDR090C	ILT1	29.9223	-0.262774	0.10471	0.0104481	0.0136815	-0.395377	0.106326	0.00012826	0.000259652	0.136123	0.145259	0.32849	0.391415
YDR091C	RLI1	26.5917	-0.559883	0.12382	4.47118e-06	7.51237e-06	0.0144581	0.12234	0.899927	0.918449	-0.533855	0.173104	0.00108467	0.00228837
YDR092W	UBC13
YDR093W	DNF2	56.4112	0.231341	0.0591674	8.69696e-05	0.000133834	-0.262682	0.0616365	1.68759e-05	3.77162e-05	0.487874	0.0849829	5.87076e-09	2.81648e-08
YDR094W	YDR094W
YDR095C	YDR095C
YDR096W	GIS1	19.6961	1.22257	0.121675	1.72894e-24	6.49241e-24	0.200386	0.120161	0.077283	0.10413	0.956961	0.172083	2.68582e-09	1.35337e-08
YDR097C	MSH6	20.9412	-0.747708	0.109643	5.18718e-12	1.18379e-11	-1.15284	0.116023	5.55805e-25	5.15577e-24	0.388513	0.153352	0.00790187	0.0140131
YDR098C	GRX3	95.8884	-0.466305	0.0509579	4.60103e-20	1.48137e-19	-0.484072	0.0533304	5.93292e-20	4.17507e-19	0.0211619	0.0732958	0.770237	0.808323
YDR099W	BMH2	227.626	0.55986	0.0401319	2.3186e-44	1.63597e-43	0.202301	0.0409945	7.22349e-07	1.86601e-06	0.353389	0.0572021	5.07773e-10	2.85407e-09
YDR100W	TVP15	62.3501	0.686018	0.0676671	2.35866e-24	8.84457e-24	0.494459	0.0692501	4.76433e-13	2.03703e-12	0.180548	0.0957729	0.0552269	0.0819216
YDR101C	ARX1	47.0731	-0.887769	0.116735	1.25236e-14	3.232e-14	-0.0200395	0.114586	0.852803	0.878124	-0.817357	0.16591	1.81338e-07	6.99768e-07
YDR102C	YDR102C
YDR103W	STE5	10.7557	0.381435	0.161108	0.014448	0.0186796	-0.916434	0.169279	4.22306e-09	1.35393e-08	1.26328	0.240749	3.21806e-09	1.60178e-08
YDR104C	SPO71	25.1028	-0.161985	0.0927278	0.0691741	0.0833609	-0.914172	0.0972114	3.65235e-22	2.9011e-21	0.732536	0.131479	7.01286e-09	3.32164e-08
YDR105C	TMS1	35.8848	-0.172843	0.0770659	0.0213063	0.0271041	-0.590291	0.0783565	1.8278e-14	8.76091e-14	0.411969	0.107817	9.01796e-05	0.000230684
YDR106W	ARP10	6.57458	-1.58591	0.190991	4.76277e-18	1.41496e-17	-2.02773	0.204527	4.8997e-25	4.56903e-24	0.344899	0.249466	0.115238	0.157591
YDR107C	TMN2	15.007	0.696024	0.106642	4.13537e-11	9.02231e-11	-0.20824	0.110677	0.0479927	0.0675283	0.872746	0.153724	1.95832e-09	1.00492e-08
YDR108W	TRS85	18.7923	0.0207176	0.100743	0.829851	0.847745	-0.484362	0.108516	4.12967e-06	9.85253e-06	0.493281	0.147599	0.000477825	0.00107613
YDR109C	YDR109C	17.347	0.04655	0.108509	0.653563	0.68412	-0.438739	0.114986	7.80493e-05	0.000161077	0.472993	0.156664	0.00152555	0.00312531
YDR110W	FOB1	13.9335	0.125492	0.117312	0.261604	0.29292	0.122754	0.123177	0.286966	0.341629	-0.00272065	0.165409	0.986202	0.990683
YDR111C	ALT2	79.7881	0.888988	0.083971	1.52139e-26	6.16691e-26	3.02219	0.0918456	2.63308e-239	1.16426e-236	-2.10547	0.124808	2.24189e-64	3.96516e-62
YDR112W	IRC2
YDR113C	PDS1	49.7301	0.487548	0.0858413	1.07138e-08	2.09075e-08	0.0106024	0.0836677	0.893788	0.913413	0.458274	0.120578	9.2134e-05	0.000234692
YDR114C	YDR114C
YDR115W	MRX14	79.354	-0.265385	0.0605031	1.07556e-05	1.75922e-05	0.263302	0.0615771	1.58253e-05	3.543e-05	-0.521805	0.0858937	7.65219e-10	4.19448e-09
YDR116C	MRPL1	28.2399	-0.664521	0.0831733	8.76435e-16	2.38833e-15	0.0259064	0.0814915	0.737331	0.77996	-0.670499	0.117629	4.79889e-09	2.33391e-08
YDR117C	TMA64	35.0089	0.0757025	0.0761353	0.291349	0.323884	-0.23984	0.0794124	0.00207393	0.00360324	0.314236	0.10863	0.00306399	0.00591607
YDR118W	APC4	9.63594	0.857691	0.149702	4.63605e-09	9.20617e-09	0.502037	0.152507	0.000458696	0.00086545	0.288034	0.20358	0.12569	0.17032
YDR119W	VBA4	13.1387	0.785316	0.126468	2.81593e-10	5.92909e-10	0.968945	0.135633	4.57548e-14	2.12961e-13	-0.188146	0.175626	0.256133	0.31672
YDR120C	TRM1	24.9093	0.143692	0.109729	0.169951	0.195864	0.309503	0.112777	0.00440567	0.00727786	-0.163105	0.152599	0.265118	0.326611
YDR121W	DPB4	53.7226	-0.580856	0.0595462	1.27285e-22	4.53576e-22	-1.03076	0.0641016	1.19843e-59	4.81732e-58	0.445444	0.0864734	1.70827e-07	6.61411e-07
YDR122W	KIN1	62.9439	1.23878	0.0924326	1.03985e-41	6.78653e-41	-0.230362	0.0921849	0.0099711	0.0156714	1.45721	0.132963	7.47131e-30	1.96251e-28
YDR123C	INO2	0.773612	-0.20569	0.340008	0.49299	0.52898	-0.130568	0.312972	0.583088	0.640685	-0.0193801	0.396218	0.903314	0.921728
YDR124W	YDR124W	0.892741	1.38783	0.406117	5.44409e-05	8.50098e-05	0.222314	0.332139	0.364031	0.422473	0.67531	0.48704	0.0295517	0.0466393
YDR125C	ECM18	1.10748	-0.725815	0.379755	0.0265495	0.0334771	-1.74791	0.477893	1.84432e-06	4.55798e-06	0.588415	0.471499	0.0420485	0.0640037
YDR126W	SWF1	7.72409	0.482887	0.157616	0.00167367	0.00233574	-0.362574	0.164817	0.0174108	0.0264594	0.789885	0.227134	0.000102592	0.000259711
YDR127W	ARO1	241.662	-0.0494157	0.0835525	0.533079	0.567862	0.132868	0.0860259	0.103845	0.136488	-0.184066	0.118676	0.111609	0.153181
YDR128W	MTC5	26.0994	0.406157	0.0997377	3.94398e-05	6.23005e-05	-0.136484	0.102747	0.159337	0.200722	0.5234	0.140791	0.000108426	0.000273175
YDR129C	SAC6	174.03	1.03137	0.0450496	1.7274e-116	7.05045e-115	0.325088	0.0459755	1.17179e-12	4.84609e-12	0.697105	0.0642547	6.33628e-28	1.38927e-26
YDR130C	FIN1	15.5048	0.211936	0.112584	0.0513273	0.0627518	-0.020201	0.111293	0.847466	0.873476	0.220864	0.155756	0.13727	0.183928
YDR131C	YDR131C	20.9232	0.0786404	0.114075	0.469812	0.505746	-0.512683	0.117922	6.4216e-06	1.49509e-05	0.575045	0.162026	0.000178808	0.000437213
YDR132C	MRX16	25.9495	-1.00455	0.107	2.07898e-21	7.08029e-21	-1.80277	0.113998	3.40695e-58	1.29123e-56	0.745316	0.153025	2.94419e-07	1.10793e-06
YDR133C	YDR133C
YDR134C	CCW22
YDR135C	YCF1	105.967	1.61002	0.052258	8.63298e-210	1.34725e-207	1.18415	0.0546377	6.03646e-106	9.70589e-104	0.415443	0.0748223	1.96081e-08	8.69903e-08
YDR136C	VPS61
YDR137W	RGP1	39.214	0.731466	0.0884082	7.61163e-17	2.1494e-16	0.236025	0.0911064	0.00766573	0.0122366	0.469045	0.125036	0.000108532	0.000273313
YDR138W	HPR1	1.78474	-0.942955	0.236122	2.36541e-05	3.78836e-05	-0.406764	0.242449	0.0486705	0.0683371	-0.35058	0.30746	0.166366	0.217156
YDR139C	RUB1
YDR140W	MTQ2	30.645	0.775107	0.084363	2.19449e-20	7.19652e-20	0.527723	0.088225	1.00829e-09	3.34582e-09	0.226918	0.11998	0.0519556	0.0774372
YDR141C	DOP1	43.8906	0.680565	0.0771977	7.52881e-19	2.3118e-18	0.250036	0.0794333	0.00134439	0.00238732	0.412041	0.109521	0.000115322	0.000289356
YDR142C	PEX7	20.3786	-0.353837	0.113286	0.00153148	0.00214125	-0.95633	0.120337	1.03199e-16	5.86895e-16	0.580804	0.160087	0.000129584	0.0003225
YDR143C	SAN1	22.0723	-0.734122	0.0937508	2.83152e-15	7.51953e-15	-0.41009	0.0977744	1.71195e-05	3.82307e-05	-0.297475	0.132975	0.0208633	0.0341247
YDR144C	MKC7	27.3112	-0.329975	0.0815813	4.69115e-05	7.36863e-05	-0.0154179	0.0828454	0.844505	0.87127	-0.301605	0.116857	0.00802843	0.0142138
YDR145W	TAF12
YDR146C	SWI5	14.2278	-0.0529898	0.117421	0.636945	0.667911	0.0689798	0.119838	0.539613	0.597938	-0.121328	0.166171	0.44232	0.506681
YDR147W	EKI1	38.8926	-0.757326	0.0917412	8.53859e-17	2.40477e-16	-1.09969	0.0956614	3.32886e-32	4.59972e-31	0.334227	0.128784	0.00733576	0.0131188
YDR148C	KGD2	103.207	0.055333	0.0568944	0.294977	0.327574	0.0235784	0.0555001	0.651279	0.703519	0.0327142	0.0804134	0.680433	0.729664
YDR149C	YDR149C
YDR150W	NUM1	67.7812	0.835745	0.0632114	3.26287e-40	2.01781e-39	0.267099	0.06512	3.38503e-05	7.27754e-05	0.553335	0.0902577	4.67008e-10	2.62772e-09
YDR151C	CTH1	23.8462	-0.775339	0.108282	4.36897e-13	1.05037e-12	-0.19215	0.110313	0.0664057	0.090578	-0.541043	0.151431	0.000187237	0.000455517
YDR152W	GIR2	85.0539	-0.541284	0.0565672	8.1668e-22	2.82668e-21	-0.680239	0.0595641	8.51461e-31	1.09391e-29	0.141666	0.0814025	0.0781975	0.111958
YDR153C	ENT5	73.2133	-0.50629	0.0593415	1.12818e-17	3.30359e-17	-0.239738	0.0614655	8.1991e-05	0.000168818	-0.258581	0.0848356	0.00202808	0.00405004
YDR154C	YDR154C
YDR155C	CPR1	1584.53	0.573594	0.0523101	4.09659e-28	1.75012e-27	0.145164	0.0524937	0.004918	0.00806643	0.420871	0.0734909	7.12498e-09	3.35747e-08
YDR156W	RPA14	71.122	-0.857879	0.08414	9.75938e-25	3.70675e-24	-0.450959	0.0860289	9.06746e-08	2.5483e-07	-0.382467	0.118609	0.000948575	0.00202622
YDR157W	YDR157W
YDR158W	HOM2	543.269	-0.685842	0.105262	4.52234e-11	9.83424e-11	-0.268292	0.104154	0.00767009	0.0122398	-0.386162	0.14489	0.00558424	0.0102102
YDR159W	SAC3	22.2268	0.3986	0.0851821	2.46404e-06	4.19314e-06	0.166326	0.0904258	0.0543679	0.0753989	0.216974	0.121619	0.0667835	0.0970831
YDR160W	SSY1	15.1107	0.615441	0.120079	2.02997e-07	3.66486e-07	-0.031464	0.118567	0.777878	0.814087	0.606683	0.168507	0.00013313	0.000330551
YDR161W	ACL4	43.5241	-0.238989	0.0963038	0.0113502	0.0148335	0.0873215	0.0984028	0.346292	0.404007	-0.317242	0.135272	0.0152789	0.0255902
YDR162C	NBP2	39.816	1.06507	0.0694295	1.21769e-53	1.12367e-52	0.782305	0.0739516	5.69584e-27	5.87979e-26	0.265988	0.0999122	0.00664779	0.0119489
YDR163W	CWC15	15.3777	0.517974	0.110108	1.95153e-06	3.35108e-06	0.813137	0.116302	3.40361e-13	1.47545e-12	-0.293964	0.154647	0.0470557	0.0708708
YDR164C	SEC1	27.7977	-0.0895308	0.0946034	0.318732	0.352406	-0.774804	0.0992817	9.36354e-16	4.90453e-15	0.665831	0.135253	3.09176e-07	1.1569e-06
YDR165W	TRM82	40.4914	-1.0824	0.0901639	9.43351e-34	4.89288e-33	-0.527603	0.094342	1.01721e-08	3.13979e-08	-0.518005	0.128509	3.1647e-05	8.68247e-05
YDR166C	SEC5	24.9637	0.52069	0.0937625	2.14987e-08	4.12706e-08	0.499718	0.0971399	1.32706e-07	3.68079e-07	0.00806795	0.132179	0.949729	0.959494
YDR167W	TAF10	79.4468	-0.688268	0.0471484	1.82558e-48	1.45444e-47	-0.529898	0.0500866	1.71506e-26	1.71055e-25	-0.152748	0.0683983	0.024246	0.0391735
YDR168W	CDC37	65.2347	0.392689	0.0591188	2.66653e-11	5.88054e-11	0.0966205	0.0619177	0.0992521	0.131231	0.286802	0.0841904	0.00055336	0.00122953
YDR169C	STB3	15.036	0.676276	0.129742	1.1701e-07	2.1468e-07	0.420957	0.131139	0.000777197	0.00142249	0.214873	0.177924	0.199352	0.254515
YDR170C	SEC7	96.3163	1.19594	0.0526266	5.18167e-115	2.04926e-113	0.594913	0.0543767	2.71621e-28	3.04698e-27	0.587467	0.0752813	2.74105e-15	2.60179e-14
YDR171W	HSP42	63.4095	0.945566	0.126633	3.1782e-14	8.09191e-14	-0.4301	0.124538	0.000320462	0.000618542	1.35634	0.184405	2.88603e-15	2.73452e-14
YDR172W	SUP35	115.088	0.0100672	0.0548966	0.845254	0.861102	0.192903	0.0600362	0.00114659	0.00205325	-0.180403	0.0828233	0.027554	0.043786
YDR173C	ARG82	15.3333	-0.380645	0.123768	0.00176245	0.00245062	-0.327058	0.127203	0.00704298	0.0112832	-0.0346273	0.171345	0.831016	0.860869
YDR174W	HMO1	295.632	0.767998	0.0356753	4.81829e-103	1.55889e-101	0.779832	0.0365033	4.58674e-102	5.65982e-100	-0.0137037	0.0508393	0.786598	0.82305
YDR175C	RSM24	50.5959	-1.12805	0.062805	9.80336e-73	1.51652e-71	-0.757176	0.0650306	4.34143e-32	5.89147e-31	-0.355848	0.0893849	5.30052e-05	0.000140764
YDR176W	NGG1	27.9097	0.219601	0.0799227	0.00532201	0.00712017	-0.0576913	0.0817822	0.454811	0.513987	0.272486	0.113484	0.0140482	0.0237237
YDR177W	UBC1	81.4813	0.0288621	0.0470304	0.505878	0.541495	0.255931	0.051002	4.40548e-07	1.16238e-06	-0.222652	0.0701307	0.00136915	0.00283113
YDR178W	SDH4	79.6116	0.0856885	0.077526	0.241369	0.271508	-0.356592	0.0768916	2.50227e-06	6.09597e-06	0.438764	0.107767	3.09513e-05	8.5048e-05
YDR179C	CSN9	16.9191	0.0245729	0.099498	0.796257	0.816729	-0.119566	0.10708	0.235419	0.285581	0.144975	0.145062	0.299248	0.3621
YDR180W	SCC2	15.2385	0.0821653	0.103821	0.405685	0.441099	-0.114795	0.109065	0.263006	0.316012	0.196648	0.147985	0.165534	0.216336
YDR181C	SAS4	16.4456	0.528849	0.109972	1.14905e-06	1.99569e-06	0.529573	0.113746	1.43389e-06	3.5837e-06	-0.0171493	0.153624	0.906875	0.924828
YDR182W	CDC1	45.7727	0.758842	0.0654888	2.69635e-31	1.27739e-30	0.53527	0.0682279	1.94762e-15	9.99426e-15	0.211686	0.0935744	0.0214989	0.035087
YDR183W	PLP1	23.6167	0.287066	0.0900032	0.00127329	0.00179206	0.169859	0.0950512	0.0610317	0.0840692	0.105553	0.127782	0.394025	0.458285
YDR184C	ATC1	21.4534	-1.30342	0.139937	1.71416e-21	5.85285e-21	-0.409808	0.143044	0.00245386	0.00421365	-0.793782	0.198422	1.41845e-05	4.14836e-05
YDR185C	UPS3	4.32771	0.853552	0.209151	2.00449e-05	3.23277e-05	0.31989	0.208299	0.0820316	0.11022	0.396015	0.27536	0.0936088	0.131748
YDR186C	SND1	38.1328	0.258174	0.0707952	0.000245448	0.000366445	0.0374993	0.0718953	0.580818	0.638454	0.211296	0.101189	0.0333256	0.0518398
YDR187C	YDR187C
YDR188W	CCT6	153.375	-0.470778	0.0418766	2.05723e-29	9.18053e-29	-0.637796	0.0440425	4.9578e-48	1.29587e-46	0.168185	0.0604847	0.00508274	0.00936099
YDR189W	SLY1	74.8845	0.107297	0.0506823	0.0277495	0.0349305	-0.537349	0.0522855	4.03208e-25	3.77323e-24	0.641779	0.071776	1.62839e-19	2.08198e-18
YDR190C	RVB1	73.5911	-0.349624	0.0589967	2.76109e-09	5.54308e-09	-0.504236	0.0620039	2.09968e-16	1.16293e-15	0.156576	0.0848731	0.0613837	0.0900226
YDR191W	HST4	12.2918	-0.768605	0.148716	1.27641e-07	2.33459e-07	-1.22481	0.160589	3.7056e-16	2.01042e-15	0.418535	0.203988	0.0260091	0.0416931
YDR192C	NUP42	13.4654	-0.0504979	0.0931376	0.569083	0.603428	-0.131602	0.103393	0.177145	0.220744	0.0813281	0.137447	0.540414	0.60215
YDR193W	YDR193W
YDR194C	MSS116	41.7535	-0.999656	0.0745674	1.9429e-41	1.25567e-40	-0.218553	0.0759258	0.00332578	0.00559853	-0.756987	0.105953	2.46113e-13	1.99981e-12
YDR195W	REF2	23.1586	0.342184	0.0869468	7.36187e-05	0.000114017	-0.00522943	0.0878006	0.949959	0.961374	0.333673	0.124024	0.0055647	0.010178
YDR196C	CAB5	56.1561	0.613386	0.0789497	5.46553e-15	1.43565e-14	0.117721	0.0809059	0.124696	0.160708	0.474851	0.111226	1.22303e-05	3.61526e-05
YDR197W	CBS2	20.5302	0.315403	0.094166	0.000718181	0.0010288	-0.00174653	0.0936157	0.984305	0.988777	0.302534	0.132716	0.0183818	0.0304318
YDR198C	RKM2	20.2946	-0.596196	0.0978373	7.76798e-10	1.59632e-09	-0.912999	0.104728	1.98574e-19	1.3371e-18	0.31389	0.139005	0.0189688	0.0313253
YDR199W	YDR199W
YDR200C	VPS64	23.0791	1.35233	0.0936941	3.80794e-48	3.00669e-47	0.917697	0.0975929	3.59653e-22	2.86534e-21	0.399388	0.131533	0.0016907	0.00343184
YDR201W	SPC19	35.5647	-0.178144	0.0741607	0.0140755	0.0182508	-0.0970368	0.0769608	0.181608	0.225618	-0.0746008	0.104556	0.466132	0.529519
YDR202C	RAV2	37.6271	0.932436	0.120759	4.59794e-15	1.21437e-14	-0.0528047	0.117186	0.63173	0.684492	0.93897	0.171937	4.94322e-09	2.39313e-08
YDR203W	YDR203W
YDR204W	COQ4	100.238	1.30534	0.0762609	1.5809e-66	2.04592e-65	-0.0297705	0.0740203	0.67087	0.721743	1.32125	0.109529	2.5441e-35	9.99924e-34
YDR205W	MSC2	24.9051	-0.366419	0.0843961	1.23871e-05	2.01737e-05	-0.976655	0.09002	9.53746e-29	1.10493e-27	0.597384	0.121203	3.94432e-07	1.45236e-06
YDR206W	EBS1	39.3347	-1.36754	0.0818665	1.37737e-63	1.64602e-62	-1.56614	0.0877245	3.25523e-73	1.96276e-71	0.190597	0.116844	0.0939541	0.132128
YDR207C	UME6	16.0573	0.597426	0.102407	3.80447e-09	7.58036e-09	0.190047	0.10797	0.0639112	0.0874679	0.375945	0.145307	0.00722551	0.0129522
YDR208W	MSS4	49.4283	0.522642	0.0651562	8.04766e-16	2.19881e-15	0.334458	0.0672244	4.843e-07	1.27402e-06	0.17938	0.0927764	0.0492782	0.0738408
YDR209C	YDR209C
YDR210W	YDR210W
YDR211W	GCD6	63.2456	-0.856419	0.0632296	4.05516e-42	2.68623e-41	-0.748041	0.06677	7.21391e-30	8.81958e-29	-0.0989621	0.0908217	0.267836	0.329349
YDR212W	TCP1	60.6627	-0.151182	0.0630689	0.0141301	0.0183087	0.123863	0.066207	0.0507701	0.0708538	-0.273362	0.0893135	0.00189216	0.00380151
YDR213W	UPC2	16.3874	-0.597454	0.129672	2.83921e-06	4.81306e-06	-1.28631	0.139918	4.89925e-22	3.87413e-21	0.640728	0.182979	0.000171504	0.000420277
YDR214W	AHA1	75.2416	-0.649891	0.0780013	5.26338e-17	1.49745e-16	0.0216512	0.0763708	0.764891	0.803188	-0.654203	0.110443	1.33922e-09	7.05651e-09
YDR215C	YDR215C
YDR216W	ADR1	3.77735	0.280299	0.227371	0.187678	0.214941	-0.739725	0.24009	0.000333256	0.000642068	0.936262	0.331968	0.000464395	0.00104899
YDR217C	RAD9	14.4738	0.953836	0.113788	1.98046e-17	5.75482e-17	0.174432	0.118412	0.117684	0.152598	0.722669	0.162467	2.70681e-06	8.81667e-06
YDR218C	SPR28	0.791268	0.279114	0.46491	0.449551	0.485314	0.171295	0.393838	0.50089	0.558933	0.0128218	0.480891	1	1
YDR219C	MFB1	30.4679	-0.284922	0.0856469	0.000791533	0.00112961	-0.470141	0.0872734	3.88118e-08	1.13276e-07	0.186916	0.120196	0.109649	0.151116
YDR220C	YDR220C
YDR221W	GTB1	14.7583	1.77133	0.117296	3.54062e-53	3.24465e-52	0.778466	0.121225	2.03446e-11	7.69411e-11	0.907584	0.167234	6.77596e-09	3.21873e-08
YDR222W	YDR222W	7.68074	-0.409479	0.180564	0.018345	0.0234664	-1.25413	0.199563	4.82291e-12	1.9083e-11	0.750741	0.253773	0.000704772	0.0015408
YDR223W	CRF1	6.99375	-1.0259	0.247055	9.7327e-06	1.59585e-05	-2.88496	0.265165	1.92087e-29	2.29553e-28	1.56204	0.384319	5.47665e-07	1.97412e-06
YDR224C	HTB1	685.007	-0.280902	0.0630688	7.80611e-06	1.29112e-05	0.148641	0.0636063	0.0162325	0.024757	-0.423445	0.0884471	1.21971e-06	4.18344e-06
YDR225W	HTA1	448.406	0.62988	0.0693069	6.84013e-20	2.18505e-19	0.468786	0.0690747	6.30805e-12	2.48114e-11	0.15127	0.0967723	0.111721	0.153255
YDR226W	ADK1	290.852	-1.05527	0.0708238	1.00189e-50	8.56044e-50	-0.118488	0.0718032	0.0829145	0.111322	-0.914047	0.100276	1.4364e-20	1.95424e-19
YDR227W	SIR4	13.8108	0.320365	0.113394	0.00406169	0.00549638	0.0785942	0.115891	0.470214	0.529265	0.219268	0.158992	0.148227	0.196328
YDR228C	PCF11	23.8004	-0.00782664	0.10302	0.93678	0.944613	-0.494233	0.110188	3.61729e-06	8.66908e-06	0.473157	0.15022	0.000987924	0.00210097
YDR229W	IVY1	23.7079	0.262921	0.108247	0.0130312	0.0169469	-0.361988	0.109381	0.00063468	0.00117533	0.603911	0.151322	2.95176e-05	8.15307e-05
YDR230W	YDR230W
YDR231C	COX20	62.8714	0.283128	0.0817971	0.000487462	0.000708755	0.119144	0.0832801	0.130978	0.168151	0.152997	0.114392	0.170328	0.221945
YDR232W	HEM1	67.0928	-0.863216	0.0640418	9.7627e-42	6.39056e-41	-0.387605	0.066029	2.91608e-09	9.42308e-09	-0.460198	0.091309	3.13695e-07	1.17134e-06
YDR233C	RTN1	191.492	-0.601016	0.0529837	5.64921e-30	2.55321e-29	-0.249849	0.0536952	2.77857e-06	6.7228e-06	-0.343731	0.0750441	3.76711e-06	1.19404e-05
YDR234W	LYS4	230.464	-0.500337	0.100449	4.94315e-07	8.74861e-07	-0.108846	0.0992822	0.244679	0.2958	-0.365444	0.13866	0.00631224	0.0113998
YDR235W	PRP42	26.1973	0.0414831	0.0915665	0.634501	0.665875	-0.243839	0.0972218	0.00957403	0.01511	0.281858	0.132582	0.0277475	0.0440802
YDR236C	FMN1	72.4593	0.641814	0.0719634	3.15868e-19	9.85301e-19	0.668283	0.0740661	4.93625e-20	3.48758e-19	-0.0335584	0.101788	0.736823	0.779578
YDR237W	MRPL7	37.9902	-0.663019	0.0752083	7.72434e-19	2.36636e-18	-0.00381732	0.0736335	0.956439	0.966456	-0.640876	0.106775	7.98702e-10	4.33768e-09
YDR239C	YDR239C	23.1127	1.06639	0.088535	6.06143e-34	3.17179e-33	0.659284	0.0938047	5.77722e-13	2.46019e-12	0.375388	0.126404	0.00224279	0.00443873
YDR240C	SNU56	12.6603	-0.846261	0.118346	4.11336e-13	9.89819e-13	-0.815135	0.125794	1.13038e-11	4.37157e-11	-0.00708949	0.165191	0.963881	0.971865
YDR241W	BUD26
YDR246W	TRS23	24.0686	-0.195643	0.0812022	0.0138439	0.0179686	-0.332064	0.0854845	7.55579e-05	0.000156118	0.137608	0.115683	0.222742	0.280796
YDR247W	VHS1	4.63769	-0.771165	0.207545	0.000105256	0.000161041	-0.971695	0.224785	7.86006e-07	2.02454e-06	0.204179	0.268961	0.379746	0.443818
YDR248C	YDR248C	137.865	-1.39175	0.0672928	5.22653e-96	1.45193e-94	-0.815938	0.0679237	3.84812e-34	5.73542e-33	-0.55445	0.0945237	2.49848e-09	1.26618e-08
YDR249C	YDR249C	12.2667	-0.300214	0.134439	0.0215095	0.0273382	-0.433155	0.13734	0.000909171	0.00165321	0.140235	0.184106	0.416654	0.480915
YDR250C	YDR250C
YDR251W	PAM1	62.3409	0.724158	0.0771917	3.87515e-21	1.30716e-20	-0.355166	0.0780564	3.81376e-06	9.13168e-06	1.06527	0.110878	3.76851e-23	6.13366e-22
YDR252W	BTT1	8.42413	-0.573996	0.203425	0.00324175	0.00441384	-0.163618	0.194695	0.346079	0.403847	-0.319553	0.264605	0.166104	0.216921
YDR253C	MET32	327.623	-1.03078	0.176283	1.54067e-09	3.12016e-09	-0.815702	0.177032	4.83676e-07	1.27301e-06	-0.148533	0.228985	0.472836	0.536083
YDR254W	CHL4	24.4596	3.7381	0.18118	4.04412e-96	1.12937e-94	3.25702	0.184844	1.87101e-71	1.07908e-69	0.385437	0.235459	0.067755	0.0983338
YDR255C	RMD5	8.12089	2.08423	0.213961	1.46683e-24	5.52768e-24	1.12916	0.216227	4.18087e-09	1.34122e-08	0.731765	0.278674	0.0020201	0.00403569
YDR256C	CTA1	3.61597	1.23436	0.266871	6.03925e-07	1.06318e-06	-0.451058	0.250012	0.0325707	0.0470259	1.64793	0.408397	5.1459e-07	1.86122e-06
YDR257C	RKM4	38.5989	-0.272691	0.0849987	0.0012027	0.00169451	-0.443356	0.0881144	2.8269e-07	7.60239e-07	0.172868	0.120349	0.13988	0.186812
YDR258C	HSP78	44.0812	0.847034	0.113082	3.27287e-14	8.32096e-14	0.739417	0.113519	1.36549e-11	5.23126e-11	0.0833515	0.154522	0.572617	0.632059
YDR259C	YAP6	19.7418	-0.499458	0.128929	8.28517e-05	0.000127905	0.550291	0.129821	9.16602e-06	2.1045e-05	-1.01735	0.186089	3.49289e-09	1.72724e-08
YDR260C	SWM1	5.15785	-0.389735	0.167468	0.0159722	0.020575	-0.536473	0.174954	0.000867282	0.00158083	0.162055	0.22667	0.428592	0.492551
YDR261C	EXG2	54.8043	2.00039	0.0846774	2.04372e-125	9.59643e-124	1.09318	0.0864934	3.17241e-38	5.64859e-37	0.864397	0.119641	8.18594e-14	6.92737e-13
YDR262W	YDR262W	31.0517	1.45319	0.0949644	6.01196e-54	5.60624e-53	0.754651	0.0975147	1.74664e-15	8.99775e-15	0.65075	0.133703	4.47618e-07	1.63685e-06
YDR263C	DIN7	14.3967	0.322012	0.125472	0.0086932	0.0114542	-0.0993489	0.125732	0.398127	0.456551	0.397574	0.173599	0.0153295	0.0256588
YDR264C	AKR1	59.5663	0.43507	0.0705841	5.92172e-10	1.22641e-09	0.133353	0.0736927	0.0584966	0.0807448	0.289499	0.100227	0.00322107	0.00618791
YDR265W	PEX10	20.5072	1.36847	0.129918	6.75362e-27	2.76502e-26	0.910435	0.135372	1.24254e-12	5.13067e-12	0.392223	0.178161	0.019339	0.0318791
YDR266C	HEL2	26.0924	0.917768	0.0860612	6.25803e-27	2.5641e-26	0.795497	0.0910166	3.26358e-19	2.17e-18	0.104744	0.122323	0.378561	0.442726
YDR267C	CIA1	43.1526	-0.0880672	0.0663245	0.157977	0.182939	-0.307175	0.068742	6.12491e-06	1.42978e-05	0.214568	0.0939146	0.020072	0.0329014
YDR268W	MSW1	21.2531	0.371284	0.0989541	0.000151827	0.000230038	-0.103537	0.101117	0.276963	0.331356	0.458059	0.139432	0.000635417	0.00139955
YDR269C	YDR269C
YDR270W	CCC2	19.2156	-0.993702	0.122758	1.99316e-16	5.52835e-16	-0.0205546	0.119841	0.855315	0.88054	-0.916665	0.1755	2.39256e-08	1.04917e-07
YDR271C	YDR271C
YDR272W	GLO2	53.5324	2.15948	0.0787568	9.037e-168	8.87968e-166	1.55866	0.0812622	6.39015e-84	5.21633e-82	0.574315	0.110931	1.10434e-07	4.41901e-07
YDR273W	DON1	9.29643	0.123644	0.138392	0.348544	0.382973	-0.902296	0.150496	1.50741e-10	5.32156e-10	0.990392	0.205127	1.00016e-07	4.03256e-07
YDR274C	YDR274C
YDR275W	BSC2	21.1805	0.931629	0.125195	3.98077e-14	1.00725e-13	-0.0550981	0.12355	0.6344	0.687105	0.935798	0.179931	2.27438e-08	1.00232e-07
YDR276C	PMP3	464.273	0.354751	0.0591741	1.80509e-09	3.64592e-09	0.472228	0.0590505	6.97517e-16	3.69733e-15	-0.119387	0.0829279	0.144954	0.192957
YDR277C	MTH1	14.7091	0.974064	0.16958	3.28357e-09	6.55971e-09	0.468381	0.167934	0.00260548	0.00445958	0.407616	0.226212	0.0461221	0.0695634
YDR278C	YDR278C
YDR279W	RNH202	7.73309	0.527796	0.149719	0.000314388	0.000465441	0.262177	0.15601	0.069335	0.094428	0.215352	0.206379	0.25712	0.317718
YDR280W	RRP45	44.5386	0.176351	0.0641231	0.00528825	0.00707679	0.479667	0.0684835	1.32605e-12	5.45722e-12	-0.301919	0.092642	0.000941103	0.00201188
YDR281C	PHM6	4.75517	3.13044	0.278668	1.78793e-31	8.53128e-31	0.592862	0.26999	0.00785931	0.0125117	2.14547	0.415847	1.78025e-09	9.20662e-09
YDR282C	MRX10	15.2449	-0.0525786	0.11712	0.638706	0.669626	-0.704084	0.124501	3.4116e-09	1.09909e-08	0.626709	0.168827	8.07964e-05	0.00020811
YDR283C	GCN2	75.9095	-0.0159004	0.0540413	0.753579	0.777161	-0.925295	0.0599744	6.86427e-55	2.30518e-53	0.899942	0.0825059	1.44131e-28	3.39293e-27
YDR284C	DPP1	75.2844	1.01895	0.0726624	3.74664e-45	2.7084e-44	0.199875	0.073638	0.00555452	0.00903227	0.796143	0.103041	2.54111e-15	2.42067e-14
YDR285W	ZIP1	8.57243	-0.0590188	0.177285	0.726213	0.752008	-0.59361	0.183924	0.000404893	0.000769747	0.497435	0.244242	0.0216881	0.0353647
YDR286C	MGP12	30.7627	-0.302916	0.0822565	0.000208732	0.000312509	-0.268714	0.0850467	0.00125899	0.00224093	-0.0272061	0.116502	0.810703	0.841963
YDR287W	INM2	25.9535	0.20709	0.0898573	0.0182649	0.0233753	-0.356351	0.0912774	6.64362e-05	0.000138185	0.550755	0.126058	6.43416e-06	1.97339e-05
YDR288W	NSE3	26.3583	-0.131522	0.0907395	0.128414	0.150612	-0.276407	0.093231	0.00235821	0.00405861	0.142409	0.126881	0.246838	0.306943
YDR289C	RTT103	21.2006	-0.846269	0.0860937	4.04426e-23	1.46277e-22	-0.74151	0.0916746	1.13019e-16	6.40001e-16	-0.0875609	0.122929	0.464819	0.528688
YDR290W	YDR290W
YDR291W	HRQ1	22.3879	0.8981	0.104008	2.54165e-18	7.64945e-18	0.0952031	0.104995	0.335299	0.392997	0.757822	0.147635	7.534e-08	3.08214e-07
YDR292C	SRP101	42.743	-0.0776622	0.0643733	0.197794	0.225358	-0.10905	0.0683018	0.0926685	0.123264	0.030871	0.091627	0.732094	0.775657
YDR293C	SSD1	59.364	-0.0891691	0.069533	0.173159	0.199388	-0.548998	0.0700368	1.95962e-15	1.00364e-14	0.451475	0.097074	2.05919e-06	6.83304e-06
YDR294C	DPL1	85.8939	1.09121	0.0576509	1.86319e-80	3.59493e-79	0.497495	0.0594609	3.01623e-17	1.76841e-16	0.578341	0.0823627	1.0827e-12	8.21859e-12
YDR295C	HDA2	16.7813	0.42032	0.0990002	1.82798e-05	2.95079e-05	0.211994	0.10467	0.0342196	0.0492324	0.188827	0.140528	0.16364	0.214441
YDR296W	MHR1	64.1226	-0.0774213	0.0544245	0.127682	0.149818	0.219511	0.0552695	6.25457e-05	0.0001304	-0.297564	0.076252	7.85126e-05	0.000202621
YDR297W	SUR2	42.8337	0.867847	0.0807473	2.81355e-27	1.16631e-26	0.013018	0.0809659	0.865467	0.889266	0.829123	0.116513	2.07458e-13	1.69872e-12
YDR298C	ATP5	131.738	-1.51493	0.0706251	2.90792e-103	9.4659e-102	-0.691134	0.0708257	4.13233e-23	3.46933e-22	-0.795934	0.0994705	3.42798e-16	3.43835e-15
YDR299W	BFR2	18.7264	-0.401609	0.128066	0.00141757	0.00198774	0.245912	0.132911	0.0492986	0.0690909	-0.612931	0.18093	0.000304198	0.000710108
YDR300C	PRO1	17.9832	-0.606378	0.120923	3.67235e-07	6.54974e-07	-0.0637696	0.121579	0.576066	0.633494	-0.498083	0.169641	0.00194764	0.00390411
YDR301W	CFT1	39.3251	0.715151	0.0721079	2.10251e-23	7.71503e-23	-0.0281325	0.0730681	0.684171	0.733821	0.727423	0.104081	8.5478e-13	6.54468e-12
YDR302W	GPI11	37.132	-0.525536	0.070186	5.37102e-14	1.34937e-13	-0.774025	0.0736751	1.29143e-26	1.30025e-25	0.249411	0.100294	0.0113034	0.0194727
YDR303C	RSC3	29.2489	0.706201	0.0839938	2.5484e-17	7.35279e-17	0.492065	0.0869095	7.62755e-09	2.38772e-08	0.19608	0.11887	0.0898335	0.127068
YDR304C	CPR5	189.148	0.431691	0.0372292	3.64744e-31	1.72029e-30	0.110929	0.0387279	0.0036527	0.00609282	0.317527	0.0533457	2.19049e-09	1.11543e-08
YDR305C	HNT2	32.1285	-0.436056	0.079895	4.0099e-08	7.57981e-08	-0.40064	0.0827089	8.21713e-07	2.11343e-06	-0.0266588	0.113349	0.809554	0.841264
YDR306C	PFU1	15.3484	0.523992	0.125955	2.4069e-05	3.8525e-05	-0.27098	0.128388	0.0259187	0.0380323	0.756418	0.178509	5.46766e-06	1.69064e-05
YDR307W	PMT7	22.9013	0.885935	0.094368	2.71833e-21	9.21626e-21	0.211865	0.0977391	0.0242004	0.0357381	0.637563	0.134037	8.0987e-07	2.85147e-06
YDR308C	SRB7	30.6401	-0.242797	0.0765064	0.00136922	0.001923	-0.176828	0.0806955	0.0233799	0.034681	-0.0594319	0.109063	0.577422	0.636701
YDR309C	GIC2	23.8251	0.982677	0.103946	1.1754e-21	4.04717e-21	0.612371	0.108321	5.2213e-09	1.65596e-08	0.331506	0.146182	0.0181379	0.0300654
YDR310C	SUM1	38.9933	1.12199	0.0758094	3.70638e-50	3.1068e-49	0.705784	0.0794745	1.49831e-19	1.01793e-18	0.392619	0.108153	0.000205133	0.000496549
YDR311W	TFB1	34.6178	0.59865	0.0840799	7.6027e-13	1.80573e-12	0.20478	0.087567	0.0157276	0.024063	0.373449	0.119343	0.00129	0.00268105
YDR312W	SSF2	35.605	0.589415	0.0948497	3.66532e-10	7.68703e-10	0.767574	0.100383	3.35431e-15	1.68382e-14	-0.183472	0.13446	0.158336	0.208521
YDR313C	PIB1	13.2618	0.762795	0.131976	4.10916e-09	8.16906e-09	0.474711	0.134841	0.000219959	0.000432816	0.24074	0.181575	0.158447	0.208615
[truncated: 5,426 more rows]

## Sheet: YPD_to_Low_N.960
ORF	GeneName	baseMean	log2FoldChange_sp	lfcSE_sp	pvalue_sp	padj_sp	log2FoldChange_cis	lfcSE_cis	pvalue_cis	padj_cis	log2FoldChange_trans	lfcSE_trans	pvalue_trans	padj_trans
[truncated: 6,650 more rows]

[truncated: 3 more sheets: CellCycle, Growth_curve, SC_to_No_Pi]
