# Supplementary material for: Independent evolution of transcript abundance and gene regulatory dynamics
Source: HighWire-hosted journal article supplement (doi:10.1101/gr.261537.120), 2020-07-01
Supplement: Supplemental_Table_S7.xlsx [file Supplemental_Table_S7.xlsx]

## Sheet: description
Table S7	results of Rc, comparative and control measures

## Sheet: comparative
ORF	GeneName	bw_cer_par	bw_hyc_hyp	bw_cer_hyc	bw_par_hyp
YAL001C	TFC3	0.765442	0.882706	0.91131	0.811975
YAL002W	VPS8	0.795769	0.900884	0.915567	0.881964
YAL003W	EFB1	0.876729	0.945847	0.96686	0.951342
YAL004W	YAL004W
YAL005C	SSA1	0.564232	0.818542	0.81681	0.716698
YAL007C	ERP2	0.271384	0.785844	0.85582	0.334921
YAL008W	FUN14	0.742177	0.923304	0.929215	0.849684
YAL009W	SPO7	0.666716	0.807215	0.845412	0.774794
YAL010C	MDM10	0.573194	0.584337	0.734614	0.534035
YAL011W	SWC3	0.114897	0.420959	0.242343	0.401691
YAL012W	CYS3	0.546876	0.738005	0.820797	0.762395
YAL013W	DEP1	0.662342	0.869603	0.775195	0.816632
YAL014C	SYN8	0.623252	0.825201	0.81096	0.777118
YAL015C	NTG1	0.643335	0.792385	0.82998	0.738534
YAL016W	TPD3	0.363044	0.667295	0.482082	0.587507
YAL017W	PSK1	0.782674	0.92392	0.943878	0.849017
YAL018C	LDS1	0.3904	-0.172969	0.833162	0.049829
YAL019W	FUN30	0.723111	0.904977	0.931517	0.796895
YAL020C	ATS1
YAL021C	CCR4	0.182261	0.443603	0.474056	0.228452
YAL022C	FUN26	0.508211	0.779033	0.544053	0.808596
YAL023C	PMT2	0.413125	0.910178	0.949362	0.484765
YAL024C	LTE1	0.401781	0.432414	0.397946	0.485477
YAL025C	MAK16	0.863712	0.937707	0.953375	0.934345
YAL026C	DRS2	0.20043	0.183131	0.479922	0.515854
YAL027W	SAW1	0.597588	0.820543	0.797899	0.692925
YAL028W	FRT2	0.844428	0.926508	0.939627	0.919611
YAL029C	MYO4	0.32399	0.831229	0.83516	0.293605
YAL030W	SNC1	0.706807	0.914709	0.920642	0.791496
YAL031C	GIP4	0.745997	0.902374	0.87579	0.850234
YAL032C	PRP45	0.359124	-0.347196	0.724647	0.326655
YAL033W	POP5	0.450763	0.518544	0.547695	0.41919
YAL034C	FUN19	0.80268	0.904663	0.928854	0.886157
YAL035W	FUN12	0.860734	0.936547	0.955881	0.946412
YAL036C	RBG1	0.870372	0.933469	0.962586	0.947605
YAL037W	YAL037W	0.685965	0.611494	0.627992	0.797921
YAL038W	CDC19	0.835546	0.938248	0.951392	0.920449
YAL039C	CYC3	0.498535	0.709806	0.689149	0.587752
YAL040C	CLN3	0.541865	0.814751	0.645434	0.545748
YAL041W	CDC24	0.474123	0.0497379	0.481493	0.266491
YAL042W	ERV46	0.367632	0.871221	0.927126	0.440062
YAL043C	PTA1	0.519802	0.474877	0.63147	0.581319
YAL044C	GCV3	0.78921	0.918148	0.912585	0.869771
YAL045C	YAL045C
YAL046C	BOL3	0.407338	0.767508	0.545656	0.674413
YAL047C	SPC72	0.527001	0.632124	0.563778	0.558572
YAL048C	GEM1
YAL049C	AIM2	0.573414	0.864053	0.912302	0.683402
YAL051W	OAF1	0.632183	0.701392	0.723879	0.71875
YAL053W	FLC2	0.591759	0.713761	0.715907	0.734994
YAL054C	ACS1	0.834141	0.916576	0.92416	0.917117
YAL055W	PEX22	0.668597	0.879969	0.918775	0.772009
YAL056W	GPB2	0.785418	0.922578	0.93378	0.847032
YAL058W	CNE1	0.287211	0.454299	0.481737	0.549965
YAL059W	ECM1	0.856296	0.922258	0.948392	0.93362
YAL060W	BDH1	0.828719	0.929599	0.94522	0.895397
YAL061W	BDH2	0.846208	0.93513	0.96022	0.927883
YAL062W	GDH3	0.777414	0.935246	0.952833	0.861322
YAL063C	FLO9
YAL064W	YAL064W
YAL065C	YAL065C
YAL066W	YAL066W
YAL067C	SEO1	0.766931	0.923361	0.910209	0.859909
YAL068C	PAU8
YAL069W	YAL069W
YAR002W	NUP60	0.213025	0.702547	0.803409	0.353521
YAR003W	SWD1	0.445814	0.864305	0.74204	0.685035
YAR007C	RFA1	0.128213	0.526656	0.24533	0.559957
YAR008W	SEN34	-0.177449	-0.100711	0.751702	0.673721
YAR009C	YAR009C
YAR010C	YAR010C
YAR014C	BUD14	0.47224	0.367213	0.408911	0.113817
YAR015W	ADE1	0.412108	0.764815	0.424861	0.756154
YAR018C	KIN3	0.506831	0.716913	0.584836	0.720161
YAR019C	CDC15	0.697619	0.856356	0.867017	0.72591
YAR020C	PAU7
YAR023C	YAR023C
YAR027W	UIP3	0.62873	0.848065	0.933708	0.748481
YAR028W	YAR028W
YAR029W	YAR029W
YAR030C	YAR030C
YAR031W	PRM9
YAR033W	MST28	0.342745	0.523318	0.597547	0.492676
YAR035W	YAT1	0.710709	0.884567	0.902894	0.86917
YAR042W	SWH1	0.525556	0.389432	0.658402	0.387963
YAR047C	YAR047C
YAR050W	FLO1	-0.549431	-0.763435	-0.685523	-0.668924
YAR053W	YAR053W
YAR060C	YAR060C
YAR061W	YAR061W
YAR062W	YAR062W
YAR064W	YAR064W
YAR066W	YAR066W
YAR068W	YAR068W
YAR069C	YAR069C
YAR070C	YAR070C
YAR071W	PHO11
YAR073W	IMD1
YAR075W	YAR075W
YBL001C	ECM15	0.641894	0.88466	0.920084	0.750076
YBL002W	HTB2	0.255684	0.838983	0.872518	0.523035
YBL003C	HTA2	0.384505	0.855625	0.865145	0.603653
YBL004W	UTP20	0.832422	0.927152	0.943671	0.914961
YBL005W	PDR3
YBL006C	LDB7	0.688507	0.860159	0.812902	0.829376
YBL007C	SLA1	0.444865	0.705664	0.554745	0.815713
YBL008W	HIR1	-0.0633085	0.121723	0.618688	0.537689
YBL009W	ALK2	-0.259761	0.40383	0.831853	0.399257
YBL010C	LAA2	0.425144	0.421365	0.472749	0.808335
YBL011W	SCT1	0.27755	0.147435	0.32478	0.343243
YBL012C	YBL012C
YBL013W	FMT1
YBL014C	RRN6	0.573421	0.737024	0.638601	0.81999
YBL015W	ACH1	0.84373	0.924697	0.94496	0.913117
YBL016W	FUS3	0.687973	0.867927	0.874748	0.788592
YBL017C	PEP1	0.604013	0.829719	0.683526	0.816059
YBL018C	POP8	0.53178	0.707393	0.838401	0.658836
YBL019W	APN2	0.48482	0.79653	0.906783	0.597232
YBL020W	RFT1	0.378373	0.45002	0.468197	0.438619
YBL021C	HAP3	0.606275	0.749028	0.65395	0.766119
YBL022C	PIM1	0.504953	0.55975	0.543421	0.575727
YBL023C	MCM2	0.048062	0.230804	0.46843	0.623011
YBL024W	NCL1	0.859075	0.936996	0.95672	0.949006
YBL025W	RRN10	0.657444	0.787992	0.771841	0.695871
YBL026W	LSM2	0.223017	0.462537	0.498737	0.540802
YBL027W	RPL19B
YBL028C	YBL028C	0.867737	0.927538	0.94869	0.94195
YBL029W	YBL029W	0.750427	0.882967	0.898004	0.820879
YBL030C	PET9	0.330693	0.649453	0.617473	0.577178
YBL031W	SHE1	0.303326	0.354834	0.135007	0.391078
YBL032W	HEK2	0.553016	0.758811	0.81596	0.612417
YBL033C	RIB1	0.758261	0.852696	0.865455	0.811367
YBL034C	STU1	0.224444	0.488148	0.374662	0.451481
YBL035C	POL12	-0.167944	0.479529	0.552096	0.516211
YBL036C	YBL036C	0.165914	0.713169	0.786932	0.252805
YBL037W	APL3	0.511196	0.689282	0.543722	0.810569
YBL038W	MRPL16	0.0250512	0.622087	0.718667	0.261242
YBL039C	URA7	0.861403	0.94092	0.964122	0.944777
YBL040C	ERD2	-0.07891	0.434129	0.0475302	0.420399
YBL041W	PRE7	0.413928	0.530252	0.436318	0.572127
YBL042C	FUI1	0.716443	0.888775	0.864603	0.924631
YBL043W	ECM13	0.800012	0.888187	0.894971	0.860152
YBL044W	YBL044W
YBL045C	COR1	0.655302	0.916655	0.919688	0.749568
YBL046W	PSY4	0.530644	0.357654	0.491383	0.602922
YBL047C	EDE1	0.791432	0.840362	0.897988	0.801889
YBL048W	RRT1
YBL049W	MOH1	0.829504	0.935719	0.948842	0.911361
YBL050W	SEC17	0.787194	0.9086	0.921488	0.874262
YBL051C	PIN4	0.363732	0.559293	0.63131	0.553633
YBL052C	SAS3	0.539339	0.602082	0.591147	0.716911
YBL053W	YBL053W
YBL054W	TOD6	0.841088	0.924393	0.924921	0.921802
YBL055C	YBL055C	0.353892	-0.048848	0.625715	0.161367
YBL056W	PTC3	0.32488	0.618224	0.703386	0.431757
YBL057C	PTH2	0.589296	0.671309	0.653301	0.7134
YBL058W	SHP1	0.422093	0.788636	0.56106	0.336081
YBL059W	IAI11	0.729215	0.865942	0.843941	0.861876
YBL060W	YEL1	0.625211	0.635038	0.808602	0.568149
YBL061C	SKT5	0.504436	0.583967	0.705439	0.559361
YBL062W	YBL062W
YBL063W	KIP1	0.364431	0.650625	0.392301	0.711115
YBL064C	PRX1	0.76923	0.936713	0.96187	0.833126
YBL065W	YBL065W
YBL066C	SEF1	0.584284	0.756621	0.675736	0.62305
YBL067C	UBP13	0.587516	0.679597	0.632695	0.756183
YBL068W	PRS4	0.782662	0.91861	0.92472	0.901809
YBL069W	AST1	0.371812	0.6819	0.658833	0.627294
YBL070C	YBL070C
YBL071C	YBL071C
YBL072C	RPS8A	0.845805	0.940814	0.968125	0.929941
YBL073W	YBL073W
YBL074C	AAR2
YBL075C	SSA3	0.75983	0.915926	0.902169	0.874585
YBL076C	ILS1	0.854616	0.942313	0.944655	0.94953
YBL077W	YBL077W
YBL078C	ATG8	0.846725	0.941218	0.956559	0.919645
YBL079W	NUP170	0.41397	0.738776	0.742037	0.448061
YBL080C	PET112	0.681182	0.556966	0.860432	0.620902
YBL081W	YBL081W	0.794111	0.921553	0.944994	0.869533
YBL082C	ALG3	0.609265	0.880565	0.906103	0.71268
YBL083C	YBL083C
YBL084C	CDC27	0.735106	0.77321	0.80261	0.825018
YBL085W	BOI1	0.462842	0.496918	0.544192	0.533649
YBL086C	YBL086C	0.628163	0.765515	0.869227	0.726174
YBL087C	RPL23A
YBL088C	TEL1	0.628837	0.708687	0.735387	0.727164
YBL089W	AVT5	0.754288	0.877223	0.873609	0.860465
YBL090W	MRP21	0.248583	0.468043	0.460299	0.196114
YBL091C	MAP2	0.564402	0.578621	0.654454	0.662411
YBL092W	RPL32	0.85566	0.943558	0.967511	0.934481
YBL093C	ROX3	-0.0310565	0.549048	0.315145	0.799893
YBL094C	YBL094C
YBL095W	MRX3	0.804492	0.914458	0.891908	0.881425
YBL096C	YBL096C
YBL097W	BRN1
YBL098W	BNA4
YBL099W	ATP1	0.423683	0.867177	0.892658	0.553809
YBL100C	YBL100C
YBL101C	ECM21	0.792473	0.903223	0.923044	0.863895
YBL102W	SFT2	0.767298	0.895114	0.941319	0.834719
YBL103C	RTG3	0.786388	0.875467	0.871836	0.844428
YBL104C	SEA4	0.515774	0.529208	0.611546	0.500041
YBL105C	PKC1	0.518902	0.759592	0.535423	0.748383
YBL106C	SRO77	0.696369	0.807294	0.809945	0.77116
YBL107C	MIX23	0.584316	0.784082	0.63936	0.875953
YBL108W	YBL108W
YBL109W	YBL109W
YBL111C	YBL111C
YBL112C	YBL112C
YBL113C	YBL113C
YBR001C	NTH2	0.842641	0.935795	0.953545	0.909613
YBR002C	RER2	0.73004	0.849461	0.874382	0.837848
YBR003W	COQ1	0.16383	0.822353	0.844483	0.165965
YBR004C	GPI18	0.561053	0.772339	0.781063	0.693219
YBR005W	RCR1	0.643749	0.862298	0.886403	0.730082
YBR006W	UGA2	0.807251	0.924727	0.951324	0.885379
YBR007C	DSF2	0.293525	0.671598	0.80951	0.372932
YBR008C	FLR1	-0.261177	0.264555	0.633551	0.678337
YBR009C	HHF1	0.447168	0.605049	0.761412	0.690077
YBR010W	HHT1	0.360598	0.61688	0.743696	0.643978
YBR011C	IPP1	0.5546	0.824755	0.770775	0.749411
YBR012C	YBR012C
YBR013C	YBR013C
YBR014C	GRX7	0.607748	0.760493	0.809143	0.748637
YBR015C	MNN2	0.586847	0.66017	0.662172	0.757643
YBR016W	YBR016W	0.744003	0.836991	0.865971	0.823992
YBR017C	KAP104	0.794663	0.844019	0.866573	0.863526
YBR018C	GAL7	0.61252	0.868606	0.911603	0.741341
YBR019C	GAL10	0.448208	0.819369	0.886754	0.637036
YBR020W	GAL1	0.744224	0.761337	0.846062	0.774118
YBR021W	FUR4	0.557914	0.874399	0.852563	0.590878
YBR022W	POA1	0.657532	0.824847	0.879217	0.82433
YBR023C	CHS3	0.664211	0.706378	0.86346	0.69326
YBR024W	SCO2	0.547945	0.806173	0.87823	0.566979
YBR025C	OLA1	0.869833	0.93661	0.960594	0.948427
YBR026C	ETR1	0.812599	0.93231	0.949791	0.889
YBR027C	YBR027C
YBR028C	YPK3	0.473558	0.571559	0.554958	0.564178
YBR029C	CDS1	0.69227	0.757461	0.738817	0.826171
YBR030W	RKM3	0.416082	0.569039	0.629221	0.71807
YBR031W	RPL4A
YBR032W	YBR032W
YBR033W	EDS1	0.734139	0.898785	0.938132	0.793628
YBR034C	HMT1	0.853892	0.931249	0.914284	0.948371
YBR035C	PDX3	0.780189	0.916265	0.920738	0.877971
YBR036C	CSG2	0.505114	0.777867	0.608802	0.848258
YBR037C	SCO1	-0.203473	0.726282	0.897899	0.0950458
YBR038W	CHS2	0.272328	0.536789	0.409814	0.652119
YBR039W	ATP3	0.654727	0.870533	0.798432	0.796439
YBR040W	FIG1
YBR041W	FAT1	0.0653437	0.468157	0.27821	0.346194
YBR042C	CST26	0.654047	0.758785	0.810444	0.730889
YBR043C	QDR3	0.81831	0.921553	0.916272	0.881435
YBR044C	TCM62	0.67139	0.704475	0.682491	0.784324
YBR045C	GIP1
YBR046C	ZTA1	0.818831	0.926405	0.94869	0.901835
YBR047W	FMP23	0.810172	0.91548	0.937049	0.90226
YBR048W	RPS11B
YBR049C	REB1	0.482071	0.518883	0.495837	0.609228
YBR050C	REG2	0.823911	0.918392	0.935827	0.908941
YBR051W	YBR051W
YBR052C	RFS1	0.851733	0.932383	0.951861	0.930182
YBR053C	YBR053C	0.838582	0.935638	0.953586	0.918572
YBR054W	YRO2	0.751672	0.894163	0.892998	0.867272
YBR055C	PRP6	0.284297	-0.451883	0.250348	0.561297
YBR056W	YBR056W	0.830498	0.93153	0.956936	0.916548
YBR057C	MUM2	0.722384	0.829707	0.8001	0.814529
YBR058C	UBP14	0.0346279	-0.0760185	0.609552	0.806151
YBR059C	AKL1	0.646034	0.855991	0.834171	0.73872
YBR060C	ORC2	0.33943	-0.00278475	0.653764	0.567067
YBR061C	TRM7	0.831182	0.90533	0.914999	0.937436
YBR062C	YBR062C	0.0963689	0.784512	0.895659	0.182206
YBR063C	YBR063C	0.695107	0.749522	0.811529	0.788913
YBR064W	YBR064W
YBR065C	ECM2
YBR066C	NRG2	0.759911	0.896399	0.896653	0.895495
YBR067C	TIP1	0.731404	0.829812	0.905599	0.838534
YBR068C	BAP2	0.701457	0.909106	0.909109	0.888319
YBR069C	TAT1	0.822898	0.932331	0.949725	0.901021
YBR070C	ALG14	-0.126987	0.674022	0.00775873	0.655752
YBR071W	YBR071W	0.370204	0.774356	0.31963	0.738255
YBR072W	HSP26	0.649516	0.92338	0.949606	0.741259
YBR073W	RDH54	0.405208	0.589523	0.443487	0.599941
YBR074W	PFF1	0.368757	0.58121	0.671699	0.516446
YBR076W	ECM8	0.700281	0.755955	0.788124	0.824282
YBR077C	SLM4	0.705822	0.900574	0.924624	0.84701
YBR078W	ECM33	0.66779	0.826144	0.92196	0.680457
YBR079C	RPG1	0.834942	0.935067	0.961789	0.929496
YBR080C	SEC18	0.43195	0.648722	0.695642	0.443187
YBR081C	SPT7	0.579499	0.537037	0.565553	0.630594
YBR082C	UBC4	0.852752	0.936939	0.959661	0.920551
YBR083W	TEC1	-0.0429385	-0.171648	0.725334	0.637009
YBR084W	MIS1	0.869891	0.938897	0.962795	0.950633
YBR085W	AAC3	0.771293	0.867758	0.864344	0.886876
YBR086C	IST2	0.254498	0.495229	0.603985	0.468707
YBR087W	RFC5	0.548561	0.655346	0.782399	0.565796
YBR088C	POL30	0.729176	0.863711	0.884867	0.840288
YBR089W	YBR089W
YBR090C	YBR090C
YBR091C	TIM12	0.694914	0.770198	0.782818	0.772054
YBR092C	PHO3	0.839038	0.900892	0.948359	0.85089
YBR093C	PHO5	0.0902203	0.855698	0.199695	0.876163
YBR094W	PBY1	0.141272	0.581544	0.544298	0.557863
YBR095C	RXT2	0.686765	0.828569	0.727827	0.837953
YBR096W	YBR096W	-0.131296	0.707955	0.0953794	0.759178
YBR097W	VPS15	0.762171	0.850972	0.897751	0.822408
YBR098W	MMS4	0.705364	0.780729	0.805518	0.766684
YBR099C	YBR099C
YBR101C	FES1	0.622978	0.869628	0.754549	0.855608
YBR102C	EXO84	0.716755	0.770834	0.800735	0.758594
YBR103W	SIF2	0.747769	0.762776	0.899665	0.807847
YBR104W	YMC2	0.506741	0.782757	0.743986	0.254087
YBR105C	VID24	0.789145	0.876645	0.896392	0.868128
YBR106W	SND3	0.862892	0.940137	0.960535	0.92847
YBR107C	IML3	0.76618	0.876643	0.845232	0.896754
YBR108W	AIM3	0.782517	0.839869	0.881855	0.817035
YBR109C	CMD1	0.415584	0.66333	0.783009	0.459745
YBR110W	ALG1	0.185553	0.738589	0.305275	0.7497
YBR111C	YSA1	0.763844	0.88128	0.906201	0.839087
YBR112C	CYC8	0.397858	0.62084	0.649853	0.423925
YBR113W	YBR113W
YBR114W	RAD16	0.816878	0.798335	0.8342	0.872166
YBR115C	LYS2	0.745485	0.885356	0.840667	0.883837
YBR116C	YBR116C
YBR117C	TKL2	0.827996	0.903272	0.926884	0.926368
YBR118W	TEF2	0.802754	0.929782	0.955358	0.895522
YBR119W	MUD1	0.210049	0.356327	0.837522	0.37698
YBR120C	CBP6	-0.138322	0.473985	0.875859	0.345389
YBR121C	GRS1	0.8625	0.943582	0.965364	0.949465
YBR122C	MRPL36	-0.270123	0.1134	0.511457	0.63912
YBR123C	TFC1	0.449066	0.686972	0.6473	0.582388
YBR124W	YBR124W
YBR125C	PTC4	0.329356	0.450037	0.480664	0.380786
YBR126C	TPS1	0.865979	0.934927	0.961598	0.93103
YBR127C	VMA2	0.302415	0.581855	0.128776	0.454509
YBR128C	ATG14	0.815484	0.925804	0.955627	0.903688
YBR129C	OPY1	0.616649	0.729835	0.858456	0.707198
YBR130C	SHE3	0.577935	0.438651	0.843951	0.40277
YBR131W	CCZ1	0.71808	0.80815	0.953367	0.779637
YBR132C	AGP2	0.843456	0.930866	0.953881	0.917837
YBR133C	HSL7	0.609777	0.707601	0.62768	0.764319
YBR134W	YBR134W
YBR135W	CKS1	0.439374	0.213035	0.809626	0.307048
YBR136W	MEC1	0.699746	0.787928	0.806951	0.772795
YBR137W	YBR137W	0.796355	0.881896	0.939605	0.850153
YBR138C	YBR138C	0.80597	0.903254	0.929611	0.882113
YBR139W	ATG42	0.828079	0.935411	0.951064	0.89699
YBR140C	IRA1	0.720775	0.84272	0.889595	0.789713
YBR141C	BMT2	0.827798	0.918844	0.911625	0.928331
YBR142W	MAK5	0.877059	0.934248	0.951711	0.953355
YBR143C	SUP45	0.864029	0.924599	0.963657	0.938076
YBR144C	YBR144C
YBR145W	ADH5	0.374877	0.848914	0.934391	0.516031
YBR146W	MRPS9	0.273381	0.46694	0.3164	0.339838
YBR147W	RTC2	0.817625	0.932615	0.954	0.899089
YBR148W	YSW1	0.73234	0.874215	0.917469	0.777013
YBR149W	ARA1	0.844535	0.934284	0.958769	0.918297
YBR150C	TBS1	0.768144	0.898075	0.884574	0.873843
YBR151W	APD1	0.473205	0.530267	0.292799	0.224621
YBR152W	SPP381
YBR153W	RIB7	0.497452	0.378722	0.562679	0.53242
YBR154C	RPB5	0.853891	0.943219	0.942476	0.954552
YBR155W	CNS1	0.820646	0.925498	0.951466	0.926033
YBR156C	SLI15	0.406986	0.458873	0.584972	0.65449
YBR157C	ICS2
YBR158W	AMN1	0.435841	0.519461	0.58027	0.555595
YBR159W	IFA38	0.00929058	0.462176	0.403101	0.366538
YBR160W	CDC28	0.0977875	0.53527	0.431503	0.450085
YBR161W	CSH1	0.452888	0.742367	0.72978	0.537841
YBR162C	TOS1	0.278257	0.710766	0.692031	0.493242
YBR163W	EXO5	0.621131	0.795048	0.755182	0.77972
YBR164C	ARL1
YBR165W	UBS1	0.367835	0.499647	0.774101	0.335123
YBR166C	TYR1	0.0167294	0.0588722	0.583403	0.673391
YBR167C	POP7	0.307875	0.391249	0.543108	0.358089
YBR168W	PEX32	0.773187	0.870777	0.866286	0.858436
YBR169C	SSE2	0.852811	0.915014	0.955982	0.933285
YBR170C	NPL4	0.322591	0.860435	0.854527	0.330147
YBR171W	SEC66	0.728179	0.719742	0.924933	0.643725
YBR172C	SMY2	0.674752	0.780918	0.803831	0.758098
YBR173C	UMP1	0.017817	0.338333	0.396765	0.565573
YBR174C	YBR174C
YBR175W	SWD3	0.307583	0.552328	0.418505	0.259021
YBR176W	ECM31	0.144387	0.413516	0.239123	0.222001
YBR177C	EHT1	0.805291	0.924903	0.934733	0.881081
YBR178W	YBR178W
YBR179C	FZO1	0.517377	0.58836	0.679497	0.435286
YBR180W	DTR1	-0.66088	-0.685721	0.811259	0.875192
YBR181C	RPS6B
YBR182C	SMP1	0.730095	0.716276	0.782867	0.77739
YBR183W	YPC1	0.824558	0.922634	0.95232	0.9081
YBR184W	YBR184W	0.623185	0.826155	0.783498	0.668484
YBR185C	MBA1	0.0143358	0.233162	0.399763	0.627982
YBR186W	PCH2
YBR187W	GDT1	0.776842	0.901531	0.938556	0.865798
YBR188C	NTC20	0.423405	0.559964	0.592723	0.528319
YBR189W	RPS9B
YBR190W	YBR190W
YBR191W	RPL21A	0.840553	0.942768	0.966444	0.921987
YBR192W	RIM2	0.697199	0.895126	0.860967	0.8904
YBR193C	MED8	0.624959	0.787292	0.727124	0.736193
YBR194W	AIM4	0.592783	0.707353	0.730783	0.680544
YBR195C	MSI1	0.182408	0.532945	0.467288	0.197281
YBR196C	PGI1	0.790999	0.902349	0.921674	0.878038
YBR197C	YBR197C
YBR198C	TAF5	0.345104	0.519717	0.525628	0.454064
YBR199W	KTR4	0.749767	0.900621	0.882146	0.876343
YBR200W	BEM1	0.559005	0.664534	0.777883	0.554048
YBR201W	DER1	0.763857	0.867797	0.859565	0.865806
YBR202W	MCM7	0.600341	0.819661	0.615474	0.774959
YBR203W	COS111	0.248139	0.846294	0.908851	0.403636
YBR204C	LDH1	0.797197	0.904738	0.936126	0.869741
YBR205W	KTR3	0.714743	0.880655	0.791904	0.879746
YBR206W	YBR206W
YBR207W	FTH1	0.687576	0.789106	0.758677	0.778997
YBR208C	DUR1,2	0.808047	0.912891	0.920745	0.881156
YBR209W	YBR209W
YBR210W	ERV15	0.577648	0.262564	0.798375	0.475289
YBR211C	AME1	0.707558	0.872417	0.886856	0.783889
YBR212W	NGR1	0.7826	0.883672	0.912063	0.815848
YBR213W	MET8	0.746311	0.913115	0.854477	0.873206
YBR214W	SDS24	0.839631	0.933898	0.956378	0.918539
YBR215W	HPC2	0.48294	0.530139	0.444656	0.635406
YBR216C	YBP1	0.757017	0.863774	0.905519	0.828405
YBR217W	ATG12	0.623028	0.829974	0.9006	0.718841
YBR218C	PYC2	0.63198	0.797263	0.894516	0.746767
YBR219C	YBR219C
YBR220C	YBR220C	0.129909	-0.0781176	0.652687	0.374837
YBR221C	PDB1	0.293104	0.836901	0.245119	0.791935
YBR222C	PCS60	0.690856	0.878674	0.831059	0.91783
YBR223C	TDP1	0.814445	0.904535	0.928831	0.890641
YBR224W	YBR224W
YBR225W	YBR225W	0.662924	0.889725	0.78222	0.850345
YBR226C	YBR226C
YBR227C	MCX1	0.336859	0.467462	0.572617	0.758112
YBR228W	SLX1	0.767379	0.878429	0.880937	0.853759
YBR229C	ROT2	0.198117	0.587815	0.543574	0.315541
YBR230C	OM14	0.821654	0.933138	0.957687	0.871319
YBR231C	SWC5	0.668897	0.806679	0.782814	0.769709
YBR232C	YBR232C
YBR233W	PBP2	0.58	0.737671	0.640996	0.789864
YBR234C	ARC40	0.745673	0.865516	0.878655	0.828698
YBR235W	VHC1	0.797329	0.903278	0.896713	0.876914
YBR236C	ABD1	0.66262	0.771676	0.73317	0.754807
YBR237W	PRP5	0.505275	0.394187	0.832098	0.439249
YBR238C	YBR238C	0.742414	0.907063	0.883405	0.869919
YBR239C	ERT1	0.34167	0.349607	0.546732	0.524561
YBR240C	THI2
YBR241C	YBR241C	0.806132	0.934179	0.955811	0.882641
YBR242W	YBR242W	0.770848	0.8142	0.912966	0.804741
YBR243C	ALG7	-0.0827706	0.4016	0.205852	0.418012
YBR244W	GPX2	0.799982	0.851255	0.853777	0.935053
YBR245C	ISW1	0.510595	0.671495	0.741138	0.649223
YBR246W	RRT2	0.14758	0.679315	0.550152	0.775462
YBR247C	ENP1	0.863597	0.937012	0.951598	0.949896
YBR248C	HIS7	0.704281	0.817125	0.821348	0.774876
YBR249C	ARO4	0.617967	0.873816	0.906292	0.737283
YBR250W	SPO23
YBR251W	MRPS5	0.0869622	0.480482	0.387439	0.583346
YBR252W	DUT1	0.830248	0.905287	0.93523	0.902759
YBR253W	SRB6	0.660228	0.757778	0.814369	0.736321
YBR254C	TRS20	0.26297	0.36524	0.495321	0.755573
YBR255W	MTC4	0.724457	0.879762	0.901153	0.771743
YBR256C	RIB5	0.73115	0.911795	0.934918	0.831346
YBR257W	POP4	0.385281	0.539576	0.353874	0.433819
YBR258C	SHG1
YBR259W	YBR259W	0.572273	0.774051	0.75321	0.594956
YBR260C	RGD1	0.566066	0.662998	0.582086	0.691751
YBR261C	TAE1	0.779428	0.913661	0.895048	0.909893
YBR262C	MIC12	-0.374437	-0.206102	0.820223	0.834466
YBR263W	SHM1	0.845351	0.907432	0.944766	0.933722
YBR264C	YPT10	-0.0572317	0.0624334	0.823878	0.400344
YBR265W	TSC10	-0.202777	0.20371	0.663494	0.578135
YBR266C	SLM6
YBR267W	REI1	0.850802	0.937976	0.951926	0.950347
YBR268W	MRPL37	0.390075	0.208908	0.466442	0.35675
YBR269C	SDH8	0.837826	0.932659	0.948244	0.911779
YBR270C	BIT2	0.533282	0.747861	0.899141	0.644013
YBR271W	EFM2	0.806995	0.891865	0.923755	0.89956
YBR272C	HSM3	0.700293	0.875762	0.920362	0.734919
YBR273C	UBX7	0.549838	0.838448	0.678325	0.66437
YBR274W	CHK1	0.477393	0.732637	0.820501	0.492053
YBR275C	RIF1	0.061336	0.399597	0.429366	0.350513
YBR276C	PPS1	0.0918917	0.485746	0.482462	0.40376
YBR277C	YBR277C
YBR278W	DPB3	0.637862	0.851465	0.888821	0.740635
YBR279W	PAF1	0.260542	0.376208	0.434069	0.287355
YBR280C	SAF1	0.84306	0.933702	0.950143	0.927374
YBR281C	DUG2	0.495393	0.661688	0.758221	0.832353
YBR282W	MRPL27	-0.24498	0.0331525	0.413181	0.774586
YBR283C	SSH1	0.78108	0.874543	0.946322	0.853316
YBR284W	YBR284W	0.68374	0.852972	0.86625	0.789632
YBR285W	YBR285W	0.827797	0.935387	0.963214	0.904762
YBR286W	APE3	0.150715	0.748084	0.734651	-0.266571
YBR287W	YBR287W	0.835301	0.923804	0.9417	0.908065
YBR288C	APM3	0.342491	0.317392	0.451283	0.59394
YBR289W	SNF5	0.580439	0.598025	0.604065	0.727968
YBR290W	BSD2	0.704191	0.811858	0.836012	0.762908
YBR291C	CTP1	0.773602	0.894388	0.863648	0.887668
YBR292C	YBR292C
YBR293W	VBA2	0.792409	0.91627	0.923867	0.908074
YBR294W	SUL1	0.79485	0.91882	0.915044	0.874502
YBR295W	PCA1	0.806644	0.863941	0.911335	0.892287
YBR296C	PHO89	0.678044	0.847997	0.89566	0.837074
YBR297W	MAL33
YBR298C	MAL31
YBR299W	MAL32
YBR300C	YBR300C
YBR301W	PAU24
YBR302C	COS2
YCL001W	RER1	0.502772	0.553972	0.571825	0.562361
YCL002C	YCL002C	0.465341	0.573013	0.683178	0.518066
YCL004W	PGS1
YCL005W	LDB16	0.237724	0.34255	0.45089	0.429156
YCL007C	YCL007C
YCL008C	STP22	0.354829	0.792321	0.860533	0.444175
YCL009C	ILV6	0.565652	0.548507	0.714013	0.68995
YCL010C	SGF29	0.589067	0.820758	0.747564	0.70146
YCL011C	GBP2	0.482922	0.762934	0.654699	0.718834
YCL014W	BUD3	0.295289	0.25991	0.338266	0.399718
YCL016C	DCC1	0.739281	0.839177	0.79751	0.843721
YCL017C	NFS1	0.323604	0.637819	0.427153	0.785282
YCL018W	LEU2	0.173152	0.792144	0.123077	0.731429
YCL019W	YCL019W
YCL020W	YCL020W
YCL022C	YCL022C
YCL023C	YCL023C
YCL024W	KCC4	0.485246	0.457217	0.470964	0.466457
YCL025C	AGP1	0.813255	0.929041	0.941707	0.890298
YCL027W	FUS1	0.716482	0.75002	0.908437	0.698686
YCL028W	RNQ1	0.485787	0.178531	0.0920694	0.602041
YCL029C	BIK1	0.374035	0.398299	0.474682	0.411023
YCL030C	HIS4	0.79628	0.88892	0.894391	0.86577
YCL031C	RRP7	0.742963	0.857274	0.864843	0.798338
YCL032W	STE50	0.686324	0.854593	0.812732	0.783017
YCL033C	MXR2	0.819499	0.922413	0.92623	0.905156
YCL034W	LSB5	0.764224	0.90078	0.933687	0.829644
YCL035C	GRX1	0.829639	0.926586	0.951983	0.911048
YCL036W	GFD2	0.776547	0.899143	0.850027	0.921517
YCL037C	SRO9	0.851321	0.927827	0.955341	0.940736
YCL038C	ATG22	0.822148	0.926843	0.947125	0.918701
YCL039W	GID7	0.805094	0.920086	0.937763	0.86698
YCL040W	GLK1	0.799348	0.935457	0.966022	0.865744
YCL041C	YCL041C
YCL042W	YCL042W
YCL043C	PDI1	0.746184	0.861434	0.909018	0.791984
YCL044C	MGR1	0.43994	0.272845	0.384459	0.711571
YCL045C	EMC1	0.622211	0.791028	0.867867	0.705944
YCL046W	YCL046W
YCL047C	POF1	0.53927	0.6534	0.674224	0.686403
YCL048W	SPS22
YCL049C	YCL049C	0.505094	0.855535	0.888646	0.611613
YCL050C	APA1	0.826407	0.928054	0.939413	0.927767
YCL051W	LRE1	0.554994	0.690686	0.790476	0.665002
YCL052C	PBN1	0.772717	0.897495	0.925216	0.839458
YCL054W	SPB1	0.872443	0.936073	0.957096	0.947718
YCL055W	KAR4	-0.00272122	0.48275	0.0493742	0.477592
YCL056C	PEX34	0.657272	0.768958	0.853755	0.681846
YCL057W	PRD1	0.317842	0.413149	0.450295	0.737146
YCL058C	FYV5
YCL059C	KRR1	0.855659	0.937412	0.951747	0.946669
YCL061C	MRC1	0.173914	0.481413	0.407579	0.528359
YCL063W	VAC17	-0.0197019	0.446974	0.334348	0.465537
YCL064C	CHA1	-0.679836	0.859189	0.882558	-0.642396
YCL065W	YCL065W
YCL066W	HMLALPHA1
YCL067C	HMLALPHA2
YCL068C	YCL068C
YCL069W	VBA3
YCL074W	YCL074W
YCL075W	YCL075W
YCL076W	YCL076W
YCR001W	YCR001W
YCR002C	CDC10	0.545126	0.699685	0.703162	0.608196
YCR003W	MRPL32	0.398453	0.19991	0.239088	0.416056
YCR004C	YCP4	0.775805	0.919835	0.943673	0.868589
YCR005C	CIT2	0.815653	0.934874	0.936934	0.919097
YCR006C	YCR006C
YCR007C	YCR007C
YCR008W	SAT4	0.439643	0.181724	0.449477	0.274697
YCR009C	RVS161	0.759777	0.871753	0.914645	0.829025
YCR010C	ADY2	0.800303	0.899187	0.924028	0.916298
YCR011C	ADP1	0.786909	0.924254	0.94512	0.865168
YCR012W	PGK1	0.728863	0.902954	0.88356	0.851069
YCR013C	YCR013C
YCR014C	POL4	0.494439	0.629176	0.530046	0.722216
YCR015C	CTO1	0.57773	0.855819	0.910093	0.638094
YCR016W	YCR016W	0.832238	0.9199	0.949958	0.917806
YCR017C	CWH43	-0.257466	0.30678	-0.141043	0.40285
YCR018C	SRD1
YCR019W	MAK32	0.639966	0.320059	0.804974	0.389229
YCR020C	PET18	0.665275	0.88181	0.907105	0.809019
YCR021C	HSP30	0.729901	0.884541	0.917741	0.867534
YCR022C	YCR022C
YCR023C	YCR023C	0.792983	0.895431	0.869506	0.884925
YCR024C	SLM5	0.041595	0.706362	0.819945	0.228879
YCR025C	YCR025C
YCR026C	NPP1	0.526605	0.757967	0.854221	0.624587
YCR027C	RHB1	0.442384	0.359577	0.670242	0.459588
YCR028C	FEN2	0.380009	0.350642	0.58475	0.35172
YCR030C	SYP1	0.711104	0.877079	0.87341	0.764562
YCR031C	RPS14A
YCR032W	BPH1	0.753869	0.864004	0.863751	0.839223
YCR033W	SNT1	0.690489	0.727207	0.796335	0.744007
YCR034W	ELO2	0.848178	0.930383	0.957318	0.939637
YCR035C	RRP43	0.569953	0.793083	0.732273	0.76257
YCR036W	RBK1	0.64579	0.757226	0.82349	0.77909
YCR037C	PHO87	-0.0539438	0.542971	-0.124562	0.549484
YCR038C	BUD5	0.803093	0.879908	0.883264	0.860514
YCR039C	MATALPHA2
YCR040W	MATALPHA1
YCR041W	YCR041W
YCR042C	TAF2	0.420373	0.407487	0.444643	0.341355
YCR043C	YCR043C	0.596	0.798374	0.756961	0.759595
YCR044C	PER1	0.0149737	0.559523	0.0135358	0.519716
YCR045C	RRT12
YCR046C	IMG1	0.6058	0.718771	0.699408	0.73026
YCR047C	BUD23	0.811119	0.9195	0.927982	0.885682
YCR048W	ARE1	0.534491	0.654674	0.6623	0.631556
YCR049C	YCR049C
YCR050C	YCR050C
YCR051W	YCR051W	0.848353	0.919405	0.941637	0.930132
YCR052W	RSC6	0.530779	0.339918	0.749835	0.360329
YCR053W	THR4	0.85294	0.917984	0.955919	0.924962
YCR054C	CTR86	0.542837	0.783329	0.576206	0.689764
YCR057C	PWP2	0.867474	0.937334	0.948412	0.954348
YCR059C	YIH1	0.812271	0.884647	0.899489	0.882267
YCR060W	TAH1	0.584362	0.698875	0.725039	0.724385
YCR061W	YCR061W	0.551888	0.841326	0.759708	0.517255
YCR063W	BUD31
YCR064C	YCR064C
YCR065W	HCM1	0.471808	0.514729	0.608396	0.612607
YCR066W	RAD18	0.232546	0.498942	0.55644	0.334761
YCR067C	SED4	0.188708	0.559491	0.543564	0.431189
YCR068W	ATG15
YCR069W	CPR4	0.766746	0.892701	0.863814	0.852186
YCR071C	IMG2	0.222543	0.113091	0.554555	0.58257
YCR072C	RSA4	0.851138	0.923568	0.934289	0.944012
YCR073C	SSK22	0.311008	0.0443471	0.609374	0.175427
YCR075C	ERS1	0.77225	0.922545	0.937282	0.827776
YCR076C	FUB1	0.737377	0.910092	0.938748	0.814674
YCR077C	PAT1	0.103574	0.208157	0.573353	0.518136
YCR079W	PTC6	0.772321	0.905779	0.926009	0.857875
YCR081W	SRB8
YCR082W	AHC2	0.379261	0.401204	0.483158	0.47615
YCR083W	TRX3	0.699247	0.859112	0.837226	0.884973
YCR084C	TUP1	0.431728	0.729277	0.804121	0.522877
YCR085W	YCR085W
YCR086W	CSM1	0.493831	0.801102	0.729171	0.558885
YCR087W	YCR087W
YCR088W	ABP1	0.664258	0.72459	0.74687	0.732595
YCR089W	FIG2	0.51739	0.749356	0.598679	0.821788
YCR090C	YCR090C	0.123796	-0.172463	0.640187	0.492646
YCR091W	KIN82	0.80795	0.899231	0.948018	0.870266
YCR092C	MSH3	0.282781	0.480891	0.533058	0.621691
YCR093W	CDC39	0.431121	0.676238	0.743436	0.497249
YCR094W	CDC50	-0.0219299	0.246843	0.225359	0.28887
YCR095C	OCA4	0.415393	0.575982	0.504777	0.465011
YCR096C	HMRA2
YCR098C	GIT1	0.739322	0.853103	0.891903	0.87546
YCR099C	YCR099C
YCR100C	EMA35
YCR101C	YCR101C
YCR102C	YCR102C
YCR104W	PAU3
YCR105W	ADH7
YCR106W	RDS1
YCR107W	AAD3	0.663068	0.815238	0.813834	0.797427
YDL001W	RMD1	0.654191	0.672924	0.628001	0.713136
YDL002C	NHP10	0.358903	0.5475	0.599175	0.453949
YDL003W	MCD1	0.363803	0.632199	0.66947	0.508941
YDL004W	ATP16	0.627912	0.826978	0.806929	0.703535
YDL005C	MED2	0.542681	0.504123	0.583118	0.641595
YDL006W	PTC1	0.459349	0.248639	0.830437	0.417487
YDL007W	RPT2	0.551891	0.315432	0.251099	0.525857
YDL008W	APC11
YDL009C	YDL009C
YDL010W	GRX6	0.814477	0.864893	0.896945	0.898372
YDL011C	YDL011C
YDL012C	YDL012C	0.191406	0.329728	0.90987	0.454616
YDL013W	SLX5	0.69255	0.812676	0.792656	0.81399
YDL014W	NOP1	0.876796	0.945933	0.971116	0.957377
YDL015C	TSC13	0.633879	0.641979	0.657307	0.723518
YDL016C	YDL016C
YDL017W	CDC7	0.347883	0.0467669	0.32642	0.141873
YDL018C	ERP3	0.107	0.208006	0.817285	0.452423
YDL019C	OSH2	0.796153	0.884881	0.895439	0.855484
YDL020C	RPN4	0.467619	0.758336	0.78096	0.639845
YDL021W	GPM2	0.822589	0.933467	0.962163	0.897896
YDL022W	GPD1	0.595637	0.923639	0.943202	0.663296
YDL023C	YDL023C
YDL024C	DIA3	0.831571	0.913927	0.916891	0.924841
YDL025C	RTK1	0.825999	0.909308	0.917778	0.896499
YDL026W	YDL026W
YDL027C	MRX9	0.825953	0.930395	0.950135	0.887718
YDL028C	MPS1	0.606147	0.75771	0.783198	0.674919
YDL029W	ARP2	0.611399	0.809333	0.743019	0.850118
YDL030W	PRP9	0.515641	0.480229	0.511118	0.807511
YDL031W	DBP10	0.844707	0.929167	0.946765	0.934362
YDL032W	YDL032W
YDL033C	SLM3
YDL034W	YDL034W
YDL035C	GPR1	0.593915	0.395952	0.857412	0.421394
YDL036C	PUS9	-0.362276	-0.51206	0.878572	0.703312
YDL037C	BSC1
YDL039C	PRM7
YDL040C	NAT1	0.638961	0.867962	0.820125	0.813975
YDL041W	YDL041W
YDL042C	SIR2	0.38158	0.762143	0.606312	0.376138
YDL043C	PRP11	0.209368	-0.500596	0.360341	0.349527
YDL044C	MTF2	0.201403	0.353049	0.521395	0.389962
YDL045C	FAD1	0.72135	0.855999	0.905807	0.779156
YDL046W	NPC2	0.797406	0.906326	0.911862	0.892491
YDL047W	SIT4	0.398404	0.435283	0.533005	0.60297
YDL048C	STP4	0.735851	0.849495	0.883546	0.827234
YDL049C	KNH1	0.763262	0.90073	0.9198	0.834203
YDL050C	YDL050C
YDL051W	LHP1	0.882571	0.940669	0.966953	0.955321
YDL052C	SLC1	0.695245	0.713276	0.739643	0.670105
YDL053C	PBP4	-0.302845	0.236491	0.691563	0.333298
YDL054C	MCH1	0.796181	0.904683	0.903654	0.886541
YDL055C	PSA1	0.641763	0.887016	0.859514	0.741354
YDL056W	MBP1	0.46937	0.330403	0.581829	0.428854
YDL057W	YDL057W	0.795417	0.910244	0.945411	0.85096
YDL058W	USO1	0.387558	0.494454	0.494523	0.613674
YDL059C	RAD59	0.78395	0.921056	0.924424	0.887929
YDL060W	TSR1	0.857764	0.939172	0.95713	0.952444
YDL061C	RPS29B	0.839083	0.941202	0.967942	0.929635
YDL062W	YDL062W
YDL063C	SYO1	0.854207	0.933838	0.946883	0.954767
YDL064W	UBC9	0.700477	0.691638	0.736747	0.736168
YDL065C	PEX19	0.652837	0.473603	0.704778	0.476688
YDL066W	IDP1	0.731048	0.879265	0.842985	0.825598
YDL067C	COX9	0.798698	0.873966	0.890291	0.837412
YDL068W	YDL068W
YDL069C	CBS1	0.67427	0.821837	0.821613	0.770834
YDL070W	BDF2	0.685922	0.767774	0.764455	0.79714
YDL071C	YDL071C
YDL072C	YET3	0.618152	0.890632	0.852261	0.648219
YDL073W	AHK1	0.545251	0.423876	0.615177	0.475372
YDL074C	BRE1	0.517924	0.604301	0.606281	0.56143
YDL075W	RPL31A	0.853149	0.94398	0.969704	0.934832
YDL076C	RXT3	0.720569	0.873418	0.863709	0.867281
YDL077C	VAM6	0.489674	0.670819	0.649715	0.65232
YDL078C	MDH3	0.825953	0.912859	0.93437	0.910577
YDL079C	MRK1	0.793217	0.908499	0.927857	0.853687
YDL080C	THI3	0.624631	0.691374	0.761606	0.672157
YDL081C	RPP1A	0.840981	0.94174	0.965814	0.924093
YDL082W	RPL13A	0.861448	0.94468	0.971414	0.938194
YDL083C	RPS16B	0.851437	0.943689	0.968413	0.93176
YDL084W	SUB2	0.807353	0.916027	0.930893	0.889048
YDL085W	NDE2	0.861306	0.93935	0.9632	0.939093
YDL086W	YDL086W	0.685425	0.854589	0.869262	0.733115
YDL087C	LUC7
YDL088C	ASM4	0.364024	0.420314	0.382421	0.575263
YDL089W	NUR1	0.636465	0.838761	0.779179	0.809115
YDL090C	RAM1	0.697052	0.828249	0.847614	0.755675
YDL091C	UBX3	0.813532	0.911134	0.938848	0.887333
YDL092W	SRP14	0.579401	0.792743	0.748922	0.771065
YDL093W	PMT5	-0.0870687	0.380015	0.319082	0.731474
YDL094C	YDL094C
YDL095W	PMT1	0.722642	0.879868	0.906921	0.779569
YDL096C	OPI6
YDL097C	RPN6	0.528569	0.623984	0.490088	0.384547
YDL098C	SNU23	0.171567	0.421131	0.329544	0.464447
YDL099W	BUG1	0.228079	0.298805	0.305094	0.299662
YDL100C	GET3	0.765683	0.807468	0.875147	0.786978
YDL101C	DUN1	0.174617	0.603369	0.56275	0.481174
YDL102W	POL3	0.244822	0.729685	0.738214	0.371699
YDL103C	QRI1	0.211847	-0.0261867	0.379239	0.641021
YDL104C	QRI7	0.745318	0.862181	0.879074	0.865236
YDL105W	NSE4	0.526962	0.517112	0.595482	0.736967
YDL106C	PHO2	0.63821	0.823777	0.691828	0.830732
YDL107W	MSS2	0.650421	0.848099	0.879875	0.730383
YDL108W	KIN28	0.189356	0.63436	0.665053	0.166421
YDL109C	YDL109C
YDL110C	TMA17	0.848925	0.936677	0.955541	0.918261
YDL111C	RRP42	0.762906	0.88842	0.879166	0.834809
YDL112W	TRM3	0.809642	0.920559	0.935237	0.906243
YDL113C	ATG20	0.83476	0.925855	0.933585	0.911592
YDL114W	YDL114W	0.736594	0.83131	0.882479	0.780129
YDL115C	IWR1	0.743139	0.860004	0.922716	0.833595
YDL116W	NUP84	0.205165	0.460857	0.416035	0.225585
YDL117W	CYK3	0.423132	0.639909	0.613477	0.67455
YDL118W	YDL118W
YDL119C	HEM25	0.685949	0.776909	0.729059	0.800139
YDL120W	YFH1
YDL121C	EXP1	0.831457	0.894987	0.954944	0.874963
YDL122W	UBP1	0.79042	0.879208	0.907458	0.853492
YDL123W	SNA4	0.655518	0.869571	0.913867	0.759419
YDL124W	YDL124W	0.691983	0.936093	0.954863	0.739184
YDL125C	HNT1	0.440937	0.635041	0.686618	0.757218
YDL126C	CDC48	0.236798	0.120639	0.472603	0.648764
YDL127W	PCL2	0.612085	0.657659	0.682829	0.703204
YDL128W	VCX1	0.624327	0.645545	0.722476	0.664334
YDL129W	YDL129W	0.361633	0.841833	0.851153	0.384081
YDL130W	RPP1B	0.853415	0.943649	0.968384	0.932145
YDL131W	LYS21	0.728615	0.84788	0.820858	0.884594
YDL132W	CDC53	0.551128	0.809952	0.785762	0.747913
YDL133W	SRF1	0.667027	0.816272	0.817635	0.757694
YDL134C	PPH21	-0.105586	0.536359	0.839635	0.330625
YDL135C	RDI1	0.119075	0.532756	0.30221	0.476217
YDL136W	RPL35B
YDL137W	ARF2	0.811377	0.907053	0.938113	0.892417
YDL138W	RGT2	0.722577	0.834635	0.859728	0.788451
YDL139C	SCM3	0.728074	0.858585	0.867107	0.783574
YDL140C	RPO21	0.738954	0.892733	0.94334	0.817225
YDL141W	BPL1	0.121565	0.509166	0.369325	0.452154
YDL142C	CRD1	0.660575	0.821139	0.916962	0.746409
YDL143W	CCT4	0.846129	0.917154	0.942403	0.940269
YDL144C	YDL144C	0.686265	0.844549	0.84816	0.786698
YDL145C	COP1	0.146345	0.544115	0.891649	0.501433
YDL146W	LDB17	0.455548	0.828303	0.845924	0.551247
YDL147W	RPN5	0.525313	0.69487	0.674039	0.592005
YDL148C	NOP14	0.857226	0.93571	0.952219	0.946801
YDL149W	ATG9	0.827064	0.930812	0.947436	0.89454
YDL150W	RPC53	0.84952	0.92273	0.945683	0.922858
YDL151C	BUD30
YDL152W	YDL152W
YDL153C	SAS10	0.868098	0.929475	0.955062	0.94964
YDL154W	MSH5	0.548343	0.79408	0.813325	0.693863
YDL155W	CLB3	0.324344	0.358521	0.436247	0.700378
YDL156W	CMR1
YDL157C	YDL157C	0.782264	0.693334	0.929322	0.749209
YDL158C	YDL158C
YDL159W	STE7	0.754449	0.828376	0.801328	0.847025
YDL160C	DHH1
YDL161W	ENT1	0.271418	0.490689	0.483816	0.409553
YDL162C	YDL162C
YDL163W	YDL163W
YDL164C	CDC9	0.386299	0.648231	0.742097	0.486284
YDL165W	CDC36	0.560151	0.651349	0.587997	0.800115
YDL166C	FAP7	0.81687	0.901774	0.907785	0.915037
YDL167C	NRP1	0.847384	0.926569	0.947595	0.940147
YDL168W	SFA1	0.802502	0.210567	0.891568	0.282176
YDL169C	UGX2	0.84905	0.941196	0.960631	0.917884
YDL170W	UGA3	0.829609	0.920656	0.920993	0.900682
YDL171C	GLT1	0.718584	0.842718	0.811835	0.85901
YDL172C	YDL172C
YDL173W	PAR32	0.247893	0.543139	0.364945	0.837025
YDL174C	DLD1	0.795762	0.919357	0.931277	0.89347
YDL175C	AIR2	0.644501	0.78843	0.675106	0.829218
YDL176W	YDL176W	0.790586	0.896701	0.912163	0.852689
YDL177C	YDL177C	0.656847	0.602582	0.647396	0.658166
YDL178W	DLD2	0.424665	0.478991	0.488036	0.516252
YDL179W	PCL9	0.712789	0.842816	0.861383	0.821249
YDL180W	YDL180W	0.679249	0.810747	0.902139	0.752205
YDL181W	INH1	0.703185	0.904059	0.929292	0.752682
YDL182W	LYS20	0.381346	0.815071	0.580207	0.884723
YDL183C	YDL183C	0.81955	0.910025	0.917673	0.906364
YDL184C	RPL41A
YDL185W	VMA1
YDL186W	YDL186W
YDL187C	YDL187C
YDL188C	PPH22	0.4189	0.356333	0.496272	0.428404
YDL189W	RBS1	0.2716	0.483562	0.781273	0.463637
YDL190C	UFD2	0.151765	0.119905	0.446192	0.542347
YDL191W	RPL35A	0.844873	0.939682	0.964494	0.930292
YDL192W	ARF1	0.861536	0.942267	0.96124	0.930775
YDL193W	NUS1	-0.0550211	0.510211	0.425509	-0.08416
YDL194W	SNF3	0.619564	0.769326	0.857968	0.754324
YDL195W	SEC31	0.502606	0.801101	0.808743	0.637232
YDL196W	YDL196W
YDL197C	ASF2	0.599862	0.636178	0.813755	0.674497
YDL198C	GGC1	0.742302	0.889855	0.871602	0.842143
YDL199C	YDL199C	0.832251	0.934562	0.957004	0.896706
YDL200C	MGT1	0.818438	0.920409	0.932443	0.883293
YDL201W	TRM8	0.865768	0.933567	0.959498	0.9423
YDL202W	MRPL11	0.474195	0.31481	0.61702	0.26409
YDL203C	ACK1	0.738265	0.800094	0.81031	0.841448
YDL204W	RTN2	0.856181	0.935611	0.951425	0.928912
YDL205C	HEM3	0.68487	0.797914	0.80367	0.867537
YDL206W	YDL206W	0.362871	-0.0957332	0.312919	0.398591
YDL207W	GLE1	0.567993	0.392528	0.640612	0.505464
YDL208W	NHP2	0.881057	0.945132	0.969493	0.959179
YDL209C	CWC2	0.397312	-0.0523125	0.356459	0.521282
YDL210W	UGA4	0.776097	0.920144	0.925903	0.873156
YDL211C	YDL211C	0.415374	0.232066	0.287978	0.43708
YDL212W	SHR3	0.59464	0.613008	0.866383	0.636077
YDL213C	NOP6	0.88824	0.932299	0.964373	0.956923
YDL214C	PRR2	0.778484	0.91707	0.918285	0.911924
YDL215C	GDH2	0.810246	0.929843	0.921574	0.905695
YDL216C	RRI1	0.809419	0.918603	0.944673	0.875678
YDL217C	TIM22	0.313726	0.368456	0.394699	0.576139
YDL218W	YDL218W	0.285466	0.802209	0.848111	0.398926
YDL219W	DTD1	-0.0876637	0.0809281	0.829889	0.483988
YDL220C	CDC13	0.576785	0.667592	0.550248	0.852382
YDL221W	YDL221W
YDL222C	FMP45	0.824234	0.927388	0.949185	0.908123
YDL223C	HBT1	0.740514	0.911051	0.943533	0.851122
YDL224C	WHI4	0.749079	0.873639	0.819922	0.861822
YDL225W	SHS1	0.193468	0.368848	0.434428	0.356076
YDL226C	GCS1	-0.0155016	0.102829	0.725171	0.512885
YDL227C	HO	0.554909	0.714072	0.608253	0.701093
YDL228C	YDL228C
YDL229W	SSB1	0.880834	0.947294	0.972575	0.954274
YDL230W	PTP1	0.689646	0.894978	0.880195	0.762016
YDL231C	BRE4	0.692728	0.536017	0.905659	0.645233
YDL232W	OST4
YDL233W	MFG1	0.700944	0.870935	0.769126	0.870795
YDL234C	GYP7	0.841024	0.92769	0.94006	0.921512
YDL235C	YPD1	0.580089	0.346673	0.48948	0.743687
YDL236W	PHO13	0.432584	0.535496	0.734215	0.573685
YDL237W	AIM6	0.773382	0.905123	0.882285	0.872397
YDL238C	GUD1	0.827264	0.936486	0.954732	0.910465
YDL239C	ADY3	0.775162	0.923806	0.933487	0.852755
YDL240W	LRG1	0.68062	0.819549	0.780322	0.838938
YDL241W	YDL241W	0.716722	0.836064	0.954548	0.796865
YDL242W	YDL242W
YDL243C	AAD4
YDL244W	THI13
YDL245C	HXT15
YDL246C	SOR2
YDL247W	MPH2
YDL248W	COS7
YDR001C	NTH1	0.858295	0.931557	0.955406	0.924776
YDR002W	YRB1	0.83243	0.88375	0.923441	0.880198
YDR003W	RCR2	0.760675	0.908212	0.937246	0.837379
YDR004W	RAD57	0.707711	0.82223	0.860206	0.81232
YDR005C	MAF1	0.785599	0.904447	0.916668	0.885292
YDR006C	SOK1	0.50313	0.375982	0.264726	0.471536
YDR007W	TRP1	0.719542	0.825103	0.875018	0.83391
YDR008C	YDR008C
YDR009W	GAL3
YDR010C	YDR010C
YDR011W	SNQ2	0.828993	0.930503	0.958499	0.906747
YDR012W	RPL4B
YDR013W	PSF1	0.581393	0.77112	0.723044	0.815309
YDR014W	RAD61	0.591745	0.706454	0.868509	0.622189
YDR015C	YDR015C
YDR016C	DAD1	0.705485	0.825023	0.885586	0.784909
YDR017C	KCS1	0.645506	0.626932	0.768967	0.677662
YDR018C	YDR018C	0.773048	0.891252	0.951938	0.861402
YDR019C	GCV1	0.818326	0.930492	0.942765	0.911223
YDR020C	DAS2	0.742497	0.779849	0.782606	0.881644
YDR021W	FAL1	0.751582	0.89539	0.894606	0.842011
YDR022C	ATG31	0.794373	0.914422	0.952151	0.87448
YDR023W	SES1	0.838074	0.925254	0.946313	0.923057
YDR024W	FYV1
YDR025W	RPS11A
YDR026C	NSI1	0.608351	0.827027	0.766576	0.683753
YDR027C	VPS54	0.667038	0.837826	0.877648	0.753807
YDR028C	REG1	0.696088	0.709739	0.710177	0.705477
YDR029W	YDR029W
YDR030C	RAD28	0.487528	0.828054	0.906641	0.603546
YDR031W	MIX14	0.796057	0.925881	0.952691	0.859815
YDR032C	PST2	0.873116	0.92882	0.955916	0.945218
YDR033W	MRH1	0.538326	0.678412	0.767096	0.552725
YDR034C	LYS14	0.809107	0.896804	0.913462	0.878307
YDR035W	ARO3	-0.0888343	0.545282	0.700036	0.624635
YDR036C	EHD3	0.43896	0.579821	0.457876	0.528772
YDR037W	KRS1	0.844889	0.946024	0.966615	0.918488
YDR038C	ENA5
YDR039C	ENA2
YDR040C	ENA1
YDR041W	RSM10	0.657015	0.826451	0.897051	0.70693
YDR042C	YDR042C
YDR043C	NRG1	0.810052	0.920274	0.943345	0.888055
YDR044W	HEM13	0.644873	0.686304	0.709654	0.73816
YDR045C	RPC11	0.832365	0.9101	0.937068	0.920171
YDR046C	BAP3	0.776926	0.904203	0.898379	0.881013
YDR047W	HEM12
YDR048C	YDR048C
YDR049W	VMS1	0.339456	0.129684	0.467544	0.304615
YDR050C	TPI1	0.702824	0.843099	0.823587	0.797098
YDR051C	DET1	0.301012	0.744866	0.682241	0.321565
YDR052C	DBF4	0.335421	0.545255	0.583221	0.331622
YDR053W	YDR053W
YDR054C	CDC34	0.470628	0.623867	0.522517	0.414386
YDR055W	PST1	-0.197409	0.683533	0.590549	-0.436431
YDR056C	EMC10	0.42405	0.695931	0.659	0.603398
YDR057W	YOS9	0.656071	0.741957	0.736274	0.756605
YDR058C	TGL2	0.797567	0.898754	0.932978	0.844648
YDR059C	UBC5	0.824419	0.924579	0.950828	0.903637
YDR060W	MAK21	0.870285	0.935856	0.956939	0.954508
YDR061W	YDR061W	0.744196	0.504777	0.869151	0.526273
YDR062W	LCB2	0.573316	0.834485	0.891519	0.649592
YDR063W	AIM7	0.553772	0.854039	0.83503	0.64581
YDR064W	RPS13	0.84513	0.944227	0.96925	0.926659
YDR065W	RRG1
YDR066C	RTR2	0.812864	0.899909	0.902876	0.901856
YDR067C	OCA6	0.742051	0.87614	0.872782	0.850299
YDR068W	DOS2	0.396915	0.730083	0.531719	0.673478
YDR069C	DOA4	0.808095	0.910376	0.90425	0.892565
YDR070C	FMP16	0.849031	0.937725	0.960715	0.926014
YDR071C	PAA1	-0.0419428	0.240107	0.782686	0.43586
YDR072C	IPT1	0.562695	0.668582	0.795722	0.518819
YDR073W	SNF11	0.579008	0.79749	0.844822	0.705111
YDR074W	TPS2	0.8494	0.927921	0.944212	0.920147
YDR075W	PPH3	0.546172	0.494564	0.609401	0.718457
YDR076W	RAD55
YDR077W	SED1	0.448123	0.300197	0.51113	0.00963995
YDR078C	SHU2	-0.142694	0.641801	0.763756	0.239758
YDR079W	PET100	0.626629	0.81799	0.904422	0.682895
YDR080W	VPS41	0.751508	0.821868	0.851629	0.803171
YDR081C	PDC2	0.420311	0.525326	0.571966	0.427506
YDR082W	STN1	0.75725	0.874947	0.898171	0.809072
YDR083W	RRP8	0.846401	0.92942	0.9492	0.940736
YDR084C	TVP23	0.469499	0.807582	0.57974	0.860692
YDR085C	AFR1	0.538915	0.89271	0.912044	0.648304
YDR086C	SSS1	0.856775	0.87016	0.900772	0.904607
YDR087C	RRP1	0.873699	0.932987	0.9645	0.953407
YDR088C	SLU7	0.262686	0.130672	0.476295	0.0611167
YDR089W	VTC5	0.794281	0.902777	0.915077	0.888681
YDR090C	ILT1	0.798736	0.878333	0.870353	0.876174
YDR091C	RLI1	0.816645	0.927506	0.943531	0.919335
YDR092W	UBC13
YDR093W	DNF2	0.235816	0.79924	0.831718	0.326526
YDR094W	YDR094W
YDR095C	YDR095C
YDR096W	GIS1	0.632445	0.905545	0.924019	0.682032
YDR097C	MSH6	-0.400066	-0.120872	0.813501	0.517306
YDR098C	GRX3	0.0950399	0.496307	0.632737	0.401757
YDR099W	BMH2	0.732319	0.834772	0.836955	0.873114
YDR100W	TVP15	0.76772	0.901327	0.928811	0.8543
YDR101C	ARX1	0.865164	0.940994	0.959715	0.954625
YDR102C	YDR102C
YDR103W	STE5	0.816735	0.818545	0.849443	0.880001
YDR104C	SPO71	0.777362	0.895197	0.922793	0.831931
YDR105C	TMS1	0.662929	0.866068	0.780923	0.840545
YDR106W	ARP10	0.691051	0.791581	0.725831	0.878109
YDR107C	TMN2	0.647526	0.882369	0.845697	0.685987
YDR108W	TRS85	0.598982	0.745499	0.792489	0.636603
YDR109C	YDR109C	0.132843	0.113538	0.777259	0.388182
YDR110W	FOB1	0.558526	0.819541	0.553328	0.853475
YDR111C	ALT2
YDR112W	IRC2
YDR113C	PDS1	0.683037	0.848376	0.743543	0.858143
YDR114C	YDR114C
YDR115W	MRX14	-0.31746	0.36764	0.334492	0.680819
YDR116C	MRPL1	0.387189	0.5156	0.532257	0.610731
YDR117C	TMA64	0.369939	0.472025	0.359641	0.480469
YDR118W	APC4	0.699889	0.83327	0.871886	0.726485
YDR119W	VBA4	0.741282	0.857032	0.861734	0.904094
YDR120C	TRM1	0.825739	0.920221	0.939213	0.91127
YDR121W	DPB4	0.365906	0.218905	0.893529	0.348177
YDR122W	KIN1	0.825603	0.927444	0.926205	0.903909
YDR123C	INO2
YDR124W	YDR124W
YDR125C	ECM18
YDR126W	SWF1	0.560761	0.546233	0.512723	0.646845
YDR127W	ARO1	0.467333	0.616717	0.730009	0.523274
YDR128W	MTC5	0.696842	0.753442	0.695906	0.814172
YDR129C	SAC6	0.783158	0.918368	0.911123	0.872067
YDR130C	FIN1	0.681308	0.845062	0.867097	0.795964
YDR131C	YDR131C	0.782016	0.913417	0.898692	0.855761
YDR132C	MRX16	0.738845	0.716139	0.722987	0.815045
YDR133C	YDR133C
YDR134C	CCW22
YDR135C	YCF1	0.606853	0.55807	0.801888	0.524724
YDR136C	VPS61
YDR137W	RGP1	0.680956	0.808562	0.803588	0.808306
YDR138W	HPR1
YDR139C	RUB1
YDR140W	MTQ2	0.330304	0.356974	0.458483	0.347759
YDR141C	DOP1	0.658664	0.710731	0.728626	0.691472
YDR142C	PEX7	0.739866	0.78948	0.83468	0.83702
YDR143C	SAN1	0.683835	0.836588	0.827941	0.841831
YDR144C	MKC7	0.816063	0.922736	0.963055	0.863063
YDR145W	TAF12
YDR146C	SWI5	0.456956	0.80257	0.536705	0.839892
YDR147W	EKI1	0.696004	0.857836	0.779866	0.860435
YDR148C	KGD2	0.794624	0.927257	0.932359	0.876656
YDR149C	YDR149C
YDR150W	NUM1	0.691633	0.700569	0.865769	0.694651
YDR151C	CTH1	0.0410711	-0.349032	0.371077	0.497195
YDR152W	GIR2	0.853367	0.819494	0.948433	0.819948
YDR153C	ENT5	0.483314	0.451067	0.550141	0.632901
YDR154C	YDR154C
YDR155C	CPR1	0.784107	0.911054	0.914788	0.861267
YDR156W	RPA14	0.851855	0.931463	0.934175	0.946206
YDR157W	YDR157W
YDR158W	HOM2	0.414656	0.766293	0.635032	0.630104
YDR159W	SAC3	0.307852	0.375461	0.524557	0.419747
YDR160W	SSY1	0.736909	0.854296	0.842254	0.843398
YDR161W	ACL4	0.865086	0.935261	0.960683	0.943505
YDR162C	NBP2	0.154412	0.361673	0.707437	0.403733
YDR163W	CWC15	0.372949	0.71378	0.359116	0.634763
YDR164C	SEC1	0.273897	0.199245	0.385172	0.816125
YDR165W	TRM82	0.865727	0.925488	0.957216	0.942282
YDR166C	SEC5	0.624412	0.687519	0.711866	0.657988
YDR167W	TAF10	0.222966	0.417957	0.430847	0.376098
YDR168W	CDC37	0.340384	0.562638	0.49558	0.776059
YDR169C	STB3	0.751171	0.892735	0.869713	0.8499
YDR170C	SEC7	-0.101481	0.456513	0.571632	0.558714
YDR171W	HSP42	0.832188	0.935996	0.950753	0.893944
YDR172W	SUP35	0.857301	0.937581	0.960751	0.939716
YDR173C	ARG82	0.415183	0.551327	0.747574	0.476552
YDR174W	HMO1	0.467914	0.727005	0.633683	0.772211
YDR175C	RSM24	0.171528	0.355367	0.451386	0.295913
YDR176W	NGG1	0.536808	0.744098	0.55428	0.756711
YDR177W	UBC1	0.0751763	0.474392	0.187327	0.469986
YDR178W	SDH4	0.830107	0.924969	0.931141	0.882681
YDR179C	CSN9	0.631661	0.853403	0.66154	0.849792
YDR180W	SCC2	0.326052	0.510883	0.724295	0.400666
YDR181C	SAS4	0.732024	0.840071	0.828783	0.802131
YDR182W	CDC1	0.413341	0.808843	0.465883	0.859167
YDR183W	PLP1	0.414053	0.580306	0.613479	0.594006
YDR184C	ATC1	0.843218	0.93533	0.945876	0.9373
YDR185C	UPS3
YDR186C	SND1	0.692341	0.759209	0.793649	0.771608
YDR187C	YDR187C
YDR188W	CCT6	0.811761	0.874584	0.883348	0.898553
YDR189W	SLY1	0.467035	0.608159	0.563573	0.648507
YDR190C	RVB1	0.795399	0.885603	0.915829	0.858361
YDR191W	HST4	0.67815	0.8665	0.843068	0.754558
YDR192C	NUP42	0.35671	0.673443	0.514454	0.756049
YDR193W	YDR193W
YDR194C	MSS116	0.75971	0.880543	0.901232	0.84459
YDR195W	REF2	0.635028	0.509893	0.57294	0.682122
YDR196C	CAB5	0.732775	0.899357	0.915521	0.834239
YDR197W	CBS2	0.237742	0.767042	0.790671	0.230106
YDR198C	RKM2	0.231714	-0.0783656	0.390841	0.782548
YDR199W	YDR199W
YDR200C	VPS64	0.707761	0.796292	0.713646	0.823189
YDR201W	SPC19	0.522611	0.715688	0.610064	0.690595
YDR202C	RAV2	0.813042	0.918938	0.921612	0.905084
YDR203W	YDR203W
YDR204W	COQ4	0.844867	0.927292	0.945714	0.924799
YDR205W	MSC2	0.367268	0.563791	0.495353	0.559514
YDR206W	EBS1	0.455772	0.393214	0.169866	0.340255
YDR207C	UME6	0.463872	0.540738	0.684442	0.639454
YDR208W	MSS4	0.675487	0.701782	0.767699	0.761652
YDR209C	YDR209C
YDR210W	YDR210W
YDR211W	GCD6	0.623435	0.778793	0.906928	0.715718
YDR212W	TCP1	0.843328	0.883393	0.922252	0.923924
YDR213W	UPC2	0.414407	0.349797	0.437769	0.487927
YDR214W	AHA1	0.713358	0.84681	0.819097	0.8994
YDR215C	YDR215C
YDR216W	ADR1	0.736782	0.879759	0.890449	0.898021
YDR217C	RAD9	0.041964	0.180288	0.653298	0.384417
YDR218C	SPR28
YDR219C	MFB1	0.78824	0.895752	0.897656	0.881195
YDR220C	YDR220C
YDR221W	GTB1	0.775035	0.890989	0.877257	0.885298
YDR222W	YDR222W	0.712355	0.851392	0.840936	0.842843
YDR223W	CRF1	0.798594	0.914571	0.908397	0.898258
YDR224C	HTB1	0.499268	0.768815	0.725724	0.674185
YDR225W	HTA1	0.516047	0.713522	0.608039	0.678713
YDR226W	ADK1	0.779015	0.923777	0.944755	0.891875
YDR227W	SIR4	0.609943	0.699172	0.690665	0.71746
YDR228C	PCF11	0.512891	0.504901	0.50976	0.632798
YDR229W	IVY1	0.768138	0.874534	0.824411	0.878822
YDR230W	YDR230W
YDR231C	COX20	0.854254	0.928324	0.945459	0.914648
YDR232W	HEM1	0.523834	0.74877	0.695877	0.808531
YDR233C	RTN1	0.769016	0.89544	0.926424	0.85137
YDR234W	LYS4	0.308007	0.529958	0.712543	0.791062
YDR235W	PRP42	0.741617	0.816628	0.841044	0.815512
YDR236C	FMN1	0.681692	0.788654	0.877944	0.737504
YDR237W	MRPL7	0.564529	0.651569	0.570226	0.731466
YDR239C	YDR239C
YDR240C	SNU56	0.334668	0.374879	0.315317	0.506384
YDR241W	BUD26
YDR246W	TRS23	0.0668107	0.452015	0.576425	0.181404
YDR247W	VHS1	0.733085	0.880185	0.853678	0.851026
YDR248C	YDR248C	0.788196	0.916651	0.943273	0.899151
YDR249C	YDR249C	-0.00756991	0.38814	0.714431	0.358034
YDR250C	YDR250C
YDR251W	PAM1	0.758845	0.890894	0.862624	0.856533
YDR252W	BTT1	0.78329	0.921596	0.936035	0.869968
YDR253C	MET32	0.772603	0.923777	0.926499	0.873871
YDR254W	CHL4	0.814075	0.924075	0.940127	0.893309
YDR255C	RMD5	0.845825	0.920343	0.939694	0.927611
YDR256C	CTA1	0.7619	0.908884	0.879956	0.891581
YDR257C	RKM4	0.187522	0.489135	0.43134	0.623517
YDR258C	HSP78	0.78177	0.88288	0.908525	0.842248
YDR259C	YAP6	0.810959	0.902366	0.899759	0.874993
YDR260C	SWM1
YDR261C	EXG2	-0.180133	0.14708	0.62247	0.894044
YDR262W	YDR262W	0.803736	0.899433	0.92157	0.8889
YDR263C	DIN7	0.36679	0.845294	0.466834	0.890363
YDR264C	AKR1	0.475749	0.440653	0.626048	0.436388
YDR265W	PEX10	0.763543	0.888845	0.913747	0.790744
YDR266C	HEL2	0.662684	0.761963	0.852977	0.725527
YDR267C	CIA1	-0.146197	0.0321046	0.591847	0.560159
YDR268W	MSW1	0.418747	0.803827	0.699541	0.533548
YDR269C	YDR269C
YDR270W	CCC2	0.222995	0.818889	0.175834	0.839045
YDR271C	YDR271C
YDR272W	GLO2	0.812047	0.898884	0.917002	0.907197
YDR273W	DON1	0.77445	0.842992	0.888291	0.828193
YDR274C	YDR274C
YDR275W	BSC2	0.474517	0.879237	0.926854	0.60379
YDR276C	PMP3	0.663208	0.881818	0.856249	0.778792
YDR277C	MTH1	0.410069	0.726572	0.868908	0.68828
YDR278C	YDR278C
YDR279W	RNH202
YDR280W	RRP45	0.677939	0.761118	0.755497	0.879643
YDR281C	PHM6	0.329974	0.814657	0.421539	0.855003
YDR282C	MRX10	0.746603	0.877118	0.908679	0.826965
YDR283C	GCN2	0.751783	0.869417	0.873409	0.816137
YDR284C	DPP1	0.810201	0.910728	0.92806	0.890374
YDR285W	ZIP1	0.639177	0.886979	0.728574	0.906318
YDR286C	MGP12	0.377379	0.768292	0.868763	0.404816
YDR287W	INM2	0.813443	0.914684	0.944448	0.859654
YDR288W	NSE3	0.717338	0.826351	0.875577	0.787136
YDR289C	RTT103
YDR290W	YDR290W
YDR291W	HRQ1	0.563445	0.619207	0.698305	0.798319
YDR292C	SRP101	0.545226	0.698145	0.764904	0.606306
YDR293C	SSD1	0.692817	0.849748	0.800293	0.775994
YDR294C	DPL1	0.308319	0.672398	0.646712	0.395992
YDR295C	HDA2	0.499764	0.460395	0.54388	0.586069
YDR296W	MHR1	-0.102836	0.456701	0.507238	0.411096
YDR297W	SUR2	0.214343	0.736557	0.749181	0.295161
YDR298C	ATP5	0.712624	0.786706	0.854875	0.711254
YDR299W	BFR2	0.835141	0.92922	0.932627	0.93913
YDR300C	PRO1	0.80681	0.903711	0.936025	0.875522
YDR301W	CFT1	0.512249	0.415982	0.628783	0.462257
YDR302W	GPI11	0.0973397	0.266291	0.471	0.536001
YDR303C	RSC3	0.392784	0.583708	0.460216	0.620156
YDR304C	CPR5	0.451896	0.524116	0.644029	0.538969
YDR305C	HNT2	0.683488	0.835315	0.822024	0.745435
YDR306C	PFU1	0.772831	0.906652	0.923708	0.869388
YDR307W	PMT7	0.372813	0.502532	0.711675	0.548627
YDR308C	SRB7	0.517068	0.550779	0.66236	0.573832
YDR309C	GIC2	-0.0238061	0.484838	0.50793	0.499954
YDR310C	SUM1	0.314403	0.630164	0.565756	0.498479
YDR311W	TFB1	0.164362	0.437114	0.776198	0.352014
YDR312W	SSF2	0.826036	0.904437	0.915399	0.925632
YDR313C	PIB1	0.741157	0.897385	0.902388	0.81242
YDR314C	RAD34	0.779255	0.901648	0.859575	0.912577
YDR315C	IPK1	0.553557	0.881711	0.928372	0.553417
YDR316W	OMS1	-0.161687	0.422935	0.27185	0.453193
YDR317W	HIM1
YDR318W	MCM21	0.35975	0.292721	0.879721	0.518507
YDR319C	YFT2	0.577168	0.809829	0.933849	0.700623
YDR320C	SWA2	0.381665	0.486916	0.577029	0.46326
YDR321W	ASP1	0.879233	0.938489	0.967614	0.955528
YDR322W	MRPL35	-0.00630221	0.322764	0.332945	0.644822
YDR323C	PEP7	-0.413298	0.393667	0.893959	0.195648
YDR324C	UTP4	0.873512	0.941479	0.963388	0.952256
YDR325W	YCG1	0.467352	0.21064	0.620058	0.480418
YDR326C	YSP2	0.375101	0.500174	0.563263	0.516058
YDR327W	YDR327W
YDR328C	SKP1	0.465516	0.796955	0.771628	0.538335
YDR329C	PEX3	0.785621	0.901475	0.913101	0.893835
YDR330W	UBX5	0.784246	0.916335	0.935062	0.862587
YDR331W	GPI8	-0.178731	0.0212042	0.725963	0.556834
YDR332W	IRC3	0.623217	0.733845	0.740511	0.666642
YDR333C	RQC1	0.13883	0.299805	0.466792	0.53706
YDR334W	SWR1	0.202004	0.495837	0.36297	0.650944
YDR335W	MSN5	0.673843	0.839633	0.80519	0.791516
YDR336W	MRX8	0.625291	0.836642	0.838205	0.782219
YDR337W	MRPS28	0.479681	0.0792434	0.281299	0.512842
YDR338C	YDR338C	0.697922	0.814607	0.787304	0.785948
YDR339C	FCF1	0.822579	0.916213	0.893872	0.930989
YDR340W	YDR340W
YDR341C	YDR341C	0.860171	0.933732	0.952791	0.951232
YDR342C	HXT7
YDR343C	HXT6
YDR344C	YDR344C
YDR345C	HXT3	0.721602	0.872356	0.886472	0.732282
YDR346C	SVF1	0.75855	0.888094	0.90077	0.843715
YDR347W	MRP1	0.403073	0.443631	0.437402	0.609045
YDR348C	PAL1	0.279643	0.574257	0.539749	0.69542
YDR349C	YPS7	0.343252	0.418018	0.218344	-0.0692681
YDR350C	ATP22	0.757861	0.903549	0.901452	0.822606
YDR351W	SBE2	0.457822	0.511266	0.647131	0.441792
YDR352W	YPQ2	0.680071	0.629485	0.816162	0.675751
YDR353W	TRR1	0.743409	0.830098	0.933176	0.774447
YDR354W	TRP4	0.726437	0.851706	0.827949	0.820014
YDR355C	YDR355C
YDR356W	SPC110	0.731514	0.778699	0.80933	0.779938
YDR357C	CNL1	0.71526	0.871589	0.902111	0.79223
YDR358W	GGA1	0.861412	0.93397	0.953868	0.936522
YDR359C	EAF1	0.466549	0.624748	0.502935	0.710225
YDR360W	OPI7
YDR361C	BCP1	0.859969	0.930094	0.947434	0.945317
YDR362C	TFC6	0.641964	0.720361	0.766097	0.725445
YDR363W	ESC2
YDR364C	CDC40	0.346753	0.128025	0.321273	0.351729
YDR365C	ESF1	0.879693	0.937715	0.965911	0.953716
YDR366C	YDR366C
YDR367W	KEI1	0.578471	0.199339	0.322585	0.74856
YDR368W	YPR1	-0.279627	0.390761	0.940212	0.154367
YDR369C	XRS2	0.741963	0.843595	0.889721	0.831324
YDR370C	DXO1
YDR371W	CTS2	-0.028932	0.402752	0.682434	0.448886
YDR372C	VPS74	0.367067	0.361374	0.334509	0.542958
YDR373W	FRQ1	0.436267	0.67611	0.586548	0.564123
YDR374C	PHO92
YDR375C	BCS1	0.281247	0.0184083	0.149677	0.331707
YDR376W	ARH1	0.588861	0.68825	0.74147	0.697963
YDR377W	ATP17	0.726032	0.868076	0.893497	0.744516
YDR378C	LSM6	0.28967	0.408854	0.544343	0.517334
YDR379W	RGA2	0.722336	0.834584	0.870367	0.753655
YDR380W	ARO10	0.446562	0.451575	0.502285	0.718722
YDR381W	YRA1
YDR382W	RPP2B	0.835809	0.942523	0.966161	0.926249
YDR383C	NKP1	0.487359	0.798066	0.788724	0.538503
YDR384C	ATO3	0.838526	0.91574	0.935304	0.925519
YDR385W	EFT2	0.865634	0.943314	0.969651	0.946798
YDR386W	MUS81	0.718574	0.824046	0.86699	0.833463
YDR387C	CIN10	0.759513	0.885672	0.921021	0.782779
YDR388W	RVS167	0.734833	0.891065	0.874318	0.856168
YDR389W	SAC7	0.413209	0.473602	0.537037	0.538119
YDR390C	UBA2	0.20564	0.189019	0.415772	0.392792
YDR391C	YDR391C	0.814995	0.927655	0.954164	0.904348
YDR392W	SPT3	0.655841	0.777912	0.81847	0.74279
YDR393W	SHE9	0.444838	0.329803	0.588639	0.406758
YDR394W	RPT3	0.585257	0.615993	0.3182	0.275992
YDR395W	SXM1	0.816529	0.91834	0.941392	0.928556
YDR396W	YDR396W
YDR397C	NCB2	0.485094	0.52012	0.464841	0.540911
YDR398W	UTP5	0.849572	0.942274	0.928949	0.958653
YDR399W	HPT1	0.841594	0.916936	0.908521	0.885957
YDR400W	URH1	-0.520198	-0.150456	0.834736	0.607537
YDR401W	YDR401W
YDR402C	DIT2
YDR403W	DIT1
YDR404C	RPB7	0.515284	0.658767	0.670167	0.810468
YDR405W	MRP20	-0.264225	0.389308	0.662428	0.252147
YDR406W	PDR15	0.736565	0.895374	0.929457	0.806644
YDR407C	TRS120	0.585465	0.712319	0.747333	0.66651
YDR408C	ADE8	0.607896	0.671449	0.786247	0.665681
YDR409W	SIZ1	0.290514	0.55359	0.466285	0.721513
YDR410C	STE14	0.474235	0.56814	0.705962	0.596826
YDR411C	DFM1	0.719556	0.804974	0.855793	0.786597
YDR412W	RRP17	0.861015	0.931426	0.940295	0.953163
YDR413C	YDR413C
YDR414C	ERD1	0.662975	0.810638	0.766295	0.78631
YDR415C	YDR415C	0.671577	0.688939	0.794202	0.58947
YDR416W	SYF1	0.582507	0.381689	0.701154	0.524425
YDR417C	YDR417C
YDR418W	RPL12B	0.838056	0.942111	0.96865	0.927237
YDR419W	RAD30	0.639418	0.759026	0.793223	0.6779
YDR420W	HKR1	0.48666	0.556982	0.549194	0.600644
YDR421W	ARO80	0.749635	0.854466	0.921671	0.81901
YDR422C	SIP1	0.226441	0.572169	0.679801	0.427628
YDR423C	CAD1	0.821028	0.906852	0.910435	0.902546
YDR424C	DYN2	0.522572	0.744698	0.730529	0.607634
YDR425W	SNX41	0.81506	0.916374	0.892256	0.878438
YDR426C	YDR426C
YDR427W	RPN9	0.469877	0.568766	0.520137	0.229067
YDR428C	BNA7	0.374718	0.508705	0.625059	0.509379
YDR429C	TIF35	0.864202	0.93456	0.966608	0.937758
YDR430C	CYM1	0.480778	0.496321	0.494805	0.829323
YDR431W	YDR431W
YDR432W	NPL3	0.842191	0.903555	0.933952	0.91656
YDR433W	YDR433W
YDR434W	GPI17	0.347953	0.531272	0.469472	0.507491
YDR435C	PPM1	0.826154	0.912812	0.917145	0.90056
YDR436W	PPZ2	0.773783	0.891934	0.916237	0.838792
YDR437W	GPI19
YDR438W	THI74	0.798255	0.867271	0.871167	0.89312
YDR439W	LRS4	0.209237	0.451997	0.447474	0.299269
YDR440W	DOT1	-0.416435	0.105822	0.6615	0.458295
YDR441C	APT2	-0.138793	-0.183771	0.793704	0.676621
YDR442W	YDR442W
YDR443C	SSN2
YDR444W	YDR444W	0.379097	0.705937	0.400298	0.667653
YDR445C	YDR445C
YDR446W	ECM11	0.762301	0.927224	0.934365	0.819798
YDR447C	RPS17B
YDR448W	ADA2
YDR449C	UTP6
YDR450W	RPS18A	0.854193	0.943759	0.966638	0.933252
YDR451C	YHP1	0.799368	0.896284	0.902202	0.896847
YDR452W	PPN1	0.732425	0.837786	0.917849	0.855804
YDR453C	TSA2	0.751883	0.812971	0.942027	0.760568
YDR454C	GUK1	0.876454	0.931673	0.967451	0.948991
YDR455C	YDR455C
YDR456W	NHX1	0.702627	0.794752	0.837361	0.78268
YDR457W	TOM1	0.483773	-0.0606931	0.583259	0.308318
YDR458C	HEH2	0.678374	0.746388	0.777966	0.775679
YDR459C	PFA5	0.763575	0.890061	0.864735	0.839246
YDR460W	TFB3	0.662442	0.863723	0.75726	0.860254
YDR461W	MFA1
YDR462W	MRPL28	-0.108129	0.619276	0.70749	-0.0631927
YDR463W	STP1	0.766306	0.867996	0.869648	0.860829
YDR464W	SPP41	0.377158	0.27147	0.617711	0.690686
YDR465C	RMT2	0.859618	0.939423	0.95065	0.953633
YDR466W	PKH3	0.721316	0.848107	0.761696	0.823374
YDR467C	YDR467C
YDR468C	TLG1	-0.201333	-0.321055	0.54166	0.639356
YDR469W	SDC1	0.433215	0.511452	0.530839	0.616491
YDR470C	UGO1	0.484743	0.558847	0.617744	0.556245
YDR471W	RPL27B	0.830515	0.939285	0.969045	0.92074
YDR472W	TRS31	0.390997	0.603355	0.699286	0.500142
YDR473C	PRP3	0.706176	0.764684	0.764473	0.805225
YDR475C	JIP4	0.806607	0.899272	0.938196	0.855375
YDR476C	YDR476C	0.65356	0.77611	0.714595	0.767519
YDR477W	SNF1	-0.276881	0.541194	0.738383	0.0106975
YDR478W	SNM1	-0.0931738	0.562919	0.599112	-0.016987
YDR479C	PEX29	0.819577	0.921641	0.929989	0.896509
YDR480W	DIG2	0.752401	0.891515	0.879664	0.857278
YDR481C	PHO8	0.71274	0.911502	0.862242	0.893019
YDR482C	CWC21	0.67713	0.758647	0.829983	0.766051
YDR483W	KRE2	0.235542	0.445545	0.349186	0.374608
YDR484W	VPS52	0.674764	0.731753	0.701195	0.749843
YDR485C	VPS72	0.735872	0.825466	0.790564	0.824993
YDR486C	VPS60	0.0434589	0.401839	0.760758	0.279425
YDR487C	RIB3	0.165043	0.559709	0.493679	0.412966
YDR488C	PAC11	0.518998	0.560084	0.653903	0.592035
YDR489W	SLD5	0.485666	0.678832	0.623823	0.621078
YDR490C	PKH1	0.754938	0.884838	0.893384	0.846691
YDR491C	YDR491C
YDR492W	IZH1	0.223146	0.284801	0.757334	0.613276
YDR493W	MZM1	0.14262	0.386166	0.257669	0.250107
YDR494W	RSM28	0.405651	0.431781	0.409405	0.385959
YDR495C	VPS3	0.731439	0.820005	0.824652	0.811859
YDR496C	PUF6	0.871195	0.937177	0.960813	0.953362
YDR497C	ITR1	0.764237	0.901367	0.909838	0.864828
YDR498C	SEC20	0.472644	0.391726	0.561902	0.605252
YDR499W	LCD1	0.537627	0.650503	0.607077	0.603311
YDR500C	RPL37B
YDR501W	PLM2	0.676409	0.822028	0.815001	0.810306
YDR502C	SAM2	0.770636	0.891816	0.900655	0.868902
YDR503C	LPP1	0.531244	0.570422	0.564412	0.823316
YDR504C	SPG3
YDR505C	PSP1	0.609884	0.887399	0.835157	0.746986
YDR506C	GMC1
YDR507C	GIN4	0.0582614	0.640501	0.576287	0.451321
YDR508C	GNP1	0.691628	0.895301	0.905817	0.842833
YDR509W	YDR509W
YDR510W	SMT3	-0.160691	0.346355	0.571386	0.685096
YDR511W	SDH7	0.654437	0.796253	0.784046	0.594211
YDR512C	EMI1	0.734435	0.8971	0.882774	0.831574
YDR513W	GRX2	0.831638	0.927703	0.956503	0.912428
YDR514C	YDR514C	0.366576	0.498142	0.325208	0.541675
YDR515W	SLF1
YDR516C	EMI2	0.793353	0.918031	0.933912	0.865915
YDR517W	GRH1	0.679381	0.760302	0.864201	0.776209
YDR518W	EUG1	0.103911	0.334209	0.49486	0.299398
YDR519W	FPR2	-0.0841251	0.441344	0.139556	0.673174
YDR520C	URC2	0.710229	0.794904	0.826154	0.792197
YDR521W	YDR521W
YDR522C	SPS2
YDR523C	SPS1	-0.0306646	-0.121758	0.430676	0.795878
YDR524C	AGE1	0.303293	0.00460799	0.589656	0.675762
YDR525W	API2
YDR526C	YDR526C
YDR527W	RBA50	0.0296202	0.453547	0.712418	0.645658
YDR528W	HLR1	0.183345	0.609328	0.150156	0.528952
YDR529C	QCR7	0.771397	0.8911	0.946404	0.776872
YDR530C	APA2	0.843651	0.92622	0.945831	0.923388
YDR531W	CAB1	0.180424	0.118735	0.45701	0.580007
YDR532C	KRE28	0.666736	0.71774	0.831361	0.732759
YDR533C	HSP31	0.736846	0.923465	0.944054	0.816152
YDR534C	FIT1	0.638529	0.216949	0.73581	0.372741
YDR535C	YDR535C
YDR536W	STL1	0.788407	0.837712	0.821155	0.908522
YDR537C	YDR537C
YDR538W	PAD1	0.182067	0.356722	0.463584	0.155187
YDR539W	FDC1	0.574735	0.603648	0.775326	0.605003
YDR540C	IRC4
YDR541C	YDR541C
YDR542W	PAU10
YDR543C	YDR543C
YDR544C	YDR544C
YDR545W	YRF1-1
YEL001C	IRC22	0.559469	0.850133	0.901658	0.687286
YEL002C	WBP1	0.561605	0.50772	0.557956	0.564377
YEL003W	GIM4	0.784779	0.880988	0.871642	0.932496
YEL004W	YEA4	0.386501	0.712916	0.640048	0.565308
YEL005C	VAB2	0.667632	0.881297	0.927988	0.767238
YEL006W	YEA6	0.795044	0.903597	0.912638	0.874922
YEL007W	MIT1	0.168608	0.448408	0.626058	-0.102713
YEL008W	YEL008W
YEL009C	GCN4	0.367887	0.670429	0.719521	0.567353
YEL010W	YEL010W
YEL011W	GLC3	0.863631	0.941756	0.965078	0.932451
YEL012W	UBC8	0.828479	0.934504	0.951399	0.915772
YEL013W	VAC8	0.541249	0.732187	0.736911	0.581106
YEL014C	YEL014C
YEL015W	EDC3	0.409879	0.480971	0.5289	0.572505
YEL016C	NPP2	0.751972	0.888191	0.807116	0.883899
YEL017W	GTT3	0.686515	0.66516	0.84603	0.745546
YEL018W	EAF5	0.415695	0.839672	0.816943	0.594154
YEL019C	MMS21
YEL020C	PXP1	0.813837	0.907578	0.914424	0.917819
YEL021W	URA3
YEL022W	GEA2	0.685484	0.795505	0.820172	0.759723
YEL023C	YEL023C	0.687111	0.713051	0.798485	0.759335
YEL024W	RIP1	0.73244	0.887182	0.934175	0.776704
YEL025C	YEL025C	0.685135	0.865312	0.879482	0.729703
YEL026W	SNU13	0.878531	0.945774	0.969624	0.956242
YEL027W	VMA3	0.491988	0.798988	0.740541	0.641634
YEL028W	YEL028W
YEL029C	BUD16	0.399898	0.202261	0.651315	0.61677
YEL030W	ECM10	0.713753	0.592169	0.713416	0.875721
YEL031W	SPF1	0.84152	0.82673	0.875826	0.909373
YEL032W	MCM3	0.642364	0.7586	0.721687	0.774426
YEL033W	MTC7
YEL034W	HYP2	0.86464	0.942116	0.959145	0.94224
YEL035C	UTR5
YEL036C	ANP1	0.701128	0.885739	0.776895	0.902687
YEL037C	RAD23	0.810218	0.907171	0.888943	0.929912
YEL038W	UTR4	-0.158365	0.694315	0.668886	-0.205746
YEL039C	CYC7	0.81403	0.934666	0.950708	0.857379
YEL040W	UTR2	0.816434	0.926047	0.950415	0.934019
YEL041W	YEF1	0.835988	0.923543	0.935051	0.932032
YEL042W	GDA1	0.643957	0.862538	0.95918	0.741517
YEL043W	YEL043W	0.298729	0.496082	0.560022	0.45746
YEL044W	IES6	-0.060489	0.128008	0.494798	0.611797
YEL045C	YEL045C
YEL046C	GLY1	0.636816	0.850683	0.899647	0.757316
YEL047C	FRD1	0.228912	0.54241	0.342224	0.483228
YEL048C	TCA17
YEL049W	PAU2
YEL050C	RML2	0.64078	0.782485	0.764926	0.823108
YEL051W	VMA8	0.329878	0.534202	0.366862	0.723267
YEL052W	AFG1	0.722556	0.870191	0.82062	0.864064
YEL053C	MAK10	0.548913	0.817204	0.824347	0.622812
YEL054C	RPL12A	0.846891	0.940926	0.969006	0.931226
YEL055C	POL5	0.74948	0.910733	0.960755	0.833437
YEL056W	HAT2	0.366796	0.294966	0.503863	0.682233
YEL057C	SDD1
YEL058W	PCM1	-0.0346639	0.625883	0.334027	0.749681
YEL059W	HHY1
YEL060C	PRB1	0.849329	0.933883	0.936452	0.92332
YEL061C	CIN8	0.686763	0.811555	0.742692	0.79685
YEL062W	NPR2	0.712169	0.880607	0.885846	0.795087
YEL063C	CAN1	0.761467	0.901608	0.910981	0.838421
YEL064C	AVT2	0.787568	0.893781	0.898428	0.880462
YEL065W	SIT1	0.336009	0.787768	0.0642993	0.681862
YEL066W	HPA3	0.823227	0.919609	0.931278	0.891142
YEL067C	YEL067C
YEL068C	YEL068C	0.730831	0.804908	0.768619	0.863742
YEL069C	HXT13
YEL070W	DSF1
YEL071W	DLD3	0.757265	0.886389	0.86391	0.878958
YEL072W	RMD6	0.762686	0.894431	0.935773	0.855712
YEL073C	YEL073C	0.730661	0.892337	0.927784	0.805699
YEL074W	YEL074W
YEL075C	YEL075C
YEL076C	YEL076C
YEL077C	YEL077C
YER001W	MNN1	-0.123477	0.224245	0.801502	0.407237
YER002W	NOP16	0.834699	0.925638	0.934936	0.935781
YER003C	PMI40	0.280344	0.59242	0.704959	0.376926
YER004W	FMP52	0.252971	0.761458	0.437699	0.727158
YER005W	YND1	0.616044	0.745337	0.717264	0.640452
YER006W	NUG1	0.862213	0.937212	0.962528	0.945764
YER007W	PAC2	0.639236	0.597353	0.592531	0.826394
YER008C	SEC3	0.555225	0.548473	0.603109	0.498708
YER009W	NTF2	0.833288	0.90774	0.961556	0.883959
YER010C	YER010C	0.505603	0.823167	0.885094	0.505662
YER011W	TIR1	0.802376	0.918192	0.942757	0.877133
YER012W	PRE1	0.461291	0.347182	0.479465	0.0939853
YER013W	PRP22	0.656975	0.808315	0.673523	0.818741
YER014W	HEM14	0.728172	0.818938	0.816489	0.815395
YER015W	FAA2	0.806956	0.922482	0.927934	0.898562
YER016W	BIM1	0.26496	0.597091	0.55397	0.442131
YER017C	AFG3	0.566969	0.628687	0.632856	0.703857
YER018C	SPC25	0.781273	0.893145	0.89123	0.8482
YER019W	ISC1	0.605437	0.869226	0.764774	0.781404
YER020W	GPA2	0.798412	0.89729	0.935211	0.876355
YER021W	RPN3	0.396318	0.710411	0.595763	0.595653
YER022W	SRB4	0.576617	0.60431	0.808278	0.570137
YER023W	PRO3	0.237825	0.368365	0.408922	0.420249
YER024W	YAT2	0.839649	0.923069	0.947895	0.897846
YER025W	GCD11	0.820543	0.923794	0.932247	0.935019
YER026C	CHO1	0.78989	0.923269	0.933242	0.879956
YER027C	GAL83	-0.14294	0.292299	0.496075	0.209016
YER028C	MIG3	0.574484	0.554938	0.591369	0.637781
YER029C	SMB1	0.319924	-0.143225	0.321476	0.753321
YER030W	CHZ1	-0.0347338	-0.221583	0.698195	0.656383
YER031C	YPT31	0.768507	0.773652	0.81102	0.723694
YER032W	FIR1	0.455512	0.654968	0.588545	0.72677
YER033C	ZRG8	0.782141	0.904056	0.919504	0.872975
YER034W	YER034W	0.238875	0.638548	0.782048	0.44762
YER035W	EDC2	0.774741	0.917536	0.931274	0.820326
YER036C	ARB1	0.85633	0.931855	0.933492	0.950192
YER037W	PHM8	0.820436	0.935344	0.961889	0.912177
YER038C	KRE29	0.780648	0.840308	0.838231	0.834121
YER039C	HVG1
YER040W	GLN3	0.801247	0.888758	0.886072	0.868545
YER041W	YEN1	0.759712	0.864087	0.871813	0.856677
YER042W	MXR1	0.722961	0.893576	0.893712	0.836543
YER043C	SAH1	0.668197	0.907198	0.949069	0.716207
YER044C	ERG28	0.216616	0.74735	0.791864	0.589861
YER045C	ACA1	0.707501	0.816287	0.759096	0.839624
YER046W	SPO73	0.777321	0.921378	0.915581	0.830323
YER047C	SAP1	0.64649	0.623308	0.725767	0.639595
YER048C	CAJ1	0.372664	0.583129	0.489053	0.509977
YER049W	TPA1	0.859044	0.928991	0.959555	0.93648
YER050C	RSM18	0.0625586	0.234694	0.741924	0.535855
YER051W	JHD1	0.793828	0.894084	0.906843	0.88207
YER052C	HOM3	0.685219	0.845891	0.870954	0.749906
YER053C	PIC2	0.865177	0.939549	0.964835	0.932248
YER054C	GIP2	0.708545	0.937146	0.956237	0.743141
YER055C	HIS1	0.2652	0.697344	0.647893	0.797886
YER056C	FCY2	0.624962	0.749773	0.660669	0.431869
YER057C	HMF1	0.661335	0.843286	0.797207	0.812861
YER058W	PET117	0.797529	0.866271	0.890774	0.872301
YER059W	PCL6	0.767194	0.874774	0.905182	0.838515
YER060W	FCY21	0.231362	0.876269	0.814013	0.145471
YER061C	CEM1	0.762678	0.903582	0.873418	0.901725
YER062C	GPP2	0.476438	0.880602	0.908958	0.601351
YER063W	THO1	0.702191	0.851602	0.81834	0.820139
YER064C	VHR2	0.813862	0.911797	0.916548	0.907158
YER065C	ICL1	0.837088	0.907994	0.920656	0.898328
YER066W	RRT13
YER067W	RGI1	0.856573	0.934473	0.961983	0.928737
YER068W	MOT2	0.334033	0.0635376	0.244359	0.35476
YER069W	ARG5,6	0.822993	0.920754	0.929412	0.890682
YER070W	RNR1	0.562096	0.812296	0.92429	0.645073
YER071C	TDA2	0.738811	0.753054	0.806023	0.858679
YER072W	VTC1	-0.16655	0.754612	-0.0189928	0.792181
YER073W	ALD5	0.498934	0.711839	0.665427	0.64739
YER074W	RPS24A	0.85857	0.94418	0.96896	0.937311
YER075C	PTP3	0.580672	0.564219	0.672911	0.631909
YER076C	YER076C	-0.476198	0.251787	0.845095	0.210576
YER077C	MRX1	0.409571	0.414608	0.504827	0.438841
YER078C	ICP55	0.374563	0.519971	0.467496	0.441513
YER079W	YER079W	0.853338	0.939141	0.956959	0.925562
YER080W	AIM9	0.3551	0.759551	0.304157	0.730308
YER081W	SER3	-0.112176	0.870012	0.925973	-0.0226734
YER082C	UTP7	0.81933	0.924188	0.911794	0.918677
YER083C	GET2	0.552817	0.409475	0.682127	0.507024
YER084W	YER084W	0.777665	0.875326	0.931907	0.838363
YER085C	YER085C
YER086W	ILV1	0.0163798	0.62755	0.840388	0.392924
YER087W	AIM10	0.0110554	0.418653	0.827315	0.334897
YER088C	DOT6	0.770169	0.87742	0.849917	0.876059
YER089C	PTC2	0.00645075	-0.0239511	0.793284	0.634679
YER090W	TRP2	0.638015	0.541746	0.685242	0.655394
YER091C	MET6	0.805941	0.922398	0.928196	0.890245
YER092W	IES5	0.744272	0.886954	0.919829	0.839109
YER093C	TSC11	0.647441	0.596808	0.77863	0.662796
YER094C	PUP3	0.088635	0.407966	0.640251	0.255021
YER095W	RAD51	-0.184407	0.622217	0.792091	0.20316
YER096W	SHC1	0.705757	0.890584	0.930763	0.78315
YER097W	YER097W
YER098W	UBP9	0.776184	0.89136	0.918978	0.85568
YER099C	PRS2	-0.0634279	0.405538	0.478161	0.0590054
YER100W	UBC6	0.29687	0.457393	0.421832	0.300723
YER101C	AST2	0.756686	0.876014	0.87176	0.839176
YER102W	RPS8B	0.838283	0.941871	0.968799	0.927401
YER103W	SSA4	0.680955	0.824118	0.917189	0.759899
YER104W	RTT105	0.790068	0.896928	0.883142	0.905191
YER105C	NUP157	0.507857	0.536694	0.53063	0.567241
YER106W	MAM1
YER107C	GLE2	0.249715	0.659511	0.479137	0.5788
YER109C	FLO8
YER110C	KAP123	0.84968	0.933046	0.959327	0.928882
YER111C	SWI4	0.363819	0.725097	0.66683	0.351308
YER112W	LSM4	0.187517	0.505129	0.473271	0.452416
YER113C	TMN3	0.635139	0.780615	0.798775	0.757211
YER114C	BOI2	0.522756	0.189584	0.632564	0.501953
YER115C	SPR6	0.500692	0.39081	0.448747	0.573388
YER116C	SLX8
YER117W	RPL23B	0.853706	0.943745	0.969756	0.9332
YER118C	SHO1	0.665588	0.880938	0.926117	0.802923
YER119C	AVT6	0.830668	0.933157	0.948875	0.900654
YER120W	SCS2	0.207837	0.553057	0.332663	0.46249
YER121W	YER121W	0.773317	0.899008	0.953787	0.820104
YER122C	GLO3	0.471719	0.537093	0.64514	0.4033
YER123W	YCK3	0.325079	0.491811	0.386711	0.535146
YER124C	DSE1	0.79596	0.898956	0.895487	0.884736
YER125W	RSP5	0.47577	0.482386	0.377099	0.307113
YER126C	NSA2	0.856055	0.931978	0.941434	0.956854
YER127W	LCP5	0.832973	0.933961	0.930786	0.942512
YER128W	VFA1	0.718382	0.851268	0.814506	0.869569
YER129W	SAK1	0.39738	0.37594	0.726994	0.509817
YER130C	COM2	0.43747	0.447464	0.514894	0.640761
YER131W	RPS26B	0.839618	0.941577	0.969426	0.926492
YER132C	PMD1	0.66572	0.82426	0.781648	0.812601
YER133W	GLC7
YER134C	YER134C	-0.365941	-0.0828888	0.808205	0.409251
YER135C	YER135C
YER136W	GDI1	0.60696	0.748403	0.716838	0.644466
YER137C	YER137C	0.337479	0.0102684	0.369361	0.488671
YER138C	YER138C
YER139C	RTR1	0.747345	0.888885	0.905309	0.863346
YER140W	EMP65	0.669596	0.752645	0.713968	0.769029
YER141W	COX15	0.129939	0.820669	0.893988	0.138626
YER142C	MAG1	0.754501	0.901383	0.932353	0.844194
YER143W	DDI1	0.671343	0.838768	0.837978	0.705141
YER144C	UBP5	0.123016	0.687579	0.56353	-0.0109831
YER145C	FTR1	0.200119	0.746038	0.398241	0.793441
YER146W	LSM5	0.657718	0.71619	0.788318	0.711949
YER147C	SCC4	0.189446	0.0151215	0.8186	0.342825
YER148W	SPT15	0.666413	0.833765	0.858825	0.739046
YER149C	PEA2	0.0350944	0.438643	0.77392	0.455459
YER150W	SPI1	0.828796	0.922569	0.946944	0.915743
YER151C	UBP3	0.441311	0.80897	0.819584	0.529008
YER152C	YER152C	0.802355	0.922326	0.893354	0.887475
YER153C	PET122
YER154W	OXA1	0.60002	0.807966	0.822857	0.685359
YER155C	BEM2	0.28172	0.466853	0.382939	0.403948
YER156C	YER156C	0.827578	0.922676	0.928236	0.931609
YER157W	COG3	0.699465	0.766251	0.742339	0.803025
YER158C	YER158C	0.788578	0.916376	0.929597	0.852344
YER159C	BUR6	0.766831	0.840801	0.880341	0.816135
YER160C	YER160C
YER161C	SPT2	0.24097	0.176244	0.331172	0.3188
YER162C	RAD4	0.781514	0.907867	0.933771	0.843332
YER163C	GCG1	0.6244	0.802178	0.83864	0.733279
YER164W	CHD1	0.473177	0.506075	0.526341	0.571914
YER165W	PAB1	0.845505	0.921694	0.943058	0.937488
YER166W	DNF1	0.521048	0.53355	0.591916	0.767213
YER167W	BCK2	0.307555	0.475755	0.54551	0.39323
YER168C	CCA1	0.556095	0.736952	0.719317	0.778232
YER169W	RPH1	0.156637	0.641	0.812892	0.399351
YER170W	ADK2	0.655843	0.826812	0.77785	0.841167
YER171W	RAD3	0.0811977	0.522715	0.644707	0.226874
YER172C	BRR2	0.403345	0.330866	0.425308	0.556237
YER173W	RAD24	0.612511	0.524646	0.72523	0.636949
YER174C	GRX4	0.783242	0.811241	0.834867	0.829875
YER175C	TMT1	0.742877	0.921784	0.947589	0.855648
YER176W	ECM32	0.268296	0.325939	0.659349	0.592565
YER177W	BMH1	0.16866	0.887921	0.868688	0.0945795
YER178W	PDA1	0.395068	0.873716	0.523091	0.6344
YER179W	DMC1
YER180C	ISC10	0.637529	0.757026	0.735448	0.743803
YER181C	YER181C
YER182W	FMP10	0.176683	0.828141	0.891645	0.213612
YER183C	FAU1	0.423032	0.367725	0.46658	0.713083
YER184C	TOG1
YER185W	PUG1	0.751588	0.814095	0.897938	0.84661
YER186C	YER186C
YER187W	YER187W
YER188W	YER188W
YER189W	YER189W
YER190W	YRF1-2
YFL001W	DEG1	0.762498	0.898709	0.903119	0.863484
YFL002C	SPB4	0.641824	0.847389	0.792768	0.882177
YFL003C	MSH4
YFL004W	VTC2	-0.0365385	0.843206	0.00166867	0.883244
YFL005W	SEC4	0.524499	0.7789	0.713217	0.600124
YFL007W	BLM10	0.372821	0.437455	0.477813	0.408901
YFL008W	SMC1	0.258458	0.562324	0.542927	0.689398
YFL009W	CDC4	0.627133	0.725893	0.745551	0.706383
YFL010C	WWM1	0.711807	0.840286	0.801264	0.816325
YFL011W	HXT10
YFL012W	YFL012W
YFL013C	IES1	0.740976	0.885354	0.922221	0.841555
YFL014W	HSP12	0.742359	0.936442	0.959935	0.80334
YFL015C	YFL015C
YFL016C	MDJ1	0.0676828	0.379355	0.40609	0.724297
YFL017C	GNA1	0.129521	0.119862	0.497031	0.428768
YFL018C	LPD1	0.73385	0.856464	0.799377	0.90106
YFL019C	YFL019C
YFL020C	PAU5
YFL021W	GAT1	0.823927	0.932732	0.933307	0.89755
YFL022C	FRS2	0.84213	0.933971	0.960888	0.924922
YFL023W	BUD27	0.82901	0.910529	0.937794	0.905785
YFL024C	EPL1	0.421659	0.521489	0.66934	0.619606
YFL025C	BST1	0.355218	0.409423	0.431498	0.471511
YFL026W	STE2	0.797985	0.878989	0.911923	0.87811
YFL027C	GYP8	0.767646	0.879469	0.876045	0.851356
YFL028C	CAF16	0.736573	0.822174	0.902417	0.757756
YFL029C	CAK1	0.648159	0.840229	0.818126	0.733706
YFL030W	AGX1	0.817205	0.93746	0.956537	0.899406
YFL031W	HAC1	0.582562	0.83078	0.741852	0.793808
YFL032W	YFL032W
YFL033C	RIM15	0.8088	0.898687	0.910287	0.875476
YFL034W	MIL1	0.626388	0.765952	0.722259	0.739952
YFL036W	RPO41	0.0596943	0.563616	0.217203	0.611314
YFL037W	TUB2	0.106904	0.738562	0.818076	0.507612
YFL038C	YPT1	0.719756	0.824117	0.79889	0.826167
YFL039C	ACT1	0.689115	0.877154	0.908185	0.811801
YFL040W	YFL040W
YFL041W	FET5	0.398557	0.459753	0.486421	0.476108
YFL042C	LAM5	0.816919	0.906111	0.927168	0.891067
YFL044C	OTU1
YFL045C	SEC53	0.847858	0.924573	0.956971	0.910166
YFL046W	FMP32	0.351949	0.226009	0.852285	0.405952
YFL047W	RGD2	0.12256	0.308672	0.382646	0.610833
YFL048C	EMP47	0.450515	0.0239223	0.200569	0.732762
YFL049W	SWP82	0.452044	0.642012	0.845301	0.549149
YFL050C	ALR2	0.69387	0.851477	0.861536	0.807898
YFL051C	YFL051C
YFL052W	ZNF1
YFL053W	DAK2
YFL054C	AQY3	0.736698	0.806305	0.947242	0.762706
YFL055W	AGP3	0.802847	0.925696	0.938098	0.890528
YFL056C	AAD6
YFL057C	AAD16
YFL058W	THI5
YFL059W	SNZ3
YFL060C	SNO3
YFL061W	DDI2
YFL062W	COS4
YFL063W	YFL063W
YFL064C	YFL064C
YFL065C	YFL065C
YFL066C	YFL066C
YFL067W	YFL067W
YFL068W	YFL068W
YFR001W	LOC1	0.86292	0.924713	0.947573	0.944564
YFR002W	NIC96	0.459837	0.558755	0.557462	0.471584
YFR003C	YPI1	0.758238	0.907293	0.923415	0.846594
YFR004W	RPN11	0.27807	0.566262	0.247224	0.084553
YFR005C	SAD1	0.466327	0.347327	0.604917	0.524269
YFR006W	YFR006W	0.339981	0.333407	0.392462	0.386412
YFR007W	YFH7	0.668257	0.829178	0.739481	0.909981
YFR008W	FAR7	0.761349	0.902796	0.91714	0.876681
YFR009W	GCN20	0.733416	0.829256	0.862765	0.853077
YFR010W	UBP6	-0.162854	0.707423	0.678418	-0.161753
YFR011C	MIC19	0.60687	0.80388	0.748928	0.725548
YFR012W	DCV1
YFR013W	IOC3	0.378734	0.660667	0.524349	0.674114
YFR014C	CMK1	0.825491	0.922597	0.937307	0.909306
YFR015C	GSY1	0.822057	0.933891	0.957701	0.877559
YFR016C	AIP5	0.645178	0.825678	0.702009	0.859369
YFR017C	IGD1	0.866946	0.940071	0.961672	0.927639
YFR018C	YFR018C	0.0808718	0.0623949	0.577343	0.63723
YFR019W	FAB1	0.712426	0.826233	0.901877	0.789871
YFR020W	CSS2	0.694776	0.752274	0.822904	0.92228
YFR021W	ATG18	0.619249	0.810346	0.7506	0.715335
YFR022W	ROG3	0.831466	0.915558	0.921854	0.913835
YFR023W	PES4
YFR025C	HIS2	0.809082	0.912337	0.89768	0.887738
YFR026C	ULI1
YFR027W	ECO1	0.396907	0.670548	0.425495	0.543058
YFR028C	CDC14	0.666399	0.685241	0.757979	0.731037
YFR029W	PTR3	0.786926	0.864549	0.865408	0.857802
YFR030W	MET10	0.804583	0.920448	0.916359	0.89335
YFR031C	SMC2	0.501268	0.307056	0.622581	0.264441
YFR032C	RRT5
YFR033C	QCR6	0.705088	0.819579	0.766644	0.790177
YFR034C	PHO4	0.653431	0.809594	0.792946	0.7761
YFR035C	YFR035C
YFR036W	CDC26	0.169111	-0.26507	0.727066	0.319841
YFR037C	RSC8	0.318771	0.528773	0.692952	0.435465
YFR038W	IRC5	0.247573	0.496788	0.332587	0.357107
YFR039C	OSW7	0.595976	0.683407	0.692899	0.67548
YFR040W	SAP155	0.544491	0.627054	0.621723	0.62325
YFR041C	ERJ5	0.42866	0.681838	0.439435	0.603495
YFR042W	KEG1	0.657628	0.864555	0.830865	0.776519
YFR043C	IRC6	0.387922	0.728963	0.860497	0.48894
YFR044C	DUG1	0.294144	0.479762	0.530535	0.194818
YFR045W	YFR045W	0.678175	0.855613	0.81233	0.736705
YFR046C	CNN1	0.767743	0.879607	0.853609	0.869868
YFR047C	BNA6	0.78671	0.911076	0.932521	0.868277
YFR048W	RMD8	0.361262	0.465178	0.521088	0.450295
YFR049W	YMR31	0.805179	0.928811	0.914897	0.905575
YFR050C	PRE4	0.164515	0.454232	0.420247	0.31983
YFR051C	RET2	0.231421	0.0802447	0.837225	0.458116
YFR052W	RPN12	0.329133	0.497018	0.47773	0.497551
YFR053C	HXK1	0.650071	0.926499	0.956748	0.69507
YFR054C	YFR054C
YFR055W	IRC7	0.154568	0.71645	0.706432	0.433446
YFR056C	YFR056C
YFR057W	YFR057W
YGL001C	ERG26	0.517851	0.650018	0.683967	0.642322
YGL002W	ERP6	0.651104	0.806084	0.867461	0.727057
YGL003C	CDH1	0.726523	0.856367	0.879112	0.767238
YGL004C	RPN14	0.630264	0.806825	0.827171	0.755903
YGL005C	COG7	0.48614	0.632205	0.905916	0.623602
YGL006W	PMC1	0.850002	0.927267	0.9497	0.925044
YGL007W	BRP1
YGL008C	PMA1	0.543611	0.877062	0.883451	0.576614
YGL009C	LEU1	0.24663	0.507914	0.693411	0.500119
YGL010W	MPO1	0.662313	0.881891	0.927498	0.733257
YGL011C	SCL1	0.398713	0.483045	0.497346	0.345461
YGL012W	ERG4	0.587057	0.801808	0.863653	0.693106
YGL013C	PDR1	0.206163	0.322695	0.419993	0.360655
YGL014W	PUF4	0.725728	0.874719	0.835811	0.831268
YGL015C	YGL015C
YGL016W	KAP122	0.774415	0.907321	0.938398	0.867105
YGL017W	ATE1	0.549749	0.702227	0.728846	0.577761
YGL018C	JAC1	0.325832	0.670832	0.700687	0.354852
YGL019W	CKB1	0.458239	0.535513	0.492052	0.557946
YGL020C	GET1	0.334049	0.604542	0.749516	0.567178
YGL021W	ALK1	0.728131	0.886307	0.833027	0.846468
YGL022W	STT3	0.697001	0.848199	0.921236	0.792815
YGL023C	PIB2	0.661622	0.816687	0.736368	0.861277
YGL024W	YGL024W
YGL025C	PGD1	0.508717	0.797076	0.608809	0.617976
YGL026C	TRP5	0.571456	0.834475	0.649419	0.798882
YGL027C	CWH41	0.0315778	0.495374	0.445554	0.721433
YGL028C	SCW11	0.632802	0.739816	0.736341	0.79448
YGL029W	CGR1	0.860302	0.940099	0.955087	0.952997
YGL030W	RPL30	0.852431	0.943457	0.968551	0.933412
YGL031C	RPL24A	0.840816	0.942221	0.966497	0.927167
YGL032C	AGA2	0.749739	0.844802	0.846191	0.847756
YGL033W	HOP2
YGL034C	YGL034C
YGL035C	MIG1	0.11606	0.17061	0.838016	0.708484
YGL036W	YGL036W	-0.277215	0.583448	0.367711	0.388986
YGL037C	PNC1	0.750459	0.938703	0.957646	0.797305
YGL038C	OCH1	0.646534	0.900062	0.900728	0.73044
YGL039W	YGL039W	0.653692	0.638034	0.664667	0.69633
YGL040C	HEM2	0.399269	0.552944	0.450063	0.57636
YGL041C	YGL041C
YGL042C	YGL042C
YGL043W	DST1	0.730155	0.82935	0.858053	0.897868
YGL044C	RNA15	0.273791	0.167051	0.112802	0.384591
YGL045W	RIM8	0.770159	0.893885	0.926733	0.832532
YGL047W	ALG13	0.614927	0.880881	0.854979	0.730295
YGL048C	RPT6	0.0832894	0.301724	0.527278	0.484532
YGL049C	TIF4632	0.565888	0.720351	0.711774	0.752708
YGL050W	TYW3	0.165783	0.462509	0.339242	0.588953
YGL051W	MST27
YGL052W	YGL052W
YGL053W	PRM8
YGL054C	ERV14	0.432755	0.62217	0.487694	0.640337
YGL055W	OLE1	0.529136	0.782285	0.745597	0.711934
YGL056C	SDS23	0.335331	0.207894	0.381311	0.30913
YGL057C	GEP7	-0.352007	0.350998	0.841854	0.183574
YGL058W	RAD6	-0.204734	0.508369	0.741187	-0.0774505
YGL059W	PKP2	0.857889	0.928575	0.949046	0.929155
YGL060W	YBP2	0.231087	0.428366	0.371767	0.294741
YGL061C	DUO1	0.226642	0.438567	0.345405	0.564266
YGL062W	PYC1	0.828388	0.927908	0.931737	0.91035
YGL063W	PUS2
YGL064C	MRH4	0.631982	0.808939	0.824929	0.741126
YGL065C	ALG2	0.401533	0.0251784	0.210293	0.54977
YGL066W	SGF73	0.666068	0.833069	0.744881	0.842866
YGL067W	NPY1	0.407467	0.152571	0.464094	0.660273
YGL068W	MNP1	0.719448	0.830645	0.781825	0.853484
YGL069C	YGL069C
YGL070C	RPB9	0.579934	0.626094	0.741463	0.625772
YGL071W	AFT1	0.240809	0.189018	0.614059	0.453613
YGL072C	YGL072C
YGL073W	HSF1	0.689696	0.800095	0.790644	0.756947
YGL074C	YGL074C
YGL075C	MPS2	0.609253	0.767572	0.684057	0.809344
YGL076C	RPL7A
YGL077C	HNM1	0.776561	0.900003	0.851959	0.891953
YGL078C	DBP3	0.874371	0.941055	0.963808	0.951921
YGL079W	KXD1	0.584155	0.664062	0.658511	0.689599
YGL080W	MPC1	0.507999	0.695612	0.685038	0.627799
YGL081W	YGL081W	0.773245	0.905835	0.918588	0.909934
YGL082W	YGL082W	0.722523	0.87187	0.852032	0.827759
YGL083W	SCY1	0.239192	-0.0397682	0.54113	0.505387
YGL084C	GUP1	0.238746	0.164183	0.367019	0.392627
YGL085W	LCL3	0.585764	0.795466	0.786636	0.657298
YGL086W	MAD1	0.39856	0.367894	0.48379	0.628131
YGL087C	MMS2	0.794589	0.914415	0.941342	0.878259
YGL088W	YGL088W
YGL089C	MF(ALPHA)2
YGL090W	LIF1	0.830504	0.877514	0.888594	0.880704
YGL091C	NBP35	0.676482	0.848662	0.840042	0.796137
YGL092W	NUP145	0.375982	0.640251	0.85722	0.602534
YGL093W	SPC105	0.797069	0.893157	0.894074	0.874309
YGL094C	PAN2	0.309904	0.454578	0.394913	0.460819
YGL095C	VPS45	0.752674	0.8811	0.862103	0.856228
YGL096W	TOS8	0.820858	0.935317	0.943625	0.906812
YGL097W	SRM1	0.236458	0.733188	0.901983	0.401258
YGL098W	USE1
YGL099W	LSG1	0.848756	0.93159	0.941232	0.947578
YGL100W	SEH1	0.241992	0.424733	0.439266	0.37863
YGL101W	YGK1	0.630802	0.794475	0.679217	0.776212
YGL102C	YGL102C
YGL103W	RPL28	0.855981	0.944606	0.968083	0.932711
YGL104C	VPS73	0.625132	0.898028	0.928857	0.729678
YGL105W	ARC1	0.843315	0.902135	0.945903	0.898962
YGL106W	MLC1	0.618427	0.522854	0.696432	0.50281
YGL107C	RMD9
YGL108C	YGL108C	0.285458	0.69192	0.39643	0.786608
YGL109W	YGL109W
YGL110C	CUE3	0.698712	0.522209	0.578962	0.773748
YGL111W	NSA1	0.864426	0.925991	0.951	0.947559
YGL112C	TAF6	0.36401	0.525159	0.448381	0.502235
YGL113W	SLD3	0.501073	0.458613	0.517025	0.690436
YGL114W	YGL114W	0.789754	0.868124	0.849226	0.865915
YGL115W	SNF4	0.36564	0.574772	0.488712	0.642351
YGL116W	CDC20	0.421755	0.48759	0.602226	0.49482
YGL117W	YGL117W	0.721811	0.901232	0.931864	0.82172
YGL118C	YGL118C
YGL119W	COQ8	-0.0649086	0.45458	0.297705	0.824074
YGL120C	PRP43	0.860907	0.938394	0.953747	0.950658
YGL121C	GPG1	0.804989	0.924415	0.963403	0.896705
YGL122C	NAB2	0.717934	0.816349	0.766136	0.826245
YGL123W	RPS2	0.858236	0.944469	0.970373	0.933998
YGL124C	MON1	0.801981	0.910033	0.906858	0.879613
YGL125W	MET13	0.814777	0.923023	0.917803	0.895342
YGL126W	SCS3	-0.103638	-0.0494144	0.604338	0.560864
YGL127C	SOH1	0.62697	0.749489	0.780121	0.839591
YGL128C	CWC23	0.520754	0.66574	0.883798	0.648896
YGL129C	RSM23	0.310526	0.510988	0.410894	0.67951
YGL130W	CEG1	0.573418	0.648794	0.640853	0.662004
YGL131C	SNT2
YGL132W	YGL132W
YGL133W	ITC1	0.394657	0.426284	0.384184	0.459661
YGL134W	PCL10	0.688054	0.787071	0.759986	0.840253
YGL135W	RPL1B	0.840813	0.939338	0.968153	0.92769
YGL136C	MRM2	0.269207	-0.0525684	0.871323	0.495055
YGL137W	SEC27	0.621766	0.652623	0.659465	0.655553
YGL138C	YGL138C
YGL139W	FLC3	0.0683996	0.541741	0.594757	0.160707
YGL140C	YGL140C	0.74791	0.843879	0.860435	0.825875
YGL141W	HUL5	0.7828	0.896707	0.915513	0.843908
YGL142C	GPI10	0.573077	0.747467	0.785445	0.682548
YGL143C	MRF1	0.579357	0.745525	0.745798	0.59653
YGL144C	ROG1	0.666599	0.642415	0.702094	0.643724
YGL145W	TIP20	0.223845	0.431522	0.349999	0.559411
YGL146C	RRT6	0.62086	0.761381	0.909552	0.682662
YGL147C	RPL9A	0.853393	0.942188	0.96774	0.927755
YGL148W	ARO2	0.64566	0.839294	0.959434	0.760313
YGL149W	YGL149W
YGL150C	INO80	0.249861	0.367069	0.442736	0.474401
YGL151W	NUT1	0.388294	0.33851	0.254598	0.495529
YGL152C	YGL152C
YGL153W	PEX14	0.746273	0.88265	0.831488	0.868429
YGL154C	LYS5	0.779666	0.857153	0.939671	0.844549
YGL155W	CDC43	0.202	-0.280436	0.571012	0.428377
YGL156W	AMS1	0.834531	0.936133	0.953479	0.918474
YGL157W	ARI1	-0.210013	0.547303	0.681951	-0.140695
YGL158W	RCK1
[truncated: 4,651 more rows]

## Sheet: dataset_control
ORF	GeneName	cer	par	hyc	hyp
YAL001C	TFC3	0.898985	0.914546	0.89911	0.823224
YAL002W	VPS8	0.900561	0.937726	0.894869	0.910721
YAL003W	EFB1	0.981464	0.971935	0.98281	0.982877
YAL004W	YAL004W
YAL005C	SSA1	0.895164	0.896299	0.886909	0.855331
YAL007C	ERP2	0.846936	0.574785	0.817748	0.671966
YAL008W	FUN14	0.907707	0.932105	0.928497	0.949996
YAL009W	SPO7	0.784821	0.882323	0.774875	0.707392
YAL010C	MDM10	0.614985	0.699534	0.620142	0.302769
YAL011W	SWC3	0.320454	0.73065	0.361752	0.284555
YAL012W	CYS3	0.878616	0.895102	0.812638	0.767708
YAL013W	DEP1	0.677722	0.899264	0.83238	0.853573
YAL014C	SYN8	0.685279	0.916025	0.779068	0.806091
YAL015C	NTG1	0.819169	0.755157	0.816997	0.728409
YAL016W	TPD3	0.299121	0.746592	0.618445	0.467467
YAL017W	PSK1	0.936813	0.93928	0.946198	0.934499
YAL018C	LDS1	0.72191	0.707359	0.730021	0.40129
YAL019W	FUN30	0.902062	0.881171	0.902776	0.918907
YAL020C	ATS1
YAL021C	CCR4	0.539408	0.630866	0.321262	0.523218
YAL022C	FUN26	0.608487	0.876455	0.630954	0.828764
YAL023C	PMT2	0.967679	0.685326	0.955044	0.881732
YAL024C	LTE1	0.522831	0.770008	0.314468	0.447972
YAL025C	MAK16	0.964534	0.931937	0.962079	0.962705
YAL026C	DRS2	0.428743	0.809314	0.275167	0.381323
YAL027W	SAW1	0.663232	0.723464	0.662035	0.789944
YAL028W	FRT2	0.950854	0.940717	0.930613	0.954478
YAL029C	MYO4	0.710003	0.79642	0.787816	0.835869
YAL030W	SNC1	0.856221	0.903613	0.962236	0.8994
YAL031C	GIP4	0.855964	0.891951	0.917517	0.890678
YAL032C	PRP45	0.640453	0.775497	0.599829	0.572333
YAL033W	POP5	0.409413	0.854135	0.324216	0.811517
YAL034C	FUN19	0.921113	0.942922	0.901312	0.948151
YAL035W	FUN12	0.970288	0.965626	0.978412	0.95342
YAL036C	RBG1	0.960385	0.944331	0.9498	0.953305
YAL037W	YAL037W	0.693879	0.924776	0.329888	0.791653
YAL038W	CDC19	0.964571	0.957032	0.963906	0.967272
YAL039C	CYC3	0.931679	0.740571	0.57308	0.707585
YAL040C	CLN3	0.617081	0.701454	0.829957	0.767681
YAL041W	CDC24	0.422906	0.69188	0.570608	0.206025
YAL042W	ERV46	0.941879	0.870324	0.889409	0.835626
YAL043C	PTA1	0.820723	0.785936	0.336603	0.492387
YAL044C	GCV3	0.837545	0.958094	0.968829	0.918302
YAL045C	YAL045C
YAL046C	BOL3	0.311538	0.760046	0.57956	0.728025
YAL047C	SPC72	0.376714	0.738825	0.560224	0.49582
YAL048C	GEM1
YAL049C	AIM2	0.893813	0.932079	0.910613	0.830626
YAL051W	OAF1	0.695316	0.826313	0.529244	0.608894
YAL053W	FLC2	0.606663	0.891006	0.596726	0.671545
YAL054C	ACS1	0.888527	0.902868	0.907747	0.934931
YAL055W	PEX22	0.902246	0.859025	0.896694	0.841752
YAL056W	GPB2	0.917685	0.942448	0.940209	0.947885
YAL058W	CNE1	0.342426	0.77811	0.257127	0.510514
YAL059W	ECM1	0.941393	0.928223	0.951294	0.94681
YAL060W	BDH1	0.92484	0.963253	0.958985	0.961343
YAL061W	BDH2	0.974163	0.973951	0.971167	0.978583
YAL062W	GDH3	0.96829	0.96505	0.967988	0.967456
YAL063C	FLO9
YAL064W	YAL064W
YAL065C	YAL065C
YAL066W	YAL066W
YAL067C	SEO1	0.961314	0.954202	0.966971	0.964097
YAL068C	PAU8
YAL069W	YAL069W
YAR002W	NUP60	0.592073	0.613963	0.724474	0.53791
YAR003W	SWD1	0.763715	0.572923	0.83439	0.827226
YAR007C	RFA1	0.362115	0.717377	0.497547	0.511458
YAR008W	SEN34	0.727787	0.751457	0.606221	0.511255
YAR009C	YAR009C
YAR010C	YAR010C
YAR014C	BUD14	0.544804	0.598122	0.237982	0.34887
YAR015W	ADE1	0.538733	0.935831	0.686873	0.686797
YAR018C	KIN3	0.393626	0.858116	0.63728	0.606871
YAR019C	CDC15	0.809875	0.781765	0.834262	0.76114
YAR020C	PAU7
YAR023C	YAR023C
YAR027W	UIP3	0.923593	0.864138	0.882649	0.76247
YAR028W	YAR028W
YAR029W	YAR029W
YAR030C	YAR030C
YAR031W	PRM9
YAR033W	MST28	0.593186	0.717072	0.534213	0.367717
YAR035W	YAT1	0.818579	0.878735	0.89368	0.893109
YAR042W	SWH1	0.661722	0.686903	0.553694	0.231809
YAR047C	YAR047C
YAR050W	FLO1	0.493693	0.792414	0.88218	0.756347
YAR053W	YAR053W
YAR060C	YAR060C
YAR061W	YAR061W
YAR062W	YAR062W
YAR064W	YAR064W
YAR066W	YAR066W
YAR068W	YAR068W
YAR069C	YAR069C
YAR070C	YAR070C
YAR071W	PHO11
YAR073W	IMD1
YAR075W	YAR075W
YBL001C	ECM15	0.876439	0.943272	0.955569	0.846208
YBL002W	HTB2	0.918307	0.873575	0.844416	0.824528
YBL003C	HTA2	0.928745	0.865325	0.859269	0.844139
YBL004W	UTP20	0.924271	0.918313	0.95444	0.943988
YBL005W	PDR3
YBL006C	LDB7	0.731458	0.706146	0.839067	0.832287
YBL007C	SLA1	0.692964	0.884289	0.585351	0.709823
YBL008W	HIR1	0.535365	0.703097	0.366246	0.261533
YBL009W	ALK2	0.811255	0.730812	0.730939	0.491544
YBL010C	LAA2	0.47066	0.85358	0.290571	0.660315
YBL011W	SCT1	0.50279	0.634047	0.370203	0.259126
YBL012C	YBL012C
YBL013W	FMT1
YBL014C	RRN6	0.634415	0.774761	0.557826	0.767308
YBL015W	ACH1	0.921226	0.890874	0.928909	0.926736
YBL016W	FUS3	0.893576	0.635036	0.799786	0.879301
YBL017C	PEP1	0.623373	0.793694	0.837765	0.831208
YBL018C	POP8	0.732358	0.582286	0.771439	0.532148
YBL019W	APN2	0.90481	0.602372	0.855625	0.615585
YBL020W	RFT1	0.491033	0.365529	0.281716	0.34424
YBL021C	HAP3	0.572968	0.78022	0.644328	0.640013
YBL022C	PIM1	0.481055	0.799461	0.377983	0.396244
YBL023C	MCM2	0.578415	0.657502	0.305147	0.419738
YBL024W	NCL1	0.947779	0.960775	0.973907	0.950353
YBL025W	RRN10	0.62747	0.68097	0.699317	0.726949
YBL026W	LSM2	0.721738	0.807584	0.381784	0.459761
YBL027W	RPL19B
YBL028C	YBL028C	0.947057	0.923532	0.946872	0.958073
YBL029W	YBL029W	0.916417	0.936516	0.899858	0.921773
YBL030C	PET9	0.859326	0.789751	0.558039	0.6079
YBL031W	SHE1	0.55947	0.631369	0.274223	0.253117
YBL032W	HEK2	0.905187	0.671553	0.664962	0.658273
YBL033C	RIB1	0.935644	0.808448	0.808532	0.818476
YBL034C	STU1	0.404117	0.435826	0.278573	0.325505
YBL035C	POL12	0.738426	0.643291	0.340561	0.381663
YBL036C	YBL036C	0.725144	0.572703	0.581632	0.562999
YBL037W	APL3	0.520253	0.762813	0.463998	0.788825
YBL038W	MRPL16	0.782707	0.466533	0.553515	0.31877
YBL039C	URA7	0.964882	0.97073	0.972604	0.971121
YBL040C	ERD2	0.336015	0.756125	0.389598	0.284088
YBL041W	PRE7	0.344433	0.883022	0.405725	0.478452
YBL042C	FUI1	0.81357	0.917138	0.879632	0.950662
YBL043W	ECM13	0.923799	0.954452	0.902092	0.954407
YBL044W	YBL044W
YBL045C	COR1	0.951515	0.826924	0.922665	0.895959
YBL046W	PSY4	0.505834	0.477319	0.299213	0.460165
YBL047C	EDE1	0.905001	0.950367	0.943637	0.76118
YBL048W	RRT1
YBL049W	MOH1	0.974202	0.955251	0.972622	0.96114
YBL050W	SEC17	0.892893	0.917439	0.898395	0.926041
YBL051C	PIN4	0.581473	0.469212	0.480631	0.407954
YBL052C	SAS3	0.575681	0.776811	0.473344	0.536188
YBL053W	YBL053W
YBL054W	TOD6	0.917761	0.928762	0.952676	0.956557
YBL055C	YBL055C	0.456848	0.264416	0.606368	0.149903
YBL056W	PTC3	0.474245	0.422541	0.673728	0.359523
YBL057C	PTH2	0.547745	0.757917	0.580753	0.64011
YBL058W	SHP1	0.497315	0.67149	0.634875	0.751502
YBL059W	IAI11	0.707361	0.887945	0.793919	0.869616
YBL060W	YEL1	0.758096	0.585786	0.689186	0.354427
YBL061C	SKT5	0.590248	0.431903	0.77756	0.449917
YBL062W	YBL062W
YBL063W	KIP1	0.434708	0.61182	0.507737	0.740596
YBL064C	PRX1	0.969894	0.930967	0.967783	0.959308
YBL065W	YBL065W
YBL066C	SEF1	0.612784	0.697115	0.699267	0.619859
YBL067C	UBP13	0.606087	0.653685	0.423402	0.783826
YBL068W	PRS4	0.879563	0.853856	0.936338	0.931862
YBL069W	AST1	0.389869	0.51827	0.5868	0.604217
YBL070C	YBL070C
YBL071C	YBL071C
YBL072C	RPS8A	0.974265	0.958892	0.971493	0.97286
YBL073W	YBL073W
YBL074C	AAR2
YBL075C	SSA3	0.902562	0.856044	0.917137	0.929447
YBL076C	ILS1	0.89526	0.944622	0.96539	0.96504
YBL077W	YBL077W
YBL078C	ATG8	0.965637	0.963408	0.968671	0.970491
YBL079W	NUP170	0.681832	0.606606	0.674574	0.564952
YBL080C	PET112	0.839272	0.743696	0.835924	0.309568
YBL081W	YBL081W	0.932757	0.83742	0.946703	0.926625
YBL082C	ALG3	0.862106	0.689754	0.883237	0.87495
YBL083C	YBL083C
YBL084C	CDC27	0.773443	0.821888	0.718592	0.693434
YBL085W	BOI1	0.576693	0.588521	0.380882	0.41369
YBL086C	YBL086C	0.782106	0.660863	0.836171	0.674872
YBL087C	RPL23A
YBL088C	TEL1	0.60787	0.833838	0.735196	0.501403
YBL089W	AVT5	0.841619	0.90306	0.836287	0.891335
YBL090W	MRP21	0.501919	0.529938	0.2888	0.564168
YBL091C	MAP2	0.814031	0.506778	0.434698	0.629151
YBL092W	RPL32	0.977394	0.960352	0.974341	0.975526
YBL093C	ROX3	0.524146	0.665696	0.354281	0.692924
YBL094C	YBL094C
YBL095W	MRX3	0.911219	0.943526	0.923157	0.945513
YBL096C	YBL096C
YBL097W	BRN1
YBL098W	BNA4
YBL099W	ATP1	0.920122	0.745519	0.850054	0.82579
YBL100C	YBL100C
YBL101C	ECM21	0.919294	0.888085	0.92526	0.896954
YBL102W	SFT2	0.9563	0.893734	0.94338	0.868045
YBL103C	RTG3	0.820446	0.866124	0.874895	0.820831
YBL104C	SEA4	0.543777	0.559658	0.461829	0.325287
YBL105C	PKC1	0.412024	0.723864	0.665316	0.762625
YBL106C	SRO77	0.771646	0.805439	0.718106	0.830844
YBL107C	MIX23	0.632105	0.869825	0.598822	0.812072
YBL108W	YBL108W
YBL109W	YBL109W
YBL111C	YBL111C
YBL112C	YBL112C
YBL113C	YBL113C
YBR001C	NTH2	0.95435	0.940813	0.954851	0.968409
YBR002C	RER2	0.811985	0.740144	0.816079	0.795649
YBR003W	COQ1	0.778753	0.351319	0.774337	0.770009
YBR004C	GPI18	0.637292	0.512075	0.767469	0.651676
YBR005W	RCR1	0.899392	0.641361	0.79705	0.886035
YBR006W	UGA2	0.963808	0.953077	0.969835	0.956203
YBR007C	DSF2	0.815306	0.38226	0.744945	0.474882
YBR008C	FLR1	0.611348	0.911612	0.55821	0.620219
YBR009C	HHF1	0.808176	0.897387	0.732387	0.582971
YBR010W	HHT1	0.863655	0.921845	0.701621	0.565576
YBR011C	IPP1	0.760172	0.844531	0.797764	0.897796
YBR012C	YBR012C
YBR013C	YBR013C
YBR014C	GRX7	0.731384	0.873531	0.784451	0.608573
YBR015C	MNN2	0.58587	0.783933	0.435066	0.693695
YBR016W	YBR016W	0.802616	0.907849	0.877589	0.766012
YBR017C	KAP104	0.822505	0.858996	0.844677	0.807938
YBR018C	GAL7	0.892209	0.853984	0.892551	0.820087
YBR019C	GAL10	0.768488	0.732296	0.791618	0.863909
YBR020W	GAL1	0.820252	0.842204	0.787446	0.697104
YBR021W	FUR4	0.815785	0.753	0.880869	0.914074
YBR022W	POA1	0.849684	0.928468	0.793936	0.844783
YBR023C	CHS3	0.827921	0.682214	0.865878	0.554545
YBR024W	SCO2	0.871223	0.594693	0.789797	0.735361
YBR025C	OLA1	0.981999	0.968418	0.960202	0.956956
YBR026C	ETR1	0.947051	0.943625	0.950781	0.960328
YBR027C	YBR027C
YBR028C	YPK3	0.518772	0.602479	0.718914	0.470473
YBR029C	CDS1	0.627914	0.835495	0.628915	0.730669
YBR030W	RKM3	0.624444	0.508586	0.469843	0.618741
YBR031W	RPL4A
YBR032W	YBR032W
YBR033W	EDS1	0.93875	0.881353	0.912212	0.857676
YBR034C	HMT1	0.91924	0.944314	0.94293	0.955706
YBR035C	PDX3	0.892713	0.971662	0.959282	0.941566
YBR036C	CSG2	0.709701	0.938599	0.715812	0.788451
YBR037C	SCO1	0.834698	0.830686	0.855396	0.596637
YBR038W	CHS2	0.461017	0.647459	0.421369	0.586238
YBR039W	ATP3	0.878451	0.850978	0.826914	0.839782
YBR040W	FIG1
YBR041W	FAT1	0.419209	0.30394	0.326558	0.31848
YBR042C	CST26	0.768606	0.624386	0.645985	0.731774
YBR043C	QDR3	0.947737	0.977427	0.956446	0.961462
YBR044C	TCM62	0.704973	0.842814	0.508261	0.803479
YBR045C	GIP1
YBR046C	ZTA1	0.925388	0.957418	0.95689	0.949363
YBR047W	FMP23	0.934055	0.951985	0.957741	0.942593
YBR048W	RPS11B
YBR049C	REB1	0.435329	0.664727	0.512967	0.479638
YBR050C	REG2	0.938287	0.888094	0.926447	0.922472
YBR051W	YBR051W
YBR052C	RFS1	0.940965	0.961441	0.951553	0.970803
YBR053C	YBR053C	0.955565	0.940716	0.962691	0.968071
YBR054W	YRO2	0.910109	0.892164	0.916774	0.893624
YBR055C	PRP6	0.330186	0.573064	0.404677	0.665116
YBR056W	YBR056W	0.957291	0.881068	0.955162	0.949758
YBR057C	MUM2	0.753829	0.810911	0.720558	0.836898
YBR058C	UBP14	0.592478	0.87161	0.508585	0.774498
YBR059C	AKL1	0.76013	0.564656	0.83926	0.8148
YBR060C	ORC2	0.550717	0.571443	0.669978	0.556643
YBR061C	TRM7	0.852948	0.951599	0.869489	0.935259
YBR062C	YBR062C	0.843847	0.371173	0.843279	0.606012
YBR063C	YBR063C	0.811401	0.842383	0.619701	0.722674
YBR064W	YBR064W
YBR065C	ECM2
YBR066C	NRG2	0.906904	0.89293	0.932625	0.940553
YBR067C	TIP1	0.94706	0.897247	0.869756	0.834046
YBR068C	BAP2	0.898533	0.96745	0.955658	0.935644
YBR069C	TAT1	0.964052	0.972196	0.96446	0.965771
YBR070C	ALG14	0.616617	0.536213	0.569386	0.584033
YBR071W	YBR071W	0.281961	0.683074	0.740429	0.756083
YBR072W	HSP26	0.962047	0.749535	0.957628	0.938009
YBR073W	RDH54	0.513933	0.67312	0.500377	0.413554
YBR074W	PFF1	0.542916	0.550748	0.46128	0.498173
YBR076W	ECM8	0.652705	0.793006	0.69762	0.733051
YBR077C	SLM4	0.887323	0.839132	0.929164	0.898063
YBR078W	ECM33	0.877852	0.820156	0.921704	0.685782
YBR079C	RPG1	0.972164	0.963877	0.971124	0.948722
YBR080C	SEC18	0.616849	0.216468	0.752832	0.451034
YBR081C	SPT7	0.584262	0.695473	0.285125	0.409625
YBR082C	UBC4	0.969946	0.951135	0.963394	0.966151
YBR083W	TEC1	0.670311	0.667911	0.542379	0.457015
YBR084W	MIS1	0.96474	0.960502	0.969099	0.95861
YBR085W	AAC3	0.835278	0.85429	0.793997	0.89123
YBR086C	IST2	0.745313	0.705995	0.509002	0.469294
YBR087W	RFC5	0.66436	0.574077	0.685311	0.518579
YBR088C	POL30	0.877707	0.82629	0.886819	0.927138
YBR089W	YBR089W
YBR090C	YBR090C
YBR091C	TIM12	0.587025	0.903408	0.753939	0.628515
YBR092C	PHO3	0.966033	0.949485	0.968815	0.914344
YBR093C	PHO5	0.734118	0.87242	0.871953	0.901887
YBR094W	PBY1	0.3252	0.596074	0.453913	0.512946
YBR095C	RXT2	0.577344	0.817461	0.710109	0.820021
YBR096W	YBR096W	0.461945	0.7025	0.539193	0.785779
YBR097W	VPS15	0.860558	0.824086	0.874471	0.803056
YBR098W	MMS4	0.733645	0.731656	0.722294	0.654239
YBR099C	YBR099C
YBR101C	FES1	0.770548	0.885046	0.801174	0.890109
YBR102C	EXO84	0.733051	0.774556	0.778449	0.649954
YBR103W	SIF2	0.891813	0.919568	0.900559	0.653049
YBR104W	YMC2	0.710129	0.827983	0.759472	0.649166
YBR105C	VID24	0.931433	0.93057	0.876921	0.932766
YBR106W	SND3	0.966613	0.949939	0.968155	0.962994
YBR107C	IML3	0.809208	0.840165	0.799253	0.906599
YBR108W	AIM3	0.863124	0.878447	0.874408	0.76479
YBR109C	CMD1	0.76922	0.82421	0.866553	0.516553
YBR110W	ALG1	0.294424	0.762081	0.557787	0.793348
YBR111C	YSA1	0.851113	0.867807	0.871587	0.848177
YBR112C	CYC8	0.670541	0.812862	0.472784	0.526228
YBR113W	YBR113W
YBR114W	RAD16	0.909579	0.885981	0.75903	0.892539
YBR115C	LYS2	0.881774	0.96713	0.91607	0.94588
YBR116C	YBR116C
YBR117C	TKL2	0.950291	0.900373	0.946883	0.962637
YBR118W	TEF2	0.973537	0.947889	0.959773	0.95961
YBR119W	MUD1	0.776492	0.285879	0.77099	0.281698
YBR120C	CBP6	0.812895	0.693054	0.783812	0.43369
YBR121C	GRS1	0.978918	0.969647	0.97721	0.981149
YBR122C	MRPL36	0.543324	0.811501	0.388652	0.49835
YBR123C	TFC1	0.546406	0.331987	0.615644	0.44823
YBR124W	YBR124W
YBR125C	PTC4	0.332922	0.243303	0.252272	0.377116
YBR126C	TPS1	0.978811	0.949692	0.962833	0.959562
YBR127C	VMA2	0.809452	0.8482	0.415807	0.693899
YBR128C	ATG14	0.963582	0.916986	0.961746	0.934884
YBR129C	OPY1	0.841773	0.687275	0.775746	0.563734
YBR130C	SHE3	0.856224	0.404152	0.711193	0.283512
YBR131W	CCZ1	0.94912	0.752459	0.938201	0.677485
YBR132C	AGP2	0.954541	0.936281	0.954402	0.956611
YBR133C	HSL7	0.597287	0.771343	0.527696	0.788411
YBR134W	YBR134W
YBR135W	CKS1	0.767392	0.325642	0.723771	0.203478
YBR136W	MEC1	0.756596	0.822483	0.759784	0.682869
YBR137W	YBR137W	0.926314	0.812379	0.933014	0.821131
YBR138C	YBR138C	0.910999	0.90745	0.935187	0.900225
YBR139W	ATG42	0.960119	0.964901	0.971651	0.969359
YBR140C	IRA1	0.902478	0.849183	0.836921	0.810539
YBR141C	BMT2	0.900263	0.890155	0.919805	0.935836
YBR142W	MAK5	0.946962	0.960598	0.961826	0.959843
YBR143C	SUP45	0.962877	0.958319	0.972541	0.918804
YBR144C	YBR144C
YBR145W	ADH5	0.953076	0.694599	0.940898	0.814559
YBR146W	MRPS9	0.134187	0.650011	0.43267	0.289697
YBR147W	RTC2	0.980583	0.964737	0.975938	0.970199
YBR148W	YSW1	0.926033	0.581488	0.890693	0.834729
YBR149W	ARA1	0.976088	0.975601	0.959017	0.960307
YBR150C	TBS1	0.847336	0.92231	0.89081	0.904571
YBR151W	APD1	0.588257	0.908737	0.624146	0.296593
YBR152W	SPP381
YBR153W	RIB7	0.66723	0.603639	0.256823	0.215181
YBR154C	RPB5	0.904014	0.969246	0.97188	0.972434
YBR155W	CNS1	0.92391	0.877034	0.944663	0.945476
YBR156C	SLI15	0.559288	0.673479	0.387008	0.492104
YBR157C	ICS2
YBR158W	AMN1	0.531603	0.326104	0.526956	0.357768
YBR159W	IFA38	0.855205	0.383972	0.460268	0.281756
YBR160W	CDC28	0.414753	0.866786	0.38289	0.58397
YBR161W	CSH1	0.65522	0.617958	0.725918	0.676918
YBR162C	TOS1	0.804982	0.912641	0.683224	0.754723
YBR163W	EXO5	0.625896	0.594466	0.696356	0.781751
YBR164C	ARL1
YBR165W	UBS1	0.618432	0.346817	0.740732	0.296163
YBR166C	TYR1	0.454929	0.550131	0.307761	0.58293
YBR167C	POP7	0.540544	0.434121	0.409858	0.274582
YBR168W	PEX32	0.851103	0.894602	0.79742	0.877902
YBR169C	SSE2	0.953253	0.946106	0.942458	0.953565
YBR170C	NPL4	0.800094	0.346847	0.818456	0.802692
YBR171W	SEC66	0.938294	0.786282	0.856649	0.662227
YBR172C	SMY2	0.777127	0.688723	0.874681	0.76934
YBR173C	UMP1	0.784837	0.439725	0.290197	0.773503
YBR174C	YBR174C
YBR175W	SWD3	0.369446	0.2294	0.47268	0.488238
YBR176W	ECM31	0.155786	0.420585	0.216527	0.317899
YBR177C	EHT1	0.90923	0.960665	0.957542	0.953565
YBR178W	YBR178W
YBR179C	FZO1	0.612756	0.57501	0.564779	0.399109
YBR180W	DTR1	0.736782	0.89856	0.688275	0.851825
YBR181C	RPS6B
YBR182C	SMP1	0.765947	0.804743	0.687809	0.723491
YBR183W	YPC1	0.948754	0.891395	0.958756	0.934776
YBR184W	YBR184W	0.587328	0.651181	0.74131	0.721446
YBR185C	MBA1	0.340813	0.686407	0.247348	0.42646
YBR186W	PCH2
YBR187W	GDT1	0.895378	0.925295	0.904537	0.873774
YBR188C	NTC20	0.446927	0.34852	0.410963	0.355133
YBR189W	RPS9B
YBR190W	YBR190W
YBR191W	RPL21A	0.976423	0.954858	0.972616	0.972884
YBR192W	RIM2	0.71089	0.871	0.866985	0.899367
YBR193C	MED8	0.560216	0.606311	0.674932	0.666851
YBR194W	AIM4	0.637076	0.494438	0.567697	0.608509
YBR195C	MSI1	0.453294	0.52538	0.445293	0.463143
YBR196C	PGI1	0.915025	0.950629	0.948915	0.936222
YBR197C	YBR197C
YBR198C	TAF5	0.43861	0.368715	0.369511	0.324219
YBR199W	KTR4	0.885824	0.844455	0.888534	0.917094
YBR200W	BEM1	0.751374	0.615472	0.645346	0.573569
YBR201W	DER1	0.776262	0.89618	0.772654	0.839671
YBR202W	MCM7	0.586439	0.855158	0.783294	0.790713
YBR203W	COS111	0.944156	0.67192	0.911038	0.775792
YBR204C	LDH1	0.918639	0.851282	0.921384	0.893015
YBR205W	KTR3	0.710671	0.926708	0.791948	0.879164
YBR206W	YBR206W
YBR207W	FTH1	0.683435	0.845069	0.829944	0.712155
YBR208C	DUR1,2	0.942439	0.961683	0.93524	0.96313
YBR209W	YBR209W
YBR210W	ERV15	0.725621	0.702194	0.795005	0.360901
YBR211C	AME1	0.856853	0.840181	0.877087	0.845469
YBR212W	NGR1	0.900246	0.821645	0.909766	0.831156
YBR213W	MET8	0.90334	0.9473	0.940434	0.952647
YBR214W	SDS24	0.961572	0.942541	0.964296	0.959309
YBR215W	HPC2	0.40163	0.811393	0.480496	0.414544
YBR216C	YBP1	0.879874	0.750076	0.877666	0.797455
YBR217W	ATG12	0.857263	0.791537	0.846055	0.703817
YBR218C	PYC2	0.86385	0.77051	0.911513	0.805783
YBR219C	YBR219C
YBR220C	YBR220C	0.493804	0.315678	0.508532	0.556936
YBR221C	PDB1	0.638406	0.918523	0.826489	0.832113
YBR222C	PCS60	0.687313	0.951742	0.842713	0.927803
YBR223C	TDP1	0.870331	0.785022	0.918594	0.909522
YBR224W	YBR224W
YBR225W	YBR225W	0.732475	0.831782	0.844276	0.871666
YBR226C	YBR226C
YBR227C	MCX1	0.563777	0.865693	0.393824	0.64326
YBR228W	SLX1	0.839891	0.903639	0.839721	0.866913
YBR229C	ROT2	0.304458	0.198264	0.644405	0.469719
YBR230C	OM14	0.969051	0.905079	0.95163	0.955893
YBR231C	SWC5	0.721799	0.755707	0.647688	0.835817
YBR232C	YBR232C
YBR233W	PBP2	0.52651	0.767937	0.66044	0.717669
YBR234C	ARC40	0.921365	0.880076	0.847982	0.81395
YBR235W	VHC1	0.901732	0.953285	0.910238	0.9305
YBR236C	ABD1	0.654984	0.764478	0.692685	0.702444
YBR237W	PRP5	0.775657	0.551654	0.757785	0.301861
YBR238C	YBR238C	0.790992	0.837344	0.910186	0.901447
YBR239C	ERT1	0.515054	0.542573	0.261058	0.345051
YBR240C	THI2
YBR241C	YBR241C	0.960104	0.936327	0.968161	0.958763
YBR242W	YBR242W	0.849163	0.658492	0.877696	0.685987
YBR243C	ALG7	0.615762	0.65719	0.101517	0.368902
YBR244W	GPX2	0.83523	0.949181	0.769437	0.955969
YBR245C	ISW1	0.616362	0.527991	0.568903	0.571267
YBR246W	RRT2	0.653514	0.724021	0.545811	0.721486
YBR247C	ENP1	0.942344	0.950342	0.969097	0.963551
YBR248C	HIS7	0.79301	0.883064	0.833667	0.811517
YBR249C	ARO4	0.9028	0.661212	0.916554	0.818931
YBR250W	SPO23
YBR251W	MRPS5	0.44227	0.605412	0.332891	0.303637
YBR252W	DUT1	0.955018	0.949672	0.871308	0.959228
YBR253W	SRB6	0.755116	0.79899	0.743089	0.66563
YBR254C	TRS20	0.331633	0.822391	0.317392	0.750459
YBR255W	MTC4	0.883406	0.803292	0.842634	0.874833
YBR256C	RIB5	0.977716	0.92876	0.947139	0.926229
YBR257W	POP4	0.317066	0.502222	0.311131	0.657995
YBR258C	SHG1
YBR259W	YBR259W	0.627545	0.475079	0.670592	0.648731
YBR260C	RGD1	0.539493	0.705321	0.490959	0.61179
YBR261C	TAE1	0.804756	0.910252	0.892533	0.931109
YBR262C	MIC12	0.769674	0.91608	0.717323	0.7104
YBR263W	SHM1	0.965696	0.956579	0.891367	0.917081
YBR264C	YPT10	0.813534	0.270752	0.83948	0.363792
YBR265W	TSC10	0.727427	0.668674	0.606539	0.537336
YBR266C	SLM6
YBR267W	REI1	0.962228	0.934672	0.970808	0.965363
YBR268W	MRPL37	0.376538	0.585898	0.53695	0.492401
YBR269C	SDH8	0.939501	0.963978	0.950326	0.966025
YBR270C	BIT2	0.923197	0.562409	0.864717	0.54124
YBR271W	EFM2	0.876313	0.836818	0.923303	0.86133
YBR272C	HSM3	0.902189	0.637365	0.910046	0.8176
YBR273C	UBX7	0.486135	0.422709	0.811265	0.758543
YBR274W	CHK1	0.799276	0.33192	0.719065	0.518814
YBR275C	RIF1	0.570174	0.714015	0.229289	0.316446
YBR276C	PPS1	0.504163	0.523709	0.350262	0.219381
YBR277C	YBR277C
YBR278W	DPB3	0.838798	0.882356	0.848013	0.837586
YBR279W	PAF1	0.311371	0.173851	0.318414	0.125986
YBR280C	SAF1	0.935745	0.95658	0.947725	0.969814
YBR281C	DUG2	0.788462	0.835017	0.694381	0.802961
YBR282W	MRPL27	0.171718	0.904594	0.374277	0.565441
YBR283C	SSH1	0.963523	0.86314	0.949733	0.824207
YBR284W	YBR284W	0.883574	0.607824	0.7474	0.872352
YBR285W	YBR285W	0.972713	0.962448	0.97212	0.976807
YBR286W	APE3	0.834241	0.84351	0.808857	0.826622
YBR287W	YBR287W	0.927275	0.965703	0.948899	0.953369
YBR288C	APM3	0.432275	0.543689	0.36419	0.530725
YBR289W	SNF5	0.640621	0.817227	0.505479	0.639841
YBR290W	BSD2	0.753558	0.776693	0.776333	0.693947
YBR291C	CTP1	0.902032	0.959205	0.906806	0.930741
YBR292C	YBR292C
YBR293W	VBA2	0.943926	0.955899	0.954915	0.963934
YBR294W	SUL1	0.964644	0.963134	0.962461	0.969201
YBR295W	PCA1	0.892657	0.929454	0.870628	0.901976
YBR296C	PHO89	0.894204	0.811542	0.905122	0.816294
YBR297W	MAL33
YBR298C	MAL31
YBR299W	MAL32
YBR300C	YBR300C
YBR301W	PAU24
YBR302C	COS2
YCL001W	RER1	0.627167	0.743937	0.585296	0.505788
YCL002C	YCL002C	0.505137	0.52307	0.636026	0.467817
YCL004W	PGS1
YCL005W	LDB16	0.301354	0.486788	0.237214	0.22019
YCL007C	YCL007C
YCL008C	STP22	0.915268	0.476438	0.830174	0.703239
YCL009C	ILV6	0.696228	0.872278	0.921651	0.776997
YCL010C	SGF29	0.767386	0.633653	0.748966	0.712975
YCL011C	GBP2	0.784811	0.813794	0.674994	0.634729
YCL014W	BUD3	0.534195	0.60736	0.422816	0.462823
YCL016C	DCC1	0.813662	0.859224	0.740155	0.877002
YCL017C	NFS1	0.368891	0.838673	0.482867	0.8146
YCL018W	LEU2	0.40628	0.861111	0.760998	0.80346
YCL019W	YCL019W
YCL020W	YCL020W
YCL022C	YCL022C
YCL023C	YCL023C
YCL024W	KCC4	0.489737	0.556801	0.430936	0.227362
YCL025C	AGP1	0.969291	0.969064	0.969684	0.963425
YCL027W	FUS1	0.901894	0.781236	0.881481	0.508921
YCL028W	RNQ1	0.512268	0.550069	0.368563	0.513054
YCL029C	BIK1	0.450643	0.429356	0.301025	0.320685
YCL030C	HIS4	0.926729	0.961622	0.905015	0.902082
YCL031C	RRP7	0.88423	0.727346	0.774264	0.858255
YCL032W	STE50	0.767377	0.841599	0.771057	0.83375
YCL033C	MXR2	0.882147	0.941901	0.923334	0.967514
YCL034W	LSB5	0.95886	0.891271	0.950366	0.879714
YCL035C	GRX1	0.924736	0.959425	0.945051	0.940787
YCL036W	GFD2	0.810992	0.922703	0.92388	0.908244
YCL037C	SRO9	0.952727	0.942417	0.948457	0.954036
YCL038C	ATG22	0.936076	0.939691	0.944848	0.956136
YCL039W	GID7	0.929024	0.909372	0.944473	0.921827
YCL040W	GLK1	0.980106	0.928268	0.968367	0.958742
YCL041C	YCL041C
YCL042W	YCL042W
YCL043C	PDI1	0.937367	0.909772	0.86006	0.938066
YCL044C	MGR1	0.359183	0.731725	0.261965	0.533974
YCL045C	EMC1	0.786585	0.673281	0.733657	0.613854
YCL046W	YCL046W
YCL047C	POF1	0.529962	0.700852	0.580879	0.546348
YCL048W	SPS22
YCL049C	YCL049C	0.874014	0.687287	0.842316	0.840812
YCL050C	APA1	0.903768	0.961743	0.915439	0.970971
YCL051W	LRE1	0.703511	0.644827	0.768557	0.598964
YCL052C	PBN1	0.902543	0.798055	0.906654	0.890185
YCL054W	SPB1	0.965386	0.939593	0.964659	0.96302
YCL055W	KAR4	0.225676	0.223681	0.291084	0.341616
YCL056C	PEX34	0.813733	0.809591	0.826263	0.595205
YCL057W	PRD1	0.544484	0.817133	0.374546	0.554768
YCL058C	FYV5
YCL059C	KRR1	0.934494	0.93813	0.964688	0.963336
YCL061C	MRC1	0.407307	0.465071	0.359337	0.249453
YCL063W	VAC17	0.706197	0.691025	0.392899	0.189058
YCL064C	CHA1	0.954519	0.913502	0.848825	0.874859
YCL065W	YCL065W
YCL066W	HMLALPHA1
YCL067C	HMLALPHA2
YCL068C	YCL068C
YCL069W	VBA3
YCL074W	YCL074W
YCL075W	YCL075W
YCL076W	YCL076W
YCR001W	YCR001W
YCR002C	CDC10	0.653803	0.680952	0.75237	0.549995
YCR003W	MRPL32	0.28011	0.636579	0.34678	0.680934
YCR004C	YCP4	0.964575	0.929395	0.927515	0.937308
YCR005C	CIT2	0.972334	0.976653	0.961543	0.966216
YCR006C	YCR006C
YCR007C	YCR007C
YCR008W	SAT4	0.447811	0.725803	0.42228	0.487906
YCR009C	RVS161	0.921866	0.834895	0.879407	0.836246
YCR010C	ADY2	0.875232	0.876582	0.888652	0.914265
YCR011C	ADP1	0.934425	0.933796	0.949513	0.931463
YCR012W	PGK1	0.923541	0.924478	0.898774	0.898399
YCR013C	YCR013C
YCR014C	POL4	0.616437	0.695798	0.563566	0.550613
YCR015C	CTO1	0.908006	0.705334	0.881691	0.798951
YCR016W	YCR016W	0.932365	0.881948	0.940351	0.939887
YCR017C	CWH43	0.508715	0.712586	0.230017	0.149736
YCR018C	SRD1
YCR019W	MAK32	0.761447	0.775995	0.684051	0.295545
YCR020C	PET18	0.942343	0.75513	0.901005	0.900985
YCR021C	HSP30	0.918063	0.880237	0.890436	0.914102
YCR022C	YCR022C
YCR023C	YCR023C	0.851381	0.918006	0.872526	0.919783
YCR024C	SLM5	0.824403	0.3704	0.635061	0.514403
YCR025C	YCR025C
YCR026C	NPP1	0.902639	0.635657	0.780295	0.681587
YCR027C	RHB1	0.527745	0.562916	0.603177	0.232114
YCR028C	FEN2	0.491781	0.503855	0.574862	0.224393
YCR030C	SYP1	0.797061	0.704547	0.887822	0.829993
YCR031C	RPS14A
YCR032W	BPH1	0.817327	0.842298	0.831072	0.895728
YCR033W	SNT1	0.83202	0.82537	0.772521	0.589555
YCR034W	ELO2	0.942197	0.950242	0.935142	0.949526
YCR035C	RRP43	0.672628	0.661145	0.821401	0.6706
YCR036W	RBK1	0.752949	0.761391	0.700716	0.771768
YCR037C	PHO87	0.719493	0.485451	0.313462	0.625483
YCR038C	BUD5	0.885263	0.867672	0.870313	0.825805
YCR039C	MATALPHA2
YCR040W	MATALPHA1
YCR041W	YCR041W
YCR042C	TAF2	0.361104	0.539856	0.455143	0.187913
YCR043C	YCR043C	0.626104	0.778404	0.658703	0.779325
YCR044C	PER1	0.422559	0.519942	0.525075	0.504514
YCR045C	RRT12
YCR046C	IMG1	0.55051	0.826634	0.740254	0.545571
YCR047C	BUD23	0.946036	0.914643	0.924332	0.936413
YCR048W	ARE1	0.615745	0.642261	0.642198	0.716548
YCR049C	YCR049C
YCR050C	YCR050C
YCR051W	YCR051W	0.918355	0.924483	0.932491	0.911389
YCR052W	RSC6	0.603333	0.545486	0.662486	0.308495
YCR053W	THR4	0.950163	0.939769	0.956447	0.905267
YCR054C	CTR86	0.561147	0.733758	0.699339	0.688324
YCR057C	PWP2	0.943365	0.953055	0.97135	0.961888
YCR059C	YIH1	0.85184	0.807602	0.855245	0.882458
YCR060W	TAH1	0.649469	0.757746	0.563536	0.59231
YCR061W	YCR061W	0.66139	0.582213	0.740753	0.859023
YCR063W	BUD31
YCR064C	YCR064C
YCR065W	HCM1	0.392556	0.647287	0.559356	0.568039
YCR066W	RAD18	0.548302	0.562549	0.352241	0.219409
YCR067C	SED4	0.532708	0.590968	0.352917	0.500144
YCR068W	ATG15
YCR069W	CPR4	0.767426	0.923171	0.914072	0.894192
YCR071C	IMG2	0.408005	0.634363	0.472164	0.407715
YCR072C	RSA4	0.916032	0.945841	0.941719	0.945879
YCR073C	SSK22	0.689822	0.415195	0.441379	0.452697
YCR075C	ERS1	0.945102	0.907573	0.949241	0.948568
YCR076C	FUB1	0.918336	0.774594	0.91992	0.895307
YCR077C	PAT1	0.521882	0.75997	0.350776	0.359057
YCR079W	PTC6	0.910528	0.904415	0.929122	0.891233
YCR081W	SRB8
YCR082W	AHC2	0.679344	0.536505	0.254686	0.488941
YCR083W	TRX3	0.834191	0.939755	0.811806	0.944375
YCR084C	TUP1	0.774564	0.536363	0.666407	0.554422
YCR085W	YCR085W
YCR086W	CSM1	0.579118	0.622771	0.73881	0.71192
YCR087W	YCR087W
YCR088W	ABP1	0.703454	0.876059	0.943489	0.61593
YCR089W	FIG2	0.499657	0.864554	0.660485	0.820984
YCR090C	YCR090C	0.414828	0.558738	0.61598	0.479099
YCR091W	KIN82	0.934724	0.781464	0.926757	0.845169
YCR092C	MSH3	0.488814	0.740221	0.357014	0.55295
YCR093W	CDC39	0.714662	0.625417	0.595697	0.566053
YCR094W	CDC50	0.260026	0.373678	0.194065	0.184559
YCR095C	OCA4	0.337677	0.448585	0.460079	0.426847
YCR096C	HMRA2
YCR098C	GIT1	0.83244	0.875807	0.852833	0.871779
YCR099C	YCR099C
YCR100C	EMA35
YCR101C	YCR101C
YCR102C	YCR102C
YCR104W	PAU3
YCR105W	ADH7
YCR106W	RDS1
YCR107W	AAD3	0.792439	0.586296	0.710443	0.827572
YDL001W	RMD1	0.658144	0.608231	0.385867	0.777498
YDL002C	NHP10	0.443456	0.338707	0.494063	0.531427
YDL003W	MCD1	0.672708	0.533784	0.582307	0.689133
YDL004W	ATP16	0.860894	0.775922	0.710249	0.747557
YDL005C	MED2	0.54394	0.638426	0.388695	0.305247
YDL006W	PTC1	0.871134	0.413363	0.786603	0.372885
YDL007W	RPT2	0.718911	0.592049	0.517682	0.468767
YDL008W	APC11
YDL009C	YDL009C
YDL010W	GRX6	0.888879	0.930649	0.872947	0.874678
YDL011C	YDL011C
YDL012C	YDL012C	0.917217	0.453976	0.899099	0.442063
YDL013W	SLX5	0.719139	0.8091	0.726516	0.836563
YDL014W	NOP1	0.978932	0.977749	0.983097	0.982355
YDL015C	TSC13	0.703168	0.724521	0.47076	0.599113
YDL016C	YDL016C
YDL017W	CDC7	0.180638	0.312238	0.250136	0.634827
YDL018C	ERP3	0.674074	0.584152	0.813622	0.371569
YDL019C	OSH2	0.900893	0.894151	0.856664	0.884403
YDL020C	RPN4	0.857296	0.825163	0.715672	0.652258
YDL021W	GPM2	0.969419	0.92717	0.967961	0.965451
YDL022W	GPD1	0.928074	0.740255	0.925184	0.9367
YDL023C	YDL023C
YDL024C	DIA3	0.956274	0.900817	0.913714	0.96601
YDL025C	RTK1	0.891985	0.871414	0.909241	0.91733
YDL026W	YDL026W
YDL027C	MRX9	0.945125	0.937535	0.95209	0.949671
YDL028C	MPS1	0.709026	0.709253	0.788526	0.627473
YDL029W	ARP2	0.783541	0.902145	0.686021	0.798579
YDL030W	PRP9	0.531735	0.696093	0.38756	0.747455
YDL031W	DBP10	0.937071	0.924831	0.961527	0.950948
YDL032W	YDL032W
YDL033C	SLM3
YDL034W	YDL034W
YDL035C	GPR1	0.848269	0.716966	0.798459	0.495086
YDL036C	PUS9	0.783544	0.703168	0.815691	0.545443
YDL037C	BSC1
YDL039C	PRM7
YDL040C	NAT1	0.766864	0.806078	0.784009	0.840202
YDL041W	YDL041W
YDL042C	SIR2	0.665319	0.374712	0.734885	0.590565
YDL043C	PRP11	0.18069	0.284728	0.616161	0.476052
YDL044C	MTF2	0.618053	0.399058	0.235464	0.229886
YDL045C	FAD1	0.86668	0.629065	0.877413	0.747115
YDL046W	NPC2	0.870904	0.968459	0.917284	0.94112
YDL047W	SIT4	0.456406	0.515155	0.329262	0.584315
YDL048C	STP4	0.910758	0.875058	0.834104	0.87438
YDL049C	KNH1	0.923308	0.943025	0.925321	0.932677
YDL050C	YDL050C
YDL051W	LHP1	0.974628	0.969937	0.979757	0.979471
YDL052C	SLC1	0.757348	0.582963	0.557382	0.606451
YDL053C	PBP4	0.671376	0.530621	0.435833	0.219392
YDL054C	MCH1	0.915742	0.917133	0.912049	0.910732
YDL055C	PSA1	0.844072	0.764653	0.879521	0.902145
YDL056W	MBP1	0.584358	0.606284	0.401602	0.333423
YDL057W	YDL057W	0.946711	0.882339	0.950379	0.899591
YDL058W	USO1	0.513121	0.765989	0.304309	0.542787
YDL059C	RAD59	0.956844	0.955755	0.960734	0.952364
YDL060W	TSR1	0.961989	0.969777	0.96747	0.973628
YDL061C	RPS29B	0.9748	0.946881	0.976347	0.971855
YDL062W	YDL062W
YDL063C	SYO1	0.941223	0.960731	0.956279	0.969381
YDL064W	UBC9	0.756874	0.805651	0.551174	0.538522
YDL065C	PEX19	0.604145	0.750259	0.527793	0.294536
YDL066W	IDP1	0.844842	0.890298	0.905587	0.883045
YDL067C	COX9	0.847896	0.914154	0.877614	0.820912
YDL068W	YDL068W
YDL069C	CBS1	0.681914	0.792502	0.791204	0.756558
YDL070W	BDF2	0.682721	0.935948	0.697621	0.73309
YDL071C	YDL071C
YDL072C	YET3	0.794836	0.683921	0.959848	0.849866
YDL073W	AHK1	0.610292	0.587484	0.350699	0.363751
YDL074C	BRE1	0.555286	0.76341	0.518903	0.501413
YDL075W	RPL31A	0.978268	0.961926	0.975748	0.97432
YDL076C	RXT3	0.814134	0.824041	0.857146	0.882526
YDL077C	VAM6	0.495384	0.572715	0.593153	0.478935
YDL078C	MDH3	0.953935	0.964883	0.895861	0.960721
YDL079C	MRK1	0.93662	0.832655	0.909395	0.926465
YDL080C	THI3	0.718061	0.638735	0.79779	0.509413
YDL081C	RPP1A	0.973282	0.961241	0.975862	0.97137
YDL082W	RPL13A	0.975796	0.966402	0.975907	0.975647
YDL083C	RPS16B	0.977854	0.953813	0.973697	0.974132
YDL084W	SUB2	0.948184	0.89224	0.906485	0.945431
YDL085W	NDE2	0.976732	0.916306	0.971371	0.965535
YDL086W	YDL086W	0.943517	0.799529	0.808418	0.90248
YDL087C	LUC7
YDL088C	ASM4	0.580959	0.5933	0.320303	0.41759
YDL089W	NUR1	0.677109	0.73425	0.739792	0.836045
YDL090C	RAM1	0.7911	0.684953	0.79997	0.74315
YDL091C	UBX3	0.937092	0.902726	0.923172	0.908383
YDL092W	SRP14	0.621168	0.802152	0.707993	0.65504
YDL093W	PMT5	0.44114	0.575419	0.307453	0.703362
YDL094C	YDL094C
YDL095W	PMT1	0.937346	0.762794	0.847768	0.852611
YDL096C	OPI6
YDL097C	RPN6	0.704085	0.534352	0.396211	0.627217
YDL098C	SNU23	0.329294	0.415387	0.218862	0.308156
YDL099W	BUG1	0.361469	0.495725	0.269122	0.147312
YDL100C	GET3	0.794693	0.903887	0.897551	0.687595
YDL101C	DUN1	0.415647	0.429223	0.731277	0.473832
YDL102W	POL3	0.666068	0.344898	0.534291	0.675406
YDL103C	QRI1	0.428098	0.753772	0.43569	0.623287
YDL104C	QRI7	0.827028	0.918629	0.846514	0.905807
YDL105W	NSE4	0.459401	0.840238	0.364531	0.582727
YDL106C	PHO2	0.512103	0.829515	0.761905	0.798996
YDL107W	MSS2	0.806744	0.779379	0.82649	0.778115
YDL108W	KIN28	0.58719	0.380449	0.549608	0.499582
YDL109C	YDL109C
YDL110C	TMA17	0.961318	0.980178	0.96129	0.96933
YDL111C	RRP42	0.81115	0.727235	0.828095	0.880402
YDL112W	TRM3	0.934808	0.878836	0.93882	0.930029
YDL113C	ATG20	0.946504	0.927356	0.947139	0.95528
YDL114W	YDL114W	0.918722	0.850432	0.83157	0.813176
YDL115C	IWR1	0.902221	0.822165	0.906884	0.783033
YDL116W	NUP84	0.583641	0.284949	0.231857	0.319454
YDL117W	CYK3	0.543245	0.721924	0.561808	0.486715
YDL118W	YDL118W
YDL119C	HEM25	0.550061	0.590995	0.54247	0.864227
YDL120W	YFH1
YDL121C	EXP1	0.964043	0.842735	0.928062	0.867377
YDL122W	UBP1	0.917302	0.741916	0.872707	0.8284
YDL123W	SNA4	0.885695	0.704576	0.906238	0.783851
YDL124W	YDL124W	0.972618	0.817371	0.963658	0.964192
YDL125C	HNT1	0.67126	0.87062	0.633897	0.847342
YDL126C	CDC48	0.610714	0.862471	0.419734	0.604147
YDL127W	PCL2	0.67592	0.590513	0.461112	0.640645
YDL128W	VCX1	0.728067	0.804095	0.801638	0.578284
YDL129W	YDL129W	0.766718	0.458353	0.770883	0.778581
YDL130W	RPP1B	0.979249	0.961037	0.977714	0.975984
YDL131W	LYS21	0.882156	0.970464	0.853301	0.918659
YDL132W	CDC53	0.89471	0.779444	0.913717	0.782457
YDL133W	SRF1	0.797784	0.703551	0.70098	0.831159
YDL134C	PPH21	0.929168	0.720591	0.769479	0.460776
YDL135C	RDI1	0.209042	0.781253	0.310687	0.439144
YDL136W	RPL35B
YDL137W	ARF2	0.931018	0.969307	0.948403	0.890838
YDL138W	RGT2	0.849823	0.887409	0.870302	0.787115
YDL139C	SCM3	0.834121	0.833067	0.813141	0.807733
YDL140C	RPO21	0.941626	0.667367	0.949772	0.842075
YDL141W	BPL1	0.519708	0.545063	0.370675	0.313007
YDL142C	CRD1	0.915836	0.682146	0.929154	0.741519
YDL143W	CCT4	0.967421	0.957237	0.96282	0.923814
YDL144C	YDL144C	0.862719	0.811026	0.86785	0.796013
YDL145C	COP1	0.941762	0.728802	0.724646	0.517434
YDL146W	LDB17	0.774203	0.420838	0.802334	0.835598
YDL147W	RPN5	0.693638	0.530112	0.535819	0.562944
YDL148C	NOP14	0.94056	0.9459	0.965639	0.963941
YDL149W	ATG9	0.961225	0.9293	0.96177	0.95409
YDL150W	RPC53	0.919203	0.909924	0.960728	0.923598
YDL151C	BUD30
YDL152W	YDL152W
YDL153C	SAS10	0.959083	0.941923	0.961266	0.95962
YDL154W	MSH5	0.734061	0.626567	0.675725	0.737135
YDL155W	CLB3	0.421199	0.756604	0.144082	0.622976
YDL156W	CMR1
YDL157C	YDL157C	0.908401	0.849442	0.948311	0.550371
YDL158C	YDL158C
YDL159W	STE7	0.777665	0.858077	0.735646	0.817793
YDL160C	DHH1
YDL161W	ENT1	0.338151	0.716411	0.375011	0.381714
YDL162C	YDL162C
YDL163W	YDL163W
YDL164C	CDC9	0.780672	0.320424	0.566571	0.469246
YDL165W	CDC36	0.427547	0.790435	0.453743	0.829439
YDL166C	FAP7	0.828278	0.908445	0.895808	0.880565
YDL167C	NRP1	0.951961	0.930641	0.944256	0.949642
YDL168W	SFA1	0.922977	0.886353	0.767456	0.3044
YDL169C	UGX2	0.976399	0.972485	0.977465	0.977606
YDL170W	UGA3	0.94421	0.963253	0.937483	0.953178
YDL171C	GLT1	0.912707	0.960958	0.812128	0.866569
YDL172C	YDL172C
YDL173W	PAR32	0.403029	0.906111	0.302928	0.74835
YDL174C	DLD1	0.959558	0.927608	0.930734	0.955311
YDL175C	AIR2	0.471834	0.829249	0.62654	0.816307
YDL176W	YDL176W	0.907836	0.902612	0.888364	0.90364
YDL177C	YDL177C	0.68928	0.677313	0.431313	0.536094
YDL178W	DLD2	0.485423	0.6171	0.35811	0.381963
YDL179W	PCL9	0.769658	0.87802	0.808536	0.798726
YDL180W	YDL180W	0.896764	0.684745	0.906963	0.691326
YDL181W	INH1	0.938992	0.816132	0.895977	0.90338
YDL182W	LYS20	0.741655	0.962592	0.871271	0.953993
YDL183C	YDL183C	0.922909	0.926446	0.912493	0.93601
YDL184C	RPL41A
YDL185W	VMA1
YDL186W	YDL186W
YDL187C	YDL187C
YDL188C	PPH22	0.383715	0.42785	0.641504	0.240144
YDL189W	RBS1	0.663381	0.457694	0.675446	0.331209
YDL190C	UFD2	0.315842	0.394531	0.330887	0.496731
YDL191W	RPL35A	0.974151	0.958383	0.971458	0.97246
YDL192W	ARF1	0.970372	0.969415	0.972047	0.955262
YDL193W	NUS1	0.345677	0.573628	0.275931	0.375349
YDL194W	SNF3	0.810833	0.700546	0.819204	0.618183
YDL195W	SEC31	0.737123	0.63875	0.849846	0.734479
YDL196W	YDL196W
YDL197C	ASF2	0.803414	0.765833	0.770821	0.564101
YDL198C	GGC1	0.939336	0.931781	0.914074	0.930913
YDL199C	YDL199C	0.957412	0.940385	0.957452	0.961492
YDL200C	MGT1	0.90675	0.929356	0.924906	0.934895
YDL201W	TRM8	0.960305	0.942397	0.953385	0.948033
YDL202W	MRPL11	0.460412	0.618731	0.550435	0.307764
YDL203C	ACK1	0.806558	0.846652	0.690248	0.767686
YDL204W	RTN2	0.961719	0.894995	0.960663	0.970952
YDL205C	HEM3	0.647986	0.83789	0.722526	0.798367
YDL206W	YDL206W	0.243441	0.54659	0.588926	0.37768
YDL207W	GLE1	0.60344	0.57415	0.563273	0.328067
YDL208W	NHP2	0.977518	0.974957	0.980169	0.979465
YDL209C	CWC2	0.348849	0.561225	0.593262	0.358373
YDL210W	UGA4	0.962167	0.966305	0.957131	0.958737
YDL211C	YDL211C	0.347769	0.491089	0.509305	0.471063
YDL212W	SHR3	0.85232	0.795271	0.779103	0.556386
YDL213C	NOP6	0.97543	0.966316	0.953287	0.963153
YDL214C	PRR2	0.921046	0.933354	0.918742	0.962707
YDL215C	GDH2	0.957883	0.965632	0.959678	0.966842
YDL216C	RRI1	0.944878	0.911118	0.946076	0.914291
YDL217C	TIM22	0.332878	0.561643	0.218767	0.430422
YDL218W	YDL218W	0.823144	0.536644	0.846117	0.703312
YDL219W	DTD1	0.70778	0.612161	0.706804	0.271311
YDL220C	CDC13	0.460376	0.81973	0.370999	0.817244
YDL221W	YDL221W
YDL222C	FMP45	0.96248	0.890435	0.953516	0.965857
YDL223C	HBT1	0.954871	0.856443	0.935643	0.925345
YDL224C	WHI4	0.666771	0.902765	0.836192	0.893786
YDL225W	SHS1	0.483353	0.367636	0.237532	0.289658
YDL226C	GCS1	0.66389	0.790219	0.541142	0.514051
YDL227C	HO	0.773603	0.884214	0.950516	0.806254
YDL228C	YDL228C
YDL229W	SSB1	0.980757	0.977299	0.982009	0.982193
YDL230W	PTP1	0.785809	0.592037	0.852633	0.902503
YDL231C	BRE4	0.912418	0.818188	0.892567	0.517137
YDL232W	OST4
YDL233W	MFG1	0.749673	0.852742	0.813647	0.862063
YDL234C	GYP7	0.933286	0.914795	0.941052	0.94349
YDL235C	YPD1	0.696878	0.854061	0.434443	0.538757
YDL236W	PHO13	0.664787	0.826227	0.516927	0.461355
YDL237W	AIM6	0.865371	0.962604	0.942533	0.905261
YDL238C	GUD1	0.96895	0.974593	0.97361	0.973559
YDL239C	ADY3	0.957357	0.936859	0.950736	0.946744
YDL240W	LRG1	0.762355	0.874087	0.804085	0.801834
YDL241W	YDL241W	0.955285	0.921417	0.960219	0.748636
YDL242W	YDL242W
YDL243C	AAD4
YDL244W	THI13
YDL245C	HXT15
YDL246C	SOR2
YDL247W	MPH2
YDL248W	COS7
YDR001C	NTH1	0.981054	0.949373	0.963426	0.957235
YDR002W	YRB1	0.939973	0.946072	0.817403	0.831934
YDR003W	RCR2	0.931335	0.895832	0.938978	0.901672
YDR004W	RAD57	0.830225	0.866049	0.857083	0.747811
YDR005C	MAF1	0.902829	0.92526	0.906902	0.923992
YDR006C	SOK1	0.574851	0.507583	0.453655	0.268119
YDR007W	TRP1	0.921658	0.858537	0.778813	0.846839
YDR008C	YDR008C
YDR009W	GAL3
YDR010C	YDR010C
YDR011W	SNQ2	0.978768	0.953076	0.975857	0.970768
YDR012W	RPL4B
YDR013W	PSF1	0.571688	0.880509	0.669796	0.790652
YDR014W	RAD61	0.758031	0.678362	0.837491	0.45393
YDR015C	YDR015C
YDR016C	DAD1	0.832478	0.84682	0.883151	0.712377
YDR017C	KCS1	0.758036	0.75554	0.63848	0.523124
YDR018C	YDR018C	0.956319	0.822532	0.940094	0.863165
YDR019C	GCV1	0.957505	0.966602	0.955952	0.963924
YDR020C	DAS2	0.704139	0.872224	0.594775	0.871846
YDR021W	FAL1	0.814661	0.749761	0.939596	0.862041
YDR022C	ATG31	0.953056	0.919993	0.94982	0.907355
YDR023W	SES1	0.921284	0.956569	0.974081	0.914577
YDR024W	FYV1
YDR025W	RPS11A
YDR026C	NSI1	0.737287	0.609828	0.729101	0.825761
YDR027C	VPS54	0.843045	0.794906	0.835049	0.767929
YDR028C	REG1	0.789091	0.653989	0.571352	0.679043
YDR029W	YDR029W
YDR030C	RAD28	0.910904	0.743657	0.914539	0.744453
YDR031W	MIX14	0.928782	0.909462	0.94326	0.947578
YDR032C	PST2	0.972351	0.960327	0.943609	0.950752
YDR033W	MRH1	0.910024	0.763696	0.707997	0.69732
YDR034C	LYS14	0.921628	0.843927	0.939749	0.881715
YDR035W	ARO3	0.881122	0.868528	0.689687	0.633206
YDR036C	EHD3	0.462487	0.656792	0.418961	0.409436
YDR037W	KRS1	0.973543	0.941949	0.974358	0.972553
YDR038C	ENA5
YDR039C	ENA2
YDR040C	ENA1
YDR041W	RSM10	0.865315	0.754842	0.851446	0.727223
YDR042C	YDR042C
YDR043C	NRG1	0.957434	0.921167	0.941089	0.94385
YDR044W	HEM13	0.695441	0.820229	0.547991	0.754218
YDR045C	RPC11	0.897179	0.904176	0.911434	0.898731
YDR046C	BAP3	0.919055	0.966729	0.895264	0.972753
YDR047W	HEM12
YDR048C	YDR048C
YDR049W	VMS1	0.446549	0.2716	0.66571	0.22883
YDR050C	TPI1	0.861967	0.950607	0.815704	0.823648
YDR051C	DET1	0.488437	0.284543	0.569306	0.676918
YDR052C	DBF4	0.690704	0.582642	0.556484	0.423683
YDR053W	YDR053W
YDR054C	CDC34	0.495642	0.392433	0.400867	0.567415
YDR055W	PST1	0.532923	0.686211	0.460191	0.674845
YDR056C	EMC10	0.541068	0.549575	0.675109	0.589955
YDR057W	YOS9	0.629749	0.574628	0.553912	0.792867
YDR058C	TGL2	0.923379	0.72907	0.900364	0.928099
YDR059C	UBC5	0.956445	0.957964	0.953573	0.962285
YDR060W	MAK21	0.955827	0.964275	0.961667	0.96632
YDR061W	YDR061W	0.776334	0.785424	0.882238	0.311118
YDR062W	LCB2	0.906205	0.551587	0.779005	0.832925
YDR063W	AIM7	0.718874	0.586339	0.87938	0.80862
YDR064W	RPS13	0.977875	0.949796	0.976956	0.975394
YDR065W	RRG1
YDR066C	RTR2	0.863248	0.910072	0.882689	0.903258
YDR067C	OCA6	0.833617	0.897889	0.866127	0.834767
YDR068W	DOS2	0.38664	0.539745	0.691765	0.641571
YDR069C	DOA4	0.882842	0.880633	0.904244	0.915697
YDR070C	FMP16	0.976681	0.941171	0.972474	0.972723
YDR071C	PAA1	0.889886	0.693	0.518112	0.390939
YDR072C	IPT1	0.708078	0.526561	0.730429	0.490429
YDR073W	SNF11	0.842886	0.839915	0.821977	0.795927
YDR074W	TPS2	0.932747	0.899475	0.964842	0.957851
YDR075W	PPH3	0.680968	0.793041	0.375838	0.545401
YDR076W	RAD55
YDR077W	SED1	0.825567	0.956071	0.776584	0.793191
YDR078C	SHU2	0.767795	0.71839	0.604506	0.633781
YDR079W	PET100	0.847224	0.711326	0.818241	0.701323
YDR080W	VPS41	0.825504	0.842714	0.73771	0.737079
YDR081C	PDC2	0.529621	0.330381	0.511633	0.370663
YDR082W	STN1	0.890832	0.80457	0.835716	0.84725
YDR083W	RRP8	0.932307	0.91989	0.950017	0.958714
YDR084C	TVP23	0.358788	0.798092	0.692801	0.888385
YDR085C	AFR1	0.911645	0.699792	0.877705	0.87133
YDR086C	SSS1	0.95189	0.960637	0.75788	0.836592
YDR087C	RRP1	0.971334	0.955954	0.95208	0.974313
YDR088C	SLU7	0.462254	0.195322	0.466513	0.198806
YDR089W	VTC5	0.911656	0.958955	0.90029	0.938774
YDR090C	ILT1	0.913216	0.957296	0.89326	0.892689
YDR091C	RLI1	0.924448	0.923445	0.941628	0.954073
YDR092W	UBC13
YDR093W	DNF2	0.888926	0.570924	0.626094	0.774081
YDR094W	YDR094W
YDR095C	YDR095C
YDR096W	GIS1	0.924753	0.782093	0.917809	0.897371
YDR097C	MSH6	0.811424	0.581121	0.631882	0.399577
YDR098C	GRX3	0.556682	0.609619	0.461609	0.405551
YDR099W	BMH2	0.754772	0.921049	0.773299	0.932793
YDR100W	TVP15	0.896431	0.817178	0.941255	0.884247
YDR101C	ARX1	0.955752	0.971934	0.966606	0.97604
YDR102C	YDR102C
YDR103W	STE5	0.874683	0.905672	0.726663	0.938833
YDR104C	SPO71	0.915898	0.911514	0.900452	0.896857
YDR105C	TMS1	0.630966	0.914864	0.793639	0.901379
YDR106W	ARP10	0.467767	0.913262	0.622807	0.920748
YDR107C	TMN2	0.749641	0.76159	0.914012	0.828252
YDR108W	TRS85	0.770889	0.576334	0.715608	0.669087
YDR109C	YDR109C	0.722009	0.417085	0.645495	0.180437
YDR110W	FOB1	0.505338	0.787121	0.659115	0.900489
YDR111C	ALT2
YDR112W	IRC2
YDR113C	PDS1	0.741285	0.870196	0.79679	0.858909
YDR114C	YDR114C
YDR115W	MRX14	0.444869	0.916411	0.288483	0.47171
YDR116C	MRPL1	0.389652	0.612282	0.401597	0.377927
YDR117C	TMA64	0.430252	0.408374	0.381299	0.414586
YDR118W	APC4	0.833226	0.702152	0.880596	0.705278
YDR119W	VBA4	0.799802	0.883377	0.817669	0.895678
YDR120C	TRM1	0.929893	0.862276	0.934082	0.933183
YDR121W	DPB4	0.846681	0.30248	0.828066	0.230521
YDR122W	KIN1	0.921539	0.956322	0.944241	0.960396
YDR123C	INO2
YDR124W	YDR124W
YDR125C	ECM18
YDR126W	SWF1	0.650963	0.579492	0.282444	0.693206
YDR127W	ARO1	0.737057	0.602249	0.673406	0.57492
YDR128W	MTC5	0.600672	0.854983	0.547218	0.727499
YDR129C	SAC6	0.943224	0.867931	0.95256	0.964305
YDR130C	FIN1	0.850659	0.831477	0.856709	0.804943
YDR131C	YDR131C	0.890654	0.905021	0.911169	0.925792
YDR132C	MRX16	0.756194	0.726619	0.585279	0.810091
YDR133C	YDR133C
YDR134C	CCW22
YDR135C	YCF1	0.851283	0.841856	0.769258	0.355812
YDR136C	VPS61
YDR137W	RGP1	0.725757	0.792731	0.724029	0.721093
YDR138W	HPR1
YDR139C	RUB1
YDR140W	MTQ2	0.519946	0.329515	0.286932	0.351284
YDR141C	DOP1	0.616423	0.718441	0.678672	0.532921
YDR142C	PEX7	0.852701	0.862278	0.769579	0.796678
YDR143C	SAN1	0.806656	0.778995	0.739403	0.813179
YDR144C	MKC7	0.97115	0.812286	0.960386	0.930162
YDR145W	TAF12
YDR146C	SWI5	0.449415	0.831935	0.745419	0.708588
YDR147W	EKI1	0.678409	0.892674	0.795716	0.875461
YDR148C	KGD2	0.877856	0.860519	0.948707	0.948157
YDR149C	YDR149C
YDR150W	NUM1	0.907758	0.809698	0.839521	0.689633
YDR151C	CTH1	0.421213	0.468431	0.507581	0.350916
YDR152W	GIR2	0.944695	0.873912	0.920085	0.714615
YDR153C	ENT5	0.695552	0.736373	0.458964	0.427641
YDR154C	YDR154C
YDR155C	CPR1	0.920161	0.969446	0.929582	0.925302
YDR156W	RPA14	0.894351	0.965261	0.972741	0.944686
YDR157W	YDR157W
YDR158W	HOM2	0.813045	0.876757	0.704956	0.721512
YDR159W	SAC3	0.4993	0.506177	0.395571	0.237068
YDR160W	SSY1	0.800121	0.896684	0.806637	0.849914
YDR161W	ACL4	0.969899	0.927723	0.960828	0.962373
YDR162C	NBP2	0.777781	0.297045	0.591265	0.303303
YDR163W	CWC15	0.279713	0.611679	0.673317	0.558251
YDR164C	SEC1	0.447958	0.774321	0.172878	0.761218
YDR165W	TRM82	0.958722	0.934437	0.967999	0.951945
YDR166C	SEC5	0.608955	0.655359	0.614246	0.532749
YDR167W	TAF10	0.34728	0.413087	0.275188	0.309618
YDR168W	CDC37	0.332567	0.772856	0.367943	0.818914
YDR169C	STB3	0.816708	0.784022	0.875918	0.860973
YDR170C	SEC7	0.605826	0.903481	0.470268	0.393682
YDR171W	HSP42	0.957424	0.883328	0.955939	0.966232
YDR172W	SUP35	0.970107	0.942378	0.97064	0.964157
YDR173C	ARG82	0.579987	0.500264	0.677612	0.49063
YDR174W	HMO1	0.846984	0.890925	0.73176	0.738383
YDR175C	RSM24	0.32413	0.522374	0.335159	0.232387
YDR176W	NGG1	0.49047	0.768964	0.588033	0.71442
YDR177W	UBC1	0.144496	0.799677	0.323033	0.291409
YDR178W	SDH4	0.950386	0.93735	0.930914	0.927485
YDR179C	CSN9	0.544305	0.87933	0.814418	0.85641
YDR180W	SCC2	0.672849	0.510647	0.538565	0.310987
YDR181C	SAS4	0.739441	0.780144	0.756947	0.773075
YDR182W	CDC1	0.422146	0.85102	0.692589	0.802204
YDR183W	PLP1	0.588259	0.403831	0.326801	0.621114
YDR184C	ATC1	0.930059	0.919881	0.962305	0.958284
YDR185C	UPS3
YDR186C	SND1	0.811127	0.851501	0.68105	0.770881
YDR187C	YDR187C
YDR188W	CCT6	0.91339	0.958984	0.783703	0.876046
YDR189W	SLY1	0.611437	0.697091	0.445478	0.566534
YDR190C	RVB1	0.923763	0.756192	0.862176	0.826396
YDR191W	HST4	0.75145	0.710669	0.813488	0.881251
YDR192C	NUP42	0.39857	0.723253	0.469027	0.656531
YDR193W	YDR193W
YDR194C	MSS116	0.827153	0.840323	0.88692	0.836407
YDR195W	REF2	0.673005	0.65534	0.38308	0.625295
YDR196C	CAB5	0.85786	0.830644	0.893888	0.905727
YDR197W	CBS2	0.80132	0.555804	0.596577	0.76006
YDR198C	RKM2	0.396322	0.711674	0.286379	0.704954
YDR199W	YDR199W
YDR200C	VPS64	0.614338	0.768005	0.673218	0.786691
YDR201W	SPC19	0.372609	0.684293	0.641072	0.649191
YDR202C	RAV2	0.904976	0.908546	0.90557	0.933409
YDR203W	YDR203W
YDR204W	COQ4	0.949785	0.948033	0.951331	0.944844
YDR205W	MSC2	0.344142	0.55975	0.428355	0.463392
YDR206W	EBS1	0.577989	0.799208	0.285237	0.461845
YDR207C	UME6	0.68207	0.7264	0.532	0.478817
YDR208W	MSS4	0.844348	0.824493	0.688096	0.620803
YDR209C	YDR209C
YDR210W	YDR210W
YDR211W	GCD6	0.850039	0.618473	0.879766	0.776226
YDR212W	TCP1	0.901597	0.940255	0.886392	0.900689
YDR213W	UPC2	0.581015	0.464723	0.287871	0.443686
YDR214W	AHA1	0.853974	0.94574	0.802473	0.866865
YDR215C	YDR215C
YDR216W	ADR1	0.817403	0.889196	0.883861	0.894744
YDR217C	RAD9	0.594743	0.698023	0.509874	0.0866134
YDR218C	SPR28
YDR219C	MFB1	0.868948	0.917392	0.88674	0.898821
YDR220C	YDR220C
YDR221W	GTB1	0.866047	0.850595	0.874882	0.925415
YDR222W	YDR222W	0.765153	0.844937	0.786905	0.867349
YDR223W	CRF1	0.893211	0.895761	0.91511	0.96266
YDR224C	HTB1	0.932178	0.863864	0.58887	0.887533
YDR225W	HTA1	0.814368	0.831633	0.780752	0.733976
YDR226W	ADK1	0.970615	0.956807	0.941754	0.967533
YDR227W	SIR4	0.618966	0.782556	0.664336	0.553722
YDR228C	PCF11	0.658801	0.597441	0.395354	0.479189
YDR229W	IVY1	0.794813	0.853695	0.840283	0.879892
YDR230W	YDR230W
YDR231C	COX20	0.929936	0.885408	0.954598	0.935809
YDR232W	HEM1	0.554047	0.813892	0.706182	0.753224
YDR233C	RTN1	0.870224	0.862428	0.968226	0.844389
YDR234W	LYS4	0.776888	0.928383	0.768481	0.769768
YDR235W	PRP42	0.754357	0.818165	0.764182	0.743471
YDR236C	FMN1	0.841827	0.770046	0.875137	0.644738
YDR237W	MRPL7	0.453817	0.695852	0.481625	0.724105
YDR239C	YDR239C
YDR240C	SNU56	0.245985	0.561257	0.23234	0.203822
YDR241W	BUD26
YDR246W	TRS23	0.449543	0.376736	0.296717	0.380114
YDR247W	VHS1	0.839214	0.914373	0.87409	0.9062
YDR248C	YDR248C	0.944695	0.957775	0.934407	0.946486
YDR249C	YDR249C	0.667104	0.557265	0.622472	0.315776
YDR250C	YDR250C
YDR251W	PAM1	0.86067	0.836366	0.874791	0.881294
YDR252W	BTT1	0.936754	0.926251	0.930379	0.939449
YDR253C	MET32	0.962474	0.952466	0.961664	0.964719
YDR254W	CHL4	0.952487	0.910271	0.947379	0.945934
YDR255C	RMD5	0.947667	0.916713	0.936063	0.953251
YDR256C	CTA1	0.849238	0.809188	0.899411	0.901439
YDR257C	RKM4	0.620729	0.532273	0.372507	0.527167
YDR258C	HSP78	0.922748	0.814591	0.918774	0.890036
YDR259C	YAP6	0.88833	0.886131	0.883001	0.921564
YDR260C	SWM1
YDR261C	EXG2	0.644599	0.934911	0.401791	0.867076
YDR262W	YDR262W	0.917279	0.915557	0.929255	0.887595
YDR263C	DIN7	0.426651	0.848467	0.762991	0.896739
YDR264C	AKR1	0.47146	0.459223	0.722452	0.328278
YDR265W	PEX10	0.903582	0.672756	0.914316	0.816814
YDR266C	HEL2	0.719551	0.631973	0.803699	0.620778
YDR267C	CIA1	0.654188	0.513025	0.385031	0.431586
YDR268W	MSW1	0.655199	0.359948	0.70772	0.702812
YDR269C	YDR269C
YDR270W	CCC2	0.546885	0.897298	0.837431	0.746582
YDR271C	YDR271C
YDR272W	GLO2	0.874113	0.881879	0.857672	0.934111
YDR273W	DON1	0.883129	0.828726	0.803778	0.786463
YDR274C	YDR274C
YDR275W	BSC2	0.901089	0.751654	0.918869	0.864493
YDR276C	PMP3	0.906331	0.928813	0.927821	0.862666
YDR277C	MTH1	0.918298	0.76375	0.807303	0.727882
YDR278C	YDR278C
YDR279W	RNH202
YDR280W	RRP45	0.653305	0.822501	0.585432	0.815714
YDR281C	PHM6	0.642384	0.823954	0.838642	0.840657
YDR282C	MRX10	0.849674	0.787926	0.878957	0.825934
YDR283C	GCN2	0.829272	0.844737	0.907056	0.812321
YDR284C	DPP1	0.893264	0.936032	0.946434	0.904313
YDR285W	ZIP1	0.600401	0.896395	0.798993	0.931387
YDR286C	MGP12	0.797783	0.464954	0.76765	0.705481
YDR287W	INM2	0.923882	0.811747	0.932123	0.919464
YDR288W	NSE3	0.868919	0.823416	0.747682	0.791329
YDR289C	RTT103
YDR290W	YDR290W
YDR291W	HRQ1	0.663022	0.736762	0.492634	0.822587
YDR292C	SRP101	0.69865	0.693521	0.553557	0.599328
YDR293C	SSD1	0.702941	0.778273	0.759546	0.859245
YDR294C	DPL1	0.661004	0.28946	0.800073	0.49372
YDR295C	HDA2	0.436228	0.62236	0.301595	0.335626
YDR296W	MHR1	0.514563	0.832004	0.424337	0.33142
YDR297W	SUR2	0.678425	0.605872	0.662189	0.657486
YDR298C	ATP5	0.82467	0.854936	0.821124	0.606989
YDR299W	BFR2	0.932401	0.925117	0.94726	0.946906
YDR300C	PRO1	0.932246	0.851413	0.927859	0.892808
YDR301W	CFT1	0.712303	0.616916	0.384345	0.369059
YDR302W	GPI11	0.510885	0.545281	0.320191	0.694912
YDR303C	RSC3	0.471031	0.670617	0.52279	0.424085
YDR304C	CPR5	0.706696	0.808754	0.598331	0.471706
YDR305C	HNT2	0.723148	0.621147	0.733259	0.802579
YDR306C	PFU1	0.891614	0.898052	0.911306	0.898139
YDR307W	PMT7	0.500294	0.524277	0.829902	0.416001
YDR308C	SRB7	0.549291	0.626023	0.579634	0.339991
YDR309C	GIC2	0.605824	0.634869	0.3679	0.304059
YDR310C	SUM1	0.531927	0.726539	0.54398	0.470126
YDR311W	TFB1	0.762523	0.397413	0.656145	0.357892
YDR312W	SSF2	0.888013	0.934144	0.896404	0.908662
YDR313C	PIB1	0.907688	0.878042	0.914299	0.881691
YDR314C	RAD34	0.816826	0.905809	0.862059	0.904696
YDR315C	IPK1	0.923173	0.524222	0.917815	0.81133
YDR316W	OMS1	0.595603	0.536596	0.255689	0.353917
YDR317W	HIM1
YDR318W	MCM21	0.886449	0.655139	0.812846	0.309213
YDR319C	YFT2	0.918691	0.735601	0.939465	0.737776
YDR320C	SWA2	0.550453	0.286366	0.43339	0.263709
YDR321W	ASP1	0.973849	0.969902	0.963561	0.962109
YDR322W	MRPL35	0.510472	0.830755	0.325499	0.41879
YDR323C	PEP7	0.8317	0.55105	0.855961	0.405948
YDR324C	UTP4	0.96386	0.960125	0.972187	0.975285
YDR325W	YCG1	0.567405	0.436627	0.626935	0.371537
YDR326C	YSP2	0.520254	0.520869	0.340758	0.434641
YDR327W	YDR327W
YDR328C	SKP1	0.710109	0.645554	0.720575	0.791322
YDR329C	PEX3	0.873836	0.86402	0.888038	0.909959
YDR330W	UBX5	0.907236	0.7932	0.922175	0.933494
YDR331W	GPI8	0.671336	0.716781	0.526656	0.315994
YDR332W	IRC3	0.764251	0.59865	0.558071	0.694376
YDR333C	RQC1	0.541998	0.371598	0.279645	0.475982
YDR334W	SWR1	0.478707	0.565523	0.403947	0.589782
YDR335W	MSN5	0.718557	0.808537	0.889861	0.790039
YDR336W	MRX8	0.830143	0.767101	0.808382	0.820532
YDR337W	MRPS28	0.296786	0.611581	0.266294	0.546955
YDR338C	YDR338C	0.773814	0.7594	0.675531	0.842796
YDR339C	FCF1	0.834468	0.937553	0.924729	0.929491
YDR340W	YDR340W
YDR341C	YDR341C	0.960866	0.950951	0.916721	0.968479
YDR342C	HXT7
YDR343C	HXT6
YDR344C	YDR344C
YDR345C	HXT3	0.916934	0.898904	0.861545	0.923396
YDR346C	SVF1	0.830656	0.739284	0.834954	0.867558
YDR347W	MRP1	0.369761	0.746833	0.515402	0.32618
YDR348C	PAL1	0.730711	0.825869	0.511715	0.596591
YDR349C	YPS7	0.483102	0.504716	0.36542	0.13753
YDR350C	ATP22	0.889145	0.824412	0.894288	0.897186
YDR351W	SBE2	0.628707	0.449667	0.456618	0.384559
YDR352W	YPQ2	0.815207	0.908035	0.770948	0.552811
YDR353W	TRR1	0.961174	0.8932	0.917005	0.709395
YDR354W	TRP4	0.830995	0.88077	0.841203	0.8716
YDR355C	YDR355C
YDR356W	SPC110	0.691955	0.871433	0.781335	0.573915
YDR357C	CNL1	0.812276	0.707305	0.886263	0.818997
YDR358W	GGA1	0.949821	0.897754	0.954593	0.958145
YDR359C	EAF1	0.527157	0.740486	0.400486	0.594319
YDR360W	OPI7
YDR361C	BCP1	0.919584	0.942283	0.941061	0.954033
YDR362C	TFC6	0.783968	0.613355	0.602433	0.610291
YDR363W	ESC2
YDR364C	CDC40	0.270048	0.377319	0.334848	0.212927
YDR365C	ESF1	0.974756	0.941735	0.966593	0.964704
YDR366C	YDR366C
YDR367W	KEI1	0.514227	0.747803	0.29208	0.711209
YDR368W	YPR1	0.934716	0.476382	0.930755	0.390694
YDR369C	XRS2	0.856315	0.824729	0.796772	0.814059
YDR370C	DXO1
YDR371W	CTS2	0.602186	0.497574	0.575893	0.395458
YDR372C	VPS74	0.296837	0.402263	0.267179	0.473646
YDR373W	FRQ1	0.472723	0.650139	0.532535	0.557825
YDR374C	PHO92
YDR375C	BCS1	0.473017	0.514952	0.374846	0.388152
YDR376W	ARH1	0.715561	0.671378	0.678299	0.583095
YDR377W	ATP17	0.929613	0.883925	0.842804	0.785133
YDR378C	LSM6	0.478761	0.712939	0.410247	0.382625
YDR379W	RGA2	0.853803	0.742641	0.848156	0.724361
YDR380W	ARO10	0.721472	0.75315	0.675881	0.580681
YDR381W	YRA1
YDR382W	RPP2B	0.970696	0.966645	0.974169	0.975527
YDR383C	NKP1	0.657832	0.664647	0.737897	0.71062
YDR384C	ATO3	0.894935	0.896293	0.919799	0.932279
YDR385W	EFT2	0.979856	0.959557	0.978502	0.977405
YDR386W	MUS81	0.815546	0.851674	0.880005	0.75902
YDR387C	CIN10	0.893209	0.8332	0.925868	0.815921
YDR388W	RVS167	0.919509	0.834425	0.92669	0.89218
YDR389W	SAC7	0.420211	0.635869	0.368404	0.330314
YDR390C	UBA2	0.379067	0.531709	0.200383	0.343599
YDR391C	YDR391C	0.949564	0.960835	0.952788	0.956801
YDR392W	SPT3	0.730155	0.764861	0.742155	0.686777
YDR393W	SHE9	0.645171	0.466034	0.343587	0.193105
YDR394W	RPT3	0.829234	0.69571	0.464465	0.451278
YDR395W	SXM1	0.900704	0.908583	0.937851	0.934021
YDR396W	YDR396W
YDR397C	NCB2	0.508682	0.798777	0.474707	0.484143
YDR398W	UTP5	0.941753	0.967961	0.970255	0.970906
YDR399W	HPT1	0.928395	0.911487	0.906907	0.932258
YDR400W	URH1	0.807459	0.805475	0.716044	0.495589
YDR401W	YDR401W
YDR402C	DIT2
YDR403W	DIT1
YDR404C	RPB7	0.556214	0.838776	0.520486	0.772003
YDR405W	MRP20	0.762537	0.778904	0.353374	0.290336
YDR406W	PDR15	0.917609	0.827438	0.919903	0.892053
YDR407C	TRS120	0.700629	0.590448	0.688573	0.623371
YDR408C	ADE8	0.879928	0.866243	0.794715	0.554899
YDR409W	SIZ1	0.385531	0.815436	0.413436	0.603471
YDR410C	STE14	0.537605	0.595524	0.731702	0.404324
YDR411C	DFM1	0.786409	0.900109	0.907197	0.73955
YDR412W	RRP17	0.910642	0.957623	0.939735	0.964234
YDR413C	YDR413C
YDR414C	ERD1	0.654702	0.584382	0.708615	0.791181
YDR415C	YDR415C	0.696195	0.710764	0.8296	0.400553
YDR416W	SYF1	0.618817	0.600118	0.625916	0.36583
YDR417C	YDR417C
YDR418W	RPL12B	0.973878	0.945386	0.973475	0.970933
YDR419W	RAD30	0.792168	0.657989	0.686623	0.684178
YDR420W	HKR1	0.619349	0.594637	0.435161	0.522267
YDR421W	ARO80	0.913892	0.760671	0.878435	0.733305
YDR422C	SIP1	0.481711	0.399069	0.623711	0.334013
YDR423C	CAD1	0.900563	0.907676	0.927869	0.902858
YDR424C	DYN2	0.680088	0.66812	0.700161	0.697749
YDR425W	SNX41	0.898219	0.899806	0.940839	0.9126
YDR426C	YDR426C
YDR427W	RPN9	0.718334	0.794576	0.415417	0.411448
YDR428C	BNA7	0.427936	0.37821	0.608137	0.277535
YDR429C	TIF35	0.97884	0.97179	0.980223	0.949252
YDR430C	CYM1	0.394423	0.869157	0.229902	0.767252
YDR431W	YDR431W
YDR432W	NPL3	0.960689	0.926486	0.861465	0.943332
YDR433W	YDR433W
YDR434W	GPI17	0.212108	0.647803	0.511481	0.305844
YDR435C	PPM1	0.89577	0.904827	0.92579	0.936719
YDR436W	PPZ2	0.912476	0.846443	0.902417	0.85214
YDR437W	GPI19
YDR438W	THI74	0.802773	0.923279	0.804263	0.89046
YDR439W	LRS4	0.35549	0.438836	0.326705	0.404626
YDR440W	DOT1	0.767733	0.781466	0.38314	0.312239
YDR441C	APT2	0.832215	0.831352	0.847007	0.541509
YDR442W	YDR442W
YDR443C	SSN2
YDR444W	YDR444W	0.367222	0.665596	0.598012	0.564862
YDR445C	YDR445C
YDR446W	ECM11	0.918077	0.821679	0.940329	0.937099
YDR447C	RPS17B
YDR448W	ADA2
YDR449C	UTP6
YDR450W	RPS18A	0.978105	0.954022	0.974661	0.971887
YDR451C	YHP1	0.847236	0.885335	0.892744	0.887593
YDR452W	PPN1	0.935469	0.86164	0.857125	0.910126
YDR453C	TSA2	0.96548	0.72448	0.942241	0.76484
YDR454C	GUK1	0.977325	0.968895	0.971921	0.939173
YDR455C	YDR455C
YDR456W	NHX1	0.881017	0.850012	0.867508	0.677278
YDR457W	TOM1	0.549079	0.722853	0.588105	0.44275
YDR458C	HEH2	0.653921	0.830079	0.698886	0.661106
YDR459C	PFA5	0.864922	0.839807	0.881755	0.893077
YDR460W	TFB3	0.624973	0.823086	0.786048	0.825181
YDR461W	MFA1
YDR462W	MRPL28	0.546122	0.744173	0.546385	0.460657
YDR463W	STP1	0.81487	0.904049	0.842208	0.824648
YDR464W	SPP41	0.549279	0.786668	0.374531	0.527613
YDR465C	RMT2	0.942694	0.970457	0.965525	0.968144
YDR466W	PKH3	0.735487	0.848669	0.798342	0.815371
YDR467C	YDR467C
YDR468C	TLG1	0.383555	0.663748	0.694512	0.435648
YDR469W	SDC1	0.354562	0.743673	0.348726	0.444271
YDR470C	UGO1	0.493735	0.566401	0.482821	0.279241
YDR471W	RPL27B	0.971949	0.933871	0.97208	0.965907
YDR472W	TRS31	0.676943	0.532708	0.449122	0.502699
YDR473C	PRP3	0.715629	0.824046	0.625363	0.73364
YDR475C	JIP4	0.933204	0.873276	0.934625	0.881381
YDR476C	YDR476C	0.638099	0.852206	0.716122	0.675984
YDR477W	SNF1	0.648864	0.65631	0.616868	0.358742
YDR478W	SNM1	0.522299	0.678043	0.387871	0.622725
YDR479C	PEX29	0.917652	0.927909	0.937819	0.914055
YDR480W	DIG2	0.803332	0.892869	0.890083	0.875452
YDR481C	PHO8	0.745785	0.956132	0.932676	0.926916
YDR482C	CWC21	0.742985	0.745769	0.724806	0.689493
YDR483W	KRE2	0.380635	0.303468	0.304891	0.277607
YDR484W	VPS52	0.704938	0.721598	0.61016	0.713775
YDR485C	VPS72	0.81179	0.885135	0.725268	0.811324
YDR486C	VPS60	0.583041	0.221757	0.698509	0.29668
YDR487C	RIB3	0.678404	0.857648	0.429935	0.50941
YDR488C	PAC11	0.514139	0.601781	0.567849	0.420987
YDR489W	SLD5	0.46909	0.560111	0.576958	0.664875
YDR490C	PKH1	0.905719	0.911733	0.885503	0.906906
YDR491C	YDR491C
YDR492W	IZH1	0.736119	0.739938	0.759167	0.454461
YDR493W	MZM1	0.367053	0.887783	0.336881	0.322049
YDR494W	RSM28	0.498845	0.496727	0.325739	0.501926
YDR495C	VPS3	0.774045	0.748291	0.750574	0.74958
YDR496C	PUF6	0.970478	0.971464	0.961278	0.966469
YDR497C	ITR1	0.953932	0.94709	0.954884	0.9043
YDR498C	SEC20	0.542039	0.659882	0.398986	0.429755
YDR499W	LCD1	0.541081	0.68221	0.574145	0.511073
YDR500C	RPL37B
YDR501W	PLM2	0.724213	0.877629	0.803868	0.746002
YDR502C	SAM2	0.945134	0.956766	0.933206	0.911183
YDR503C	LPP1	0.519514	0.65857	0.433246	0.885682
YDR504C	SPG3
YDR505C	PSP1	0.664229	0.660122	0.832804	0.889832
YDR506C	GMC1
YDR507C	GIN4	0.580804	0.766674	0.46997	0.535225
YDR508C	GNP1	0.851875	0.922867	0.95098	0.951278
YDR509W	YDR509W
YDR510W	SMT3	0.882608	0.820596	0.655117	0.70615
YDR511W	SDH7	0.736111	0.60471	0.709257	0.854773
YDR512C	EMI1	0.855486	0.684588	0.908842	0.862813
YDR513W	GRX2	0.971909	0.951477	0.940452	0.947243
YDR514C	YDR514C	0.300025	0.620798	0.34821	0.425249
YDR515W	SLF1
YDR516C	EMI2	0.895241	0.882203	0.938888	0.924524
YDR517W	GRH1	0.833288	0.696392	0.831301	0.647249
YDR518W	EUG1	0.535863	0.478188	0.373779	0.391074
YDR519W	FPR2	0.320192	0.779722	0.198467	0.579749
YDR520C	URC2	0.70694	0.744319	0.757948	0.787112
YDR521W	YDR521W
YDR522C	SPS2
YDR523C	SPS1	0.338189	0.749603	0.334641	0.741328
YDR524C	AGE1	0.425542	0.6945	0.482396	0.504761
YDR525W	API2
YDR526C	YDR526C
YDR527W	RBA50	0.658087	0.548944	0.777695	0.620464
YDR528W	HLR1	0.444013	0.611382	0.441105	0.527216
YDR529C	QCR7	0.94914	0.900966	0.933273	0.808492
YDR530C	APA2	0.956204	0.925395	0.954678	0.936994
YDR531W	CAB1	0.392927	0.47923	0.22532	0.547446
YDR532C	KRE28	0.701755	0.820532	0.745162	0.563819
YDR533C	HSP31	0.949303	0.850356	0.943845	0.950251
YDR534C	FIT1	0.699611	0.851819	0.837866	0.440713
YDR535C	YDR535C
YDR536W	STL1	0.854271	0.89654	0.743382	0.901656
YDR537C	YDR537C
YDR538W	PAD1	0.570645	0.360444	0.385543	0.360413
YDR539W	FDC1	0.622812	0.585049	0.696056	0.476248
YDR540C	IRC4
YDR541C	YDR541C
YDR542W	PAU10
YDR543C	YDR543C
YDR544C	YDR544C
YDR545W	YRF1-1
YEL001C	IRC22	0.833262	0.76511	0.852669	0.802973
YEL002C	WBP1	0.71688	0.672118	0.340559	0.404801
YEL003W	GIM4	0.92463	0.943526	0.839266	0.961213
YEL004W	YEA4	0.661582	0.490582	0.655699	0.562113
YEL005C	VAB2	0.906388	0.726196	0.918434	0.822918
YEL006W	YEA6	0.902369	0.912214	0.896515	0.920644
YEL007W	MIT1	0.578991	0.493165	0.518897	0.631077
YEL008W	YEL008W
YEL009C	GCN4	0.801627	0.866215	0.752625	0.734383
YEL010W	YEL010W
YEL011W	GLC3	0.977272	0.952433	0.977216	0.977936
YEL012W	UBC8	0.973922	0.970884	0.952847	0.969949
YEL013W	VAC8	0.572597	0.448465	0.708424	0.541549
YEL014C	YEL014C
YEL015W	EDC3	0.537964	0.492897	0.276474	0.453918
YEL016C	NPP2	0.849207	0.928113	0.849468	0.937228
YEL017W	GTT3	0.816125	0.853282	0.924684	0.620407
YEL018W	EAF5	0.744345	0.682161	0.817827	0.804213
YEL019C	MMS21
YEL020C	PXP1	0.894673	0.927171	0.901879	0.947222
YEL021W	URA3
YEL022W	GEA2	0.75801	0.594951	0.701171	0.86485
YEL023C	YEL023C	0.797142	0.776456	0.563326	0.689689
YEL024W	RIP1	0.925861	0.756913	0.90006	0.827008
YEL025C	YEL025C	0.810976	0.673181	0.83679	0.83283
YEL026W	SNU13	0.979224	0.976674	0.981445	0.98102
YEL027W	VMA3	0.918024	0.821394	0.713525	0.797183
YEL028W	YEL028W
YEL029C	BUD16	0.444167	0.642005	0.460249	0.519462
YEL030W	ECM10	0.777126	0.921132	0.579801	0.915131
YEL031W	SPF1	0.954339	0.903767	0.694563	0.939816
YEL032W	MCM3	0.663593	0.849187	0.661254	0.748803
YEL033W	MTC7
YEL034W	HYP2	0.977023	0.966705	0.972374	0.972709
YEL035C	UTR5
YEL036C	ANP1	0.736817	0.927796	0.903535	0.87527
YEL037C	RAD23	0.830475	0.952971	0.887494	0.922749
YEL038W	UTR4	0.616874	0.57773	0.570608	0.850306
YEL039C	CYC7	0.9539	0.863911	0.95488	0.961146
YEL040W	UTR2	0.964235	0.960313	0.929514	0.959174
YEL041W	YEF1	0.946558	0.914099	0.959914	0.927938
YEL042W	GDA1	0.970312	0.652107	0.961021	0.814672
YEL043W	YEL043W	0.500829	0.456594	0.445357	0.388082
YEL044W	IES6	0.521145	0.798256	0.298672	0.436688
YEL045C	YEL045C
YEL046C	GLY1	0.887647	0.800274	0.872552	0.8039
YEL047C	FRD1	0.260169	0.456965	0.311353	0.492073
YEL048C	TCA17
YEL049W	PAU2
YEL050C	RML2	0.592163	0.8508	0.711424	0.765923
YEL051W	VMA8	0.427725	0.888713	0.368962	0.761422
YEL052W	AFG1	0.827189	0.894667	0.829389	0.874329
YEL053C	MAK10	0.738456	0.440725	0.850105	0.730715
YEL054C	RPL12A	0.96872	0.959456	0.971066	0.974042
YEL055C	POL5	0.961502	0.841183	0.946569	0.891391
YEL056W	HAT2	0.537362	0.638734	0.338975	0.552363
YEL057C	SDD1
YEL058W	PCM1	0.483578	0.92245	0.458185	0.62552
YEL059W	HHY1
YEL060C	PRB1	0.960377	0.972798	0.964491	0.97014
YEL061C	CIN8	0.710306	0.874656	0.779352	0.725494
YEL062W	NPR2	0.882091	0.823313	0.905739	0.834899
YEL063C	CAN1	0.966043	0.933793	0.935428	0.951993
YEL064C	AVT2	0.90596	0.913535	0.902906	0.907455
YEL065W	SIT1	0.805031	0.777639	0.884	0.771478
YEL066W	HPA3	0.961078	0.967369	0.95407	0.960307
YEL067C	YEL067C
YEL068C	YEL068C	0.696537	0.863772	0.661233	0.892286
YEL069C	HXT13
YEL070W	DSF1
YEL071W	DLD3	0.824682	0.942336	0.905068	0.927966
YEL072W	RMD6	0.96319	0.912881	0.965515	0.899101
YEL073C	YEL073C	0.919735	0.71244	0.931315	0.884734
YEL074W	YEL074W
YEL075C	YEL075C
YEL076C	YEL076C
YEL077C	YEL077C
YER001W	MNN1	0.73151	0.585041	0.682272	0.289434
YER002W	NOP16	0.900567	0.953814	0.936437	0.946518
YER003C	PMI40	0.772624	0.614498	0.50656	0.439161
YER004W	FMP52	0.597631	0.73275	0.668788	0.833938
YER005W	YND1	0.774135	0.694375	0.631625	0.650399
YER006W	NUG1	0.970436	0.936706	0.965558	0.970411
YER007W	PAC2	0.506175	0.800819	0.439454	0.863198
YER008C	SEC3	0.598514	0.743951	0.425897	0.373706
YER009W	NTF2	0.966882	0.940696	0.975006	0.86339
YER010C	YER010C	0.849179	0.544279	0.850906	0.803826
YER011W	TIR1	0.95266	0.941517	0.941644	0.944705
YER012W	PRE1	0.485229	0.712473	0.312515	0.543031
YER013W	PRP22	0.60472	0.829293	0.655437	0.883886
YER014W	HEM14	0.776126	0.83	0.721799	0.829783
YER015W	FAA2	0.908151	0.938294	0.927828	0.936776
YER016W	BIM1	0.612556	0.498637	0.457948	0.438194
YER017C	AFG3	0.540268	0.698608	0.405487	0.7271
YER018C	SPC25	0.870679	0.879302	0.912022	0.907251
YER019W	ISC1	0.735636	0.721671	0.836977	0.85556
YER020W	GPA2	0.92529	0.865788	0.932631	0.887687
YER021W	RPN3	0.567368	0.600837	0.580595	0.600056
YER022W	SRB4	0.822735	0.668759	0.707697	0.501472
YER023W	PRO3	0.671614	0.664132	0.752201	0.396956
YER024W	YAT2	0.965431	0.928823	0.942985	0.939471
YER025W	GCD11	0.891412	0.958285	0.931258	0.963873
YER026C	CHO1	0.900845	0.934833	0.948434	0.951899
YER027C	GAL83	0.690042	0.76254	0.602435	0.342298
YER028C	MIG3	0.642838	0.908091	0.462305	0.58609
YER029C	SMB1	0.340326	0.689166	0.495204	0.651505
YER030W	CHZ1	0.776371	0.603391	0.644643	0.611648
YER031C	YPT31	0.845909	0.894392	0.681064	0.629224
YER032W	FIR1	0.567444	0.800763	0.51486	0.61619
YER033C	ZRG8	0.893547	0.913093	0.921318	0.897313
YER034W	YER034W	0.618239	0.622122	0.617397	0.485647
YER035W	EDC2	0.944143	0.898655	0.935652	0.93012
YER036C	ARB1	0.900858	0.968539	0.944265	0.937992
YER037W	PHM8	0.970646	0.969006	0.975026	0.974902
YER038C	KRE29	0.900541	0.909598	0.80122	0.872487
YER039C	HVG1
YER040W	GLN3	0.88937	0.918491	0.904006	0.871549
YER041W	YEN1	0.897622	0.826151	0.795168	0.876375
YER042W	MXR1	0.950773	0.943185	0.901085	0.935758
YER043C	SAH1	0.948828	0.821691	0.930812	0.923026
YER044C	ERG28	0.882318	0.752925	0.737519	0.78537
YER045C	ACA1	0.780223	0.786829	0.698961	0.863557
YER046W	SPO73	0.928172	0.931861	0.928567	0.956246
YER047C	SAP1	0.719798	0.808849	0.639542	0.45008
YER048C	CAJ1	0.485709	0.699876	0.361601	0.500086
YER049W	TPA1	0.965027	0.894187	0.9436	0.967547
YER050C	RSM18	0.625951	0.720993	0.607151	0.339846
YER051W	JHD1	0.876573	0.913952	0.889872	0.883574
YER052C	HOM3	0.908052	0.844992	0.85189	0.815687
YER053C	PIC2	0.966771	0.94146	0.968592	0.969928
YER054C	GIP2	0.961141	0.726822	0.960322	0.965275
YER055C	HIS1	0.761104	0.933536	0.776765	0.798388
YER056C	FCY2	0.85116	0.924418	0.723138	0.684546
YER057C	HMF1	0.698657	0.934546	0.860149	0.790428
YER058W	PET117	0.868904	0.837389	0.828666	0.905708
YER059W	PCL6	0.892768	0.872303	0.912712	0.85029
YER060W	FCY21	0.700421	0.882927	0.807385	0.922621
YER061C	CEM1	0.859409	0.876956	0.912827	0.907558
YER062C	GPP2	0.934317	0.642557	0.888565	0.838825
YER063W	THO1	0.739563	0.901059	0.866974	0.783886
YER064C	VHR2	0.941505	0.972685	0.947357	0.935569
YER065C	ICL1	0.924026	0.93808	0.922746	0.922522
YER066W	RRT13
YER067W	RGI1	0.957014	0.91606	0.96388	0.966724
YER068W	MOT2	0.393833	0.556889	0.477092	0.193572
YER069W	ARG5,6	0.969302	0.971506	0.963028	0.948292
YER070W	RNR1	0.921526	0.704791	0.839357	0.700112
YER071C	TDA2	0.76788	0.851166	0.645672	0.907087
YER072W	VTC1	0.853472	0.814456	0.838975	0.720932
YER073W	ALD5	0.743405	0.765994	0.57768	0.665585
YER074W	RPS24A	0.978028	0.957027	0.973953	0.973936
YER075C	PTP3	0.620761	0.663929	0.576721	0.492531
YER076C	YER076C	0.838039	0.708876	0.81084	0.384226
YER077C	MRX1	0.343314	0.351922	0.386119	0.274361
YER078C	ICP55	0.486616	0.470682	0.376419	0.568854
YER079W	YER079W	0.966775	0.971169	0.97213	0.972574
YER080W	AIM9	0.395645	0.704433	0.596128	0.789778
YER081W	SER3	0.955596	0.545746	0.886138	0.827286
YER082C	UTP7	0.891306	0.863987	0.960216	0.931404
YER083C	GET2	0.796437	0.736561	0.521183	0.466078
YER084W	YER084W	0.925923	0.902614	0.935408	0.838599
YER085C	YER085C
YER086W	ILV1	0.890668	0.922158	0.592366	0.771258
YER087W	AIM10	0.749653	0.528706	0.720489	0.238464
YER088C	DOT6	0.850342	0.866025	0.840856	0.910688
YER089C	PTC2	0.762006	0.825374	0.754792	0.616291
YER090W	TRP2	0.721619	0.77623	0.704473	0.624617
YER091C	MET6	0.955466	0.962855	0.959154	0.960651
YER092W	IES5	0.924186	0.875861	0.944091	0.870527
YER093C	TSC11	0.688707	0.748592	0.744136	0.442232
YER094C	PUP3	0.726935	0.823095	0.65002	0.416846
YER095W	RAD51	0.825667	0.67342	0.652318	0.479125
YER096W	SHC1	0.938803	0.681161	0.923353	0.873957
YER097W	YER097W
YER098W	UBP9	0.851474	0.826334	0.916402	0.823498
YER099C	PRS2	0.47975	0.45232	0.268108	0.365444
YER100W	UBC6	0.286062	0.607481	0.268609	0.348489
YER101C	AST2	0.85906	0.786623	0.806368	0.882871
YER102W	RPS8B	0.971376	0.952307	0.973101	0.97449
YER103W	SSA4	0.910731	0.743823	0.884069	0.756313
YER104W	RTT105	0.852044	0.864696	0.887064	0.889726
YER105C	NUP157	0.621232	0.742374	0.352764	0.443257
YER106W	MAM1
YER107C	GLE2	0.413804	0.608488	0.525164	0.464347
YER109C	FLO8
YER110C	KAP123	0.975126	0.945101	0.971183	0.964412
YER111C	SWI4	0.492294	0.519424	0.646961	0.659597
YER112W	LSM4	0.595089	0.473985	0.347348	0.387136
YER113C	TMN3	0.644039	0.668009	0.685076	0.681361
YER114C	BOI2	0.598824	0.708741	0.598625	0.50201
YER115C	SPR6	0.486028	0.638869	0.324084	0.303695
YER116C	SLX8
YER117W	RPL23B	0.975183	0.962286	0.97438	0.972115
YER118C	SHO1	0.885755	0.724782	0.864443	0.874565
YER119C	AVT6	0.954519	0.96868	0.966757	0.968854
YER120W	SCS2	0.876561	0.773838	0.496853	0.483733
YER121W	YER121W	0.944462	0.868798	0.94578	0.873547
YER122C	GLO3	0.59755	0.534988	0.361475	0.391159
YER123W	YCK3	0.343617	0.446369	0.38382	0.41755
YER124C	DSE1	0.865875	0.942091	0.919454	0.913654
YER125W	RSP5	0.458036	0.595115	0.470584	0.215663
YER126C	NSA2	0.925066	0.962801	0.952674	0.958365
YER127W	LCP5	0.90454	0.922877	0.947745	0.952359
YER128W	VFA1	0.752551	0.915604	0.828258	0.898113
YER129W	SAK1	0.627991	0.484203	0.642212	0.272494
YER130C	COM2	0.407635	0.491077	0.206231	0.484354
YER131W	RPS26B	0.973929	0.951976	0.97445	0.971215
YER132C	PMD1	0.654491	0.71635	0.783393	0.729124
YER133W	GLC7
YER134C	YER134C	0.633742	0.5851	0.769704	0.195658
YER135C	YER135C
YER136W	GDI1	0.6776	0.653174	0.821622	0.550431
YER137C	YER137C	0.479913	0.531769	0.745746	0.389677
YER138C	YER138C
YER139C	RTR1	0.875485	0.859866	0.879306	0.878133
YER140W	EMP65	0.741974	0.827403	0.613661	0.83819
YER141W	COX15	0.832112	0.689144	0.87976	0.70799
YER142C	MAG1	0.901394	0.857012	0.908932	0.897636
YER143W	DDI1	0.76024	0.590884	0.864313	0.71678
YER144C	UBP5	0.487152	0.453332	0.591961	0.542672
YER145C	FTR1	0.702146	0.937018	0.834043	0.737746
YER146W	LSM5	0.761344	0.782886	0.606722	0.595084
YER147C	SCC4	0.802099	0.237283	0.759954	0.247379
YER148W	SPT15	0.743291	0.679554	0.880334	0.76889
YER149C	PEA2	0.78067	0.552145	0.537232	0.349956
YER150W	SPI1	0.962029	0.935547	0.938394	0.969527
YER151C	UBP3	0.71742	0.513754	0.701349	0.7699
YER152C	YER152C	0.843656	0.953295	0.926785	0.953712
YER153C	PET122
YER154W	OXA1	0.741465	0.628713	0.783899	0.64721
YER155C	BEM2	0.443256	0.518164	0.410855	0.323069
YER156C	YER156C	0.898068	0.951473	0.922994	0.911999
YER157W	COG3	0.689186	0.815127	0.63651	0.863668
YER158C	YER158C	0.950565	0.873624	0.942999	0.914688
YER159C	BUR6	0.943772	0.959942	0.815291	0.79441
YER160C	YER160C
YER161C	SPT2	0.259062	0.321379	0.307075	0.111171
YER162C	RAD4	0.943556	0.901811	0.925762	0.888026
YER163C	GCG1	0.8986	0.646962	0.87145	0.71121
YER164W	CHD1	0.618745	0.723245	0.4645	0.511693
YER165W	PAB1	0.930912	0.960181	0.931808	0.934407
YER166W	DNF1	0.508984	0.934623	0.484591	0.5964
YER167W	BCK2	0.579235	0.483776	0.33852	0.284794
YER168C	CCA1	0.642851	0.714649	0.599055	0.666032
YER169W	RPH1	0.871727	0.658451	0.711355	0.49491
YER170W	ADK2	0.537768	0.852326	0.793817	0.803227
YER171W	RAD3	0.474482	0.501013	0.610935	0.355874
YER172C	BRR2	0.421586	0.775225	0.333423	0.349904
YER173W	RAD24	0.676185	0.756929	0.751337	0.336136
YER174C	GRX4	0.856094	0.942043	0.754112	0.890412
YER175C	TMT1	0.972715	0.942119	0.968807	0.958144
YER176W	ECM32	0.834856	0.693123	0.475609	0.303585
YER177W	BMH1	0.870629	0.821909	0.907781	0.925719
YER178W	PDA1	0.801699	0.798869	0.903956	0.830731
YER179W	DMC1
YER180C	ISC10	0.596398	0.763123	0.710736	0.734605
YER181C	YER181C
YER182W	FMP10	0.801781	0.637444	0.856766	0.780121
YER183C	FAU1	0.399599	0.771416	0.339165	0.779593
YER184C	TOG1
YER185W	PUG1	0.914012	0.838876	0.830504	0.805343
YER186C	YER186C
YER187W	YER187W
YER188W	YER188W
YER189W	YER189W
YER190W	YRF1-2
YFL001W	DEG1	0.864069	0.81986	0.880856	0.884511
YFL002C	SPB4	0.72923	0.821444	0.799503	0.867784
YFL003C	MSH4
YFL004W	VTC2	0.388366	0.960295	0.750056	0.894285
YFL005W	SEC4	0.542764	0.471928	0.805024	0.691451
YFL007W	BLM10	0.645294	0.754484	0.440029	0.602917
YFL008W	SMC1	0.435443	0.780814	0.483621	0.503243
YFL009W	CDC4	0.835755	0.58523	0.615898	0.768415
YFL010C	WWM1	0.821552	0.94125	0.847438	0.81456
YFL011W	HXT10
YFL012W	YFL012W
YFL013C	IES1	0.928144	0.88195	0.864457	0.882281
YFL014W	HSP12	0.977832	0.785081	0.966248	0.973276
YFL015C	YFL015C
YFL016C	MDJ1	0.437609	0.70385	0.308638	0.576336
YFL017C	GNA1	0.380576	0.47962	0.616449	0.331708
YFL018C	LPD1	0.714924	0.938951	0.772687	0.957661
YFL019C	YFL019C
YFL020C	PAU5
YFL021W	GAT1	0.956833	0.970953	0.967328	0.96799
YFL022C	FRS2	0.964113	0.977192	0.974329	0.945368
YFL023W	BUD27	0.93289	0.881894	0.919407	0.921137
YFL024C	EPL1	0.564238	0.659007	0.547971	0.410448
YFL025C	BST1	0.295467	0.502252	0.276578	0.247837
YFL026W	STE2	0.923672	0.897618	0.889272	0.87211
YFL027C	GYP8	0.843428	0.91001	0.81346	0.931937
YFL028C	CAF16	0.9483	0.797697	0.878438	0.740426
YFL029C	CAK1	0.775169	0.623555	0.801168	0.770464
YFL030W	AGX1	0.966193	0.965434	0.968017	0.971976
YFL031W	HAC1	0.598816	0.772529	0.770134	0.811787
YFL032W	YFL032W
YFL033C	RIM15	0.927682	0.952231	0.892376	0.926925
YFL034W	MIL1	0.644102	0.671461	0.757404	0.60761
YFL036W	RPO41	0.569014	0.79135	0.550463	0.405066
YFL037W	TUB2	0.933766	0.864048	0.703917	0.774446
YFL038C	YPT1	0.814145	0.929213	0.73028	0.938987
YFL039C	ACT1	0.945795	0.85795	0.89281	0.881527
YFL040W	YFL040W
YFL041W	FET5	0.486807	0.39872	0.577554	0.335447
YFL042C	LAM5	0.92558	0.855781	0.932103	0.887636
YFL044C	OTU1
YFL045C	SEC53	0.973849	0.960008	0.947403	0.918847
YFL046W	FMP32	0.758675	0.539409	0.846443	0.286809
YFL047W	RGD2	0.402349	0.770408	0.105572	0.358886
YFL048C	EMP47	0.726085	0.734135	0.5207	0.539161
YFL049W	SWP82	0.819692	0.628713	0.737389	0.515554
YFL050C	ALR2	0.85381	0.814582	0.796657	0.840295
YFL051C	YFL051C
YFL052W	ZNF1
YFL053W	DAK2
YFL054C	AQY3	0.94995	0.752919	0.941018	0.657128
YFL055W	AGP3	0.968642	0.940541	0.965056	0.95443
YFL056C	AAD6
YFL057C	AAD16
YFL058W	THI5
YFL059W	SNZ3
YFL060C	SNO3
YFL061W	DDI2
YFL062W	COS4
YFL063W	YFL063W
YFL064C	YFL064C
YFL065C	YFL065C
YFL066C	YFL066C
YFL067W	YFL067W
YFL068W	YFL068W
YFR001W	LOC1	0.914073	0.956219	0.972265	0.936333
YFR002W	NIC96	0.397081	0.570711	0.446833	0.323938
YFR003C	YPI1	0.877234	0.755295	0.919107	0.893458
YFR004W	RPN11	0.273603	0.724717	0.545827	0.444071
YFR005C	SAD1	0.556095	0.476756	0.784744	0.367184
YFR006W	YFR006W	0.365178	0.376674	0.261931	0.265767
YFR007W	YFH7	0.683724	0.904382	0.690236	0.935009
YFR008W	FAR7	0.902741	0.892344	0.888765	0.907899
YFR009W	GCN20	0.829194	0.86507	0.720323	0.830728
YFR010W	UBP6	0.608973	0.433298	0.493073	0.580674
YFR011C	MIC19	0.580189	0.712387	0.673076	0.862262
YFR012W	DCV1
YFR013W	IOC3	0.428044	0.529077	0.375119	0.600596
YFR014C	CMK1	0.911421	0.913739	0.932277	0.945842
YFR015C	GSY1	0.961634	0.868392	0.959336	0.96947
YFR016C	AIP5	0.592128	0.886974	0.757762	0.829559
YFR017C	IGD1	0.964792	0.896813	0.971103	0.973077
YFR018C	YFR018C	0.670237	0.550196	0.45206	0.480994
YFR019W	FAB1	0.868797	0.841177	0.902015	0.674872
YFR020W	CSS2	0.850954	0.952853	0.742085	0.938571
YFR021W	ATG18	0.714008	0.568851	0.689408	0.762412
YFR022W	ROG3	0.915586	0.910486	0.92429	0.921663
YFR023W	PES4
YFR025C	HIS2	0.895029	0.941565	0.935956	0.934659
YFR026C	ULI1
YFR027W	ECO1	0.389129	0.367693	0.603852	0.527629
YFR028C	CDC14	0.722613	0.637006	0.544452	0.555271
YFR029W	PTR3	0.86965	0.915288	0.880019	0.880643
YFR030W	MET10	0.959717	0.966731	0.957572	0.964506
YFR031C	SMC2	0.557832	0.729255	0.614955	0.353064
YFR032C	RRT5
YFR033C	QCR6	0.751138	0.870146	0.650128	0.879484
YFR034C	PHO4	0.740209	0.77856	0.69386	0.793965
YFR035C	YFR035C
YFR036W	CDC26	0.570589	0.290277	0.689667	0.311658
YFR037C	RSC8	0.804785	0.675865	0.589133	0.412442
YFR038W	IRC5	0.501416	0.504986	0.332412	0.285042
YFR039C	OSW7	0.631165	0.70536	0.72359	0.497455
YFR040W	SAP155	0.64205	0.808213	0.482615	0.675201
YFR041C	ERJ5	0.289777	0.616882	0.592305	0.52688
YFR042W	KEG1	0.727451	0.63912	0.816905	0.845729
YFR043C	IRC6	0.857547	0.384606	0.779804	0.541769
YFR044C	DUG1	0.712183	0.848803	0.578115	0.51835
YFR045W	YFR045W	0.725925	0.664903	0.778393	0.871084
YFR046C	CNN1	0.829051	0.827155	0.842053	0.862399
YFR047C	BNA6	0.932478	0.932857	0.905015	0.924012
YFR048W	RMD8	0.363464	0.51235	0.347726	0.265413
YFR049W	YMR31	0.893123	0.953271	0.961383	0.938277
YFR050C	PRE4	0.282708	0.728799	0.37672	0.286919
YFR051C	RET2	0.746654	0.588278	0.894153	0.464206
YFR052W	RPN12	0.39139	0.567254	0.326822	0.407082
YFR053C	HXK1	0.956744	0.861086	0.972412	0.963091
YFR054C	YFR054C
YFR055W	IRC7	0.851676	0.863424	0.610871	0.847273
YFR056C	YFR056C
YFR057W	YFR057W
YGL001C	ERG26	0.519176	0.901337	0.805559	0.624227
YGL002W	ERP6	0.826679	0.763717	0.847201	0.713479
YGL003C	CDH1	0.87274	0.793788	0.781961	0.820494
YGL004C	RPN14	0.735199	0.635743	0.763398	0.789287
YGL005C	COG7	0.872609	0.5356	0.848341	0.527127
YGL006W	PMC1	0.963897	0.924162	0.956743	0.938166
YGL007W	BRP1
YGL008C	PMA1	0.934027	0.783921	0.879718	0.894592
YGL009C	LEU1	0.887581	0.907167	0.67613	0.523811
YGL010W	MPO1	0.923137	0.635272	0.927433	0.813797
YGL011C	SCL1	0.751124	0.680323	0.575252	0.420894
YGL012W	ERG4	0.909095	0.472075	0.718084	0.846207
YGL013C	PDR1	0.315437	0.460634	0.236238	0.344541
YGL014W	PUF4	0.750648	0.685487	0.757518	0.883574
YGL015C	YGL015C
YGL016W	KAP122	0.932965	0.871889	0.895182	0.900712
YGL017W	ATE1	0.668938	0.499093	0.620832	0.636371
YGL018C	JAC1	0.525712	0.231892	0.649558	0.525427
YGL019W	CKB1	0.430447	0.827069	0.416224	0.39546
YGL020C	GET1	0.891647	0.662301	0.50122	0.520041
YGL021W	ALK1	0.740199	0.913738	0.894679	0.880027
YGL022W	STT3	0.937059	0.787704	0.910288	0.77229
YGL023C	PIB2	0.649866	0.895683	0.779574	0.831132
YGL024W	YGL024W
YGL025C	PGD1	0.468179	0.45709	0.767678	0.671293
YGL026C	TRP5	0.551187	0.932319	0.903747	0.811578
YGL027C	CWH41	0.625454	0.887112	0.353616	0.606094
YGL028C	SCW11	0.780841	0.886958	0.660322	0.775838
YGL029W	CGR1	0.959803	0.937898	0.974809	0.973
YGL030W	RPL30	0.975464	0.959366	0.975325	0.975057
YGL031C	RPL24A	0.975104	0.953235	0.972356	0.972168
YGL032C	AGA2	0.825349	0.871933	0.861441	0.809218
YGL033W	HOP2
YGL034C	YGL034C
YGL035C	MIG1	0.837052	0.763625	0.763111	0.615081
YGL036W	YGL036W	0.633691	0.70383	0.413883	0.516534
YGL037C	PNC1	0.943402	0.880442	0.973472	0.962982
YGL038C	OCH1	0.855454	0.638896	0.866556	0.908968
YGL039W	YGL039W	0.726922	0.502688	0.469129	0.549127
YGL040C	HEM2	0.319906	0.857942	0.418292	0.374246
YGL041C	YGL041C
YGL042C	YGL042C
YGL043W	DST1	0.808441	0.838721	0.743111	0.866903
YGL044C	RNA15	0.132278	0.504834	0.288685	0.326122
YGL045W	RIM8	0.928385	0.830938	0.926202	0.831858
YGL047W	ALG13	0.868062	0.686949	0.860616	0.897983
YGL048C	RPT6	0.827186	0.916586	0.39559	0.480189
YGL049C	TIF4632	0.543778	0.845287	0.619161	0.654531
YGL050W	TYW3	0.14947	0.451929	0.181125	0.496306
YGL051W	MST27
YGL052W	YGL052W
YGL053W	PRM8
YGL054C	ERV14	0.527063	0.795293	0.435851	0.569004
YGL055W	OLE1	0.916463	0.878533	0.784903	0.796473
YGL056C	SDS23	0.509865	0.406744	0.521357	0.35063
YGL057C	GEP7	0.775636	0.589238	0.800185	0.207376
YGL058W	RAD6	0.502531	0.288545	0.690234	0.314687
YGL059W	PKP2	0.965291	0.931157	0.965142	0.954784
YGL060W	YBP2	0.396996	0.254586	0.488726	0.211194
YGL061C	DUO1	0.225685	0.619128	0.224505	0.438528
YGL062W	PYC1	0.966815	0.969392	0.965129	0.95042
YGL063W	PUS2
YGL064C	MRH4	0.724726	0.815729	0.777932	0.645122
YGL065C	ALG2	0.344169	0.543823	0.505128	0.451161
YGL066W	SGF73	0.661118	0.839993	0.762466	0.812609
YGL067W	NPY1	0.449589	0.619652	0.385063	0.626686
YGL068W	MNP1	0.665012	0.91466	0.705595	0.768638
YGL069C	YGL069C
YGL070C	RPB9	0.701783	0.589038	0.596464	0.485241
YGL071W	AFT1	0.619138	0.65463	0.41054	0.171993
YGL072C	YGL072C
YGL073W	HSF1	0.78137	0.831304	0.812394	0.697837
YGL074C	YGL074C
YGL075C	MPS2	0.601734	0.824002	0.560411	0.7764
YGL076C	RPL7A
YGL077C	HNM1	0.806672	0.957508	0.910611	0.944786
YGL078C	DBP3	0.970869	0.953524	0.973868	0.973353
YGL079W	KXD1	0.504419	0.695296	0.489982	0.59518
YGL080W	MPC1	0.702039	0.555865	0.528358	0.618198
YGL081W	YGL081W	0.917985	0.912908	0.914866	0.959108
YGL082W	YGL082W	0.719686	0.840811	0.876823	0.864927
YGL083W	SCY1	0.616227	0.398109	0.330166	0.543937
YGL084C	GUP1	0.315384	0.425532	0.665385	0.310486
YGL085W	LCL3	0.716608	0.575607	0.692343	0.769455
YGL086W	MAD1	0.399448	0.500176	0.282755	0.584426
YGL087C	MMS2	0.924716	0.86131	0.942594	0.923211
YGL088W	YGL088W
YGL089C	MF(ALPHA)2
YGL090W	LIF1	0.912165	0.940418	0.772105	0.912974
YGL091C	NBP35	0.730308	0.701424	0.78514	0.803162
YGL092W	NUP145	0.829714	0.578895	0.725075	0.557379
YGL093W	SPC105	0.844833	0.886272	0.901009	0.874108
YGL094C	PAN2	0.427674	0.516813	0.250357	0.459118
YGL095C	VPS45	0.808894	0.836078	0.852046	0.845731
YGL096W	TOS8	0.963833	0.973335	0.971325	0.972702
YGL097W	SRM1	0.853095	0.511986	0.848506	0.61732
YGL098W	USE1
YGL099W	LSG1	0.935831	0.959988	0.964605	0.962829
YGL100W	SEH1	0.678548	0.495158	0.383798	0.338311
YGL101W	YGK1	0.688439	0.863947	0.835684	0.76665
YGL102C	YGL102C
YGL103W	RPL28	0.975451	0.960606	0.973416	0.974404
YGL104C	VPS73	0.934007	0.706815	0.912284	0.873361
YGL105W	ARC1	0.962232	0.924662	0.883877	0.854679
YGL106W	MLC1	0.901243	0.690772	0.431364	0.385261
YGL107C	RMD9
YGL108C	YGL108C	0.175435	0.808953	0.504744	0.727878
YGL109W	YGL109W
YGL110C	CUE3	0.666489	0.829666	0.333955	0.687731
YGL111W	NSA1	0.932954	0.942471	0.941899	0.953272
YGL112C	TAF6	0.752462	0.463006	0.45562	0.327364
YGL113W	SLD3	0.511963	0.702241	0.346438	0.540971
YGL114W	YGL114W	0.845294	0.914361	0.799157	0.924858
YGL115W	SNF4	0.336364	0.518107	0.420476	0.845953
YGL116W	CDC20	0.46057	0.489847	0.554886	0.378809
YGL117W	YGL117W	0.966482	0.879424	0.962329	0.911702
YGL118C	YGL118C
YGL119W	COQ8	0.250676	0.721756	0.224142	0.766769
YGL120C	PRP43	0.955759	0.926155	0.964914	0.965377
YGL121C	GPG1	0.975072	0.943727	0.972605	0.946872
YGL122C	NAB2	0.713489	0.688522	0.772848	0.80096
YGL123W	RPS2	0.977939	0.963049	0.976503	0.975759
YGL124C	MON1	0.950257	0.959183	0.933523	0.957404
YGL125W	MET13	0.957305	0.965777	0.953896	0.967089
YGL126W	SCS3	0.598552	0.673678	0.551193	0.516549
YGL127C	SOH1	0.807615	0.765311	0.756787	0.865441
YGL128C	CWC23	0.85136	0.649897	0.87689	0.540641
YGL129C	RSM23	0.467671	0.641467	0.455429	0.540048
YGL130W	CEG1	0.670037	0.789317	0.731552	0.50908
YGL131C	SNT2
YGL132W	YGL132W
YGL133W	ITC1	0.433935	0.486714	0.302815	0.312229
YGL134W	PCL10	0.589965	0.857296	0.67443	0.778405
YGL135W	RPL1B	0.967862	0.952071	0.969769	0.969926
YGL136C	MRM2	0.838034	0.472516	0.805811	0.357489
YGL137W	SEC27	0.712194	0.742204	0.435322	0.510463
YGL138C	YGL138C
YGL139W	FLC3	0.69775	0.578751	0.314668	0.418576
YGL140C	YGL140C	0.81797	0.91409	0.897813	0.78732
YGL141W	HUL5	0.920563	0.856733	0.899074	0.891246
YGL142C	GPI10	0.733832	0.585476	0.670823	0.636601
YGL143C	MRF1	0.741292	0.560559	0.60375	0.703072
YGL144C	ROG1	0.74225	0.718738	0.496764	0.593854
YGL145W	TIP20	0.295502	0.421223	0.289691	0.573969
YGL146C	RRT6	0.862381	0.597897	0.909299	0.591443
YGL147C	RPL9A	0.978789	0.964299	0.972844	0.975587
YGL148W	ARO2	0.967842	0.893828	0.952459	0.797677
YGL149W	YGL149W
YGL150C	INO80	0.435974	0.636916	0.297935	0.29551
YGL151W	NUT1	0.357961	0.55439	0.514504	0.320879
YGL152C	YGL152C
YGL153W	PEX14	0.698036	0.913828	0.884651	0.879319
YGL154C	LYS5	0.946155	0.805908	0.942151	0.804675
YGL155W	CDC43	0.481541	0.327378	0.484005	0.453719
YGL156W	AMS1	0.96438	0.964208	0.962759	0.973129
YGL157W	ARI1	0.466203	0.62824	0.726424	0.380168
YGL158W	RCK1
[truncated: 4,651 more rows]

## Sheet: nearest_neighbor
ORF	GeneName	cer	par	hyc	hyp	hyb
YAL001C	TFC3	0.981627	0.978879	0.97689	0.961504	0.983511
YAL002W	VPS8	0.982934	0.986531	0.973886	0.979232	0.984238
YAL003W	EFB1	0.997631	0.991679	0.998341	0.998629	0.998899
YAL004W	YAL004W
YAL005C	SSA1	0.943014	0.882854	0.958485	0.7898	0.830018
YAL007C	ERP2	0.97136	0.918315	0.958339	0.9494	0.966473
YAL008W	FUN14	0.98282	0.982801	0.986637	0.994175	0.993135
YAL009W	SPO7	0.941241	0.97037	0.955523	0.918113	0.959674
YAL010C	MDM10	0.912193	0.914706	0.886727	0.739427	0.886118
YAL011W	SWC3	0.771019	0.928709	0.718147	0.656694	0.761174
YAL012W	CYS3	0.938068	0.957539	0.892442	0.971391	0.939189
YAL013W	DEP1	0.936811	0.972972	0.967739	0.969454	0.97558
YAL014C	SYN8	0.918037	0.963554	0.930748	0.94197	0.956215
YAL015C	NTG1	0.961536	0.929941	0.961922	0.916813	0.967897
YAL016W	TPD3	0.81044	0.936074	0.953919	0.899176	0.952736
YAL017W	PSK1	0.991686	0.98604	0.992426	0.98754	0.993382
YAL018C	LDS1	0.91626	0.87435	0.895681	0.668247	0.75103
YAL019W	FUN30	0.984918	0.944233	0.979959	0.985711	0.988974
YAL020C	ATS1
YAL021C	CCR4	0.846985	0.880797	0.726591	0.843937	0.808006
YAL022C	FUN26	0.938039	0.964039	0.916331	0.965362	0.957569
YAL023C	PMT2	0.992716	0.844166	0.987031	0.987957	0.991299
YAL024C	LTE1	0.835862	0.927394	0.696018	0.777446	0.774052
YAL025C	MAK16	0.993937	0.983197	0.995763	0.996101	0.997511
YAL026C	DRS2	0.908707	0.9581	0.786007	0.811198	0.796592
YAL027W	SAW1	0.910852	0.90972	0.9154	0.945491	0.957225
YAL028W	FRT2	0.989113	0.98522	0.978477	0.988444	0.989239
YAL029C	MYO4	0.947848	0.930379	0.964754	0.93862	0.962525
YAL030W	SNC1	0.982858	0.975063	0.993107	0.987818	0.99213
YAL031C	GIP4	0.961625	0.969544	0.979625	0.974202	0.984882
YAL032C	PRP45	0.92157	0.930379	0.911667	0.817703	0.721513
YAL033W	POP5	0.859635	0.926271	0.792586	0.961692	0.914337
YAL034C	FUN19	0.981683	0.985257	0.975444	0.990316	0.990136
YAL035W	FUN12	0.994411	0.986301	0.996957	0.994146	0.996515
YAL036C	RBG1	0.9947	0.987155	0.995146	0.99429	0.99662
YAL037W	YAL037W	0.91002	0.966046	0.695569	0.934087	0.913204
YAL038W	CDC19	0.991553	0.98678	0.996313	0.996496	0.997085
YAL039C	CYC3	0.981004	0.909545	0.847246	0.925069	0.903146
YAL040C	CLN3	0.869995	0.867193	0.954637	0.917744	0.95752
YAL041W	CDC24	0.830601	0.920497	0.906978	0.763455	0.83585
YAL042W	ERV46	0.976433	0.891722	0.953232	0.941238	0.954798
YAL043C	PTA1	0.894495	0.888128	0.77973	0.911662	0.867023
YAL044C	GCV3	0.978223	0.98647	0.995217	0.989154	0.991838
YAL045C	YAL045C
YAL046C	BOL3	0.808009	0.919475	0.899408	0.945013	0.939232
YAL047C	SPC72	0.806448	0.94022	0.890012	0.835852	0.910167
YAL048C	GEM1
YAL049C	AIM2	0.982858	0.941298	0.984374	0.974504	0.980899
YAL051W	OAF1	0.923917	0.939403	0.871665	0.869675	0.907536
YAL053W	FLC2	0.931316	0.950405	0.915574	0.885704	0.913304
YAL054C	ACS1	0.96996	0.974607	0.977475	0.982269	0.988073
YAL055W	PEX22	0.982528	0.954682	0.973675	0.954455	0.978389
YAL056W	GPB2	0.98569	0.984393	0.987371	0.990727	0.992735
YAL058W	CNE1	0.827488	0.93037	0.767101	0.830589	0.82801
YAL059W	ECM1	0.984945	0.984514	0.989416	0.989317	0.992024
YAL060W	BDH1	0.990527	0.992534	0.99398	0.995904	0.996716
YAL061W	BDH2	0.996488	0.993711	0.994611	0.997619	0.99743
YAL062W	GDH3	0.994393	0.989726	0.994324	0.993715	0.996135
YAL063C	FLO9
YAL064W	YAL064W
YAL065C	YAL065C
YAL066W	YAL066W
YAL067C	SEO1	0.99453	0.995435	0.995236	0.995363	0.997011
YAL068C	PAU8
YAL069W	YAL069W
YAR002W	NUP60	0.932011	0.880766	0.953146	0.900707	0.950649
YAR003W	SWD1	0.921307	0.820079	0.959862	0.944935	0.97446
YAR007C	RFA1	0.822667	0.941959	0.773319	0.841662	0.831348
YAR008W	SEN34	0.938824	0.917481	0.887296	0.841487	0.823906
YAR009C	YAR009C
YAR010C	YAR010C
YAR014C	BUD14	0.920194	0.922487	0.691354	0.716976	0.729973
YAR015W	ADE1	0.894058	0.965165	0.942148	0.959636	0.963692
YAR018C	KIN3	0.7751	0.954696	0.918224	0.893061	0.933655
YAR019C	CDC15	0.964704	0.933467	0.960496	0.943335	0.969456
YAR020C	PAU7
YAR023C	YAR023C
YAR027W	UIP3	0.988377	0.954768	0.971503	0.949739	0.977284
YAR028W	YAR028W
YAR029W	YAR029W
YAR030C	YAR030C
YAR031W	PRM9
YAR033W	MST28	0.852357	0.910108	0.808752	0.81701	0.872089
YAR035W	YAT1	0.946819	0.944034	0.980803	0.971973	0.986249
YAR042W	SWH1	0.821167	0.911337	0.861231	0.736793	0.842151
YAR047C	YAR047C
YAR050W	FLO1	0.850665	0.905113	0.957518	0.910338	0.664585
YAR053W	YAR053W
YAR060C	YAR060C
YAR061W	YAR061W
YAR062W	YAR062W
YAR064W	YAR064W
YAR066W	YAR066W
YAR068W	YAR068W
YAR069C	YAR069C
YAR070C	YAR070C
YAR071W	PHO11
YAR073W	IMD1
YAR075W	YAR075W
YBL001C	ECM15	0.980028	0.972586	0.991409	0.977277	0.991264
YBL002W	HTB2	0.966721	0.946543	0.962623	0.963374	0.969411
YBL003C	HTA2	0.966721	0.904243	0.962623	0.963374	0.969411
YBL004W	UTP20	0.982967	0.964667	0.990826	0.988225	0.992289
YBL005W	PDR3
YBL006C	LDB7	0.961524	0.941362	0.968931	0.967481	0.977132
YBL007C	SLA1	0.835917	0.969632	0.899731	0.914107	0.922605
YBL008W	HIR1	0.846548	0.928529	0.758491	0.740934	0.732731
YBL009W	ALK2	0.955923	0.931192	0.912908	0.794328	0.895356
YBL010C	LAA2	0.841732	0.964508	0.709319	0.923833	0.889165
YBL011W	SCT1	0.826828	0.87385	0.78235	0.767155	0.724107
YBL012C	YBL012C
YBL013W	FMT1
YBL014C	RRN6	0.912267	0.933705	0.863739	0.957845	0.949932
YBL015W	ACH1	0.984436	0.965109	0.983781	0.985509	0.988463
YBL016W	FUS3	0.969183	0.866476	0.951566	0.971169	0.977094
YBL017C	PEP1	0.9296	0.95013	0.942468	0.957868	0.964267
YBL018C	POP8	0.954472	0.802014	0.943172	0.842314	0.944149
YBL019W	APN2	0.98092	0.890038	0.962825	0.888267	0.955753
YBL020W	RFT1	0.873138	0.78598	0.667748	0.811651	0.802272
YBL021C	HAP3	0.874179	0.932053	0.904966	0.895644	0.925071
YBL022C	PIM1	0.887627	0.919625	0.851424	0.8886	0.864385
YBL023C	MCM2	0.881174	0.89418	0.689243	0.808682	0.744622
YBL024W	NCL1	0.991207	0.993272	0.995734	0.994735	0.996445
YBL025W	RRN10	0.851838	0.870925	0.920595	0.905949	0.945959
YBL026W	LSM2	0.852669	0.898109	0.858352	0.898306	0.917735
YBL027W	RPL19B
YBL028C	YBL028C	0.99206	0.976343	0.991756	0.991526	0.995068
YBL029W	YBL029W	0.983741	0.979365	0.977435	0.972006	0.985935
YBL030C	PET9	0.950356	0.83219	0.639188	0.746958	0.741359
YBL031W	SHE1	0.826852	0.773213	0.586377	0.542712	0.619668
YBL032W	HEK2	0.967669	0.877307	0.916517	0.928933	0.941029
YBL033C	RIB1	0.977926	0.959334	0.959076	0.971357	0.977889
YBL034C	STU1	0.857091	0.804292	0.702905	0.8192	0.824429
YBL035C	POL12	0.908747	0.901645	0.806295	0.82236	0.808256
YBL036C	YBL036C	0.959659	0.8313	0.904577	0.931599	0.937207
YBL037W	APL3	0.883294	0.939796	0.854897	0.94733	0.934319
YBL038W	MRPL16	0.94528	0.828008	0.902319	0.802429	0.867412
YBL039C	URA7	0.995002	0.995257	0.995756	0.996359	0.997567
YBL040C	ERD2	0.641746	0.875439	0.901141	0.845017	0.869872
YBL041W	PRE7	0.890748	0.943802	0.722731	0.928946	0.898107
YBL042C	FUI1	0.963507	0.983026	0.971626	0.99177	0.987174
YBL043W	ECM13	0.964972	0.990921	0.97155	0.987759	0.987527
YBL044W	YBL044W
YBL045C	COR1	0.978623	0.963901	0.984569	0.970828	0.982066
YBL046W	PSY4	0.899964	0.862722	0.718504	0.842134	0.807487
YBL047C	EDE1	0.970706	0.98322	0.98548	0.970753	0.980944
YBL048W	RRT1
YBL049W	MOH1	0.994973	0.987563	0.996341	0.991024	0.996047
YBL050W	SEC17	0.985283	0.983094	0.987059	0.98678	0.990606
YBL051C	PIN4	0.927555	0.764944	0.859622	0.713685	0.830059
YBL052C	SAS3	0.900505	0.931672	0.800978	0.849801	0.835122
YBL053W	YBL053W
YBL054W	TOD6	0.977063	0.979747	0.989026	0.98978	0.992876
YBL055C	YBL055C	0.871486	0.720166	0.885465	0.620925	0.777512
YBL056W	PTC3	0.904692	0.796356	0.928441	0.785796	0.908304
YBL057C	PTH2	0.912514	0.890645	0.870951	0.923516	0.91684
YBL058W	SHP1	0.852595	0.752842	0.930732	0.96299	0.965287
YBL059W	IAI11	0.944231	0.981181	0.951957	0.97333	0.977713
YBL060W	YEL1	0.947329	0.865455	0.909784	0.758977	0.901873
YBL061C	SKT5	0.930934	0.820321	0.941632	0.824311	0.927721
YBL062W	YBL062W
YBL063W	KIP1	0.806329	0.883536	0.830976	0.922863	0.919563
YBL064C	PRX1	0.996733	0.960199	0.995315	0.992098	0.995954
YBL065W	YBL065W
YBL066C	SEF1	0.881686	0.879245	0.88644	0.873859	0.921605
YBL067C	UBP13	0.848682	0.901009	0.785976	0.949043	0.923007
YBL068W	PRS4	0.979309	0.919348	0.986594	0.976003	0.984311
YBL069W	AST1	0.850069	0.859183	0.858859	0.841503	0.911204
YBL070C	YBL070C
YBL071C	YBL071C
YBL072C	RPS8A	0.998683	0.996963	0.997592	0.998727	0.998739
YBL073W	YBL073W
YBL074C	AAR2
YBL075C	SSA3	0.97568	0.953829	0.978125	0.983799	0.989408
YBL076C	ILS1	0.988895	0.979344	0.991671	0.992639	0.993505
YBL077W	YBL077W
YBL078C	ATG8	0.99322	0.988092	0.993705	0.993454	0.996486
YBL079W	NUP170	0.914194	0.846598	0.9309	0.907701	0.938917
YBL080C	PET112	0.97098	0.896333	0.960397	0.728417	0.935561
YBL081W	YBL081W	0.988624	0.953894	0.98899	0.984393	0.991317
YBL082C	ALG3	0.979517	0.917279	0.974736	0.96677	0.980433
YBL083C	YBL083C
YBL084C	CDC27	0.944942	0.952395	0.913741	0.920116	0.937329
YBL085W	BOI1	0.868093	0.847365	0.757148	0.804436	0.793697
YBL086C	YBL086C	0.954777	0.871622	0.954926	0.906309	0.957905
YBL087C	RPL23A
YBL088C	TEL1	0.878455	0.963666	0.944886	0.85651	0.933412
YBL089W	AVT5	0.966772	0.98127	0.960958	0.973609	0.98011
YBL090W	MRP21	0.839181	0.825943	0.718562	0.899235	0.872675
YBL091C	MAP2	0.931603	0.81707	0.886995	0.938463	0.910828
YBL092W	RPL32	0.999647	0.998769	0.99948	0.999609	0.99971
YBL093C	ROX3	0.914975	0.889324	0.79224	0.921442	0.925651
YBL094C	YBL094C
YBL095W	MRX3	0.988865	0.99026	0.985637	0.988955	0.992807
YBL096C	YBL096C
YBL097W	BRN1
YBL098W	BNA4
YBL099W	ATP1	0.964539	0.903057	0.94887	0.947724	0.95042
YBL100C	YBL100C
YBL101C	ECM21	0.985386	0.974075	0.982784	0.978579	0.987651
YBL102W	SFT2	0.991833	0.966502	0.987076	0.973716	0.986377
YBL103C	RTG3	0.956185	0.962701	0.968195	0.955483	0.97739
YBL104C	SEA4	0.909486	0.857967	0.864355	0.835778	0.87397
YBL105C	PKC1	0.826179	0.932464	0.897843	0.947138	0.95313
YBL106C	SRO77	0.944062	0.932632	0.919538	0.961633	0.964482
YBL107C	MIX23	0.820373	0.955745	0.884566	0.947092	0.945727
YBL108W	YBL108W
YBL109W	YBL109W
YBL111C	YBL111C
YBL112C	YBL112C
YBL113C	YBL113C
YBR001C	NTH2	0.992585	0.98671	0.992863	0.99561	0.996585
YBR002C	RER2	0.965241	0.914255	0.945228	0.96034	0.96295
YBR003W	COQ1	0.960916	0.699646	0.936237	0.942671	0.95862
YBR004C	GPI18	0.917186	0.874369	0.933723	0.873414	0.941679
YBR005W	RCR1	0.978745	0.88968	0.95341	0.971476	0.976845
YBR006W	UGA2	0.99394	0.989356	0.995339	0.992778	0.996099
YBR007C	DSF2	0.960329	0.703211	0.923991	0.84248	0.923946
YBR008C	FLR1	0.852296	0.965335	0.745726	0.780997	0.660151
YBR009C	HHF1	0.878539	0.958708	0.911862	0.959681	0.944323
YBR010W	HHT1	0.913045	0.958708	0.911862	0.959681	0.944323
YBR011C	IPP1	0.942619	0.919898	0.945808	0.965076	0.96255
YBR012C	YBR012C
YBR013C	YBR013C
YBR014C	GRX7	0.946947	0.967546	0.95773	0.900615	0.954326
YBR015C	MNN2	0.937636	0.940493	0.860971	0.954204	0.926969
YBR016W	YBR016W	0.951815	0.959794	0.966517	0.948839	0.96816
YBR017C	KAP104	0.963812	0.973279	0.952902	0.952337	0.9646
YBR018C	GAL7	0.97075	0.956861	0.97454	0.936132	0.971896
YBR019C	GAL10	0.928056	0.83177	0.938573	0.944933	0.95929
YBR020W	GAL1	0.959879	0.959078	0.925118	0.883611	0.93914
YBR021W	FUR4	0.945948	0.9017	0.969592	0.972328	0.983604
YBR022W	POA1	0.969363	0.97739	0.955404	0.955633	0.970711
YBR023C	CHS3	0.944828	0.914832	0.931173	0.858459	0.925391
YBR024W	SCO2	0.977622	0.867386	0.944543	0.931322	0.959708
YBR025C	OLA1	0.995762	0.992288	0.995735	0.996154	0.997006
YBR026C	ETR1	0.991945	0.987567	0.993689	0.994501	0.995692
YBR027C	YBR027C
YBR028C	YPK3	0.815038	0.86604	0.912473	0.738346	0.88478
YBR029C	CDS1	0.91733	0.900429	0.866051	0.948864	0.932583
YBR030W	RKM3	0.906129	0.872044	0.822631	0.907514	0.909958
YBR031W	RPL4A
YBR032W	YBR032W
YBR033W	EDS1	0.986174	0.962934	0.980659	0.95691	0.983106
YBR034C	HMT1	0.97954	0.986957	0.991453	0.987307	0.992885
YBR035C	PDX3	0.967412	0.99379	0.990212	0.990677	0.993926
YBR036C	CSG2	0.869802	0.982365	0.929862	0.96647	0.963597
YBR037C	SCO1	0.968674	0.887429	0.972293	0.848495	0.952914
YBR038W	CHS2	0.805789	0.876835	0.772726	0.889741	0.861721
YBR039W	ATP3	0.950356	0.963901	0.944842	0.940913	0.936392
YBR040W	FIG1
YBR041W	FAT1	0.833753	0.813704	0.819512	0.792729	0.828841
YBR042C	CST26	0.943731	0.867502	0.878003	0.915064	0.923182
YBR043C	QDR3	0.991378	0.994053	0.991031	0.991571	0.995159
YBR044C	TCM62	0.9096	0.958893	0.861004	0.96208	0.950936
YBR045C	GIP1
YBR046C	ZTA1	0.984844	0.9851	0.990531	0.989183	0.9939
YBR047W	FMP23	0.983551	0.991366	0.990621	0.988842	0.993077
YBR048W	RPS11B
YBR049C	REB1	0.78653	0.904313	0.850278	0.76595	0.876892
YBR050C	REG2	0.975429	0.960263	0.961382	0.973216	0.969972
YBR051W	YBR051W
YBR052C	RFS1	0.996195	0.988741	0.994881	0.995697	0.995695
YBR053C	YBR053C	0.994871	0.990092	0.996081	0.995143	0.997455
YBR054W	YRO2	0.945661	0.953136	0.947208	0.928002	0.944095
YBR055C	PRP6	0.792173	0.87129	0.816068	0.927759	0.720236
YBR056W	YBR056W	0.994278	0.970085	0.991502	0.990367	0.994488
YBR057C	MUM2	0.933526	0.951775	0.925234	0.964126	0.96999
YBR058C	UBP14	0.826787	0.956077	0.819558	0.952748	0.861204
YBR059C	AKL1	0.963395	0.900885	0.980198	0.972293	0.982816
YBR060C	ORC2	0.894782	0.847864	0.919656	0.803356	0.803469
YBR061C	TRM7	0.981168	0.992027	0.976213	0.98888	0.98978
YBR062C	YBR062C	0.956951	0.709098	0.976648	0.90932	0.971949
YBR063C	YBR063C	0.960866	0.961785	0.885328	0.917735	0.934055
YBR064W	YBR064W
YBR065C	ECM2
YBR066C	NRG2	0.975848	0.939341	0.977529	0.981165	0.987058
YBR067C	TIP1	0.97621	0.956443	0.947531	0.944818	0.963466
YBR068C	BAP2	0.962187	0.989235	0.981399	0.986281	0.99019
YBR069C	TAT1	0.993434	0.990289	0.988427	0.992531	0.990541
YBR070C	ALG14	0.848025	0.849995	0.827314	0.851478	0.878299
YBR071W	YBR071W	0.655183	0.851781	0.91532	0.940326	0.951105
YBR072W	HSP26	0.989804	0.884796	0.987238	0.985406	0.991809
YBR073W	RDH54	0.851742	0.882355	0.807349	0.80229	0.857069
YBR074W	PFF1	0.885802	0.882135	0.798123	0.828291	0.864052
YBR076W	ECM8	0.893561	0.955898	0.862228	0.924921	0.937111
YBR077C	SLM4	0.978239	0.952177	0.987821	0.977492	0.989812
YBR078W	ECM33	0.966896	0.890992	0.965185	0.94802	0.963978
YBR079C	RPG1	0.9943	0.993739	0.995231	0.995825	0.997157
YBR080C	SEC18	0.941602	0.697316	0.939517	0.894733	0.944402
YBR081C	SPT7	0.885133	0.937185	0.782642	0.855386	0.839057
YBR082C	UBC4	0.990072	0.988179	0.993185	0.99251	0.993913
YBR083W	TEC1	0.928211	0.766677	0.867023	0.754985	0.700632
YBR084W	MIS1	0.995082	0.991749	0.995941	0.995239	0.996815
YBR085W	AAC3	0.950268	0.932389	0.94549	0.970063	0.97349
YBR086C	IST2	0.870452	0.892474	0.856262	0.859708	0.861898
YBR087W	RFC5	0.939089	0.844579	0.897116	0.885726	0.919193
YBR088C	POL30	0.973834	0.902814	0.961845	0.9658	0.973993
YBR089W	YBR089W
YBR090C	YBR090C
YBR091C	TIM12	0.893669	0.969881	0.942543	0.919594	0.937047
YBR092C	PHO3	0.993434	0.978156	0.991232	0.983448	0.991996
YBR093C	PHO5	0.811751	0.96661	0.953244	0.975487	0.977832
YBR094W	PBY1	0.863494	0.828742	0.810869	0.785864	0.826873
YBR095C	RXT2	0.918849	0.956226	0.931658	0.956573	0.962619
YBR096W	YBR096W	0.884908	0.916943	0.900217	0.951195	0.935761
YBR097W	VPS15	0.962262	0.967029	0.970642	0.956334	0.979156
YBR098W	MMS4	0.943029	0.940195	0.930136	0.91028	0.954958
YBR099C	YBR099C
YBR101C	FES1	0.8632	0.957518	0.970672	0.9784	0.978672
YBR102C	EXO84	0.952741	0.94577	0.953607	0.917002	0.959812
YBR103W	SIF2	0.978737	0.974599	0.982819	0.900726	0.97201
YBR104W	YMC2	0.916673	0.910364	0.926777	0.882101	0.928785
YBR105C	VID24	0.986039	0.982376	0.95988	0.982403	0.977999
YBR106W	SND3	0.992741	0.979841	0.991669	0.991013	0.992636
YBR107C	IML3	0.949258	0.939722	0.942611	0.973385	0.977689
YBR108W	AIM3	0.966394	0.970878	0.979361	0.949694	0.979079
YBR109C	CMD1	0.904292	0.895631	0.959167	0.928045	0.950838
YBR110W	ALG1	0.843257	0.943682	0.903264	0.95943	0.950219
YBR111C	YSA1	0.960005	0.906839	0.981157	0.973	0.983982
YBR112C	CYC8	0.922715	0.935997	0.823792	0.891938	0.863913
YBR113W	YBR113W
YBR114W	RAD16	0.975477	0.971847	0.914295	0.974027	0.973639
YBR115C	LYS2	0.980223	0.996533	0.98535	0.989678	0.991614
YBR116C	YBR116C
YBR117C	TKL2	0.988834	0.973328	0.990705	0.993345	0.994123
YBR118W	TEF2	0.99035	0.96859	0.984032	0.985295	0.983492
YBR119W	MUD1	0.953031	0.717779	0.936161	0.696036	0.909078
YBR120C	CBP6	0.955784	0.8799	0.942918	0.821031	0.917145
YBR121C	GRS1	0.997035	0.990662	0.997313	0.995701	0.997446
YBR122C	MRPL36	0.947999	0.941411	0.879885	0.944525	0.898129
YBR123C	TFC1	0.894436	0.725113	0.905936	0.847577	0.921968
YBR124W	YBR124W
YBR125C	PTC4	0.774596	0.640125	0.700274	0.883748	0.845437
YBR126C	TPS1	0.997084	0.979095	0.995575	0.9957	0.997116
YBR127C	VMA2	0.927847	0.828874	0.930759	0.855014	0.914671
YBR128C	ATG14	0.993298	0.982792	0.990649	0.984454	0.991653
YBR129C	OPY1	0.956595	0.898251	0.919828	0.847978	0.92663
YBR130C	SHE3	0.965303	0.802236	0.919697	0.764728	0.889901
YBR131W	CCZ1	0.992259	0.934295	0.986403	0.899615	0.976915
YBR132C	AGP2	0.990341	0.973375	0.990462	0.992372	0.99321
YBR133C	HSL7	0.886919	0.933818	0.903585	0.960608	0.954841
YBR134W	YBR134W
YBR135W	CKS1	0.965065	0.761826	0.927787	0.784437	0.889441
YBR136W	MEC1	0.960062	0.955024	0.936018	0.910545	0.947583
YBR137W	YBR137W	0.98652	0.917488	0.991429	0.968419	0.98689
YBR138C	YBR138C	0.979558	0.97668	0.985055	0.977896	0.98907
YBR139W	ATG42	0.996301	0.992344	0.995037	0.994762	0.99619
YBR140C	IRA1	0.971488	0.964018	0.962076	0.953687	0.972076
YBR141C	BMT2	0.980467	0.97569	0.982365	0.986609	0.991195
YBR142W	MAK5	0.994841	0.991991	0.995368	0.994534	0.995968
YBR143C	SUP45	0.992253	0.991428	0.995734	0.991727	0.995213
YBR144C	YBR144C
YBR145W	ADH5	0.984745	0.858722	0.984781	0.924373	0.973003
YBR146W	MRPS9	0.778849	0.940091	0.864057	0.787296	0.84438
YBR147W	RTC2	0.995256	0.982577	0.994566	0.989656	0.993956
YBR148W	YSW1	0.982462	0.878173	0.973441	0.959459	0.978935
YBR149W	ARA1	0.995531	0.992162	0.996081	0.996131	0.99752
YBR150C	TBS1	0.970984	0.985979	0.976011	0.981469	0.985757
YBR151W	APD1	0.84166	0.933964	0.778648	0.727976	0.72649
YBR152W	SPP381
YBR153W	RIB7	0.910729	0.883606	0.681539	0.624138	0.74114
YBR154C	RPB5	0.99388	0.992717	0.996798	0.994661	0.997119
YBR155W	CNS1	0.98867	0.979946	0.989589	0.992954	0.994262
YBR156C	SLI15	0.830498	0.877497	0.729326	0.762267	0.838793
YBR157C	ICS2
YBR158W	AMN1	0.840487	0.605215	0.854104	0.726137	0.836486
YBR159W	IFA38	0.932284	0.75714	0.89001	0.826772	0.879203
YBR160W	CDC28	0.767248	0.943479	0.729838	0.727087	0.767052
YBR161W	CSH1	0.901648	0.839265	0.894874	0.913836	0.931665
YBR162C	TOS1	0.887051	0.949507	0.842919	0.828918	0.871066
YBR163W	EXO5	0.919868	0.867472	0.908052	0.946818	0.956804
YBR164C	ARL1
YBR165W	UBS1	0.908654	0.740747	0.92972	0.707485	0.902237
YBR166C	TYR1	0.88259	0.924886	0.739666	0.910074	0.85438
YBR167C	POP7	0.875698	0.806825	0.791754	0.769113	0.796751
YBR168W	PEX32	0.967941	0.978134	0.950784	0.970983	0.975728
YBR169C	SSE2	0.994371	0.982186	0.989215	0.994672	0.99464
YBR170C	NPL4	0.951508	0.63957	0.962775	0.946856	0.973124
YBR171W	SEC66	0.985408	0.916592	0.97265	0.911127	0.960566
YBR172C	SMY2	0.937494	0.903347	0.970569	0.961786	0.971562
YBR173C	UMP1	0.879676	0.86023	0.822744	0.906889	0.875325
YBR174C	YBR174C
YBR175W	SWD3	0.776632	0.649084	0.830768	0.819631	0.877851
YBR176W	ECM31	0.705306	0.829967	0.710885	0.819683	0.787335
YBR177C	EHT1	0.978505	0.990502	0.994243	0.993417	0.995918
YBR178W	YBR178W
YBR179C	FZO1	0.918364	0.814056	0.867851	0.846451	0.877999
YBR180W	DTR1	0.919702	0.972067	0.896548	0.958419	0.705634
YBR181C	RPS6B
YBR182C	SMP1	0.927699	0.947323	0.886402	0.92748	0.948958
YBR183W	YPC1	0.986514	0.968875	0.990563	0.984118	0.99262
YBR184W	YBR184W	0.899188	0.893053	0.932639	0.92721	0.956751
YBR185C	MBA1	0.791489	0.917269	0.640986	0.820905	0.777579
YBR186W	PCH2
YBR187W	GDT1	0.988071	0.971432	0.987036	0.98127	0.988813
YBR188C	NTC20	0.825292	0.773259	0.818635	0.754356	0.840697
YBR189W	RPS9B
YBR190W	YBR190W
YBR191W	RPL21A	0.999181	0.996672	0.999206	0.99888	0.999213
YBR192W	RIM2	0.951353	0.960807	0.969259	0.97703	0.980803
YBR193C	MED8	0.860592	0.899335	0.9098	0.915821	0.940965
YBR194W	AIM4	0.914838	0.836756	0.864747	0.891881	0.91153
YBR195C	MSI1	0.875268	0.843721	0.827293	0.823748	0.885426
YBR196C	PGI1	0.982563	0.981232	0.979731	0.978563	0.987335
YBR197C	YBR197C
YBR198C	TAF5	0.908707	0.72701	0.826179	0.82041	0.857378
YBR199W	KTR4	0.952821	0.96851	0.977866	0.985338	0.987452
YBR200W	BEM1	0.941717	0.881475	0.901757	0.870397	0.924161
YBR201W	DER1	0.956965	0.970852	0.950552	0.964547	0.973961
YBR202W	MCM7	0.887932	0.967674	0.946986	0.949891	0.963439
YBR203W	COS111	0.985229	0.854486	0.964789	0.912036	0.95998
YBR204C	LDH1	0.9878	0.966797	0.98394	0.976834	0.98781
YBR205W	KTR3	0.951894	0.970525	0.973135	0.980667	0.987644
YBR206W	YBR206W
YBR207W	FTH1	0.947831	0.954481	0.977755	0.907915	0.962976
YBR208C	DUR1,2	0.992975	0.99486	0.988314	0.996281	0.996157
YBR209W	YBR209W
YBR210W	ERV15	0.94492	0.906705	0.914685	0.700301	0.907244
YBR211C	AME1	0.967835	0.95736	0.964957	0.960987	0.974775
YBR212W	NGR1	0.979002	0.967998	0.983335	0.976546	0.986654
YBR213W	MET8	0.970182	0.990619	0.990615	0.992814	0.995504
YBR214W	SDS24	0.993426	0.979052	0.995457	0.992527	0.99642
YBR215W	HPC2	0.840239	0.954173	0.836503	0.799484	0.864942
YBR216C	YBP1	0.977002	0.94813	0.967988	0.944752	0.974957
YBR217W	ATG12	0.968779	0.915818	0.957019	0.906479	0.963004
YBR218C	PYC2	0.952293	0.946837	0.974955	0.89993	0.956211
YBR219C	YBR219C
YBR220C	YBR220C	0.923608	0.741058	0.872523	0.859879	0.806865
YBR221C	PDB1	0.852997	0.948777	0.956403	0.955328	0.954582
YBR222C	PCS60	0.949069	0.978453	0.961598	0.983711	0.98152
YBR223C	TDP1	0.97182	0.945009	0.98115	0.979949	0.986589
YBR224W	YBR224W
YBR225W	YBR225W	0.922874	0.951381	0.958907	0.966904	0.975984
YBR226C	YBR226C
YBR227C	MCX1	0.862713	0.968635	0.774312	0.919858	0.883907
YBR228W	SLX1	0.963705	0.977564	0.958085	0.966161	0.976022
YBR229C	ROT2	0.807531	0.574841	0.919756	0.811185	0.918354
YBR230C	OM14	0.994032	0.969191	0.99389	0.99181	0.994812
YBR231C	SWC5	0.951312	0.952071	0.914134	0.96377	0.962504
YBR232C	YBR232C
YBR233W	PBP2	0.866975	0.930912	0.894327	0.919279	0.928056
YBR234C	ARC40	0.974533	0.954791	0.979473	0.985664	0.987933
YBR235W	VHC1	0.989635	0.991565	0.984083	0.9858	0.990852
YBR236C	ABD1	0.958214	0.937391	0.910073	0.941032	0.947949
YBR237W	PRP5	0.956631	0.827128	0.925584	0.64321	0.887923
YBR238C	YBR238C	0.934032	0.958022	0.975553	0.975367	0.986016
YBR239C	ERT1	0.847306	0.829632	0.704412	0.731233	0.784492
YBR240C	THI2
YBR241C	YBR241C	0.993593	0.984265	0.995289	0.992771	0.996309
YBR242W	YBR242W	0.967504	0.942953	0.978303	0.939584	0.975612
YBR243C	ALG7	0.901928	0.87094	0.722744	0.792383	0.768685
YBR244W	GPX2	0.957073	0.985356	0.926357	0.984099	0.976032
YBR245C	ISW1	0.907145	0.873425	0.897248	0.884617	0.925643
YBR246W	RRT2	0.908385	0.94047	0.897435	0.916264	0.933378
YBR247C	ENP1	0.99442	0.993093	0.995756	0.995446	0.997358
YBR248C	HIS7	0.946043	0.966796	0.944119	0.934127	0.955566
YBR249C	ARO4	0.943991	0.853261	0.973566	0.931308	0.971754
YBR250W	SPO23
YBR251W	MRPS5	0.773145	0.898262	0.775109	0.746741	0.780834
YBR252W	DUT1	0.981789	0.986384	0.987493	0.990748	0.988343
YBR253W	SRB6	0.961727	0.969267	0.943936	0.926319	0.947867
YBR254C	TRS20	0.762122	0.957045	0.695012	0.937431	0.890732
YBR255W	MTC4	0.979815	0.950615	0.964598	0.973186	0.981284
YBR256C	RIB5	0.98875	0.977811	0.986997	0.988187	0.9906
YBR257W	POP4	0.857411	0.815665	0.826761	0.920062	0.911345
YBR258C	SHG1
YBR259W	YBR259W	0.901175	0.79722	0.885804	0.893451	0.92885
YBR260C	RGD1	0.898717	0.929583	0.844174	0.89258	0.900102
YBR261C	TAE1	0.966215	0.982257	0.977288	0.991369	0.990654
YBR262C	MIC12	0.948736	0.968494	0.944514	0.837664	0.84763
YBR263W	SHM1	0.992924	0.985396	0.98593	0.99157	0.994282
YBR264C	YPT10	0.952089	0.714615	0.963055	0.782992	0.918658
YBR265W	TSC10	0.912091	0.948001	0.899449	0.868783	0.857144
YBR266C	SLM6
YBR267W	REI1	0.994484	0.991449	0.996598	0.995371	0.997381
YBR268W	MRPL37	0.810759	0.894296	0.910353	0.912269	0.880388
YBR269C	SDH8	0.992799	0.992531	0.99381	0.996037	0.996864
YBR270C	BIT2	0.983775	0.859517	0.960437	0.842131	0.955803
YBR271W	EFM2	0.979358	0.959059	0.987858	0.964798	0.985887
YBR272C	HSM3	0.982308	0.900293	0.981009	0.959745	0.981736
YBR273C	UBX7	0.869417	0.82487	0.949607	0.948893	0.966594
YBR274W	CHK1	0.958951	0.766666	0.933611	0.838304	0.928746
YBR275C	RIF1	0.875821	0.908638	0.618485	0.736861	0.745034
YBR276C	PPS1	0.879913	0.904393	0.795009	0.766313	0.811809
YBR277C	YBR277C
YBR278W	DPB3	0.977742	0.947946	0.976412	0.965875	0.978403
YBR279W	PAF1	0.815693	0.698585	0.789166	0.626615	0.748641
YBR280C	SAF1	0.987403	0.989603	0.989491	0.996295	0.995534
YBR281C	DUG2	0.902786	0.971871	0.898223	0.950054	0.949112
YBR282W	MRPL27	0.773188	0.961514	0.833857	0.922431	0.833624
YBR283C	SSH1	0.990177	0.950366	0.985743	0.981378	0.985192
YBR284W	YBR284W	0.967863	0.898408	0.92489	0.965488	0.9684
YBR285W	YBR285W	0.996734	0.990159	0.994872	0.99588	0.997342
YBR286W	APE3	0.898698	0.93501	0.898602	0.978953	0.960512
YBR287W	YBR287W	0.983527	0.986188	0.987385	0.990442	0.990701
YBR288C	APM3	0.883418	0.872401	0.821512	0.858966	0.856014
YBR289W	SNF5	0.844269	0.94261	0.80863	0.902906	0.895902
YBR290W	BSD2	0.943031	0.948758	0.957749	0.926811	0.957865
YBR291C	CTP1	0.972228	0.994355	0.976214	0.99278	0.987697
YBR292C	YBR292C
YBR293W	VBA2	0.986128	0.993286	0.985635	0.994074	0.994924
YBR294W	SUL1	0.992051	0.995658	0.994377	0.997591	0.996464
YBR295W	PCA1	0.967915	0.981841	0.957676	0.977749	0.979305
YBR296C	PHO89	0.964555	0.954613	0.955193	0.945103	0.9708
YBR297W	MAL33
YBR298C	MAL31
YBR299W	MAL32
YBR300C	YBR300C
YBR301W	PAU24
YBR302C	COS2
YCL001W	RER1	0.818861	0.894384	0.926406	0.909632	0.929107
YCL002C	YCL002C	0.862545	0.812412	0.882915	0.801485	0.885995
YCL004W	PGS1
YCL005W	LDB16	0.810769	0.819062	0.737058	0.742476	0.748846
YCL007C	YCL007C
YCL008C	STP22	0.976048	0.813353	0.966917	0.938376	0.965189
YCL009C	ILV6	0.975493	0.889931	0.983562	0.846554	0.954096
YCL010C	SGF29	0.907116	0.892272	0.917177	0.915028	0.943566
YCL011C	GBP2	0.889884	0.933745	0.95321	0.932772	0.948594
YCL014W	BUD3	0.861723	0.87904	0.746281	0.830174	0.801531
YCL016C	DCC1	0.954202	0.962606	0.920217	0.974486	0.969749
YCL017C	NFS1	0.825986	0.954582	0.839332	0.955663	0.948368
YCL018W	LEU2	0.693649	0.940388	0.893313	0.910754	0.921634
YCL019W	YCL019W
YCL020W	YCL020W
YCL022C	YCL022C
YCL023C	YCL023C
YCL024W	KCC4	0.806935	0.868696	0.775217	0.692209	0.769442
YCL025C	AGP1	0.993416	0.991902	0.99404	0.99473	0.995903
YCL027W	FUS1	0.969045	0.928457	0.972482	0.851779	0.955064
YCL028W	RNQ1	0.91579	0.887827	0.786917	0.866706	0.782227
YCL029C	BIK1	0.780021	0.754465	0.845	0.7603	0.824752
YCL030C	HIS4	0.978421	0.991372	0.9814	0.976681	0.983836
YCL031C	RRP7	0.958496	0.914667	0.95077	0.976424	0.971744
YCL032W	STE50	0.955363	0.95186	0.952273	0.961621	0.970126
YCL033C	MXR2	0.987779	0.981269	0.995184	0.992704	0.995563
YCL034W	LSB5	0.989898	0.968416	0.992779	0.984924	0.99052
YCL035C	GRX1	0.994954	0.980372	0.995184	0.992147	0.995551
YCL036W	GFD2	0.925986	0.981972	0.982165	0.976073	0.98457
YCL037C	SRO9	0.991304	0.984	0.992498	0.990805	0.994374
YCL038C	ATG22	0.986855	0.984975	0.989116	0.99281	0.994758
YCL039W	GID7	0.989177	0.977491	0.988126	0.98339	0.991327
YCL040W	GLK1	0.997084	0.967264	0.996562	0.993318	0.997023
YCL041C	YCL041C
YCL042W	YCL042W
YCL043C	PDI1	0.97272	0.934745	0.915285	0.974315	0.957469
YCL044C	MGR1	0.778833	0.918306	0.567526	0.902541	0.847191
YCL045C	EMC1	0.973427	0.89861	0.960703	0.936507	0.96252
YCL046W	YCL046W
YCL047C	POF1	0.866435	0.923217	0.879996	0.82886	0.903885
YCL048W	SPS22
YCL049C	YCL049C	0.946916	0.828484	0.936005	0.945632	0.962191
YCL050C	APA1	0.990358	0.986074	0.992291	0.99439	0.99476
YCL051W	LRE1	0.936339	0.89456	0.937438	0.862513	0.931048
YCL052C	PBN1	0.986737	0.951967	0.978788	0.969997	0.984094
YCL054W	SPB1	0.995603	0.992437	0.995421	0.995627	0.997012
YCL055W	KAR4	0.63643	0.650489	0.698895	0.794117	0.8123
YCL056C	PEX34	0.953193	0.945705	0.960966	0.91807	0.952736
YCL057W	PRD1	0.86315	0.924184	0.597389	0.871842	0.77999
YCL058C	FYV5
YCL059C	KRR1	0.993554	0.990837	0.996102	0.994583	0.997347
YCL061C	MRC1	0.806954	0.844905	0.786161	0.669898	0.794225
YCL063W	VAC17	0.925069	0.895632	0.742102	0.641352	0.793049
YCL064C	CHA1	0.98255	0.964328	0.947531	0.932598	0.944422
YCL065W	YCL065W
YCL066W	HMLALPHA1
YCL067C	HMLALPHA2
YCL068C	YCL068C
YCL069W	VBA3
YCL074W	YCL074W
YCL075W	YCL075W
YCL076W	YCL076W
YCR001W	YCR001W
YCR002C	CDC10	0.946942	0.916956	0.966687	0.944786	0.970918
YCR003W	MRPL32	0.871633	0.859929	0.780921	0.93982	0.921824
YCR004C	YCP4	0.991651	0.977195	0.994511	0.993029	0.996131
YCR005C	CIT2	0.990637	0.992144	0.992237	0.993408	0.995236
YCR006C	YCR006C
YCR007C	YCR007C
YCR008W	SAT4	0.834181	0.893502	0.757991	0.822226	0.728779
YCR009C	RVS161	0.982109	0.94457	0.983124	0.961964	0.980814
YCR010C	ADY2	0.985568	0.974315	0.978691	0.978773	0.983975
YCR011C	ADP1	0.994392	0.984812	0.992526	0.991014	0.99456
YCR012W	PGK1	0.987249	0.979209	0.979723	0.982763	0.98458
YCR013C	YCR013C
YCR014C	POL4	0.795097	0.81659	0.692673	0.778591	0.812197
YCR015C	CTO1	0.979796	0.908515	0.973962	0.949888	0.978191
YCR016W	YCR016W	0.991016	0.974339	0.988489	0.991041	0.993867
YCR017C	CWH43	0.881491	0.914559	0.828176	0.602463	0.758676
YCR018C	SRD1
YCR019W	MAK32	0.95231	0.937607	0.923439	0.696889	0.877094
YCR020C	PET18	0.987866	0.909596	0.975881	0.973664	0.983779
YCR021C	HSP30	0.965098	0.945228	0.980427	0.971531	0.980623
YCR022C	YCR022C
YCR023C	YCR023C	0.974811	0.979857	0.976564	0.980135	0.98665
YCR024C	SLM5	0.962703	0.670269	0.907286	0.831488	0.914014
YCR025C	YCR025C
YCR026C	NPP1	0.965796	0.894583	0.959932	0.925312	0.95577
YCR027C	RHB1	0.848347	0.800581	0.859339	0.643829	0.827392
YCR028C	FEN2	0.8329	0.84633	0.84144	0.639504	0.791687
YCR030C	SYP1	0.971497	0.934918	0.978888	0.977285	0.98298
YCR031C	RPS14A
YCR032W	BPH1	0.971983	0.962494	0.964302	0.975001	0.982379
YCR033W	SNT1	0.910495	0.945831	0.939652	0.873863	0.94104
YCR034W	ELO2	0.991256	0.991749	0.993608	0.993313	0.995483
YCR035C	RRP43	0.921831	0.886513	0.947785	0.916894	0.958523
YCR036W	RBK1	0.948029	0.921413	0.909504	0.953956	0.963823
YCR037C	PHO87	0.930292	0.858773	0.821764	0.902411	0.887117
YCR038C	BUD5	0.976004	0.968633	0.969426	0.954607	0.978296
YCR039C	MATALPHA2
YCR040W	MATALPHA1
YCR041W	YCR041W
YCR042C	TAF2	0.721842	0.836352	0.852236	0.65109	0.832008
YCR043C	YCR043C	0.916005	0.900373	0.90875	0.950777	0.954806
YCR044C	PER1	0.77795	0.823796	0.81616	0.89154	0.869863
YCR045C	RRT12
YCR046C	IMG1	0.880745	0.938575	0.89066	0.890581	0.924377
YCR047C	BUD23	0.978361	0.970292	0.983832	0.987296	0.990906
YCR048W	ARE1	0.922299	0.866783	0.782052	0.939441	0.912125
YCR049C	YCR049C
YCR050C	YCR050C
YCR051W	YCR051W	0.988693	0.979625	0.993359	0.987622	0.99448
YCR052W	RSC6	0.925556	0.818244	0.932621	0.790904	0.90528
YCR053W	THR4	0.98839	0.977363	0.991671	0.983335	0.992531
YCR054C	CTR86	0.90529	0.893937	0.931054	0.910266	0.949512
YCR057C	PWP2	0.993863	0.992086	0.996295	0.995466	0.997145
YCR059C	YIH1	0.972062	0.968746	0.980786	0.975729	0.985804
YCR060W	TAH1	0.937844	0.910545	0.898739	0.913283	0.924132
YCR061W	YCR061W	0.90124	0.806216	0.930159	0.965481	0.969708
YCR063W	BUD31
YCR064C	YCR064C
YCR065W	HCM1	0.788124	0.88395	0.846363	0.766173	0.85703
YCR066W	RAD18	0.869602	0.818074	0.758145	0.681169	0.80034
YCR067C	SED4	0.937456	0.704746	0.852255	0.875986	0.877414
YCR068W	ATG15
YCR069W	CPR4	0.95655	0.972208	0.979942	0.983448	0.987529
YCR071C	IMG2	0.80507	0.851154	0.848258	0.771065	0.819421
YCR072C	RSA4	0.982381	0.991343	0.989375	0.994374	0.994239
YCR073C	SSK22	0.889619	0.781597	0.744684	0.813359	0.752401
YCR075C	ERS1	0.987393	0.968651	0.987985	0.988407	0.991539
YCR076C	FUB1	0.990797	0.940155	0.984858	0.982193	0.990744
YCR077C	PAT1	0.884745	0.906203	0.633117	0.709783	0.64159
YCR079W	PTC6	0.981662	0.971511	0.983951	0.972817	0.987325
YCR081W	SRB8
YCR082W	AHC2	0.820548	0.661449	0.815806	0.878225	0.834564
YCR083W	TRX3	0.965564	0.986524	0.944034	0.988916	0.984168
YCR084C	TUP1	0.922375	0.779546	0.914006	0.869039	0.914765
YCR085W	YCR085W
YCR086W	CSM1	0.91558	0.883256	0.943655	0.933754	0.964078
YCR087W	YCR087W
YCR088W	ABP1	0.961379	0.946195	0.986189	0.933242	0.975818
YCR089W	FIG2	0.853997	0.967945	0.89324	0.955942	0.956815
YCR090C	YCR090C	0.839276	0.871897	0.906326	0.901213	0.81374
YCR091W	KIN82	0.9884	0.935717	0.982584	0.962042	0.984378
YCR092C	MSH3	0.83732	0.899283	0.727584	0.867612	0.854678
YCR093W	CDC39	0.92479	0.887927	0.869972	0.900798	0.922621
YCR094W	CDC50	0.738723	0.715905	0.655001	0.65856	0.625295
YCR095C	OCA4	0.72846	0.760808	0.799611	0.823995	0.851664
YCR096C	HMRA2
YCR098C	GIT1	0.908037	0.966365	0.955193	0.975487	0.977832
YCR099C	YCR099C
YCR100C	EMA35
YCR101C	YCR101C
YCR102C	YCR102C
YCR104W	PAU3
YCR105W	ADH7
YCR106W	RDS1
YCR107W	AAD3	0.950453	0.873393	0.915418	0.959806	0.961193
YDL001W	RMD1	0.923548	0.895473	0.812602	0.947029	0.941146
YDL002C	NHP10	0.857754	0.769618	0.832476	0.846268	0.893822
YDL003W	MCD1	0.904486	0.82953	0.810326	0.864638	0.84161
YDL004W	ATP16	0.971542	0.922923	0.968391	0.973778	0.980231
YDL005C	MED2	0.925025	0.899488	0.809194	0.745367	0.817366
YDL006W	PTC1	0.945934	0.811965	0.9465	0.804929	0.899932
YDL007W	RPT2	0.849661	0.867809	0.787076	0.891763	0.863449
YDL008W	APC11
YDL009C	YDL009C
YDL010W	GRX6	0.982605	0.980617	0.960251	0.974587	0.979791
YDL011C	YDL011C
YDL012C	YDL012C	0.968218	0.826148	0.974249	0.868465	0.949541
YDL013W	SLX5	0.937882	0.957376	0.927597	0.957391	0.965016
YDL014W	NOP1	0.998011	0.997165	0.998261	0.998779	0.999022
YDL015C	TSC13	0.888319	0.921905	0.910032	0.912913	0.925866
YDL016C	YDL016C
YDL017W	CDC7	0.67845	0.732945	0.616403	0.889717	0.797548
YDL018C	ERP3	0.916002	0.824361	0.953201	0.769065	0.915787
YDL019C	OSH2	0.97297	0.973861	0.97652	0.982881	0.984177
YDL020C	RPN4	0.898119	0.766089	0.901025	0.837516	0.892842
YDL021W	GPM2	0.995334	0.968309	0.99433	0.990896	0.99523
YDL022W	GPD1	0.992627	0.876717	0.987711	0.993293	0.993999
YDL023C	YDL023C
YDL024C	DIA3	0.988875	0.970952	0.978116	0.99356	0.991976
YDL025C	RTK1	0.982705	0.974848	0.982906	0.984126	0.98868
YDL026W	YDL026W
YDL027C	MRX9	0.993277	0.984089	0.993044	0.989736	0.994573
YDL028C	MPS1	0.944341	0.903806	0.94772	0.904598	0.956248
YDL029W	ARP2	0.903165	0.970235	0.953891	0.976258	0.976645
YDL030W	PRP9	0.895147	0.915833	0.78121	0.932479	0.913809
YDL031W	DBP10	0.992395	0.986792	0.991478	0.993149	0.995416
YDL032W	YDL032W
YDL033C	SLM3
YDL034W	YDL034W
YDL035C	GPR1	0.958323	0.927543	0.943417	0.77506	0.884574
YDL036C	PUS9	0.948943	0.942723	0.96026	0.862317	0.822612
YDL037C	BSC1
YDL039C	PRM7
YDL040C	NAT1	0.974272	0.938801	0.969412	0.976639	0.981595
YDL041W	YDL041W
YDL042C	SIR2	0.922003	0.767744	0.913755	0.875419	0.924126
YDL043C	PRP11	0.613088	0.744264	0.879803	0.828015	0.627325
YDL044C	MTF2	0.892421	0.729041	0.729252	0.612535	0.705703
YDL045C	FAD1	0.981804	0.90114	0.975032	0.938558	0.978165
YDL046W	NPC2	0.981244	0.987722	0.981843	0.992611	0.99187
YDL047W	SIT4	0.867962	0.831027	0.724255	0.890886	0.841807
YDL048C	STP4	0.978484	0.94096	0.930767	0.956481	0.967588
YDL049C	KNH1	0.978635	0.982784	0.975736	0.98273	0.987087
YDL050C	YDL050C
YDL051W	LHP1	0.996367	0.994754	0.995883	0.997157	0.997952
YDL052C	SLC1	0.941508	0.871368	0.898358	0.915112	0.925035
YDL053C	PBP4	0.946224	0.842353	0.887488	0.760821	0.843679
YDL054C	MCH1	0.973167	0.975713	0.977163	0.977876	0.985653
YDL055C	PSA1	0.941273	0.843994	0.953043	0.965868	0.964581
YDL056W	MBP1	0.920866	0.82784	0.814147	0.680582	0.78068
YDL057W	YDL057W	0.991598	0.973185	0.98823	0.975942	0.988992
YDL058W	USO1	0.900743	0.939498	0.800015	0.775355	0.833408
YDL059C	RAD59	0.992415	0.992799	0.993028	0.992402	0.995917
YDL060W	TSR1	0.994858	0.996988	0.995368	0.99655	0.996931
YDL061C	RPS29B	0.998278	0.997125	0.99896	0.998575	0.999232
YDL062W	YDL062W
YDL063C	SYO1	0.987891	0.994839	0.993439	0.996112	0.997021
YDL064W	UBC9	0.945787	0.903705	0.905655	0.907442	0.925752
YDL065C	PEX19	0.934961	0.939744	0.897498	0.716041	0.868601
YDL066W	IDP1	0.939409	0.959895	0.959371	0.964926	0.969362
YDL067C	COX9	0.985372	0.974176	0.985058	0.975071	0.986949
YDL068W	YDL068W
YDL069C	CBS1	0.920752	0.932301	0.943551	0.92147	0.96051
YDL070W	BDF2	0.945518	0.982301	0.906826	0.919877	0.921265
YDL071C	YDL071C
YDL072C	YET3	0.957882	0.770652	0.986394	0.978094	0.985568
YDL073W	AHK1	0.889717	0.891774	0.772577	0.783184	0.803642
YDL074C	BRE1	0.883101	0.939605	0.839631	0.79697	0.875523
YDL075W	RPL31A	0.999421	0.998474	0.999558	0.999546	0.999706
YDL076C	RXT3	0.97096	0.959916	0.966517	0.976153	0.981674
YDL077C	VAM6	0.854831	0.885036	0.881681	0.861142	0.912939
YDL078C	MDH3	0.98745	0.993162	0.985911	0.996037	0.993903
YDL079C	MRK1	0.985296	0.940839	0.976144	0.983413	0.98443
YDL080C	THI3	0.923368	0.917134	0.956277	0.86952	0.952236
YDL081C	RPP1A	0.996374	0.996738	0.997817	0.99888	0.998892
YDL082W	RPL13A	0.999126	0.997568	0.999035	0.999058	0.999262
YDL083C	RPS16B	0.99958	0.998224	0.999372	0.999487	0.999644
YDL084W	SUB2	0.987682	0.954166	0.970911	0.980713	0.980515
YDL085W	NDE2	0.996059	0.978661	0.994965	0.99275	0.995324
YDL086W	YDL086W	0.98274	0.90137	0.973953	0.962826	0.97244
YDL087C	LUC7
YDL088C	ASM4	0.903709	0.845346	0.665282	0.756302	0.786968
YDL089W	NUR1	0.924793	0.92896	0.930138	0.955129	0.96263
YDL090C	RAM1	0.96663	0.923613	0.953818	0.938914	0.966001
YDL091C	UBX3	0.990714	0.981247	0.985522	0.980077	0.989155
YDL092W	SRP14	0.906434	0.938699	0.953631	0.950643	0.955703
YDL093W	PMT5	0.876948	0.875884	0.720793	0.920731	0.879658
YDL094C	YDL094C
YDL095W	PMT1	0.982272	0.896362	0.965443	0.986106	0.983769
YDL096C	OPI6
YDL097C	RPN6	0.865155	0.675102	0.941481	0.917323	0.943117
YDL098C	SNU23	0.796021	0.773327	0.632876	0.61518	0.698147
YDL099W	BUG1	0.84476	0.821253	0.753074	0.715513	0.738479
YDL100C	GET3	0.968663	0.947295	0.971675	0.949032	0.970696
YDL101C	DUN1	0.793187	0.81258	0.937784	0.807418	0.910171
YDL102W	POL3	0.932963	0.70695	0.853206	0.917565	0.926924
YDL103C	QRI1	0.861695	0.891061	0.876447	0.830992	0.741248
YDL104C	QRI7	0.960261	0.983283	0.952963	0.974647	0.981581
YDL105W	NSE4	0.807366	0.966208	0.742382	0.861231	0.868807
YDL106C	PHO2	0.857579	0.961826	0.932761	0.952688	0.963514
YDL107W	MSS2	0.964141	0.936012	0.957023	0.93875	0.966448
YDL108W	KIN28	0.885762	0.721454	0.892213	0.873839	0.92077
YDL109C	YDL109C
YDL110C	TMA17	0.996005	0.993332	0.995962	0.997464	0.99723
YDL111C	RRP42	0.96604	0.944338	0.971278	0.982173	0.983361
YDL112W	TRM3	0.99272	0.973441	0.991537	0.989598	0.994407
YDL113C	ATG20	0.98752	0.984221	0.985365	0.990464	0.991299
YDL114W	YDL114W	0.977264	0.96149	0.952036	0.941788	0.964234
YDL115C	IWR1	0.980886	0.957629	0.981917	0.952416	0.982287
YDL116W	NUP84	0.85036	0.728912	0.774732	0.79229	0.821324
YDL117W	CYK3	0.861321	0.892875	0.872963	0.882312	0.904237
YDL118W	YDL118W
YDL119C	HEM25	0.909453	0.870633	0.866633	0.967164	0.964344
YDL120W	YFH1
YDL121C	EXP1	0.993075	0.962511	0.989942	0.983803	0.99055
YDL122W	UBP1	0.968584	0.944192	0.987898	0.971786	0.980663
YDL123W	SNA4	0.960826	0.886536	0.972841	0.931146	0.973901
YDL124W	YDL124W	0.992077	0.880453	0.992588	0.990374	0.992729
YDL125C	HNT1	0.796256	0.940297	0.787326	0.976494	0.953911
YDL126C	CDC48	0.843156	0.929018	0.91239	0.872626	0.891646
YDL127W	PCL2	0.891639	0.86083	0.773971	0.873067	0.897419
YDL128W	VCX1	0.925843	0.941313	0.92356	0.872623	0.919937
YDL129W	YDL129W	0.935919	0.762436	0.926749	0.93182	0.954474
YDL130W	RPP1B	0.999181	0.998391	0.998703	0.999556	0.999452
YDL131W	LYS21	0.980223	0.997076	0.967408	0.988323	0.984212
YDL132W	CDC53	0.91587	0.902487	0.939909	0.887625	0.948058
YDL133W	SRF1	0.947984	0.912036	0.926381	0.959898	0.967509
YDL134C	PPH21	0.97922	0.846414	0.952569	0.873758	0.947445
YDL135C	RDI1	0.78996	0.920387	0.821737	0.880594	0.87638
YDL136W	RPL35B
YDL137W	ARF2	0.982088	0.986594	0.98774	0.989154	0.99187
YDL138W	RGT2	0.966551	0.975271	0.976362	0.935858	0.972619
YDL139C	SCM3	0.964762	0.955837	0.954532	0.943571	0.96859
YDL140C	RPO21	0.983782	0.923122	0.983128	0.982937	0.989983
YDL141W	BPL1	0.871551	0.90673	0.806481	0.772014	0.835785
YDL142C	CRD1	0.984273	0.915865	0.984754	0.923825	0.977017
YDL143W	CCT4	0.991833	0.986406	0.994602	0.993002	0.994839
YDL144C	YDL144C	0.966671	0.952307	0.972484	0.956831	0.977597
YDL145C	COP1	0.986916	0.907344	0.966596	0.839515	0.936141
YDL146W	LDB17	0.94648	0.777844	0.954279	0.96452	0.973674
YDL147W	RPN5	0.926926	0.743219	0.923769	0.931715	0.958122
YDL148C	NOP14	0.995556	0.991507	0.995134	0.994242	0.99688
YDL149W	ATG9	0.992483	0.984815	0.992319	0.990843	0.99498
YDL150W	RPC53	0.992603	0.982524	0.995557	0.991697	0.99539
YDL151C	BUD30
YDL152W	YDL152W
YDL153C	SAS10	0.990817	0.993199	0.993087	0.994	0.996494
YDL154W	MSH5	0.937979	0.883515	0.917511	0.915315	0.947932
YDL155W	CLB3	0.796412	0.942122	0.627414	0.923338	0.856186
YDL156W	CMR1
YDL157C	YDL157C	0.983696	0.91468	0.985552	0.892725	0.969366
YDL158C	YDL158C
YDL159W	STE7	0.932856	0.971248	0.931368	0.961701	0.96738
YDL160C	DHH1
YDL161W	ENT1	0.808556	0.896788	0.764637	0.820315	0.825649
YDL162C	YDL162C
YDL163W	YDL163W
YDL164C	CDC9	0.910226	0.766061	0.859617	0.828449	0.884896
YDL165W	CDC36	0.767226	0.948521	0.853042	0.967011	0.947984
YDL166C	FAP7	0.979468	0.967812	0.982761	0.984921	0.982365
YDL167C	NRP1	0.991397	0.988558	0.99123	0.99034	0.994353
YDL168W	SFA1	0.975574	0.968315	0.966044	0.790066	0.924132
YDL169C	UGX2	0.995492	0.993332	0.996891	0.997011	0.997722
YDL170W	UGA3	0.989411	0.989912	0.98736	0.989343	0.993451
YDL171C	GLT1	0.951673	0.99105	0.939456	0.959221	0.958333
YDL172C	YDL172C
YDL173W	PAR32	0.912443	0.972929	0.820567	0.948732	0.93783
YDL174C	DLD1	0.987818	0.956874	0.987771	0.989768	0.992139
YDL175C	AIR2	0.902803	0.958079	0.890343	0.956904	0.955448
YDL176W	YDL176W	0.979053	0.979175	0.973722	0.976601	0.985563
YDL177C	YDL177C	0.954363	0.933763	0.823108	0.891586	0.895247
YDL178W	DLD2	0.877696	0.887329	0.84899	0.835164	0.833023
YDL179W	PCL9	0.962017	0.96572	0.939151	0.94357	0.960589
YDL180W	YDL180W	0.97475	0.912036	0.975039	0.905342	0.97067
YDL181W	INH1	0.986685	0.937281	0.976155	0.979338	0.986859
YDL182W	LYS20	0.89101	0.993026	0.953087	0.987764	0.98215
YDL183C	YDL183C	0.982581	0.975338	0.980003	0.985452	0.98835
YDL184C	RPL41A
YDL185W	VMA1
YDL186W	YDL186W
YDL187C	YDL187C
YDL188C	PPH22	0.811878	0.788722	0.890153	0.749482	0.845123
YDL189W	RBS1	0.93948	0.812637	0.927	0.741001	0.864504
YDL190C	UFD2	0.860897	0.81961	0.710127	0.801315	0.679966
YDL191W	RPL35A	0.997414	0.995317	0.997658	0.998544	0.998094
YDL192W	ARF1	0.990074	0.993463	0.992835	0.993136	0.991844
YDL193W	NUS1	0.786402	0.829239	0.747935	0.829751	0.834564
YDL194W	SNF3	0.950997	0.87543	0.953607	0.876489	0.949793
YDL195W	SEC31	0.94047	0.814602	0.941774	0.878939	0.938573
YDL196W	YDL196W
YDL197C	ASF2	0.968654	0.93323	0.940941	0.836838	0.925972
YDL198C	GGC1	0.970987	0.990458	0.983562	0.986382	0.986691
YDL199C	YDL199C	0.991382	0.988897	0.991655	0.992514	0.99487
YDL200C	MGT1	0.985557	0.98267	0.987286	0.989425	0.992909
YDL201W	TRM8	0.992632	0.990562	0.992873	0.991984	0.995511
YDL202W	MRPL11	0.826831	0.892858	0.885988	0.746031	0.849029
YDL203C	ACK1	0.965607	0.954881	0.913942	0.940035	0.950664
YDL204W	RTN2	0.991802	0.96765	0.991864	0.995964	0.995442
YDL205C	HEM3	0.903219	0.955789	0.890426	0.927667	0.935415
YDL206W	YDL206W	0.723203	0.837617	0.813583	0.739338	0.636625
YDL207W	GLE1	0.898717	0.894821	0.861778	0.808403	0.87103
YDL208W	NHP2	0.996912	0.995227	0.997896	0.997739	0.998786
YDL209C	CWC2	0.835781	0.855819	0.875453	0.740989	0.770601
YDL210W	UGA4	0.992762	0.995303	0.991647	0.995466	0.995996
YDL211C	YDL211C	0.767108	0.820064	0.845652	0.807253	0.827629
YDL212W	SHR3	0.932252	0.913165	0.905031	0.916911	0.904793
YDL213C	NOP6	0.995326	0.995066	0.994162	0.996647	0.996949
YDL214C	PRR2	0.9703	0.983102	0.973391	0.992663	0.989249
YDL215C	GDH2	0.994005	0.990811	0.99397	0.993214	0.994708
YDL216C	RRI1	0.989708	0.980208	0.989236	0.983625	0.991318
YDL217C	TIM22	0.78712	0.857261	0.630265	0.778233	0.747191
YDL218W	YDL218W	0.946009	0.848651	0.965541	0.896928	0.964687
YDL219W	DTD1	0.951391	0.875798	0.91966	0.766798	0.833739
YDL220C	CDC13	0.817586	0.964921	0.782763	0.957686	0.94305
YDL221W	YDL221W
YDL222C	FMP45	0.992253	0.9688	0.990277	0.994707	0.994373
YDL223C	HBT1	0.990247	0.960726	0.986976	0.978142	0.988511
YDL224C	WHI4	0.932459	0.985584	0.958382	0.980838	0.98279
YDL225W	SHS1	0.874258	0.799655	0.74337	0.824519	0.80485
YDL226C	GCS1	0.952014	0.905045	0.934366	0.898594	0.90576
YDL227C	HO	0.858668	0.891722	0.985328	0.937516	0.975341
YDL228C	YDL228C
YDL229W	SSB1	0.998701	0.99559	0.998173	0.998462	0.998511
YDL230W	PTP1	0.950385	0.812537	0.9673	0.979335	0.98409
YDL231C	BRE4	0.986152	0.947968	0.970968	0.854662	0.94311
YDL232W	OST4
YDL233W	MFG1	0.95045	0.96655	0.961078	0.966256	0.974726
YDL234C	GYP7	0.990786	0.982859	0.988519	0.989175	0.993425
YDL235C	YPD1	0.890682	0.928988	0.855199	0.895918	0.89056
YDL236W	PHO13	0.905104	0.949984	0.862394	0.78011	0.826245
YDL237W	AIM6	0.973069	0.988473	0.985803	0.985017	0.989182
YDL238C	GUD1	0.990934	0.992203	0.995097	0.993242	0.996719
YDL239C	ADY3	0.989178	0.984791	0.987067	0.987801	0.991819
YDL240W	LRG1	0.942121	0.967644	0.935373	0.934634	0.962116
YDL241W	YDL241W	0.987838	0.941587	0.98845	0.913707	0.980162
YDL242W	YDL242W
YDL243C	AAD4
YDL244W	THI13
YDL245C	HXT15
YDL246C	SOR2
YDL247W	MPH2
YDL248W	COS7
YDR001C	NTH1	0.996786	0.974834	0.994856	0.996131	0.99752
YDR002W	YRB1	0.989842	0.986674	0.987493	0.988938	0.991181
YDR003W	RCR2	0.989529	0.975374	0.988461	0.976926	0.989146
YDR004W	RAD57	0.950208	0.968899	0.960896	0.923835	0.963011
YDR005C	MAF1	0.979538	0.984629	0.971102	0.980627	0.983132
YDR006C	SOK1	0.868076	0.884422	0.800254	0.715396	0.80836
YDR007W	TRP1	0.977562	0.972103	0.968471	0.970027	0.978748
YDR008C	YDR008C
YDR009W	GAL3
YDR010C	YDR010C
YDR011W	SNQ2	0.992349	0.973577	0.991232	0.9895	0.990588
YDR012W	RPL4B
YDR013W	PSF1	0.899632	0.973081	0.921698	0.955592	0.957668
YDR014W	RAD61	0.95078	0.90644	0.955574	0.816391	0.947921
YDR015C	YDR015C
YDR016C	DAD1	0.973936	0.973081	0.973448	0.929853	0.973961
YDR017C	KCS1	0.928562	0.92623	0.876074	0.799918	0.835904
YDR018C	YDR018C	0.99147	0.964258	0.988299	0.969638	0.98829
YDR019C	GCV1	0.984417	0.985666	0.99099	0.993657	0.994287
YDR020C	DAS2	0.910342	0.969972	0.875184	0.976034	0.966072
YDR021W	FAL1	0.961994	0.927217	0.988	0.968652	0.990317
YDR022C	ATG31	0.993744	0.983997	0.991483	0.980436	0.99153
YDR023W	SES1	0.992285	0.990705	0.99547	0.995611	0.996755
YDR024W	FYV1
YDR025W	RPS11A
YDR026C	NSI1	0.897748	0.869049	0.935775	0.960407	0.959983
YDR027C	VPS54	0.974645	0.966346	0.969484	0.947333	0.973735
YDR028C	REG1	0.930406	0.934918	0.919102	0.959877	0.948854
YDR029W	YDR029W
YDR030C	RAD28	0.97753	0.905655	0.981686	0.928831	0.975087
YDR031W	MIX14	0.989877	0.973269	0.988217	0.989121	0.993051
YDR032C	PST2	0.995365	0.981459	0.995206	0.996735	0.996344
YDR033W	MRH1	0.900537	0.785049	0.809476	0.7898	0.82028
YDR034C	LYS14	0.987176	0.964614	0.987647	0.977265	0.990977
YDR035W	ARO3	0.951872	0.873732	0.907381	0.900582	0.879088
YDR036C	EHD3	0.897825	0.862495	0.815577	0.823166	0.812595
YDR037W	KRS1	0.996632	0.964097	0.99242	0.992639	0.993571
YDR038C	ENA5
YDR039C	ENA2
YDR040C	ENA1
YDR041W	RSM10	0.973087	0.915727	0.967237	0.931767	0.969875
YDR042C	YDR042C
YDR043C	NRG1	0.987189	0.972762	0.98172	0.988302	0.989606
YDR044W	HEM13	0.938979	0.944007	0.832124	0.946108	0.934534
YDR045C	RPC11	0.973133	0.981762	0.986497	0.982001	0.990484
YDR046C	BAP3	0.939376	0.987966	0.973434	0.992531	0.99019
YDR047W	HEM12
YDR048C	YDR048C
YDR049W	VMS1	0.798043	0.750079	0.911422	0.617211	0.848969
YDR050C	TPI1	0.982547	0.974169	0.952345	0.921269	0.935261
YDR051C	DET1	0.875449	0.694865	0.901807	0.925889	0.944535
YDR052C	DBF4	0.87656	0.789185	0.858437	0.785973	0.861539
YDR053W	YDR053W
YDR054C	CDC34	0.776458	0.719848	0.735859	0.850825	0.835471
YDR055W	PST1	0.889641	0.864089	0.841015	0.902386	0.911812
YDR056C	EMC10	0.788053	0.893138	0.94682	0.936672	0.949269
YDR057W	YOS9	0.900415	0.879598	0.864268	0.938629	0.949407
YDR058C	TGL2	0.985405	0.934777	0.97839	0.986103	0.989863
YDR059C	UBC5	0.994115	0.986898	0.994615	0.994577	0.995912
YDR060W	MAK21	0.994841	0.994842	0.995732	0.99623	0.997747
YDR061W	YDR061W	0.971371	0.928679	0.982157	0.803079	0.960697
YDR062W	LCB2	0.983145	0.875701	0.960104	0.961955	0.970056
YDR063W	AIM7	0.942411	0.831585	0.969906	0.95762	0.971704
YDR064W	RPS13	0.999647	0.998026	0.999705	0.999407	0.999672
YDR065W	RRG1
YDR066C	RTR2	0.969308	0.979947	0.96734	0.978374	0.981505
YDR067C	OCA6	0.962376	0.975212	0.966082	0.962182	0.978629
YDR068W	DOS2	0.905617	0.881135	0.936129	0.907543	0.949763
YDR069C	DOA4	0.973684	0.980052	0.977993	0.981516	0.988418
YDR070C	FMP16	0.996488	0.979578	0.996079	0.995929	0.997359
YDR071C	PAA1	0.966524	0.777919	0.903603	0.869475	0.86321
YDR072C	IPT1	0.920379	0.831812	0.878737	0.811987	0.876275
YDR073W	SNF11	0.952191	0.947769	0.943311	0.950608	0.957392
YDR074W	TPS2	0.984448	0.973922	0.993031	0.995449	0.996051
YDR075W	PPH3	0.87213	0.92453	0.740224	0.835004	0.854381
YDR076W	RAD55
YDR077W	SED1	0.71662	0.94038	0.81627	0.803234	0.862741
YDR078C	SHU2	0.930764	0.805013	0.839064	0.829665	0.869668
YDR079W	PET100	0.972808	0.907857	0.96727	0.914789	0.962601
YDR080W	VPS41	0.967904	0.96022	0.939739	0.941653	0.961623
YDR081C	PDC2	0.88739	0.768958	0.811003	0.809931	0.847877
YDR082W	STN1	0.977587	0.961924	0.956549	0.958154	0.974723
YDR083W	RRP8	0.984705	0.98341	0.989122	0.989748	0.992972
YDR084C	TVP23	0.880661	0.931655	0.947541	0.974017	0.974352
YDR085C	AFR1	0.97914	0.816342	0.961988	0.965032	0.976669
YDR086C	SSS1	0.977498	0.983775	0.981177	0.988938	0.991181
YDR087C	RRP1	0.995326	0.994776	0.994147	0.997321	0.996627
YDR088C	SLU7	0.83036	0.714048	0.77259	0.62522	0.712084
YDR089W	VTC5	0.981091	0.990727	0.97503	0.988611	0.986147
YDR090C	ILT1	0.979761	0.986234	0.974162	0.973158	0.985457
YDR091C	RLI1	0.985858	0.981067	0.990395	0.990636	0.99388
YDR092W	UBC13
YDR093W	DNF2	0.971123	0.790865	0.938371	0.955201	0.963945
YDR094W	YDR094W
YDR095C	YDR095C
YDR096W	GIS1	0.984001	0.90785	0.977821	0.970971	0.982942
YDR097C	MSH6	0.945499	0.89124	0.891131	0.809676	0.763054
YDR098C	GRX3	0.912514	0.852482	0.889333	0.870355	0.872668
YDR099W	BMH2	0.967078	0.973283	0.979866	0.978835	0.981045
YDR100W	TVP15	0.982141	0.959653	0.988425	0.970674	0.988378
YDR101C	ARX1	0.996129	0.996508	0.99661	0.996479	0.997642
YDR102C	YDR102C
YDR103W	STE5	0.971318	0.97556	0.91168	0.983218	0.975826
YDR104C	SPO71	0.986497	0.976372	0.978555	0.981704	0.985844
YDR105C	TMS1	0.933795	0.979647	0.949103	0.982641	0.97859
YDR106W	ARP10	0.865571	0.979511	0.881257	0.982406	0.975831
YDR107C	TMN2	0.932194	0.928497	0.976767	0.956492	0.980237
YDR108W	TRS85	0.949328	0.849302	0.91183	0.923758	0.948485
YDR109C	YDR109C	0.931584	0.81756	0.867645	0.650141	0.785609
YDR110W	FOB1	0.837427	0.94416	0.911657	0.976779	0.975941
YDR111C	ALT2
YDR112W	IRC2
YDR113C	PDS1	0.91374	0.963744	0.936949	0.953776	0.959106
YDR114C	YDR114C
YDR115W	MRX14	0.884248	0.974188	0.811898	0.900961	0.86685
YDR116C	MRPL1	0.791776	0.909531	0.797697	0.764018	0.829037
YDR117C	TMA64	0.857439	0.78144	0.808391	0.821505	0.840735
YDR118W	APC4	0.961434	0.926195	0.971912	0.920521	0.975564
YDR119W	VBA4	0.941869	0.964082	0.944728	0.968472	0.971088
YDR120C	TRM1	0.984908	0.969483	0.98739	0.984757	0.991088
YDR121W	DPB4	0.972417	0.761826	0.965064	0.888136	0.937621
YDR122W	KIN1	0.988367	0.989047	0.990492	0.993849	0.99548
YDR123C	INO2
YDR124W	YDR124W
YDR125C	ECM18
YDR126W	SWF1	0.90184	0.884484	0.700153	0.917247	0.901285
YDR127W	ARO1	0.975493	0.834185	0.948278	0.891473	0.932311
YDR128W	MTC5	0.930048	0.968564	0.876591	0.934706	0.93395
YDR129C	SAC6	0.977892	0.975004	0.985961	0.990749	0.991797
YDR130C	FIN1	0.966412	0.956426	0.969161	0.944869	0.974822
YDR131C	YDR131C	0.967303	0.982361	0.979963	0.983582	0.988534
YDR132C	MRX16	0.947853	0.901032	0.881073	0.958471	0.961094
YDR133C	YDR133C
YDR134C	CCW22
YDR135C	YCF1	0.947994	0.957237	0.86482	0.824026	0.842264
YDR136C	VPS61
YDR137W	RGP1	0.958857	0.964556	0.941742	0.939911	0.954954
YDR138W	HPR1
YDR139C	RUB1
YDR140W	MTQ2	0.914975	0.815225	0.745126	0.727544	0.781421
YDR141C	DOP1	0.93196	0.931149	0.939064	0.885704	0.9413
YDR142C	PEX7	0.965992	0.970998	0.934673	0.958479	0.965351
YDR143C	SAN1	0.92668	0.942541	0.917867	0.956293	0.96216
YDR144C	MKC7	0.993003	0.952878	0.990976	0.986652	0.992691
YDR145W	TAF12
YDR146C	SWI5	0.873106	0.960955	0.925702	0.914919	0.942416
YDR147W	EKI1	0.90205	0.975293	0.941973	0.978111	0.971452
YDR148C	KGD2	0.983913	0.96295	0.985186	0.985014	0.989195
YDR149C	YDR149C
YDR150W	NUM1	0.957456	0.942247	0.966855	0.829298	0.94546
YDR151C	CTH1	0.687208	0.763755	0.855531	0.799191	0.598636
YDR152W	GIR2	0.97868	0.967335	0.992353	0.946206	0.981519
YDR153C	ENT5	0.890267	0.865568	0.83422	0.803872	0.791642
YDR154C	YDR154C
YDR155C	CPR1	0.951906	0.983538	0.972364	0.958572	0.971359
YDR156W	RPA14	0.989471	0.994145	0.993111	0.989966	0.993361
YDR157W	YDR157W
YDR158W	HOM2	0.918973	0.926556	0.948278	0.925293	0.932311
YDR159W	SAC3	0.861695	0.814507	0.794087	0.718384	0.791005
YDR160W	SSY1	0.948122	0.978392	0.948123	0.958863	0.969061
YDR161W	ACL4	0.993879	0.986205	0.995418	0.995635	0.996645
YDR162C	NBP2	0.936876	0.758179	0.92235	0.79947	0.872349
YDR163W	CWC15	0.697236	0.883719	0.923331	0.851306	0.9298
YDR164C	SEC1	0.876316	0.93432	0.700255	0.941619	0.903346
YDR165W	TRM82	0.994479	0.982634	0.995322	0.993546	0.996459
YDR166C	SEC5	0.920559	0.919057	0.902665	0.856949	0.917534
YDR167W	TAF10	0.705358	0.840999	0.838895	0.877992	0.893663
YDR168W	CDC37	0.854148	0.951868	0.8437	0.976827	0.950193
YDR169C	STB3	0.948704	0.94279	0.969312	0.965698	0.976782
YDR170C	SEC7	0.935138	0.950229	0.891831	0.809851	0.84339
YDR171W	HSP42	0.991608	0.964102	0.991646	0.995044	0.995513
YDR172W	SUP35	0.993262	0.984225	0.995563	0.994014	0.996775
YDR173C	ARG82	0.874105	0.834463	0.895743	0.782489	0.869231
YDR174W	HMO1	0.863579	0.925577	0.861518	0.881148	0.89053
YDR175C	RSM24	0.750345	0.889463	0.83234	0.79421	0.794685
YDR176W	NGG1	0.840075	0.947241	0.907274	0.925704	0.942202
YDR177W	UBC1	0.733946	0.92557	0.856955	0.879279	0.876123
YDR178W	SDH4	0.985071	0.979671	0.991521	0.988454	0.992474
YDR179C	CSN9	0.871104	0.968885	0.946514	0.96064	0.969406
YDR180W	SCC2	0.917518	0.831306	0.842768	0.718312	0.828706
YDR181C	SAS4	0.958805	0.953321	0.948312	0.941927	0.964761
YDR182W	CDC1	0.894246	0.967867	0.943601	0.956149	0.963331
YDR183W	PLP1	0.927445	0.818086	0.812193	0.918993	0.908999
YDR184C	ATC1	0.985935	0.984701	0.9941	0.991245	0.995297
YDR185C	UPS3
YDR186C	SND1	0.958323	0.968123	0.912604	0.955328	0.950003
YDR187C	YDR187C
YDR188W	CCT6	0.978255	0.985921	0.972235	0.984965	0.98814
YDR189W	SLY1	0.917765	0.903216	0.83761	0.888179	0.885428
YDR190C	RVB1	0.979294	0.969254	0.980126	0.985141	0.986173
YDR191W	HST4	0.944079	0.900765	0.94881	0.965809	0.973936
YDR192C	NUP42	0.827698	0.923123	0.813143	0.916256	0.91709
YDR193W	YDR193W
YDR194C	MSS116	0.962179	0.950929	0.979384	0.973466	0.984596
YDR195W	REF2	0.923051	0.917646	0.762909	0.888791	0.896939
YDR196C	CAB5	0.98109	0.962308	0.984453	0.9805	0.984098
YDR197W	CBS2	0.960754	0.801533	0.893998	0.946002	0.954812
YDR198C	RKM2	0.767831	0.951381	0.647859	0.92463	0.838453
YDR199W	YDR199W
YDR200C	VPS64	0.921378	0.942516	0.914816	0.952398	0.957058
YDR201W	SPC19	0.841328	0.908469	0.903021	0.905022	0.930646
YDR202C	RAV2	0.981013	0.984221	0.979652	0.984894	0.989573
YDR203W	YDR203W
YDR204W	COQ4	0.992096	0.985054	0.990905	0.994985	0.995788
YDR205W	MSC2	0.760231	0.860229	0.797562	0.886324	0.880537
YDR206W	EBS1	0.891186	0.913533	0.691637	0.904254	0.833145
YDR207C	UME6	0.890023	0.905864	0.847308	0.728088	0.83024
YDR208W	MSS4	0.943378	0.962839	0.921682	0.868129	0.924552
YDR209C	YDR209C
YDR210W	YDR210W
YDR211W	GCD6	0.971607	0.872248	0.970684	0.96396	0.974074
YDR212W	TCP1	0.976494	0.986407	0.976307	0.989794	0.98865
YDR213W	UPC2	0.806931	0.807896	0.63693	0.799288	0.705956
YDR214W	AHA1	0.936758	0.987211	0.938921	0.976257	0.967342
YDR215C	YDR215C
YDR216W	ADR1	0.940787	0.967269	0.967686	0.975667	0.984754
YDR217C	RAD9	0.858407	0.910541	0.823273	0.630818	0.79281
YDR218C	SPR28
YDR219C	MFB1	0.967108	0.981588	0.97854	0.97584	0.984875
YDR220C	YDR220C
YDR221W	GTB1	0.961482	0.960241	0.971439	0.982906	0.986346
YDR222W	YDR222W	0.940154	0.956874	0.934441	0.958419	0.965897
YDR223W	CRF1	0.97225	0.965649	0.97455	0.987378	0.989086
YDR224C	HTB1	0.939052	0.936759	0.93189	0.972876	0.949045
YDR225W	HTA1	0.913045	0.88447	0.885853	0.867092	0.881095
YDR226W	ADK1	0.987249	0.972729	0.986037	0.990705	0.990218
YDR227W	SIR4	0.878258	0.928862	0.903964	0.844908	0.917538
YDR228C	PCF11	0.894931	0.865091	0.728361	0.838688	0.794902
YDR229W	IVY1	0.940733	0.963862	0.965431	0.973089	0.981324
YDR230W	YDR230W
YDR231C	COX20	0.99001	0.956353	0.992628	0.98619	0.992924
YDR232W	HEM1	0.839175	0.928572	0.836891	0.952831	0.931847
YDR233C	RTN1	0.981775	0.95125	0.994557	0.9828	0.991333
YDR234W	LYS4	0.879721	0.98552	0.828166	0.954491	0.928033
YDR235W	PRP42	0.945996	0.964534	0.941831	0.934366	0.959314
YDR236C	FMN1	0.975385	0.948792	0.967123	0.923906	0.965511
YDR237W	MRPL7	0.884173	0.932697	0.811594	0.947667	0.925054
YDR239C	YDR239C
YDR240C	SNU56	0.751573	0.894211	0.613426	0.678917	0.702554
YDR241W	BUD26
YDR246W	TRS23	0.855529	0.733428	0.75646	0.781764	0.833264
YDR247W	VHS1	0.948072	0.972575	0.968681	0.977825	0.984009
YDR248C	YDR248C	0.985174	0.986767	0.986448	0.99127	0.993233
YDR249C	YDR249C	0.881762	0.844787	0.878363	0.697472	0.837079
YDR250C	YDR250C
YDR251W	PAM1	0.975467	0.969253	0.974267	0.975158	0.98276
YDR252W	BTT1	0.985395	0.978364	0.98231	0.983079	0.989355
YDR253C	MET32	0.992653	0.995435	0.994687	0.995925	0.997011
YDR254W	CHL4	0.988894	0.971031	0.984069	0.978766	0.987671
YDR255C	RMD5	0.985566	0.973688	0.98197	0.987378	0.989239
YDR256C	CTA1	0.944587	0.953099	0.977632	0.972931	0.982325
YDR257C	RKM4	0.918419	0.865111	0.759847	0.871942	0.873836
YDR258C	HSP78	0.986815	0.943207	0.985928	0.948719	0.977022
YDR259C	YAP6	0.969408	0.974154	0.969418	0.983802	0.985457
YDR260C	SWM1
YDR261C	EXG2	0.897745	0.986	0.858512	0.962006	0.916414
YDR262W	YDR262W	0.986479	0.981388	0.987513	0.970679	0.987842
YDR263C	DIN7	0.813659	0.946184	0.930401	0.974225	0.97251
YDR264C	AKR1	0.874059	0.805801	0.930367	0.828959	0.914083
YDR265W	PEX10	0.986304	0.907103	0.981542	0.959023	0.98406
YDR266C	HEL2	0.959454	0.882166	0.967966	0.892022	0.964301
YDR267C	CIA1	0.934349	0.840528	0.843663	0.851924	0.77369
YDR268W	MSW1	0.92163	0.729494	0.933589	0.913261	0.948352
YDR269C	YDR269C
YDR270W	CCC2	0.764372	0.971564	0.956389	0.930237	0.965351
YDR271C	YDR271C
YDR272W	GLO2	0.984623	0.959479	0.98141	0.988344	0.989383
YDR273W	DON1	0.974244	0.965527	0.950233	0.946019	0.969311
YDR274C	YDR274C
YDR275W	BSC2	0.977856	0.899606	0.983323	0.949996	0.978401
YDR276C	PMP3	0.969397	0.948964	0.956782	0.978953	0.973388
YDR277C	MTH1	0.979018	0.847103	0.939641	0.867227	0.933017
YDR278C	YDR278C
YDR279W	RNH202
YDR280W	RRP45	0.950585	0.963461	0.888195	0.96256	0.951968
YDR281C	PHM6	0.760274	0.96661	0.949741	0.945103	0.950686
YDR282C	MRX10	0.956912	0.939638	0.972745	0.954822	0.978261
YDR283C	GCN2	0.974924	0.973877	0.978124	0.964333	0.978405
YDR284C	DPP1	0.984421	0.981879	0.993094	0.980806	0.993919
YDR285W	ZIP1	0.879296	0.970792	0.946972	0.977987	0.978703
YDR286C	MGP12	0.964166	0.782104	0.947078	0.929195	0.95842
YDR287W	INM2	0.988319	0.962781	0.989077	0.985376	0.992648
YDR288W	NSE3	0.976637	0.946946	0.945638	0.958117	0.965772
YDR289C	RTT103
YDR290W	YDR290W
YDR291W	HRQ1	0.912004	0.945746	0.827963	0.956238	0.939293
YDR292C	SRP101	0.946757	0.879344	0.900258	0.90988	0.935101
YDR293C	SSD1	0.936814	0.930791	0.946332	0.965011	0.968493
YDR294C	DPL1	0.934518	0.63252	0.940637	0.915943	0.928617
YDR295C	HDA2	0.86384	0.905277	0.765681	0.793585	0.827816
YDR296W	MHR1	0.884863	0.93211	0.879885	0.831502	0.854218
YDR297W	SUR2	0.925867	0.854117	0.87657	0.894973	0.908026
YDR298C	ATP5	0.985372	0.944432	0.975728	0.942258	0.976717
YDR299W	BFR2	0.988187	0.988787	0.993427	0.991501	0.99544
YDR300C	PRO1	0.98698	0.963256	0.987839	0.979754	0.990308
YDR301W	CFT1	0.916935	0.860381	0.834461	0.799309	0.823305
YDR302W	GPI11	0.870042	0.876364	0.782948	0.930654	0.870794
YDR303C	RSC3	0.782296	0.888338	0.820977	0.776973	0.849387
YDR304C	CPR5	0.809943	0.914501	0.943731	0.928045	0.92399
YDR305C	HNT2	0.953691	0.915219	0.942651	0.963103	0.970309
YDR306C	PFU1	0.982201	0.974416	0.982423	0.975167	0.986859
YDR307W	PMT7	0.888008	0.855339	0.964023	0.803817	0.937459
YDR308C	SRB7	0.905249	0.904404	0.849623	0.801257	0.859892
YDR309C	GIC2	0.885528	0.87086	0.78328	0.689696	0.761317
YDR310C	SUM1	0.815041	0.904127	0.854078	0.839622	0.859681
YDR311W	TFB1	0.963203	0.79213	0.911149	0.787756	0.885314
YDR312W	SSF2	0.9834	0.985047	0.98664	0.984559	0.989956
YDR313C	PIB1	0.983554	0.959233	0.982001	0.965722	0.984267
YDR314C	RAD34	0.937982	0.97782	0.960665	0.976488	0.980064
YDR315C	IPK1	0.981501	0.819591	0.983151	0.957261	0.983711
YDR316W	OMS1	0.884389	0.895503	0.717666	0.776873	0.752259
YDR317W	HIM1
YDR318W	MCM21	0.971119	0.896112	0.953037	0.651342	0.905158
YDR319C	YFT2	0.986941	0.920577	0.986286	0.930303	0.981765
YDR320C	SWA2	0.917653	0.696205	0.837789	0.70195	0.837459
YDR321W	ASP1	0.997463	0.993364	0.995304	0.996174	0.996815
YDR322W	MRPL35	0.850754	0.928878	0.78215	0.840618	0.819523
YDR323C	PEP7	0.951824	0.812904	0.962319	0.641273	0.933636
YDR324C	UTP4	0.993412	0.992884	0.996415	0.996801	0.997275
YDR325W	YCG1	0.887368	0.828803	0.905813	0.706509	0.848315
YDR326C	YSP2	0.869808	0.852326	0.787028	0.740395	0.802754
YDR327W	YDR327W
YDR328C	SKP1	0.948573	0.855986	0.967129	0.953895	0.96828
YDR329C	PEX3	0.980739	0.957045	0.979308	0.974218	0.985843
YDR330W	UBX5	0.98259	0.95141	0.982363	0.986845	0.990304
YDR331W	GPI8	0.9196	0.907738	0.79459	0.808591	0.765674
YDR332W	IRC3	0.941812	0.882439	0.861359	0.914481	0.927731
YDR333C	RQC1	0.814579	0.82149	0.753621	0.885571	0.84612
YDR334W	SWR1	0.848947	0.856806	0.737589	0.895172	0.849528
YDR335W	MSN5	0.964733	0.960913	0.957044	0.972451	0.976302
YDR336W	MRX8	0.951764	0.950702	0.965378	0.959147	0.972853
YDR337W	MRPS28	0.7051	0.79662	0.704884	0.859908	0.754978
YDR338C	YDR338C	0.94642	0.941937	0.90543	0.958087	0.961639
YDR339C	FCF1	0.97569	0.988329	0.990229	0.992315	0.994624
YDR340W	YDR340W
YDR341C	YDR341C	0.991055	0.982959	0.990514	0.991606	0.99285
YDR342C	HXT7
YDR343C	HXT6
YDR344C	YDR344C
YDR345C	HXT3	0.956747	0.920399	0.956607	0.981266	0.974677
YDR346C	SVF1	0.980489	0.9453	0.973083	0.984359	0.985719
YDR347W	MRP1	0.807965	0.896693	0.892114	0.703723	0.839064
YDR348C	PAL1	0.886915	0.962316	0.776688	0.906141	0.882289
YDR349C	YPS7	0.885683	0.88049	0.840149	0.747193	0.823534
YDR350C	ATP22	0.980838	0.952653	0.97684	0.973486	0.984309
YDR351W	SBE2	0.894959	0.806739	0.836579	0.736918	0.854361
YDR352W	YPQ2	0.967592	0.967833	0.930163	0.877849	0.918244
YDR353W	TRR1	0.979939	0.941973	0.954833	0.93163	0.956668
YDR354W	TRP4	0.963294	0.976703	0.974664	0.971097	0.985378
YDR355C	YDR355C
YDR356W	SPC110	0.923804	0.965717	0.943954	0.886269	0.944487
YDR357C	CNL1	0.970125	0.878536	0.96001	0.943875	0.96807
YDR358W	GGA1	0.990355	0.971842	0.99104	0.990964	0.993974
YDR359C	EAF1	0.869328	0.914633	0.774137	0.863638	0.873626
YDR360W	OPI7
YDR361C	BCP1	0.990535	0.98677	0.992813	0.992693	0.995288
YDR362C	TFC6	0.969839	0.89761	0.912476	0.886101	0.926374
YDR363W	ESC2
YDR364C	CDC40	0.705763	0.774059	0.685378	0.67668	0.62486
YDR365C	ESF1	0.99613	0.994061	0.996994	0.995596	0.997416
YDR366C	YDR366C
YDR367W	KEI1	0.879308	0.935065	0.778391	0.96306	0.888955
YDR368W	YPR1	0.969661	0.78311	0.978942	0.890913	0.949324
YDR369C	XRS2	0.972433	0.964803	0.946884	0.957849	0.971528
YDR370C	DXO1
YDR371W	CTS2	0.9259	0.846414	0.816454	0.707399	0.813991
YDR372C	VPS74	0.837516	0.81307	0.812135	0.869583	0.845547
YDR373W	FRQ1	0.860671	0.891508	0.932499	0.949303	0.926668
YDR374C	PHO92
YDR375C	BCS1	0.828249	0.803947	0.724709	0.775602	0.707163
YDR376W	ARH1	0.937575	0.902398	0.915825	0.920322	0.940027
YDR377W	ATP17	0.985665	0.971847	0.98012	0.975288	0.978978
YDR378C	LSM6	0.931941	0.81877	0.89137	0.869475	0.877817
YDR379W	RGA2	0.975632	0.932368	0.958164	0.930651	0.966014
YDR380W	ARO10	0.807266	0.884134	0.803874	0.739315	0.765619
YDR381W	YRA1
YDR382W	RPP2B	0.996602	0.998571	0.998226	0.999161	0.99906
YDR383C	NKP1	0.902773	0.902185	0.923418	0.91655	0.944398
YDR384C	ATO3	0.973673	0.964833	0.979303	0.985486	0.986915
YDR385W	EFT2	0.996561	0.986021	0.997413	0.996472	0.996899
YDR386W	MUS81	0.961827	0.961667	0.975842	0.933906	0.973747
YDR387C	CIN10	0.980107	0.963081	0.979554	0.958937	0.983066
YDR388W	RVS167	0.964828	0.947024	0.979712	0.98138	0.986638
YDR389W	SAC7	0.811484	0.911643	0.779862	0.795164	0.841364
YDR390C	UBA2	0.901038	0.787544	0.783079	0.766193	0.778174
YDR391C	YDR391C	0.989753	0.99011	0.990903	0.992147	0.995136
YDR392W	SPT3	0.945138	0.951005	0.952456	0.930459	0.959761
YDR393W	SHE9	0.907754	0.777223	0.76776	0.597962	0.701
YDR394W	RPT3	0.918397	0.837968	0.941481	0.935262	0.943117
YDR395W	SXM1	0.990845	0.983466	0.987707	0.992851	0.993608
YDR396W	YDR396W
YDR397C	NCB2	0.865554	0.916109	0.894798	0.844326	0.874122
YDR398W	UTP5	0.986958	0.992558	0.995083	0.996753	0.996557
YDR399W	HPT1	0.956498	0.949303	0.978391	0.990913	0.987371
YDR400W	URH1	0.938547	0.927734	0.925309	0.781043	0.755802
YDR401W	YDR401W
YDR402C	DIT2
YDR403W	DIT1
YDR404C	RPB7	0.919711	0.925246	0.889045	0.946995	0.93151
YDR405W	MRP20	0.925918	0.882854	0.842528	0.816469	0.858772
YDR406W	PDR15	0.981881	0.941701	0.979074	0.962571	0.980373
YDR407C	TRS120	0.950929	0.902337	0.913647	0.919124	0.930616
YDR408C	ADE8	0.945295	0.914767	0.939052	0.92868	0.929913
YDR409W	SIZ1	0.761299	0.950081	0.795847	0.899427	0.906493
YDR410C	STE14	0.911416	0.878023	0.9271	0.833045	0.915522
YDR411C	DFM1	0.979336	0.95531	0.985012	0.959213	0.981452
YDR412W	RRP17	0.989491	0.990462	0.993585	0.996193	0.996582
YDR413C	YDR413C
YDR414C	ERD1	0.932633	0.888868	0.905917	0.940428	0.943486
YDR415C	YDR415C	0.934665	0.943006	0.959577	0.860641	0.95383
YDR416W	SYF1	0.916617	0.876979	0.913206	0.759781	0.879056
YDR417C	YDR417C
YDR418W	RPL12B	0.998777	0.997002	0.999275	0.999277	0.999567
YDR419W	RAD30	0.94766	0.889578	0.914896	0.90833	0.943722
YDR420W	HKR1	0.870891	0.844536	0.717666	0.782375	0.814902
YDR421W	ARO80	0.983052	0.951246	0.972408	0.936994	0.974151
YDR422C	SIP1	0.889404	0.738829	0.900412	0.717779	0.879059
YDR423C	CAD1	0.982268	0.974465	0.983252	0.981885	0.988407
YDR424C	DYN2	0.882563	0.934435	0.931948	0.942416	0.960055
YDR425W	SNX41	0.979292	0.977617	0.987871	0.981675	0.990831
YDR426C	YDR426C
YDR427W	RPN9	0.869559	0.830943	0.889288	0.903217	0.903564
YDR428C	BNA7	0.821146	0.798069	0.876151	0.718616	0.854713
YDR429C	TIF35	0.995296	0.996447	0.99583	0.995032	0.996802
YDR430C	CYM1	0.819292	0.959096	0.716806	0.962416	0.931843
YDR431W	YDR431W
YDR432W	NPL3	0.985795	0.968215	0.979551	0.983343	0.985943
YDR433W	YDR433W
YDR434W	GPI17	0.77299	0.890779	0.895195	0.814941	0.885917
YDR435C	PPM1	0.982171	0.980887	0.982565	0.986544	0.989292
YDR436W	PPZ2	0.985075	0.95598	0.975737	0.963507	0.982523
YDR437W	GPI19
YDR438W	THI74	0.949382	0.979955	0.944608	0.970896	0.976744
YDR439W	LRS4	0.824104	0.775976	0.704002	0.737041	0.773857
YDR440W	DOT1	0.94331	0.943188	0.80211	0.724858	0.766461
YDR441C	APT2	0.931292	0.901991	0.97992	0.673483	0.901087
YDR442W	YDR442W
YDR443C	SSN2
YDR444W	YDR444W	0.752566	0.906399	0.888692	0.87337	0.922421
YDR445C	YDR445C
YDR446W	ECM11	0.974723	0.934456	0.98548	0.984629	0.989604
YDR447C	RPS17B
YDR448W	ADA2
YDR449C	UTP6
YDR450W	RPS18A	0.999386	0.998103	0.999465	0.999591	0.99971
YDR451C	YHP1	0.967075	0.970577	0.972835	0.977035	0.983762
YDR452W	PPN1	0.980483	0.955742	0.976005	0.958337	0.977955
YDR453C	TSA2	0.992077	0.919676	0.984816	0.96282	0.985915
YDR454C	GUK1	0.994135	0.99024	0.994683	0.995485	0.99686
YDR455C	YDR455C
YDR456W	NHX1	0.942585	0.960773	0.953558	0.919877	0.949244
YDR457W	TOM1	0.855228	0.904712	0.928701	0.749658	0.78279
YDR458C	HEH2	0.94184	0.951463	0.91058	0.891528	0.935221
YDR459C	PFA5	0.969851	0.953948	0.974766	0.985178	0.985664
YDR460W	TFB3	0.915941	0.945851	0.96304	0.967273	0.979801
YDR461W	MFA1
YDR462W	MRPL28	0.907193	0.907223	0.896334	0.905503	0.910541
YDR463W	STP1	0.973863	0.978255	0.958916	0.958703	0.970422
YDR464W	SPP41	0.881923	0.938821	0.762928	0.846886	0.801815
YDR465C	RMT2	0.993307	0.996474	0.995771	0.99616	0.997428
YDR466W	PKH3	0.942414	0.958893	0.948658	0.961158	0.965556
YDR467C	YDR467C
YDR468C	TLG1	0.884538	0.876803	0.906605	0.788215	0.684216
YDR469W	SDC1	0.81367	0.911438	0.813808	0.839776	0.868145
YDR470C	UGO1	0.850747	0.869537	0.825394	0.776627	0.861315
YDR471W	RPL27B	0.998346	0.996687	0.99858	0.998021	0.998879
YDR472W	TRS31	0.91871	0.844229	0.828785	0.866138	0.876495
YDR473C	PRP3	0.940151	0.957987	0.889677	0.929128	0.94702
YDR475C	JIP4	0.988422	0.970576	0.985849	0.973177	0.98924
YDR476C	YDR476C	0.930749	0.935231	0.9563	0.947782	0.96153
YDR477W	SNF1	0.923111	0.877474	0.919013	0.869217	0.901408
YDR478W	SNM1	0.842844	0.901248	0.739243	0.886479	0.889547
YDR479C	PEX29	0.991091	0.982174	0.987851	0.982957	0.991375
YDR480W	DIG2	0.966729	0.973335	0.977041	0.96798	0.980261
YDR481C	PHO8	0.931181	0.985325	0.983632	0.985324	0.987738
YDR482C	CWC21	0.957063	0.930236	0.940803	0.936352	0.964148
YDR483W	KRE2	0.87306	0.772578	0.817966	0.837867	0.830675
YDR484W	VPS52	0.928701	0.93749	0.863107	0.932935	0.93395
YDR485C	VPS72	0.941683	0.963693	0.932603	0.963486	0.969271
YDR486C	VPS60	0.912963	0.682697	0.918521	0.779198	0.902298
YDR487C	RIB3	0.809178	0.834655	0.852594	0.876256	0.823484
YDR488C	PAC11	0.774094	0.876071	0.841911	0.732481	0.851889
YDR489W	SLD5	0.818625	0.867025	0.819815	0.874545	0.917043
YDR490C	PKH1	0.985846	0.980018	0.971839	0.982006	0.987112
YDR491C	YDR491C
YDR492W	IZH1	0.916301	0.907297	0.909569	0.799323	0.875446
YDR493W	MZM1	0.704071	0.950621	0.794612	0.80354	0.806339
YDR494W	RSM28	0.900071	0.838075	0.85172	0.880922	0.881195
YDR495C	VPS3	0.941911	0.940316	0.943702	0.936167	0.960883
YDR496C	PUF6	0.996032	0.996508	0.995755	0.996616	0.997747
YDR497C	ITR1	0.987925	0.982507	0.993216	0.983441	0.992193
YDR498C	SEC20	0.900028	0.921753	0.77365	0.858914	0.840465
YDR499W	LCD1	0.883456	0.873275	0.876343	0.797389	0.870674
YDR500C	RPL37B
YDR501W	PLM2	0.903606	0.961422	0.919542	0.907228	0.929415
YDR502C	SAM2	0.991823	0.994369	0.988482	0.979892	0.982772
YDR503C	LPP1	0.813329	0.894403	0.761037	0.968979	0.952435
YDR504C	SPG3
YDR505C	PSP1	0.904747	0.871548	0.95686	0.970859	0.977872
YDR506C	GMC1
YDR507C	GIN4	0.923608	0.941176	0.840461	0.788873	0.853394
YDR508C	GNP1	0.968562	0.945577	0.976105	0.975264	0.985524
YDR509W	YDR509W
YDR510W	SMT3	0.947995	0.757856	0.742835	0.900016	0.788455
YDR511W	SDH7	0.927355	0.771506	0.908264	0.96279	0.95119
YDR512C	EMI1	0.967257	0.868943	0.982407	0.970933	0.985831
YDR513W	GRX2	0.992524	0.977142	0.99027	0.993207	0.993464
YDR514C	YDR514C	0.777977	0.864393	0.759019	0.856654	0.817986
YDR515W	SLF1
YDR516C	EMI2	0.978426	0.967264	0.99162	0.986842	0.993701
YDR517W	GRH1	0.974293	0.900885	0.983843	0.885033	0.96316
YDR518W	EUG1	0.878534	0.743437	0.789857	0.800803	0.768822
YDR519W	FPR2	0.649927	0.910505	0.741829	0.949303	0.909367
YDR520C	URC2	0.935569	0.935638	0.919723	0.944412	0.954969
YDR521W	YDR521W
YDR522C	SPS2
YDR523C	SPS1	0.661529	0.912696	0.634534	0.900623	0.768202
YDR524C	AGE1	0.807161	0.904784	0.800884	0.822104	0.735892
YDR525W	API2
YDR526C	YDR526C
YDR527W	RBA50	0.91871	0.799815	0.942188	0.83668	0.935551
YDR528W	HLR1	0.861429	0.893054	0.832079	0.851041	0.88785
YDR529C	QCR7	0.991755	0.975527	0.992292	0.985821	0.990076
YDR530C	APA2	0.992096	0.981991	0.989365	0.988582	0.993458
YDR531W	CAB1	0.804629	0.85291	0.63263	0.900435	0.769228
YDR532C	KRE28	0.948866	0.951578	0.934054	0.831892	0.928266
YDR533C	HSP31	0.994805	0.934867	0.989193	0.989658	0.991873
YDR534C	FIT1	0.88983	0.952652	0.949666	0.730536	0.905264
YDR535C	YDR535C
YDR536W	STL1	0.947549	0.960611	0.922428	0.973216	0.974606
YDR537C	YDR537C
YDR538W	PAD1	0.863004	0.812784	0.741855	0.727592	0.733571
YDR539W	FDC1	0.914294	0.899834	0.924912	0.881545	0.92886
YDR540C	IRC4
YDR541C	YDR541C
YDR542W	PAU10
YDR543C	YDR543C
YDR544C	YDR544C
YDR545W	YRF1-1
YEL001C	IRC22	0.975141	0.879343	0.963231	0.937537	0.96359
YEL002C	WBP1	0.924502	0.880835	0.904634	0.817397	0.895979
YEL003W	GIM4	0.969343	0.979663	0.97317	0.990381	0.988239
YEL004W	YEA4	0.875364	0.875039	0.9035	0.869657	0.927402
YEL005C	VAB2	0.982595	0.899724	0.981752	0.951106	0.979658
YEL006W	YEA6	0.980577	0.978116	0.976521	0.985503	0.987037
YEL007W	MIT1	0.88045	0.795376	0.819294	0.895516	0.871031
YEL008W	YEL008W
YEL009C	GCN4	0.88965	0.936755	0.803453	0.782484	0.82747
YEL010W	YEL010W
YEL011W	GLC3	0.997448	0.986107	0.996647	0.997619	0.998098
YEL012W	UBC8	0.993494	0.990324	0.99477	0.993923	0.996244
YEL013W	VAC8	0.847218	0.861273	0.91181	0.83382	0.922316
YEL014C	YEL014C
YEL015W	EDC3	0.92241	0.886549	0.812372	0.892152	0.879756
YEL016C	NPP2	0.949913	0.983514	0.969652	0.98389	0.985346
YEL017W	GTT3	0.957525	0.964196	0.971443	0.920703	0.968737
YEL018W	EAF5	0.943366	0.758359	0.935059	0.941582	0.952098
YEL019C	MMS21
YEL020C	PXP1	0.979801	0.975558	0.975383	0.987046	0.987846
YEL021W	URA3
YEL022W	GEA2	0.964726	0.880952	0.932348	0.951633	0.96715
YEL023C	YEL023C	0.946552	0.933311	0.86428	0.897389	0.921906
YEL024W	RIP1	0.985916	0.915034	0.97594	0.951393	0.976622
YEL025C	YEL025C	0.962802	0.907875	0.96365	0.950439	0.974229
YEL026W	SNU13	0.996929	0.996189	0.998001	0.997907	0.998242
YEL027W	VMA3	0.941623	0.918585	0.894102	0.904852	0.914337
YEL028W	YEL028W
YEL029C	BUD16	0.836852	0.823858	0.829975	0.809424	0.800416
YEL030W	ECM10	0.939494	0.979934	0.826888	0.980623	0.970578
YEL031W	SPF1	0.990076	0.967177	0.952885	0.983343	0.976829
YEL032W	MCM3	0.898267	0.962169	0.88157	0.931057	0.94755
YEL033W	MTC7
YEL034W	HYP2	0.995465	0.989292	0.994075	0.994371	0.995127
YEL035C	UTR5
YEL036C	ANP1	0.969611	0.982672	0.969073	0.964904	0.9771
YEL037C	RAD23	0.978026	0.987082	0.972417	0.989442	0.985978
YEL038W	UTR4	0.918842	0.780506	0.899731	0.966383	0.956852
YEL039C	CYC7	0.991458	0.943265	0.991894	0.992866	0.995284
YEL040W	UTR2	0.984895	0.98784	0.979872	0.987773	0.992691
YEL041W	YEF1	0.980135	0.964301	0.985133	0.977056	0.986754
YEL042W	GDA1	0.992606	0.948001	0.991385	0.971498	0.986024
YEL043W	YEL043W	0.897825	0.697788	0.862062	0.867405	0.855022
YEL044W	IES6	0.918276	0.908913	0.868568	0.910665	0.893663
YEL045C	YEL045C
YEL046C	GLY1	0.962141	0.87479	0.935075	0.886296	0.940004
YEL047C	FRD1	0.740061	0.753943	0.699078	0.812108	0.8236
YEL048C	TCA17
YEL049W	PAU2
YEL050C	RML2	0.885343	0.942657	0.945787	0.944583	0.957645
YEL051W	VMA8	0.715115	0.951167	0.910114	0.927423	0.899048
YEL052W	AFG1	0.923929	0.968364	0.969441	0.972345	0.979405
YEL053C	MAK10	0.936383	0.85897	0.968664	0.935156	0.969592
YEL054C	RPL12A	0.998691	0.998224	0.999087	0.998899	0.999193
YEL055C	POL5	0.993807	0.954052	0.994081	0.982266	0.992823
YEL056W	HAT2	0.888502	0.904281	0.717655	0.841887	0.818461
YEL057C	SDD1
YEL058W	PCM1	0.891312	0.972757	0.914741	0.920624	0.93493
YEL059W	HHY1
YEL060C	PRB1	0.990059	0.991836	0.99379	0.995023	0.995136
YEL061C	CIN8	0.913191	0.966419	0.939652	0.926213	0.952676
YEL062W	NPR2	0.97042	0.957561	0.972944	0.959451	0.978565
YEL063C	CAN1	0.994589	0.987882	0.987086	0.990303	0.991867
YEL064C	AVT2	0.979188	0.975415	0.975028	0.978339	0.98374
YEL065W	SIT1	0.899944	0.899951	0.95053	0.937138	0.950461
YEL066W	HPA3	0.990362	0.993706	0.989561	0.992836	0.995039
YEL067C	YEL067C
YEL068C	YEL068C	0.933813	0.968617	0.909972	0.976478	0.969129
YEL069C	HXT13
YEL070W	DSF1
YEL071W	DLD3	0.942909	0.953208	0.966721	0.97192	0.969324
YEL072W	RMD6	0.991473	0.975611	0.993332	0.97957	0.992088
YEL073C	YEL073C	0.959091	0.893471	0.972479	0.974042	0.980859
YEL074W	YEL074W
YEL075C	YEL075C
YEL076C	YEL076C
YEL077C	YEL077C
YER001W	MNN1	0.869654	0.677097	0.881159	0.653572	0.739228
YER002W	NOP16	0.981082	0.989638	0.989159	0.995458	0.994779
YER003C	PMI40	0.963367	0.784728	0.870828	0.836949	0.860872
YER004W	FMP52	0.767525	0.918083	0.891258	0.957694	0.957494
YER005W	YND1	0.942119	0.905727	0.915109	0.89299	0.937416
YER006W	NUG1	0.994584	0.990008	0.995271	0.995422	0.997397
YER007W	PAC2	0.869471	0.947035	0.751255	0.958492	0.941333
YER008C	SEC3	0.933526	0.936251	0.866874	0.802036	0.878109
YER009W	NTF2	0.99416	0.9766	0.995035	0.986592	0.992117
YER010C	YER010C	0.968571	0.874582	0.965507	0.952075	0.976248
YER011W	TIR1	0.980981	0.974922	0.983925	0.974853	0.980969
YER012W	PRE1	0.929925	0.852064	0.857379	0.904126	0.888044
YER013W	PRP22	0.91363	0.962882	0.899414	0.974391	0.971858
YER014W	HEM14	0.963129	0.950263	0.945747	0.957563	0.967838
YER015W	FAA2	0.977829	0.986289	0.98138	0.982663	0.987779
YER016W	BIM1	0.877457	0.790266	0.755213	0.801485	0.818676
YER017C	AFG3	0.904722	0.931692	0.811297	0.942955	0.920766
YER018C	SPC25	0.971636	0.97074	0.979915	0.984094	0.988354
YER019W	ISC1	0.939577	0.927089	0.972813	0.970452	0.984181
YER020W	GPA2	0.988929	0.971133	0.987322	0.971778	0.986164
YER021W	RPN3	0.934518	0.832607	0.941046	0.931715	0.958122
YER022W	SRB4	0.967789	0.925984	0.934698	0.89154	0.934638
YER023W	PRO3	0.791549	0.756038	0.944926	0.831147	0.903708
YER024W	YAT2	0.992015	0.981418	0.987617	0.986259	0.990803
YER025W	GCD11	0.985134	0.990686	0.993043	0.994279	0.994749
YER026C	CHO1	0.983877	0.986624	0.992899	0.992204	0.995584
YER027C	GAL83	0.849357	0.907773	0.943239	0.842208	0.88621
YER028C	MIG3	0.898363	0.965012	0.757555	0.839996	0.849585
YER029C	SMB1	0.829194	0.930105	0.862966	0.944125	0.842646
YER030W	CHZ1	0.861722	0.892349	0.926054	0.931842	0.867281
YER031C	YPT31	0.959875	0.971434	0.905634	0.932442	0.932583
YER032W	FIR1	0.889481	0.92566	0.824545	0.893342	0.897648
YER033C	ZRG8	0.978024	0.980602	0.983881	0.979286	0.987733
YER034W	YER034W	0.923797	0.806319	0.897978	0.821625	0.878261
YER035W	EDC2	0.989646	0.959536	0.988733	0.986502	0.992287
YER036C	ARB1	0.992401	0.992785	0.99502	0.994549	0.995399
YER037W	PHM8	0.995346	0.987368	0.993921	0.991609	0.993882
YER038C	KRE29	0.9634	0.978227	0.947117	0.951932	0.948195
YER039C	HVG1
YER040W	GLN3	0.979334	0.982616	0.979478	0.968805	0.98452
YER041W	YEN1	0.971832	0.937591	0.942419	0.963673	0.970667
YER042W	MXR1	0.980556	0.981277	0.978123	0.986006	0.985256
YER043C	SAH1	0.979384	0.833082	0.956054	0.957705	0.978046
YER044C	ERG28	0.984884	0.726663	0.929326	0.784266	0.886383
YER045C	ACA1	0.944942	0.943844	0.896488	0.9631	0.962114
YER046W	SPO73	0.98274	0.981393	0.983882	0.990623	0.992227
YER047C	SAP1	0.940319	0.95142	0.915741	0.788056	0.906793
YER048C	CAJ1	0.906542	0.892934	0.881847	0.908188	0.922257
YER049W	TPA1	0.993207	0.985466	0.994162	0.996233	0.996107
YER050C	RSM18	0.932569	0.889717	0.944514	0.831502	0.909529
YER051W	JHD1	0.975353	0.978482	0.971939	0.974009	0.983548
YER052C	HOM3	0.979541	0.963027	0.972848	0.978216	0.975953
YER053C	PIC2	0.995917	0.982436	0.994759	0.995743	0.99657
YER054C	GIP2	0.993101	0.896801	0.991887	0.993899	0.995442
YER055C	HIS1	0.872399	0.964558	0.841549	0.962368	0.905477
YER056C	FCY2	0.923679	0.948849	0.872963	0.894821	0.885189
YER057C	HMF1	0.927587	0.975221	0.962907	0.96574	0.977948
YER058W	PET117	0.972157	0.958582	0.952627	0.976903	0.97831
YER059W	PCL6	0.980904	0.965132	0.980875	0.961307	0.98049
YER060W	FCY21	0.897405	0.936347	0.946282	0.96618	0.962657
YER061C	CEM1	0.96524	0.961206	0.978923	0.972848	0.986256
YER062C	GPP2	0.982708	0.834579	0.965404	0.943063	0.96358
YER063W	THO1	0.955351	0.972925	0.969656	0.969936	0.971885
YER064C	VHR2	0.985833	0.990289	0.981279	0.986281	0.989531
YER065C	ICL1	0.979893	0.984013	0.982129	0.982545	0.990414
YER066W	RRT13
YER067W	RGI1	0.989936	0.964068	0.989728	0.989031	0.991563
YER068W	MOT2	0.781971	0.822773	0.864158	0.648258	0.750746
YER069W	ARG5,6	0.994687	0.996316	0.995015	0.993555	0.99518
YER070W	RNR1	0.977341	0.867249	0.964964	0.920661	0.962858
YER071C	TDA2	0.951154	0.958666	0.904495	0.964288	0.962971
YER072W	VTC1	0.957911	0.95046	0.949741	0.93826	0.950686
YER073W	ALD5	0.923679	0.876967	0.838998	0.868102	0.921129
YER074W	RPS24A	0.999082	0.995207	0.999606	0.999009	0.99959
YER075C	PTP3	0.87213	0.891744	0.792385	0.745251	0.821773
YER076C	YER076C	0.958105	0.889686	0.944412	0.643774	0.890654
YER077C	MRX1	0.736524	0.742123	0.782581	0.666274	0.756218
YER078C	ICP55	0.88603	0.862637	0.78177	0.889954	0.882747
YER079W	YER079W	0.995826	0.993711	0.99618	0.996498	0.99707
YER080W	AIM9	0.834612	0.933205	0.887592	0.956431	0.949843
YER081W	SER3	0.990058	0.652257	0.973993	0.957938	0.979178
YER082C	UTP7	0.982931	0.976797	0.99499	0.986112	0.994356
YER083C	GET2	0.916809	0.88805	0.888846	0.86557	0.913189
YER084W	YER084W	0.98387	0.955834	0.985731	0.94727	0.981896
YER085C	YER085C
YER086W	ILV1	0.944921	0.966796	0.926777	0.852541	0.928785
YER087W	AIM10	0.94892	0.846832	0.934111	0.699756	0.894657
YER088C	DOT6	0.962995	0.965513	0.959409	0.971246	0.97524
YER089C	PTC2	0.921749	0.94717	0.880029	0.927405	0.843225
YER090W	TRP2	0.888278	0.843337	0.938044	0.876132	0.921129
YER091C	MET6	0.994197	0.992384	0.995063	0.995126	0.996649
YER092W	IES5	0.96835	0.960838	0.983324	0.979751	0.987636
YER093C	TSC11	0.924173	0.944783	0.941078	0.784642	0.917416
YER094C	PUP3	0.921407	0.911637	0.799932	0.895666	0.849682
YER095W	RAD51	0.924003	0.815665	0.884287	0.745026	0.88379
YER096W	SHC1	0.988826	0.890458	0.977228	0.969659	0.983029
YER097W	YER097W
YER098W	UBP9	0.968005	0.941437	0.979737	0.955425	0.98151
YER099C	PRS2	0.847812	0.797344	0.74706	0.826409	0.80736
YER100W	UBC6	0.810103	0.90778	0.7916	0.769717	0.805067
YER101C	AST2	0.972123	0.946798	0.954483	0.965834	0.9767
YER102W	RPS8B	0.99802	0.997338	0.999153	0.99934	0.99928
YER103W	SSA4	0.98166	0.88751	0.973126	0.922961	0.968585
YER104W	RTT105	0.962911	0.960757	0.968417	0.965384	0.979927
YER105C	NUP157	0.879913	0.916723	0.861786	0.91042	0.865073
YER106W	MAM1
YER107C	GLE2	0.787873	0.911561	0.891616	0.846818	0.910198
YER109C	FLO8
YER110C	KAP123	0.993385	0.983428	0.992755	0.994889	0.994551
YER111C	SWI4	0.824603	0.767547	0.86597	0.8728	0.905732
YER112W	LSM4	0.915749	0.815768	0.861666	0.891453	0.917735
YER113C	TMN3	0.933568	0.92202	0.917893	0.929989	0.94835
YER114C	BOI2	0.903029	0.914896	0.873242	0.821472	0.824525
YER115C	SPR6	0.828611	0.87781	0.74247	0.712209	0.752128
YER116C	SLX8
YER117W	RPL23B	0.999133	0.998777	0.999329	0.999109	0.999402
YER118C	SHO1	0.983047	0.92202	0.975079	0.967405	0.98121
YER119C	AVT6	0.996301	0.992015	0.991415	0.993804	0.995349
YER120W	SCS2	0.93299	0.910205	0.90211	0.898835	0.904415
YER121W	YER121W	0.988623	0.967174	0.987017	0.960001	0.985507
YER122C	GLO3	0.917749	0.793777	0.853691	0.869222	0.883628
YER123W	YCK3	0.672117	0.797394	0.780057	0.796137	0.832296
YER124C	DSE1	0.962017	0.977126	0.973314	0.968914	0.977241
YER125W	RSP5	0.794969	0.753736	0.778494	0.636714	0.783371
YER126C	NSA2	0.979063	0.994713	0.992493	0.996102	0.996331
YER127W	LCP5	0.984402	0.983902	0.992852	0.993588	0.994745
YER128W	VFA1	0.949667	0.981531	0.959265	0.971427	0.980972
YER129W	SAK1	0.947831	0.820901	0.871994	0.704048	0.811264
YER130C	COM2	0.822812	0.847977	0.66359	0.803941	0.805029
YER131W	RPS26B	0.998868	0.997343	0.998831	0.9991	0.9994
YER132C	PMD1	0.902448	0.901498	0.947709	0.914925	0.947108
YER133W	GLC7
YER134C	YER134C	0.915949	0.86237	0.94638	0.680726	0.878683
YER135C	YER135C
YER136W	GDI1	0.923974	0.907046	0.953912	0.893603	0.951055
YER137C	YER137C	0.776474	0.849466	0.905147	0.702481	0.804449
YER138C	YER138C
YER139C	RTR1	0.963985	0.974071	0.970332	0.977336	0.984473
YER140W	EMP65	0.929383	0.954753	0.895813	0.958299	0.964455
YER141W	COX15	0.967763	0.872357	0.970886	0.923938	0.970711
YER142C	MAG1	0.979227	0.967072	0.979127	0.97554	0.985051
YER143W	DDI1	0.960981	0.880011	0.977163	0.945659	0.970832
YER144C	UBP5	0.868076	0.786258	0.880969	0.866768	0.900247
YER145C	FTR1	0.903337	0.972153	0.924932	0.925196	0.916987
YER146W	LSM5	0.948358	0.914667	0.93014	0.935212	0.941532
YER147C	SCC4	0.958404	0.740228	0.942276	0.595822	0.858419
YER148W	SPT15	0.95315	0.900238	0.937946	0.954324	0.964441
YER149C	PEA2	0.939061	0.868915	0.876273	0.760228	0.854101
YER150W	SPI1	0.993061	0.980622	0.985463	0.995784	0.994373
YER151C	UBP3	0.960556	0.866866	0.936723	0.969526	0.959362
YER152C	YER152C	0.97891	0.990396	0.988773	0.994663	0.994049
YER153C	PET122
YER154W	OXA1	0.936329	0.863679	0.954294	0.922386	0.961392
YER155C	BEM2	0.800084	0.840697	0.679118	0.761576	0.763075
YER156C	YER156C	0.994182	0.978019	0.993887	0.991396	0.995175
YER157W	COG3	0.92255	0.941373	0.8854	0.965938	0.958555
YER158C	YER158C	0.989909	0.961738	0.987863	0.975441	0.989262
YER159C	BUR6	0.977122	0.979764	0.965983	0.953118	0.966697
YER160C	YER160C
YER161C	SPT2	0.783229	0.760902	0.760277	0.649911	0.74292
YER162C	RAD4	0.989023	0.973236	0.985881	0.972155	0.987771
YER163C	GCG1	0.928008	0.917596	0.971614	0.931557	0.968562
YER164W	CHD1	0.883093	0.897821	0.837708	0.819771	0.849647
YER165W	PAB1	0.991755	0.986659	0.993043	0.99586	0.993835
YER166W	DNF1	0.951097	0.974859	0.880119	0.852352	0.889439
YER167W	BCK2	0.916908	0.806795	0.752491	0.751596	0.785679
YER168C	CCA1	0.915816	0.93431	0.893911	0.92825	0.936478
YER169W	RPH1	0.974971	0.876715	0.924248	0.849547	0.899304
YER170W	ADK2	0.867088	0.957612	0.936577	0.953342	0.966497
YER171W	RAD3	0.915047	0.845043	0.91098	0.815304	0.897068
YER172C	BRR2	0.941078	0.936053	0.776011	0.849547	0.78135
YER173W	RAD24	0.907477	0.91366	0.914526	0.751987	0.889024
YER174C	GRX4	0.957891	0.972187	0.931484	0.982403	0.974129
YER175C	TMT1	0.995256	0.983471	0.994199	0.991571	0.992901
YER176W	ECM32	0.915277	0.926583	0.865721	0.83756	0.866907
YER177W	BMH1	0.94381	0.825228	0.948812	0.959228	0.962014
YER178W	PDA1	0.9145	0.910681	0.965526	0.951256	0.973969
YER179W	DMC1
YER180C	ISC10	0.898819	0.93652	0.901514	0.938704	0.948458
YER181C	YER181C
YER182W	FMP10	0.965849	0.823052	0.968681	0.937639	0.971091
YER183C	FAU1	0.822219	0.942757	0.830543	0.962314	0.922131
YER184C	TOG1
YER185W	PUG1	0.97944	0.951801	0.948818	0.919744	0.959104
YER186C	YER186C
YER187W	YER187W
YER188W	YER188W
YER189W	YER189W
YER190W	YRF1-2
YFL001W	DEG1	0.963492	0.947383	0.976695	0.980478	0.986213
YFL002C	SPB4	0.909827	0.95815	0.952487	0.971296	0.975109
YFL003C	MSH4
YFL004W	VTC2	0.838354	0.980902	0.938747	0.976557	0.969002
YFL005W	SEC4	0.85466	0.865654	0.935914	0.867307	0.933958
YFL007W	BLM10	0.850453	0.860363	0.759425	0.861868	0.840976
YFL008W	SMC1	0.892612	0.947872	0.853279	0.864468	0.88513
YFL009W	CDC4	0.938889	0.878658	0.9054	0.908111	0.930566
YFL010C	WWM1	0.939116	0.979211	0.965664	0.973507	0.973758
YFL011W	HXT10
YFL012W	YFL012W
YFL013C	IES1	0.988061	0.972157	0.969839	0.973636	0.979588
YFL014W	HSP12	0.998144	0.865149	0.994315	0.996013	0.996236
YFL015C	YFL015C
YFL016C	MDJ1	0.854745	0.920081	0.757649	0.885447	0.842283
YFL017C	GNA1	0.862965	0.845788	0.851548	0.763423	0.772365
YFL018C	LPD1	0.918989	0.949286	0.967519	0.989505	0.983543
YFL019C	YFL019C
YFL020C	PAU5
YFL021W	GAT1	0.992936	0.994053	0.993661	0.993812	0.996151
YFL022C	FRS2	0.991825	0.994342	0.996602	0.994706	0.995422
YFL023W	BUD27	0.987428	0.973468	0.986385	0.985546	0.989891
YFL024C	EPL1	0.905257	0.862614	0.846075	0.723867	0.864375
YFL025C	BST1	0.795205	0.829054	0.636231	0.647471	0.708679
YFL026W	STE2	0.980357	0.97663	0.97058	0.966023	0.981325
YFL027C	GYP8	0.970614	0.980823	0.950658	0.982463	0.983379
YFL028C	CAF16	0.986914	0.9609	0.974319	0.962295	0.975876
YFL029C	CAK1	0.94246	0.895014	0.955482	0.940767	0.966783
YFL030W	AGX1	0.995576	0.988986	0.993665	0.994857	0.995993
YFL031W	HAC1	0.891007	0.918427	0.942497	0.941809	0.956098
YFL032W	YFL032W
YFL033C	RIM15	0.983592	0.991551	0.970662	0.983463	0.987834
YFL034W	MIL1	0.92368	0.927997	0.92675	0.899796	0.937116
YFL036W	RPO41	0.895837	0.905484	0.801317	0.801771	0.829122
YFL037W	TUB2	0.977067	0.937083	0.884153	0.835855	0.879743
YFL038C	YPT1	0.930925	0.964375	0.967129	0.981972	0.975597
YFL039C	ACT1	0.958825	0.89131	0.940778	0.910394	0.9381
YFL040W	YFL040W
YFL041W	FET5	0.831736	0.806019	0.891035	0.824008	0.875841
YFL042C	LAM5	0.989673	0.964201	0.988508	0.974237	0.989249
YFL044C	OTU1
YFL045C	SEC53	0.99416	0.984596	0.987249	0.994846	0.992884
YFL046W	FMP32	0.964863	0.821894	0.960005	0.813594	0.924638
YFL047W	RGD2	0.833334	0.937056	0.607548	0.787364	0.747027
YFL048C	EMP47	0.893426	0.924076	0.802096	0.838677	0.731804
YFL049W	SWP82	0.952479	0.878999	0.943284	0.907811	0.93894
YFL050C	ALR2	0.958393	0.953102	0.93468	0.948033	0.965141
YFL051C	YFL051C
YFL052W	ZNF1
YFL053W	DAK2
YFL054C	AQY3	0.991618	0.939282	0.986914	0.890782	0.978113
YFL055W	AGP3	0.985971	0.984749	0.989343	0.98956	0.994212
YFL056C	AAD6
YFL057C	AAD16
YFL058W	THI5
YFL059W	SNZ3
YFL060C	SNO3
YFL061W	DDI2
YFL062W	COS4
YFL063W	YFL063W
YFL064C	YFL064C
YFL065C	YFL065C
YFL066C	YFL066C
YFL067W	YFL067W
YFL068W	YFL068W
YFR001W	LOC1	0.986344	0.989638	0.992584	0.991724	0.994972
YFR002W	NIC96	0.840717	0.829091	0.841733	0.803872	0.847719
YFR003C	YPI1	0.979188	0.938787	0.984587	0.97723	0.986613
YFR004W	RPN11	0.800158	0.87412	0.85087	0.879812	0.88997
YFR005C	SAD1	0.851635	0.860856	0.941349	0.718301	0.907269
YFR006W	YFR006W	0.785794	0.782636	0.738245	0.694248	0.730502
YFR007W	YFH7	0.927204	0.979549	0.918825	0.987813	0.980252
YFR008W	FAR7	0.977313	0.968371	0.971465	0.977699	0.983831
YFR009W	GCN20	0.979288	0.959362	0.957207	0.971706	0.972119
YFR010W	UBP6	0.852386	0.741092	0.828758	0.887694	0.886669
YFR011C	MIC19	0.889251	0.923529	0.911402	0.962512	0.961916
YFR012W	DCV1
YFR013W	IOC3	0.86744	0.829052	0.811692	0.89733	0.909622
YFR014C	CMK1	0.98518	0.977537	0.986826	0.987956	0.990809
YFR015C	GSY1	0.992476	0.95629	0.991304	0.992509	0.995396
YFR016C	AIP5	0.900896	0.976052	0.9325	0.965567	0.967514
YFR017C	IGD1	0.992652	0.970314	0.994728	0.995883	0.996905
YFR018C	YFR018C	0.883225	0.86297	0.674485	0.831842	0.756492
YFR019W	FAB1	0.977446	0.961145	0.982857	0.909724	0.972418
YFR020W	CSS2	0.969145	0.98252	0.907138	0.991692	0.981677
YFR021W	ATG18	0.935984	0.885887	0.921944	0.949083	0.95569
YFR022W	ROG3	0.981791	0.977776	0.98038	0.976651	0.986666
YFR023W	PES4
YFR025C	HIS2	0.981751	0.985221	0.989961	0.989147	0.992714
YFR026C	ULI1
YFR027W	ECO1	0.793273	0.75899	0.828436	0.795875	0.881084
YFR028C	CDC14	0.944196	0.872835	0.891279	0.88968	0.910699
YFR029W	PTR3	0.966218	0.978721	0.96995	0.968227	0.982342
YFR030W	MET10	0.995795	0.994349	0.996547	0.996309	0.997731
YFR031C	SMC2	0.920889	0.931077	0.881945	0.761192	0.837393
YFR032C	RRT5
YFR033C	QCR6	0.957414	0.93574	0.963475	0.956992	0.967033
YFR034C	PHO4	0.933499	0.941055	0.910728	0.941493	0.946334
YFR035C	YFR035C
YFR036W	CDC26	0.911601	0.72307	0.934916	0.741569	0.816236
YFR037C	RSC8	0.921172	0.928957	0.752793	0.878168	0.842909
YFR038W	IRC5	0.878731	0.810944	0.727704	0.744467	0.762568
YFR039C	OSW7	0.954065	0.930149	0.933851	0.86053	0.934831
YFR040W	SAP155	0.881956	0.935471	0.757759	0.77506	0.79438
YFR041C	ERJ5	0.823671	0.86597	0.899084	0.861025	0.915075
YFR042W	KEG1	0.948029	0.890351	0.965713	0.96295	0.975281
YFR043C	IRC6	0.952629	0.75054	0.947792	0.830941	0.935645
YFR044C	DUG1	0.818144	0.919892	0.795069	0.91749	0.839437
YFR045W	YFR045W	0.936435	0.873956	0.930709	0.971744	0.970368
YFR046C	CNN1	0.959715	0.952778	0.952978	0.961615	0.971571
YFR047C	BNA6	0.988785	0.983423	0.985808	0.984804	0.990598
YFR048W	RMD8	0.795486	0.832126	0.774445	0.732356	0.80475
YFR049W	YMR31	0.984044	0.981766	0.99219	0.991194	0.993745
YFR050C	PRE4	0.878215	0.818752	0.775622	0.858718	0.82389
YFR051C	RET2	0.968649	0.726308	0.967961	0.909855	0.920296
YFR052W	RPN12	0.852032	0.7663	0.830995	0.853246	0.863915
YFR053C	HXK1	0.984724	0.915578	0.994806	0.989757	0.993465
YFR054C	YFR054C
YFR055W	IRC7	0.936488	0.902719	0.787604	0.921921	0.904915
YFR056C	YFR056C
YFR057W	YFR057W
YGL001C	ERG26	0.914043	0.93771	0.933267	0.929352	0.92672
YGL002W	ERP6	0.973809	0.945678	0.968311	0.945196	0.976558
YGL003C	CDH1	0.976732	0.949511	0.950818	0.959051	0.973374
YGL004C	RPN14	0.943993	0.920471	0.930977	0.948314	0.967501
YGL005C	COG7	0.968564	0.868419	0.964282	0.848816	0.952044
YGL006W	PMC1	0.992183	0.985764	0.993601	0.989775	0.995114
YGL007W	BRP1
YGL008C	PMA1	0.964556	0.744132	0.912373	0.937268	0.935059
YGL009C	LEU1	0.901295	0.94259	0.850554	0.741454	0.79418
YGL010W	MPO1	0.989529	0.909979	0.982018	0.952677	0.982245
YGL011C	SCL1	0.89055	0.867809	0.795126	0.912068	0.85662
YGL012W	ERG4	0.968465	0.830373	0.90692	0.960643	0.956668
YGL013C	PDR1	0.825676	0.763865	0.754718	0.771092	0.796756
YGL014W	PUF4	0.935962	0.937603	0.959041	0.983594	0.982554
YGL015C	YGL015C
YGL016W	KAP122	0.986878	0.944398	0.979127	0.978369	0.983824
YGL017W	ATE1	0.92394	0.820038	0.902511	0.917587	0.935367
YGL018C	JAC1	0.910774	0.737204	0.922896	0.862087	0.925891
YGL019W	CKB1	0.942846	0.884439	0.90211	0.87988	0.91461
YGL020C	GET1	0.962713	0.892555	0.919037	0.914993	0.915273
YGL021W	ALK1	0.954652	0.973984	0.975959	0.965336	0.979939
YGL022W	STT3	0.987718	0.921368	0.974876	0.97688	0.97972
YGL023C	PIB2	0.957343	0.971123	0.936839	0.941264	0.951589
YGL024W	YGL024W
YGL025C	PGD1	0.846029	0.839129	0.949169	0.911682	0.958031
YGL026C	TRP5	0.909301	0.970795	0.971974	0.978216	0.97641
YGL027C	CWH41	0.939972	0.939978	0.86724	0.923461	0.913046
YGL028C	SCW11	0.909551	0.956301	0.893105	0.935454	0.925503
YGL029W	CGR1	0.989336	0.990916	0.995441	0.996728	0.997159
YGL030W	RPL30	0.999218	0.998769	0.999339	0.999519	0.999602
YGL031C	RPL24A	0.999218	0.998026	0.999164	0.999268	0.999438
YGL032C	AGA2	0.954628	0.969177	0.963302	0.952889	0.971833
YGL033W	HOP2
YGL034C	YGL034C
YGL035C	MIG1	0.953087	0.88564	0.935654	0.894821	0.865452
YGL036W	YGL036W	0.862602	0.904891	0.746731	0.718684	0.750468
YGL037C	PNC1	0.992627	0.936853	0.996562	0.995632	0.997102
YGL038C	OCH1	0.97809	0.828047	0.973801	0.98208	0.985083
YGL039W	YGL039W	0.908912	0.854027	0.843073	0.881217	0.892244
YGL040C	HEM2	0.772538	0.942047	0.889761	0.914593	0.914624
YGL041C	YGL041C
YGL042C	YGL042C
YGL043W	DST1	0.947215	0.972369	0.945144	0.983176	0.981525
YGL044C	RNA15	0.662926	0.809721	0.744638	0.714156	0.726637
YGL045W	RIM8	0.982049	0.956735	0.981226	0.959158	0.983254
YGL047W	ALG13	0.928008	0.879465	0.953183	0.979676	0.97738
YGL048C	RPT6	0.914257	0.949903	0.915681	0.913604	0.931148
YGL049C	TIF4632	0.859493	0.963194	0.919532	0.91924	0.942766
YGL050W	TYW3	0.556214	0.810439	0.581413	0.820058	0.798124
YGL051W	MST27
YGL052W	YGL052W
YGL053W	PRM8
YGL054C	ERV14	0.940663	0.874688	0.85307	0.923086	0.916386
YGL055W	OLE1	0.901295	0.904127	0.876116	0.797364	0.875446
YGL056C	SDS23	0.807322	0.75012	0.829913	0.667285	0.772912
YGL057C	GEP7	0.94235	0.870114	0.930594	0.626703	0.884435
YGL058W	RAD6	0.883325	0.751011	0.935833	0.775749	0.917789
YGL059W	PKP2	0.994056	0.979172	0.994142	0.992311	0.995032
YGL060W	YBP2	0.821721	0.619784	0.831236	0.6839	0.826294
YGL061C	DUO1	0.711566	0.89426	0.745682	0.824471	0.830613
YGL062W	PYC1	0.989097	0.990028	0.990136	0.989318	0.993291
YGL063W	PUS2
YGL064C	MRH4	0.931109	0.941353	0.946272	0.904046	0.954534
YGL065C	ALG2	0.817165	0.860029	0.863457	0.849505	0.811457
YGL066W	SGF73	0.898676	0.964314	0.945107	0.960181	0.968236
YGL067W	NPY1	0.909466	0.858368	0.82492	0.898875	0.854085
YGL068W	MNP1	0.93867	0.972867	0.948495	0.95908	0.960468
YGL069C	YGL069C
YGL070C	RPB9	0.908086	0.812824	0.875147	0.814358	0.892346
YGL071W	AFT1	0.888029	0.892334	0.75103	0.610009	0.698209
YGL072C	YGL072C
YGL073W	HSF1	0.95973	0.953385	0.96976	0.945632	0.968585
YGL074C	YGL074C
YGL075C	MPS2	0.828009	0.949007	0.851867	0.931344	0.935903
YGL076C	RPL7A
YGL077C	HNM1	0.961742	0.988478	0.984052	0.98704	0.988877
YGL078C	DBP3	0.996547	0.991719	0.996498	0.996813	0.997951
YGL079W	KXD1	0.891808	0.920707	0.851541	0.897804	0.914221
YGL080W	MPC1	0.911275	0.840442	0.885375	0.92874	0.926513
YGL081W	YGL081W	0.969051	0.969699	0.97301	0.989795	0.989797
YGL082W	YGL082W	0.917302	0.953637	0.971157	0.972409	0.981791
YGL083W	SCY1	0.911036	0.833036	0.759072	0.876002	0.763768
YGL084C	GUP1	0.834612	0.876364	0.909506	0.784961	0.873439
YGL085W	LCL3	0.920657	0.860292	0.896442	0.929555	0.947046
YGL086W	MAD1	0.796154	0.840233	0.701429	0.87262	0.835906
YGL087C	MMS2	0.993296	0.978006	0.994194	0.983112	0.992117
YGL088W	YGL088W
YGL089C	MF(ALPHA)2
YGL090W	LIF1	0.979418	0.984545	0.935631	0.976171	0.976819
YGL091C	NBP35	0.965202	0.913545	0.960661	0.961726	0.97254
YGL092W	NUP145	0.957827	0.887927	0.939454	0.903981	0.929155
YGL093W	SPC105	0.979075	0.978203	0.977479	0.971388	0.985028
YGL094C	PAN2	0.853665	0.852326	0.714914	0.836067	0.812675
YGL095C	VPS45	0.975191	0.96508	0.968547	0.966807	0.980116
YGL096W	TOS8	0.991598	0.992945	0.99439	0.994197	0.995644
YGL097W	SRM1	0.985761	0.863521	0.977555	0.927131	0.959762
YGL098W	USE1
YGL099W	LSG1	0.994019	0.994789	0.99426	0.995668	0.996256
YGL100W	SEH1	0.859031	0.867452	0.88954	0.852226	0.896081
YGL101W	YGK1	0.881038	0.951167	0.94076	0.915252	0.944172
YGL102C	YGL102C
YGL103W	RPL28	0.998845	0.998309	0.999148	0.999425	0.99944
YGL104C	VPS73	0.987681	0.912611	0.976768	0.96748	0.982732
YGL105W	ARC1	0.993741	0.971853	0.991077	0.986576	0.987644
YGL106W	MLC1	0.950148	0.839173	0.934366	0.890748	0.906736
YGL107C	RMD9
YGL108C	YGL108C	0.760293	0.949832	0.84837	0.94541	0.945665
YGL109W	YGL109W
YGL110C	CUE3	0.935374	0.969168	0.676218	0.918986	0.877293
YGL111W	NSA1	0.987018	0.991098	0.992222	0.993885	0.994927
YGL112C	TAF6	0.880303	0.843859	0.888604	0.783006	0.865645
YGL113W	SLD3	0.879219	0.903736	0.741545	0.822325	0.810184
YGL114W	YGL114W	0.967244	0.97563	0.95793	0.987357	0.98458
YGL115W	SNF4	0.890654	0.891489	0.873991	0.942917	0.929838
YGL116W	CDC20	0.839251	0.779603	0.873777	0.802394	0.855282
YGL117W	YGL117W	0.990966	0.947953	0.992837	0.985675	0.992887
YGL118C	YGL118C
YGL119W	COQ8	0.741079	0.945355	0.611116	0.948798	0.911249
YGL120C	PRP43	0.994794	0.98756	0.996853	0.996655	0.99794
YGL121C	GPG1	0.995912	0.971463	0.99433	0.984714	0.993965
YGL122C	NAB2	0.944053	0.940824	0.936604	0.958327	0.965711
YGL123W	RPS2	0.998906	0.998725	0.999305	0.999272	0.999428
YGL124C	MON1	0.993666	0.992778	0.983608	0.990643	0.992229
YGL125W	MET13	0.988269	0.989059	0.990205	0.993993	0.992815
YGL126W	SCS3	0.914593	0.850459	0.832267	0.857918	0.765027
YGL127C	SOH1	0.925523	0.932478	0.92888	0.975343	0.962093
YGL128C	CWC23	0.9708	0.88547	0.971806	0.869589	0.955899
YGL129C	RSM23	0.694552	0.927897	0.819006	0.904397	0.889611
YGL130W	CEG1	0.957529	0.926354	0.936823	0.895788	0.934658
YGL131C	SNT2
YGL132W	YGL132W
YGL133W	ITC1	0.839309	0.820381	0.718736	0.728092	0.77201
YGL134W	PCL10	0.899574	0.966287	0.905047	0.936718	0.948518
YGL135W	RPL1B	0.997879	0.996963	0.998367	0.998696	0.998855
YGL136C	MRM2	0.969573	0.849466	0.95987	0.725183	0.885999
YGL137W	SEC27	0.961431	0.853981	0.873771	0.913187	0.908452
YGL138C	YGL138C
YGL139W	FLC3	0.934621	0.858328	0.731572	0.789255	0.820654
YGL140C	YGL140C	0.963886	0.981258	0.968423	0.949546	0.977596
YGL141W	HUL5	0.982527	0.96585	0.975676	0.969776	0.982193
YGL142C	GPI10	0.950883	0.879461	0.917586	0.902318	0.926869
YGL143C	MRF1	0.933935	0.883623	0.881979	0.92951	0.94222
YGL144C	ROG1	0.940666	0.916371	0.818783	0.871186	0.895936
YGL145W	TIP20	0.812662	0.750907	0.703382	0.850226	0.818033
YGL146C	RRT6	0.95689	0.813537	0.956897	0.912396	0.968014
YGL147C	RPL9A	0.9981	0.997702	0.997	0.999261	0.998711
YGL148W	ARO2	0.992515	0.882124	0.986456	0.947596	0.978046
YGL149W	YGL149W
YGL150C	INO80	0.868706	0.885841	0.6851	0.756906	0.752128
YGL151W	NUT1	0.880577	0.825546	0.868629	0.781261	0.810902
YGL152C	YGL152C
YGL153W	PEX14	0.941334	0.978407	0.976268	0.97399	0.984559
YGL154C	LYS5	0.985078	0.947414	0.985287	0.938105	0.980786
YGL155W	CDC43	0.851635	0.771534	0.826872	0.804174	0.670423
YGL156W	AMS1	0.992016	0.990546	0.994257	0.995722	0.995793
YGL157W	ARI1	0.774038	0.858514	0.893283	0.873394	0.894531
YGL158W	RCK1
[truncated: 4,651 more rows]

## Sheet: cross_NN_top_of_5_corr
ORF	GeneName	cer_by_par	par_by_cer	hyc_by_hyp	hyp_by_hyc	cer_by_hyc	hyc_by_cer	par_by_hyp	hyp_by_par	cer_by_hyp	hyp_by_cer	par_by_hyc	hyc_by_par
YAL001C	TFC3	0.969882	0.958594	0.970604	0.957321	0.969092	0.972962	0.96004	0.953691	0.973926	0.95478	0.960858	0.97389
YAL002W	VPS8	0.982934	0.983319	0.963711	0.972524	0.969754	0.966512	0.983623	0.979232	0.972722	0.974856	0.958815	0.963466
YAL003W	EFB1	0.986578	0.984727	0.998261	0.998629	0.993183	0.997368	0.97529	0.994578	0.997631	0.99809	0.976854	0.996179
YAL004W	YAL004W
YAL005C	SSA1	0.943014	0.84655	0.806961	0.7898	0.943014	0.958485	0.818576	0.670918	0.822014	0.7898	0.84655	0.958485
YAL007C	ERP2	0.949257	0.285821	0.948905	0.949216	0.948098	0.900308	0.504669	0.936763	0.964587	0.946661	0.504669	0.944327
YAL008W	FUN14	0.949262	0.932856	0.982565	0.988653	0.972615	0.984398	0.970726	0.988213	0.959065	0.986274	0.941794	0.974876
YAL009W	SPO7	0.871999	0.919283	0.943731	0.889282	0.938401	0.955523	0.906395	0.889093	0.938861	0.913608	0.932166	0.93128
YAL010C	MDM10	0.835199	0.843488	0.87181	0.683537	0.890267	0.857891	0.844914	0.706126	0.90175	0.667537	0.738343	0.842717
YAL011W	SWC3	0.228601	0.842938	0.647854	0.574901	0.60099	0.582389	0.928709	0.656694	0.4426	0.536427	0.870423	0.619133
YAL012W	CYS3	0.938068	0.957539	0.881058	0.971391	0.938068	0.892442	0.957539	0.971391	0.938068	0.971391	0.957539	0.881058
YAL013W	DEP1	0.870439	0.946786	0.950638	0.950749	0.915004	0.941901	0.954926	0.956572	0.906213	0.932194	0.939543	0.946168
YAL014C	SYN8	0.835222	0.893785	0.91277	0.927728	0.871869	0.906533	0.899717	0.921786	0.85022	0.928634	0.924338	0.904557
YAL015C	NTG1	0.926822	0.861221	0.946302	0.897407	0.943984	0.949301	0.912969	0.893802	0.860481	0.899761	0.860782	0.943547
YAL016W	TPD3	0.514566	0.829689	0.953919	0.899176	0.81044	0.930732	0.843328	0.806617	0.747948	0.869274	0.774973	0.838376
YAL017W	PSK1	0.973404	0.970116	0.988627	0.984532	0.987851	0.988944	0.981089	0.987343	0.988061	0.986735	0.946707	0.978512
YAL018C	LDS1	0.675271	0.832497	0.385965	0.120054	0.914557	0.891154	0.272118	0.338376	0.522021	0.120054	0.832497	0.552059
YAL019W	FUN30	0.963769	0.832497	0.978635	0.985132	0.982381	0.973439	0.889202	0.961876	0.980417	0.976241	0.845942	0.967382
YAL020C	ATS1
YAL021C	CCR4	0.680059	0.82755	0.590566	0.617761	0.675385	0.627922	0.844971	0.81298	0.645605	0.653797	0.730546	0.524578
YAL022C	FUN26	0.761253	0.882005	0.868871	0.941995	0.845122	0.872496	0.939713	0.958018	0.649323	0.883968	0.911871	0.890923
YAL023C	PMT2	0.984441	0.489473	0.985338	0.987101	0.984641	0.983458	0.619226	0.957293	0.983386	0.959016	0.41594	0.982675
YAL024C	LTE1	0.781497	0.921448	0.596458	0.738811	0.69277	0.540936	0.913589	0.648912	0.628133	0.718742	0.858801	0.520035
YAL025C	MAK16	0.981889	0.962725	0.994019	0.992499	0.991138	0.991918	0.947969	0.994213	0.981703	0.994819	0.945798	0.992721
YAL026C	DRS2	0.724444	0.853692	0.443439	0.765135	0.699568	0.696716	0.893492	0.749194	0.616302	0.738443	0.87997	0.388766
YAL027W	SAW1	0.810831	0.810512	0.906179	0.921306	0.910852	0.912558	0.790792	0.887239	0.864735	0.922661	0.831817	0.853505
YAL028W	FRT2	0.984095	0.967618	0.972254	0.983127	0.989113	0.975805	0.98522	0.988444	0.978795	0.984697	0.973064	0.972254
YAL029C	MYO4	0.786912	0.633929	0.953455	0.879292	0.896471	0.945729	0.560577	0.868437	0.885155	0.886832	0.509896	0.563407
YAL030W	SNC1	0.968868	0.937516	0.988168	0.977524	0.965935	0.986041	0.975063	0.983779	0.973241	0.970182	0.911141	0.980457
YAL031C	GIP4	0.946374	0.932181	0.96701	0.970755	0.944331	0.975128	0.964137	0.970706	0.944725	0.962075	0.951895	0.969593
YAL032C	PRP45	0.786625	0.655187	0.103194	-0.344372	0.92157	0.901868	0.629748	0.797063	0.408329	-0.435523	0.610865	0.810165
YAL033W	POP5	0.688676	0.83265	0.685351	0.870291	0.859635	0.766069	0.787705	0.844065	0.67547	0.870291	0.80904	0.647768
YAL034C	FUN19	0.973404	0.982929	0.971823	0.988146	0.980262	0.970285	0.983616	0.989398	0.973845	0.987252	0.963972	0.970652
YAL035W	FUN12	0.98742	0.970507	0.993025	0.989549	0.985518	0.993506	0.986301	0.994146	0.986223	0.988815	0.984257	0.994296
YAL036C	RBG1	0.989092	0.960116	0.992721	0.991998	0.993216	0.990573	0.976561	0.990818	0.992145	0.992455	0.976158	0.987062
YAL037W	YAL037W	0.91002	0.957125	0.655209	0.888809	0.87141	0.632358	0.954846	0.926206	0.827846	0.926206	0.914165	0.62746
YAL038W	CDC19	0.990548	0.98678	0.996313	0.996496	0.990548	0.996313	0.98678	0.996496	0.991553	0.996496	0.98678	0.996313
YAL039C	CYC3	0.718131	0.731418	0.847246	0.892108	0.950543	0.744656	0.885143	0.81862	0.904993	0.817868	0.74249	0.780362
YAL040C	CLN3	0.855063	0.867193	0.940952	0.905378	0.849586	0.901177	0.641678	0.831163	0.76516	0.900355	0.683875	0.884044
YAL041W	CDC24	0.815001	0.789555	0.509904	0.488139	0.617775	0.7821	0.651241	0.631078	0.581653	0.540602	0.836965	0.827053
YAL042W	ERV46	0.855703	0.403797	0.934167	0.918399	0.976032	0.948808	0.649864	0.876278	0.923871	0.921229	0.64686	0.913174
YAL043C	PTA1	0.665072	0.84883	0.663563	0.78328	0.882568	0.768839	0.78706	0.848493	0.782096	0.78328	0.84883	0.485167
YAL044C	GCV3	0.953048	0.961928	0.981342	0.978091	0.961609	0.98148	0.978084	0.987018	0.950812	0.981721	0.956343	0.991007
YAL045C	YAL045C
YAL046C	BOL3	0.675407	0.891722	0.865617	0.909885	0.738578	0.825414	0.818108	0.905734	0.652016	0.916868	0.842683	0.835404
YAL047C	SPC72	0.725128	0.852801	0.838302	0.763054	0.695556	0.844906	0.884312	0.79088	0.731237	0.797708	0.893804	0.857978
YAL048C	GEM1
YAL049C	AIM2	0.982858	0.937516	0.965363	0.93524	0.970056	0.973229	0.858702	0.967763	0.923951	0.967763	0.788002	0.966813
YAL051W	OAF1	0.843632	0.897817	0.849423	0.824206	0.886267	0.858539	0.905977	0.854969	0.891238	0.855504	0.913978	0.829548
YAL053W	FLC2	0.896632	0.874813	0.82533	0.81962	0.864146	0.868462	0.886199	0.854969	0.898179	0.822553	0.881342	0.874774
YAL054C	ACS1	0.96996	0.974607	0.972342	0.97772	0.962087	0.971982	0.963513	0.977799	0.96996	0.981949	0.966269	0.974589
YAL055W	PEX22	0.946658	0.929755	0.965744	0.941477	0.980787	0.973306	0.954682	0.95208	0.968768	0.941477	0.911924	0.968398
YAL056W	GPB2	0.98569	0.982403	0.984586	0.989216	0.973193	0.982144	0.968348	0.989216	0.976828	0.983865	0.98193	0.986747
YAL058W	CNE1	0.650118	0.806864	0.614872	0.718442	0.824289	0.760734	0.835131	0.691853	0.663056	0.752822	0.806864	0.542552
YAL059W	ECM1	0.95468	0.966974	0.984207	0.983235	0.976264	0.985689	0.973958	0.976646	0.981193	0.983132	0.969951	0.981927
YAL060W	BDH1	0.983456	0.969499	0.993319	0.994636	0.988884	0.993615	0.988884	0.995652	0.981329	0.989004	0.981486	0.992646
YAL061W	BDH2	0.988722	0.988743	0.993604	0.996707	0.996488	0.994611	0.988743	0.995571	0.996124	0.996707	0.988743	0.990401
YAL062W	GDH3	0.961881	0.982784	0.993542	0.993715	0.992361	0.992445	0.979637	0.984614	0.994393	0.993714	0.969957	0.983387
YAL063C	FLO9
YAL064W	YAL064W
YAL065C	YAL065C
YAL066W	YAL066W
YAL067C	SEO1	0.992061	0.995435	0.994984	0.995363	0.99453	0.995236	0.995435	0.995363	0.992066	0.995363	0.995435	0.994984
YAL068C	PAU8
YAL069W	YAL069W
YAR002W	NUP60	0.852193	0.817935	0.908172	0.827816	0.928533	0.94648	0.628566	0.819031	0.882583	0.831677	0.817935	0.751807
YAR003W	SWD1	0.79511	0.668604	0.959633	0.944935	0.861796	0.956547	0.730241	0.92708	0.921307	0.936073	0.730241	0.939961
YAR007C	RFA1	0.424379	0.805322	0.572249	0.693713	0.527576	0.549348	0.907328	0.690125	0.628493	0.75939	0.855197	0.588216
YAR008W	SEN34	0.0291794	-0.0991222	-0.122236	0.517761	0.866884	0.859193	0.815449	0.769852	0.22355	0.180722	0.727437	-0.277256
YAR009C	YAR009C
YAR010C	YAR010C
YAR014C	BUD14	0.832682	0.692551	0.547648	0.645632	0.708532	0.655123	0.381439	0.0860449	0.685045	0.581353	0.773385	0.369528
YAR015W	ADE1	0.826441	0.936084	0.942148	0.959636	0.86169	0.88398	0.965165	0.910255	0.86169	0.74201	0.937761	0.899426
YAR018C	KIN3	0.690958	0.906255	0.87891	0.866367	0.698232	0.842591	0.945406	0.861331	0.718641	0.869635	0.91068	0.849201
YAR019C	CDC15	0.882578	0.905398	0.950151	0.927393	0.954201	0.943313	0.9012	0.871833	0.937982	0.924836	0.895247	0.917443
YAR020C	PAU7
YAR023C	YAR023C
YAR027W	UIP3	0.964442	0.875122	0.959143	0.936018	0.970026	0.96828	0.940782	0.947331	0.948454	0.932233	0.894093	0.964438
YAR028W	YAR028W
YAR029W	YAR029W
YAR030C	YAR030C
YAR031W	PRM9
YAR033W	MST28	0.477363	0.395821	0.754021	0.767709	0.693745	0.767209	0.754047	0.734542	0.595952	0.78213	0.858239	0.690767
YAR035W	YAT1	0.940303	0.944034	0.980803	0.971973	0.943786	0.980803	0.944034	0.971973	0.940303	0.971973	0.944034	0.980803
YAR042W	SWH1	0.811839	0.90717	0.861231	0.699482	0.780046	0.795251	0.883227	0.609089	0.632453	0.453059	0.823586	0.795251
YAR047C	YAR047C
YAR050W	FLO1	0.142788	-0.249639	-0.853663	-0.777961	-0.739561	-0.875035	-0.727509	-0.757028	0.795745	0.883507	0.898908	0.938558
YAR053W	YAR053W
YAR060C	YAR060C
YAR061W	YAR061W
YAR062W	YAR062W
YAR064W	YAR064W
YAR066W	YAR066W
YAR068W	YAR068W
YAR069C	YAR069C
YAR070C	YAR070C
YAR071W	PHO11
YAR073W	IMD1
YAR075W	YAR075W
YBL001C	ECM15	0.894788	0.910116	0.986456	0.961856	0.979043	0.990791	0.92397	0.939725	0.980028	0.977277	0.896891	0.953234
YBL002W	HTB2	0.966721	0.904243	0.962623	0.963374	0.966721	0.962623	0.904243	0.963374	0.966721	0.963374	0.904243	0.962623
YBL003C	HTA2	0.966721	0.904243	0.962623	0.963374	0.966721	0.962623	0.904243	0.963374	0.966721	0.963374	0.904243	0.962623
YBL004W	UTP20	0.976375	0.952237	0.987508	0.987252	0.979482	0.987508	0.952237	0.983712	0.979482	0.987252	0.959792	0.983555
YBL005W	PDR3
YBL006C	LDB7	0.926969	0.880913	0.954148	0.956764	0.894291	0.954132	0.921063	0.957816	0.904026	0.932467	0.905183	0.963499
YBL007C	SLA1	0.625272	0.897722	0.846905	0.852689	0.70375	0.83725	0.96028	0.863054	0.76653	0.82343	0.90747	0.788347
YBL008W	HIR1	0.301515	0.749914	0.330831	0.555385	0.762939	0.681611	0.773637	0.669583	0.540067	0.504085	0.637	0.192744
YBL009W	ALK2	0.369678	-0.246099	0.792213	0.58874	0.928183	0.870295	0.846002	0.511354	0.794956	0.346448	0.143008	-0.183787
YBL010C	LAA2	0.454242	0.842786	0.504781	0.887454	0.745086	0.602396	0.944127	0.897418	0.626113	0.738654	0.928329	0.396679
YBL011W	SCT1	0.57695	0.762105	0.36113	0.691199	0.750916	0.628617	0.738854	0.527602	0.65861	0.668755	0.652724	0.680362
YBL012C	YBL012C
YBL013W	FMT1
YBL014C	RRN6	0.708551	0.863194	0.800972	0.938472	0.795042	0.84278	0.933705	0.955699	0.708551	0.928067	0.839689	0.811604
YBL015W	ACH1	0.978941	0.924	0.977667	0.978431	0.984436	0.978322	0.948469	0.974742	0.976411	0.978431	0.948162	0.970251
YBL016W	FUS3	0.936986	0.803835	0.934622	0.953492	0.93958	0.937163	0.841851	0.936198	0.934965	0.94316	0.839424	0.91494
YBL017C	PEP1	0.892881	0.899402	0.920869	0.937828	0.833425	0.908717	0.91661	0.946991	0.715201	0.921024	0.888123	0.926377
YBL018C	POP8	0.923459	0.701136	0.936653	0.839696	0.939336	0.943172	0.703637	0.79966	0.91743	0.799799	0.794735	0.937284
YBL019W	APN2	0.923955	0.770132	0.951569	0.856574	0.978594	0.96131	0.759811	0.800082	0.970449	0.856574	0.729173	0.864643
YBL020W	RFT1	0.726598	0.674806	0.502234	0.60218	0.67581	0.555676	0.620833	0.719836	0.814054	0.717257	0.570028	0.468529
YBL021C	HAP3	0.786063	0.87462	0.885429	0.872422	0.819077	0.878444	0.892992	0.842763	0.864239	0.833118	0.895365	0.86794
YBL022C	PIM1	0.887627	0.907057	0.770921	0.773886	0.699802	0.755578	0.890274	0.848687	0.74244	0.739066	0.821537	0.753724
YBL023C	MCM2	0.634663	0.836819	0.298293	0.555046	0.813357	0.493353	0.855096	0.755031	0.543153	0.530071	0.746156	0.526624
YBL024W	NCL1	0.985494	0.982482	0.994229	0.990724	0.98435	0.994554	0.988575	0.990778	0.982959	0.988904	0.990039	0.992567
YBL025W	RRN10	0.802956	0.706423	0.910441	0.887939	0.80371	0.898936	0.752578	0.896383	0.828212	0.880194	0.62155	0.912782
YBL026W	LSM2	0.716573	0.767115	0.858352	0.857174	0.73649	0.595015	0.881889	0.856414	0.677807	0.583354	0.785875	0.767222
YBL027W	RPL19B
YBL028C	YBL028C	0.988443	0.964603	0.988592	0.984607	0.984921	0.985644	0.975568	0.991452	0.988443	0.990177	0.973572	0.991756
YBL029W	YBL029W	0.969393	0.958425	0.972898	0.950629	0.975076	0.973793	0.966129	0.972006	0.975077	0.963763	0.89664	0.968125
YBL030C	PET9	0.848945	0.694368	0.639188	0.746958	0.950356	0.639188	0.768737	0.663732	0.950356	0.746958	0.713303	0.470287
YBL031W	SHE1	0.779389	0.424164	0.534514	0.420567	0.428151	0.0750578	0.607804	0.504514	0.710229	0.479645	0.568207	0.429452
YBL032W	HEK2	0.929757	0.721671	0.897491	0.880119	0.955066	0.887939	0.795949	0.880119	0.956641	0.819349	0.826517	0.907126
YBL033C	RIB1	0.947505	0.914993	0.959076	0.971357	0.962984	0.941718	0.95217	0.920354	0.924821	0.94469	0.930754	0.941447
YBL034C	STU1	0.816655	0.688847	0.657218	0.751608	0.75375	0.622499	0.652597	0.620954	0.63925	0.761439	0.621697	0.649728
YBL035C	POL12	0.759819	0.831186	0.631095	0.65218	0.875587	0.716191	0.859989	0.668529	0.812398	0.636114	0.851498	0.58927
YBL036C	YBL036C	0.589812	0.408453	0.851995	0.894291	0.944023	0.880064	0.610673	0.843641	0.939884	0.859884	0.312543	0.674332
YBL037W	APL3	0.799645	0.88871	0.760542	0.915915	0.791531	0.806636	0.912879	0.9174	0.64136	0.819507	0.896441	0.782799
YBL038W	MRPL16	0.901637	0.229031	0.830449	0.725644	0.869613	0.81386	0.655355	0.616519	0.871038	0.70992	0.719248	0.794151
YBL039C	URA7	0.992661	0.994489	0.993912	0.995131	0.992661	0.995322	0.990991	0.995131	0.990561	0.995347	0.994984	0.995384
YBL040C	ERD2	0.1333	0.614957	0.746387	0.607333	0.465506	0.691955	0.772117	0.702812	0.422968	0.588883	0.693891	0.721758
YBL041W	PRE7	0.717435	0.919943	0.696197	0.928946	0.840363	0.722731	0.903648	0.665453	0.838913	0.928946	0.903648	0.428479
YBL042C	FUI1	0.856545	0.965895	0.947169	0.982573	0.939476	0.949044	0.975393	0.984851	0.947812	0.980278	0.922309	0.92587
YBL043W	ECM13	0.964972	0.990921	0.966111	0.981121	0.963757	0.969548	0.981505	0.980719	0.949427	0.980361	0.969656	0.966329
YBL044W	YBL044W
YBL045C	COR1	0.953637	0.710577	0.981826	0.962218	0.962443	0.94889	0.923953	0.970828	0.962443	0.920705	0.881535	0.975166
YBL046W	PSY4	0.688412	0.804439	0.464037	0.655496	0.791084	0.570652	0.776957	0.758432	0.771905	0.790203	0.828658	0.413834
YBL047C	EDE1	0.925461	0.963105	0.966832	0.924986	0.966268	0.98548	0.926316	0.928608	0.934537	0.919831	0.972879	0.972745
YBL048W	RRT1
YBL049W	MOH1	0.994973	0.986164	0.996341	0.990162	0.994973	0.996341	0.984577	0.990162	0.993427	0.990162	0.986164	0.996341
YBL050W	SEC17	0.976769	0.974363	0.976281	0.983763	0.985211	0.987059	0.977032	0.983763	0.973755	0.979928	0.983094	0.985911
YBL051C	PIN4	0.791238	0.525049	0.829383	0.68451	0.927555	0.83701	0.685975	0.657062	0.649037	0.632048	0.552356	0.748318
YBL052C	SAS3	0.801616	0.886662	0.692544	0.735955	0.880864	0.798259	0.863885	0.70613	0.802389	0.770659	0.905552	0.707574
YBL053W	YBL053W
YBL054W	TOD6	0.952318	0.958531	0.983702	0.983863	0.973684	0.986391	0.958327	0.983719	0.974881	0.98978	0.958531	0.983223
YBL055C	YBL055C	0.750497	0.577057	0.0901832	-0.0808843	0.76973	0.8394	0.255	0.329541	0.0687312	0.097679	0.504138	0.71168
YBL056W	PTC3	0.653107	0.368558	0.886718	0.707788	0.852143	0.904609	0.436565	0.708118	0.881377	0.666987	0.544156	0.827602
YBL057C	PTH2	0.754828	0.790013	0.78076	0.875479	0.83594	0.721039	0.77782	0.858931	0.809337	0.747251	0.733618	0.839815
YBL058W	SHP1	0.763633	0.611896	0.913547	0.948236	0.81044	0.930732	0.390454	0.871709	0.660107	0.950687	0.409805	0.849036
YBL059W	IAI11	0.931654	0.94066	0.943276	0.960709	0.936749	0.941266	0.966565	0.968334	0.906007	0.961329	0.963782	0.943491
YBL060W	YEL1	0.888419	0.80142	0.878298	0.700495	0.932471	0.888986	0.796558	0.665845	0.897641	0.680699	0.826609	0.878843
YBL061C	SKT5	0.930934	0.804786	0.776735	0.729101	0.852569	0.875078	0.592032	0.736429	0.818714	0.736429	0.781836	0.90478
YBL062W	YBL062W
YBL063W	KIP1	0.59245	0.789674	0.731923	0.852898	0.590046	0.624024	0.825734	0.900831	0.366755	0.688338	0.817925	0.773774
YBL064C	PRX1	0.995912	0.960199	0.991646	0.989937	0.995912	0.995315	0.913289	0.988688	0.989236	0.991013	0.960199	0.995315
YBL065W	YBL065W
YBL066C	SEF1	0.705401	0.800586	0.880536	0.859062	0.744963	0.867525	0.798874	0.839351	0.724623	0.857694	0.783816	0.843539
YBL067C	UBP13	0.747797	0.765337	0.764872	0.920721	0.786716	0.738672	0.884655	0.946978	0.673294	0.904473	0.879291	0.77719
YBL068W	PRS4	0.962211	0.887213	0.972473	0.968705	0.971009	0.968673	0.90153	0.966105	0.965433	0.965674	0.901573	0.967809
YBL069W	AST1	0.731671	0.395188	0.853644	0.841503	0.775262	0.832986	0.703	0.766749	0.705015	0.57194	0.859183	0.858859
YBL070C	YBL070C
YBL071C	YBL071C
YBL072C	RPS8A	0.996705	0.996963	0.997592	0.998727	0.998683	0.997592	0.996963	0.998717	0.998683	0.998727	0.996963	0.997592
YBL073W	YBL073W
YBL074C	AAR2
YBL075C	SSA3	0.965262	0.913959	0.977612	0.983799	0.970274	0.962141	0.936675	0.978282	0.958222	0.968402	0.937969	0.973112
YBL076C	ILS1	0.981501	0.951549	0.990332	0.992639	0.981501	0.97931	0.97767	0.991769	0.977271	0.974398	0.977363	0.991671
YBL077W	YBL077W
YBL078C	ATG8	0.992842	0.9875	0.993705	0.993454	0.992842	0.993705	0.9875	0.993454	0.992842	0.993454	0.9875	0.993705
YBL079W	NUP170	0.669998	0.610705	0.889911	0.846163	0.81495	0.921133	0.668587	0.847633	0.808594	0.812031	0.555343	0.850761
YBL080C	PET112	0.891411	0.789791	0.931273	0.609437	0.95639	0.942813	0.855426	0.67468	0.948771	0.610587	0.854432	0.936367
YBL081W	YBL081W	0.988624	0.953894	0.985976	0.97634	0.972698	0.985794	0.919271	0.979091	0.970731	0.97853	0.914792	0.985794
YBL082C	ALG3	0.936867	0.709905	0.96153	0.95873	0.962154	0.968236	0.785616	0.950847	0.966876	0.951112	0.862927	0.964005
YBL083C	YBL083C
YBL084C	CDC27	0.915418	0.922296	0.859774	0.900428	0.92503	0.853395	0.949658	0.911625	0.913112	0.90389	0.929944	0.861178
YBL085W	BOI1	0.769117	0.667976	0.486442	0.716568	0.843936	0.652264	0.650957	0.641397	0.62936	0.618481	0.510658	0.444835
YBL086C	YBL086C	0.902664	0.759954	0.944271	0.835338	0.954777	0.952559	0.818031	0.824739	0.902102	0.821842	0.788286	0.938817
YBL087C	RPL23A
YBL088C	TEL1	0.831621	0.951007	0.877917	0.798316	0.840716	0.898323	0.942333	0.783417	0.768276	0.735667	0.91388	0.904093
YBL089W	AVT5	0.962828	0.970521	0.952408	0.960824	0.962828	0.956445	0.969291	0.969155	0.935026	0.97059	0.98127	0.957836
YBL090W	MRP21	0.762074	0.651887	0.638199	0.846743	0.774692	0.510479	0.701619	0.79069	0.823926	0.893803	0.813191	0.680953
YBL091C	MAP2	0.881831	0.728168	0.656035	0.645781	0.931603	0.873409	0.774606	0.831118	0.848802	0.906331	0.616396	0.762786
YBL092W	RPL32	0.999095	0.99794	0.999435	0.99953	0.999271	0.999435	0.998476	0.999609	0.999271	0.99953	0.998063	0.999388
YBL093C	ROX3	0.0703816	0.234121	0.739988	0.865761	0.817663	0.498325	0.823394	0.886727	0.721666	0.201389	0.631627	0.567115
YBL094C	YBL094C
YBL095W	MRX3	0.959081	0.980716	0.984864	0.987774	0.958152	0.980264	0.99026	0.988481	0.97707	0.980192	0.982663	0.982356
YBL096C	YBL096C
YBL097W	BRN1
YBL098W	BNA4
YBL099W	ATP1	0.958497	0.903057	0.940711	0.915441	0.954163	0.934301	0.903057	0.940913	0.958497	0.938188	0.81414	0.932253
YBL100C	YBL100C
YBL101C	ECM21	0.975934	0.950655	0.96695	0.973088	0.97687	0.97898	0.964394	0.971867	0.948455	0.969256	0.963905	0.975832
YBL102W	SFT2	0.983986	0.931443	0.969145	0.952895	0.991833	0.987076	0.944361	0.959312	0.95692	0.964261	0.942872	0.973292
YBL103C	RTG3	0.946094	0.921081	0.966041	0.942677	0.937044	0.956522	0.959137	0.948837	0.94605	0.950278	0.925441	0.94138
YBL104C	SEA4	0.848807	0.770205	0.761119	0.781123	0.866349	0.814427	0.781805	0.727455	0.760894	0.687253	0.765522	0.762248
YBL105C	PKC1	0.670363	0.708189	0.874363	0.941216	0.69314	0.767695	0.896051	0.905832	0.779448	0.720943	0.89038	0.883484
YBL106C	SRO77	0.908753	0.860551	0.884885	0.917938	0.908572	0.901043	0.919765	0.944601	0.92435	0.932562	0.908319	0.901036
YBL107C	MIX23	0.613303	0.92373	0.854447	0.926733	0.682248	0.83698	0.955219	0.946066	0.701483	0.910107	0.919636	0.80814
YBL108W	YBL108W
YBL109W	YBL109W
YBL111C	YBL111C
YBL112C	YBL112C
YBL113C	YBL113C
YBR001C	NTH2	0.986278	0.975916	0.992492	0.99561	0.990292	0.992087	0.983422	0.992597	0.990292	0.992909	0.973958	0.990797
YBR002C	RER2	0.933568	0.876738	0.926285	0.945387	0.919101	0.931346	0.898886	0.929526	0.935471	0.937683	0.840607	0.92317
YBR003W	COQ1	0.78178	0.314152	0.909674	0.929411	0.948655	0.917989	0.366124	0.828006	0.905567	0.926666	0.105878	0.779314
YBR004C	GPI18	0.844525	0.709597	0.93257	0.869759	0.876072	0.912686	0.81789	0.862482	0.880837	0.849413	0.806342	0.907355
YBR005W	RCR1	0.97188	0.809942	0.942768	0.939577	0.973945	0.940508	0.834144	0.934422	0.969287	0.952529	0.815001	0.93685
YBR006W	UGA2	0.99333	0.987111	0.993547	0.991061	0.992266	0.992173	0.985746	0.989476	0.992653	0.988926	0.985746	0.991263
YBR007C	DSF2	0.863951	0.444306	0.829633	0.784086	0.95197	0.903945	0.581876	0.796557	0.882473	0.756159	0.462845	0.824423
YBR008C	FLR1	0.00986661	0.928837	0.608408	0.602471	0.829431	0.745726	0.965335	0.736431	0.749303	0.6793	0.78903	0.146259
YBR009C	HHF1	0.878539	0.958708	0.911862	0.959681	0.878539	0.911862	0.958708	0.959681	0.878539	0.959681	0.958708	0.911862
YBR010W	HHT1	0.878539	0.958708	0.911862	0.959681	0.913045	0.911862	0.958708	0.959681	0.878539	0.959681	0.958708	0.911862
YBR011C	IPP1	0.819093	0.739914	0.941267	0.958678	0.912962	0.945808	0.896281	0.958678	0.830582	0.921675	0.896281	0.941267
YBR012C	YBR012C
YBR013C	YBR013C
YBR014C	GRX7	0.835452	0.940487	0.93915	0.878211	0.912412	0.924448	0.918471	0.857572	0.908071	0.806089	0.940621	0.935133
YBR015C	MNN2	0.917174	0.913742	0.781446	0.835821	0.851462	0.851521	0.891166	0.916078	0.88079	0.916078	0.785784	0.752277
YBR016W	YBR016W	0.932715	0.938452	0.960829	0.94306	0.923282	0.950819	0.944061	0.923684	0.933917	0.907721	0.926467	0.936823
YBR017C	KAP104	0.930667	0.944025	0.939929	0.930302	0.934124	0.946441	0.920153	0.926637	0.946563	0.931691	0.956593	0.931404
YBR018C	GAL7	0.845209	0.900817	0.9421	0.907247	0.957291	0.967988	0.926564	0.880475	0.91605	0.906576	0.901688	0.932798
YBR019C	GAL10	0.763315	0.387332	0.910262	0.870529	0.92652	0.934845	0.706243	0.839862	0.88851	0.889295	0.564776	0.789443
YBR020W	GAL1	0.941638	0.94829	0.893116	0.846472	0.949959	0.925118	0.942512	0.828264	0.922932	0.846472	0.94829	0.909341
YBR021W	FUR4	0.868793	0.609785	0.962262	0.958846	0.897682	0.957904	0.784633	0.848681	0.923661	0.95368	0.615408	0.893498
YBR022W	POA1	0.963193	0.904924	0.922539	0.936492	0.953061	0.939104	0.97739	0.954497	0.872954	0.917477	0.934642	0.945759
YBR023C	CHS3	0.92304	0.805481	0.881662	0.767006	0.863492	0.895411	0.814196	0.776159	0.944828	0.83222	0.849468	0.903103
YBR024W	SCO2	0.947035	0.76722	0.915299	0.880053	0.973234	0.935164	0.794085	0.89583	0.963032	0.905283	0.848091	0.9402
YBR025C	OLA1	0.994999	0.990176	0.995735	0.995175	0.981939	0.992206	0.991862	0.995264	0.986123	0.989687	0.990646	0.995735
YBR026C	ETR1	0.983571	0.966179	0.991844	0.994082	0.986626	0.990792	0.981835	0.99199	0.988109	0.990644	0.987147	0.993024
YBR027C	YBR027C
YBR028C	YPK3	0.617655	0.743676	0.881551	0.706705	0.671475	0.807151	0.859653	0.717409	0.712895	0.669717	0.730332	0.683698
YBR029C	CDS1	0.859976	0.844554	0.853338	0.91715	0.870356	0.802389	0.883104	0.865767	0.829379	0.890648	0.87436	0.706475
YBR030W	RKM3	0.74829	0.785785	0.806646	0.897507	0.894364	0.806646	0.769426	0.893343	0.894364	0.897507	0.823631	0.723784
YBR031W	RPL4A
YBR032W	YBR032W
YBR033W	EDS1	0.942838	0.935748	0.970947	0.951532	0.983003	0.975837	0.944018	0.947498	0.975522	0.947962	0.952587	0.958699
YBR034C	HMT1	0.977432	0.984583	0.988271	0.986679	0.972954	0.990201	0.982537	0.984438	0.967585	0.984014	0.973366	0.986623
YBR035C	PDX3	0.950189	0.974417	0.990078	0.990485	0.964786	0.990212	0.99379	0.990677	0.961114	0.987311	0.972024	0.98187
YBR036C	CSG2	0.721394	0.916779	0.866532	0.924363	0.754242	0.836712	0.950687	0.925712	0.582787	0.8873	0.92442	0.882428
YBR037C	SCO1	0.830175	-0.297497	0.932033	0.772588	0.952899	0.959505	0.0201821	0.691113	0.928245	0.771115	-0.0909247	0.65926
YBR038W	CHS2	0.602401	0.759091	0.673024	0.701243	0.739871	0.625558	0.844893	0.865299	0.747693	0.816321	0.777546	0.550658
YBR039W	ATP3	0.810886	0.924633	0.902638	0.940913	0.949478	0.944842	0.963901	0.917011	0.81783	0.858155	0.924633	0.87757
YBR040W	FIG1
YBR041W	FAT1	0.684097	0.76734	0.640852	0.692677	0.684097	0.455815	0.724555	0.687599	0.582823	0.642841	0.792299	0.755475
YBR042C	CST26	0.917055	0.786951	0.859709	0.862925	0.921187	0.841986	0.812008	0.895928	0.910867	0.890002	0.774371	0.828356
YBR043C	QDR3	0.986525	0.987831	0.991031	0.991571	0.991378	0.990386	0.991664	0.990639	0.990179	0.991571	0.991208	0.988338
YBR044C	TCM62	0.852981	0.925055	0.823821	0.932421	0.836492	0.830112	0.929009	0.943442	0.871433	0.933471	0.925639	0.818995
YBR045C	GIP1
YBR046C	ZTA1	0.980395	0.980389	0.989256	0.985955	0.984844	0.990506	0.9851	0.988114	0.981275	0.984929	0.972177	0.989256
YBR047W	FMP23	0.981381	0.982736	0.978362	0.983482	0.983551	0.990621	0.988582	0.986467	0.969685	0.982529	0.986444	0.988942
YBR048W	RPS11B
YBR049C	REB1	0.678547	0.810202	0.808814	0.742671	0.685035	0.757582	0.834513	0.618415	0.78653	0.763834	0.816606	0.684623
YBR050C	REG2	0.95368	0.91309	0.960608	0.959386	0.957408	0.960608	0.944182	0.956027	0.957408	0.959386	0.938556	0.953667
YBR051W	YBR051W
YBR052C	RFS1	0.98928	0.978254	0.991503	0.992088	0.996195	0.994881	0.984925	0.995697	0.983716	0.992726	0.988581	0.992091
YBR053C	YBR053C	0.992875	0.990092	0.996081	0.995143	0.992875	0.996081	0.990092	0.995143	0.992875	0.995143	0.990092	0.996081
YBR054W	YRO2	0.838619	0.886375	0.931764	0.895683	0.944525	0.947208	0.952975	0.912009	0.902372	0.895683	0.898274	0.896505
YBR055C	PRP6	0.491133	0.702112	-0.513294	-0.304099	0.329159	0.646261	0.775915	0.858255	0.405061	0.781333	0.153968	0.673359
YBR056W	YBR056W	0.989478	0.950189	0.991005	0.989992	0.989557	0.989003	0.9412	0.987609	0.989557	0.988017	0.949076	0.987241
YBR057C	MUM2	0.881801	0.906692	0.903864	0.961826	0.904187	0.907951	0.917468	0.945747	0.906606	0.940985	0.919173	0.903462
YBR058C	UBP14	0.0413452	0.521589	-0.0393936	0.51389	0.773432	0.762879	0.914612	0.943409	-0.0196986	-0.0370052	0.700578	0.0443016
YBR059C	AKL1	0.953374	0.756549	0.965881	0.940558	0.942525	0.976305	0.810515	0.921671	0.924393	0.959514	0.819222	0.956567
YBR060C	ORC2	0.672845	0.759074	-0.0747142	0.290592	0.858788	0.869623	0.648454	0.564425	0.608695	0.471552	0.452576	0.854209
YBR061C	TRM7	0.972483	0.986816	0.968756	0.986979	0.962466	0.963519	0.988167	0.982513	0.966065	0.984441	0.98416	0.961005
YBR062C	YBR062C	0.623093	0.111609	0.973209	0.89531	0.940519	0.965891	0.171241	0.822568	0.931809	0.862679	0.0820713	0.777374
YBR063C	YBR063C	0.937651	0.941348	0.846055	0.89472	0.927125	0.85607	0.949765	0.904169	0.932703	0.904972	0.900826	0.858564
YBR064W	YBR064W
YBR065C	ECM2
YBR066C	NRG2	0.953465	0.874053	0.949368	0.966359	0.962754	0.946357	0.931617	0.981165	0.951711	0.971351	0.920886	0.967994
YBR067C	TIP1	0.97621	0.956443	0.9413	0.941153	0.936963	0.925093	0.937695	0.933583	0.923049	0.914463	0.9474	0.925093
YBR068C	BAP2	0.901154	0.951928	0.981279	0.986281	0.949381	0.980628	0.989235	0.986281	0.941892	0.959453	0.989235	0.981279
YBR069C	TAT1	0.985833	0.990289	0.984619	0.988687	0.993434	0.988427	0.977109	0.992531	0.984998	0.988687	0.969436	0.978932
YBR070C	ALG14	0.332071	0.691374	0.797335	0.807393	0.330227	0.35738	0.767831	0.79737	0.0891136	0.688562	0.747059	0.738583
YBR071W	YBR071W	0.48261	0.723769	0.904063	0.940326	0.454686	0.832371	0.78353	0.915916	0.361226	0.793775	0.782746	0.837308
YBR072W	HSP26	0.980625	0.81385	0.979756	0.976233	0.989804	0.984183	0.884796	0.985406	0.973739	0.969049	0.857052	0.987238
YBR073W	RDH54	0.571454	0.722069	0.775524	0.738214	0.69563	0.651219	0.795691	0.743193	0.663857	0.625035	0.870313	0.70524
YBR074W	PFF1	0.828256	0.796897	0.746275	0.828291	0.844744	0.669608	0.797311	0.743493	0.863508	0.815466	0.819297	0.738939
YBR076W	ECM8	0.863157	0.938256	0.832097	0.909545	0.877315	0.839742	0.934912	0.913804	0.877804	0.916776	0.944343	0.819325
YBR077C	SLM4	0.935661	0.935169	0.980675	0.968899	0.973708	0.987176	0.942136	0.970455	0.969642	0.968451	0.926094	0.973275
YBR078W	ECM33	0.950705	0.804683	0.952105	0.906134	0.965452	0.961705	0.746228	0.890854	0.95732	0.904346	0.841566	0.944666
YBR079C	RPG1	0.986572	0.982467	0.99442	0.993498	0.987573	0.991715	0.991587	0.993498	0.975092	0.988653	0.991587	0.99442
YBR080C	SEC18	0.807432	0.56243	0.926826	0.735794	0.938599	0.935415	0.654406	0.786004	0.909246	0.780424	0.5418	0.894062
YBR081C	SPT7	0.874942	0.924569	0.698635	0.674782	0.839518	0.709057	0.900035	0.76468	0.845266	0.754785	0.916915	0.678341
YBR082C	UBC4	0.990072	0.988179	0.990875	0.99251	0.990072	0.990875	0.988179	0.99251	0.990072	0.99251	0.988179	0.990875
YBR083W	TEC1	0.796725	0.454772	0.485451	-0.299689	0.878744	0.840168	0.751263	0.754985	0.439925	0.418594	-0.0103326	0.705662
YBR084W	MIS1	0.991891	0.985912	0.995735	0.995175	0.992234	0.993525	0.990646	0.995175	0.992234	0.992842	0.990646	0.995735
YBR085W	AAC3	0.886904	0.925421	0.932754	0.96413	0.929798	0.934553	0.920731	0.965932	0.91064	0.957839	0.911121	0.923521
YBR086C	IST2	0.745111	0.840171	0.790486	0.662474	0.743773	0.581862	0.739051	0.561023	0.829297	0.597342	0.866509	0.792063
YBR087W	RFC5	0.735728	0.777447	0.814719	0.829646	0.862127	0.86767	0.807475	0.71874	0.866542	0.751546	0.791753	0.698948
YBR088C	POL30	0.943121	0.831442	0.934398	0.936984	0.968429	0.960165	0.866434	0.939964	0.957774	0.925053	0.797822	0.923944
YBR089W	YBR089W
YBR090C	YBR090C
YBR091C	TIM12	0.848182	0.914303	0.918171	0.850509	0.828545	0.908742	0.924839	0.845518	0.834087	0.864514	0.969881	0.931428
YBR092C	PHO3	0.993434	0.971419	0.978152	0.976937	0.993434	0.988427	0.905503	0.966497	0.96049	0.975974	0.971419	0.988427
YBR093C	PHO5	0.760274	0.96661	0.948633	0.975487	0.712572	0.926286	0.963281	0.964846	0.712572	0.91341	0.963281	0.948633
YBR094W	PBY1	0.588562	0.25753	0.798728	0.755334	0.663199	0.656753	0.543946	0.704644	0.675641	0.400063	0.660299	0.781935
YBR095C	RXT2	0.874634	0.902036	0.913865	0.931497	0.837044	0.899934	0.936229	0.945091	0.818933	0.891544	0.919267	0.909802
YBR096W	YBR096W	0.459246	0.428102	0.837619	0.887456	0.762433	0.410985	0.864412	0.93655	0.26801	0.425494	0.802789	0.831049
YBR097W	VPS15	0.95099	0.947873	0.923148	0.930718	0.948203	0.967232	0.940045	0.939787	0.940096	0.940566	0.946338	0.949743
YBR098W	MMS4	0.921181	0.914322	0.90919	0.868879	0.930529	0.923689	0.904706	0.892298	0.932937	0.894889	0.900957	0.919901
YBR099C	YBR099C
YBR101C	FES1	0.83063	0.952848	0.94204	0.974098	0.83063	0.970672	0.945927	0.965072	0.737229	0.962529	0.952848	0.970672
YBR102C	EXO84	0.92009	0.893883	0.937982	0.890574	0.924588	0.934458	0.895865	0.889902	0.90543	0.897432	0.93812	0.938924
YBR103W	SIF2	0.956096	0.956002	0.964078	0.826102	0.963283	0.974809	0.957828	0.863782	0.953407	0.852576	0.942237	0.972037
YBR104W	YMC2	0.782659	0.769354	0.875902	0.840951	0.916673	0.910912	0.793526	0.760553	0.761446	0.802607	0.909907	0.926777
YBR105C	VID24	0.97001	0.97652	0.949993	0.9795	0.975355	0.938698	0.981062	0.980335	0.974575	0.977001	0.974833	0.94377
YBR106W	SND3	0.983824	0.975334	0.991669	0.989794	0.992741	0.989136	0.972983	0.982789	0.985089	0.984118	0.9601	0.988433
YBR107C	IML3	0.924808	0.926678	0.94001	0.973385	0.949258	0.937201	0.926678	0.965706	0.943246	0.972584	0.915845	0.936298
YBR108W	AIM3	0.94789	0.952885	0.974473	0.904534	0.937366	0.967937	0.943398	0.924965	0.940421	0.926154	0.951062	0.964425
YBR109C	CMD1	0.558679	0.760643	0.84687	0.856799	0.758211	0.934077	0.839772	0.603029	0.809943	0.72871	0.717764	0.867578
YBR110W	ALG1	0.376442	0.730984	0.830756	0.937197	0.518458	0.77393	0.93231	0.935371	0.524857	0.832943	0.876601	0.799333
YBR111C	YSA1	0.953696	0.813611	0.975271	0.97268	0.953696	0.960064	0.890992	0.968484	0.938808	0.93293	0.906839	0.981157
YBR112C	CYC8	0.764956	0.889613	0.76356	0.730806	0.839775	0.712263	0.92438	0.827511	0.821213	0.664902	0.902822	0.714219
YBR113W	YBR113W
YBR114W	RAD16	0.963719	0.968658	0.911221	0.97304	0.974839	0.909595	0.96355	0.966604	0.970484	0.96715	0.959548	0.872171
YBR115C	LYS2	0.980223	0.996004	0.979152	0.989678	0.959732	0.965808	0.996533	0.989678	0.950903	0.983683	0.996127	0.979152
YBR116C	YBR116C
YBR117C	TKL2	0.961545	0.953704	0.977042	0.988535	0.987292	0.990705	0.956301	0.987786	0.984717	0.988535	0.948068	0.944037
YBR118W	TEF2	0.99025	0.960294	0.978259	0.977788	0.987529	0.983427	0.964351	0.985295	0.99035	0.984306	0.906629	0.97444
YBR119W	MUD1	0.796102	0.519703	0.547337	0.461939	0.938306	0.91957	0.61545	0.633046	0.419087	0.595253	0.56705	0.708531
YBR120C	CBP6	0.724652	0.0475602	0.838668	0.663242	0.94494	0.92467	0.854307	0.744292	0.780404	0.47108	0.741121	0.757123
YBR121C	GRS1	0.997035	0.989764	0.99681	0.995543	0.997019	0.996375	0.986285	0.993156	0.996656	0.995543	0.990662	0.997313
YBR122C	MRPL36	0.590398	0.733717	0.811898	0.857871	0.855695	0.757881	0.922649	0.889345	0.740416	0.731962	0.89148	0.684361
YBR123C	TFC1	0.737537	0.626909	0.891869	0.825116	0.729707	0.830323	0.702789	0.802193	0.748146	0.754279	0.707272	0.868481
YBR124W	YBR124W
YBR125C	PTC4	0.763968	0.640125	0.626255	0.713379	0.738573	0.648645	0.449642	0.771006	0.715636	0.771006	0.362477	0.611085
YBR126C	TPS1	0.994637	0.96381	0.995575	0.995632	0.997084	0.995457	0.973175	0.993399	0.984566	0.990739	0.96111	0.993579
YBR127C	VMA2	0.927847	0.822967	0.930759	0.82714	0.626055	0.744622	0.678487	0.789824	0.339357	0.801325	0.678487	0.620447
YBR128C	ATG14	0.985953	0.975427	0.982484	0.980836	0.991303	0.989212	0.980642	0.984454	0.988774	0.981105	0.973513	0.987097
YBR129C	OPY1	0.904093	0.881757	0.90118	0.788239	0.939789	0.911754	0.880188	0.813885	0.924439	0.795639	0.888456	0.911983
YBR130C	SHE3	0.952779	0.785523	0.758195	0.607444	0.917352	0.880408	0.624673	0.619974	0.825998	0.67346	0.729621	0.8014
YBR131W	CCZ1	0.963827	0.881316	0.960924	0.854574	0.991757	0.985258	0.912869	0.871939	0.938254	0.855916	0.898612	0.977761
YBR132C	AGP2	0.990341	0.973375	0.985589	0.987246	0.990341	0.990114	0.954367	0.983151	0.989311	0.992372	0.973375	0.990114
YBR133C	HSL7	0.666465	0.884563	0.834087	0.926849	0.846304	0.871482	0.903029	0.943042	0.807142	0.937992	0.877024	0.82503
YBR134W	YBR134W
YBR135W	CKS1	0.870747	0.547678	0.780773	0.418813	0.919381	0.91612	0.163152	0.602181	0.903045	0.533802	0.500422	0.864319
YBR136W	MEC1	0.921896	0.928517	0.903442	0.897564	0.926884	0.912456	0.918123	0.885045	0.941858	0.86564	0.915068	0.926928
YBR137W	YBR137W	0.979314	0.898006	0.984755	0.947558	0.981287	0.989962	0.88113	0.954351	0.962342	0.936286	0.885797	0.989047
YBR138C	YBR138C	0.974662	0.966971	0.976506	0.975681	0.9748	0.979492	0.96922	0.970704	0.966628	0.975052	0.962922	0.982389
YBR139W	ATG42	0.996301	0.990883	0.993168	0.994118	0.99478	0.993931	0.991094	0.994364	0.989094	0.994147	0.981844	0.993183
YBR140C	IRA1	0.938382	0.935847	0.938959	0.929935	0.960934	0.955295	0.93014	0.936509	0.886649	0.931128	0.921824	0.942503
YBR141C	BMT2	0.97922	0.973327	0.981269	0.986609	0.972642	0.978772	0.970421	0.982337	0.978084	0.985435	0.969593	0.979201
YBR142W	MAK5	0.992974	0.989486	0.98987	0.990393	0.993964	0.993898	0.988506	0.990413	0.988335	0.991355	0.985368	0.992675
YBR143C	SUP45	0.982052	0.979379	0.990999	0.984897	0.99056	0.995005	0.985491	0.985303	0.986519	0.979789	0.988793	0.991724
YBR144C	YBR144C
YBR145W	ADH5	0.946964	0.526982	0.974105	0.9119	0.984745	0.981235	0.63846	0.881186	0.964087	0.907287	0.548721	0.939739
YBR146W	MRPS9	0.644994	0.899263	0.748623	0.663211	0.618954	0.494291	0.844995	0.723524	0.576268	0.564601	0.835188	0.760282
YBR147W	RTC2	0.981193	0.960208	0.992551	0.982659	0.995256	0.994199	0.982577	0.988408	0.992293	0.987407	0.960208	0.987901
YBR148W	YSW1	0.950814	0.825764	0.966885	0.949816	0.97459	0.967095	0.875348	0.959459	0.967098	0.947074	0.816957	0.945929
YBR149W	ARA1	0.987762	0.983345	0.994856	0.995143	0.992875	0.995187	0.990234	0.994537	0.992367	0.993112	0.990613	0.995872
YBR150C	TBS1	0.93272	0.97003	0.969205	0.975879	0.947729	0.970239	0.985979	0.980097	0.931536	0.976569	0.977563	0.961458
YBR151W	APD1	0.59497	0.867724	0.651286	0.504517	0.211877	0.609835	0.622407	0.521478	0.637618	0.465661	0.911633	0.769323
YBR152W	SPP381
YBR153W	RIB7	0.865404	0.790841	0.622836	0.562017	0.811939	0.654636	0.836909	0.512708	0.755162	0.511364	0.809066	0.610297
YBR154C	RPB5	0.991419	0.991173	0.994272	0.99349	0.989699	0.994263	0.991211	0.994565	0.987947	0.993833	0.992717	0.996798
YBR155W	CNS1	0.976769	0.965735	0.987665	0.989099	0.986145	0.98958	0.968609	0.988018	0.98026	0.989099	0.966605	0.985578
YBR156C	SLI15	0.658992	0.797754	0.680995	0.657956	0.77841	0.620905	0.8525	0.668316	0.642331	0.505349	0.803526	0.521544
YBR157C	ICS2
YBR158W	AMN1	0.530374	0.341549	0.815051	0.706111	0.840487	0.854104	0.507107	0.650452	0.712604	0.669112	0.488836	0.705906
YBR159W	IFA38	0.60373	0.499891	0.658861	0.772123	0.862514	0.689589	0.527161	0.445599	0.727521	0.714725	0.571046	0.440626
YBR160W	CDC28	0.0477184	0.776831	0.694427	0.655846	0.528981	0.671432	0.899587	0.401421	0.423422	0.382009	0.81843	0.291508
YBR161W	CSH1	0.834068	0.780358	0.849459	0.847106	0.840282	0.874243	0.773485	0.839557	0.809467	0.881879	0.560225	0.879884
YBR162C	TOS1	0.871221	0.942958	0.842919	0.82229	0.765686	0.756488	0.942958	0.79829	0.871221	0.79829	0.899154	0.756488
YBR163W	EXO5	0.837526	0.818905	0.89783	0.902463	0.878672	0.887604	0.864873	0.943453	0.874123	0.911593	0.824827	0.867105
YBR164C	ARL1
YBR165W	UBS1	0.779814	0.592773	0.903778	0.491454	0.860612	0.88781	0.496937	0.574465	0.855257	0.578916	0.477071	0.850742
YBR166C	TYR1	0.417215	0.687766	0.47563	0.550562	0.865081	0.733096	0.924886	0.898326	0.417215	0.591055	0.439268	0.47563
YBR167C	POP7	0.627569	0.564532	0.713948	0.576617	0.874773	0.758907	0.634977	0.69965	0.731021	0.55541	0.6996	0.566951
YBR168W	PEX32	0.955224	0.970059	0.936874	0.954577	0.953731	0.936844	0.961726	0.966442	0.946479	0.960439	0.959829	0.936616
YBR169C	SSE2	0.990999	0.956435	0.977139	0.988647	0.990954	0.984304	0.974618	0.990791	0.982373	0.985343	0.977008	0.988108
YBR170C	NPL4	0.939385	0.428778	0.962775	0.946856	0.946824	0.955887	0.532959	0.931336	0.934999	0.920424	0.428778	0.94999
YBR171W	SEC66	0.964631	0.828471	0.891221	0.843826	0.966947	0.959814	0.735708	0.827108	0.93697	0.811924	0.852661	0.961115
YBR172C	SMY2	0.901314	0.795485	0.950982	0.90143	0.90899	0.885578	0.874214	0.955955	0.901314	0.921169	0.880914	0.965478
YBR173C	UMP1	0.595595	0.273944	0.388413	0.877506	0.696131	0.771328	0.579741	0.869936	-0.0859654	0.875675	0.621264	0.719333
YBR174C	YBR174C
YBR175W	SWD3	0.618991	0.3655	0.751842	0.778104	0.669496	0.6151	0.315661	0.697657	0.425431	0.739116	0.357435	0.751958
YBR176W	ECM31	0.430307	0.543306	0.599009	0.663217	0.516874	0.580504	0.727838	0.589315	0.486616	0.681156	0.47938	0.441401
YBR177C	EHT1	0.966837	0.982339	0.994243	0.993417	0.977987	0.989925	0.989185	0.993417	0.977987	0.992204	0.989185	0.994243
YBR178W	YBR178W
YBR179C	FZO1	0.803333	0.655851	0.80382	0.746864	0.850978	0.839392	0.630336	0.70308	0.807578	0.70452	0.711504	0.810446
YBR180W	DTR1	-0.738371	-0.675281	-0.749752	-0.814305	0.893795	0.875134	0.95909	0.947407	-0.724439	-0.792737	-0.24267	-0.795032
YBR181C	RPS6B
YBR182C	SMP1	0.90727	0.904216	0.832123	0.909489	0.896623	0.847988	0.946808	0.92429	0.90727	0.90624	0.93197	0.851089
YBR183W	YPC1	0.980897	0.959202	0.983362	0.981653	0.985501	0.990225	0.968025	0.984118	0.983709	0.981653	0.959202	0.98439
YBR184W	YBR184W	0.857265	0.830759	0.924109	0.920864	0.872568	0.920154	0.809833	0.897887	0.849635	0.906049	0.838357	0.925886
YBR185C	MBA1	0.623	0.858022	0.444635	0.50023	0.612212	0.580699	0.903955	0.764018	0.653041	0.491258	0.799485	0.499819
YBR186W	PCH2
YBR187W	GDT1	0.982094	0.929911	0.965535	0.978376	0.988071	0.98367	0.968618	0.979948	0.971196	0.978376	0.949471	0.974021
YBR188C	NTC20	0.75885	0.669303	0.765398	0.667129	0.814295	0.818635	0.687036	0.637028	0.60296	0.654792	0.686304	0.709507
YBR189W	RPS9B
YBR190W	YBR190W
YBR191W	RPL21A	0.998533	0.995911	0.999206	0.998577	0.999181	0.999206	0.99666	0.998714	0.999181	0.998295	0.995911	0.998808
YBR192W	RIM2	0.939753	0.956839	0.958063	0.971825	0.915736	0.96517	0.959455	0.973104	0.899417	0.960931	0.929024	0.954676
YBR193C	MED8	0.835345	0.848565	0.896687	0.892515	0.809062	0.873726	0.883968	0.907824	0.836054	0.904159	0.85538	0.896687
YBR194W	AIM4	0.876044	0.790354	0.830319	0.84851	0.897436	0.84526	0.816545	0.835608	0.871025	0.840567	0.8145	0.794575
YBR195C	MSI1	0.47753	0.697046	0.758947	0.746428	0.763847	0.650274	0.343755	0.375583	0.80757	0.761272	0.441996	0.188451
YBR196C	PGI1	0.982563	0.981232	0.979731	0.978563	0.982563	0.979731	0.981232	0.978563	0.982563	0.978563	0.981232	0.979731
YBR197C	YBR197C
YBR198C	TAF5	0.70302	0.562321	0.813939	0.745833	0.76137	0.763684	0.578593	0.69328	0.732172	0.660142	0.659275	0.791452
YBR199W	KTR4	0.925441	0.95339	0.963391	0.984545	0.938808	0.967923	0.958589	0.981756	0.925875	0.977912	0.942212	0.960509
YBR200W	BEM1	0.90312	0.795858	0.892725	0.797366	0.90687	0.884749	0.779118	0.798021	0.919015	0.786042	0.73776	0.836121
YBR201W	DER1	0.944921	0.920871	0.942355	0.955687	0.944266	0.940442	0.969114	0.964547	0.947994	0.939784	0.95133	0.942355
YBR202W	MCM7	0.801057	0.942356	0.930252	0.935299	0.819818	0.922625	0.95304	0.927829	0.821434	0.913385	0.94567	0.932798
YBR203W	COS111	0.126666	0.630106	0.955505	0.884721	0.981104	0.962981	0.58438	0.654189	0.985229	0.909293	0.488166	0.305887
YBR204C	LDH1	0.966887	0.949257	0.979112	0.973457	0.986139	0.977526	0.948725	0.97155	0.987723	0.976834	0.946447	0.97965
YBR205W	KTR3	0.815395	0.909519	0.973135	0.980667	0.874413	0.91606	0.964914	0.978951	0.851184	0.901029	0.946632	0.939858
YBR206W	YBR206W
YBR207W	FTH1	0.945518	0.947439	0.936992	0.866281	0.908244	0.934856	0.941725	0.885662	0.857942	0.864708	0.909268	0.958542
YBR208C	DUR1,2	0.992069	0.992782	0.988314	0.996281	0.992312	0.987378	0.994488	0.996281	0.992069	0.99433	0.994488	0.988314
YBR209W	YBR209W
YBR210W	ERV15	0.865106	0.786032	0.773055	0.647155	0.924554	0.909849	0.850849	0.577107	0.836961	0.406869	0.895676	0.888518
YBR211C	AME1	0.939904	0.938511	0.945442	0.946641	0.946862	0.958447	0.937245	0.944999	0.935573	0.948397	0.926973	0.938799
YBR212W	NGR1	0.965107	0.947143	0.971523	0.955835	0.968127	0.978134	0.92338	0.966656	0.934562	0.956801	0.941089	0.9776
YBR213W	MET8	0.961522	0.989145	0.990615	0.992814	0.959927	0.986503	0.990037	0.99248	0.958879	0.989905	0.990619	0.990615
YBR214W	SDS24	0.988017	0.957948	0.995457	0.992034	0.991049	0.993606	0.970838	0.989672	0.991049	0.991638	0.978972	0.994113
YBR215W	HPC2	0.691562	0.826907	0.785731	0.720319	0.698164	0.786057	0.930056	0.728312	0.676221	0.679496	0.943044	0.80623
YBR216C	YBP1	0.967239	0.887501	0.961987	0.935454	0.969715	0.962714	0.918131	0.941235	0.957556	0.931659	0.940751	0.963213
YBR217W	ATG12	0.90894	0.855254	0.93763	0.898489	0.959244	0.945779	0.881163	0.866032	0.953545	0.895078	0.851573	0.941147
YBR218C	PYC2	0.823052	0.856308	0.941802	0.857316	0.951408	0.974955	0.946837	0.89993	0.884536	0.857316	0.881058	0.909903
YBR219C	YBR219C
YBR220C	YBR220C	0.706233	0.491674	0.0618819	0.636658	0.864807	0.733862	0.523026	0.786116	0.110862	0.599306	0.568875	0.549042
YBR221C	PDB1	0.76763	0.908782	0.928157	0.919284	0.656351	0.775136	0.866071	0.801311	0.451204	0.726867	0.894749	0.923697
YBR222C	PCS60	0.881437	0.907156	0.938714	0.966948	0.87794	0.943536	0.972022	0.981111	0.856354	0.957332	0.923195	0.938698
YBR223C	TDP1	0.947409	0.917607	0.963807	0.971047	0.963722	0.978221	0.935855	0.97735	0.954602	0.967316	0.917179	0.961153
YBR224W	YBR224W
YBR225W	YBR225W	0.839052	0.93186	0.951454	0.958296	0.882161	0.955895	0.948988	0.946672	0.869168	0.957417	0.946812	0.948505
YBR226C	YBR226C
YBR227C	MCX1	0.59241	0.846509	0.60022	0.71599	0.845763	0.771079	0.95776	0.897651	0.50814	0.76853	0.900043	0.496565
YBR228W	SLX1	0.945184	0.966034	0.954636	0.966161	0.963705	0.954572	0.97105	0.958599	0.96025	0.963046	0.955328	0.944207
YBR229C	ROT2	0.761321	0.28568	0.89626	0.75461	0.624434	0.890371	0.30514	0.6848	0.70275	0.709152	0.230835	0.886881
YBR230C	OM14	0.989118	0.961177	0.989104	0.989695	0.994032	0.99389	0.969011	0.990003	0.987171	0.989695	0.961177	0.987295
YBR231C	SWC5	0.932352	0.921854	0.877082	0.937565	0.92502	0.890928	0.911908	0.958883	0.909753	0.960057	0.885686	0.867036
YBR232C	YBR232C
YBR233W	PBP2	0.765588	0.89552	0.821478	0.842955	0.80888	0.816752	0.885357	0.906762	0.752549	0.879692	0.886886	0.842531
YBR234C	ARC40	0.967081	0.954791	0.977497	0.985664	0.941696	0.968113	0.929171	0.968061	0.915967	0.973205	0.918501	0.965406
YBR235W	VHC1	0.977872	0.984549	0.984083	0.984161	0.987194	0.980402	0.991565	0.984884	0.987194	0.984161	0.986105	0.969886
YBR236C	ABD1	0.861893	0.876321	0.858837	0.913921	0.905174	0.828741	0.916986	0.924125	0.88487	0.873259	0.913355	0.886307
YBR237W	PRP5	0.894532	0.723629	0.863074	0.470854	0.93099	0.915198	0.805489	0.64321	0.897642	0.513192	0.715191	0.874226
YBR238C	YBR238C	0.927167	0.923654	0.975553	0.972965	0.930471	0.974705	0.93111	0.96575	0.918168	0.969412	0.905699	0.9676
YBR239C	ERT1	0.69669	0.68008	0.579838	0.516955	0.782384	0.68091	0.687057	0.683554	0.523239	0.488774	0.616752	0.589364
YBR240C	THI2
YBR241C	YBR241C	0.991312	0.977091	0.995289	0.991022	0.993334	0.995289	0.975993	0.99076	0.993334	0.991022	0.97818	0.992547
YBR242W	YBR242W	0.938603	0.897861	0.956718	0.889375	0.945373	0.975507	0.942204	0.939584	0.93091	0.885409	0.8867	0.972685
YBR243C	ALG7	0.772081	0.699586	0.636287	0.625439	0.782717	0.539974	0.78887	0.743835	0.871285	0.792383	0.794197	0.644067
YBR244W	GPX2	0.908165	0.964963	0.916151	0.962163	0.93384	0.913787	0.970257	0.979539	0.907361	0.97624	0.937266	0.86516
YBR245C	ISW1	0.836721	0.815714	0.836107	0.862572	0.86304	0.798971	0.847682	0.868034	0.836721	0.859158	0.723895	0.836107
YBR246W	RRT2	0.250381	0.801344	0.80911	0.88882	0.899303	0.883159	0.889732	0.90942	0.500543	0.877541	0.802351	0.615305
YBR247C	ENP1	0.990349	0.98853	0.99454	0.993671	0.989211	0.994683	0.993093	0.995159	0.990349	0.994367	0.993016	0.995532
YBR248C	HIS7	0.914566	0.903152	0.944119	0.930128	0.89202	0.911415	0.940364	0.89993	0.909301	0.884405	0.932979	0.884426
YBR249C	ARO4	0.904261	0.593719	0.958385	0.931308	0.943991	0.964215	0.78492	0.906054	0.93832	0.910791	0.853261	0.973566
YBR250W	SPO23
YBR251W	MRPS5	0.725929	0.681565	0.637713	0.465801	0.683883	0.726786	0.843946	0.641234	0.733659	0.728105	0.817125	0.566653
YBR252W	DUT1	0.974253	0.977882	0.956956	0.975158	0.971248	0.978454	0.97191	0.982094	0.968748	0.984336	0.96614	0.955355
YBR253W	SRB6	0.838411	0.927147	0.917801	0.886812	0.941017	0.94009	0.903307	0.893526	0.860919	0.882822	0.927799	0.894917
YBR254C	TRS20	0.589112	0.726733	0.354922	0.893375	0.63453	0.605536	0.913316	0.905416	0.247016	0.772169	0.903167	0.608805
YBR255W	MTC4	0.964499	0.918821	0.956006	0.966002	0.967647	0.958837	0.917224	0.953276	0.970233	0.964737	0.906153	0.953752
YBR256C	RIB5	0.978081	0.959923	0.977972	0.983078	0.986925	0.985599	0.969154	0.98159	0.978053	0.983078	0.959923	0.973659
YBR257W	POP4	0.588924	0.592419	0.700063	0.864983	0.69297	0.526461	0.596601	0.872398	0.532095	0.822765	0.628148	0.604063
YBR258C	SHG1
YBR259W	YBR259W	0.855656	0.767129	0.868942	0.87427	0.888588	0.882131	0.763103	0.877041	0.837996	0.880477	0.73972	0.869728
YBR260C	RGD1	0.858005	0.849588	0.754769	0.849026	0.885913	0.836073	0.886016	0.823979	0.798803	0.829121	0.84139	0.768704
YBR261C	TAE1	0.940189	0.974769	0.97516	0.983734	0.955944	0.974599	0.954927	0.987208	0.945296	0.986624	0.965842	0.971465
YBR262C	MIC12	0.881022	0.66051	0.73753	0.404834	0.932434	0.902893	0.922286	0.753377	0.600747	-0.288804	0.73367	0.882664
YBR263W	SHM1	0.978779	0.981481	0.984719	0.99157	0.992924	0.98593	0.979806	0.98388	0.987137	0.983418	0.981481	0.978476
YBR264C	YPT10	0.670221	0.0545251	0.732751	0.33719	0.930894	0.942387	0.618442	0.577144	0.793054	0.216772	0.155936	0.832159
YBR265W	TSC10	-0.325514	-0.171043	0.697569	0.627085	0.852865	0.843552	0.591903	0.767214	0.518361	0.182134	0.160553	-0.184804
YBR266C	SLM6
YBR267W	REI1	0.986809	0.984842	0.995844	0.994347	0.994484	0.996021	0.984688	0.994308	0.99086	0.99121	0.988685	0.992357
YBR268W	MRPL37	0.728425	0.742773	0.768113	0.783279	0.810759	0.842804	0.894296	0.887282	0.637357	0.834575	0.600145	0.689491
YBR269C	SDH8	0.988072	0.978524	0.991885	0.99577	0.989754	0.990495	0.989365	0.99425	0.988002	0.99514	0.987693	0.990396
YBR270C	BIT2	0.962526	0.711474	0.94516	0.824923	0.954365	0.950855	0.800164	0.79734	0.955007	0.80298	0.789211	0.935896
YBR271W	EFM2	0.95479	0.957359	0.979689	0.956641	0.977713	0.987858	0.959059	0.963887	0.963265	0.955483	0.957444	0.986016
YBR272C	HSM3	0.947127	0.863084	0.966897	0.943464	0.972547	0.979679	0.848605	0.935689	0.969458	0.938902	0.814902	0.969488
YBR273C	UBX7	0.793926	0.744273	0.924942	0.931144	0.721004	0.880636	0.815797	0.948893	0.7649	0.934986	0.75571	0.928221
YBR274W	CHK1	0.87944	0.637798	0.908304	0.804545	0.950674	0.933611	0.669232	0.788781	0.930298	0.798485	0.671177	0.871217
YBR275C	RIF1	0.69921	0.774564	0.523177	0.619015	0.732971	0.585194	0.81551	0.608489	0.765013	0.582376	0.784607	0.595787
YBR276C	PPS1	0.710834	0.472759	0.684782	0.70759	0.741739	0.746723	0.851004	0.568902	0.717946	0.604284	0.850275	0.555616
YBR277C	YBR277C
YBR278W	DPB3	0.919399	0.910402	0.954962	0.95036	0.973851	0.968326	0.924292	0.93693	0.93279	0.952883	0.910402	0.955358
YBR279W	PAF1	0.679744	0.433352	0.631709	0.488396	0.661015	0.57524	0.407191	0.530881	0.69127	0.557193	0.325555	0.714768
YBR280C	SAF1	0.986334	0.986801	0.986503	0.991961	0.987173	0.989491	0.98652	0.993105	0.984775	0.991961	0.989016	0.988182
YBR281C	DUG2	0.721904	0.822241	0.898223	0.937684	0.902786	0.877567	0.952716	0.939347	0.8372	0.712598	0.89767	0.814488
YBR282W	MRPL27	0.520193	0.539622	0.355858	0.762709	0.536687	0.669823	0.961514	0.922431	-0.0392557	0.0150624	0.950888	0.812331
YBR283C	SSH1	0.981487	0.88834	0.98163	0.926686	0.975968	0.977399	0.942526	0.977917	0.982235	0.972062	0.935083	0.982695
YBR284W	YBR284W	0.939226	0.818526	0.917773	0.941265	0.967863	0.919284	0.867327	0.949468	0.939752	0.946429	0.83576	0.90088
YBR285W	YBR285W	0.986382	0.981577	0.993919	0.995569	0.995493	0.994611	0.986132	0.995503	0.991856	0.995041	0.981577	0.990308
YBR286W	APE3	0.406214	0.371954	0.787883	0.928847	0.775082	0.854841	-0.10162	0.629236	0.898698	0.978953	0.023164	0.783268
YBR287W	YBR287W	0.973847	0.977539	0.980568	0.983489	0.978004	0.979618	0.986188	0.989023	0.973847	0.988117	0.976476	0.980568
YBR288C	APM3	0.883418	0.859727	0.370287	0.787088	0.762676	0.723735	0.762189	0.792958	0.705959	0.741004	0.777946	0.55611
YBR289W	SNF5	0.799543	0.933513	0.80863	0.892096	0.758914	0.77116	0.917132	0.869651	0.743871	0.85016	0.917937	0.719654
YBR290W	BSD2	0.89717	0.924443	0.92947	0.887668	0.91414	0.931596	0.910684	0.893862	0.889502	0.889803	0.90177	0.940429
YBR291C	CTP1	0.952539	0.975279	0.971029	0.988311	0.960641	0.968787	0.994355	0.99278	0.960641	0.972045	0.992845	0.976214
YBR292C	YBR292C
YBR293W	VBA2	0.976326	0.977672	0.98311	0.98655	0.984252	0.985092	0.993286	0.994074	0.976326	0.977172	0.984589	0.98311
YBR294W	SUL1	0.992051	0.991057	0.993121	0.995346	0.992051	0.994377	0.995658	0.996424	0.985585	0.995111	0.991057	0.994377
YBR295W	PCA1	0.949463	0.969958	0.909664	0.975639	0.957885	0.935998	0.975054	0.97376	0.947437	0.972258	0.96124	0.918342
YBR296C	PHO89	0.949913	0.893575	0.955193	0.934791	0.951768	0.921186	0.954613	0.945103	0.956228	0.857588	0.954613	0.953244
YBR297W	MAL33
YBR298C	MAL31
YBR299W	MAL32
YBR300C	YBR300C
YBR301W	PAU24
YBR302C	COS2
YCL001W	RER1	0.677353	0.820518	0.866602	0.865063	0.625775	0.707634	0.859083	0.862139	0.744858	0.825603	0.887095	0.926406
YCL002C	YCL002C	0.772759	0.756076	0.821126	0.722337	0.772365	0.843081	0.762846	0.64265	0.782996	0.657303	0.794007	0.861071
YCL004W	PGS1
YCL005W	LDB16	0.444511	0.468782	0.547554	0.519548	0.650306	0.664761	0.7816	0.599393	0.527228	0.551977	0.652832	0.31105
YCL007C	YCL007C
YCL008C	STP22	0.70102	0.552479	0.963084	0.927161	0.976048	0.965873	0.590904	0.716525	0.954961	0.861703	0.700837	0.712529
YCL009C	ILV6	0.929897	0.881043	0.926453	0.61459	0.83695	0.942449	0.889931	0.846554	0.929897	0.794755	0.782229	0.886862
YCL010C	SGF29	0.770229	0.860975	0.903164	0.89329	0.836309	0.897566	0.866226	0.895641	0.831872	0.887637	0.84446	0.899201
YCL011C	GBP2	0.655501	0.823579	0.915112	0.901145	0.801035	0.851156	0.861459	0.886743	0.840456	0.803279	0.81076	0.838713
YCL014W	BUD3	0.683489	0.730027	0.379381	0.633857	0.630341	0.696362	0.855323	0.74651	0.81484	0.756114	0.812631	0.69556
YCL016C	DCC1	0.904813	0.941004	0.892596	0.950628	0.909768	0.898466	0.933788	0.965723	0.857556	0.946381	0.90575	0.892027
YCL017C	NFS1	0.639706	0.843731	0.681907	0.913455	0.69845	0.774137	0.943764	0.936684	0.298334	0.77277	0.893017	0.757
YCL018W	LEU2	0.415162	0.441859	0.893313	0.897103	0.380036	0.447012	0.88128	0.852725	0.380036	0.352732	0.88128	0.815789
YCL019W	YCL019W
YCL020W	YCL020W
YCL022C	YCL022C
YCL023C	YCL023C
YCL024W	KCC4	0.768498	0.553319	0.626129	0.521738	0.615415	0.557227	0.76418	0.31296	0.722072	0.582581	0.468663	0.437797
YCL025C	AGP1	0.991078	0.973423	0.993065	0.992276	0.993026	0.991028	0.990065	0.992276	0.990914	0.988284	0.991902	0.99404
YCL027W	FUS1	0.946829	0.91308	0.941139	0.810523	0.957365	0.963705	0.882573	0.755945	0.955765	0.789336	0.895084	0.956774
YCL028W	RNQ1	0.812819	0.786616	0.475263	0.496227	0.547335	0.254681	0.738246	0.777201	0.809604	0.816873	0.286816	0.60634
YCL029C	BIK1	0.619184	0.574301	0.695942	0.566682	0.595951	0.645143	0.633944	0.696252	0.733814	0.662703	0.733287	0.721222
YCL030C	HIS4	0.978421	0.987779	0.9814	0.976681	0.975018	0.9814	0.98733	0.976463	0.975018	0.976681	0.98733	0.972907
YCL031C	RRP7	0.940792	0.864256	0.914136	0.958545	0.926439	0.923669	0.889357	0.949239	0.957712	0.963537	0.879699	0.903711
YCL032W	STE50	0.880313	0.920757	0.931274	0.951531	0.926085	0.9385	0.95186	0.959985	0.913506	0.936412	0.893142	0.918584
YCL033C	MXR2	0.987779	0.977273	0.98685	0.987408	0.987779	0.995184	0.969315	0.991092	0.978243	0.987063	0.975719	0.995184
YCL034W	LSB5	0.968889	0.960543	0.980074	0.972257	0.989898	0.992779	0.967235	0.983228	0.977364	0.970512	0.961247	0.983613
YCL035C	GRX1	0.985904	0.975719	0.993495	0.99142	0.989882	0.995184	0.975882	0.987555	0.994954	0.992147	0.975719	0.990666
YCL036W	GFD2	0.872762	0.977149	0.973935	0.967684	0.887857	0.972905	0.981972	0.974129	0.915736	0.972138	0.96371	0.975298
YCL037C	SRO9	0.987685	0.971245	0.989126	0.984814	0.991304	0.992498	0.984	0.988007	0.984887	0.984814	0.971245	0.988749
YCL038C	ATG22	0.983357	0.977169	0.989116	0.990716	0.986855	0.985788	0.983711	0.99281	0.985682	0.991793	0.978263	0.983105
YCL039W	GID7	0.983666	0.968161	0.986527	0.979407	0.979481	0.984896	0.96834	0.980216	0.980947	0.980172	0.961497	0.982822
YCL040W	GLK1	0.985377	0.908877	0.995942	0.991675	0.997084	0.995942	0.908245	0.989609	0.996063	0.991675	0.925369	0.992575
YCL041C	YCL041C
YCL042W	YCL042W
YCL043C	PDI1	0.935869	0.891616	0.89933	0.9596	0.97272	0.915285	0.89799	0.95309	0.960897	0.966317	0.883125	0.894993
YCL044C	MGR1	0.50062	0.842366	0.333824	0.769788	0.42166	0.342149	0.895493	0.827686	0.492043	0.746012	0.155925	0.262572
YCL045C	EMC1	0.897143	0.775918	0.910615	0.914834	0.950476	0.935695	0.856989	0.911515	0.952836	0.883372	0.855241	0.908765
YCL046W	YCL046W
YCL047C	POF1	0.748203	0.810768	0.875219	0.813537	0.830849	0.859857	0.837996	0.790056	0.781885	0.726706	0.811807	0.848121
YCL048W	SPS22
YCL049C	YCL049C	0.910414	0.664163	0.929269	0.945632	0.946916	0.920258	0.688995	0.899425	0.934305	0.924659	0.688995	0.897283
YCL050C	APA1	0.968024	0.970774	0.985137	0.989529	0.987317	0.989517	0.97478	0.992329	0.983679	0.988879	0.969778	0.984379
YCL051W	LRE1	0.895585	0.820766	0.898394	0.801643	0.876699	0.930464	0.845767	0.820501	0.87387	0.767539	0.788544	0.918075
YCL052C	PBN1	0.970284	0.945957	0.975531	0.962469	0.980159	0.972805	0.943855	0.964023	0.981984	0.964916	0.91273	0.973077
YCL054W	SPB1	0.993536	0.985747	0.993406	0.988669	0.992065	0.993749	0.992437	0.994879	0.994018	0.995094	0.979473	0.993081
YCL055W	KAR4	0.241278	0.172435	0.610506	0.694111	0.0906521	0.355283	0.569669	0.695507	0.0222952	0.347076	0.507967	0.607372
YCL056C	PEX34	0.896809	0.899904	0.93477	0.837517	0.927536	0.938328	0.918735	0.872287	0.846739	0.822587	0.92054	0.935161
YCL057W	PRD1	0.694346	0.851973	0.390053	0.755636	0.807333	0.404056	0.89721	0.802614	0.580445	0.434521	0.913083	0.57162
YCL058C	FYV5
YCL059C	KRR1	0.990442	0.98477	0.994727	0.994012	0.988781	0.994511	0.983839	0.993988	0.990614	0.994421	0.988018	0.994208
YCL061C	MRC1	0.565801	0.520693	0.729224	0.555391	0.65091	0.547356	0.800534	0.596074	0.677571	0.498873	0.752407	0.629734
YCL063W	VAC17	0.617921	0.101446	0.665358	0.617162	0.787526	0.352796	0.860526	0.52088	0.673545	0.398583	0.852739	0.715488
YCL064C	CHA1	-0.456112	-0.720915	0.927125	0.932598	0.977734	0.927125	-0.679371	-0.656778	0.977734	0.932598	-0.720915	-0.587756
YCL065W	YCL065W
YCL066W	HMLALPHA1
YCL067C	HMLALPHA2
YCL068C	YCL068C
YCL069W	VBA3
YCL074W	YCL074W
YCL075W	YCL075W
YCL076W	YCL076W
YCR001W	YCR001W
YCR002C	CDC10	0.857364	0.790008	0.958065	0.874079	0.946942	0.966687	0.836756	0.838491	0.935669	0.933242	0.794055	0.862654
YCR003W	MRPL32	0.729786	0.479523	0.482102	0.824478	0.729786	0.633635	0.859929	0.93982	0.692902	0.871965	0.721803	0.735713
YCR004C	YCP4	0.973519	0.951456	0.994511	0.993029	0.987902	0.992175	0.976651	0.993029	0.964828	0.989424	0.975494	0.994511
YCR005C	CIT2	0.9788	0.981402	0.992237	0.993395	0.973656	0.991214	0.992144	0.993408	0.984715	0.989414	0.983547	0.988712
YCR006C	YCR006C
YCR007C	YCR007C
YCR008W	SAT4	0.598537	0.857107	0.432146	0.618872	0.659944	0.668181	0.893502	0.799913	0.536051	0.792327	0.74197	0.628045
YCR009C	RVS161	0.970925	0.930315	0.974791	0.94816	0.979178	0.975909	0.927968	0.944168	0.953478	0.933654	0.907843	0.96385
YCR010C	ADY2	0.985568	0.974315	0.978691	0.97858	0.985568	0.978691	0.974315	0.978773	0.985568	0.97858	0.974315	0.978691
YCR011C	ADP1	0.972956	0.96565	0.991973	0.991014	0.994392	0.991973	0.969284	0.981753	0.994392	0.991014	0.966385	0.979593
YCR012W	PGK1	0.987249	0.979209	0.979723	0.982763	0.987249	0.979723	0.979209	0.982763	0.987249	0.982763	0.979209	0.979723
YCR013C	YCR013C
YCR014C	POL4	0.433028	0.614506	0.520392	0.672842	0.587589	0.556651	0.81659	0.741109	0.550336	0.629776	0.617149	0.520392
YCR015C	CTO1	0.97819	0.886747	0.957177	0.918746	0.967186	0.964003	0.83808	0.91999	0.968759	0.944756	0.771734	0.964003
YCR016W	YCR016W	0.981228	0.948802	0.987782	0.988303	0.982381	0.984036	0.959092	0.985347	0.987934	0.985273	0.956	0.986733
YCR017C	CWH43	0.342736	0.196576	0.589484	0.477286	0.103595	-0.011804	0.895678	0.465198	0.635042	-0.106069	0.810618	0.583146
YCR018C	SRD1
YCR019W	MAK32	0.876746	0.870185	0.88265	0.466854	0.924166	0.905888	0.822424	0.423223	0.88309	0.457761	0.905721	0.869613
YCR020C	PET18	0.915307	0.758336	0.969083	0.938621	0.97307	0.968145	0.901561	0.9658	0.962899	0.951596	0.801974	0.960113
YCR021C	HSP30	0.939768	0.926181	0.963566	0.971531	0.957747	0.968145	0.900398	0.955375	0.956746	0.971531	0.933737	0.980427
YCR022C	YCR022C
YCR023C	YCR023C	0.954028	0.956188	0.964468	0.977381	0.952693	0.960486	0.967518	0.977297	0.935389	0.971225	0.96622	0.959752
YCR024C	SLM5	0.901153	0.180061	0.892091	0.791888	0.939665	0.876616	0.338837	0.758276	0.949326	0.800551	0.246049	0.862174
YCR025C	YCR025C
YCR026C	NPP1	0.922892	0.763154	0.919521	0.916365	0.939715	0.92619	0.879161	0.907077	0.946044	0.892904	0.839538	0.913328
YCR027C	RHB1	0.832782	0.797976	0.753122	0.383603	0.833821	0.852408	0.568062	0.567393	0.759305	0.456416	0.654795	0.835661
YCR028C	FEN2	0.683103	0.686106	0.731566	0.41329	0.731642	0.799496	0.755151	0.444835	0.627178	0.481996	0.741174	0.757582
YCR030C	SYP1	0.931199	0.904439	0.974393	0.961745	0.953416	0.976757	0.884553	0.945895	0.91936	0.960904	0.863427	0.963181
YCR031C	RPS14A
YCR032W	BPH1	0.946136	0.948573	0.941104	0.967272	0.961711	0.949327	0.943945	0.9633	0.947866	0.968461	0.949885	0.95186
YCR033W	SNT1	0.878481	0.924889	0.898711	0.845697	0.858724	0.90679	0.928158	0.824649	0.842555	0.749502	0.934063	0.930295
YCR034W	ELO2	0.989879	0.991749	0.984929	0.990283	0.989738	0.992121	0.991749	0.992281	0.989879	0.992281	0.986593	0.992121
YCR035C	RRP43	0.812534	0.690752	0.912802	0.898499	0.824391	0.846924	0.886513	0.907305	0.890805	0.847844	0.852327	0.920349
YCR036W	RBK1	0.846902	0.883252	0.847859	0.938914	0.939102	0.901937	0.87906	0.930808	0.889107	0.942708	0.823066	0.841013
YCR037C	PHO87	0.707346	0.331985	0.709232	0.807592	0.354834	-0.0558969	0.749395	0.851089	-0.259343	-0.226918	0.690664	0.585525
YCR038C	BUD5	0.962689	0.958819	0.957018	0.950306	0.960604	0.9574	0.951942	0.944668	0.97173	0.943748	0.958978	0.967558
YCR039C	MATALPHA2
YCR040W	MATALPHA1
YCR041W	YCR041W
YCR042C	TAF2	0.555678	0.712498	0.75163	0.543687	0.615642	0.744536	0.696148	0.462929	0.638221	0.527155	0.719251	0.818658
YCR043C	YCR043C	0.768257	0.843948	0.90875	0.950777	0.879517	0.898253	0.887159	0.950777	0.879517	0.925129	0.887159	0.90875
YCR044C	PER1	-0.0163132	0.645726	0.668954	0.772286	0.740393	0.50458	0.712641	0.825306	0.616152	0.719273	0.822472	0.815606
YCR045C	RRT12
YCR046C	IMG1	0.880745	0.923254	0.871797	0.890581	0.858885	0.868091	0.911245	0.866482	0.858885	0.890581	0.934676	0.875875
YCR047C	BUD23	0.952474	0.935219	0.982657	0.981491	0.959953	0.97995	0.95936	0.955518	0.959632	0.977838	0.955742	0.97122
YCR048W	ARE1	0.753242	0.578418	0.706225	0.818581	0.886171	0.689278	0.866783	0.939441	0.751752	0.886564	0.763847	0.706225
YCR049C	YCR049C
YCR050C	YCR050C
YCR051W	YCR051W	0.97193	0.976175	0.993359	0.985773	0.985995	0.988943	0.976168	0.984368	0.985995	0.983827	0.964284	0.986478
YCR052W	RSC6	0.825247	0.741521	0.71821	0.522161	0.878529	0.90682	0.603017	0.628615	0.822683	0.666941	0.76225	0.879479
YCR053W	THR4	0.981501	0.964255	0.991671	0.983335	0.98839	0.99086	0.977363	0.978817	0.981501	0.978212	0.977363	0.991671
YCR054C	CTR86	0.798162	0.716474	0.92034	0.903861	0.708364	0.808482	0.892786	0.90077	0.785371	0.845707	0.822468	0.910331
YCR057C	PWP2	0.993652	0.991236	0.990958	0.994203	0.986308	0.991973	0.988877	0.993348	0.986008	0.994314	0.988725	0.993381
YCR059C	YIH1	0.964612	0.951995	0.961763	0.970175	0.951019	0.966764	0.941133	0.964934	0.948979	0.972308	0.936253	0.969941
YCR060W	TAH1	0.783829	0.772836	0.825276	0.869058	0.785907	0.846468	0.840526	0.865082	0.764085	0.795082	0.80349	0.880092
YCR061W	YCR061W	0.837045	0.60403	0.91866	0.958955	0.843975	0.903444	0.582053	0.917415	0.802883	0.916366	0.724023	0.900196
YCR063W	BUD31
YCR064C	YCR064C
YCR065W	HCM1	0.666543	0.786701	0.79869	0.543204	0.674417	0.776552	0.88395	0.766173	0.578005	0.628642	0.830744	0.742214
YCR066W	RAD18	0.212768	0.61454	0.758145	0.681115	0.749809	0.611835	0.6237	0.546627	0.817999	0.500347	0.704215	0.377074
YCR067C	SED4	0.483684	0.518905	0.772671	0.806766	0.77371	0.70255	0.470098	0.544356	0.792185	0.791071	0.341451	0.649204
YCR068W	ATG15
YCR069W	CPR4	0.943714	0.948869	0.962764	0.975038	0.943714	0.955884	0.939526	0.969382	0.914233	0.966114	0.969456	0.977828
YCR071C	IMG2	0.512232	0.472079	0.797022	0.601087	0.799622	0.825951	0.658775	0.650764	0.571399	0.579909	0.511153	0.143887
YCR072C	RSA4	0.978129	0.983985	0.977554	0.99068	0.975253	0.982423	0.98316	0.99068	0.981151	0.992666	0.988371	0.989164
YCR073C	SSK22	0.679191	0.429824	0.352626	0.606578	0.826195	0.698768	0.587565	0.668911	0.330529	-0.336146	0.576965	0.462312
YCR075C	ERS1	0.984361	0.966171	0.985637	0.983237	0.980492	0.984631	0.962739	0.978586	0.984086	0.987671	0.957359	0.984631
YCR076C	FUB1	0.956999	0.909352	0.984072	0.982193	0.980359	0.983444	0.929049	0.965778	0.981791	0.975843	0.909485	0.968492
YCR077C	PAT1	0.709473	0.711091	0.228732	0.610472	0.839175	0.583775	0.8676	0.62355	0.483567	0.597883	0.889769	0.633117
YCR079W	PTC6	0.979926	0.971511	0.980023	0.963737	0.979047	0.977767	0.967952	0.972817	0.967356	0.965433	0.955871	0.979379
YCR081W	SRB8
YCR082W	AHC2	0.445629	0.381941	0.491525	0.7532	0.766166	0.815806	0.45495	0.744606	0.36906	0.771408	0.586192	0.459196
YCR083W	TRX3	0.842178	0.905931	0.925402	0.969406	0.901017	0.908001	0.980655	0.987739	0.898475	0.984424	0.952157	0.910281
YCR084C	TUP1	0.906904	0.563179	0.883181	0.834845	0.921532	0.914006	0.669582	0.814137	0.896464	0.79315	0.753212	0.898861
YCR085W	YCR085W
YCR086W	CSM1	0.881677	0.781645	0.935083	0.920608	0.86005	0.926344	0.774108	0.897005	0.877726	0.92251	0.701086	0.901871
YCR087W	YCR087W
YCR088W	ABP1	0.903301	0.901109	0.895958	0.789263	0.791096	0.946545	0.919652	0.876665	0.935669	0.933242	0.903437	0.967768
YCR089W	FIG2	0.620188	0.95131	0.842622	0.850599	0.770409	0.818048	0.95248	0.940679	0.713932	0.91789	0.952667	0.854087
YCR090C	YCR090C	0.757293	0.491163	0.837717	0.0787471	0.772519	0.889297	0.703844	0.841137	0.788795	0.280829	0.284717	0.815642
YCR091W	KIN82	0.984539	0.929933	0.981699	0.958066	0.985017	0.982584	0.932831	0.958066	0.984539	0.952451	0.932831	0.981699
YCR092C	MSH3	0.647145	0.848618	0.498569	0.796364	0.744152	0.583695	0.802181	0.749315	0.698251	0.74344	0.8396	0.560771
YCR093W	CDC39	0.885323	0.73558	0.821345	0.897098	0.775224	0.790223	0.775589	0.870205	0.851124	0.833839	0.887927	0.868848
YCR094W	CDC50	-0.0263623	0.423481	0.45437	0.45333	0.393827	0.395052	0.61307	0.502966	0.412923	0.224894	0.512522	0.42866
YCR095C	OCA4	0.580797	0.564879	0.763063	0.645228	0.568367	0.689182	0.616304	0.720333	0.533313	0.758824	0.663822	0.756174
YCR096C	HMRA2
YCR098C	GIT1	0.888137	0.873787	0.955193	0.975487	0.901789	0.905374	0.958666	0.975487	0.874408	0.883697	0.949514	0.93507
YCR099C	YCR099C
YCR100C	EMA35
YCR101C	YCR101C
YCR102C	YCR102C
YCR104W	PAU3
YCR105W	ADH7
YCR106W	RDS1
YCR107W	AAD3	0.916013	0.800633	0.907905	0.954636	0.931506	0.899783	0.824835	0.950217	0.906345	0.945396	0.824962	0.902431
YDL001W	RMD1	0.892911	0.842416	0.742139	0.936817	0.870476	0.78103	0.833559	0.94133	0.880189	0.927776	0.844133	0.740249
YDL002C	NHP10	0.728194	0.674431	0.719433	0.760662	0.734047	0.723505	0.676214	0.795496	0.717801	0.661001	0.497456	0.755553
YDL003W	MCD1	0.848168	0.722022	0.668057	0.672859	0.900131	0.810326	0.731947	0.771203	0.826824	0.73934	0.7184	0.650141
YDL004W	ATP16	0.936808	0.840888	0.967471	0.957635	0.971542	0.968391	0.922923	0.973778	0.971542	0.970477	0.873145	0.955043
YDL005C	MED2	0.860696	0.740728	0.692041	0.651955	0.84007	0.756676	0.815909	0.608842	0.750789	0.556716	0.816343	0.747337
YDL006W	PTC1	0.647263	0.723733	0.598685	0.595	0.932277	0.938115	0.673241	0.607176	0.770626	0.333341	0.651787	0.821286
YDL007W	RPT2	0.817419	0.833683	0.685608	0.65599	0.759679	0.635583	0.799504	0.872027	0.761077	0.805503	0.724799	0.696198
YDL008W	APC11
YDL009C	YDL009C
YDL010W	GRX6	0.968027	0.943648	0.939095	0.971039	0.969942	0.94619	0.966897	0.966071	0.978303	0.972274	0.950797	0.929169
YDL011C	YDL011C
YDL012C	YDL012C	0.930015	0.423735	0.599831	0.572712	0.968218	0.970381	0.737888	0.822834	0.772821	0.570326	0.311949	0.897381
YDL013W	SLX5	0.883442	0.894271	0.89854	0.93506	0.927919	0.888779	0.929433	0.949572	0.899927	0.94707	0.929127	0.87194
YDL014W	NOP1	0.998011	0.99585	0.998261	0.998779	0.998011	0.998167	0.99585	0.998114	0.998011	0.998114	0.99585	0.998167
YDL015C	TSC13	0.854002	0.851793	0.867025	0.865289	0.832973	0.744372	0.894064	0.855327	0.79362	0.83479	0.817653	0.761146
YDL016C	YDL016C
YDL017W	CDC7	0.462958	0.662391	-0.0355071	0.851814	0.608798	0.460721	0.283844	0.328531	0.313093	0.0686301	0.497201	0.454246
YDL018C	ERP3	0.674987	0.680281	0.891793	0.615494	0.915218	0.951434	0.634171	0.494356	0.775683	0.522377	0.680281	0.769064
YDL019C	OSH2	0.95757	0.960131	0.96743	0.974723	0.964907	0.965519	0.958296	0.973554	0.935614	0.973125	0.950862	0.956839
YDL020C	RPN4	0.138415	0.572998	0.842349	0.804347	0.887548	0.900819	0.679055	0.700773	0.836342	0.784994	0.625065	0.484104
YDL021W	GPM2	0.991655	0.948451	0.993042	0.990557	0.991655	0.991696	0.943127	0.986442	0.989173	0.988767	0.963799	0.99433
YDL022W	GPD1	0.992627	0.864935	0.987711	0.993293	0.992627	0.987711	0.876717	0.993293	0.992627	0.993293	0.876717	0.987711
YDL023C	YDL023C
YDL024C	DIA3	0.984832	0.951896	0.971914	0.990696	0.974265	0.966434	0.964159	0.990477	0.981938	0.990406	0.946062	0.958252
YDL025C	RTK1	0.976243	0.960548	0.977228	0.981838	0.977654	0.976595	0.972108	0.981838	0.977929	0.980296	0.973502	0.979927
YDL026W	YDL026W
YDL027C	MRX9	0.989576	0.970948	0.993044	0.989297	0.988325	0.990792	0.971213	0.987584	0.988372	0.981056	0.973958	0.990741
YDL028C	MPS1	0.922533	0.872469	0.93414	0.858397	0.919145	0.913714	0.886393	0.853498	0.902561	0.867986	0.838452	0.939957
YDL029W	ARP2	0.768681	0.872095	0.934196	0.949688	0.851814	0.917886	0.938763	0.948199	0.830102	0.927088	0.887601	0.922628
YDL030W	PRP9	0.690858	0.890731	0.567204	0.867794	0.66531	0.657254	0.909563	0.922456	0.740315	0.853702	0.738925	0.548756
YDL031W	DBP10	0.979237	0.983957	0.989164	0.992318	0.985033	0.989004	0.984453	0.993149	0.982012	0.991378	0.978938	0.987847
YDL032W	YDL032W
YDL033C	SLM3
YDL034W	YDL034W
YDL035C	GPR1	0.957456	0.911176	0.499438	0.554318	0.957456	0.943417	0.85673	0.554318	0.784867	0.554318	0.911176	0.943417
YDL036C	PUS9	0.192975	-0.301746	-0.54424	-0.529143	0.928411	0.952464	0.878619	0.829214	-0.391371	-0.470044	-0.592588	-0.471611
YDL037C	BSC1
YDL039C	PRM7
YDL040C	NAT1	0.8777	0.896289	0.965633	0.971458	0.896301	0.912281	0.938801	0.976639	0.873284	0.960065	0.894911	0.932518
YDL041W	YDL041W
YDL042C	SIR2	0.801646	0.596888	0.904801	0.841248	0.686775	0.89101	0.525562	0.847889	0.827392	0.823996	0.638157	0.874519
YDL043C	PRP11	0.571424	0.55554	-0.672302	-0.450009	0.330491	0.739744	0.498669	0.795992	-0.0920471	0.584528	0.207052	0.227577
YDL044C	MTF2	0.76199	0.465411	0.683161	0.546182	0.821703	0.640491	0.642493	0.47289	0.857811	0.481881	0.527103	0.570611
YDL045C	FAD1	0.960724	0.8712	0.966276	0.932923	0.971373	0.968795	0.856149	0.923947	0.940388	0.928753	0.858589	0.964577
YDL046W	NPC2	0.961879	0.973497	0.973356	0.987884	0.976143	0.979516	0.981649	0.989096	0.976012	0.989775	0.978051	0.970249
YDL047W	SIT4	0.651943	0.655484	0.46037	0.802528	0.76865	0.616896	0.735433	0.843351	0.72652	0.801439	0.630711	0.528414
YDL048C	STP4	0.954611	0.917853	0.917174	0.947231	0.971313	0.930767	0.930272	0.956481	0.965407	0.954983	0.917208	0.906808
YDL049C	KNH1	0.966238	0.963639	0.973262	0.976487	0.970203	0.974751	0.96986	0.97197	0.978635	0.978818	0.971431	0.972108
YDL050C	YDL050C
YDL051W	LHP1	0.996367	0.992508	0.995883	0.997072	0.993602	0.994293	0.992717	0.997157	0.993953	0.992968	0.986155	0.993332
YDL052C	SLC1	0.876592	0.815943	0.853106	0.854105	0.876592	0.853106	0.75795	0.868085	0.92399	0.90333	0.859776	0.896286
YDL053C	PBP4	0.646148	0.583378	0.86272	0.760821	0.911424	0.841721	0.750034	0.592091	0.800599	0.269618	0.661966	0.802194
YDL054C	MCH1	0.961252	0.972682	0.974181	0.97376	0.963925	0.974778	0.972089	0.976738	0.969251	0.975732	0.975713	0.975881
YDL055C	PSA1	0.905678	0.585167	0.953043	0.965868	0.908531	0.868846	0.692835	0.892501	0.890079	0.906871	0.692835	0.897624
YDL056W	MBP1	0.792948	0.691491	0.748799	0.416865	0.846877	0.774472	0.735146	0.601512	0.838578	0.34135	0.612764	0.583146
YDL057W	YDL057W	0.991598	0.971119	0.984213	0.964124	0.989091	0.987683	0.951003	0.959553	0.985662	0.971345	0.964462	0.985597
YDL058W	USO1	0.760506	0.895083	0.679134	0.693298	0.834666	0.741369	0.707003	0.663028	0.735142	0.675869	0.862824	0.664256
YDL059C	RAD59	0.991105	0.992799	0.992847	0.992402	0.992415	0.992847	0.992799	0.990168	0.992415	0.992402	0.992799	0.9905
YDL060W	TSR1	0.991122	0.993792	0.993312	0.988897	0.985198	0.990599	0.994138	0.99655	0.990603	0.99524	0.989822	0.992155
YDL061C	RPS29B	0.997922	0.993596	0.998795	0.998174	0.997569	0.99871	0.997002	0.998575	0.997922	0.998109	0.989659	0.997935
YDL062W	YDL062W
YDL063C	SYO1	0.98709	0.993888	0.990553	0.99463	0.98709	0.993439	0.994839	0.995494	0.981667	0.99463	0.993888	0.993439
YDL064W	UBC9	0.936697	0.901084	0.860974	0.830265	0.936697	0.899276	0.787208	0.823177	0.897109	0.837543	0.901084	0.899276
YDL065C	PEX19	0.897785	0.854758	0.815936	0.614334	0.864463	0.847257	0.895811	0.53338	0.737463	0.534318	0.930219	0.800677
YDL066W	IDP1	0.90361	0.915209	0.946022	0.958162	0.931812	0.952755	0.923034	0.954765	0.939409	0.964639	0.9303	0.948467
YDL067C	COX9	0.96622	0.936789	0.985058	0.975071	0.962386	0.97653	0.974176	0.965289	0.962386	0.956117	0.974176	0.985058
YDL068W	YDL068W
YDL069C	CBS1	0.876219	0.883998	0.933033	0.898061	0.898176	0.911338	0.910479	0.904336	0.897839	0.888846	0.893637	0.919636
YDL070W	BDF2	0.848368	0.947439	0.856772	0.864118	0.891223	0.891521	0.904322	0.841955	0.850037	0.855504	0.941271	0.881276
YDL071C	YDL071C
YDL072C	YET3	0.910647	0.592157	0.960406	0.945577	0.886551	0.96073	0.585343	0.97091	0.920954	0.959744	0.628768	0.980181
YDL073W	AHK1	0.808363	0.736746	0.681415	0.678589	0.762204	0.720275	0.7117	0.706188	0.779534	0.588419	0.694002	0.671019
YDL074C	BRE1	0.797657	0.920138	0.82289	0.784248	0.7522	0.798928	0.922425	0.774087	0.817591	0.678754	0.922425	0.74828
YDL075W	RPL31A	0.999066	0.997103	0.999547	0.999546	0.999119	0.999322	0.997284	0.999208	0.999377	0.999474	0.99684	0.999123
YDL076C	RXT3	0.919805	0.938259	0.951804	0.965724	0.966719	0.959789	0.934144	0.971568	0.964027	0.965724	0.902268	0.941137
YDL077C	VAM6	0.68902	0.789062	0.826398	0.837137	0.793544	0.846108	0.828674	0.81383	0.733783	0.840524	0.83437	0.79909
YDL078C	MDH3	0.983002	0.989365	0.977473	0.989013	0.98426	0.977473	0.989365	0.993838	0.985014	0.996037	0.990324	0.975157
YDL079C	MRK1	0.976349	0.91257	0.964397	0.964024	0.975798	0.964397	0.921664	0.97562	0.985296	0.983413	0.938866	0.969325
YDL080C	THI3	0.842579	0.855317	0.933893	0.825416	0.896219	0.932579	0.883556	0.792111	0.827206	0.801404	0.886323	0.932662
YDL081C	RPP1A	0.996136	0.996738	0.997817	0.99888	0.996374	0.997817	0.996738	0.99888	0.996136	0.99888	0.996738	0.997817
YDL082W	RPL13A	0.998725	0.996133	0.999035	0.998975	0.998725	0.998688	0.996133	0.998786	0.998904	0.999058	0.997568	0.998989
YDL083C	RPS16B	0.999475	0.997804	0.999372	0.999487	0.999475	0.999372	0.997804	0.999487	0.999475	0.999487	0.997804	0.999372
YDL084W	SUB2	0.984426	0.954166	0.963137	0.974511	0.987682	0.969278	0.954054	0.980713	0.983635	0.976503	0.954166	0.964037
YDL085W	NDE2	0.986213	0.967644	0.992597	0.990558	0.994739	0.994965	0.970527	0.988507	0.993538	0.990569	0.965959	0.983326
YDL086W	YDL086W	0.944807	0.846362	0.935393	0.950089	0.950598	0.938654	0.807322	0.951561	0.963465	0.958516	0.835171	0.921197
YDL087C	LUC7
YDL088C	ASM4	0.437656	0.596515	0.568026	0.591708	0.762571	0.398147	0.771628	0.58951	0.884889	0.751537	0.702374	0.617964
YDL089W	NUR1	0.859005	0.890518	0.901792	0.948891	0.880448	0.901388	0.916463	0.949418	0.834739	0.93394	0.897509	0.918673
YDL090C	RAM1	0.92269	0.88661	0.928879	0.92665	0.937881	0.940599	0.825449	0.922315	0.942097	0.919824	0.896231	0.932761
YDL091C	UBX3	0.985162	0.96388	0.981469	0.971813	0.990671	0.985522	0.972289	0.97552	0.987221	0.976672	0.96388	0.983589
YDL092W	SRP14	0.721163	0.71158	0.903433	0.920775	0.780788	0.874115	0.907141	0.944741	0.740326	0.799666	0.821672	0.895634
YDL093W	PMT5	0.169096	0.846684	0.49425	0.853663	0.732653	0.650343	0.843875	0.903523	0.0535878	0.748893	0.833587	0.582046
YDL094C	YDL094C
YDL095W	PMT1	0.94079	0.779409	0.958666	0.972698	0.95713	0.958666	0.811398	0.977408	0.982272	0.986106	0.767926	0.9194
YDL096C	OPI6
YDL097C	RPN6	0.865155	0.616404	0.859532	0.883467	0.843279	0.894486	0.60361	0.883467	0.59447	0.872229	0.624784	0.941481
YDL098C	SNU23	0.457858	0.680442	0.504812	0.549442	0.673103	0.380791	0.727995	0.554154	0.722544	0.365007	0.615708	0.469031
YDL099W	BUG1	0.497014	0.74191	0.480675	0.586953	0.620219	0.480623	0.713518	0.480007	0.707089	0.63947	0.747772	0.619679
YDL100C	GET3	0.953826	0.939811	0.960567	0.949032	0.952459	0.958128	0.902221	0.896489	0.952459	0.859149	0.895418	0.944981
YDL101C	DUN1	0.637534	0.580054	0.8505	0.669538	0.643135	0.903932	0.556165	0.756754	0.705825	0.667276	0.501792	0.887845
YDL102W	POL3	0.891733	0.32057	0.819156	0.846154	0.893375	0.833894	0.483979	0.796411	0.89931	0.872063	0.421607	0.8321
YDL103C	QRI1	0.402671	0.817004	0.366933	0.467516	0.834831	0.86724	0.867957	0.747229	0.527616	0.66348	0.846575	0.368348
YDL104C	QRI7	0.950826	0.979413	0.931841	0.968953	0.946238	0.94071	0.961136	0.971242	0.935093	0.971242	0.953281	0.94071
YDL105W	NSE4	0.67163	0.897982	0.590007	0.789634	0.789449	0.724055	0.957145	0.861231	0.718686	0.802365	0.890134	0.577357
YDL106C	PHO2	0.715925	0.944823	0.908717	0.936782	0.796575	0.904447	0.960702	0.935749	0.775581	0.890077	0.950161	0.903528
YDL107W	MSS2	0.926041	0.88115	0.939275	0.925398	0.952412	0.93272	0.872812	0.932266	0.943295	0.931743	0.866184	0.933664
YDL108W	KIN28	0.784732	0.373758	0.798932	0.800086	0.885762	0.858224	0.330425	0.629745	0.861555	0.800086	0.40924	0.791812
YDL109C	YDL109C
YDL110C	TMA17	0.990948	0.985709	0.994212	0.994695	0.991443	0.993796	0.992567	0.99651	0.993493	0.993167	0.990613	0.995872
YDL111C	RRP42	0.945216	0.893033	0.966581	0.976389	0.96261	0.966581	0.907438	0.965764	0.96261	0.976389	0.915663	0.956893
YDL112W	TRM3	0.986865	0.95648	0.990628	0.988922	0.985036	0.989448	0.96473	0.986451	0.979839	0.984253	0.956786	0.990198
YDL113C	ATG20	0.977632	0.97034	0.976724	0.982164	0.98752	0.982962	0.978323	0.987568	0.98562	0.978765	0.97034	0.979908
YDL114W	YDL114W	0.955493	0.947892	0.919184	0.918788	0.968247	0.923617	0.949112	0.916886	0.97121	0.933413	0.921799	0.893651
YDL115C	IWR1	0.961997	0.920264	0.975732	0.934215	0.972505	0.977903	0.953386	0.939796	0.963383	0.933005	0.934264	0.948186
YDL116W	NUP84	0.599048	0.625543	0.756386	0.77303	0.777655	0.637239	0.374445	0.723163	0.741353	0.679161	0.374445	0.618188
YDL117W	CYK3	0.745443	0.312184	0.823319	0.810121	0.68772	0.823166	0.539406	0.856031	0.766415	0.769106	0.848992	0.764529
YDL118W	YDL118W
YDL119C	HEM25	0.865856	0.824964	0.836743	0.94167	0.871695	0.839094	0.854529	0.955048	0.835701	0.936257	0.852053	0.827981
YDL120W	YFH1
YDL121C	EXP1	0.957441	0.930515	0.975785	0.971021	0.990377	0.981829	0.946901	0.971829	0.979108	0.953687	0.927202	0.976623
YDL122W	UBP1	0.963396	0.909365	0.962528	0.94532	0.967826	0.980241	0.901485	0.954137	0.939841	0.959938	0.90655	0.959415
YDL123W	SNA4	0.950448	0.751862	0.971458	0.928287	0.958707	0.972261	0.827176	0.927993	0.947102	0.922678	0.789475	0.960799
YDL124W	YDL124W	0.9821	0.658829	0.98997	0.990007	0.988045	0.98997	0.682099	0.986919	0.988045	0.990007	0.880453	0.991008
YDL125C	HNT1	0.608453	0.84414	0.712236	0.92874	0.739095	0.763787	0.886953	0.952633	0.72092	0.924672	0.840442	0.677036
YDL126C	CDC48	0.659482	0.861538	0.716341	0.82599	0.72475	0.840485	0.845085	0.82599	0.843156	0.872626	0.929018	0.91239
YDL127W	PCL2	0.681001	0.653703	0.733707	0.836268	0.845102	0.713795	0.807619	0.777347	0.822841	0.787709	0.814196	0.611993
YDL128W	VCX1	0.863671	0.90693	0.874227	0.772448	0.873091	0.912466	0.890948	0.826637	0.837075	0.770709	0.909891	0.886383
YDL129W	YDL129W	0.734723	0.386181	0.918937	0.923847	0.926155	0.907989	0.450975	0.711645	0.923198	0.918889	0.543953	0.794458
YDL130W	RPP1B	0.999181	0.997914	0.998085	0.999225	0.999181	0.998703	0.998386	0.999556	0.998532	0.999497	0.997914	0.998504
YDL131W	LYS21	0.980223	0.996004	0.955266	0.960122	0.969914	0.963496	0.997076	0.988323	0.980223	0.983683	0.976312	0.955266
YDL132W	CDC53	0.847244	0.752604	0.933438	0.836276	0.905873	0.938419	0.864087	0.86786	0.880411	0.821508	0.806716	0.934778
YDL133W	SRF1	0.926233	0.881947	0.887502	0.951996	0.908281	0.914309	0.86198	0.948229	0.910604	0.901303	0.838618	0.91813
YDL134C	PPH21	0.808328	0.267647	0.874326	0.727055	0.961708	0.926664	0.714344	0.7705	0.636	0.623908	0.137715	0.722734
YDL135C	RDI1	0.220789	0.65639	0.740999	0.847563	0.663592	0.624395	0.735817	0.588702	0.444655	0.76664	0.680751	0.563696
YDL136W	RPL35B
YDL137W	ARF2	0.970526	0.977563	0.983409	0.980165	0.980028	0.986456	0.9752	0.980165	0.97153	0.981088	0.984808	0.986855
YDL138W	RGT2	0.9653	0.959455	0.963961	0.922665	0.966551	0.976362	0.975271	0.935858	0.955166	0.913966	0.966639	0.970168
YDL139C	SCM3	0.941445	0.92732	0.950065	0.940611	0.928728	0.945893	0.927882	0.930869	0.945562	0.922407	0.943144	0.939714
YDL140C	RPO21	0.963224	0.860609	0.98032	0.981836	0.983782	0.98032	0.861133	0.962207	0.983782	0.981836	0.874924	0.960427
YDL141W	BPL1	0.727936	0.654875	0.676872	0.668084	0.804593	0.327275	0.834999	0.614691	0.658551	0.599902	0.807378	0.71842
YDL142C	CRD1	0.958696	0.852579	0.958193	0.890147	0.973202	0.981656	0.901576	0.913464	0.975477	0.900064	0.851614	0.969182
YDL143W	CCT4	0.974175	0.969664	0.987921	0.980889	0.991833	0.994033	0.983355	0.989746	0.980279	0.989503	0.981841	0.988019
YDL144C	YDL144C	0.947378	0.937406	0.963188	0.937329	0.962834	0.972484	0.952307	0.953731	0.958494	0.956831	0.937099	0.946584
YDL145C	COP1	0.931829	0.190567	0.949005	0.635918	0.98432	0.966596	0.83526	0.721388	0.92039	0.525287	0.549003	0.930631
YDL146W	LDB17	0.911639	0.606102	0.922612	0.913238	0.93323	0.937212	0.587261	0.915383	0.930508	0.950229	0.479447	0.932143
YDL147W	RPN5	0.926926	0.69958	0.923769	0.931715	0.895399	0.820726	0.687066	0.931715	0.832857	0.905325	0.687066	0.923769
YDL148C	NOP14	0.988648	0.989868	0.993931	0.993886	0.988648	0.993931	0.986426	0.993885	0.994394	0.994201	0.991507	0.994658
YDL149W	ATG9	0.988059	0.969477	0.991491	0.990843	0.987407	0.988275	0.98442	0.990843	0.988931	0.982853	0.98442	0.991491
YDL150W	RPC53	0.983755	0.977266	0.994547	0.983959	0.983923	0.992648	0.980285	0.987327	0.985043	0.979702	0.971144	0.990557
YDL151C	BUD30
YDL152W	YDL152W
YDL153C	SAS10	0.97753	0.975649	0.988848	0.9902	0.989487	0.989936	0.993199	0.993622	0.979575	0.990003	0.980453	0.988442
YDL154W	MSH5	0.892114	0.798401	0.90572	0.883347	0.920898	0.89264	0.854596	0.907685	0.908306	0.887409	0.782646	0.8895
YDL155W	CLB3	0.532504	0.818513	0.406495	0.793608	0.764868	0.546871	0.89669	0.853627	0.493473	0.766011	0.8896	0.459867
YDL156W	CMR1
YDL157C	YDL157C	0.929142	0.883787	0.958259	0.806557	0.965504	0.984077	0.8216	0.859159	0.971677	0.80691	0.885799	0.973525
YDL158C	YDL158C
YDL159W	STE7	0.906427	0.961207	0.900606	0.937536	0.896985	0.912597	0.948036	0.946407	0.882817	0.921584	0.968395	0.909651
YDL160C	DHH1
YDL161W	ENT1	0.579137	0.455668	0.649356	0.741322	0.694286	0.681745	0.831346	0.479311	0.738513	0.695821	0.769204	0.712465
YDL162C	YDL162C
YDL163W	YDL163W
YDL164C	CDC9	0.807917	0.519622	0.826123	0.818261	0.907188	0.816379	0.630841	0.790349	0.837339	0.765438	0.630841	0.738499
YDL165W	CDC36	0.693697	0.928141	0.74216	0.94395	0.56457	0.778459	0.947316	0.960559	0.693697	0.957506	0.871199	0.684033
YDL166C	FAP7	0.972322	0.951391	0.968237	0.968256	0.970464	0.979507	0.955169	0.970703	0.947033	0.959288	0.954616	0.974329
YDL167C	NRP1	0.984462	0.986144	0.990473	0.98721	0.986624	0.988287	0.988558	0.989604	0.982255	0.986747	0.986417	0.987713
YDL168W	SFA1	0.962335	0.941527	0.785062	0.327226	0.942065	0.925241	0.839209	0.420624	0.83371	0.293434	0.933539	0.898069
YDL169C	UGX2	0.993516	0.988991	0.996468	0.996332	0.995492	0.996891	0.986192	0.99528	0.993782	0.995013	0.984324	0.994922
YDL170W	UGA3	0.985191	0.973044	0.98736	0.989343	0.987677	0.985973	0.987962	0.988463	0.981199	0.984191	0.973044	0.98262
YDL171C	GLT1	0.932404	0.9887	0.922972	0.94556	0.932404	0.934377	0.988942	0.959221	0.927907	0.94556	0.9887	0.934377
YDL172C	YDL172C
YDL173W	PAR32	0.680502	0.908052	0.644845	0.845405	0.667447	0.738123	0.967629	0.934834	0.455606	0.845973	0.74065	0.59099
YDL174C	DLD1	0.969203	0.894449	0.987771	0.989768	0.981463	0.978899	0.931473	0.987538	0.972792	0.98418	0.933958	0.974872
YDL175C	AIR2	0.78881	0.938934	0.858365	0.941014	0.820463	0.847971	0.942065	0.945484	0.820161	0.938984	0.948395	0.861982
YDL176W	YDL176W	0.973062	0.964985	0.96623	0.971487	0.973846	0.970574	0.976317	0.970907	0.952435	0.967764	0.970906	0.968441
YDL177C	YDL177C	0.860367	0.923623	0.775449	0.859953	0.954363	0.788529	0.911294	0.853145	0.951428	0.884052	0.923623	0.715498
YDL178W	DLD2	0.713187	0.66367	0.733318	0.671157	0.786547	0.669817	0.87448	0.799375	0.723694	0.602574	0.216224	0.781898
YDL179W	PCL9	0.962017	0.950582	0.937668	0.94357	0.962017	0.937668	0.96572	0.94357	0.962017	0.94357	0.951412	0.939151
YDL180W	YDL180W	0.952682	0.847545	0.959306	0.842652	0.972799	0.969782	0.8836	0.891526	0.973686	0.874489	0.742764	0.962459
YDL181W	INH1	0.976868	0.901043	0.974797	0.979338	0.986685	0.975548	0.931322	0.979338	0.976868	0.965105	0.931322	0.974797
YDL182W	LYS20	0.739274	0.983957	0.944483	0.987764	0.739274	0.916403	0.993026	0.987764	0.696404	0.971197	0.993026	0.944483
YDL183C	YDL183C	0.980505	0.939214	0.977692	0.983383	0.980505	0.976409	0.97185	0.982548	0.97963	0.979771	0.971455	0.97688
YDL184C	RPL41A
YDL185W	VMA1
YDL186W	YDL186W
YDL187C	YDL187C
YDL188C	PPH22	0.767575	0.716695	0.791436	0.367498	0.651114	0.788514	0.698468	0.628642	0.710089	0.624432	0.56295	0.792425
YDL189W	RBS1	0.520358	0.781103	0.704157	0.49647	0.913076	0.891149	0.72711	0.66621	0.544875	0.659297	0.565378	0.715734
YDL190C	UFD2	0.571195	0.611048	0.440858	0.157682	0.759585	0.579515	0.716278	0.722532	0.640553	0.649685	0.30258	0.485473
YDL191W	RPL35A	0.997066	0.993902	0.995809	0.997478	0.997109	0.996189	0.994059	0.998544	0.997414	0.998325	0.992913	0.995809
YDL192W	ARF1	0.981414	0.979261	0.987674	0.988845	0.984895	0.985726	0.984035	0.987874	0.978832	0.98397	0.993463	0.992835
YDL193W	NUS1	-0.235346	0.539622	0.688732	0.728426	0.624117	0.617595	0.374183	-0.237047	0.674242	0.733324	0.626089	-0.215597
YDL194W	SNF3	0.945483	0.868977	0.953607	0.876489	0.92782	0.939252	0.858675	0.871175	0.92782	0.833164	0.833854	0.940379
YDL195W	SEC31	0.7833	0.756796	0.926772	0.856638	0.842268	0.905481	0.719605	0.806678	0.841563	0.829109	0.736799	0.897339
YDL196W	YDL196W
YDL197C	ASF2	0.892383	0.868392	0.888968	0.726103	0.962816	0.933487	0.863563	0.726736	0.852829	0.696534	0.886034	0.90654
YDL198C	GGC1	0.923774	0.974463	0.974696	0.986382	0.970987	0.977214	0.976328	0.978026	0.970987	0.986382	0.974463	0.948027
YDL199C	YDL199C	0.987399	0.980457	0.990421	0.990788	0.989845	0.989656	0.980457	0.988749	0.990948	0.991996	0.973715	0.987803
YDL200C	MGT1	0.964717	0.979239	0.98612	0.988208	0.979586	0.98612	0.98267	0.988642	0.984088	0.988852	0.973759	0.980652
YDL201W	TRM8	0.990881	0.982114	0.98856	0.99056	0.992632	0.992873	0.984826	0.991239	0.988748	0.990223	0.988043	0.991061
YDL202W	MRPL11	0.762613	0.780088	0.737668	0.413964	0.745649	0.830263	0.788393	0.562141	0.665861	0.378474	0.85391	0.84521
YDL203C	ACK1	0.915594	0.924236	0.897387	0.904284	0.926372	0.887553	0.931496	0.919636	0.928924	0.899622	0.922056	0.882955
YDL204W	RTN2	0.984434	0.939074	0.988321	0.992967	0.988204	0.988015	0.959943	0.994559	0.984047	0.993263	0.943793	0.986579
YDL205C	HEM3	0.825402	0.911518	0.870668	0.86142	0.861553	0.863911	0.941473	0.912506	0.850989	0.903586	0.866405	0.870572
YDL206W	YDL206W	0.498831	0.699143	0.00224441	-0.13531	0.493936	0.322596	0.670657	0.324003	0.44763	0.603036	0.448101	0.644494
YDL207W	GLE1	0.855083	0.854021	0.796257	0.56002	0.822141	0.803026	0.876731	0.808403	0.858707	0.641055	0.822349	0.83125
YDL208W	NHP2	0.996541	0.995199	0.997061	0.996793	0.996912	0.997608	0.995199	0.997454	0.996541	0.997454	0.991412	0.997061
YDL209C	CWC2	0.787105	0.799754	0.29675	-0.0509325	0.496695	0.799572	0.831976	0.6434	0.721161	0.510074	0.204844	0.456499
YDL210W	UGA4	0.991283	0.993229	0.991357	0.990011	0.991266	0.991357	0.995303	0.995466	0.991283	0.988069	0.990864	0.985121
YDL211C	YDL211C	0.583633	0.733388	0.772584	0.48703	0.621863	0.387707	0.736933	0.532944	0.603202	0.664445	0.771428	0.601537
YDL212W	SHR3	0.904808	0.746751	0.74241	0.853008	0.899947	0.870214	0.913165	0.893761	0.796416	0.770939	0.817645	0.829956
YDL213C	NOP6	0.990618	0.991105	0.989394	0.994846	0.995326	0.993232	0.990114	0.993371	0.988602	0.993058	0.990288	0.991477
YDL214C	PRR2	0.934155	0.960819	0.964496	0.983827	0.956197	0.962992	0.973602	0.987836	0.93759	0.980993	0.942647	0.960288
YDL215C	GDH2	0.985864	0.987446	0.989844	0.991397	0.994005	0.992396	0.990146	0.993053	0.988084	0.993053	0.98117	0.989012
YDL216C	RRI1	0.982532	0.971743	0.98498	0.978431	0.989708	0.989236	0.964453	0.972628	0.984184	0.976694	0.974128	0.982626
YDL217C	TIM22	0.70739	0.489864	0.509707	0.63033	0.727996	0.506254	0.776241	0.72794	0.750097	0.691551	0.618442	0.448017
YDL218W	YDL218W	0.756191	0.789776	0.949397	0.877454	0.938007	0.965541	0.556361	0.8348	0.902414	0.858595	0.488365	0.734236
YDL219W	DTD1	0.705564	0.430752	0.86285	0.0459977	0.951391	0.909042	0.82171	0.615299	0.802566	0.0459977	0.430752	0.501019
YDL220C	CDC13	0.728197	0.909473	0.724454	0.917752	0.746907	0.707864	0.956991	0.95394	0.574905	0.922774	0.810257	0.732833
YDL221W	YDL221W
YDL222C	FMP45	0.983878	0.94749	0.98373	0.982008	0.987398	0.987879	0.962549	0.986279	0.987442	0.989565	0.962129	0.970734
YDL223C	HBT1	0.966541	0.936913	0.983179	0.976691	0.987905	0.977992	0.953292	0.973932	0.985599	0.973807	0.946851	0.959557
YDL224C	WHI4	0.911473	0.967389	0.951574	0.968655	0.879077	0.938069	0.970972	0.976664	0.914233	0.970635	0.964565	0.952696
YDL225W	SHS1	0.781017	0.563831	0.55333	0.619829	0.789642	0.544899	0.69916	0.70695	0.732366	0.645845	0.696931	0.590139
YDL226C	GCS1	0.618891	0.814214	0.746442	0.711373	0.869461	0.863997	0.828753	0.754689	0.86287	0.58117	0.623412	0.346622
YDL227C	HO	0.72569	0.715655	0.872233	0.77253	0.688001	0.71902	0.805551	0.876305	0.812404	0.817867	0.387731	0.913174
YDL228C	YDL228C
YDL229W	SSB1	0.997545	0.99559	0.996958	0.997976	0.998701	0.998173	0.99559	0.997976	0.997545	0.997976	0.99559	0.996958
YDL230W	PTP1	0.941082	0.765799	0.967002	0.977526	0.938797	0.959899	0.807926	0.979335	0.941082	0.963866	0.697098	0.96062
YDL231C	BRE4	0.947953	0.893985	0.951593	0.618461	0.986152	0.970968	0.941716	0.638568	0.94521	0.57563	0.919493	0.948034
YDL232W	OST4
YDL233W	MFG1	0.908834	0.913426	0.946879	0.960286	0.911068	0.923913	0.928063	0.946796	0.891587	0.938347	0.939962	0.944146
YDL234C	GYP7	0.990786	0.979736	0.98752	0.986777	0.988448	0.988519	0.981093	0.988792	0.985492	0.984968	0.975756	0.98752
YDL235C	YPD1	0.734482	0.891701	0.855199	0.88901	0.764527	0.758737	0.804227	0.811704	0.668128	0.868082	0.281526	0.167157
YDL236W	PHO13	0.69704	0.90174	0.822017	0.759538	0.87646	0.830534	0.890098	0.595306	0.606292	0.561062	0.890098	0.595342
YDL237W	AIM6	0.9324	0.959921	0.968649	0.972877	0.951171	0.974231	0.976398	0.974137	0.962565	0.966969	0.982525	0.978963
YDL238C	GUD1	0.959293	0.975071	0.994459	0.993029	0.990324	0.994459	0.988886	0.987362	0.990324	0.993029	0.984882	0.988438
YDL239C	ADY3	0.968118	0.980731	0.987067	0.987586	0.986697	0.985749	0.973018	0.980351	0.983647	0.985636	0.971016	0.980797
YDL240W	LRG1	0.908334	0.94148	0.935012	0.93326	0.916238	0.935012	0.959586	0.926531	0.916238	0.93326	0.946568	0.905508
YDL241W	YDL241W	0.929061	0.923582	0.983925	0.880662	0.987838	0.986351	0.923582	0.890963	0.980978	0.913707	0.894844	0.930964
YDL242W	YDL242W
YDL243C	AAD4
YDL244W	THI13
YDL245C	HXT15
YDL246C	SOR2
YDL247W	MPH2
YDL248W	COS7
YDR001C	NTH1	0.992367	0.972631	0.994856	0.996131	0.996786	0.994856	0.97141	0.996131	0.992367	0.996131	0.96981	0.994856
YDR002W	YRB1	0.976638	0.979261	0.981177	0.979044	0.972319	0.958359	0.953997	0.975134	0.976599	0.978156	0.984491	0.982011
YDR003W	RCR2	0.98272	0.958799	0.982601	0.965632	0.985849	0.982236	0.9629	0.969686	0.97428	0.967165	0.918449	0.984371
YDR004W	RAD57	0.940208	0.926326	0.931798	0.889503	0.940839	0.952475	0.951944	0.888017	0.939188	0.889806	0.919222	0.947798
YDR005C	MAF1	0.970202	0.957515	0.949212	0.973321	0.970202	0.960025	0.968402	0.97349	0.976346	0.976289	0.984629	0.971102
YDR006C	SOK1	0.783937	0.78918	0.609862	0.650606	0.783937	0.175696	0.770399	0.471522	0.82061	0.490901	0.84808	0.77415
YDR007W	TRP1	0.9565	0.917775	0.944647	0.95181	0.967864	0.93979	0.943697	0.933361	0.961886	0.951961	0.947233	0.945299
YDR008C	YDR008C
YDR009W	GAL3
YDR010C	YDR010C
YDR011W	SNQ2	0.99069	0.968614	0.98377	0.98675	0.984732	0.986131	0.961397	0.98178	0.958001	0.981941	0.942932	0.987386
YDR012W	RPL4B
YDR013W	PSF1	0.825752	0.885333	0.872326	0.857272	0.863818	0.893711	0.950687	0.940264	0.840162	0.930002	0.950704	0.856274
YDR014W	RAD61	0.90894	0.849166	0.944216	0.778752	0.939545	0.946082	0.809806	0.78934	0.908956	0.781785	0.824878	0.920706
YDR015C	YDR015C
YDR016C	DAD1	0.896225	0.954166	0.973176	0.921159	0.953671	0.965941	0.949949	0.901173	0.947087	0.905297	0.947534	0.959055
YDR017C	KCS1	0.889836	0.824354	0.8098	0.674503	0.891569	0.803565	0.882523	0.695347	0.906525	0.776915	0.838745	0.80639
YDR018C	YDR018C	0.98696	0.92435	0.977956	0.956341	0.989799	0.986747	0.964258	0.965431	0.984725	0.950708	0.955311	0.988299
YDR019C	GCV1	0.966138	0.971988	0.988809	0.993657	0.971934	0.983454	0.985525	0.993657	0.982146	0.98867	0.985666	0.99099
YDR020C	DAS2	0.884247	0.933682	0.855872	0.953456	0.892467	0.860716	0.944775	0.963678	0.894653	0.959623	0.922368	0.857138
YDR021W	FAL1	0.951699	0.898196	0.986872	0.96216	0.945892	0.985855	0.897275	0.964103	0.942518	0.952851	0.883386	0.986189
YDR022C	ATG31	0.988252	0.971775	0.986178	0.975133	0.993744	0.991483	0.971097	0.977427	0.989864	0.975133	0.965404	0.986183
YDR023W	SES1	0.989641	0.976407	0.993639	0.992825	0.97189	0.99004	0.985984	0.992139	0.98355	0.990596	0.981942	0.99399
YDR024W	FYV1
YDR025W	RPS11A
YDR026C	NSI1	0.897748	0.868577	0.903625	0.93732	0.884563	0.926505	0.868577	0.949998	0.897748	0.949998	0.847493	0.91205
YDR027C	VPS54	0.940847	0.921896	0.963329	0.927309	0.958606	0.962316	0.947506	0.896478	0.948004	0.936117	0.903971	0.961819
YDR028C	REG1	0.906971	0.870531	0.835829	0.915543	0.772543	0.852395	0.891892	0.920086	0.869763	0.883493	0.840933	0.8805
YDR029W	YDR029W
YDR030C	RAD28	0.957124	0.784508	0.976868	0.879365	0.960478	0.979027	0.899606	0.928831	0.957124	0.889012	0.650801	0.970647
YDR031W	MIX14	0.974338	0.948238	0.987325	0.987929	0.989877	0.987325	0.950081	0.985157	0.989877	0.987929	0.948238	0.983774
YDR032C	PST2	0.992847	0.965823	0.995206	0.992955	0.989393	0.991148	0.965823	0.989653	0.995299	0.996735	0.962158	0.990335
YDR033W	MRH1	0.900537	0.72197	0.791595	0.7898	0.871061	0.809476	0.785049	0.718571	0.814001	0.5414	0.496231	0.681413
YDR034C	LYS14	0.959288	0.959883	0.987259	0.976459	0.986633	0.986884	0.958196	0.964347	0.979489	0.972278	0.956873	0.969434
YDR035W	ARO3	0.545708	-0.00464855	0.867377	0.844072	0.875544	0.853863	0.859873	0.900582	0.853545	0.205944	0.610166	0.764118
YDR036C	EHD3	0.646817	0.803364	0.692297	0.762119	0.797153	0.696547	0.660285	0.732868	0.617457	0.794823	0.862495	0.800547
YDR037W	KRS1	0.996632	0.964097	0.990332	0.992639	0.99008	0.99242	0.964097	0.992639	0.996632	0.992074	0.957871	0.990332
YDR038C	ENA5
YDR039C	ENA2
YDR040C	ENA1
YDR041W	RSM10	0.925173	0.883167	0.967237	0.928961	0.952107	0.958064	0.841179	0.883702	0.950847	0.901932	0.861626	0.923034
YDR042C	YDR042C
YDR043C	NRG1	0.976337	0.962714	0.977315	0.977381	0.98681	0.981018	0.967684	0.981263	0.979525	0.9801	0.950516	0.973935
YDR044W	HEM13	0.93074	0.935617	0.786918	0.905673	0.912261	0.790326	0.894187	0.895479	0.888279	0.916671	0.578266	0.760271
YDR045C	RPC11	0.960747	0.953765	0.980165	0.979326	0.963084	0.983045	0.96712	0.979326	0.961602	0.968336	0.9772	0.986497
YDR046C	BAP3	0.934303	0.943144	0.959977	0.983859	0.889898	0.962143	0.977109	0.992531	0.934303	0.9631	0.987966	0.971118
YDR047W	HEM12
YDR048C	YDR048C
YDR049W	VMS1	0.594328	0.586895	0.27172	0.273171	0.695864	0.855252	0.554529	0.519496	0.582931	0.485434	0.559473	0.880385
YDR050C	TPI1	0.982547	0.974169	0.952345	0.906168	0.982547	0.952345	0.974169	0.906168	0.982547	0.921269	0.974169	0.952345
YDR051C	DET1	0.774785	0.319104	0.870811	0.881343	0.835387	0.886672	0.447108	0.873316	0.800415	0.904414	0.386917	0.846585
YDR052C	DBF4	0.733305	0.611496	0.756558	0.694728	0.802228	0.753439	0.626403	0.65178	0.657717	0.735292	0.664079	0.802765
YDR053W	YDR053W
YDR054C	CDC34	0.773004	0.719848	0.669772	0.807172	0.773004	0.69353	0.329449	0.807172	0.575359	0.803526	0.719848	0.700135
YDR055W	PST1	-0.378221	0.387669	0.767143	0.889557	0.82124	0.801539	-0.301477	-0.351704	0.653169	0.85776	0.360233	-0.451397
YDR056C	EMC10	0.510847	0.626427	0.852404	0.841898	0.716419	0.906395	0.848668	0.879759	0.637644	0.782487	0.687085	0.861483
YDR057W	YOS9	0.861794	0.853604	0.846304	0.927998	0.890319	0.844557	0.858949	0.932825	0.865735	0.902073	0.834916	0.841294
YDR058C	TGL2	0.983006	0.901089	0.964952	0.976749	0.985343	0.974417	0.916295	0.982532	0.981924	0.984466	0.902835	0.968463
YDR059C	UBC5	0.988503	0.964258	0.993167	0.992631	0.994115	0.992468	0.976783	0.992164	0.991727	0.990623	0.976353	0.984824
YDR060W	MAK21	0.99242	0.989591	0.995225	0.99623	0.99315	0.991775	0.990603	0.994551	0.99063	0.99289	0.990537	0.991387
YDR061W	YDR061W	0.930912	0.908185	0.887925	0.542888	0.953507	0.973733	0.825893	0.676044	0.833625	0.616302	0.917157	0.970806
YDR062W	LCB2	0.970172	0.662457	0.94051	0.894753	0.964413	0.916886	0.751693	0.869504	0.976398	0.939586	0.77709	0.912023
YDR063W	AIM7	0.878444	0.69057	0.951131	0.941628	0.894193	0.922468	0.76176	0.896509	0.873757	0.935026	0.726371	0.931001
YDR064W	RPS13	0.998968	0.997143	0.999258	0.999194	0.999386	0.999465	0.995787	0.998935	0.999647	0.99929	0.997143	0.999304
YDR065W	RRG1
YDR066C	RTR2	0.952786	0.962177	0.955987	0.968289	0.958329	0.963708	0.979947	0.974381	0.962999	0.96741	0.943828	0.95298
YDR067C	OCA6	0.941883	0.946513	0.948331	0.960365	0.957185	0.960774	0.947418	0.959726	0.945727	0.947753	0.932428	0.955489
YDR068W	DOS2	0.711756	0.825152	0.900724	0.855729	0.699005	0.766563	0.841675	0.873449	0.576498	0.722903	0.828431	0.902051
YDR069C	DOA4	0.970541	0.980052	0.97691	0.981482	0.966616	0.975126	0.970227	0.981181	0.967087	0.98107	0.970227	0.97644
YDR070C	FMP16	0.992174	0.974427	0.996079	0.995356	0.996488	0.994515	0.971549	0.993298	0.995576	0.993236	0.973512	0.992649
YDR071C	PAA1	0.851298	0.465136	0.829603	0.521517	0.94891	0.883754	0.756038	0.831147	0.827193	0.7035	0.190451	0.733908
YDR072C	IPT1	0.851682	0.642255	0.834696	0.758005	0.815987	0.789147	0.5863	0.701579	0.82286	0.753129	0.791295	0.789615
YDR073W	SNF11	0.882875	0.84366	0.887837	0.853588	0.946918	0.943311	0.870807	0.926417	0.905435	0.91636	0.811354	0.873689
YDR074W	TPS2	0.984448	0.971688	0.987447	0.993017	0.982063	0.993031	0.973175	0.995449	0.971173	0.990376	0.941458	0.990664
YDR075W	PPH3	0.744959	0.835649	0.650146	0.809228	0.81745	0.611007	0.868796	0.819591	0.7281	0.693453	0.911107	0.719704
YDR076W	RAD55
YDR077W	SED1	0.438067	0.905576	0.81627	0.771846	0.695142	0.81627	0.905576	-0.168483	0.695142	0.750917	0.905576	0.718014
YDR078C	SHU2	-0.507366	-0.071137	0.788923	0.79892	0.907012	0.818647	0.34207	0.108336	0.914577	0.71478	0.461427	-0.374897
YDR079W	PET100	0.868005	0.782008	0.946634	0.895797	0.96615	0.946273	0.886608	0.835579	0.945882	0.863157	0.873283	0.879195
YDR080W	VPS41	0.953778	0.952917	0.908237	0.924909	0.950529	0.926172	0.945827	0.927084	0.953877	0.92722	0.952651	0.920827
YDR081C	PDC2	0.788817	0.605396	0.781034	0.688673	0.759503	0.723959	0.626117	0.702531	0.766563	0.673223	0.714262	0.75383
YDR082W	STN1	0.970817	0.927512	0.951907	0.954321	0.97474	0.956549	0.943945	0.949422	0.971142	0.952264	0.934633	0.947465
YDR083W	RRP8	0.97612	0.974233	0.987616	0.984202	0.981045	0.986059	0.975956	0.987612	0.978121	0.983989	0.975685	0.984896
YDR084C	TVP23	0.704203	0.87289	0.923311	0.945178	0.706104	0.920285	0.89877	0.963704	0.736536	0.940333	0.909521	0.912095
YDR085C	AFR1	0.947505	0.57657	0.961932	0.960322	0.974089	0.951347	0.636098	0.955834	0.970643	0.952862	0.692126	0.943229
YDR086C	SSS1	0.971288	0.961562	0.981177	0.988938	0.976599	0.981177	0.953997	0.963098	0.976599	0.988938	0.953997	0.966288
YDR087C	RRP1	0.994751	0.994776	0.98969	0.990008	0.989424	0.991781	0.994776	0.996562	0.995321	0.996562	0.993692	0.993507
YDR088C	SLU7	0.642593	0.415881	0.468803	0.104114	0.656764	0.612477	0.379442	0.253033	0.692997	0.50289	0.512728	0.559485
YDR089W	VTC5	0.962853	0.970511	0.963731	0.976937	0.974211	0.968311	0.981302	0.981221	0.978734	0.981869	0.960197	0.956619
YDR090C	ILT1	0.977737	0.980701	0.974162	0.972856	0.979761	0.974162	0.984891	0.973158	0.979761	0.972856	0.980701	0.972734
YDR091C	RLI1	0.985775	0.981067	0.990395	0.990636	0.980813	0.987779	0.973026	0.988857	0.980813	0.98701	0.960796	0.984014
YDR092W	UBC13
YDR093W	DNF2	0.915626	0.647221	0.908971	0.928695	0.955981	0.91122	0.610428	0.92076	0.953358	0.94071	0.753293	0.933138
YDR094W	YDR094W
YDR095C	YDR095C
YDR096W	GIS1	0.978955	0.899853	0.963247	0.957463	0.984001	0.977821	0.840822	0.962289	0.969379	0.966662	0.830383	0.972819
YDR097C	MSH6	-0.245687	-0.407574	0.114926	0.147894	0.893669	0.848186	0.697653	0.733418	0.142186	-0.299896	0.259588	0.0220881
YDR098C	GRX3	0.614711	0.364505	0.820093	0.744107	0.86464	0.842895	0.588205	0.777072	0.753254	0.684234	0.704907	0.414439
YDR099W	BMH2	0.919042	0.919517	0.913486	0.942534	0.860311	0.965865	0.955762	0.973535	0.897209	0.937503	0.911715	0.930285
YDR100W	TVP15	0.949478	0.91303	0.979993	0.96895	0.981939	0.986438	0.952783	0.970674	0.975849	0.963811	0.93301	0.968366
YDR101C	ARX1	0.98965	0.99181	0.995099	0.994035	0.993811	0.993449	0.994609	0.996079	0.994058	0.994627	0.993296	0.99466
YDR102C	YDR102C
YDR103W	STE5	0.954773	0.964229	0.884416	0.973564	0.935573	0.882866	0.966349	0.978488	0.956546	0.960606	0.958718	0.862813
YDR104C	SPO71	0.980437	0.96194	0.968204	0.969029	0.975777	0.970168	0.967392	0.975725	0.979195	0.973499	0.965914	0.972961
YDR105C	TMS1	0.896626	0.926578	0.933794	0.968444	0.868403	0.884405	0.968301	0.966453	0.866938	0.947548	0.958068	0.921942
YDR106W	ARP10	0.82352	0.962875	0.854111	0.978068	0.820904	0.845428	0.977118	0.982406	0.80734	0.966431	0.967975	0.858834
YDR107C	TMN2	0.915247	0.803083	0.966888	0.948551	0.91607	0.963737	0.884092	0.948522	0.922095	0.947624	0.863029	0.946696
YDR108W	TRS85	0.91919	0.765638	0.885328	0.889036	0.939009	0.890204	0.730643	0.881827	0.921384	0.908782	0.801202	0.864276
YDR109C	YDR109C	0.79653	0.624293	0.484598	0.0760508	0.893108	0.853318	0.81756	0.608834	0.660208	0.277634	0.349182	0.222056
YDR110W	FOB1	0.649901	0.847128	0.891236	0.971359	0.726725	0.857262	0.918529	0.968277	0.703786	0.924682	0.932105	0.903585
YDR111C	ALT2
YDR112W	IRC2
YDR113C	PDS1	0.851366	0.876518	0.930831	0.945477	0.806557	0.856269	0.94919	0.91941	0.883158	0.892632	0.929019	0.914268
YDR114C	YDR114C
YDR115W	MRX14	0.717587	0.648494	0.811898	0.900961	0.884248	0.757341	0.956451	0.804954	0.740416	0.120058	0.917088	0.628891
YDR116C	MRPL1	0.632814	0.86233	0.725487	0.706939	0.6174	0.724868	0.909531	0.764018	0.531218	0.656754	0.838931	0.725487
YDR117C	TMA64	0.620311	0.706381	0.716549	0.531336	0.644351	0.716433	0.624805	0.71602	0.782205	0.764839	0.433474	0.457229
YDR118W	APC4	0.910636	0.888221	0.970943	0.889802	0.942534	0.969359	0.91318	0.89339	0.941946	0.905392	0.878992	0.932734
YDR119W	VBA4	0.922891	0.814005	0.923607	0.962206	0.907121	0.883258	0.948761	0.965391	0.886976	0.922891	0.934676	0.919599
YDR120C	TRM1	0.978962	0.951847	0.98497	0.977941	0.980108	0.986022	0.96544	0.98326	0.976707	0.979643	0.947576	0.98475
YDR121W	DPB4	0.951993	0.389435	0.641085	0.560306	0.955362	0.956073	0.685069	0.768606	0.838371	0.313148	0.401955	0.901818
YDR122W	KIN1	0.979506	0.985441	0.989298	0.993849	0.978776	0.985891	0.986636	0.991294	0.957634	0.985379	0.973287	0.985632
YDR123C	INO2
YDR124W	YDR124W
YDR125C	ECM18
YDR126W	SWF1	0.824117	0.816533	0.639582	0.863923	0.821782	0.593522	0.851346	0.884512	0.858983	0.821239	0.795173	0.634023
YDR127W	ARO1	0.975493	0.831425	0.948278	0.852345	0.946043	0.868944	0.758968	0.829316	0.816963	0.769119	0.791367	0.868944
YDR128W	MTC5	0.870685	0.951687	0.848554	0.910572	0.863526	0.861928	0.950687	0.91208	0.861983	0.903906	0.875253	0.856616
YDR129C	SAC6	0.961115	0.957338	0.978489	0.9856	0.966268	0.98548	0.965438	0.974671	0.955743	0.97736	0.9631	0.963754
YDR130C	FIN1	0.960213	0.92613	0.952849	0.928263	0.947878	0.954944	0.930771	0.925568	0.940213	0.930477	0.912327	0.953179
YDR131C	YDR131C	0.957134	0.972049	0.979963	0.981305	0.96148	0.976473	0.972628	0.977207	0.96148	0.978809	0.957633	0.970124
YDR132C	MRX16	0.911672	0.844492	0.796197	0.925252	0.899598	0.797898	0.891725	0.95757	0.924142	0.945449	0.884923	0.839167
YDR133C	YDR133C
YDR134C	CCW22
YDR135C	YCF1	0.880523	0.75925	0.582862	0.59873	0.895073	0.835432	0.957237	0.745067	0.880654	0.723035	0.9094	0.818292
YDR136C	VPS61
YDR137W	RGP1	0.93326	0.931102	0.901286	0.93137	0.940553	0.9206	0.930023	0.91973	0.893375	0.90042	0.939173	0.916972
YDR138W	HPR1
YDR139C	RUB1
YDR140W	MTQ2	0.648844	0.57325	0.528416	0.5541	0.810374	0.551963	0.742646	0.530055	0.74331	0.672693	0.658863	0.546611
YDR141C	DOP1	0.896742	0.903866	0.904212	0.854763	0.877303	0.915399	0.889737	0.843947	0.864368	0.814366	0.907356	0.90987
YDR142C	PEX7	0.945627	0.923237	0.877419	0.912892	0.937433	0.917851	0.960302	0.941921	0.936615	0.930848	0.931534	0.911336
YDR143C	SAN1	0.905722	0.906247	0.906835	0.947871	0.862572	0.893571	0.934936	0.956293	0.888152	0.947305	0.93078	0.903681
YDR144C	MKC7	0.981752	0.946824	0.984568	0.969202	0.988958	0.990976	0.948581	0.984336	0.993003	0.975691	0.945606	0.980567
YDR145W	TAF12
YDR146C	SWI5	0.571143	0.929987	0.899851	0.90803	0.723571	0.906657	0.934927	0.886342	0.772729	0.856217	0.935916	0.906275
YDR147W	EKI1	0.845042	0.928828	0.933872	0.96584	0.849206	0.919056	0.961966	0.958557	0.87204	0.95774	0.953995	0.877992
YDR148C	KGD2	0.971718	0.896311	0.980728	0.969577	0.978208	0.977326	0.937544	0.974152	0.968352	0.946359	0.944632	0.975913
YDR149C	YDR149C
YDR150W	NUM1	0.923207	0.911176	0.936738	0.756868	0.94363	0.950583	0.865586	0.75495	0.922638	0.795829	0.883522	0.944394
YDR151C	CTH1	0.311051	0.283318	0.56662	0.226011	0.55325	0.794135	0.619901	0.719664	-0.118391	-0.232791	-0.217562	0.112832
YDR152W	GIR2	0.960952	0.952256	0.963993	0.888671	0.970251	0.987124	0.94004	0.880426	0.968071	0.925776	0.959899	0.986854
YDR153C	ENT5	0.702705	0.797088	0.350231	0.593545	0.703867	0.656947	0.798182	0.647189	0.630457	0.611856	0.790938	0.627549
YDR154C	YDR154C
YDR155C	CPR1	0.940641	0.979118	0.972364	0.958572	0.940641	0.972364	0.979118	0.958572	0.940641	0.958572	0.979118	0.972364
YDR156W	RPA14	0.973947	0.987481	0.987889	0.983534	0.97075	0.987937	0.991286	0.986622	0.975437	0.987597	0.990883	0.989051
YDR157W	YDR157W
YDR158W	HOM2	0.875832	0.876967	0.884614	0.852345	0.816963	0.888091	0.916014	0.91503	0.768731	0.834664	0.793288	0.884614
YDR159W	SAC3	0.530281	0.593008	0.537294	0.685269	0.777357	0.698861	0.71395	0.617097	0.633863	0.626128	0.694593	0.514425
YDR160W	SSY1	0.925343	0.95927	0.920834	0.952088	0.933807	0.938174	0.973438	0.956741	0.925343	0.934886	0.971964	0.944611
YDR161W	ACL4	0.989787	0.980455	0.992754	0.993073	0.99001	0.993198	0.985776	0.994575	0.991335	0.995635	0.986205	0.995418
YDR162C	NBP2	0.600283	0.577692	0.825992	0.612042	0.88226	0.874519	0.58208	0.588212	0.75743	0.568534	0.521818	0.768103
YDR163W	CWC15	0.47882	0.796535	0.881185	0.82189	0.453801	0.761586	0.856337	0.81321	0.589186	0.804407	0.814815	0.866079
YDR164C	SEC1	0.354636	0.637139	0.258174	0.454975	0.707703	0.628266	0.923596	0.920984	0.478543	0.667778	0.657678	0.179979
YDR165W	TRM82	0.982384	0.966414	0.991158	0.987593	0.993735	0.995183	0.982634	0.993013	0.987947	0.988489	0.973868	0.991158
YDR166C	SEC5	0.870608	0.848416	0.824907	0.807659	0.892907	0.866182	0.904121	0.803833	0.895051	0.83584	0.886105	0.88098
YDR167W	TAF10	0.333768	0.341066	0.811205	0.849403	0.474795	0.768756	0.824741	0.859883	0.34284	0.82043	0.763253	0.417895
YDR168W	CDC37	0.536435	0.759664	0.64531	0.898094	0.798557	0.799422	0.932898	0.929336	0.583648	0.942626	0.762583	0.723837
YDR169C	STB3	0.9461	0.927296	0.95564	0.958004	0.920061	0.959209	0.905429	0.959211	0.937073	0.957187	0.888544	0.958076
YDR170C	SEC7	0.76763	0.805471	0.736562	0.606304	0.935138	0.822356	0.895866	0.730366	0.709016	0.242845	0.828955	0.485629
YDR171W	HSP42	0.990334	0.905676	0.991555	0.993972	0.987593	0.990573	0.927818	0.992447	0.985911	0.993067	0.929615	0.98971
YDR172W	SUP35	0.989245	0.977734	0.995563	0.994014	0.992841	0.995563	0.97206	0.992335	0.992841	0.994014	0.976566	0.992157
YDR173C	ARG82	0.750003	0.666774	0.829485	0.567666	0.851525	0.882621	0.788878	0.532213	0.740141	0.650465	0.700633	0.844919
YDR174W	HMO1	0.71817	0.891334	0.861518	0.86054	0.843632	0.861518	0.901797	0.814864	0.843632	0.86054	0.891334	0.745424
YDR175C	RSM24	0.617654	0.718459	0.693886	0.657148	0.631455	0.726264	0.747983	0.658587	0.621526	0.395593	0.780262	0.757123
YDR176W	NGG1	0.758045	0.930141	0.873398	0.908157	0.805488	0.878712	0.929706	0.91609	0.645268	0.881832	0.931343	0.85143
YDR177W	UBC1	0.362568	0.858043	0.801708	0.803649	0.244617	0.701951	0.898377	0.739775	0.397099	0.82043	0.787625	0.790128
YDR178W	SDH4	0.980907	0.932869	0.989325	0.98748	0.969452	0.981503	0.979671	0.988454	0.968147	0.976525	0.962812	0.989325
YDR179C	CSN9	0.72709	0.941069	0.933884	0.955398	0.761394	0.877249	0.963911	0.949542	0.707201	0.903068	0.956764	0.939524
YDR180W	SCC2	0.839798	0.594686	0.768117	0.581876	0.879061	0.780743	0.696664	0.594264	0.863994	0.560842	0.788775	0.74899
YDR181C	SAS4	0.933945	0.947391	0.932061	0.935381	0.950584	0.937258	0.929714	0.935381	0.943495	0.930937	0.950001	0.939345
YDR182W	CDC1	0.496081	0.855708	0.926363	0.92817	0.71366	0.77086	0.966462	0.948088	0.584244	0.853286	0.949752	0.920075
YDR183W	PLP1	0.799758	0.654852	0.701432	0.830151	0.887772	0.733996	0.739085	0.821563	0.810376	0.860538	0.666099	0.694336
YDR184C	ATC1	0.984009	0.979645	0.990829	0.989727	0.978653	0.989526	0.981463	0.990824	0.984009	0.986656	0.979533	0.991764
YDR185C	UPS3
YDR186C	SND1	0.913258	0.952405	0.900055	0.923201	0.953196	0.904154	0.950946	0.901435	0.888292	0.905768	0.947739	0.881918
YDR187C	YDR187C
YDR188W	CCT6	0.947431	0.944916	0.969104	0.983032	0.97646	0.968121	0.953666	0.974446	0.966719	0.974078	0.956153	0.945394
YDR189W	SLY1	0.812964	0.856869	0.805054	0.798257	0.834812	0.777511	0.872581	0.771945	0.756285	0.814065	0.843824	0.781133
YDR190C	RVB1	0.966699	0.931557	0.974799	0.977802	0.971089	0.971696	0.917546	0.968605	0.97345	0.973852	0.91634	0.972747
YDR191W	HST4	0.866175	0.874418	0.937783	0.961901	0.922793	0.932968	0.858593	0.947874	0.89899	0.946278	0.895419	0.896912
YDR192C	NUP42	0.606413	0.742336	0.790022	0.875724	0.73603	0.731165	0.848457	0.88848	0.700177	0.89686	0.712138	0.763809
YDR193W	YDR193W
YDR194C	MSS116	0.952488	0.921637	0.976388	0.966442	0.962179	0.977292	0.948156	0.966442	0.952847	0.952168	0.948156	0.976388
YDR195W	REF2	0.83881	0.848983	0.629869	0.855638	0.85815	0.626423	0.873771	0.857049	0.88576	0.858219	0.844421	0.659892
YDR196C	CAB5	0.941834	0.938213	0.965252	0.963858	0.975176	0.971038	0.94778	0.96648	0.973235	0.970933	0.913359	0.965656
YDR197W	CBS2	0.876187	0.41637	0.893998	0.940951	0.930782	0.856691	0.475064	0.70308	0.935187	0.927293	0.378304	0.810446
YDR198C	RKM2	0.458432	0.906895	0.0055485	0.56407	0.668497	0.456315	0.912401	0.918176	0.437925	0.824906	0.761542	-0.0237025
YDR199W	YDR199W
YDR200C	VPS64	0.868169	0.910148	0.888246	0.931077	0.835647	0.880556	0.925005	0.942841	0.846958	0.938069	0.915074	0.890657
YDR201W	SPC19	0.836769	0.90611	0.87495	0.823235	0.758889	0.862729	0.879163	0.862238	0.711751	0.862238	0.862551	0.862729
YDR202C	RAV2	0.967795	0.964989	0.975638	0.983073	0.971107	0.973737	0.969228	0.983073	0.968464	0.973018	0.984221	0.979652
YDR203W	YDR203W
YDR204W	COQ4	0.991186	0.985054	0.9908	0.994985	0.990345	0.990601	0.985054	0.994985	0.991186	0.992413	0.980607	0.9908
YDR205W	MSC2	0.70141	0.737623	0.731975	0.760062	0.675345	0.749232	0.70092	0.823369	0.686894	0.79839	0.723498	0.703015
YDR206W	EBS1	0.476062	0.700192	0.4854	0.691022	0.762571	0.299919	0.835277	0.833634	0.286337	0.194883	0.730092	0.455686
YDR207C	UME6	0.745111	0.804388	0.795939	0.708133	0.793566	0.767122	0.801746	0.552053	0.782136	0.58881	0.858254	0.664955
YDR208W	MSS4	0.863949	0.939118	0.875394	0.75495	0.902642	0.891068	0.940957	0.774257	0.900188	0.795129	0.940152	0.872993
YDR209C	YDR209C
YDR210W	YDR210W
YDR211W	GCD6	0.833592	0.682642	0.921046	0.91321	0.961264	0.964932	0.702722	0.92528	0.957071	0.904617	0.6945	0.888716
YDR212W	TCP1	0.970829	0.968092	0.967161	0.967617	0.96876	0.971412	0.980436	0.985716	0.971565	0.980602	0.969138	0.967908
YDR213W	UPC2	0.64456	0.502628	0.388721	0.673106	0.728274	0.197238	0.672678	0.743492	0.737975	0.703719	0.752012	0.169686
YDR214W	AHA1	0.936758	0.987211	0.894172	0.971602	0.936758	0.930692	0.970151	0.970056	0.840519	0.963782	0.986196	0.930692
YDR215C	YDR215C
YDR216W	ADR1	0.918521	0.952756	0.956159	0.972201	0.938228	0.967686	0.946925	0.968288	0.933434	0.972201	0.952756	0.925138
YDR217C	RAD9	0.643985	0.664609	0.748684	0.418723	0.854167	0.814509	0.70089	0.552977	0.651608	0.520809	0.573676	0.744598
YDR218C	SPR28
YDR219C	MFB1	0.959184	0.962348	0.971013	0.97584	0.961264	0.970454	0.971248	0.972623	0.961264	0.963915	0.973985	0.968666
YDR220C	YDR220C
YDR221W	GTB1	0.940107	0.947216	0.945741	0.966188	0.941558	0.965312	0.946174	0.980131	0.918635	0.97719	0.918299	0.947905
YDR222W	YDR222W	0.90827	0.939275	0.915366	0.949628	0.920294	0.920788	0.917657	0.949158	0.894833	0.951748	0.925197	0.928232
YDR223W	CRF1	0.955377	0.912535	0.968962	0.977447	0.97225	0.970543	0.929893	0.975968	0.969659	0.987378	0.947824	0.968495
YDR224C	HTB1	0.931906	0.87084	0.860792	0.760603	0.884276	0.852067	0.936759	0.972876	0.908374	0.874309	0.809923	0.860792
YDR225W	HTA1	0.656846	0.826981	0.869895	0.867092	0.913045	0.885853	0.838022	0.682762	0.780221	0.742397	0.826981	0.681411
YDR226W	ADK1	0.970563	0.904789	0.974974	0.983005	0.969888	0.980088	0.94931	0.983515	0.96593	0.982605	0.907549	0.969511
YDR227W	SIR4	0.873607	0.92353	0.89026	0.792326	0.825971	0.856677	0.92353	0.844908	0.873607	0.844908	0.902901	0.819914
YDR228C	PCF11	0.703921	0.74997	0.472811	0.537542	0.818507	0.449745	0.846987	0.783172	0.853898	0.771309	0.700249	0.571022
YDR229W	IVY1	0.923712	0.928493	0.955242	0.958443	0.924566	0.95542	0.954741	0.962894	0.893565	0.954234	0.927204	0.960407
YDR230W	YDR230W
YDR231C	COX20	0.978463	0.918655	0.988194	0.981324	0.984879	0.989977	0.938201	0.979577	0.984673	0.977235	0.925708	0.986951
YDR232W	HEM1	0.805679	0.928572	0.824869	0.92387	0.771897	0.811058	0.928572	0.952831	0.805679	0.952831	0.837065	0.811058
YDR233C	RTN1	0.957268	0.917831	0.968731	0.979175	0.961297	0.99081	0.934242	0.981719	0.970176	0.976762	0.887711	0.98163
YDR234W	LYS4	0.871136	0.98552	0.816989	0.953359	0.871136	0.828166	0.984757	0.953359	0.829084	0.953359	0.98552	0.816989
YDR235W	PRP42	0.941642	0.953681	0.920136	0.922665	0.943982	0.941831	0.941961	0.90893	0.923879	0.914859	0.953681	0.929353
YDR236C	FMN1	0.948956	0.92583	0.92631	0.896694	0.946461	0.948801	0.901423	0.89408	0.974563	0.923906	0.9029	0.955734
YDR237W	MRPL7	0.814188	0.855836	0.716039	0.901623	0.760178	0.734474	0.84985	0.901623	0.763583	0.919031	0.927913	0.800884
YDR239C	YDR239C
YDR240C	SNU56	0.589258	0.762573	0.573045	0.492578	0.707371	0.613426	0.830817	0.48033	0.468221	0.241043	0.769727	0.436195
YDR241W	BUD26
YDR246W	TRS23	0.747586	0.119733	0.613262	0.737425	0.797687	0.71724	0.687313	0.681968	0.768657	0.652958	0.510272	0.675448
YDR247W	VHS1	0.903341	0.934954	0.958468	0.964468	0.903074	0.952507	0.958679	0.96181	0.918332	0.964427	0.957463	0.960438
YDR248C	YDR248C	0.960381	0.902059	0.984689	0.99127	0.984386	0.986448	0.986767	0.99127	0.960381	0.980445	0.986767	0.984689
YDR249C	YDR249C	0.47654	0.587248	0.78211	0.503601	0.840146	0.826698	0.507321	0.450447	0.769914	0.652486	-0.0627001	0.293169
YDR250C	YDR250C
YDR251W	PAM1	0.934702	0.911741	0.964195	0.966006	0.94422	0.964029	0.934919	0.963369	0.939917	0.959923	0.954991	0.967026
YDR252W	BTT1	0.975243	0.955455	0.979542	0.983079	0.981727	0.976239	0.969952	0.975392	0.981784	0.978242	0.975521	0.98231
YDR253C	MET32	0.992653	0.995435	0.994687	0.995363	0.992415	0.994109	0.995435	0.995363	0.992653	0.995925	0.995435	0.994687
YDR254W	CHL4	0.977448	0.966563	0.978436	0.971042	0.985426	0.98139	0.971031	0.973963	0.981784	0.970856	0.962594	0.979019
YDR255C	RMD5	0.981407	0.963302	0.968962	0.981129	0.983514	0.973167	0.968545	0.986626	0.982231	0.98215	0.938729	0.971465
YDR256C	CTA1	0.913639	0.927216	0.971895	0.972123	0.943117	0.975319	0.937571	0.966878	0.94206	0.972123	0.950821	0.977632
YDR257C	RKM4	0.587381	0.743781	0.732673	0.855012	0.837323	0.714654	0.76894	0.795689	0.829077	0.779258	0.756373	0.642344
YDR258C	HSP78	0.953951	0.904885	0.974016	0.948602	0.970313	0.959793	0.916924	0.948602	0.962445	0.94203	0.916924	0.974016
YDR259C	YAP6	0.965157	0.963973	0.962181	0.974289	0.969408	0.96719	0.969011	0.976898	0.957639	0.973801	0.946503	0.961422
YDR260C	SWM1
YDR261C	EXG2	-0.0700617	0.851498	0.14565	0.877655	0.720199	0.806295	0.971549	0.946264	-0.0874208	0.735811	0.864227	0.231539
YDR262W	YDR262W	0.977887	0.962549	0.985273	0.970327	0.979342	0.978272	0.975434	0.96925	0.973352	0.957027	0.976189	0.987513
YDR263C	DIN7	0.407698	0.666358	0.894454	0.956274	0.787991	0.852959	0.917192	0.971616	0.405008	0.805635	0.872673	0.912104
YDR264C	AKR1	0.829103	0.758017	0.805383	0.715266	0.832992	0.822997	0.614858	0.666559	0.832205	0.663163	0.66495	0.862891
YDR265W	PEX10	0.96527	0.853781	0.977917	0.955236	0.977631	0.976698	0.863986	0.948682	0.968773	0.940218	0.869051	0.973076
YDR266C	HEL2	0.934883	0.797015	0.942798	0.837636	0.932453	0.948252	0.882166	0.877555	0.932817	0.845278	0.827725	0.95229
YDR267C	CIA1	0.699211	-0.0376318	0.512358	0.635247	0.856611	0.787575	0.817781	0.834453	0.190623	-0.148086	0.615866	0.600733
YDR268W	MSW1	0.82086	0.568867	0.90349	0.893572	0.850413	0.902512	0.557319	0.892195	0.774478	0.874767	0.443429	0.880632
YDR269C	YDR269C
YDR270W	CCC2	0.469368	0.893239	0.941693	0.902396	0.328969	0.755209	0.949245	0.900775	0.55999	0.853964	0.955338	0.950083
YDR271C	YDR271C
YDR272W	GLO2	0.969613	0.941367	0.98141	0.986805	0.967925	0.974489	0.949613	0.984987	0.982797	0.987162	0.925877	0.95477
YDR273W	DON1	0.968131	0.948857	0.941522	0.925858	0.952919	0.927545	0.959513	0.938822	0.964239	0.931293	0.947383	0.94413
YDR274C	YDR274C
YDR275W	BSC2	0.957124	0.803376	0.975453	0.920454	0.972708	0.969636	0.768109	0.928831	0.974097	0.937802	0.548848	0.970647
YDR276C	PMP3	0.849881	0.897877	0.942221	0.949107	0.924573	0.946794	0.88083	0.956651	0.900878	0.962914	0.887324	0.931216
YDR277C	MTH1	0.962746	0.69398	0.902464	0.808868	0.973664	0.917999	0.824016	0.801363	0.956288	0.764925	0.707883	0.889261
YDR278C	YDR278C
YDR279W	RNH202
YDR280W	RRP45	0.840633	0.880599	0.799011	0.899278	0.950585	0.873123	0.962029	0.958346	0.844926	0.903165	0.857198	0.779239
YDR281C	PHM6	0.760274	0.96661	0.949741	0.945103	0.760274	0.949741	0.96661	0.945103	0.760274	0.91341	0.96661	0.949741
YDR282C	MRX10	0.938627	0.896414	0.958874	0.949927	0.947702	0.966849	0.910805	0.952084	0.930752	0.949409	0.913678	0.96681
YDR283C	GCN2	0.940742	0.943983	0.949844	0.936374	0.973533	0.978124	0.970866	0.964333	0.95318	0.943429	0.94411	0.947244
YDR284C	DPP1	0.981904	0.981339	0.983687	0.977764	0.978216	0.986886	0.971468	0.973398	0.979715	0.975332	0.974279	0.987326
YDR285W	ZIP1	0.810128	0.956876	0.937994	0.971482	0.817597	0.901994	0.970792	0.97648	0.810128	0.952718	0.955044	0.932651
YDR286C	MGP12	0.606969	0.691825	0.925087	0.842024	0.955848	0.93487	0.539396	0.684964	0.948293	0.860348	0.55034	0.677289
YDR287W	INM2	0.982793	0.948815	0.984271	0.982919	0.98785	0.989077	0.94372	0.983631	0.986278	0.983599	0.948815	0.986158
YDR288W	NSE3	0.969697	0.922245	0.936375	0.950423	0.972392	0.935617	0.908192	0.908555	0.950687	0.923232	0.899897	0.920054
YDR289C	RTT103
YDR290W	YDR290W
YDR291W	HRQ1	0.812802	0.87901	0.709837	0.939887	0.862659	0.776999	0.931199	0.947162	0.819156	0.929348	0.845129	0.769379
YDR292C	SRP101	0.878554	0.689967	0.892152	0.89799	0.924523	0.846731	0.742393	0.876365	0.924523	0.887825	0.757883	0.855426
YDR293C	SSD1	0.891202	0.846296	0.923848	0.937708	0.935328	0.934598	0.866312	0.957857	0.873676	0.925257	0.9087	0.936972
YDR294C	DPL1	0.631071	0.325005	0.883631	0.842828	0.868114	0.899566	0.318589	0.710929	0.862256	0.85325	0.396074	0.873085
YDR295C	HDA2	0.708226	0.826825	0.700697	0.73676	0.852358	0.760158	0.833151	0.763959	0.623587	0.698306	0.723409	0.593956
YDR296W	MHR1	0.404497	0.814191	0.732806	0.751117	0.855695	0.75296	0.93211	0.8038	0.884863	0.831502	0.89148	0.662291
YDR297W	SUR2	0.819779	0.770132	0.834204	0.821538	0.83988	0.845419	0.441666	0.796276	0.877785	0.875922	0.773867	0.776993
YDR298C	ATP5	0.935052	0.918977	0.975728	0.938928	0.985372	0.970285	0.939505	0.936819	0.944003	0.909459	0.939505	0.970677
YDR299W	BFR2	0.982667	0.980755	0.990734	0.988839	0.979411	0.991994	0.985599	0.990956	0.981676	0.990452	0.985417	0.992283
YDR300C	PRO1	0.982489	0.948444	0.978399	0.974294	0.984466	0.982062	0.931754	0.969313	0.975242	0.97551	0.939319	0.981711
YDR301W	CFT1	0.842793	0.753964	0.6791	0.653791	0.875167	0.762318	0.790413	0.601412	0.747446	0.653386	0.781685	0.770121
YDR302W	GPI11	0.633183	0.410079	0.204384	0.493785	0.611082	0.629601	0.774982	0.818235	-0.174934	0.226797	0.771564	0.635284
YDR303C	RSC3	0.574511	0.763865	0.801456	0.688658	0.691422	0.557863	0.806362	0.701183	0.55279	0.629653	0.819334	0.781849
YDR304C	CPR5	0.54297	0.786404	0.881615	0.803697	0.733205	0.892848	0.786404	0.855137	0.809943	0.928045	0.855986	0.900939
YDR305C	HNT2	0.952403	0.910949	0.925096	0.939976	0.904987	0.93599	0.906998	0.9487	0.935729	0.944211	0.885083	0.93599
YDR306C	PFU1	0.971641	0.943322	0.978361	0.971715	0.970032	0.975185	0.967327	0.97018	0.9755	0.96294	0.938892	0.975987
YDR307W	PMT7	0.726149	0.728559	0.857418	0.584779	0.81219	0.958265	0.770896	0.701912	0.832665	0.594091	0.720663	0.911258
YDR308C	SRB7	0.817537	0.884115	0.793277	0.698917	0.86206	0.7979	0.895417	0.783927	0.818461	0.663219	0.811893	0.793277
YDR309C	GIC2	0.0555034	0.76993	0.666908	0.622249	0.730354	0.702712	0.7965	0.51792	0.767056	0.613665	0.81229	0.363435
YDR310C	SUM1	0.630752	0.526767	0.774232	0.76436	0.676095	0.704455	0.814912	0.72478	0.678734	0.69297	0.594073	0.755615
YDR311W	TFB1	0.765307	0.414757	0.837514	0.622218	0.938281	0.879921	0.586847	0.64013	0.926934	0.652823	0.496227	0.681234
YDR312W	SSF2	0.98279	0.985047	0.975646	0.974858	0.975593	0.977723	0.981368	0.980944	0.975656	0.980944	0.972944	0.979275
YDR313C	PIB1	0.972731	0.947031	0.980198	0.963897	0.983554	0.980198	0.940036	0.959876	0.983554	0.963897	0.9485	0.973134
YDR314C	RAD34	0.89923	0.92476	0.950927	0.973264	0.921991	0.944021	0.96818	0.969405	0.91033	0.946878	0.969661	0.947121
YDR315C	IPK1	0.965564	0.713353	0.976828	0.945584	0.979071	0.979955	0.678351	0.933979	0.973762	0.947159	0.656333	0.974102
YDR316W	OMS1	0.836097	-0.29763	0.588454	0.625682	0.696879	0.24962	0.849668	0.625739	0.653867	0.116577	0.83642	0.643185
YDR317W	HIM1
YDR318W	MCM21	0.872662	0.730834	0.874444	0.357313	0.959108	0.938263	0.772659	0.570477	0.852958	0.352175	0.637487	0.908942
YDR319C	YFT2	0.973896	0.881464	0.973209	0.884246	0.984884	0.985486	0.899097	0.890135	0.964927	0.889876	0.828598	0.948477
YDR320C	SWA2	0.805421	0.635455	0.74265	0.641619	0.892159	0.827502	0.624653	0.618803	0.855669	0.627918	0.573731	0.809546
YDR321W	ASP1	0.997092	0.99296	0.993633	0.994166	0.995429	0.993889	0.990133	0.99345	0.993277	0.992974	0.988722	0.992053
YDR322W	MRPL35	0.691516	0.734646	0.512963	0.32749	0.816305	0.625493	0.822611	0.663441	0.525373	0.605662	0.892738	0.78215
YDR323C	PEP7	0.39223	-0.487391	0.9545	0.48228	0.939336	0.958696	0.219319	0.397429	0.936832	0.415032	-0.371142	0.261298
YDR324C	UTP4	0.991764	0.98848	0.994227	0.995917	0.992132	0.99357	0.989752	0.994797	0.993412	0.996801	0.987369	0.99384
YDR325W	YCG1	0.68713	0.723365	0.865381	0.349415	0.871086	0.905813	0.751358	0.658102	0.761571	0.503389	0.637526	0.620023
YDR326C	YSP2	0.7688	0.720877	0.616779	0.65685	0.8629	0.767122	0.725182	0.710838	0.758032	0.669588	0.720877	0.588796
YDR327W	YDR327W
YDR328C	SKP1	0.647626	0.613084	0.939021	0.926118	0.909124	0.919318	0.578406	0.792693	0.948573	0.951783	0.731097	0.942814
YDR329C	PEX3	0.960054	0.907244	0.972549	0.972734	0.975043	0.973943	0.942321	0.969043	0.971681	0.958398	0.943052	0.972356
YDR330W	UBX5	0.97732	0.906636	0.979574	0.985374	0.981758	0.974599	0.925228	0.979652	0.950173	0.981749	0.923825	0.974268
YDR331W	GPI8	0.556615	0.314533	0.699131	0.188916	0.914524	0.774337	0.848672	0.691548	0.832289	0.359844	-0.00202944	-0.182774
YDR332W	IRC3	0.935638	0.867292	0.819707	0.875052	0.941812	0.854085	0.854011	0.900212	0.905182	0.903094	0.846116	0.82887
YDR333C	RQC1	0.624306	0.514973	0.638336	0.412357	0.734116	0.61055	0.618781	0.808373	0.441791	0.761791	0.390402	0.493273
YDR334W	SWR1	0.643499	0.351235	0.564685	0.665882	0.74857	0.382832	0.791643	0.842096	0.675543	0.349037	0.58958	0.496788
YDR335W	MSN5	0.916139	0.933807	0.947337	0.909289	0.879323	0.87016	0.911863	0.954636	0.929562	0.915549	0.891791	0.919704
YDR336W	MRX8	0.900783	0.913288	0.920742	0.930215	0.935095	0.941477	0.933775	0.953238	0.871472	0.923379	0.904202	0.93068
YDR337W	MRPS28	0.612547	0.490023	0.611286	0.0169542	0.353388	0.348799	0.79662	0.837075	0.612547	0.730657	0.483677	0.611286
YDR338C	YDR338C	0.932832	0.922169	0.88165	0.93844	0.936679	0.883017	0.9337	0.929626	0.92977	0.943882	0.921559	0.88446
YDR339C	FCF1	0.972215	0.985782	0.98646	0.992315	0.965102	0.97833	0.980339	0.988114	0.965102	0.987588	0.977144	0.978658
YDR340W	YDR340W
YDR341C	YDR341C	0.977439	0.964555	0.987378	0.991606	0.98898	0.98684	0.970807	0.986306	0.990729	0.988657	0.973569	0.980484
YDR342C	HXT7
YDR343C	HXT6
YDR344C	YDR344C
YDR345C	HXT3	0.905199	0.817898	0.902006	0.971548	0.955529	0.930013	0.920399	0.981266	0.926734	0.971548	0.860543	0.897708
YDR346C	SVF1	0.951758	0.893173	0.970963	0.981721	0.963708	0.945648	0.908578	0.96219	0.965129	0.975943	0.910761	0.953457
YDR347W	MRP1	0.71059	0.803468	0.791288	0.468283	0.666408	0.783572	0.808574	0.618635	0.69698	0.486949	0.8263	0.836159
YDR348C	PAL1	0.727117	0.859769	0.615592	0.807591	0.819941	0.698449	0.897029	0.826549	0.674786	0.738338	0.921555	0.425393
YDR349C	YPS7	0.605666	0.839288	0.702742	0.666209	0.512296	0.78787	0.379739	0.0106066	0.701634	0.374704	0.573903	0.0426853
YDR350C	ATP22	0.972079	0.908921	0.968841	0.967783	0.974049	0.97301	0.927869	0.958773	0.968115	0.965999	0.916571	0.970665
YDR351W	SBE2	0.851654	0.713091	0.804008	0.690391	0.872791	0.795917	0.60978	0.640629	0.850139	0.559539	0.594103	0.628011
YDR352W	YPQ2	0.925452	0.953403	0.903858	0.688612	0.925452	0.923951	0.90857	0.789878	0.926542	0.773668	0.967833	0.92704
YDR353W	TRR1	0.857888	0.866289	0.928387	0.906047	0.968689	0.930918	0.856906	0.846794	0.978602	0.908168	0.899337	0.89749
YDR354W	TRP4	0.938678	0.943956	0.956604	0.962826	0.938678	0.959571	0.976053	0.97007	0.918847	0.953225	0.976703	0.974664
YDR355C	YDR355C
YDR356W	SPC110	0.886563	0.960356	0.927557	0.835018	0.902203	0.927662	0.957228	0.862068	0.881871	0.855482	0.952339	0.923975
YDR357C	CNL1	0.945188	0.784033	0.955945	0.940628	0.939441	0.951982	0.819822	0.930701	0.943602	0.916371	0.797502	0.939251
YDR358W	GGA1	0.985147	0.962388	0.988911	0.989281	0.990355	0.990024	0.962388	0.988796	0.98914	0.990964	0.946758	0.986245
YDR359C	EAF1	0.797986	0.875163	0.756401	0.831662	0.798381	0.756401	0.887853	0.831662	0.830167	0.832039	0.914633	0.765402
YDR360W	OPI7
YDR361C	BCP1	0.977438	0.98544	0.990126	0.987909	0.9735	0.988238	0.981975	0.991062	0.978657	0.990077	0.980411	0.988771
YDR362C	TFC6	0.9261	0.859876	0.850706	0.850627	0.926739	0.859766	0.87696	0.851109	0.936306	0.860893	0.875967	0.876861
YDR363W	ESC2
YDR364C	CDC40	0.539196	0.619494	0.392061	0.503423	0.594607	0.561613	0.647946	0.485866	0.611605	0.627775	0.692701	0.53134
YDR365C	ESF1	0.992096	0.988066	0.994871	0.993319	0.992756	0.993198	0.985757	0.994045	0.994349	0.995596	0.987878	0.995011
YDR366C	YDR366C
YDR367W	KEI1	0.793064	0.772039	0.337769	0.616473	0.651268	0.544653	0.859259	0.917398	0.797147	0.907655	0.770064	0.474728
YDR368W	YPR1	0.839869	0.250247	0.56471	0.474247	0.966838	0.976838	0.466193	0.423973	0.1942	0.440563	0.237384	0.725683
YDR369C	XRS2	0.965644	0.950764	0.931105	0.937304	0.962122	0.937343	0.955825	0.95268	0.951508	0.945268	0.944887	0.919448
YDR370C	DXO1
YDR371W	CTS2	0.812898	0.277809	0.649235	0.584818	0.878135	0.815992	0.673264	0.576583	0.661649	0.441365	0.313353	0.722734
YDR372C	VPS74	0.734566	0.392496	0.521525	0.778779	0.640483	0.581053	0.752333	0.709508	0.768283	0.727913	0.540205	0.430027
YDR373W	FRQ1	0.679443	0.818943	0.889807	0.785907	0.78516	0.879623	0.80122	0.83086	0.664181	0.853743	0.81513	0.811229
YDR374C	PHO92
YDR375C	BCS1	0.739829	0.481993	0.153587	0.580711	0.499938	0.118688	0.581903	0.576002	0.702107	0.624541	0.658689	0.60218
YDR376W	ARH1	0.914301	0.796569	0.867768	0.866948	0.912347	0.875172	0.86489	0.881721	0.862016	0.878375	0.836504	0.890498
YDR377W	ATP17	0.985665	0.942116	0.967975	0.957526	0.978096	0.979909	0.951381	0.960251	0.985665	0.97146	0.920604	0.975728
YDR378C	LSM6	0.790393	0.659125	0.87747	0.844326	0.914782	0.874536	0.743922	0.776447	0.776161	0.768593	0.743922	0.751068
YDR379W	RGA2	0.950816	0.901648	0.945744	0.906926	0.974993	0.958164	0.921197	0.88544	0.951991	0.906926	0.900768	0.951114
YDR380W	ARO10	0.700988	0.565158	0.662659	0.55775	0.678547	0.739271	0.884134	0.739315	0.777852	0.627314	0.793993	0.695896
YDR381W	YRA1
YDR382W	RPP2B	0.992063	0.996738	0.998226	0.999161	0.996602	0.998226	0.996782	0.998131	0.996136	0.999161	0.99546	0.997382
YDR383C	NKP1	0.872167	0.750404	0.923418	0.907796	0.902773	0.915387	0.704207	0.868685	0.865526	0.894679	0.634363	0.904751
YDR384C	ATO3	0.961895	0.94022	0.979303	0.985486	0.973673	0.976751	0.949723	0.976437	0.973673	0.985486	0.955534	0.972162
YDR385W	EFT2	0.995221	0.984743	0.99629	0.996472	0.995025	0.99629	0.986021	0.996472	0.996552	0.996472	0.984743	0.99629
YDR386W	MUS81	0.951454	0.934015	0.954917	0.887891	0.95548	0.964753	0.953997	0.913474	0.935396	0.895356	0.929815	0.951757
YDR387C	CIN10	0.978023	0.961481	0.974054	0.947522	0.973227	0.97033	0.945532	0.947012	0.974862	0.956144	0.919983	0.973133
YDR388W	RVS167	0.927071	0.909503	0.968128	0.959405	0.9548	0.972484	0.915904	0.96535	0.872388	0.933161	0.905924	0.969015
YDR389W	SAC7	0.64246	0.851286	0.757867	0.687347	0.709115	0.754495	0.834689	0.657598	0.691461	0.71126	0.854597	0.636626
YDR390C	UBA2	0.731326	0.592295	0.258902	0.460247	0.865043	0.649051	0.724658	0.627462	0.581605	0.624975	0.710156	0.628835
YDR391C	YDR391C	0.980819	0.978715	0.990459	0.992147	0.987046	0.989998	0.988064	0.990723	0.987039	0.985617	0.98049	0.988416
YDR392W	SPT3	0.923495	0.899031	0.929736	0.898963	0.939211	0.952456	0.912539	0.89633	0.885884	0.901125	0.905728	0.92841
YDR393W	SHE9	0.860658	0.638081	0.555674	0.367331	0.831533	0.621237	0.614318	0.440067	0.850983	0.445904	0.655522	0.662493
YDR394W	RPT3	0.85694	0.713681	0.903233	0.935262	0.85694	0.903233	0.837968	0.935262	0.85694	0.935262	0.713681	0.903233
YDR395W	SXM1	0.985634	0.969812	0.980347	0.98985	0.97785	0.986003	0.981926	0.992851	0.985634	0.986269	0.979101	0.984013
YDR396W	YDR396W
YDR397C	NCB2	0.647417	0.783226	0.87747	0.844326	0.696026	0.66271	0.882537	0.644226	0.634671	0.648406	0.843863	0.690171
[truncated: 5,342 more rows]

## Sheet: cross_NN_top_of_5_gene
ORF	GeneName	cer_by_par	par_by_cer	hyc_by_hyp	hyp_by_hyc	cer_by_hyc	hyc_by_cer	par_by_hyp	hyp_by_par	cer_by_hyp	hyp_by_cer	par_by_hyc	hyc_by_par
[truncated: 6,650 more rows]
