# Supplementary material for: Independent evolution of transcript abundance and gene regulatory dynamics
Source: HighWire-hosted journal article supplement (doi:10.1101/gr.261537.120), 2020-07-01
Supplement: Supplemental_Table_S11.xlsx [file Supplemental_Table_S11.xlsx]

## Sheet: description
Table S11	counts table: counts strict cer

## Sheet: Sheet1
ORF	PHD1_TP3_cer_C1_E4_H7_GS3	FKH1_TP3_cer_C1_A1_B1_GS3	MIG1_TP2_hyb_P3H1_B6_D10_GS6	DAL80_TP2_hyb_H2_B6_E11_GS4	CHA4_TP2_hyb_H3_B1_C4_GS12	ARG81_TP2_par_remnants2_H2_F9_GS8	HAP5_TP1_cer_C3_E5_C12_GS7	AFT1_TP1_hyb_P3H1_C3_H4_GS6	MET28_TP2_cer_C1_C6_D12_GS1	SKN7_TP3_par_P3H1_A4_D7_GS7	DAL80_TP3_hyb_H2_B3_E5_GS4	SOK2_TP2_hyb_P3H1_C5_A8_GS6	MIG1_TP1_cer_P4C2_G4_D10_GS9a	HAP5_TP2_cer_C3_E2_C6_GS8	YAP1_TP2_hyb_P3H1_G2_C3_GS6	DAL80_TP2_par_P1_G2_E5_GS2	PHD1_TP2_cer_remnants_A4_H1_GS10	ACE2_TP1_cer_C3_A1_A1_GS7	WT_TP3_par_P5_D3_G6_GS14	CBF1_TP1_cer_slow_E3_H3_GS10	HAP2_TP3_hyb_H3_E4_H11_GS12	TEC1_TP3_cer_C1_H1_D2_GS3	HAP5_TP3_cer_C3_E2_C6_GS8	WT_TP2_cer_C1_G6_G12_GS1	DAL80_TP3_cer_C3_C2_E5_GS8	URE2_TP3_hyb_H2_E4_G7_GS4	MET28_TP2_par_P5_A5_D12_GS13	GLN3_TP1_hyb_remnants_E6_C11_GS9b	STB5_TP3_par_P4C2_G2_B3_GS10	GCR2_TP3_par_remnants2_E5_G4_GS13	WT_TP2_par_P5_D6_G12_GS13	SWI4_TP2_par_P1_D1_E1_GS2	WT_TP1_par_P5_E5_G12_GS13	NRG1_TP2_hyb_H2_G5_E10_GS4	SOK2_TP2_cer_C1_F4_A8_GS1	STB5_TP1_cer_P4C2_C4_B9_GS9a	RTG1_TP1_cer_P4C2_E5_E12_GS9a	HAP5_TP2_par_P4C2_F3_C6_GS9b	URE2_TP2_cer_C1_D4_G7_GS1	GCR2_TP1_par_remnants2_E5_G4_GS7	BAS1_TP2_cer_slow_B1_G3_GS11	MBP1_TP3_cer_C1_B4_C7_GS3	HAP2_TP2_par_P2_A6_H11_GS5	WT_TP2_hyb_H3_C5_G12_GS12	MBP1_TP2_cer_C1_B1_C1_GS1	TEC1_TP2_hyb_H2_A5_D8_GS4	RPN4_TP3_hyb_remnants_G6_G11_GS11	AFT1_TP3_hyb_P3H1_C6_H10_GS7	MSN2_TP3_cer_C1_B2_F2_GS3
YAL001C	60	43	16	7	73	0	33	8	97	2	19	21	108	14	9	0	100	24	0	23	43	65	88	48	45	20	0	13	0	0	0	0	0	25	81	53	75	6	36	0	7	81	0	54	144	22	66	29	113
YAL002W	46	50	14	1	49	0	25	15	38	0	20	11	41	3	3	0	32	12	0	23	8	94	47	16	50	2	0	5	0	0	0	0	0	21	47	33	22	1	25	0	28	63	0	9	49	5	37	19	67
YAL003W	789	645	107	78	590	12	1910	671	383	172	239	178	5390	57	191	121	389	1450	15	1274	533	1165	463	589	655	137	30	599	11	13	23	41	53	112	340	3833	1463	57	283	215	188	982	32	682	383	120	768	309	859
YAL004W
YAL005C	825	719	44	28	184	13	976	160	280	132	360	33	2848	57	14	2	274	660	1	468	450	1118	739	254	1476	180	3	227	7	0	0	1	0	75	132	1629	795	24	370	184	397	939	1	134	161	95	807	311	748
YAL007C	105	63	47	25	162	4	193	42	53	10	58	74	393	6	40	0	130	140	0	178	101	162	83	190	75	39	0	29	2	2	0	0	0	38	93	314	106	4	41	15	67	121	1	109	101	24	107	62	91
YAL008W	95	66	27	10	70	0	39	9	23	3	36	20	37	8	9	0	133	41	0	48	56	129	55	70	58	21	0	5	0	0	0	0	0	33	67	57	15	1	27	2	83	98	0	19	64	22	62	39	34
YAL009W	27	30	22	9	47	0	29	9	58	2	20	21	68	3	6	0	85	34	0	40	33	37	37	68	30	6	0	9	0	0	0	0	0	22	66	80	35	0	10	5	48	46	0	9	76	4	20	21	46
YAL010C	22	14	6	0	57	0	25	2	117	3	3	11	28	3	3	0	28	23	0	9	32	26	14	6	27	3	0	9	0	0	0	0	0	6	27	44	15	0	6	5	34	21	0	15	61	14	32	11	25
YAL011W	28	18	2	2	17	0	21	13	3	5	10	3	45	0	6	0	32	11	0	25	18	44	5	12	21	0	0	4	0	0	0	0	0	2	22	22	14	0	1	0	16	16	0	6	14	0	9	15	16
YAL012W	670	595	1721	1101	7326	12	1078	383	3044	59	250	1956	3097	96	142	0	4625	692	0	432	754	881	379	2705	682	118	4	294	7	0	9	0	0	2096	4404	2356	859	46	1243	80	3136	726	3	708	4805	1649	532	308	581
YAL013W	62	38	35	29	112	0	75	17	87	13	28	31	146	2	17	0	160	53	1	10	99	116	65	112	51	15	1	22	0	0	1	0	0	54	142	195	53	6	67	3	116	74	0	25	221	39	76	77	59
YAL014C	75	35	46	13	173	0	40	17	150	1	9	37	51	2	6	0	133	25	0	45	34	84	27	37	24	2	0	7	1	0	0	0	0	37	93	101	23	2	34	8	73	63	2	27	88	20	45	30	60
YAL015C	34	20	24	12	102	0	34	14	192	8	22	23	88	6	10	0	41	17	0	31	60	30	31	55	47	12	1	15	0	0	0	0	0	37	146	46	30	0	47	3	40	39	1	31	150	26	31	25	13
YAL016W	156	143	88	37	310	4	173	56	210	10	56	77	368	31	33	0	258	153	0	84	175	182	144	143	162	39	0	72	1	0	0	0	0	84	217	253	136	6	83	18	108	160	4	129	344	59	186	66	156
YAL017W	194	103	50	42	243	0	59	8	192	8	70	40	81	13	16	0	127	36	0	36	132	146	90	97	165	29	0	14	1	0	0	0	0	66	156	103	35	1	105	14	99	158	0	33	235	35	116	66	128
YAL018C	0	0	0	1	0	0	0	0	5	0	5	0	0	0	0	0	0	0	0	0	0	0	0	0	0	0	0	0	0	0	0	0	0	0	1	0	0	0	0	0	3	3	0	12	4	1	0	0	0
YAL019W	28	42	4	3	33	0	83	32	8	4	6	12	168	4	8	0	19	41	0	37	33	99	19	56	33	3	0	15	0	0	0	0	0	3	3	72	57	2	14	5	15	68	0	37	41	2	34	17	48
YAL020C	82	74	16	10	105	2	65	20	278	2	18	20	327	21	19	0	94	54	0	59	63	115	77	155	83	16	0	36	0	0	0	0	0	45	141	243	60	1	66	0	91	61	0	69	292	18	119	31	58
YAL021C	75	65	25	8	58	0	36	36	44	3	27	14	176	5	7	1	95	29	0	47	40	101	37	43	46	8	0	14	1	0	0	0	0	18	15	78	27	0	8	3	20	129	0	34	61	29	36	28	62
YAL022C	77	51	22	20	217	3	114	26	241	10	50	28	308	22	19	0	114	90	0	92	114	123	95	106	107	22	0	34	0	0	0	0	0	49	200	324	96	0	115	3	137	55	1	42	211	36	134	49	59
YAL023C	194	169	45	39	272	0	422	136	101	22	66	95	992	19	65	0	249	272	0	297	148	255	152	232	170	52	0	74	3	0	0	0	0	56	129	850	241	2	135	13	18	270	0	196	130	76	216	95	170
YAL024C	56	53	12	4	50	0	47	6	27	0	22	9	57	13	10	0	19	36	0	29	36	67	23	35	53	6	0	8	0	0	0	0	0	37	51	62	18	0	20	0	12	77	0	6	31	8	25	22	59
YAL025C	154	146	13	5	34	0	295	136	114	25	9	28	674	40	41	0	69	212	0	179	78	301	87	245	83	11	0	59	2	0	0	0	0	10	93	562	328	2	52	14	54	161	0	92	93	15	52	60	193
YAL026C	71	108	37	24	172	0	129	31	108	4	14	47	211	12	16	0	35	68	0	4	77	143	62	104	90	17	0	21	0	0	0	0	0	31	134	181	85	0	80	0	63	106	1	60	134	20	106	39	107
YAL027W	22	24	14	11	32	1	8	8	50	0	12	12	54	0	1	0	25	16	0	25	6	30	7	27	14	12	0	2	0	0	0	0	0	6	45	58	8	0	15	1	2	14	0	41	27	3	34	20	24
YAL028W	29	21	15	13	50	0	4	0	44	1	21	22	16	0	0	0	47	5	0	7	6	8	26	9	12	5	0	6	1	0	0	0	0	4	24	18	4	0	4	1	13	6	0	14	84	2	28	3	11
YAL029C	201	154	39	30	148	1	276	57	242	25	60	50	452	37	48	0	153	166	0	163	114	295	157	232	150	40	0	48	7	0	0	0	0	51	218	401	188	4	84	25	60	238	0	79	195	39	87	124	213
YAL030W	358	258	157	75	557	5	242	56	341	11	275	202	361	59	63	0	584	206	0	175	244	466	242	234	338	103	0	43	7	0	0	0	0	202	350	415	172	6	107	11	193	341	0	147	358	152	308	320	361
YAL031C	54	46	21	22	98	0	24	10	75	1	24	30	85	2	5	0	30	26	0	14	85	58	52	12	44	7	0	5	1	0	0	0	0	23	35	39	11	0	53	8	40	44	0	10	72	28	86	31	42
YAL032C	31	69	13	12	30	0	33	10	105	2	16	20	92	11	2	0	53	54	0	19	26	53	39	59	36	15	0	9	1	0	0	0	0	18	53	96	36	3	23	5	34	49	0	19	98	15	60	29	44
YAL033W	72	35	17	4	137	0	63	21	24	1	11	35	121	3	6	0	44	44	0	48	26	45	42	28	90	15	0	9	3	0	0	0	0	32	22	74	32	0	31	5	25	38	0	17	61	12	71	26	59
YAL034C	100	43	19	13	25	0	47	21	75	5	34	17	65	6	8	0	93	32	0	39	57	106	80	43	92	28	0	10	0	0	0	0	0	32	82	83	39	0	55	6	22	85	0	6	42	19	29	67	73
YAL035W	206	207	23	22	159	4	521	225	199	18	50	39	1414	34	61	1	149	405	0	464	190	342	130	439	143	25	0	150	3	0	0	4	0	56	209	1243	602	1	73	60	83	231	0	271	273	49	219	88	250
YAL036C	131	127	13	9	75	1	254	145	150	23	23	30	655	12	28	0	62	207	0	121	95	206	43	164	105	13	0	41	0	0	0	0	0	26	113	530	199	10	84	19	13	128	0	79	143	17	80	25	143
YAL037W	8	10	7	4	10	0	20	6	1	0	7	2	29	0	2	0	9	13	0	20	2	17	7	6	17	3	0	0	0	0	0	0	0	1	6	12	0	1	4	0	5	14	0	0	7	3	0	10	9
YAL038W	2371	1912	512	249	2543	47	4556	1156	1200	185	693	665	10788	345	688	0	1446	2962	3	2993	1831	3487	1727	2571	2440	416	1	984	21	0	3	6	2	740	1552	8073	2655	49	710	294	705	2700	9	2038	1443	460	1715	885	3001
YAL039C	91	67	51	40	190	1	40	64	102	1	87	56	251	14	27	0	142	34	0	44	148	136	107	93	122	37	0	59	1	0	0	1	0	74	107	198	74	3	127	4	42	114	0	83	166	39	162	67	117
YAL040C	61	68	35	7	54	0	54	40	73	1	65	30	82	6	11	0	47	26	0	49	43	142	40	5	48	3	0	20	0	0	0	0	0	18	33	58	38	0	5	5	24	135	0	12	54	16	46	18	121
YAL041W	55	34	23	17	136	0	53	9	112	1	32	28	178	9	6	0	62	39	0	49	159	60	44	48	77	13	0	21	0	0	0	0	0	20	134	121	54	1	38	8	37	56	0	24	88	14	22	42	46
YAL042W	330	267	142	81	474	2	671	213	522	34	107	245	1604	77	90	0	454	414	0	416	350	504	290	526	347	86	0	143	6	0	0	1	0	136	470	1342	472	4	283	29	295	331	0	237	575	94	279	212	339
YAL043C	88	75	37	12	189	0	129	41	344	10	37	32	396	29	3	0	127	127	0	101	84	104	70	155	91	28	0	40	3	0	0	0	0	52	203	283	128	6	113	20	86	107	0	56	252	40	100	43	103
YAL044C	918	599	410	231	1482	14	674	127	1315	28	294	400	1624	133	214	0	1288	443	0	496	781	906	751	1311	941	176	0	120	9	0	0	0	0	349	1497	1064	431	37	339	34	150	690	1	574	1576	308	1038	391	907
YAL045C
YAL046C	64	54	27	7	71	0	56	18	57	2	42	38	188	20	23	0	83	51	0	73	90	105	31	60	86	6	0	21	2	0	0	0	0	45	58	131	25	1	42	0	21	54	0	46	90	28	73	22	70
YAL047C	11	15	9	0	23	0	39	1	49	0	5	12	76	0	2	0	45	18	0	11	67	29	24	28	51	9	0	11	0	0	0	0	0	8	11	66	17	0	19	0	29	26	0	0	24	4	12	19	25
YAL048C	0	0	0	0	0	0	0	0	0	0	0	0	0	0	0	0	0	3	0	2	0	2	0	0	0	0	0	0	0	0	0	0	0	0	6	0	0	0	0	0	0	0	0	0	0	0	1	0	0
YAL049C	321	250	87	20	342	1	148	51	272	1	190	74	311	23	25	0	198	142	0	88	266	363	255	119	314	99	0	47	1	0	0	0	0	96	161	265	80	2	128	4	144	310	0	103	202	77	223	156	335
YAL051W	57	45	14	13	64	0	43	4	39	1	17	18	81	1	2	0	52	43	0	17	18	76	59	28	66	16	0	6	3	0	0	0	2	29	46	120	36	0	38	2	12	54	0	22	72	6	15	20	58
YAL053W	168	152	53	27	265	1	124	79	228	5	64	46	258	19	24	0	160	95	0	117	95	210	128	228	172	50	0	48	1	0	0	0	0	51	220	245	122	6	162	13	102	187	0	51	240	45	101	67	111
YAL054C	32	40	14	3	26	0	19	3	12	0	13	8	29	5	2	0	56	4	0	20	12	46	20	13	23	8	0	4	0	0	0	0	0	4	18	21	14	2	27	1	14	74	0	0	8	17	9	19	28
YAL055W	67	26	21	1	106	0	36	16	108	0	26	31	26	6	3	0	53	24	0	10	30	83	39	15	62	12	0	10	0	0	0	0	0	22	59	60	20	0	1	3	40	52	0	26	110	7	40	7	38
YAL056W	88	102	38	16	137	0	41	8	141	0	66	28	118	14	13	0	238	37	0	40	157	126	90	53	142	40	0	10	0	0	0	0	0	49	196	96	40	1	62	3	33	141	0	52	117	46	163	35	111
YAL058W	35	19	13	13	42	0	43	8	86	0	9	36	130	2	7	0	51	24	0	26	32	61	34	47	43	2	0	18	1	0	0	0	0	13	60	190	56	0	29	5	45	40	0	13	71	8	50	11	42
YAL059W	52	46	1	0	7	1	69	50	17	1	13	12	260	0	14	0	50	75	0	34	24	79	52	25	29	2	0	21	0	0	0	0	0	4	23	132	35	2	15	24	18	57	0	22	48	0	70	25	46
YAL060W	244	261	138	44	471	1	132	14	282	8	199	89	338	33	21	0	287	52	0	64	413	391	305	254	519	90	0	26	2	0	0	0	0	117	263	258	69	5	174	19	226	287	0	45	358	70	535	168	223
YAL061W	133	170	44	23	99	0	19	0	154	3	158	28	15	14	4	0	153	14	0	4	171	199	329	58	366	130	0	5	3	0	0	0	0	65	207	40	1	1	82	11	189	191	0	13	178	31	284	128	73
YAL062W	74	45	32	9	44	0	5	0	62	8	331	5	15	3	6	0	86	4	0	7	93	120	37	95	497	14	0	3	0	0	0	0	0	25	24	9	1	2	21	2	54	70	0	0	67	18	136	37	81
YAL063C	0	2	0	0	7	0	0	1	3	0	0	1	0	0	0	0	1	0	0	9	0	0	4	2	5	0	0	0	0	0	0	0	0	4	0	0	0	0	0	0	0	3	0	0	3	0	0	0	0
YAL064W
YAL065C	3	0	0	0	0	0	0	0	0	0	0	0	0	0	0	0	0	5	0	0	0	0	0	0	0	0	0	0	0	0	0	0	0	0	0	0	0	0	0	0	0	0	0	0	0	0	0	0	1
YAL066W
YAL067C	82	74	392	192	1080	0	0	1	828	0	29	232	14	7	7	0	528	1	0	1	42	44	8	165	14	2	0	4	0	0	0	0	0	337	926	19	5	6	151	2	554	59	0	27	769	245	7	53	51
YAL068C
YAL069W
YAR002W	100	53	18	13	93	0	79	49	62	4	22	15	93	6	15	0	73	42	0	82	68	87	38	78	52	6	0	26	1	0	0	0	0	16	47	141	30	0	54	0	65	80	0	72	93	19	87	31	64
YAR003W	4	7	10	3	26	0	2	0	20	0	3	5	9	0	1	0	9	5	0	1	32	7	1	24	2	0	0	3	0	0	0	0	0	8	24	12	1	0	14	1	0	5	0	4	18	10	11	9	3
YAR007C	94	62	58	40	194	4	111	33	199	7	54	59	185	14	21	0	162	70	0	63	101	67	45	216	68	52	0	49	0	0	0	0	0	71	164	136	48	10	142	6	55	159	0	74	204	50	172	46	82
YAR008W	27	18	9	13	66	0	42	15	16	0	8	16	108	3	0	0	67	21	0	30	45	14	28	45	26	2	0	13	0	0	0	0	0	7	27	80	13	3	26	0	2	30	0	6	45	8	38	10	20
YAR009C
YAR010C
YAR014C	81	75	28	25	156	0	80	34	138	1	22	27	268	2	12	0	102	75	0	72	92	124	63	80	116	14	0	33	0	0	0	0	0	34	177	204	66	5	18	8	21	128	0	36	191	29	32	36	117
YAR015W	400	311	107	45	524	5	683	120	601	25	127	95	1446	67	78	0	415	425	0	150	443	499	313	778	409	87	0	80	3	0	0	0	0	133	853	1328	404	10	93	26	71	418	0	287	825	82	365	298	385
YAR018C	67	43	12	7	102	0	39	13	46	2	26	19	96	3	8	0	30	16	0	20	37	50	36	27	40	8	0	4	1	0	0	0	0	21	40	83	31	1	1	0	67	78	0	26	73	12	78	31	55
YAR019C	41	42	12	10	45	0	26	6	56	0	23	12	62	2	6	0	26	23	0	6	36	33	34	31	41	10	0	6	0	0	0	0	0	26	57	35	7	1	11	1	7	41	0	38	36	3	43	9	23
YAR020C	0	7	7	2	5	0	10	0	29	0	5	3	14	0	0	0	58	8	0	0	21	6	6	14	3	0	0	0	0	0	0	0	0	2	41	2	0	0	9	0	17	13	0	1	29	0	28	5	7
YAR023C	2	8	10	4	5	0	2	0	16	0	2	6	4	0	1	0	26	4	0	0	0	2	3	1	3	0	0	0	0	0	0	0	0	5	17	2	0	0	0	0	12	4	0	0	8	6	0	4	4
YAR027W	62	69	71	20	144	0	68	23	118	1	66	45	161	17	5	0	153	33	0	46	81	117	107	94	107	23	0	25	0	0	0	0	0	68	160	127	34	0	59	0	67	66	0	5	134	24	132	56	72
YAR028W	14	0	5	1	0	0	16	5	23	2	3	2	34	0	5	0	6	21	0	11	0	6	10	0	5	5	0	1	0	0	0	0	0	5	49	46	0	0	11	0	3	14	0	6	18	5	0	1	6
YAR029W	2	1	0	0	21	0	7	4	36	7	2	1	15	0	0	0	0	6	0	6	0	5	0	3	5	0	0	4	0	0	0	0	0	6	7	41	2	0	7	0	9	9	0	6	12	3	0	0	0
YAR030C
YAR031W	0	3	1	3	16	0	8	1	16	0	0	4	21	0	0	0	1	3	0	5	5	0	2	10	1	0	0	4	0	0	0	0	0	1	12	13	0	0	2	0	3	2	0	1	13	5	0	0	5
YAR033W	7	18	6	6	12	0	14	11	40	0	2	12	57	4	3	0	39	17	0	22	12	1	5	15	5	13	0	9	0	0	0	0	0	10	17	16	2	0	1	0	53	9	0	8	43	5	4	8	5
YAR035W	36	22	0	2	18	0	16	2	17	0	5	20	43	1	1	0	18	1	0	24	22	25	31	26	30	15	0	4	11	0	0	0	0	9	49	93	10	1	29	0	44	26	0	4	55	7	23	11	43
YAR042W	138	97	18	13	75	1	60	29	35	1	33	17	117	4	4	0	54	67	0	81	51	122	40	43	64	33	0	17	1	0	0	0	0	21	57	108	40	3	61	9	55	122	0	19	46	9	66	34	137
YAR047C
YAR050W	6	2	1	0	3	0	4	36	1	0	0	10	8	0	6	0	9	5	0	2	10	0	5	15	1	0	0	10	0	0	0	0	0	0	3	10	0	0	0	0	0	0	0	27	8	3	25	2	6
YAR053W
YAR060C
YAR061W
YAR062W
YAR064W
YAR066W
YAR068W	14	1	4	0	33	0	7	1	28	0	3	13	5	0	6	0	0	12	0	10	13	14	8	12	2	8	0	8	0	0	0	0	0	2	16	25	3	0	6	1	0	7	0	24	10	11	23	4	10
YAR069C
YAR070C
YAR071W
YAR073W
YAR075W
YBL001C	601	492	167	63	495	2	305	85	410	15	194	251	588	71	116	0	797	212	0	349	485	727	469	538	637	97	0	75	16	0	0	0	0	162	685	487	362	6	182	5	176	533	0	179	343	74	437	318	450
YBL002W	1450	1151	212	119	913	15	1717	422	765	55	571	219	4425	238	284	6	802	1554	7	1069	1508	1927	1063	1639	1101	390	0	255	10	6	4	9	2	418	739	2699	1685	34	387	66	537	1486	0	818	793	296	1988	948	1986
YBL003C	1154	964	367	222	1123	27	1703	595	934	68	639	365	4033	231	619	2	691	1948	0	901	1442	1527	828	1463	1103	406	4	286	13	9	0	1	1	468	711	2376	1546	27	400	93	493	1200	4	1012	789	346	2290	1099	1318
YBL004W	124	89	9	1	40	0	203	132	81	6	22	15	302	2	34	0	66	152	0	157	94	162	72	153	75	28	0	31	3	0	0	0	0	8	42	265	359	1	20	14	33	153	0	49	67	14	155	90	148
YBL005W	16	17	1	0	25	0	13	2	19	0	2	1	36	0	0	0	21	5	0	6	0	14	2	34	7	0	0	7	0	0	0	0	0	3	18	21	22	0	10	0	0	6	0	3	36	4	0	2	5
YBL006C	189	120	66	25	281	3	184	39	215	1	61	105	309	34	46	0	260	118	0	144	149	230	154	200	165	61	0	42	0	0	0	0	0	62	254	397	272	4	76	3	195	146	0	77	222	53	190	89	146
YBL007C	320	201	118	37	415	1	275	77	308	26	127	145	801	42	81	0	365	164	0	183	282	321	205	272	234	80	0	49	2	0	0	0	0	96	375	661	468	15	134	17	302	293	2	200	488	85	234	129	280
YBL008W	18	35	7	4	19	0	34	8	21	4	25	13	55	1	3	0	19	15	0	34	19	44	17	23	18	7	0	6	1	0	0	0	0	5	50	38	45	0	0	5	0	23	0	3	31	6	31	21	36
YBL009W	60	36	12	6	39	0	55	16	13	10	7	10	149	9	5	0	32	33	0	28	20	64	35	56	15	9	0	12	2	0	0	0	0	16	52	70	60	1	21	8	18	81	0	10	54	9	59	24	55
YBL010C	27	31	2	1	69	0	25	4	35	0	2	9	33	0	3	0	29	15	0	30	2	36	17	31	20	11	0	4	0	0	0	0	0	14	21	20	20	2	20	0	4	27	0	4	40	10	50	25	23
YBL011W	41	33	12	5	88	0	68	25	49	4	16	18	128	14	16	0	58	49	0	68	50	69	41	42	24	12	0	11	0	0	0	0	0	12	80	124	97	4	17	10	48	48	0	70	73	30	62	12	60
YBL012C
YBL013W	0	0	0	0	0	0	0	0	7	0	1	0	0	0	0	0	0	0	0	0	0	4	0	3	0	0	0	0	0	0	0	0	0	0	0	0	0	0	0	0	0	0	0	0	0	0	0	0	0
YBL014C	84	37	6	8	61	0	51	26	39	4	16	9	160	9	8	0	74	39	0	33	22	97	47	55	34	11	0	17	1	0	0	0	0	14	46	182	119	1	9	2	5	43	0	23	75	6	76	7	71
YBL015W	78	55	35	13	109	0	36	21	120	2	46	35	56	15	10	0	68	23	0	35	61	92	63	34	84	4	0	15	0	0	0	0	0	31	88	56	79	0	43	8	25	118	0	8	64	13	51	36	85
YBL016W	6	6	2	0	0	0	0	0	37	0	0	0	0	0	1	0	26	5	0	0	8	0	13	0	6	0	0	2	0	0	0	0	0	2	23	3	2	0	1	0	9	5	0	0	32	0	0	0	2
YBL017C	266	246	86	57	318	0	259	68	280	14	105	85	695	43	72	0	285	208	0	161	278	411	230	344	309	66	0	60	2	0	0	0	0	110	461	672	453	6	120	7	245	310	0	104	274	51	329	199	277
YBL018C	63	55	10	2	91	0	71	35	46	3	19	19	256	17	30	0	124	76	0	138	67	88	81	90	62	15	0	22	0	0	0	0	0	23	106	206	133	2	33	5	25	64	0	13	61	8	17	35	69
YBL019W	33	16	13	9	63	0	45	3	48	0	19	8	17	2	2	0	50	6	0	13	34	45	16	5	24	5	0	4	0	0	0	0	0	17	39	19	11	2	1	0	38	15	0	9	49	12	12	19	23
YBL020W	16	19	1	3	37	0	22	10	13	2	18	8	65	4	6	0	31	54	0	11	21	26	17	33	25	7	0	15	0	0	0	0	0	18	23	56	12	0	4	1	28	25	0	5	14	4	17	6	32
YBL021C	34	38	13	18	134	2	64	15	79	1	27	22	117	3	9	0	70	20	0	19	70	61	35	45	46	20	0	11	0	0	0	0	0	27	39	107	91	0	52	1	13	34	0	38	90	24	22	18	51
YBL022C	102	84	47	27	265	3	160	63	206	7	59	71	603	33	34	0	174	86	0	95	102	164	99	237	181	37	0	75	0	0	0	0	0	78	154	357	278	3	56	15	88	89	0	160	167	61	110	83	116
YBL023C	55	54	14	23	69	0	72	30	59	4	40	15	115	3	10	0	90	62	0	74	80	69	36	67	49	8	0	15	0	0	0	0	0	14	38	108	99	1	7	19	18	57	0	15	73	17	41	23	68
YBL024W	114	132	15	12	91	0	212	110	35	9	26	9	529	19	28	0	86	203	0	132	61	260	48	96	58	8	0	39	1	0	0	0	0	10	79	289	286	4	27	22	10	160	0	91	67	14	123	48	119
YBL025W	5	1	1	1	9	0	1	0	0	0	1	0	2	0	0	0	13	1	0	4	13	0	0	1	4	2	0	2	1	0	0	0	0	0	6	12	0	0	1	0	0	1	0	0	4	0	4	0	1
YBL026W	204	158	71	36	215	12	292	83	124	7	68	83	477	37	78	0	132	194	0	279	138	178	117	206	126	38	0	25	3	0	0	0	0	46	193	325	268	3	34	23	86	164	0	153	114	34	138	109	109
YBL027W
YBL028C	111	77	7	13	26	0	140	85	27	9	8	17	234	5	24	0	39	124	0	115	52	181	51	85	39	2	0	25	0	0	0	0	0	20	33	215	190	3	24	7	5	91	0	113	69	4	44	25	101
YBL029W	102	59	12	0	40	1	19	9	14	0	19	22	24	12	1	0	12	20	0	19	42	96	69	21	63	27	0	4	2	0	0	0	0	7	45	14	49	0	11	3	17	132	0	5	57	10	100	37	100
YBL030C	708	559	277	87	617	8	311	199	253	31	335	262	737	44	207	8	471	181	0	162	465	784	204	427	540	139	0	179	3	1	1	0	0	184	327	489	269	6	120	22	51	807	1	383	338	150	739	399	694
YBL031W	69	56	20	12	26	1	30	24	22	0	25	16	27	8	27	1	40	53	0	22	12	64	33	17	47	4	2	8	1	3	0	0	0	22	28	44	23	0	1	3	10	64	0	18	51	6	34	21	67
YBL032W	176	156	53	12	224	0	329	55	138	30	61	52	612	15	46	0	207	180	0	232	178	221	126	205	175	23	0	37	7	0	0	0	0	46	141	408	294	9	77	55	66	213	1	125	144	79	96	86	176
YBL033C	83	48	30	4	85	3	65	23	52	1	42	27	131	20	31	0	77	23	0	78	44	97	90	121	108	21	0	25	1	0	0	0	0	18	69	83	99	4	31	9	36	113	0	67	44	16	82	42	100
YBL034C	71	51	13	15	49	1	52	18	56	5	31	12	127	8	1	0	46	42	0	34	34	47	45	25	43	13	0	15	1	0	0	0	0	5	17	84	47	2	21	10	7	65	0	12	29	16	27	35	33
YBL035C	39	8	10	13	145	0	42	10	57	3	25	23	123	8	11	0	84	50	0	31	31	26	18	93	13	8	0	14	2	0	0	0	0	29	50	108	45	0	56	0	39	55	1	11	113	35	35	23	44
YBL036C	107	84	30	14	105	0	157	48	69	3	42	42	340	13	33	0	113	134	0	165	75	177	58	95	88	26	0	36	1	0	0	0	0	31	71	210	107	2	58	11	19	106	0	27	65	25	55	56	71
YBL037W	72	74	26	6	59	2	91	23	58	6	54	15	200	12	21	0	45	82	0	70	111	100	39	82	68	7	0	18	1	0	0	0	0	28	81	106	148	1	54	2	18	90	0	44	88	37	79	27	72
YBL038W	75	56	52	11	121	0	81	61	93	0	38	39	211	8	17	0	110	49	0	61	95	75	51	74	91	12	0	38	0	0	0	0	0	42	70	99	122	1	27	5	35	57	0	54	75	29	95	62	34
YBL039C	105	90	2	5	68	0	261	100	17	21	14	14	448	5	45	0	47	214	0	200	40	199	52	99	48	6	0	83	1	0	0	0	0	6	50	432	284	2	22	26	5	167	0	59	71	9	79	35	129
YBL040C	144	87	81	47	330	1	196	69	312	4	86	72	405	12	41	0	250	155	0	169	221	212	106	249	181	43	0	57	2	0	0	1	0	84	232	438	305	5	117	17	48	125	0	122	216	73	114	89	112
YBL041W	116	142	56	26	206	4	130	55	182	5	53	63	367	12	30	0	214	109	0	239	124	159	78	189	100	37	0	47	0	0	1	0	0	31	132	290	156	1	48	15	66	131	0	100	155	50	74	53	145
YBL042C	119	115	7	1	13	0	129	42	74	2	31	13	266	1	12	0	83	121	0	124	59	202	101	104	152	22	0	34	2	0	0	0	0	9	130	381	266	1	74	8	63	103	0	47	119	6	19	46	122
YBL043W	57	46	5	6	23	1	23	6	36	9	26	22	19	4	15	10	55	11	4	4	5	50	20	54	64	6	2	5	0	2	5	6	5	7	28	15	15	2	10	19	12	55	4	7	24	5	32	19	55
YBL044W
YBL045C	391	255	279	106	903	1	99	78	433	17	181	149	468	38	81	1	515	116	0	132	217	362	125	388	367	114	0	119	3	0	0	0	0	227	405	517	175	3	171	7	220	297	5	330	405	161	496	327	327
YBL046W	38	43	49	25	90	3	44	24	101	7	27	24	63	14	20	0	79	50	0	28	69	60	40	38	43	3	0	8	1	0	0	0	0	26	94	67	87	6	33	1	16	65	0	44	128	31	60	20	47
YBL047C	271	231	111	70	413	3	202	79	259	10	167	85	499	57	39	0	335	129	0	171	329	368	255	234	340	125	0	68	4	0	0	0	0	121	309	356	384	2	98	8	207	324	0	185	306	93	243	174	261
YBL048W
YBL049W	92	86	11	0	30	0	0	0	11	0	91	18	0	2	0	0	46	5	0	12	78	101	72	13	121	19	0	1	1	0	0	0	0	5	35	11	0	0	33	0	23	88	0	1	48	8	47	55	106
YBL050W	172	139	97	22	227	3	156	23	422	0	96	94	329	10	25	3	247	82	0	154	275	190	145	146	246	68	0	44	9	0	0	0	0	97	252	261	164	2	190	8	89	146	1	47	236	46	157	119	140
YBL051C	126	114	39	2	133	0	159	53	69	11	34	43	219	9	29	1	91	90	0	86	123	194	56	148	120	28	0	20	0	0	0	0	0	27	53	290	154	0	56	16	103	152	5	22	87	25	97	51	210
YBL052C	61	71	25	24	99	1	86	26	78	4	36	37	162	10	26	0	84	78	0	71	47	64	69	110	57	21	0	14	1	0	0	0	0	34	91	172	122	3	62	7	32	80	0	25	54	18	78	34	88
YBL053W
YBL054W	85	85	2	3	20	0	131	97	23	5	11	12	275	11	26	0	35	136	0	77	13	151	43	47	33	5	0	42	0	0	0	0	0	6	30	238	180	3	6	9	0	104	0	68	47	3	37	22	112
YBL055C	45	34	6	9	43	0	56	25	44	9	24	19	31	4	10	1	23	53	1	27	33	42	16	48	30	1	0	15	0	0	0	0	0	3	26	79	42	1	22	1	9	31	0	22	47	1	5	13	29
YBL056W	107	79	50	21	134	4	115	27	216	15	48	38	289	3	20	0	203	58	0	79	145	132	83	213	127	35	0	23	1	0	0	0	0	56	80	115	129	4	74	12	19	104	1	48	158	62	167	59	115
YBL057C	77	51	41	30	144	2	126	35	152	3	39	36	404	11	31	0	86	90	0	124	129	102	63	166	78	24	0	35	7	0	0	0	0	37	128	276	163	7	75	7	21	49	0	74	166	35	85	43	55
YBL058W	140	111	72	42	236	5	192	49	229	12	80	110	435	30	34	0	386	154	0	148	142	191	107	210	179	43	0	54	2	0	0	0	0	92	201	370	236	11	112	23	133	111	0	121	225	64	180	93	134
YBL059W	40	11	30	13	80	0	33	14	44	0	19	27	74	9	11	0	50	14	0	19	24	36	27	36	37	6	0	18	0	0	0	0	0	29	62	54	57	0	13	0	5	33	0	16	43	2	66	31	27
YBL060W	32	21	16	9	26	0	15	6	56	3	17	9	77	8	5	0	53	12	0	32	15	32	32	38	50	6	0	11	0	0	0	0	0	24	82	67	38	1	21	0	90	47	0	25	103	2	11	7	39
YBL061C	59	42	27	12	41	1	80	38	71	18	24	13	125	5	28	0	68	57	0	63	15	87	33	104	86	21	0	16	0	0	0	0	0	36	97	219	191	1	40	0	10	96	0	34	115	16	109	28	71
YBL062W
YBL063W	27	32	5	2	25	0	5	5	23	1	11	2	17	4	3	0	41	3	0	8	2	33	16	7	11	5	0	0	0	0	0	0	0	16	20	25	40	0	14	0	0	20	0	0	3	0	37	17	38
YBL064C	312	183	170	82	348	4	78	20	296	7	221	83	230	38	11	0	425	51	0	44	242	303	259	193	404	126	0	27	2	0	0	1	0	113	249	108	96	4	209	3	152	254	0	35	264	70	429	259	181
YBL065W
YBL066C	20	31	2	0	23	1	14	3	7	0	5	5	22	0	4	0	6	10	0	10	17	22	14	0	41	11	0	5	0	0	0	0	0	3	6	31	29	0	23	0	0	34	0	49	6	0	32	11	16
YBL067C	43	54	12	12	90	0	46	15	76	15	8	14	111	7	10	0	45	22	0	46	44	115	28	35	58	8	0	11	1	0	0	0	0	11	17	53	62	0	5	2	24	71	0	10	28	5	33	34	64
YBL068W	79	42	3	11	64	0	192	49	71	2	24	11	547	6	15	0	83	116	0	82	33	115	46	112	77	16	0	50	1	0	0	0	0	6	66	319	201	2	31	7	17	106	0	30	111	22	107	27	71
YBL069W	32	31	6	6	41	0	64	17	28	8	3	7	88	4	14	0	8	37	0	32	26	61	13	41	40	7	0	8	0	0	0	0	0	8	23	94	44	0	6	6	7	44	0	26	57	3	48	5	27
YBL070C
YBL071C
YBL072C	688	552	41	55	349	12	1832	547	258	123	300	148	3448	97	327	15	277	1570	1	890	459	829	440	467	603	130	1	371	13	0	0	2	1	111	351	2210	1957	19	186	194	38	660	2	537	232	78	483	474	576
YBL073W
YBL074C	1	0	0	0	0	0	0	0	0	0	0	3	0	1	0	0	0	0	0	3	0	0	0	0	2	0	0	0	0	0	0	0	0	0	0	0	0	0	0	0	0	3	0	0	3	1	0	0	0
YBL075C	42	21	14	30	42	0	36	6	160	2	16	25	70	13	3	0	93	21	0	14	17	55	31	64	123	9	0	16	0	0	0	0	0	24	101	86	50	0	46	1	78	52	0	21	186	22	46	26	50
YBL076C	690	533	85	72	534	5	1359	309	358	67	200	186	2931	138	298	4	371	961	2	681	682	984	385	889	678	122	1	282	3	0	2	10	0	119	497	2431	1921	20	351	91	86	612	12	820	600	108	461	231	710
YBL077W
YBL078C	99	96	76	26	125	0	6	10	33	0	37	64	9	1	2	0	128	11	0	23	104	133	40	26	59	13	0	1	0	0	1	0	0	25	65	19	10	0	34	1	45	148	0	18	108	23	182	42	89
YBL079W	106	90	19	16	120	0	167	45	70	2	31	20	358	11	14	0	87	106	0	61	121	152	71	157	93	19	0	17	0	0	0	0	0	23	122	248	256	8	54	10	46	119	0	20	122	17	69	49	109
YBL080C	18	5	13	4	20	0	5	10	16	0	19	1	30	2	3	0	45	10	0	55	30	23	18	8	28	5	0	7	0	0	0	0	0	5	37	23	18	0	10	0	29	26	0	29	51	6	20	8	6
YBL081W	66	32	2	3	30	0	95	25	22	1	6	4	199	9	18	0	27	45	0	8	19	86	11	72	10	4	0	21	1	0	0	0	0	10	60	151	142	0	38	4	7	53	0	22	27	9	28	15	42
YBL082C	60	37	2	7	41	1	110	18	38	1	34	13	162	13	20	0	52	49	0	49	29	71	58	49	27	3	0	23	2	0	0	0	0	20	50	175	92	2	42	0	14	66	0	40	52	13	38	37	46
YBL083C
YBL084C	42	43	14	17	24	0	34	8	11	2	28	6	68	9	7	0	28	21	0	29	31	71	50	19	49	10	0	4	0	0	0	0	0	28	55	77	41	0	27	7	42	43	0	11	30	26	31	14	23
YBL085W	76	54	19	14	95	0	118	59	70	3	28	29	251	26	20	0	52	75	0	44	75	88	73	66	71	24	0	24	4	0	0	0	0	42	44	217	181	2	51	12	87	118	0	72	85	11	78	29	62
YBL086C	42	51	19	22	45	2	34	15	69	4	17	15	63	4	5	0	36	27	0	21	62	41	35	30	48	26	0	20	1	0	0	0	0	36	92	61	95	0	32	3	59	34	0	61	107	28	73	44	50
YBL087C
YBL088C	63	51	20	14	43	0	24	16	68	0	17	15	58	4	5	0	34	33	0	43	35	62	34	42	16	17	0	7	2	0	0	0	0	25	57	145	77	0	15	0	78	62	0	0	67	12	41	13	31
YBL089W	46	33	26	8	66	0	23	18	99	5	22	14	42	10	15	0	70	12	0	61	48	78	40	35	55	8	0	7	0	0	0	0	0	20	108	75	74	1	17	2	20	65	0	33	100	20	26	28	35
YBL090W	59	11	8	18	25	0	38	20	46	0	30	9	111	6	1	0	26	17	0	60	44	42	29	33	34	17	0	25	0	0	0	0	0	12	31	55	51	0	12	0	28	27	0	54	75	12	94	14	37
YBL091C	209	150	87	35	323	3	256	72	274	12	70	104	862	64	67	0	392	197	0	185	183	383	161	286	244	49	0	86	0	0	0	0	0	110	276	665	446	6	197	16	148	186	0	189	311	78	207	107	228
YBL092W	1807	1475	205	196	1014	12	7179	1846	660	509	614	491	15064	260	1197	14	833	5344	4	4229	1896	2673	1387	2075	2135	354	11	1399	19	4	10	3	6	334	1019	9327	7518	60	818	652	180	2048	20	2689	973	290	2262	1402	1527
YBL093C	103	55	29	13	182	0	88	50	154	6	29	31	191	5	15	0	97	65	0	57	61	105	93	165	69	24	0	25	0	0	0	0	0	26	102	168	92	7	54	1	50	93	0	3	192	13	90	41	62
YBL094C
YBL095W	108	111	40	48	118	1	27	13	78	4	57	24	91	8	16	0	48	35	0	21	174	142	135	69	158	33	0	16	1	0	0	0	0	62	107	91	104	0	47	4	45	147	0	63	175	14	203	47	137
YBL096C
YBL097W	11	3	7	6	4	0	12	4	12	6	4	7	3	2	5	11	9	12	3	7	8	25	2	18	3	0	2	2	1	3	3	2	2	9	15	11	2	0	12	5	10	9	14	13	21	1	8	4	17
YBL098W	35	42	11	12	64	0	32	16	49	2	30	17	67	4	36	1	51	21	1	29	41	46	28	41	57	3	0	18	0	0	0	0	0	19	58	70	26	1	11	2	6	30	2	67	41	24	29	35	23
YBL099W	716	527	428	116	1018	7	324	263	576	36	321	296	769	71	208	9	681	329	6	385	250	1047	173	618	614	149	0	132	7	0	6	1	0	326	496	535	258	7	203	23	220	820	1	347	544	188	691	395	671
YBL100C
YBL101C	93	82	43	26	98	0	30	11	90	0	32	19	98	9	3	0	134	4	0	33	70	163	37	63	63	27	0	3	4	0	0	0	0	21	136	80	42	2	24	1	27	106	0	17	145	21	48	54	136
YBL102W	175	143	116	51	287	0	82	41	396	4	89	97	303	23	75	0	297	79	0	103	157	268	138	237	140	46	0	41	3	0	0	0	0	68	349	142	147	4	104	6	130	156	0	170	299	58	254	103	189
YBL103C	31	30	7	4	41	0	8	11	35	0	6	3	25	6	5	0	37	8	0	22	13	57	32	30	56	0	0	4	0	0	0	0	0	4	12	18	29	2	2	0	5	30	0	11	49	6	27	12	40
YBL104C	43	40	26	17	55	1	84	11	99	12	47	11	149	15	9	0	79	61	0	48	75	110	54	53	86	16	0	13	0	5	0	0	0	31	84	195	67	2	20	6	41	55	0	23	100	14	60	27	65
YBL105C	73	41	20	10	45	0	67	6	38	3	22	20	113	8	16	0	67	35	0	32	43	76	27	62	54	12	0	17	0	0	0	0	0	27	107	116	53	1	13	12	16	64	0	46	73	9	41	31	58
YBL106C	37	11	7	4	50	0	21	14	74	1	13	11	71	0	2	0	53	16	0	13	25	27	39	71	21	1	0	4	1	0	0	0	0	10	30	44	64	0	39	0	31	13	0	28	79	16	20	10	15
YBL107C	27	51	12	7	111	0	75	45	27	0	10	29	147	6	12	0	58	41	0	78	48	44	33	54	23	8	0	20	0	0	0	0	0	27	55	95	50	1	23	2	33	47	0	62	39	16	49	44	49
YBL108W
YBL109W
YBL111C
YBL112C
YBL113C
YBR001C	126	103	52	58	176	2	46	5	246	1	70	41	74	13	11	0	197	30	0	26	131	161	116	73	201	48	0	20	1	0	0	0	0	60	257	117	134	1	67	2	116	135	0	46	209	51	82	49	167
YBR002C	47	35	6	6	33	0	68	40	39	0	10	17	116	3	4	0	14	26	0	54	20	48	36	23	10	6	0	19	0	0	0	0	0	11	18	123	104	0	9	0	17	40	0	19	37	7	41	26	32
YBR003W	85	58	65	27	151	0	71	41	129	9	37	62	129	8	30	0	93	45	0	54	58	56	54	75	87	18	0	17	0	0	0	0	0	57	171	75	108	0	43	2	66	98	0	105	155	35	102	50	82
YBR004C	54	22	15	5	96	0	88	14	79	5	27	16	97	10	7	0	72	50	0	72	9	45	18	32	23	11	0	15	0	0	0	0	0	20	86	69	80	0	37	1	17	67	0	95	63	8	34	17	50
YBR005W	38	42	14	10	67	0	17	20	71	0	15	15	99	1	10	0	42	15	0	7	19	53	35	36	61	13	0	9	0	0	0	0	0	10	45	48	21	2	98	0	62	36	0	37	112	10	43	22	38
YBR006W	143	121	66	51	256	3	22	16	198	1	141	71	23	9	17	0	276	25	0	44	142	156	179	189	232	43	0	2	0	0	0	0	0	71	145	19	37	2	82	0	208	227	1	106	182	76	117	84	170
YBR007C	109	67	15	13	120	0	30	12	55	0	25	19	107	7	2	0	55	11	0	22	46	71	57	76	51	6	0	9	1	0	0	0	0	23	46	65	43	0	30	0	24	155	0	30	65	17	95	25	105
YBR008C	36	35	31	18	69	0	21	13	103	1	10	27	71	7	10	0	74	23	0	22	24	48	23	79	23	1	0	16	0	0	0	0	0	16	128	71	26	2	51	1	38	51	0	1	111	14	37	12	48
YBR009C	1713	1679	269	172	1154	15	1731	481	1035	79	699	324	2977	217	399	0	1130	1509	2	1055	1450	2005	1198	1754	1233	479	3	204	34	2	0	0	4	474	754	1692	1114	31	408	59	659	1939	13	701	1063	371	1868	1321	2212
YBR010W	1520	1140	185	127	904	10	956	261	280	68	640	202	1879	97	333	13	294	1005	5	522	1224	1624	1098	958	1112	349	6	175	9	8	0	0	4	275	269	1104	789	39	156	97	271	1546	12	546	369	261	1768	782	1503
YBR011C	1756	1276	779	418	3530	15	1677	449	1797	63	767	946	4343	296	609	7	2255	1063	0	1144	1596	2495	1236	2381	1829	410	2	481	26	0	0	3	0	937	2056	3302	2471	69	1029	119	840	1660	0	1332	2229	750	1345	970	1818
YBR012C
YBR013C
YBR014C	52	45	22	21	25	0	41	13	65	2	26	15	80	9	9	0	73	29	0	38	26	92	35	60	46	7	0	5	0	0	0	0	0	16	14	93	57	5	15	3	9	46	4	20	39	26	68	34	42
YBR015C	164	99	36	23	239	0	224	44	87	12	55	39	267	37	29	0	213	176	0	130	172	204	89	195	138	46	0	48	0	0	0	0	0	45	151	335	248	7	123	22	97	220	0	99	118	43	149	88	139
YBR016W	348	218	148	58	384	0	351	107	264	22	118	211	513	37	58	0	551	134	0	188	198	498	153	384	258	59	0	46	1	0	0	0	0	170	370	306	224	11	168	17	197	339	0	127	364	107	177	172	262
YBR017C	63	67	19	15	91	6	110	38	87	5	26	20	255	10	26	0	28	91	0	86	69	132	48	27	47	25	0	28	7	0	0	0	0	28	93	162	214	1	12	2	40	87	0	16	142	16	47	30	80
YBR018C	16	9	5	0	0	0	1	0	46	0	1	2	0	0	0	0	2	2	0	0	5	1	9	0	2	0	0	0	0	0	0	0	0	2	7	5	0	0	0	0	4	15	0	0	1	0	0	2	3
YBR019C	0	0	3	0	0	0	3	0	0	0	0	2	0	0	0	0	8	0	0	0	0	0	6	0	3	0	0	0	0	0	0	0	0	0	15	1	0	0	0	0	0	0	0	0	1	0	0	0	0
YBR020W	18	15	2	0	10	0	2	3	20	0	0	1	16	1	0	0	7	3	0	2	5	21	19	0	2	0	0	0	0	0	0	0	0	3	10	6	19	0	7	0	7	25	0	7	33	0	9	2	19
YBR021W	89	46	1	0	9	0	49	18	15	0	13	1	111	1	0	0	13	30	0	19	22	58	34	31	85	1	0	17	1	0	0	0	0	1	33	58	50	0	48	5	11	48	0	0	30	5	16	15	40
YBR022W	84	68	41	13	187	0	34	31	97	7	36	40	114	16	10	0	81	22	0	59	42	86	42	136	60	25	0	31	0	0	0	0	0	57	94	88	23	1	17	1	64	118	0	62	163	39	86	29	57
YBR023C	134	119	49	24	110	0	172	48	100	38	59	53	306	18	15	0	126	99	0	104	60	134	62	118	131	25	0	40	1	0	0	0	0	59	149	263	216	3	61	11	26	110	0	49	210	38	28	39	74
YBR024W	37	24	29	8	67	0	8	11	61	1	10	20	20	0	16	0	58	6	0	34	27	33	32	25	37	10	0	7	1	0	0	0	0	20	23	19	47	0	8	1	89	33	0	14	24	1	63	14	29
YBR025C	320	325	27	42	128	0	806	258	87	27	83	64	2269	35	76	0	93	658	0	681	289	401	205	203	318	96	0	163	2	0	0	0	0	41	206	1827	1250	4	86	27	75	304	2	147	118	29	264	160	323
YBR026C	260	139	98	41	382	0	114	19	165	4	142	94	231	27	28	0	328	42	0	63	178	212	174	226	271	104	0	33	1	0	0	0	0	75	240	190	232	4	59	14	145	237	0	100	232	55	287	141	181
YBR027C
YBR028C	56	38	10	13	55	0	38	11	39	2	10	16	74	0	18	0	65	15	0	28	45	99	20	46	15	7	0	8	0	0	0	0	0	40	34	86	27	2	0	0	5	73	0	21	38	6	59	11	70
YBR029C	100	174	51	9	182	0	147	44	78	7	53	42	237	18	74	0	195	63	0	77	145	193	64	177	49	35	0	40	1	0	0	0	0	40	69	138	222	2	93	1	22	163	0	89	112	44	82	77	132
YBR030W	40	33	22	26	122	2	92	35	116	4	29	31	150	12	13	6	62	54	0	44	62	80	60	118	46	5	2	27	2	1	2	1	4	29	138	165	112	4	50	9	79	86	3	58	64	46	54	27	54
YBR031W
YBR032W
YBR033W	19	29	9	5	11	0	0	7	34	1	8	12	7	2	3	0	24	0	0	0	16	25	13	25	17	4	0	11	0	0	0	0	0	0	7	1	0	0	0	0	0	12	0	13	0	1	0	5	10
YBR034C	98	67	9	10	176	0	112	87	15	1	7	11	256	7	49	0	107	87	0	105	33	99	56	53	40	8	0	25	0	0	0	0	1	18	81	210	189	2	5	9	36	115	0	87	80	19	53	11	75
YBR035C	309	228	96	82	385	3	216	39	280	11	115	146	399	69	156	0	407	188	0	231	272	414	211	469	363	56	0	54	4	0	0	0	0	116	276	280	256	8	193	13	127	263	0	349	299	88	285	201	213
YBR036C	182	136	24	13	150	2	121	39	50	6	63	42	177	15	31	0	188	88	0	94	121	220	77	50	133	25	0	24	1	0	0	0	0	46	138	183	112	4	55	2	56	196	0	39	116	40	145	47	149
YBR037C	52	34	43	20	169	1	45	10	97	0	33	42	77	15	11	0	63	24	0	36	32	59	36	36	64	18	0	20	0	0	0	0	0	30	72	38	34	4	69	4	70	37	0	26	128	37	69	58	62
YBR038W	130	131	19	15	172	0	92	37	69	1	64	24	283	3	23	0	58	69	0	60	157	181	88	48	108	41	0	27	1	0	0	0	0	44	81	213	152	3	19	0	41	181	0	93	69	25	159	111	114
YBR039W	303	279	146	53	260	0	68	74	46	20	149	91	321	8	53	0	173	110	0	115	82	465	97	119	316	60	0	63	1	2	0	0	0	102	96	238	82	6	70	13	37	332	0	159	126	64	409	212	288
YBR040W	0	0	0	0	0	0	0	0	4	0	1	0	0	0	0	0	0	0	0	0	0	0	0	0	0	0	0	0	0	0	0	0	0	0	0	0	0	0	0	0	0	6	0	0	2	0	0	0	0
YBR041W	45	61	30	10	100	1	92	17	35	4	38	31	204	14	15	0	112	58	0	67	93	84	40	81	49	16	0	17	0	0	0	0	0	26	54	98	72	4	12	16	30	66	0	56	93	23	56	48	47
YBR042C	55	26	18	9	67	2	77	34	25	3	20	30	130	1	9	0	110	60	0	95	68	47	24	32	29	4	0	10	0	0	0	0	0	19	83	86	50	4	26	2	1	41	0	30	47	12	10	28	21
YBR043C	335	251	24	25	178	0	64	9	363	4	226	24	77	39	49	0	127	37	0	47	650	416	279	372	438	106	0	16	4	0	0	0	0	58	195	104	81	3	242	8	107	277	0	113	327	42	286	233	307
YBR044C	28	28	19	7	55	0	35	20	96	0	8	10	65	9	4	0	85	25	0	40	50	66	32	43	28	2	0	11	1	0	0	0	0	24	21	76	109	0	50	0	24	36	0	36	26	16	35	51	16
YBR045C	2	14	4	4	2	0	5	1	53	1	6	8	1	0	2	0	31	5	0	9	6	21	12	5	31	9	0	5	0	0	0	0	0	10	67	13	13	1	16	0	0	15	0	0	32	5	26	16	3
YBR046C	35	46	39	5	133	0	20	4	67	0	51	28	44	25	13	0	89	12	0	19	45	91	51	39	45	2	0	10	0	0	0	0	0	31	44	36	22	3	3	0	22	45	0	58	26	18	59	33	47
YBR047W	55	34	18	26	38	0	23	4	71	5	31	17	36	9	27	0	56	11	0	5	89	72	55	57	56	2	0	9	0	0	0	0	0	7	32	25	7	0	34	5	67	38	0	21	88	11	55	23	31
YBR048W
YBR049C	63	57	9	7	41	0	27	18	26	1	16	4	104	0	3	0	44	20	0	26	58	48	28	26	34	19	0	4	1	0	0	0	0	9	56	42	77	3	8	8	2	73	0	24	54	13	47	22	53
YBR050C	1	12	16	0	0	0	2	0	44	0	1	1	25	0	0	0	10	0	0	0	0	0	2	10	8	0	0	1	0	0	0	0	0	0	16	4	1	0	15	0	22	5	0	0	30	0	1	2	5
YBR051W
YBR052C	328	205	198	72	633	2	154	25	502	15	173	157	424	52	23	0	673	89	0	121	291	426	308	457	319	98	0	31	1	0	0	0	0	161	412	225	139	22	313	27	374	239	0	112	425	140	357	171	265
YBR053C	104	107	100	62	298	5	55	7	382	8	95	92	202	33	17	0	302	36	0	19	214	133	120	364	190	64	0	29	2	0	0	0	0	79	324	100	82	6	121	2	159	147	0	32	361	78	125	105	74
YBR054W	33	11	1	2	0	0	1	0	2	0	2	0	3	1	0	0	28	0	0	1	10	8	13	0	69	11	0	5	0	0	0	0	0	0	1	26	8	0	0	2	0	14	0	0	0	0	21	26	7
YBR055C	40	38	22	9	51	0	40	20	67	0	19	26	135	13	10	0	29	21	0	47	16	69	36	68	58	4	0	7	1	0	0	0	0	13	32	78	85	0	20	8	17	38	0	30	73	6	24	11	54
YBR056W	105	55	98	55	206	1	61	13	226	1	49	71	119	10	9	0	198	29	0	41	103	91	69	109	141	20	0	13	0	0	0	0	0	35	252	29	61	2	115	3	168	79	0	7	154	34	91	46	48
YBR057C	40	43	19	17	58	0	31	5	38	0	16	22	70	5	12	0	100	10	0	36	22	62	44	11	39	7	0	15	8	0	0	0	0	27	74	53	42	1	30	1	3	56	0	12	70	14	34	17	29
YBR058C	121	114	46	20	135	3	208	37	203	28	71	27	336	12	22	3	95	171	0	64	94	173	78	119	104	35	1	47	0	2	1	1	0	47	111	272	202	7	54	41	72	123	1	44	163	32	76	71	117
YBR059C	177	135	67	30	213	1	133	37	190	6	63	82	258	17	36	0	256	71	0	47	166	196	106	148	161	26	0	37	4	0	2	0	0	35	178	225	249	11	77	4	129	139	0	78	227	74	118	63	85
YBR060C	36	30	15	15	19	1	57	21	30	10	25	15	153	3	11	0	67	46	0	30	18	65	33	74	45	1	0	11	0	0	0	0	0	13	40	106	123	0	14	7	69	54	0	2	78	5	59	15	37
YBR061C	85	65	14	11	43	0	83	56	40	17	14	20	245	11	35	0	49	59	0	71	47	149	54	97	50	12	0	33	1	0	0	0	0	14	87	192	105	0	22	13	34	107	0	50	33	0	37	57	98
YBR062C	73	46	32	15	152	0	66	17	79	6	38	28	182	9	11	0	66	54	0	63	94	85	83	81	90	25	1	32	3	0	0	0	0	37	97	149	81	0	43	3	91	70	0	23	61	37	29	54	53
YBR063C	44	55	15	5	33	0	11	14	51	3	10	9	60	2	2	0	54	30	0	27	12	54	44	26	40	1	0	13	1	0	0	0	0	18	71	62	55	1	23	1	26	73	0	29	82	4	64	25	40
YBR064W
YBR065C	4	3	4	0	0	0	1	3	13	0	4	0	5	0	0	0	3	0	0	0	0	15	7	3	1	0	0	0	0	0	0	0	0	3	9	6	0	0	0	0	0	6	0	1	15	0	3	7	8
YBR066C	84	56	71	29	169	0	41	49	43	11	75	43	82	7	9	0	34	17	0	48	133	112	113	22	103	38	0	10	5	0	0	0	0	67	37	77	89	1	11	11	35	93	0	25	57	37	82	77	54
YBR067C	166	98	1	6	16	6	369	67	46	37	10	3	469	15	5	0	47	246	0	227	20	401	128	36	96	14	0	11	1	0	0	0	0	10	22	323	322	1	13	15	48	153	0	9	45	1	65	50	206
YBR068C	356	274	1	5	47	3	445	160	109	56	35	21	875	42	39	0	68	300	0	580	88	353	194	140	307	12	0	126	10	0	0	0	0	13	68	821	945	5	53	28	57	296	0	163	56	3	63	48	167
YBR069C	17	29	1	3	23	0	240	39	66	16	0	8	791	8	0	0	9	145	0	97	0	33	20	33	15	0	0	55	0	0	0	0	0	19	9	561	331	3	29	2	2	3	0	55	10	0	2	20	8
YBR070C	48	27	19	24	72	0	64	13	53	1	17	26	127	4	7	0	109	42	0	10	41	64	27	112	26	21	0	21	0	0	0	0	0	34	52	66	55	4	31	1	12	61	0	16	89	18	54	34	33
YBR071W	29	25	15	22	105	0	28	11	39	0	35	24	97	2	8	0	89	26	0	81	30	31	7	11	32	23	0	16	1	0	0	0	0	19	39	24	59	3	2	0	0	91	0	0	32	11	43	6	21
YBR072W	283	118	11	10	43	2	14	1	85	0	43	8	24	8	2	0	32	14	0	40	17	93	243	49	1482	37	0	4	1	0	0	0	0	32	40	44	12	5	60	0	105	122	0	0	36	29	115	34	54
YBR073W	17	30	12	3	25	1	43	3	78	4	22	12	62	2	2	0	31	13	0	19	40	23	16	67	39	4	0	8	0	0	0	0	0	14	41	49	37	1	41	0	4	17	0	8	42	13	24	12	29
YBR074W	68	46	7	8	29	0	61	14	88	5	30	13	179	2	11	0	48	42	0	73	43	71	68	59	52	30	0	23	1	0	0	0	0	10	49	154	72	2	38	9	11	59	0	31	80	5	30	22	63
YBR076W	0	3	3	0	0	0	0	0	0	0	0	3	3	0	0	0	0	0	0	0	0	1	7	0	8	0	0	0	0	0	0	0	0	0	0	0	7	0	0	0	0	3	0	0	16	6	0	0	0
YBR077C	43	55	62	27	224	0	38	13	172	7	37	64	119	16	7	0	153	40	0	50	72	69	51	98	66	10	0	13	0	0	0	0	0	41	157	77	73	1	39	2	92	56	0	29	230	46	144	34	55
YBR078W	838	596	152	67	780	4	823	251	371	29	325	202	1934	86	169	3	633	475	0	466	609	1040	418	755	616	167	0	319	16	0	0	0	0	239	522	1632	1182	11	455	56	173	1094	1	508	616	162	1082	243	864
YBR079C	203	175	26	20	116	0	444	180	166	22	61	49	1237	43	86	0	187	450	0	313	175	273	106	302	149	26	0	130	5	0	1	0	0	62	234	906	1001	5	87	29	71	209	0	237	190	35	214	105	181
YBR080C	80	69	46	27	241	0	72	41	181	16	43	37	319	25	13	0	231	66	0	52	87	166	96	123	103	12	0	32	1	0	0	0	0	67	275	174	141	5	77	18	80	127	0	70	190	31	85	51	82
YBR081C	32	33	15	1	54	0	48	11	107	5	30	19	184	4	10	2	34	28	0	22	52	92	61	43	81	6	0	13	1	0	0	0	0	5	67	134	112	0	22	2	79	59	0	57	81	13	35	20	54
YBR082C	855	568	216	101	836	6	1306	445	464	39	309	334	3147	128	242	3	575	1007	2	640	759	1074	553	793	923	155	0	395	7	0	0	1	0	243	565	2432	1564	26	371	105	260	758	0	421	672	166	953	480	738
YBR083W	44	26	17	17	56	0	14	22	63	0	7	19	86	2	1	0	36	23	0	27	23	51	27	34	20	14	0	14	0	0	0	0	0	10	58	54	30	1	32	0	31	48	0	11	47	2	99	5	56
YBR084W	110	103	9	7	49	0	406	150	27	24	39	21	983	15	39	0	119	302	0	231	82	158	52	82	78	14	0	82	1	0	0	0	0	4	158	730	520	3	28	29	18	134	0	94	119	27	88	48	123
YBR085W	7	2	0	0	5	0	14	3	12	0	0	3	32	0	0	0	10	7	0	4	0	6	1	0	1	1	0	0	5	0	0	0	0	1	10	31	15	0	8	0	1	8	0	0	3	3	14	4	3
YBR086C	208	198	68	26	257	0	220	61	96	9	68	66	491	38	51	0	280	101	0	150	175	243	118	233	183	65	0	40	4	0	0	0	0	71	233	513	284	2	59	14	67	286	0	115	147	43	130	110	227
YBR087W	50	40	17	2	80	0	50	32	52	1	34	25	156	7	7	0	63	58	0	55	81	79	28	103	48	20	0	33	2	0	0	0	0	30	66	121	137	1	39	1	0	90	0	51	60	18	58	46	45
YBR088C	142	118	59	41	332	1	391	76	100	16	92	97	538	20	45	0	181	178	0	169	208	150	91	292	154	36	1	71	0	0	1	0	0	100	188	339	236	3	110	44	70	175	0	137	149	67	392	119	75
YBR089W
YBR090C	5	2	4	1	9	0	2	0	24	0	0	3	0	0	0	0	14	3	0	13	0	0	3	14	1	0	0	2	0	0	0	0	0	8	26	2	6	0	0	0	23	0	0	0	22	5	1	0	4
YBR091C	17	23	17	8	74	0	86	47	83	6	20	25	173	2	20	0	38	39	0	59	32	31	32	43	39	2	0	17	0	0	0	2	0	13	59	117	51	1	23	5	27	49	0	28	39	21	59	30	11
YBR092C	43	33	4	11	54	2	277	84	16	15	8	17	360	8	29	0	19	152	0	199	21	55	17	65	29	9	0	102	1	0	0	0	0	10	22	731	642	5	23	41	32	36	0	81	41	9	50	40	21
YBR093C	42	25	13	5	34	0	79	2	101	3	1	13	154	11	4	0	71	56	0	9	5	44	19	128	45	0	0	1	1	0	0	0	0	5	96	1198	87	1	52	4	68	37	0	7	104	11	40	4	31
YBR094W	58	47	18	4	56	0	71	35	123	10	23	19	183	4	12	0	66	45	0	47	36	77	42	69	59	13	0	25	0	0	0	0	0	13	103	100	92	2	13	6	38	56	0	24	133	21	91	32	87
YBR095C	40	45	5	1	63	0	54	10	72	5	17	29	87	1	10	0	71	24	0	7	43	62	28	90	49	10	0	5	0	0	0	0	0	13	69	71	69	1	9	3	56	30	0	5	40	18	38	17	82
YBR096W	76	105	113	61	166	0	276	74	274	16	84	103	678	32	45	0	100	152	0	153	255	190	149	274	192	79	0	72	1	0	0	0	0	104	265	386	319	10	66	7	99	99	0	105	297	62	186	115	63
YBR097W	52	28	13	8	70	0	27	6	26	4	26	12	22	3	11	0	41	15	0	6	37	73	20	13	37	24	0	9	0	0	0	0	0	6	22	27	29	0	8	0	38	49	0	47	82	21	69	24	46
YBR098W	16	19	6	3	11	0	16	3	52	0	11	5	33	1	4	0	8	11	0	19	24	24	28	68	26	13	0	5	0	0	0	0	0	13	42	78	37	0	4	0	39	22	0	10	13	8	25	8	20
YBR099C
YBR101C	114	81	22	17	69	1	190	43	172	5	49	20	350	5	21	1	77	114	2	87	118	130	56	87	116	31	0	47	0	0	0	1	0	28	92	245	205	0	265	18	41	96	1	30	73	24	82	50	129
YBR102C	87	43	19	17	66	0	51	11	94	9	23	40	88	10	17	0	42	38	0	21	20	78	50	42	44	17	0	18	0	0	0	0	0	12	76	57	56	1	19	1	30	58	0	19	104	12	50	34	58
YBR103W	90	73	35	22	142	3	44	22	95	0	44	32	91	11	18	0	23	22	0	52	75	106	55	101	73	5	0	17	0	0	0	0	0	23	73	72	45	1	26	2	27	84	0	41	184	30	88	46	78
YBR104W	102	88	15	3	50	6	113	53	182	8	34	17	278	25	71	0	119	71	0	115	131	215	139	298	108	20	0	32	6	0	0	0	0	15	64	193	154	2	66	2	17	141	0	151	154	23	80	37	88
YBR105C	277	257	36	21	124	4	55	25	255	7	62	57	84	24	53	0	385	38	0	23	156	460	213	238	151	36	0	36	1	0	0	0	0	34	301	67	50	4	93	9	247	374	0	51	245	22	245	38	240
YBR106W	430	385	62	46	361	2	644	284	192	40	170	96	1726	43	118	1	353	540	0	469	536	597	342	467	380	119	0	159	8	0	0	1	0	98	135	1343	822	12	146	26	117	444	5	338	231	98	411	273	337
YBR107C	15	5	8	2	51	0	1	0	38	0	7	4	17	0	2	0	4	3	0	4	22	9	2	1	12	3	0	2	0	0	0	0	0	13	39	26	22	0	9	0	14	16	0	0	34	3	1	5	6
YBR108W	91	94	41	24	172	0	72	13	79	0	52	36	148	22	10	0	135	16	0	83	111	129	88	63	73	19	0	8	2	0	0	0	0	42	137	85	67	4	35	12	80	92	0	58	83	28	22	57	80
YBR109C	798	615	310	140	1242	6	922	309	666	22	485	384	1824	114	273	1	837	645	0	876	801	1094	549	775	873	222	0	278	1	0	0	0	0	327	723	1200	901	17	474	15	398	669	3	561	876	265	733	400	652
YBR110W	47	41	25	9	92	0	50	13	99	4	13	16	174	4	12	0	75	55	0	40	47	66	20	27	35	7	0	26	0	0	0	0	0	35	124	130	127	0	27	4	35	48	0	35	85	8	79	25	46
YBR111C	225	142	117	69	509	2	233	35	306	7	86	111	535	43	41	0	333	141	0	231	192	268	257	276	388	72	0	72	4	0	0	0	0	104	238	442	346	4	119	6	127	224	0	137	272	66	138	176	167
YBR112C	174	149	32	13	177	1	148	51	106	5	64	16	270	25	29	0	141	128	0	119	107	225	124	144	110	49	0	19	0	0	0	0	0	35	145	211	158	4	39	10	48	231	0	108	94	27	92	53	175
YBR113W
YBR114W	127	78	40	10	61	0	41	34	126	9	53	25	67	9	27	0	121	18	0	21	18	174	85	52	81	19	0	21	0	0	0	0	0	26	201	42	58	2	36	2	62	116	0	36	161	8	81	37	118
YBR115C	264	259	146	100	801	2	116	51	202	7	216	214	285	73	522	0	169	54	0	186	564	415	199	587	327	105	0	137	2	0	0	0	0	249	255	180	260	11	66	7	58	275	0	1059	343	167	638	325	262
YBR116C
YBR117C	28	23	1	0	0	0	6	1	15	0	14	0	24	4	0	0	17	1	0	5	20	19	43	8	56	21	0	0	1	0	0	0	0	0	12	2	0	0	4	0	62	18	0	0	24	7	3	20	4
YBR118W	421	336	63	63	271	10	1024	278	162	99	170	87	1270	57	143	16	110	772	0	341	284	561	289	302	335	94	0	128	2	1	0	5	0	112	193	862	680	8	127	82	26	485	1	279	198	91	285	297	418
YBR119W	47	39	18	9	20	0	34	6	23	0	16	16	92	2	8	0	29	27	0	35	48	46	38	45	37	18	0	9	0	0	0	0	0	14	33	42	39	2	29	7	23	33	0	24	20	12	20	34	40
YBR120C	50	67	50	15	107	0	39	23	56	3	21	19	96	7	19	0	47	20	0	37	67	35	23	27	88	19	0	21	0	0	0	0	0	50	67	107	99	4	20	8	10	55	0	45	71	44	70	32	38
YBR121C	385	291	27	25	307	1	973	285	195	35	123	82	1931	66	165	11	188	606	0	574	273	594	275	418	349	52	0	207	1	0	0	8	0	38	175	1846	1271	16	172	42	155	397	0	572	285	58	325	160	312
YBR122C	94	99	73	33	328	0	142	48	293	6	42	63	415	36	31	0	237	127	0	188	176	143	119	232	171	38	0	72	0	0	0	0	0	118	255	219	263	1	196	4	145	102	0	145	342	84	185	154	91
YBR123C	46	58	10	3	98	0	34	5	85	0	33	18	130	3	5	0	73	24	0	12	8	45	34	57	35	7	0	6	3	0	0	0	0	12	65	79	121	0	13	0	24	30	0	53	58	20	99	13	51
YBR124W
YBR125C	26	25	13	14	47	0	27	17	90	1	10	12	87	0	5	0	102	31	0	18	61	50	36	10	23	11	0	12	0	0	0	0	0	11	54	45	60	2	11	1	12	30	0	11	85	13	52	20	32
YBR126C	295	277	260	112	637	5	170	37	647	13	227	177	277	46	42	0	960	52	0	100	405	380	317	389	534	119	0	63	3	0	0	0	0	246	677	288	218	11	203	11	702	349	0	90	743	132	366	263	161
YBR127C	650	514	136	54	399	0	618	95	469	30	226	137	721	43	100	2	589	321	1	272	450	944	221	380	365	128	1	72	1	1	4	0	0	148	356	503	429	24	198	45	247	635	0	163	342	124	446	389	680
YBR128C	8	18	17	1	44	1	15	2	83	0	16	9	3	4	0	0	17	8	0	4	22	10	38	7	60	4	0	5	1	0	0	0	0	12	47	10	12	0	26	0	30	25	1	0	69	7	23	20	8
YBR129C	21	12	8	2	21	0	28	3	35	0	10	18	55	8	4	7	62	15	0	20	20	37	25	18	9	10	2	0	0	0	0	0	0	10	55	23	19	0	17	2	0	20	0	8	16	15	53	21	31
YBR130C	27	47	40	14	138	0	108	46	64	18	29	27	300	27	25	1	40	89	0	29	71	104	34	125	45	13	0	38	0	0	0	0	0	37	121	213	143	0	35	9	65	77	0	20	160	35	92	41	60
YBR131W	58	94	49	15	99	2	30	15	228	0	27	39	37	27	6	0	179	14	0	32	60	79	69	73	70	21	0	8	0	0	0	0	0	33	192	51	26	1	61	0	67	84	0	9	197	21	35	31	54
YBR132C	28	54	8	9	48	1	1	2	62	1	28	13	12	4	2	2	72	3	0	2	27	54	9	11	27	1	1	2	1	0	0	0	0	10	13	9	13	0	8	0	64	34	0	0	69	4	24	36	38
YBR133C	53	72	39	5	124	1	98	23	84	4	51	26	121	12	14	0	116	45	0	54	110	87	47	116	54	17	0	30	3	0	0	0	0	51	96	150	97	2	35	3	76	87	0	75	128	38	140	54	50
YBR134W
YBR135W	116	147	53	24	170	2	280	72	211	13	48	84	496	12	36	0	132	186	0	222	85	191	86	187	160	44	0	56	0	0	0	0	0	49	222	492	273	1	132	36	77	194	0	122	185	51	136	126	125
YBR136W	64	51	6	4	68	1	25	6	74	10	18	12	92	14	12	0	54	24	0	56	43	43	64	64	73	16	0	12	0	0	0	0	0	22	50	109	106	2	19	1	20	64	0	26	73	6	42	19	63
YBR137W	102	78	34	34	270	0	68	12	147	10	59	64	151	23	28	0	130	23	0	37	188	172	79	159	110	16	0	8	1	0	0	0	0	53	134	124	97	3	13	4	150	87	0	36	88	24	111	68	97
YBR138C	41	49	23	17	35	0	9	7	72	7	20	16	24	0	5	0	16	14	0	13	59	48	50	46	35	21	0	4	0	0	0	0	0	13	56	16	14	5	11	3	5	41	0	11	47	22	78	19	36
YBR139W	480	443	126	88	620	9	81	18	378	6	296	120	134	27	43	0	451	33	0	58	451	588	391	365	587	167	0	22	1	0	0	0	0	92	550	163	129	8	182	0	310	444	0	92	518	119	511	267	408
YBR140C	180	124	62	28	188	3	70	32	53	5	114	33	199	16	20	0	164	106	0	106	168	255	139	98	212	22	0	16	4	0	0	0	0	48	173	207	106	6	21	1	84	213	0	69	103	22	163	69	208
YBR141C	11	20	2	1	2	0	26	21	32	7	0	4	127	0	9	0	13	8	0	21	2	21	16	27	8	0	0	12	0	0	0	0	0	0	14	72	68	0	3	0	18	31	0	6	32	0	0	7	29
YBR142W	88	91	4	3	16	0	174	128	37	5	10	8	336	8	28	0	57	128	0	140	64	170	69	113	53	13	0	27	0	0	0	0	0	7	45	271	228	4	29	4	0	128	0	54	77	15	29	31	103
YBR143C	261	182	18	25	136	3	561	123	135	21	74	52	1108	33	106	1	190	410	0	448	168	452	199	350	206	61	0	102	4	0	0	1	0	44	224	772	624	3	96	18	54	320	0	224	205	53	204	85	253
YBR144C
YBR145W	131	76	8	10	42	1	15	2	19	5	44	11	23	21	52	0	65	9	0	55	74	140	74	259	127	5	0	15	0	0	0	0	0	6	20	78	18	7	45	15	10	64	0	172	39	17	43	26	48
YBR146W	64	49	33	24	148	1	38	18	50	3	48	27	232	9	17	0	72	42	0	32	38	81	42	58	72	9	0	48	1	0	0	0	0	24	48	145	86	1	13	1	53	72	0	123	87	22	81	35	47
YBR147W	137	141	38	35	173	1	2	0	203	5	81	46	3	30	33	0	127	5	0	6	223	150	95	208	169	30	0	3	7	0	0	0	0	27	247	1	3	2	39	0	85	127	0	129	138	30	89	62	58
YBR148W	24	4	4	3	12	0	6	5	27	0	20	11	4	0	3	0	30	3	0	5	28	25	15	10	24	18	0	4	0	0	0	0	0	1	38	6	1	1	21	0	24	44	0	13	19	1	0	17	15
YBR149W	409	370	282	154	1415	6	182	54	710	12	243	257	660	75	42	1	1000	109	0	159	546	490	357	660	491	143	1	79	3	0	0	0	0	292	809	302	393	14	503	11	555	362	0	84	892	234	397	297	320
YBR150C	49	41	15	10	29	0	27	12	29	0	13	10	85	1	12	0	37	21	0	9	36	49	54	28	98	23	0	10	1	0	0	0	0	21	29	67	29	1	33	0	1	68	0	38	33	15	28	23	45
YBR151W	72	80	60	17	207	0	148	44	122	3	61	62	294	11	39	0	212	69	0	110	98	78	51	78	105	39	0	25	0	0	0	0	0	70	134	186	116	2	55	13	80	57	0	73	104	21	73	46	47
YBR152W	0	0	0	0	0	0	1	1	0	0	0	2	0	0	2	0	0	0	0	0	0	0	0	7	0	0	0	0	0	0	0	0	0	1	0	0	0	0	0	0	0	2	0	0	1	0	0	0	0
YBR153W	29	58	8	13	34	0	30	27	46	2	26	16	104	6	15	0	50	23	0	20	24	79	50	58	20	2	0	8	0	0	0	0	0	17	48	96	40	0	4	3	0	46	1	7	83	19	67	30	28
YBR154C	215	194	24	18	151	1	419	215	245	20	54	69	933	28	91	0	170	276	0	269	162	354	78	265	165	43	0	126	1	0	0	0	0	44	116	698	544	4	99	20	98	169	2	237	176	39	237	72	201
YBR155W	60	58	10	5	40	0	155	86	268	3	19	13	354	9	22	0	47	65	0	119	52	96	46	94	50	5	0	38	0	0	0	0	0	9	43	371	228	5	18	3	15	104	0	22	47	15	105	14	108
YBR156C	37	22	1	4	42	0	16	11	21	0	8	2	53	2	2	0	25	17	0	47	25	29	17	12	14	6	0	9	0	0	0	0	0	25	19	24	21	0	0	0	3	32	0	17	25	6	37	24	24
YBR157C	5	2	2	0	0	0	5	0	17	0	0	2	4	0	0	0	14	0	0	3	6	6	4	4	12	0	0	0	0	0	0	0	0	4	14	10	0	0	0	0	0	3	0	0	13	1	0	0	14
YBR158W	163	94	18	8	128	0	198	17	137	4	33	17	308	10	15	0	151	18	0	104	76	322	132	156	148	16	0	21	0	0	0	0	0	27	69	296	192	4	58	15	103	241	0	16	220	17	49	47	195
YBR159W	292	199	88	33	358	3	353	89	188	6	122	121	706	20	51	4	141	258	0	199	284	334	197	280	298	70	0	70	6	0	0	0	0	119	213	546	401	5	150	33	96	255	3	140	216	77	229	207	210
YBR160W	43	61	48	31	206	3	81	40	172	4	23	38	212	10	15	0	91	54	0	71	91	65	32	120	75	16	0	46	0	0	0	0	0	31	143	109	172	4	44	0	30	67	0	51	98	34	96	49	48
YBR161W	70	69	14	12	27	0	43	12	22	0	37	12	136	0	12	4	33	21	0	19	94	103	50	29	36	18	0	4	0	0	0	0	0	12	48	57	51	1	55	4	10	99	0	20	92	14	63	47	61
YBR162C	647	509	99	84	458	4	493	123	368	69	141	127	980	70	90	4	717	239	2	433	407	907	371	503	391	86	6	96	4	6	3	5	2	126	313	854	446	16	203	45	157	819	6	276	387	126	586	198	629
YBR163W	29	26	17	4	143	0	36	7	66	3	12	18	61	6	9	0	82	15	0	49	30	57	39	21	17	14	0	7	0	0	0	0	0	24	43	42	39	0	28	1	10	65	0	20	31	6	15	14	56
YBR164C	99	74	55	16	159	1	186	58	148	10	40	69	422	9	46	0	200	140	0	178	160	124	46	156	83	14	0	45	0	0	0	0	0	27	142	250	154	0	60	2	49	118	0	96	157	37	69	57	97
YBR165W	32	28	15	10	28	1	30	8	68	0	6	14	62	0	4	0	6	20	0	6	29	39	29	15	15	3	0	3	0	0	0	0	0	18	45	39	32	0	34	0	2	43	0	34	26	4	48	23	20
YBR166C	63	34	28	15	73	0	34	19	73	2	25	13	129	8	20	0	32	42	0	33	108	53	34	106	41	28	0	32	0	0	0	0	0	13	52	111	75	2	51	4	35	66	0	67	106	32	28	29	67
YBR167C	33	36	21	11	58	0	61	14	30	1	18	11	97	8	20	0	80	31	0	65	26	29	38	47	20	6	0	13	0	0	0	1	0	36	76	69	87	2	36	1	32	18	0	26	111	10	31	18	22
YBR168W	22	49	17	15	147	2	26	6	113	4	18	24	105	8	5	0	48	25	0	11	9	85	53	47	13	14	0	5	0	0	0	0	0	10	36	36	39	2	26	4	72	50	0	46	95	7	38	33	35
YBR169C	124	83	31	26	50	1	50	5	205	4	55	31	55	13	12	0	152	32	0	25	65	101	73	94	241	34	0	12	0	0	0	0	0	48	108	90	33	5	61	7	143	100	0	68	71	16	74	38	53
YBR170C	41	39	25	7	121	0	21	9	106	0	16	14	102	1	8	0	80	16	0	6	33	42	24	69	39	1	0	9	0	0	0	0	0	34	108	51	55	0	18	0	50	30	0	1	124	24	33	20	16
YBR171W	114	102	54	16	113	4	219	74	97	3	49	36	448	15	35	0	115	133	0	115	127	121	36	117	99	14	0	53	0	0	0	0	0	60	51	340	221	3	25	13	70	77	0	44	153	35	35	49	110
YBR172C	86	67	4	1	18	0	116	51	28	2	13	8	152	11	36	0	44	67	0	91	29	126	27	76	55	7	0	22	0	0	0	1	0	15	55	136	139	2	26	10	30	84	0	57	67	19	29	22	57
YBR173C	140	106	92	29	324	1	299	78	210	13	67	99	557	18	63	1	372	195	0	340	161	159	118	239	124	28	0	84	3	0	0	0	0	84	195	364	311	5	123	12	197	129	0	120	226	77	66	95	141
YBR174C
YBR175W	50	17	10	9	44	0	38	6	84	1	5	15	91	5	1	0	22	37	0	58	20	31	12	80	23	1	0	9	0	0	0	0	0	14	42	83	52	1	56	0	59	18	0	10	40	13	12	14	32
YBR176W	41	20	4	1	19	2	21	10	33	2	14	12	100	2	13	0	38	38	0	41	27	52	32	55	37	5	0	20	1	0	0	0	0	7	25	76	72	0	22	0	12	39	0	14	2	7	20	20	31
YBR177C	114	79	84	48	377	0	59	11	58	0	63	82	156	2	50	0	240	54	0	51	123	167	38	131	114	24	0	9	0	0	0	0	0	112	61	82	58	2	66	6	111	99	0	158	143	66	93	76	108
YBR178W
YBR179C	20	26	23	27	71	0	26	10	41	6	8	7	45	0	3	0	16	17	0	23	6	66	28	29	52	10	0	5	0	0	0	0	0	7	27	47	46	1	12	0	34	37	0	31	45	6	2	21	58
YBR180W	2	2	2	3	0	0	2	4	5	0	0	0	13	1	2	0	0	8	0	7	0	3	3	6	2	1	0	1	0	0	0	0	0	1	1	7	11	0	1	0	0	2	0	0	15	0	0	2	8
YBR181C
YBR182C	0	0	1	0	9	0	0	0	14	0	1	1	7	0	0	0	21	0	0	6	0	0	4	7	8	3	0	1	0	0	0	0	0	1	6	14	9	0	0	0	20	2	0	11	12	0	0	6	9
YBR183W	17	29	30	8	97	2	1	0	16	1	7	15	12	0	3	0	15	2	0	0	7	14	16	4	24	7	0	0	0	0	0	0	0	18	14	0	0	0	22	0	35	13	0	2	12	3	6	22	19
YBR184W	15	5	9	6	12	0	0	4	0	0	3	2	20	0	0	0	13	3	0	7	5	5	3	3	12	9	0	0	0	0	0	0	0	6	4	9	16	0	0	3	0	2	0	7	28	2	17	7	5
YBR185C	49	47	25	13	106	1	32	15	35	1	15	13	102	8	7	0	54	39	0	50	19	31	22	77	24	2	0	14	0	0	0	0	0	28	35	52	47	0	9	8	47	22	0	24	60	13	110	28	28
YBR186W	0	0	0	0	0	0	0	0	0	0	0	0	0	0	0	0	7	0	0	0	0	0	0	10	0	0	0	0	0	0	0	0	0	0	0	0	0	0	0	0	0	0	0	0	9	0	0	0	0
YBR187W	129	132	33	19	185	0	232	54	69	8	75	40	397	11	47	0	210	227	0	182	71	197	74	66	72	38	0	65	6	0	0	0	0	44	54	249	213	0	22	17	37	153	0	60	153	30	89	76	137
YBR188C	34	21	14	12	41	0	36	14	32	8	10	17	75	0	6	0	16	27	0	22	8	42	23	72	65	19	0	8	0	0	0	0	0	11	69	80	48	0	16	2	46	20	0	9	69	7	38	25	27
YBR189W	2	0	0	0	3	0	35	4	13	0	7	1	195	0	3	0	3	13	0	22	13	2	5	8	6	0	0	9	0	0	0	0	0	1	3	129	85	0	0	0	0	5	0	10	2	0	16	1	5
YBR190W
YBR191W	699	428	36	42	366	3	2173	466	331	105	254	108	5894	60	387	3	253	1792	4	1293	697	993	487	593	767	138	1	504	4	1	8	8	8	138	402	3423	3012	28	224	145	59	655	10	909	321	89	714	335	591
YBR192W	17	31	5	8	62	1	81	25	80	1	9	18	154	7	10	0	42	37	0	70	42	73	32	68	40	8	0	18	0	0	0	0	0	13	48	107	60	3	23	8	12	63	0	32	43	24	37	26	42
YBR193C	10	18	14	8	33	0	14	6	33	7	7	13	69	4	2	0	43	7	0	30	14	34	11	28	15	3	0	7	0	0	0	0	0	7	22	49	15	1	33	0	36	28	0	10	35	2	2	5	11
YBR194W	33	26	30	16	53	1	37	22	53	1	5	14	27	6	11	0	68	19	0	23	9	34	17	45	32	24	0	14	0	0	0	0	0	20	60	29	64	2	36	2	58	35	0	37	66	21	41	18	38
YBR195C	25	28	11	9	55	0	55	25	56	6	13	10	136	6	17	0	44	34	0	44	51	85	68	87	26	12	0	13	0	0	0	0	0	15	119	86	73	0	22	1	91	61	0	41	81	9	35	22	65
YBR196C	1488	1116	299	214	1504	31	2951	670	955	272	458	425	4968	271	422	2	1060	1996	0	1772	1081	1930	1038	1610	1622	211	0	563	18	0	1	6	2	432	1227	4900	2908	46	658	303	699	1343	3	1043	887	348	1040	581	1507
YBR197C	1	0	2	0	0	0	5	0	8	0	1	0	6	0	0	0	12	0	0	1	0	4	3	2	3	0	0	2	0	0	0	0	0	0	3	11	1	0	0	0	1	1	0	12	3	0	0	2	0
YBR198C	31	52	20	9	89	0	74	15	78	3	36	16	198	3	16	0	57	72	0	78	41	82	52	92	61	11	0	25	1	0	0	0	0	7	98	240	119	0	64	2	24	63	0	60	75	6	52	53	65
YBR199W	202	157	84	57	380	2	197	58	396	17	85	109	535	38	37	0	305	155	0	111	309	267	138	220	335	59	0	74	0	0	0	0	0	99	386	491	366	5	135	21	194	146	0	128	442	66	233	151	176
YBR200W	31	35	18	13	35	0	47	12	51	0	14	23	84	5	3	0	128	46	0	32	29	82	46	51	31	7	0	3	0	0	0	0	0	30	51	65	37	0	40	2	31	44	0	10	64	19	19	22	42
YBR201W	25	32	17	10	34	0	42	8	40	1	28	20	52	9	2	0	52	19	0	33	22	64	52	28	44	8	0	12	0	0	0	0	0	13	43	90	49	1	22	1	39	28	0	55	66	10	13	11	41
YBR202W	95	79	15	34	87	2	65	20	29	1	26	34	106	1	13	0	76	28	0	47	109	109	37	84	47	12	0	16	0	0	0	0	0	20	48	130	70	2	34	3	14	86	0	23	103	16	59	28	60
YBR203W	60	43	9	4	6	0	4	5	12	0	12	12	15	0	6	0	8	9	0	9	3	107	13	7	16	8	0	0	0	0	0	0	0	2	31	0	4	0	19	0	24	96	0	0	20	1	1	14	62
YBR204C	56	28	42	15	135	0	40	9	34	0	13	42	29	4	5	0	125	28	0	13	71	83	42	17	50	27	0	11	1	0	0	0	0	28	91	71	22	6	10	4	72	42	0	2	79	13	31	21	65
YBR205W	89	78	27	30	143	1	201	47	104	11	39	42	666	31	40	0	151	111	0	105	77	110	99	143	97	16	0	66	1	0	0	0	0	34	121	516	360	3	94	16	51	82	0	90	173	7	142	50	86
YBR206W
YBR207W	144	166	78	33	198	3	108	77	222	10	80	77	269	13	39	0	160	46	0	125	152	294	130	134	184	32	0	28	1	0	0	0	0	84	96	191	133	0	82	3	67	145	4	117	157	60	149	93	166
YBR208C	590	433	68	69	517	6	64	15	491	5	1434	103	88	21	17	0	443	41	0	161	402	655	296	377	3424	190	0	16	6	0	0	0	0	137	493	221	119	5	188	4	170	611	0	85	600	94	788	372	496
YBR209W
YBR210W	103	130	42	19	94	0	160	28	151	3	58	61	215	15	26	1	86	94	1	102	87	150	109	42	133	18	0	26	2	0	2	1	0	44	141	128	124	3	78	6	32	120	3	43	131	23	62	76	107
YBR211C	43	60	30	11	86	4	59	23	126	8	26	26	103	0	19	2	13	70	1	11	40	97	50	45	96	15	0	16	0	2	1	0	2	33	68	80	82	5	52	8	35	89	3	39	79	16	56	56	48
YBR212W	156	97	31	65	247	2	59	24	209	2	31	36	118	20	23	0	120	29	0	70	91	227	85	102	115	20	0	11	0	0	0	0	0	56	140	151	122	2	13	4	89	168	0	61	142	54	80	49	171
YBR213W	43	38	220	153	684	0	41	11	54	3	25	157	47	5	20	0	213	27	0	16	61	51	39	144	42	15	0	4	0	0	0	0	0	173	590	34	66	0	49	0	494	30	2	66	735	150	39	18	51
YBR214W	123	102	47	31	121	4	46	9	223	6	72	11	75	12	2	0	115	47	0	30	145	141	96	65	153	61	0	13	0	0	0	0	0	41	169	43	50	5	45	8	174	138	0	20	170	21	122	103	88
YBR215W	28	27	10	7	8	0	49	9	31	4	7	2	53	5	6	0	55	24	0	71	2	45	20	45	33	7	0	10	0	0	0	0	0	20	42	78	53	1	10	2	16	62	0	26	35	2	21	14	35
YBR216C	45	23	23	4	139	0	16	8	41	6	9	21	43	6	11	0	70	16	0	19	14	56	23	61	45	21	0	3	0	0	0	0	0	15	74	61	19	0	22	0	41	53	0	28	68	22	32	20	54
YBR217W	18	21	11	3	37	0	22	8	52	1	9	16	15	5	10	0	38	6	0	38	22	42	5	38	16	5	0	1	0	0	0	0	0	13	42	23	31	5	17	4	12	21	0	15	35	15	54	4	19
YBR218C	246	242	71	54	299	5	145	37	191	12	66	50	284	34	175	0	227	96	0	271	107	354	112	282	206	22	0	55	4	0	1	0	0	96	290	236	154	5	89	6	111	252	0	367	181	53	206	109	217
YBR219C
YBR220C	30	25	17	25	144	0	72	37	146	1	35	21	177	9	9	0	77	34	0	68	82	93	72	81	72	4	0	25	0	0	0	0	0	35	175	198	92	4	15	12	54	84	1	61	95	14	77	20	37
YBR221C	579	442	158	91	676	6	772	168	447	25	279	192	1526	87	142	0	654	399	2	658	669	950	437	696	566	147	2	129	4	0	0	0	0	243	597	1083	839	15	342	33	304	604	0	320	475	129	497	311	596
YBR222C	87	55	65	56	347	1	131	37	138	10	28	61	205	2	39	0	205	45	0	46	132	148	99	92	121	25	0	21	1	0	0	0	0	75	163	152	145	1	16	1	131	109	1	83	134	42	118	56	87
YBR223C	7	13	9	6	31	0	6	1	29	5	11	4	17	0	4	0	42	5	0	0	2	2	4	12	10	0	0	0	0	0	0	0	0	0	17	22	0	0	0	0	11	8	0	0	8	4	18	3	4
YBR224W
YBR225W	18	17	6	4	4	3	12	9	1	0	6	12	16	0	10	0	35	10	0	20	40	48	7	0	9	5	0	1	0	0	0	0	0	3	18	13	22	0	15	0	26	31	0	4	7	12	20	20	19
YBR226C
YBR227C	80	97	23	17	94	0	71	35	44	1	71	32	153	13	25	0	68	71	0	100	64	139	60	86	57	25	0	31	0	0	0	0	0	21	83	158	111	4	67	16	31	121	0	46	158	23	69	52	89
YBR228W	21	32	14	7	23	0	5	9	58	0	21	12	22	2	9	0	36	1	0	47	18	41	24	34	21	9	0	6	0	0	0	0	0	9	54	31	11	2	21	5	11	12	0	3	71	7	14	5	28
YBR229C	60	52	31	13	87	1	89	14	70	6	17	28	155	5	14	0	147	59	0	47	53	90	32	85	70	17	0	11	1	0	0	0	0	38	64	70	103	4	12	2	45	103	0	37	72	29	87	27	57
YBR230C	424	428	263	73	476	4	218	16	381	6	180	219	453	70	50	0	672	88	0	127	330	480	458	214	546	119	0	60	4	0	0	0	0	175	406	301	196	7	236	2	371	384	0	73	497	68	378	263	328
YBR231C	43	34	13	9	109	2	38	15	108	1	30	13	92	1	3	0	69	25	0	46	95	37	49	69	41	11	0	21	0	0	0	0	0	27	60	92	65	0	9	0	20	34	0	16	111	16	20	23	30
YBR232C
YBR233W	53	34	24	3	114	0	42	17	40	0	7	29	55	0	11	0	48	17	0	63	50	65	33	45	73	3	0	14	1	0	0	0	0	19	35	112	35	1	16	0	28	55	0	31	77	20	19	19	64
YBR234C	232	209	74	62	468	0	253	51	271	7	166	115	596	77	55	0	373	160	0	137	271	421	191	336	308	55	0	82	2	0	0	0	0	124	325	387	281	3	194	4	199	270	0	165	369	96	313	136	263
YBR235W	258	262	74	66	358	2	99	24	382	4	156	74	240	26	36	1	382	56	0	60	273	344	218	346	327	99	0	28	3	0	0	0	0	87	372	247	145	1	171	4	228	275	0	127	404	82	208	173	329
YBR236C	63	78	55	20	104	0	59	38	139	2	29	54	132	9	13	0	116	51	0	72	41	89	50	95	55	6	0	19	0	0	0	0	0	29	39	139	105	1	60	5	61	66	2	24	149	36	41	63	36
YBR237W	28	34	14	4	24	2	20	6	45	2	13	16	39	0	8	0	63	10	0	12	15	27	15	28	35	4	0	2	0	0	0	0	0	8	55	64	25	0	16	2	23	33	0	21	69	3	49	10	18
YBR238C	1	0	0	0	0	0	0	2	16	0	0	1	5	0	0	0	0	0	0	0	0	5	0	0	2	0	0	1	0	0	0	0	0	0	4	10	1	0	0	0	0	6	0	2	0	1	0	0	18
YBR239C	10	13	3	0	8	0	9	9	12	1	5	1	19	6	5	0	14	16	0	7	27	26	6	1	11	1	0	2	0	0	0	0	0	0	1	9	6	0	0	0	6	21	0	24	0	5	10	8	19
YBR240C	19	10	0	0	0	0	0	2	0	0	4	0	0	0	0	0	5	0	0	16	13	21	6	3	25	5	0	2	1	0	0	0	0	7	0	3	5	0	0	0	17	0	0	10	8	1	0	4	22
YBR241C	102	89	27	31	104	1	30	1	104	4	79	34	53	13	7	0	155	7	0	6	137	144	111	57	179	70	0	16	0	0	0	0	0	30	163	50	47	4	23	2	98	130	0	0	104	18	50	83	107
YBR242W	31	24	14	16	88	2	62	46	45	2	21	22	158	18	26	0	51	64	0	68	24	35	40	33	35	16	0	39	0	0	0	0	0	18	36	197	79	0	12	7	28	52	0	45	37	18	68	31	27
YBR243C	54	39	19	10	143	0	91	39	47	6	16	36	334	14	22	0	97	66	0	119	53	76	54	91	50	17	0	31	4	0	0	0	0	32	124	221	132	3	30	4	33	87	1	65	48	28	118	48	46
YBR244W	99	100	41	11	77	0	236	95	72	35	37	51	508	15	8	0	97	99	0	241	149	95	47	89	81	7	0	42	0	0	0	0	0	48	128	339	255	3	46	12	47	84	0	126	103	28	60	51	87
YBR245C	109	51	15	14	44	0	109	34	55	8	38	51	171	7	9	0	104	85	0	91	42	93	55	78	43	10	0	22	1	0	0	0	0	34	106	155	150	2	58	2	56	70	0	46	60	25	34	48	54
YBR246W	84	78	38	17	123	0	97	36	134	4	35	42	217	7	23	0	132	70	0	48	71	105	69	168	74	22	0	26	0	0	0	0	0	60	149	197	87	3	71	2	83	74	0	65	88	30	52	37	101
YBR247C	102	68	10	0	59	0	193	72	16	10	11	9	485	8	14	0	39	120	0	116	39	96	33	155	49	9	0	53	1	0	0	4	0	6	49	402	297	5	11	12	1	48	0	47	73	4	30	24	88
YBR248C	363	302	35	31	203	4	178	57	231	4	111	63	518	67	146	0	287	180	0	230	343	473	212	651	373	59	0	78	6	0	0	0	0	55	402	378	363	5	144	17	68	346	0	296	383	41	208	148	397
YBR249C	446	425	81	75	334	2	507	162	221	25	154	82	1604	164	330	19	115	304	0	516	627	738	286	628	565	84	1	240	4	8	5	0	5	100	266	1151	1085	15	225	34	121	429	3	850	301	73	437	251	477
YBR250W	10	8	4	0	0	0	6	0	2	0	0	0	2	0	0	0	1	2	0	3	0	3	4	0	0	0	0	0	0	0	0	0	0	0	0	0	0	0	0	0	30	7	0	0	9	2	5	1	7
YBR251W	63	64	24	20	124	0	85	33	45	0	27	22	167	10	28	0	70	30	0	53	36	69	53	51	69	21	0	33	0	0	0	0	0	36	74	118	68	0	56	0	45	55	0	77	82	28	152	21	67
YBR252W	138	132	36	46	175	1	250	98	218	33	65	55	840	17	55	0	146	288	0	197	229	167	104	351	147	43	0	79	7	0	0	0	0	56	174	581	439	6	145	15	85	128	0	130	201	57	172	141	131
YBR253W	71	59	46	16	131	0	130	28	145	6	49	45	114	3	27	0	126	53	0	76	73	155	72	125	52	20	0	28	0	0	1	0	2	34	180	132	96	0	70	8	54	87	0	39	91	31	52	40	63
YBR254C	43	16	15	4	69	0	43	12	27	0	24	11	46	2	8	0	31	16	0	52	33	47	18	24	21	1	0	6	0	0	0	0	0	16	32	66	45	0	20	5	11	38	1	6	51	3	34	24	32
YBR255W	34	47	14	13	29	0	33	13	46	1	18	18	76	3	5	0	76	7	0	26	26	49	46	63	59	10	0	9	1	0	0	0	0	15	74	21	80	1	5	0	54	27	0	13	65	12	53	29	30
YBR256C	265	270	287	86	495	0	103	22	795	0	159	165	244	32	229	0	403	80	0	279	383	338	213	594	363	24	0	81	2	0	0	0	0	155	485	178	202	8	283	2	288	255	0	373	536	157	343	170	209
YBR257W	54	63	16	16	103	0	74	20	73	2	24	15	166	15	20	0	49	67	0	44	27	58	54	62	41	18	0	10	1	0	0	0	0	14	110	117	91	0	55	0	37	47	0	29	98	6	34	15	35
YBR258C	19	17	16	4	33	0	29	13	60	0	11	4	67	1	5	0	56	7	0	21	21	25	15	27	18	6	0	11	0	0	0	0	0	7	22	33	13	0	30	1	49	13	0	28	75	16	1	19	9
YBR259W	31	12	4	2	23	0	13	5	27	1	1	4	44	0	1	0	10	9	0	20	29	26	14	19	15	2	0	0	0	0	0	0	0	9	15	17	23	2	4	0	31	16	0	0	5	3	26	18	10
YBR260C	29	38	24	21	71	0	43	31	70	4	19	25	67	13	5	0	50	8	0	27	43	42	30	57	31	12	0	7	0	1	0	0	0	23	120	70	71	1	15	4	50	50	0	9	112	19	45	22	29
YBR261C	51	45	10	3	67	1	87	37	48	2	23	30	218	4	23	0	47	63	0	74	38	75	36	102	30	20	0	14	1	0	0	2	0	25	62	202	163	3	21	5	17	43	1	37	39	10	55	17	53
YBR262C	146	116	86	54	319	1	126	43	221	10	108	90	350	15	82	0	114	119	0	192	144	208	144	216	176	37	0	46	1	0	0	0	0	71	154	243	250	4	113	14	134	116	0	177	196	70	200	106	162
YBR263W	126	116	32	23	39	1	196	69	83	13	36	48	374	24	46	1	65	154	0	244	77	200	60	117	104	25	0	49	1	0	0	0	0	21	116	367	235	3	77	10	76	145	0	85	134	16	118	103	131
YBR264C	111	58	46	37	172	0	62	23	139	6	48	31	200	11	11	0	140	57	0	31	46	87	56	89	60	13	0	8	0	0	0	2	0	67	124	123	84	5	55	8	92	32	1	19	192	20	78	44	77
YBR265W	109	92	38	23	86	0	103	37	102	3	52	31	250	18	12	0	114	56	0	40	124	178	79	156	78	41	0	30	0	0	0	0	0	14	84	230	125	3	66	3	63	177	0	76	195	36	106	74	114
YBR266C
YBR267W	70	66	9	2	30	0	189	79	37	11	7	11	333	11	23	0	84	84	0	127	51	144	35	60	44	9	0	39	0	0	0	0	0	8	50	284	173	4	11	13	8	96	0	34	64	18	51	25	54
YBR268W	53	46	31	24	174	0	130	48	128	4	40	27	303	3	30	0	112	89	0	131	60	90	63	116	62	21	0	30	0	0	0	0	0	48	52	130	175	2	30	6	39	76	1	42	96	36	89	34	42
YBR269C	276	198	116	40	326	6	69	21	201	10	120	76	193	25	36	0	258	80	0	60	272	261	123	213	315	69	0	37	2	0	0	0	0	92	374	156	114	1	129	14	218	194	0	51	249	58	175	109	198
YBR270C	28	23	3	3	48	2	7	3	39	4	11	12	37	2	3	0	29	11	0	1	42	42	24	23	31	7	0	5	0	0	0	0	0	13	36	18	6	4	7	1	28	33	0	0	77	3	17	9	28
YBR271W	62	27	5	3	13	0	58	14	18	1	14	17	183	3	8	0	47	45	0	42	12	65	30	49	30	4	0	21	0	0	0	0	0	2	11	153	102	0	14	0	12	31	0	21	35	7	36	3	16
YBR272C	44	55	31	8	139	4	26	10	129	5	14	32	87	5	16	0	205	20	0	42	91	38	31	22	28	17	0	13	0	0	0	0	0	28	74	45	59	3	19	0	98	58	0	23	171	32	43	21	32
YBR273C	35	23	25	2	54	7	43	13	34	0	11	14	61	0	17	0	77	17	0	28	34	25	23	57	21	5	5	7	1	0	0	0	0	25	47	46	45	1	8	10	18	26	0	16	25	9	36	11	49
YBR274W	43	33	25	12	62	0	40	15	86	4	22	19	88	9	8	0	76	42	0	26	83	62	34	64	53	19	0	7	0	0	0	0	0	19	38	64	52	6	8	10	24	45	0	2	100	10	18	22	41
YBR275C	60	55	3	11	25	1	38	10	20	7	15	15	49	1	6	0	19	29	0	41	13	53	39	40	21	7	0	10	2	0	0	0	0	18	40	66	37	1	9	3	4	99	1	7	28	6	35	13	32
YBR276C	67	75	51	23	162	2	122	42	173	3	31	62	202	21	21	1	81	90	0	78	102	103	56	144	109	20	0	37	0	0	0	0	0	34	110	324	196	2	67	7	84	96	0	89	200	40	72	58	90
YBR277C
YBR278W	78	49	34	19	180	0	56	26	142	8	39	24	194	8	7	0	155	62	0	37	69	63	87	71	92	25	0	20	0	0	0	0	0	36	148	155	85	1	57	3	51	91	0	55	211	35	78	65	46
YBR279W	81	78	37	21	120	0	71	27	56	19	25	40	219	6	24	0	66	67	0	73	144	114	64	71	60	14	0	15	0	0	0	0	0	36	64	212	44	8	47	4	16	112	0	63	116	19	85	34	81
YBR280C	23	18	27	7	28	0	2	3	62	0	15	18	17	4	4	0	41	4	0	17	17	33	21	12	18	12	0	6	0	0	0	0	0	11	64	16	10	1	9	1	34	47	0	18	30	19	12	17	16
YBR281C	81	52	65	46	483	0	40	12	644	5	33	75	223	14	9	0	123	82	0	35	51	76	36	78	49	8	0	33	1	0	0	0	0	74	296	84	84	4	48	15	48	41	0	24	298	69	34	41	81
YBR282W	78	42	49	16	175	0	94	49	104	2	63	44	169	6	33	0	84	58	0	60	13	84	51	50	70	39	0	24	0	0	0	0	0	41	48	65	135	5	27	1	23	51	0	75	45	22	64	32	44
YBR283C	292	204	68	36	248	3	503	132	265	20	102	84	1010	55	59	0	265	302	4	177	226	317	204	324	206	93	2	94	3	0	1	0	4	88	241	789	636	11	100	27	130	250	5	123	292	62	157	135	246
YBR284W	2	5	3	0	4	0	1	0	20	0	2	0	4	0	0	0	0	3	0	13	3	1	5	7	6	0	0	0	0	0	0	0	0	3	9	0	4	0	6	0	8	2	0	2	8	3	11	6	5
YBR285W	78	97	28	15	88	3	13	0	104	0	43	24	6	29	5	0	63	0	0	11	125	75	71	39	138	55	0	0	1	0	0	0	0	23	84	7	0	0	140	1	21	94	0	10	27	8	16	63	63
YBR286W	585	459	180	148	597	2	628	122	259	72	325	270	744	115	109	0	1022	394	0	357	487	1005	394	468	401	174	0	106	9	0	1	0	0	270	477	863	578	22	282	98	331	626	0	199	528	203	495	349	650
YBR287W	261	168	88	30	297	0	63	26	287	3	157	121	125	2	26	0	431	42	0	63	224	322	108	137	204	63	0	16	15	1	0	0	0	65	228	64	85	1	134	6	195	226	0	42	214	67	143	111	291
YBR288C	81	49	66	17	115	0	84	28	181	6	36	37	242	19	14	0	147	86	0	63	42	124	104	150	101	19	0	23	4	0	0	0	0	54	116	179	166	2	77	4	74	95	0	17	179	21	80	31	101
YBR289W	96	83	19	2	60	0	55	30	50	14	44	19	147	8	22	0	65	56	0	66	48	124	80	68	75	36	0	16	1	0	0	0	0	28	49	137	194	2	63	4	18	99	0	97	64	5	71	46	91
YBR290W	64	26	30	10	94	0	67	41	85	0	26	26	182	15	16	0	118	64	0	53	62	66	35	39	69	21	0	20	1	0	0	0	0	20	95	112	78	4	40	1	39	85	0	28	102	9	80	43	52
YBR291C	134	93	145	103	663	0	69	11	341	5	81	157	217	15	145	0	168	40	0	8	194	248	123	217	150	75	0	16	2	0	1	0	0	184	378	128	125	0	97	2	92	166	0	240	415	125	236	154	175
YBR292C
YBR293W	61	28	142	92	393	0	15	0	485	0	17	103	62	0	5	0	146	1	0	9	30	57	33	79	22	6	0	2	0	0	0	0	0	76	139	32	17	3	14	0	90	24	0	22	239	59	50	21	34
YBR294W	583	453	745	288	3002	5	5	13	80	10	133	581	7	58	129	0	1382	8	0	4	429	787	188	742	308	49	0	10	3	1	5	0	0	540	857	0	0	16	328	8	418	527	1	235	1137	395	106	246	587
YBR295W	44	22	28	13	31	0	7	8	76	0	29	3	13	3	3	0	14	9	0	11	2	83	8	49	46	6	0	4	0	0	0	0	0	13	34	11	13	1	25	3	0	46	0	4	72	4	25	9	61
YBR296C	105	75	3	0	4	0	10	1	88	2	1	2	20	2	7	0	62	21	0	16	15	101	21	52	50	1	0	0	0	0	0	0	0	4	69	169	20	4	89	3	20	124	0	0	98	0	0	2	182
YBR297W	17	16	37	3	39	0	6	6	71	0	39	9	40	5	2	0	40	9	0	12	28	18	32	13	33	0	0	11	0	0	0	0	0	15	37	43	23	0	39	0	40	15	0	11	39	6	29	16	22
YBR298C	31	13	52	21	39	0	5	0	16	2	16	9	3	2	0	0	30	4	0	13	22	13	18	13	21	4	0	4	0	0	0	0	0	11	37	8	6	3	23	6	23	23	0	0	24	1	26	2	29
YBR299W
YBR300C
YBR301W
YBR302C	4	0	2	0	2	0	0	1	0	0	0	0	3	0	0	0	1	0	0	7	0	0	1	8	6	4	0	1	0	0	0	0	0	0	4	4	5	0	0	0	6	0	0	0	4	1	0	0	1
YCL001W	348	358	129	78	457	0	365	106	383	13	124	130	810	37	71	0	462	325	0	348	377	359	242	247	385	85	0	75	12	0	0	1	0	105	435	469	425	8	223	34	151	326	1	105	293	127	420	232	226
YCL002C	49	48	19	12	82	0	46	18	25	0	6	12	65	1	13	0	79	34	0	66	23	21	14	44	21	5	0	7	0	0	0	0	0	18	98	63	26	0	6	1	35	18	0	0	62	7	63	12	26
YCL004W	18	7	8	4	16	0	19	9	18	0	13	15	33	0	2	0	11	7	0	4	10	28	8	39	21	5	0	0	0	0	0	0	0	2	39	4	19	1	21	0	53	15	0	4	36	0	29	10	13
YCL005W	54	65	20	15	113	3	42	16	98	7	17	30	157	6	15	0	27	42	0	78	33	73	41	55	33	14	0	20	2	0	0	0	0	28	129	98	83	1	46	3	30	85	0	32	80	28	19	52	70
YCL007C
YCL008C	58	84	45	28	140	1	63	31	241	0	50	22	200	15	17	0	125	42	0	124	95	85	66	106	70	16	0	11	1	0	0	0	0	27	246	120	143	3	65	2	134	60	0	83	254	50	72	37	78
YCL009C	1005	1229	277	176	955	8	695	139	648	73	452	285	1445	253	406	0	812	535	0	905	938	1485	731	1195	968	198	0	294	7	0	0	0	0	228	1097	950	864	8	324	81	271	991	0	1089	847	244	864	503	1036
YCL010C	10	24	11	3	8	0	10	7	66	5	0	6	27	8	2	0	47	22	0	33	0	30	0	74	11	4	0	0	0	0	0	0	0	5	68	28	37	1	45	2	21	28	0	3	48	10	15	11	19
YCL011C	93	126	48	24	201	2	199	67	166	3	42	32	473	28	50	0	176	164	0	201	116	125	64	164	101	29	0	47	1	0	0	0	0	59	362	329	280	4	74	3	88	106	0	75	191	37	165	57	99
YCL014W	23	57	10	3	24	0	30	10	12	1	6	8	56	0	7	0	28	34	0	48	29	61	20	4	36	12	0	0	0	0	0	0	0	10	20	93	50	3	7	2	12	41	0	50	15	2	36	33	52
YCL016C	23	43	20	14	62	0	32	5	52	1	11	17	82	4	13	0	63	15	0	18	35	47	10	56	25	0	0	5	0	0	0	0	0	11	92	47	34	2	15	4	51	24	0	19	120	14	27	16	27
YCL017C	139	97	26	13	127	1	78	14	49	1	44	16	212	1	24	0	120	62	0	92	116	138	60	79	89	35	0	17	0	0	0	0	0	27	108	149	104	5	17	5	61	116	0	89	99	17	44	78	165
YCL018W	1	5	4	1	23	0	5	1	0	2	0	0	0	0	0	0	0	4	0	11	0	1	2	0	1	0	0	0	0	0	2	0	0	0	8	5	0	0	0	7	20	16	0	0	0	1	0	0	0
YCL019W
YCL020W
YCL022C
YCL023C
YCL024W	22	6	7	8	30	0	38	5	11	2	1	8	57	3	3	0	45	12	0	7	23	24	25	18	29	6	0	2	0	0	0	0	0	12	22	24	25	0	6	3	1	4	0	27	2	3	53	10	22
YCL025C	774	539	235	157	1030	2	79	16	1124	12	371	268	80	124	142	0	1081	62	0	97	819	1036	494	1099	744	178	0	4	5	1	0	0	0	266	1632	86	64	16	283	25	250	605	0	370	1362	208	877	663	657
YCL027W	6	2	11	0	0	0	2	1	8	0	0	2	4	4	2	0	22	0	0	9	9	18	1	2	1	0	0	1	2	0	0	0	0	1	36	0	2	0	0	0	0	3	0	9	7	0	0	5	4
YCL028W	70	52	15	12	72	2	123	18	66	14	38	21	298	8	12	0	105	86	0	96	85	94	34	112	75	36	0	33	0	0	0	0	0	30	161	172	146	8	24	33	34	63	0	14	131	12	82	48	85
YCL029C	85	59	26	17	98	0	63	41	78	7	32	35	146	11	7	0	58	54	0	37	49	107	25	116	62	11	0	11	0	0	0	0	2	32	194	127	113	3	20	1	35	78	0	53	99	22	58	44	98
YCL030C	1922	1583	247	206	916	32	888	77	1382	97	596	178	1594	389	979	0	725	627	1	1291	1654	2187	1260	3149	2211	190	0	254	22	1	0	0	0	336	2095	1317	1238	62	442	85	199	1624	3	2504	1439	268	1021	722	1400
YCL031C	134	97	23	31	130	0	217	84	73	8	38	45	276	9	30	0	100	182	0	197	72	188	87	107	83	17	0	38	1	0	0	0	0	43	209	204	199	3	25	14	44	176	0	63	103	35	83	50	145
YCL032W	74	31	32	38	125	0	48	13	161	4	41	30	118	6	11	0	91	32	0	61	88	94	62	73	73	6	0	14	2	0	0	0	0	26	162	105	86	3	62	21	68	99	0	43	207	13	67	53	70
YCL033C	178	147	90	56	289	3	136	25	272	6	131	88	274	32	37	0	255	80	0	186	199	241	183	195	370	61	0	38	1	0	0	0	0	91	317	201	171	7	91	12	103	171	0	93	243	73	150	131	145
YCL034W	256	211	162	40	490	7	191	53	409	6	145	167	254	24	44	0	455	103	0	101	253	242	198	251	239	68	0	45	1	0	0	0	0	149	358	224	207	2	171	2	250	269	0	91	347	103	228	142	207
YCL035C	527	521	303	112	868	6	357	74	429	22	403	296	688	88	129	0	1110	275	0	262	536	670	474	721	875	176	0	75	8	0	0	0	0	261	823	504	381	7	489	11	523	599	0	150	465	200	485	407	303
YCL036W	66	33	19	5	14	0	105	37	22	4	15	11	230	2	12	0	85	52	0	89	2	90	43	89	25	13	0	41	0	0	0	0	0	2	41	134	132	0	2	3	13	50	4	17	21	3	15	14	42
YCL037C	35	46	16	3	30	0	53	26	11	18	2	7	150	6	9	8	12	46	2	54	19	105	13	16	9	7	1	15	0	1	3	0	1	5	42	92	29	2	21	9	2	88	0	4	19	4	26	20	37
YCL038C	43	25	34	0	14	1	5	4	24	3	20	17	15	0	2	0	81	0	0	15	13	36	25	20	24	0	0	2	0	0	0	0	0	8	19	17	8	0	2	0	54	16	0	11	15	1	36	14	27
YCL039W	47	54	36	15	91	0	30	15	110	1	31	24	40	6	8	0	108	27	0	16	103	50	69	53	64	24	0	6	1	0	0	0	0	37	134	70	37	0	52	0	115	59	0	27	112	24	89	45	59
YCL040W	1252	1049	665	353	2528	22	256	33	2528	34	802	409	782	291	61	0	1516	152	0	312	1385	1332	1452	1228	1991	435	0	161	10	0	0	0	0	766	2709	1354	461	27	1742	32	2085	1031	0	376	2058	601	1748	622	676
YCL041C
YCL042W
YCL043C	426	320	149	99	907	7	801	206	267	107	189	189	1964	109	108	1	645	593	0	997	341	501	283	724	505	114	1	167	4	0	0	0	0	257	793	1767	926	43	254	218	89	424	2	401	491	279	237	247	501
YCL044C	85	77	18	15	85	0	121	25	62	1	31	28	137	14	24	0	123	57	0	92	91	123	57	72	59	15	0	23	1	0	0	0	0	33	88	179	94	2	29	14	38	84	0	34	63	20	51	41	91
YCL045C	126	117	49	23	144	1	217	49	206	14	54	29	530	49	28	0	188	140	0	160	121	224	83	108	101	38	1	40	0	0	0	0	0	47	207	370	385	6	54	12	82	137	0	84	189	10	122	65	124
YCL046W
YCL047C	36	5	20	12	39	0	49	6	22	0	12	8	91	0	12	0	70	7	0	42	12	40	18	4	20	6	0	7	0	0	0	0	0	6	56	48	38	0	8	1	14	36	0	17	61	9	49	8	35
YCL048W	1	0	0	0	1	0	3	5	4	0	0	2	0	0	0	0	0	0	0	5	0	2	0	6	4	0	0	0	0	0	0	0	0	0	6	0	1	4	1	0	8	1	0	0	2	0	0	0	2
YCL049C	14	36	21	5	60	0	19	9	77	0	35	13	28	6	3	0	85	21	0	82	16	43	20	18	57	0	0	18	0	0	0	0	0	12	88	7	24	0	9	0	17	26	0	15	85	18	34	23	28
YCL050C	256	201	27	46	306	0	713	80	158	42	112	69	1287	50	45	0	232	392	0	445	220	379	184	304	222	47	0	116	1	2	0	0	0	68	331	1153	758	12	113	59	27	236	0	165	253	65	312	118	273
YCL051W	55	53	24	3	41	1	55	21	31	1	23	20	84	7	10	0	73	17	0	49	54	72	31	18	44	13	1	12	0	0	0	0	0	29	48	90	84	1	0	0	22	47	0	45	51	4	58	27	50
YCL052C	59	70	65	34	204	0	51	46	120	0	39	65	79	15	11	0	164	35	0	31	59	118	69	91	58	23	0	17	0	0	0	0	0	36	188	73	44	0	30	1	86	68	0	23	125	45	99	63	42
YCL054W	103	131	3	2	24	1	205	153	30	14	15	25	457	12	54	0	92	165	0	287	101	210	59	129	65	2	0	46	1	0	0	0	0	8	105	369	367	3	18	17	33	220	0	77	83	9	125	53	147
YCL055W	36	22	4	8	18	6	37	8	8	1	0	8	96	0	6	0	24	34	0	21	9	37	16	24	34	5	0	7	0	0	0	0	0	9	37	43	30	0	0	6	13	42	0	30	7	6	26	37	9
YCL056C	83	57	31	13	68	0	41	20	88	1	34	25	118	14	14	0	37	48	0	73	32	92	73	78	74	21	0	11	0	0	0	0	0	24	79	89	53	0	34	8	53	55	0	34	72	8	47	41	52
YCL057W	113	129	79	52	363	0	214	72	204	9	48	85	602	35	47	0	223	154	0	215	113	177	101	343	125	31	0	94	2	0	0	2	0	76	388	409	331	4	144	17	134	136	0	80	255	73	102	58	156
YCL058C
YCL059C	114	115	7	5	89	2	317	86	65	22	25	17	714	11	41	0	30	226	0	257	47	219	108	220	91	24	0	69	0	0	0	0	0	21	138	662	481	2	28	3	3	139	0	69	140	0	120	73	151
YCL061C	48	31	25	4	68	5	83	20	13	0	5	18	113	9	12	0	82	48	0	24	36	51	28	15	24	3	0	9	0	0	0	0	0	22	70	69	72	0	18	8	50	67	0	3	19	9	79	31	51
YCL063W	45	34	3	14	1	0	51	15	2	0	12	5	60	8	13	0	16	4	0	47	45	18	13	18	17	5	0	5	0	0	0	0	0	16	13	49	38	0	0	0	8	50	0	14	23	4	51	19	18
YCL064C	82	45	10	5	17	0	367	94	41	26	150	19	1134	5	15	0	58	339	0	120	112	70	79	28	73	49	0	54	0	0	0	1	0	10	63	613	777	3	18	19	0	53	0	42	82	20	107	82	76
YCL065W
YCL066W	0	0	0	0	0	0	0	0	0	0	0	0	0	0	0	0	0	0	0	0	0	0	0	0	0	0	0	0	0	0	0	0	0	0	1	0	0	0	0	0	0	0	0	0	0	0	0	0	0
YCL067C	0	0	0	0	0	0	0	0	0	0	0	0	0	0	0	0	0	0	0	0	0	0	0	0	0	0	0	0	0	0	0	0	0	0	0	0	0	0	0	0	0	0	0	0	0	0	0	0	0
YCL068C	0	0	0	0	0	0	0	0	0	0	0	0	0	0	0	0	0	0	0	0	0	0	0	0	0	0	0	0	0	0	0	0	0	0	0	0	0	0	0	0	0	0	0	0	0	0	0	2	0
YCL069W	0	0	0	0	0	0	0	0	0	0	0	0	0	0	0	0	0	0	0	0	0	0	0	0	0	0	0	0	0	0	0	0	0	0	0	0	0	0	0	0	0	0	0	0	0	0	0	0	0
YCL074W
YCL075W
YCL076W
YCR001W
YCR002C	145	191	68	33	372	2	161	46	174	3	92	73	392	41	33	0	292	76	0	65	206	223	136	277	184	58	0	34	2	0	0	0	0	93	344	334	172	4	120	4	91	129	0	62	200	70	178	114	177
YCR003W	50	46	47	4	103	0	87	29	41	1	25	32	116	3	22	0	84	53	0	82	20	85	47	67	42	8	0	33	0	0	0	0	0	24	95	99	68	4	35	1	29	47	0	59	108	12	62	48	29
YCR004C	445	465	221	72	639	8	321	61	331	30	209	242	558	81	102	0	771	149	0	275	363	682	317	380	296	132	0	44	1	0	0	0	0	291	881	380	258	9	276	37	341	423	2	235	369	174	416	211	384
YCR005C	573	929	50	18	431	0	25	16	191	16	74	72	77	29	10	0	354	32	0	62	564	855	484	153	153	39	0	13	1	0	0	0	0	87	117	157	51	8	338	18	176	801	1	55	106	69	192	223	982
YCR006C
YCR007C	32	51	33	6	105	0	8	4	60	0	17	14	19	1	3	0	79	7	0	26	34	18	17	55	26	8	0	3	0	0	0	0	0	27	132	17	10	1	4	2	78	15	0	16	92	5	5	6	18
YCR008W	137	160	56	24	142	2	163	53	163	17	57	46	341	27	16	0	98	114	0	133	76	137	43	79	129	35	0	33	4	0	0	0	0	54	100	262	235	5	131	16	31	171	0	24	151	33	97	59	153
YCR009C	81	112	47	30	336	2	105	25	70	5	79	47	262	9	23	0	282	68	0	173	129	164	96	150	93	27	0	28	2	0	0	0	0	104	161	103	97	0	35	8	76	132	0	41	99	67	173	43	78
YCR010C	7	4	0	0	33	0	0	1	3	0	0	0	0	0	1	0	3	1	0	0	0	6	7	5	3	2	0	1	0	0	0	0	0	2	6	0	0	0	0	0	0	12	0	0	0	5	0	5	5
YCR011C	116	187	55	45	362	1	83	9	234	3	90	63	274	20	9	0	377	46	0	109	134	213	181	203	148	41	0	19	0	0	0	0	0	53	367	288	200	3	66	15	87	140	0	47	255	58	157	97	150
YCR012W	1794	1932	470	290	1944	14	2939	634	603	380	539	629	5100	223	468	10	1055	2154	0	1909	1611	2621	1334	1189	2220	300	1	638	18	1	9	5	4	715	1378	4430	3227	78	460	506	358	1944	8	1219	842	513	1244	905	2200
YCR013C
YCR014C	135	155	29	0	25	0	89	52	59	1	41	31	99	12	23	0	53	67	0	142	31	174	75	83	71	15	0	5	2	0	0	0	0	12	82	83	88	5	46	1	23	182	0	35	37	19	48	46	123
YCR015C	19	4	6	6	39	0	11	6	46	0	13	10	26	2	6	0	2	7	0	15	34	10	19	47	26	1	0	5	0	0	0	0	0	15	23	9	25	0	11	0	16	23	0	0	18	9	25	2	13
YCR016W	83	75	6	10	41	0	161	55	30	11	10	19	283	14	21	0	43	102	0	87	43	127	69	120	46	11	0	26	0	0	0	0	0	3	56	241	157	1	40	6	14	82	0	31	84	7	50	29	50
YCR017C	122	133	50	27	212	7	233	46	149	11	96	39	490	17	21	0	203	76	0	231	147	159	78	197	107	16	0	35	0	0	0	0	0	59	222	443	279	5	63	24	118	137	0	57	150	48	57	78	142
YCR018C
YCR019W	28	31	25	7	92	0	17	8	126	3	4	17	66	3	8	0	10	7	0	55	30	27	16	14	45	5	0	12	0	0	0	0	0	12	69	62	26	1	10	0	35	37	0	64	53	15	47	26	45
YCR020C	36	16	8	10	50	0	10	1	111	2	49	17	28	0	5	0	50	13	0	33	32	47	41	39	43	2	0	4	0	0	0	0	0	14	109	29	28	0	27	2	21	16	0	27	86	15	30	55	36
YCR021C	3	5	0	4	0	0	5	3	6	0	6	1	30	3	1	1	19	0	0	36	0	2	1	0	124	10	0	0	0	0	0	1	0	7	25	54	2	2	10	0	10	16	0	0	7	3	14	6	4
YCR022C
YCR023C	70	58	27	14	123	1	36	18	93	0	17	24	107	23	22	0	79	31	0	60	49	76	68	118	91	11	0	13	1	0	0	0	0	39	120	74	75	0	36	1	41	59	0	59	130	10	39	51	38
YCR024C	33	41	16	13	64	0	17	7	54	0	28	10	61	6	3	0	32	37	0	12	49	26	37	34	39	8	0	9	12	0	0	0	0	8	56	33	49	0	34	0	48	29	0	26	59	12	32	27	39
YCR025C
YCR026C	100	55	41	12	133	1	97	20	182	8	43	35	241	37	18	0	148	32	0	101	142	112	113	63	145	19	0	31	0	0	0	0	0	46	188	185	121	4	48	0	57	114	0	48	135	23	115	80	61
YCR027C	24	11	10	3	36	0	15	7	34	0	16	9	58	0	6	0	16	20	0	31	20	29	12	59	5	8	0	4	0	0	0	0	0	21	42	42	63	1	19	3	1	10	0	0	26	4	5	5	35
YCR028C	1	10	10	0	37	0	26	6	48	2	0	4	13	2	5	0	26	8	0	15	2	7	3	55	12	1	0	3	0	0	0	0	0	4	49	18	0	2	15	1	12	10	0	0	20	5	29	7	15
YCR030C	118	63	69	20	159	0	78	22	106	5	63	42	229	20	25	0	189	49	0	86	117	114	106	75	156	45	0	22	1	0	0	0	0	61	232	145	194	5	45	0	119	120	0	79	141	49	180	66	104
YCR031C
YCR032W	74	63	22	15	55	0	55	8	59	0	11	16	85	14	4	0	87	39	0	57	59	65	75	55	44	5	0	17	0	0	0	0	0	17	87	65	83	2	26	4	25	53	0	21	145	15	65	53	54
YCR033W	148	106	14	9	83	0	91	19	87	5	44	24	238	18	15	0	62	97	0	93	124	222	113	65	118	40	0	16	0	0	0	0	0	30	85	116	172	1	30	5	14	151	0	36	80	30	181	73	167
YCR034W	102	161	26	22	165	3	328	139	31	33	71	47	767	27	65	0	95	262	0	296	184	184	120	170	112	30	0	105	0	0	0	1	0	40	116	602	449	5	40	15	17	88	0	138	52	44	191	67	131
YCR035C	56	56	24	28	76	0	81	40	94	9	25	32	191	19	29	0	119	65	0	121	47	91	42	65	56	13	0	22	0	0	0	0	0	9	108	218	138	4	17	3	39	87	0	49	121	19	73	35	50
YCR036W	117	94	103	32	246	1	50	28	185	8	45	85	127	6	24	0	170	45	0	86	107	75	71	114	96	28	0	34	1	0	0	0	0	82	307	110	84	1	87	0	123	79	0	43	200	64	67	23	50
YCR037C	60	92	12	13	51	1	60	19	53	5	24	21	124	15	15	0	64	36	0	62	69	81	36	64	47	10	0	23	1	0	0	0	0	17	79	43	104	0	10	1	23	58	0	53	98	11	51	10	73
YCR038C	38	40	10	11	19	0	13	4	24	0	28	12	29	9	5	0	27	0	0	24	46	65	38	5	40	12	0	8	0	0	0	0	0	5	51	44	30	3	29	5	9	71	0	27	22	5	64	18	38
YCR039C	28	44	30	18	46	1	39	17	79	1	4	18	41	2	8	0	5	24	2	19	42	33	21	46	33	12	1	2	0	0	0	2	0	29	70	34	36	1	37	2	45	29	2	3	49	8	34	15	31
YCR040W	1	0	2	0	0	0	0	0	1	0	0	1	0	0	0	0	0	0	0	0	0	1	0	1	0	0	0	0	0	0	0	0	0	0	0	0	0	0	0	0	4	0	0	0	0	0	0	0	0
YCR041W
YCR042C	60	70	18	14	124	0	56	19	116	7	8	16	156	7	13	0	121	31	0	49	38	74	44	131	46	6	0	12	1	0	0	0	0	13	115	125	154	3	47	2	73	82	0	17	75	18	63	26	33
YCR043C	198	212	40	9	149	0	220	55	126	4	52	85	345	7	54	0	227	138	0	149	98	263	105	194	141	37	0	42	1	0	0	0	0	32	213	204	143	5	116	11	25	209	0	86	91	51	144	76	149
YCR044C	18	31	28	7	51	0	36	8	71	0	21	18	57	1	16	0	104	40	0	77	23	34	9	43	23	8	0	10	0	0	0	0	0	26	58	62	35	0	15	2	1	32	3	9	41	18	54	13	35
YCR045C	0	0	3	0	0	0	0	0	9	0	0	0	0	0	0	0	21	0	0	0	0	0	0	9	0	0	0	0	0	0	0	0	0	2	1	0	0	0	0	0	0	0	0	0	10	0	0	0	0
YCR046C	55	16	27	10	91	0	87	43	24	3	28	35	191	4	22	0	76	34	0	86	52	88	27	91	43	11	0	21	0	0	0	0	0	21	69	84	132	5	8	1	101	47	0	78	43	27	106	42	45
YCR047C	161	176	6	3	93	0	202	70	80	4	29	18	339	7	26	0	59	112	0	110	45	277	99	132	87	13	0	44	1	0	0	0	1	5	89	286	196	2	42	9	63	230	0	49	108	14	137	31	157
YCR048W	116	87	49	20	107	3	206	60	188	8	49	63	440	14	33	0	132	133	0	124	130	190	76	165	103	30	0	26	2	0	0	0	0	42	332	321	235	3	80	21	73	132	0	33	263	14	115	81	131
YCR049C
YCR050C
YCR051W	137	90	15	15	97	0	377	112	83	25	67	40	974	22	42	0	105	216	0	287	109	202	95	200	147	39	0	68	0	0	0	0	0	24	179	677	538	0	45	21	15	111	0	97	98	13	111	82	115
YCR052W	109	83	24	19	104	0	100	33	105	14	27	36	277	15	33	0	109	63	0	101	107	96	28	197	82	15	0	34	0	0	0	0	0	25	130	160	118	1	72	12	43	68	0	107	160	39	57	48	83
YCR053W	458	368	59	19	356	14	765	159	282	45	89	66	1680	101	223	4	207	470	0	535	333	711	275	565	511	58	0	179	3	0	0	0	0	73	483	1375	948	20	131	57	93	514	0	503	282	75	292	166	425
YCR054C	62	37	12	5	73	0	94	33	32	3	26	6	85	11	20	0	27	41	0	99	60	68	49	45	22	4	0	17	1	0	0	0	0	7	60	97	71	0	11	5	69	99	0	23	48	4	51	34	84
YCR057C	91	69	9	3	47	1	176	133	39	11	18	17	411	7	24	0	34	95	0	64	29	194	31	154	44	14	0	51	1	0	0	0	0	2	111	329	294	1	37	9	26	96	0	108	51	10	62	33	126
YCR059C	48	30	8	6	15	0	81	28	46	1	8	11	126	13	22	0	35	26	0	61	38	71	38	89	30	5	0	23	0	0	0	0	0	5	79	107	135	0	28	4	27	43	0	18	46	13	28	21	32
YCR060W	92	65	32	11	133	1	163	40	119	2	44	30	355	6	45	1	114	169	0	170	80	109	70	162	95	20	0	48	0	0	0	0	0	33	225	288	238	2	46	21	72	116	0	57	164	21	121	50	60
YCR061W	26	30	12	9	15	0	16	5	24	3	7	15	35	2	2	0	68	10	0	19	11	44	13	5	17	7	0	13	0	0	0	0	0	9	45	62	43	3	20	0	69	44	0	8	5	2	24	25	42
YCR063W	3	2	1	0	0	0	2	0	15	5	0	0	2	3	3	0	0	0	0	20	0	2	0	0	0	0	0	1	0	0	0	0	0	1	10	21	3	0	0	0	0	4	0	5	14	0	11	0	7
YCR064C
YCR065W	59	35	13	8	60	0	37	3	64	3	21	11	48	1	9	0	93	25	0	57	40	71	21	83	51	16	0	16	0	1	0	0	0	16	76	53	48	0	40	0	15	99	0	6	78	19	31	41	57
YCR066W	36	25	15	11	2	1	29	7	29	0	10	3	75	0	11	0	34	21	0	35	20	32	19	16	33	0	0	10	0	0	0	0	0	2	61	39	6	0	3	3	52	19	0	19	26	16	14	17	46
YCR067C	90	94	26	7	104	1	151	24	81	11	19	27	294	24	16	0	104	105	0	86	78	114	81	114	99	14	0	21	0	0	0	0	0	42	138	239	253	3	51	4	49	64	0	52	119	32	104	66	63
YCR068W	1	4	0	0	9	0	0	0	5	0	0	0	0	0	1	0	0	0	0	5	0	0	0	1	0	1	0	1	0	0	0	0	0	0	7	0	0	0	3	0	2	1	0	0	4	0	2	0	0
YCR069W	133	156	53	22	118	1	64	27	93	6	83	61	181	7	24	0	218	69	0	103	134	190	141	62	146	15	0	24	0	0	0	0	0	57	160	199	115	6	21	9	143	139	0	62	109	51	55	73	159
YCR071C	21	9	30	11	122	0	69	30	36	2	34	33	151	1	18	0	70	52	0	98	48	59	26	20	35	11	0	10	1	0	0	0	0	27	71	107	83	1	27	4	27	27	0	54	33	17	67	20	36
YCR072C	75	62	3	3	36	1	134	31	21	20	3	5	207	2	30	0	24	67	0	93	9	151	29	67	34	2	0	18	1	0	0	0	0	0	53	148	119	1	9	11	21	96	0	22	40	8	45	13	80
YCR073C	47	36	19	5	89	0	31	16	170	1	12	7	162	12	12	0	64	25	0	82	77	55	11	55	47	14	1	21	0	0	0	0	0	15	135	80	57	0	58	0	29	35	0	17	116	12	53	16	39
YCR075C	110	102	66	45	278	1	49	9	227	5	90	39	146	39	15	0	129	24	0	79	220	161	129	110	110	59	0	9	0	0	2	0	0	102	294	68	74	1	59	8	79	127	0	67	176	69	198	114	125
YCR076C	46	34	11	22	84	0	57	8	70	1	31	16	104	6	4	0	78	25	0	56	70	56	60	58	57	24	0	9	0	0	0	0	0	25	141	87	47	1	62	0	43	60	0	28	85	35	33	60	39
YCR077C	45	49	23	6	67	0	37	32	24	5	42	32	71	3	10	0	40	32	0	103	51	68	19	57	37	5	0	9	0	0	0	0	0	23	28	20	31	0	2	5	18	104	0	8	38	11	67	43	60
YCR079W	33	22	7	13	73	0	12	0	35	0	27	11	12	0	8	0	26	11	0	17	15	60	17	10	36	6	0	6	0	0	0	0	0	15	10	16	23	1	21	0	57	29	0	0	13	7	54	13	20
YCR081W	0	0	0	0	5	0	0	0	0	0	0	0	6	0	0	0	0	0	0	2	0	0	0	0	0	0	0	0	0	0	0	0	0	1	0	0	0	0	0	0	0	0	0	0	0	0	0	0	0
YCR082W	96	100	80	31	297	0	266	84	181	11	69	84	735	20	35	0	276	156	0	232	101	178	134	217	166	28	0	41	1	0	0	0	0	68	385	282	281	3	107	7	113	125	0	49	212	32	55	69	116
YCR083W	71	71	55	18	91	1	64	24	43	15	50	56	97	3	11	1	68	36	0	94	95	125	56	20	162	16	0	11	1	0	0	0	0	33	125	79	47	0	19	23	70	89	0	7	74	12	29	51	69
YCR084C	132	104	26	25	151	0	138	38	42	13	60	48	279	2	25	0	126	71	0	175	94	237	53	113	98	3	0	31	0	0	0	1	0	52	80	244	163	2	61	4	40	139	0	38	37	12	82	60	122
YCR085W
YCR086W	36	43	12	5	78	0	23	18	35	0	6	19	59	12	6	0	24	16	0	40	12	60	31	63	43	4	0	17	0	0	0	0	0	15	107	72	49	0	18	7	12	56	0	21	66	17	48	18	35
YCR087W
YCR088W	239	209	150	91	822	8	306	42	250	15	126	134	830	80	78	0	443	237	0	277	327	339	247	485	320	72	0	73	2	0	0	0	0	259	622	729	509	15	274	9	222	291	0	178	507	147	321	163	274
YCR089W	10	15	15	7	25	0	28	9	21	0	3	10	29	4	5	0	27	28	0	39	21	34	23	45	22	0	0	6	0	0	0	0	0	7	34	59	48	2	9	0	8	24	0	25	41	10	25	9	13
YCR090C	73	63	21	14	70	3	55	24	71	2	10	42	257	8	29	0	64	86	0	100	65	71	69	86	48	23	0	13	0	0	0	0	0	33	136	176	113	1	23	3	49	69	0	39	54	18	90	41	51
YCR091W	20	8	6	5	27	0	9	1	15	0	6	9	22	1	0	0	11	3	0	13	17	10	5	20	14	4	0	1	0	0	0	0	0	3	2	4	10	1	2	0	23	24	0	1	24	8	15	0	11
YCR092C	36	44	7	15	25	0	32	5	62	0	8	12	76	4	5	0	54	19	0	45	2	37	15	26	33	0	0	7	2	0	0	0	0	10	47	45	62	1	11	0	2	23	3	18	34	17	13	18	37
YCR093W	176	185	25	33	135	0	144	75	117	14	74	50	240	5	25	0	119	128	0	167	156	247	92	97	164	36	0	43	0	0	0	0	0	25	104	245	248	1	30	14	67	258	1	71	74	49	72	110	194
YCR094W	35	22	22	14	74	0	56	13	13	7	11	16	72	6	11	0	91	27	0	100	60	71	9	70	22	5	0	9	0	0	0	0	0	15	80	103	45	3	40	2	22	41	0	7	29	12	41	10	22
YCR095C	24	26	16	11	91	0	27	8	42	0	21	9	52	4	3	0	57	13	0	36	43	51	19	9	20	1	0	4	0	0	0	0	0	9	28	39	53	0	10	6	50	32	0	10	27	9	51	9	26
YCR096C	0	0	0	0	0	0	0	0	0	0	0	0	0	0	0	0	0	0	0	0	0	0	0	0	0	0	0	0	0	0	0	0	0	0	0	0	0	0	0	0	0	0	0	0	0	0	0	0	0
YCR098C	1	14	2	0	0	0	0	2	9	0	0	6	0	0	0	0	12	0	0	0	0	3	0	1	0	0	0	0	0	0	0	0	0	5	46	0	0	0	15	4	26	6	0	9	19	2	0	0	12
YCR099C	18	13	17	26	37	0	12	0	109	0	1	15	13	3	8	0	52	2	0	4	0	39	6	37	4	0	0	9	0	0	0	0	0	15	157	10	27	0	15	0	32	12	0	0	126	6	40	1	6
YCR100C	0	0	0	0	0	0	0	0	0	0	0	0	0	0	0	0	0	0	0	0	0	0	0	0	0	0	0	0	0	0	0	0	0	0	0	0	0	0	0	0	0	0	0	0	0	0	0	0	0
YCR101C	1	0	2	0	0	0	0	0	19	0	0	1	1	0	0	0	8	0	0	0	0	1	0	1	0	0	0	0	0	0	0	0	0	0	5	0	0	0	1	0	0	0	0	0	4	1	0	0	0
YCR102C	0	3	4	0	14	0	11	2	4	0	3	3	6	0	0	0	4	5	0	25	0	5	4	8	0	0	0	1	1	0	0	0	0	7	4	0	3	0	2	0	0	6	0	11	9	0	0	0	0
YCR104W	0	1	5	1	0	0	0	0	13	0	2	3	0	5	0	0	18	0	0	1	8	1	0	1	0	0	0	0	0	0	0	0	0	2	9	12	0	0	0	1	60	2	0	0	15	0	0	3	3
YCR105W	11	2	8	1	28	0	5	3	10	0	0	5	20	0	6	0	5	3	0	10	0	13	1	2	2	0	0	3	0	0	0	0	0	0	3	17	1	0	0	0	3	0	0	2	1	2	0	3	1
YCR106W	3	3	11	2	18	0	2	5	36	0	0	1	3	1	0	0	2	10	0	16	14	6	2	4	4	0	0	5	0	0	0	0	0	5	48	11	8	1	5	0	0	2	0	16	8	0	10	0	9
YCR107W	8	7	8	9	57	0	19	8	69	6	15	20	23	0	7	0	24	18	0	37	1	31	12	65	20	1	0	5	0	0	0	0	0	19	116	23	29	2	33	1	34	19	0	40	77	6	1	15	35
YDL001W	51	42	18	2	31	0	70	12	100	8	9	25	110	1	11	0	54	52	0	66	16	48	57	62	75	5	0	8	0	0	0	0	0	29	52	57	71	2	23	7	59	80	1	14	54	16	30	26	64
YDL002C	27	28	15	3	104	2	51	25	34	7	25	16	59	10	17	0	70	67	0	31	66	86	23	53	46	16	0	8	0	0	0	0	0	6	47	100	55	1	10	0	22	40	0	6	72	24	54	24	39
YDL003W	45	60	31	13	249	0	109	34	64	2	39	35	242	10	22	0	150	99	0	40	105	59	48	185	36	18	0	41	0	0	0	0	0	64	99	157	112	1	26	6	42	174	0	25	180	35	137	45	82
YDL004W	304	238	214	90	614	3	137	69	167	22	175	159	546	15	113	0	249	160	0	191	214	460	140	223	370	94	0	120	5	0	0	0	0	145	185	357	163	4	59	11	50	314	0	155	160	108	366	188	200
YDL005C	82	80	28	15	84	4	83	35	171	7	29	38	321	8	14	1	75	84	0	55	130	162	85	65	99	21	0	17	0	0	0	0	0	40	85	235	185	1	78	5	83	121	0	30	164	34	184	38	110
YDL006W	51	44	38	33	173	0	90	19	120	0	11	20	165	8	11	0	112	31	0	35	61	36	38	68	48	22	0	11	0	0	0	0	0	37	83	167	118	2	39	6	73	74	0	43	130	36	72	33	28
YDL007W	156	145	67	44	348	0	304	74	241	4	75	111	746	29	40	1	319	176	0	211	256	183	137	226	168	40	0	84	0	0	0	0	0	109	274	394	332	5	109	12	147	148	0	42	263	113	126	92	95
YDL008W	46	21	24	6	101	0	46	20	59	0	24	39	53	1	11	0	76	23	0	20	38	75	31	43	59	18	0	14	0	0	0	0	0	13	76	48	44	0	28	0	4	57	0	10	94	15	22	32	46
YDL009C
YDL010W	144	77	77	26	183	0	46	17	113	0	66	67	82	6	21	0	238	29	0	40	133	143	65	95	86	33	0	14	1	0	0	0	0	59	110	89	87	2	44	0	40	116	0	22	147	28	61	92	108
YDL011C
YDL012C	122	138	60	42	208	0	247	87	185	11	50	71	582	20	62	0	173	163	0	104	117	145	108	285	143	34	0	70	4	0	0	0	0	59	209	428	400	10	169	11	76	174	0	105	210	40	161	106	179
YDL013W	19	25	25	13	29	1	30	14	100	1	12	21	90	8	7	0	55	14	0	26	38	39	41	49	38	7	0	6	1	0	0	0	0	10	62	74	46	1	40	0	44	31	0	18	50	8	38	16	31
YDL014W	323	263	17	14	123	4	1070	341	145	42	78	76	2286	14	115	0	168	765	0	718	203	482	183	316	192	31	0	227	4	0	0	0	1	52	150	1877	1245	8	89	72	50	399	0	241	146	29	288	111	333
YDL015C	399	226	94	71	332	0	410	95	320	10	117	106	926	59	87	8	407	236	0	232	244	478	215	275	298	71	0	112	1	0	1	0	0	119	279	768	586	11	150	21	187	311	0	214	367	55	336	125	284
YDL016C
YDL017W	11	6	7	10	14	0	21	7	19	0	2	3	66	0	3	0	48	23	0	31	36	28	10	35	18	5	0	12	0	0	0	0	0	2	32	61	57	0	17	1	22	26	0	0	71	14	19	13	21
YDL018C	52	61	64	22	278	0	62	20	145	2	32	43	190	5	20	0	102	70	0	63	89	62	57	94	58	22	0	25	0	0	0	0	0	47	148	86	76	0	61	1	61	82	0	15	128	25	22	54	49
YDL019C	60	68	33	16	145	2	87	14	121	7	34	42	116	18	13	0	127	36	0	49	65	121	76	69	95	26	0	25	1	0	0	0	0	63	95	96	74	1	38	6	110	96	0	39	114	36	106	39	43
YDL020C	185	150	70	23	91	0	84	22	243	1	84	31	299	5	16	0	73	78	0	139	143	198	143	40	206	28	0	44	5	0	0	0	0	42	184	272	176	0	108	10	118	133	0	75	150	25	49	76	104
YDL021W	84	60	21	7	101	0	4	1	62	0	50	19	9	13	2	0	27	1	0	10	87	101	89	37	128	27	0	2	1	0	0	0	0	19	71	83	0	0	54	1	27	79	0	31	33	31	46	28	72
YDL022W	282	184	182	100	654	5	106	36	603	12	145	133	275	41	30	0	454	103	0	94	301	306	201	178	337	65	0	86	8	0	0	0	0	206	319	452	168	10	602	25	252	186	0	148	381	94	339	177	242
YDL023C
YDL024C	8	8	3	0	0	0	0	0	15	0	7	0	0	0	0	0	14	0	0	0	5	9	3	2	2	3	0	1	0	0	0	0	0	0	22	6	0	0	17	0	32	2	0	0	13	0	2	4	1
YDL025C	73	58	27	25	96	0	50	10	51	2	26	26	72	14	7	0	66	32	0	80	77	100	35	86	69	19	0	8	1	0	0	0	0	31	105	66	42	0	30	0	15	42	0	66	89	23	52	32	64
YDL026W
YDL027C	141	69	36	42	186	0	34	18	137	16	62	45	97	17	10	0	198	25	0	28	120	125	79	120	146	38	0	15	1	0	0	0	0	61	138	86	88	0	48	0	68	97	0	31	161	46	125	71	60
YDL028C	70	64	18	10	76	0	50	8	38	0	33	11	86	11	10	0	36	25	0	28	74	95	49	42	75	26	0	8	0	0	0	0	0	17	64	53	124	2	6	0	6	79	0	44	48	19	139	55	60
YDL029W	209	149	135	73	443	3	246	68	319	7	103	108	570	64	67	0	305	171	0	117	238	296	130	309	225	49	0	74	1	0	0	0	0	107	318	466	311	13	157	17	271	245	1	142	430	109	199	91	221
YDL030W	55	33	13	14	44	0	34	10	37	0	6	15	137	4	6	0	19	44	0	19	50	36	17	39	41	5	0	10	0	0	0	0	0	7	57	122	50	4	13	0	59	41	0	3	45	4	22	38	35
YDL031W	91	70	7	7	51	2	173	144	35	6	20	13	378	6	37	0	54	135	0	148	90	179	69	127	46	23	0	42	2	0	0	0	0	17	86	360	368	3	44	13	56	89	0	25	90	24	119	36	53
YDL032W
YDL033C	14	7	8	0	23	0	29	4	20	0	10	2	30	1	0	0	2	13	0	22	0	26	10	3	21	0	0	6	0	0	0	0	0	3	14	13	16	3	0	0	22	17	0	4	9	2	31	9	11
YDL034W
YDL035C	122	65	7	4	94	0	88	17	68	5	47	15	195	6	25	0	67	48	0	40	135	133	132	67	121	39	0	22	2	0	0	0	0	7	63	126	133	2	7	4	27	130	0	22	17	20	90	62	90
YDL036C	24	17	1	0	40	0	19	3	2	0	4	7	60	2	5	0	30	34	0	10	12	34	23	13	22	4	0	16	0	0	0	0	0	4	24	62	52	0	0	3	15	32	0	20	15	9	20	4	18
YDL037C	0	0	0	0	0	0	0	0	0	0	0	0	0	0	0	0	0	0	0	5	0	0	0	0	0	0	0	0	0	0	0	0	0	0	0	0	0	0	0	0	0	0	0	0	0	0	0	0	0
YDL039C	48	29	9	5	17	0	32	372	25	8	1	32	91	4	56	0	5	33	0	55	0	22	5	20	2	3	0	69	0	0	0	0	0	0	3	179	47	4	1	0	23	60	0	61	67	12	25	0	18
YDL040C	132	126	28	35	219	1	196	31	149	5	88	21	631	37	25	0	183	144	0	127	125	179	117	235	124	17	0	78	0	0	0	0	0	40	330	570	321	5	92	6	141	103	0	121	141	26	122	33	114
YDL041W
YDL042C	68	27	13	6	60	1	88	11	91	5	9	12	146	2	5	0	55	54	0	25	44	71	28	45	51	14	0	13	0	0	0	0	0	26	55	118	52	1	63	8	16	53	0	29	79	10	60	14	59
YDL043C	8	20	3	0	52	0	9	10	3	0	4	10	47	3	10	0	42	4	0	35	15	17	12	36	22	5	0	2	0	0	0	0	0	6	33	28	19	0	20	0	30	27	0	0	48	5	48	4	29
YDL044C	32	14	3	2	15	0	18	8	7	0	9	2	76	7	10	0	27	16	0	38	27	39	27	9	17	4	0	5	0	0	0	0	0	2	6	70	37	0	0	1	6	12	0	27	15	9	7	34	26
YDL045C	52	41	29	24	93	0	58	16	130	0	17	44	97	7	10	0	157	25	0	59	60	42	59	45	66	16	0	15	1	0	0	0	0	20	143	53	54	1	49	6	148	33	0	50	89	13	18	30	42
YDL046W	362	269	88	48	533	1	201	106	271	18	185	152	497	51	88	0	633	150	0	174	673	525	280	275	328	109	0	51	11	0	0	0	0	148	286	446	298	1	94	5	321	316	0	213	286	75	612	227	324
YDL047W	77	70	32	9	89	0	58	38	39	0	19	19	162	11	21	0	63	42	0	44	60	173	53	55	56	6	0	14	0	0	0	0	0	19	42	110	94	1	27	0	25	77	1	2	63	11	40	39	88
YDL048C	57	41	14	0	19	0	9	10	11	1	26	6	78	2	3	0	8	9	0	11	9	58	34	0	41	7	0	4	0	0	0	0	0	4	8	18	12	0	3	1	8	55	1	9	0	1	25	23	48
YDL049C	92	56	18	3	35	0	13	6	18	0	24	22	24	2	17	0	28	7	0	1	12	63	20	30	25	2	2	2	0	0	0	0	0	14	11	26	0	1	1	1	18	78	0	0	37	5	31	44	53
YDL050C
YDL051W	265	222	17	17	100	1	579	195	181	68	58	41	1348	25	102	2	76	457	0	286	194	383	148	313	161	22	0	121	0	0	0	0	0	26	225	914	714	6	127	105	26	343	0	115	190	31	160	131	284
YDL052C	83	79	28	7	65	0	112	47	33	10	32	49	261	3	32	0	122	63	0	88	57	132	35	94	44	24	0	26	0	0	0	0	0	32	74	233	181	2	18	0	44	106	0	72	55	21	62	45	81
YDL053C	109	79	37	5	105	0	98	22	132	0	34	37	180	20	43	0	114	78	0	121	62	101	82	73	79	15	0	29	1	0	0	0	0	26	151	125	61	2	71	1	11	125	0	45	81	32	78	33	80
YDL054C	47	45	23	16	68	0	29	5	75	0	22	14	43	5	26	0	90	15	0	39	121	76	25	60	65	5	0	8	2	0	0	0	0	23	54	32	28	0	10	1	9	66	0	16	70	23	53	30	29
YDL055C	1364	981	263	152	1196	14	2324	332	1371	128	400	332	5067	170	260	1	1492	962	0	1246	931	2024	975	1946	925	262	3	293	16	0	6	0	0	449	1356	4211	2556	36	837	143	486	1942	3	671	1183	330	1278	609	1216
YDL056W	112	143	23	9	52	0	69	48	88	0	43	24	214	25	24	0	109	87	0	77	95	181	116	59	89	40	0	14	1	0	0	0	0	58	71	138	99	0	19	1	32	116	0	61	14	14	123	49	132
YDL057W	60	27	23	10	90	7	8	13	130	1	40	26	42	1	12	0	60	28	0	11	100	83	52	45	68	23	0	5	0	0	0	0	0	6	133	29	7	3	52	5	93	87	0	0	125	15	60	25	82
YDL058W	68	71	14	17	122	2	138	23	86	1	43	36	312	13	6	0	41	90	0	24	85	77	84	101	63	13	0	15	1	0	0	0	0	19	135	231	214	1	75	10	27	88	0	80	179	28	69	29	55
YDL059C	185	183	520	263	1269	3	13	10	463	4	67	441	88	13	32	0	644	5	0	1	181	211	73	213	140	32	0	10	1	0	0	1	0	400	724	26	28	6	186	6	392	158	1	29	1111	319	69	45	152
YDL060W	121	99	16	9	33	1	356	148	104	32	31	22	726	15	48	0	77	261	0	226	81	201	74	141	72	16	0	83	1	0	0	0	0	9	113	682	592	2	33	32	26	131	2	77	104	16	62	52	170
YDL061C	1124	854	136	101	417	11	2857	1206	379	183	370	344	5719	131	682	15	646	2102	1	2327	789	1669	502	765	818	150	2	524	13	0	3	0	4	169	479	3350	2838	27	371	190	216	1175	3	800	371	115	788	579	986
YDL062W
YDL063C	89	74	1	1	29	7	123	49	44	7	7	7	324	1	22	0	16	95	0	43	42	153	39	62	37	3	0	24	1	0	0	0	0	4	50	176	172	1	15	7	1	77	0	36	27	0	17	10	113
YDL064W	133	99	35	28	129	0	189	51	169	13	68	59	629	27	42	5	158	168	0	167	131	179	98	155	107	23	0	47	0	0	0	3	0	30	85	297	226	4	47	6	39	144	0	160	111	46	160	90	148
YDL065C	87	106	21	22	62	1	83	27	149	1	58	44	183	12	36	1	235	100	0	83	97	142	80	123	100	19	0	28	3	0	0	0	0	42	77	199	94	1	68	18	66	108	0	74	183	23	202	49	121
YDL066W	326	289	80	37	88	2	85	25	189	12	92	72	72	46	86	0	279	59	0	62	232	540	81	178	114	41	0	32	9	0	0	0	0	44	111	85	24	2	122	24	52	360	1	80	177	50	161	183	434
YDL067C	450	306	194	54	437	5	95	50	180	10	278	163	371	14	124	0	248	109	0	229	270	543	136	305	443	113	0	54	18	0	0	0	0	179	186	161	66	4	65	15	146	392	0	157	151	97	323	280	282
YDL068W
YDL069C	34	25	13	15	28	0	19	14	9	0	15	12	39	1	5	0	21	11	0	21	1	23	24	28	17	4	0	2	0	0	0	0	0	7	18	13	20	0	7	0	46	24	0	13	22	0	45	2	18
YDL070W	209	198	67	29	102	2	205	78	95	5	62	72	244	21	30	0	162	121	0	139	158	305	171	140	218	32	0	14	5	0	0	0	0	31	177	222	152	1	69	5	136	237	0	135	265	37	250	73	182
YDL071C
YDL072C	169	117	146	102	559	2	195	43	372	13	100	108	583	36	42	1	408	143	2	204	250	215	164	306	249	93	1	60	1	0	0	1	0	122	351	399	358	8	265	19	211	143	0	118	304	127	222	149	144
YDL073W	41	47	28	20	37	6	75	14	108	0	20	23	167	23	10	0	108	132	0	67	49	74	47	110	70	11	0	25	4	0	0	0	0	14	92	160	133	2	56	2	8	51	1	14	168	7	89	38	82
YDL074C	173	117	42	39	222	0	234	53	117	9	61	50	338	22	38	0	113	153	0	119	164	205	117	142	125	30	0	30	0	0	0	0	0	40	188	316	213	2	56	20	54	152	0	113	277	32	215	78	164
YDL075W	858	688	123	86	525	4	3541	1110	328	159	263	277	6564	144	783	12	460	2743	0	1891	496	1300	645	1012	879	174	7	517	12	2	5	0	14	189	492	4036	3347	22	369	244	74	832	14	1003	571	119	624	436	644
YDL076C	70	61	44	45	129	3	70	13	190	1	35	39	178	29	34	0	113	56	0	58	87	127	64	111	109	14	0	16	0	0	0	0	0	48	115	148	124	1	120	0	99	66	0	45	196	39	68	43	67
YDL077C	19	33	27	4	123	0	54	14	75	5	33	22	96	5	4	0	51	24	0	64	42	33	46	68	65	6	0	12	0	0	0	0	0	9	56	61	67	1	42	2	50	61	0	3	40	6	57	20	53
YDL078C	308	259	167	62	730	8	278	67	567	8	206	145	701	73	54	0	484	179	0	219	332	439	247	306	396	96	0	60	7	0	0	4	0	149	418	465	323	9	166	7	285	339	0	162	318	133	339	244	319
YDL079C	8	22	41	8	7	0	9	3	30	0	6	4	39	0	0	0	12	2	0	2	3	22	6	1	26	0	0	0	0	0	0	0	0	5	33	19	10	4	3	0	51	20	0	7	19	4	18	5	15
YDL080C	27	11	13	13	56	0	11	8	63	0	1	15	58	0	8	0	74	16	0	9	40	26	32	51	23	7	0	1	0	0	0	0	0	13	105	36	48	1	9	0	30	20	0	9	77	18	12	19	20
YDL081C	607	490	59	84	428	9	1735	344	256	86	232	141	4164	59	351	4	227	1724	0	1295	605	921	649	587	742	208	2	346	12	0	7	0	0	155	256	2754	2679	23	225	133	33	607	5	673	304	119	825	418	586
YDL082W	391	255	26	7	226	3	1045	319	278	72	78	94	2968	41	207	3	123	797	0	678	256	477	201	233	276	69	3	265	7	0	7	2	1	59	124	1846	1750	11	111	49	17	331	0	441	161	32	168	156	318
YDL083C	556	472	48	26	384	7	2571	880	254	96	155	159	5954	88	463	9	414	1882	0	1558	419	725	395	541	519	118	1	442	7	0	6	2	2	112	342	3508	2780	14	183	127	29	554	4	809	230	76	503	330	466
YDL084W	277	240	81	48	428	2	535	105	253	19	136	103	1328	50	104	0	302	399	0	467	352	373	255	383	318	83	0	106	8	0	0	2	0	86	253	1127	718	10	185	25	105	331	0	284	281	120	286	165	299
YDL085W	21	17	11	5	39	1	4	1	50	0	8	8	4	6	3	0	17	1	0	0	11	29	22	31	23	4	0	1	0	0	0	0	0	4	69	5	8	0	10	0	58	13	0	0	63	21	12	11	21
YDL086W	234	230	127	62	366	4	219	92	474	12	160	152	518	60	69	3	198	131	0	160	261	450	212	297	333	72	1	51	2	0	0	3	0	112	403	401	233	8	153	30	135	252	3	125	392	94	383	206	272
YDL087C	10	4	4	1	2	3	10	2	41	0	8	6	12	2	1	0	22	9	0	7	12	6	0	26	4	0	0	0	0	0	0	0	0	7	46	19	14	0	0	0	37	4	0	0	19	3	0	1	0
YDL088C	79	73	40	6	92	2	45	19	187	3	33	34	169	12	20	0	99	59	0	26	77	116	45	107	92	20	0	16	1	0	0	0	0	30	122	185	130	0	22	3	46	55	0	77	187	24	50	22	70
YDL089W	60	29	27	33	65	3	52	11	87	3	48	25	139	20	8	0	78	49	0	28	25	57	55	84	50	23	0	18	1	0	0	0	0	32	134	178	54	2	25	5	55	34	0	35	73	50	104	28	38
YDL090C	40	30	20	17	105	0	26	7	90	3	29	26	75	9	3	0	39	43	0	73	51	47	26	56	29	3	0	19	0	0	0	0	0	30	100	84	61	0	51	6	56	44	0	20	116	10	64	35	12
YDL091C	47	38	10	10	85	0	52	9	99	1	32	30	61	8	9	0	96	36	0	31	83	25	50	90	50	29	0	11	1	0	0	0	0	24	96	66	10	0	22	1	88	53	0	34	119	25	85	18	48
YDL092W	64	57	55	25	120	0	152	63	116	4	32	51	363	8	38	0	216	131	0	176	79	99	69	121	81	16	0	33	1	0	0	0	0	43	163	241	197	2	65	2	75	74	0	96	100	40	83	36	74
YDL093W	63	31	20	2	45	1	50	19	74	1	19	17	131	8	5	0	48	67	0	10	27	49	19	54	36	6	0	8	1	0	0	0	0	15	30	117	29	1	32	4	30	53	0	4	112	6	25	36	32
YDL094C
YDL095W	163	144	67	31	212	1	224	88	87	15	67	74	527	12	55	0	183	190	0	255	91	202	130	167	161	46	0	49	2	0	0	1	0	47	135	519	350	7	80	8	64	182	0	182	105	32	195	91	177
YDL096C
YDL097C	183	173	129	91	669	2	394	126	488	8	98	166	986	60	76	0	472	222	0	331	198	238	165	396	290	88	0	119	1	0	0	0	0	165	407	663	417	5	230	24	262	203	0	200	555	112	151	142	213
YDL098C	22	35	10	8	74	0	48	15	49	0	6	17	47	3	7	0	21	33	0	34	36	40	27	34	32	3	0	13	0	0	0	0	0	20	50	61	37	2	19	7	28	25	1	1	56	8	24	17	15
YDL099W	88	54	38	15	121	0	147	31	88	2	46	22	235	8	17	0	100	83	0	82	109	62	45	75	67	12	0	29	0	0	0	0	0	31	54	236	167	2	64	6	93	53	0	22	128	16	107	20	82
YDL100C	256	191	105	53	409	1	599	163	280	19	130	146	1282	67	113	1	461	443	0	424	246	331	189	440	252	49	1	130	3	0	1	0	0	139	340	979	614	11	185	23	267	198	0	195	260	91	126	141	209
YDL101C	37	29	26	19	138	0	51	10	60	0	38	32	68	3	4	0	74	31	0	54	67	55	32	55	41	12	0	37	1	0	0	0	0	20	46	78	38	1	41	3	24	98	0	23	197	31	64	43	33
YDL102W	30	31	9	5	67	0	65	17	20	3	14	9	89	3	13	0	37	35	0	44	13	61	10	82	40	22	0	13	0	0	0	0	0	6	34	122	58	0	10	3	28	53	0	41	106	15	20	19	47
YDL103C	42	70	36	20	169	0	88	32	83	25	22	51	193	30	29	0	178	53	0	98	100	91	55	160	41	13	0	28	0	0	0	0	0	57	142	195	168	10	45	18	38	64	0	62	131	34	77	30	47
YDL104C	14	19	16	6	58	0	16	9	89	1	13	14	52	8	14	0	59	21	0	18	41	45	23	59	19	0	0	6	0	0	1	0	0	7	16	56	24	0	12	3	32	14	0	5	68	9	21	23	27
YDL105W	8	15	3	2	30	1	12	6	48	5	2	6	41	0	3	0	31	4	0	9	8	18	9	9	4	0	0	6	0	1	0	0	0	11	17	15	22	0	4	1	12	21	3	9	11	2	5	4	12
YDL106C	37	23	6	8	38	0	31	7	12	1	36	14	23	3	19	0	15	18	0	20	35	29	16	7	27	4	0	1	0	0	0	0	0	18	8	13	25	0	3	0	40	48	1	0	34	17	20	18	20
YDL107W	17	5	15	14	35	0	6	6	15	2	5	7	41	0	5	0	34	9	0	16	12	23	17	27	12	0	0	2	1	0	0	0	0	33	29	23	28	0	10	0	12	19	0	0	33	6	14	21	19
YDL108W	46	29	21	6	54	0	45	12	67	1	18	14	76	9	6	0	53	24	0	64	41	49	37	65	24	12	0	21	0	0	0	0	0	32	74	111	39	0	0	0	42	36	0	38	91	26	19	10	21
YDL109C	1	0	0	0	4	0	6	0	6	0	0	1	0	1	0	0	0	0	0	0	0	0	0	0	6	0	0	0	0	0	0	0	0	1	0	7	0	0	0	0	0	0	0	0	0	0	0	0	1
YDL110C	356	310	330	144	694	4	87	35	460	1	245	238	127	28	48	0	605	27	0	58	473	292	304	110	471	114	0	38	17	0	0	0	0	230	304	155	69	5	300	6	404	292	0	123	383	147	363	298	283
YDL111C	93	60	31	14	154	4	166	89	102	4	27	38	310	10	20	0	132	86	0	89	45	142	58	89	47	16	0	49	0	0	0	0	0	25	74	217	194	0	39	26	65	57	0	35	120	21	73	21	65
YDL112W	94	81	6	16	88	0	235	74	80	9	23	14	400	8	26	0	50	195	0	106	40	134	63	127	75	30	0	48	1	0	0	0	0	4	40	385	326	0	21	5	22	114	0	56	98	5	70	40	44
YDL113C	47	59	34	18	83	0	15	11	106	3	24	23	50	4	5	0	86	9	0	33	20	65	44	53	63	10	0	7	1	0	0	0	0	18	106	41	42	0	50	0	84	78	0	18	105	17	21	44	39
YDL114W	5	2	2	0	0	0	1	1	4	0	5	0	5	0	0	0	0	4	0	0	0	4	7	4	2	0	0	0	0	0	0	0	0	1	0	0	0	0	0	0	1	4	0	0	9	0	6	0	0
YDL115C	16	23	22	15	96	0	22	5	62	0	22	14	33	6	3	0	59	6	0	11	49	44	23	50	31	2	0	13	1	0	0	0	0	14	63	50	22	1	10	2	23	43	0	5	66	17	5	23	27
YDL116W	77	68	27	11	181	2	95	31	99	5	44	28	191	11	35	0	55	36	0	57	69	122	53	119	89	9	0	19	0	0	0	0	0	35	108	149	67	0	36	1	70	117	0	66	82	24	87	49	94
YDL117W	108	86	8	8	64	0	91	25	89	4	25	26	160	11	24	0	118	43	0	77	134	115	57	59	75	25	0	26	1	0	0	0	0	16	53	149	155	2	21	6	26	120	0	38	59	11	68	48	98
YDL118W
YDL119C	26	18	26	9	58	0	37	11	47	0	6	11	39	7	5	0	11	2	0	62	6	27	16	53	13	4	0	11	0	0	0	0	0	9	43	40	37	2	25	0	19	15	0	8	33	11	7	10	15
YDL120W	107	108	57	36	171	1	133	28	93	5	47	53	294	34	44	0	131	100	0	113	63	128	65	96	76	13	0	49	0	0	0	0	0	49	120	258	276	2	90	10	114	46	0	65	120	59	113	48	69
YDL121C	113	91	16	16	59	0	182	85	46	17	31	12	466	11	53	0	86	198	0	139	131	118	88	173	156	22	0	48	0	0	0	0	0	9	70	351	291	0	40	13	66	108	0	51	100	13	107	61	84
YDL122W	179	138	35	19	149	0	220	141	121	5	27	38	581	10	40	0	90	137	0	158	121	159	103	157	109	26	0	65	0	0	0	0	0	35	148	538	329	1	76	13	93	188	0	132	165	23	144	41	124
YDL123W	3	4	9	1	20	0	2	2	24	0	3	5	18	0	4	0	22	8	0	12	6	13	2	0	4	0	0	1	0	0	0	0	0	2	11	19	7	2	0	0	11	9	0	0	33	3	6	9	8
YDL124W	265	248	375	137	1765	2	176	83	735	21	158	436	450	75	44	0	1159	82	0	134	332	247	234	510	329	63	0	74	3	0	0	0	0	430	916	279	247	15	182	18	385	223	0	148	744	317	236	123	178
YDL125C	461	453	288	169	965	4	737	145	1009	44	204	268	1805	67	133	0	864	463	0	475	488	614	382	751	552	133	0	147	7	0	0	0	0	248	1141	988	938	15	424	65	354	476	0	271	832	229	401	356	412
YDL126C	496	410	217	132	1178	2	643	198	772	49	210	236	2079	108	103	1	1123	598	0	792	493	612	423	1082	624	139	0	179	7	0	3	1	0	243	860	1516	1198	22	464	69	472	462	0	353	937	245	372	251	480
YDL127W	37	15	8	16	70	0	39	4	40	4	12	3	99	2	4	0	27	26	0	46	19	17	7	12	16	12	0	11	0	0	0	0	0	11	3	45	36	0	12	8	5	53	0	6	55	1	19	15	24
YDL128W	259	170	26	33	125	1	138	19	45	17	97	28	133	13	22	0	135	77	0	35	102	337	103	39	126	34	0	14	4	0	0	0	0	31	50	46	75	5	38	8	23	179	0	6	85	48	140	80	189
YDL129W	2	1	0	0	0	0	0	2	0	3	0	1	28	0	0	0	11	0	0	1	0	0	1	0	2	0	0	0	0	0	0	0	0	0	0	3	0	0	0	0	0	3	0	2	0	0	0	2	1
YDL130W	1333	1131	121	138	541	11	4938	1362	473	523	450	287	9053	96	726	4	455	3711	3	2583	951	2071	734	1040	1064	246	0	734	8	0	4	0	2	205	608	5805	4652	75	364	566	101	1591	2	1273	518	241	1058	999	1396
YDL131W	734	703	158	112	828	1	281	64	360	18	251	216	739	120	339	0	484	248	0	348	661	1093	421	1296	723	131	0	139	5	0	0	0	0	219	610	513	388	33	241	38	171	696	2	974	513	247	485	379	788
YDL132W	262	265	155	74	323	1	406	71	572	37	126	111	703	29	51	2	335	251	0	138	205	330	153	302	304	72	3	84	8	2	6	1	1	156	524	667	475	14	214	47	136	289	6	103	551	146	282	210	238
YDL133W	25	48	21	10	178	2	29	5	95	0	21	20	74	0	12	0	64	23	0	23	58	28	46	52	26	4	0	13	0	0	0	0	0	27	66	73	44	1	19	0	44	32	0	27	72	23	6	19	21
YDL134C	184	148	82	33	313	0	203	47	280	3	101	109	435	43	41	5	290	170	0	152	235	206	176	205	243	59	0	43	1	0	0	0	0	60	368	317	207	8	176	7	197	192	0	166	384	86	170	124	196
YDL135C	131	106	71	44	234	1	148	54	101	11	48	71	312	12	56	0	190	93	0	178	73	148	85	209	108	39	0	38	7	0	0	0	0	59	121	247	191	2	67	1	37	120	3	93	156	61	68	57	117
YDL136W	298	166	58	39	100	1	905	319	180	37	114	85	1495	44	166	0	188	736	0	365	225	424	241	223	269	70	0	101	2	0	0	0	0	46	153	876	775	6	111	66	43	397	4	206	116	32	290	130	265
YDL137W	1004	693	286	128	1259	6	733	185	788	49	572	353	1989	170	217	0	812	575	0	564	1017	1169	911	1038	1253	283	0	192	10	1	0	0	1	347	795	1418	1029	22	601	27	423	874	1	609	886	230	1009	618	777
YDL138W	146	98	15	25	85	0	57	25	76	3	55	29	101	4	10	0	111	14	0	40	96	185	91	43	106	14	0	18	1	0	0	0	0	15	123	109	67	4	41	1	44	128	0	34	213	22	126	52	146
YDL139C	24	20	7	4	23	0	12	3	32	0	13	6	22	7	7	0	32	7	0	13	16	32	26	30	23	10	0	8	0	0	0	0	0	4	56	32	24	0	11	0	15	41	0	4	42	4	11	23	20
YDL140C	349	321	81	60	263	3	529	173	182	49	96	128	915	37	95	0	259	305	0	240	156	673	178	386	235	85	0	101	8	8	0	1	0	103	275	719	879	8	126	45	82	507	6	194	307	75	267	161	450
YDL141W	38	40	19	9	62	7	80	20	90	0	38	20	230	9	14	0	47	62	0	52	43	127	35	62	50	3	0	10	0	0	0	0	0	30	69	176	104	2	8	0	2	76	0	36	70	8	67	37	60
YDL142C	52	29	35	37	91	0	16	10	167	2	30	46	55	17	11	0	122	19	0	46	127	89	36	92	54	16	0	8	1	0	0	0	0	39	137	55	56	1	37	1	81	45	0	2	113	13	54	23	42
YDL143W	251	236	50	56	433	1	598	193	287	20	88	96	1691	56	79	0	409	461	0	380	293	383	211	633	280	53	0	162	1	0	0	0	0	77	344	1317	1009	6	220	55	138	311	0	307	382	71	322	153	266
YDL144C	113	72	60	28	204	1	64	32	159	4	29	74	243	21	36	0	261	35	0	129	127	127	69	175	106	29	0	25	1	0	0	0	0	55	164	224	125	1	81	5	157	87	1	39	195	38	139	35	108
YDL145C	276	160	69	25	374	5	342	122	169	37	87	85	676	50	50	0	213	361	0	222	130	294	180	308	217	30	0	82	2	0	0	0	0	106	226	667	614	4	157	37	48	287	0	118	310	75	201	121	284
YDL146W	35	14	15	8	14	1	5	6	41	3	2	10	35	0	4	0	17	21	0	9	8	21	13	52	24	5	0	11	0	0	0	0	0	12	41	58	51	0	3	0	22	9	0	20	41	14	37	13	5
YDL147W	165	142	110	58	425	0	293	82	366	9	96	131	721	31	71	0	593	167	0	267	416	262	193	462	219	61	0	61	0	0	0	0	0	135	409	547	404	10	160	5	127	210	0	163	449	88	155	87	245
YDL148C	88	58	0	1	12	0	198	105	18	5	13	5	527	9	29	0	53	193	0	196	36	189	66	120	58	4	0	28	1	0	0	5	0	4	100	489	269	2	12	13	36	119	0	31	112	6	67	28	117
YDL149W	156	118	69	36	345	0	25	8	423	0	39	79	117	8	11	0	194	8	0	46	123	176	178	84	177	33	0	15	1	0	0	0	0	90	199	43	72	6	13	0	155	140	0	25	300	61	74	57	136
YDL150W	163	109	4	9	54	0	294	74	86	40	32	25	525	17	37	0	63	226	0	116	71	239	81	127	106	27	0	79	6	0	0	0	0	14	134	661	434	5	65	36	55	179	0	76	155	20	75	68	123
YDL151C
YDL152W
YDL153C	41	33	1	0	1	0	116	36	8	1	5	7	232	4	8	0	12	69	0	80	22	77	28	36	49	5	0	21	0	0	0	0	0	11	25	131	97	0	16	5	5	63	0	0	33	2	32	13	40
YDL154W	5	8	2	0	0	0	9	7	24	0	0	3	18	6	4	0	16	0	0	0	5	2	4	16	11	3	0	0	0	0	0	0	0	4	28	35	16	0	0	1	9	9	0	18	3	5	22	7	5
YDL155W	23	23	17	5	41	0	34	12	14	0	17	14	107	15	8	0	41	43	0	46	46	53	55	38	41	17	0	14	1	0	0	0	0	8	32	101	37	1	24	1	14	48	0	11	53	8	53	18	33
YDL156W	7	2	2	2	4	0	2	3	11	0	2	4	2	1	0	0	6	7	0	0	15	5	4	10	1	0	0	4	0	0	0	0	0	0	2	32	7	1	2	0	6	10	0	0	0	5	12	1	0
YDL157C	68	61	24	23	84	4	299	93	35	12	24	31	518	24	57	0	137	274	0	304	130	142	105	192	104	15	0	92	0	0	0	0	0	50	90	427	253	4	24	6	38	79	0	87	103	29	59	60	66
YDL158C
YDL159W	81	49	18	12	53	0	42	24	45	0	30	12	94	2	12	0	29	23	0	5	86	86	53	43	83	11	0	12	0	0	0	0	0	25	57	61	64	1	36	6	63	52	0	2	43	6	56	32	76
YDL160C	1	3	4	0	0	0	3	9	6	2	0	1	2	0	0	0	7	2	0	10	3	2	0	1	0	0	0	3	0	0	0	0	0	2	0	0	0	0	7	0	0	7	0	0	11	3	12	2	5
YDL161W	59	46	38	24	87	0	52	26	74	1	22	34	144	11	10	0	116	53	0	39	44	80	33	47	56	25	0	18	0	0	0	0	0	38	92	103	95	2	52	5	61	49	0	22	147	13	58	26	51
YDL162C
YDL163W
YDL164C	35	45	19	19	105	0	90	21	107	0	25	19	149	5	4	0	83	68	0	29	49	32	15	135	21	10	0	17	0	0	0	0	0	22	66	90	92	3	28	4	62	42	0	32	57	14	22	22	28
YDL165W	60	51	19	6	96	0	114	22	112	9	23	32	183	14	24	0	127	76	0	74	75	98	48	158	64	30	0	25	0	0	0	0	0	15	121	167	95	1	57	4	91	63	0	89	67	18	90	37	49
YDL166C	103	120	9	23	73	2	241	66	60	10	49	24	371	9	32	0	117	171	0	108	84	148	94	144	76	24	0	44	0	0	0	0	0	13	113	293	178	7	30	8	62	148	0	118	112	18	115	87	91
YDL167C	44	26	1	0	3	0	91	29	11	6	5	6	168	7	16	0	39	75	0	68	9	86	13	56	30	3	0	29	1	0	0	0	0	4	43	132	105	0	9	2	12	72	0	27	53	7	43	10	50
YDL168W	79	68	39	24	127	0	214	56	105	9	60	42	520	17	43	0	124	79	0	165	87	157	80	95	116	12	0	53	4	0	0	1	0	69	131	314	129	1	65	13	44	111	0	66	99	16	116	48	105
YDL169C	102	62	36	9	97	0	1	1	175	0	83	39	11	8	3	0	107	1	0	12	156	112	102	102	137	22	0	4	0	0	0	0	0	43	189	16	10	1	41	5	128	87	0	5	89	35	52	68	125
YDL170W	88	68	59	16	81	0	18	2	146	0	26	17	49	15	32	0	157	7	0	0	60	93	32	136	63	11	0	6	2	0	0	0	0	14	58	54	15	0	72	1	16	140	0	24	132	44	38	36	93
YDL171C	473	525	59	22	214	1	156	33	43	25	363	66	203	24	111	1	284	81	0	101	312	456	133	246	468	62	0	27	2	0	0	0	0	80	132	171	157	5	71	25	49	643	0	95	179	73	472	259	584
YDL172C
YDL173W	104	75	36	21	125	1	103	29	39	8	23	41	217	16	36	0	107	66	0	39	86	118	76	98	96	23	0	28	1	0	0	0	0	39	60	204	85	1	63	12	10	144	0	88	157	22	156	67	78
YDL174C	133	131	86	78	364	1	90	35	308	3	60	111	259	98	151	0	488	56	0	21	237	224	150	452	121	28	0	34	1	0	0	0	0	143	347	274	131	6	117	5	188	141	1	429	359	127	225	130	95
YDL175C	34	22	10	7	33	0	31	7	39	0	36	13	59	1	7	0	65	15	0	36	38	44	9	38	20	8	0	10	0	0	0	0	0	19	47	56	67	0	8	0	11	32	0	7	46	1	0	12	18
YDL176W	54	62	19	17	25	0	47	17	71	7	29	22	61	9	2	0	113	27	0	22	8	66	51	48	40	12	0	9	0	0	0	0	0	22	94	32	21	0	9	1	41	43	0	29	88	10	25	25	61
YDL177C	36	32	20	9	96	0	61	17	107	1	13	14	118	10	26	0	45	31	0	104	58	69	26	72	46	12	0	12	13	0	0	4	0	15	141	91	66	4	20	10	24	47	0	15	113	19	42	17	47
YDL178W	90	64	29	28	235	0	114	30	72	3	45	39	231	13	34	0	130	62	0	74	101	112	41	163	103	25	0	34	0	0	0	0	0	30	159	220	192	3	59	10	31	75	0	140	74	31	123	55	55
YDL179W	24	39	20	7	55	0	18	8	26	6	10	7	56	0	16	0	75	12	0	40	42	53	28	19	60	12	0	7	0	0	0	0	0	16	32	103	20	1	4	0	35	47	0	13	69	14	50	29	35
YDL180W	48	55	39	42	207	0	13	11	102	0	16	43	72	2	12	0	132	33	0	53	38	70	44	36	44	9	0	18	0	0	0	0	0	46	84	78	33	6	40	0	69	49	0	19	221	22	18	15	55
YDL181W	111	100	79	10	171	5	3	18	62	2	92	47	22	1	18	0	198	24	0	29	20	159	22	56	146	40	0	22	1	0	0	0	0	31	76	22	0	3	21	4	63	104	1	8	49	44	211	118	70
YDL182W	663	438	129	165	1315	9	509	64	336	24	349	315	1336	179	790	6	548	426	1	483	911	919	488	1938	887	80	0	271	7	0	0	0	0	333	492	1222	870	35	181	38	127	564	1	1817	586	306	683	355	565
YDL183C	29	20	13	4	38	0	12	6	37	0	8	10	13	3	3	0	48	9	0	30	60	44	26	64	49	9	0	2	0	0	0	0	0	13	55	26	12	0	7	2	22	22	0	17	57	13	62	35	35
YDL184C
YDL185W	1011	923	142	88	755	22	897	205	412	108	351	229	1651	114	167	5	855	625	0	655	789	1365	648	879	869	160	1	163	10	0	0	0	1	230	567	1331	1143	38	531	94	329	1035	1	365	537	169	508	514	1062
YDL186W	0	0	1	0	0	0	0	0	0	0	0	0	0	0	0	0	0	0	0	0	0	1	0	1	0	0	0	1	0	0	1	0	0	0	1	1	0	0	0	0	0	0	2	0	0	0	0	0	0
YDL187C
YDL188C	109	95	29	25	99	3	89	33	106	17	36	38	160	8	25	0	175	40	0	84	44	193	42	83	60	5	0	12	1	0	0	0	0	29	60	65	77	2	37	3	40	114	0	76	151	19	48	32	104
YDL189W	59	61	22	14	97	0	96	33	96	5	18	18	263	18	10	0	84	55	1	35	43	98	48	59	70	10	0	18	0	0	0	0	0	25	160	236	128	1	55	1	36	77	1	44	107	4	71	28	87
YDL190C	51	45	30	13	129	0	43	11	50	0	39	20	175	3	9	0	94	26	0	38	65	81	32	78	81	17	0	35	0	0	0	0	0	37	152	103	72	4	53	0	46	75	0	32	99	39	10	19	52
YDL191W	41	23	7	7	42	1	162	68	42	11	22	26	461	19	42	2	35	163	0	142	38	50	50	49	40	15	0	36	0	0	0	0	2	18	35	239	177	2	14	12	0	42	0	42	23	8	38	23	36
YDL192W	561	431	191	98	948	8	1130	452	501	35	237	221	2950	95	294	2	554	944	0	740	590	670	423	857	644	111	5	316	11	0	2	0	0	232	454	2352	1602	13	370	47	241	527	2	719	506	139	623	293	459
YDL193W	103	61	28	1	156	0	82	22	98	2	37	26	261	7	7	0	109	72	0	69	77	92	65	112	97	10	0	28	0	0	0	0	0	33	189	240	154	0	71	6	43	80	0	17	177	34	44	41	80
YDL194W	17	31	14	0	9	0	15	3	4	2	12	1	65	1	9	0	6	32	0	3	43	56	23	2	39	3	0	5	0	0	0	0	0	12	10	21	25	0	5	0	7	33	0	0	22	5	44	14	31
YDL195W	171	209	63	38	219	0	318	88	181	9	69	69	638	32	63	1	329	231	0	164	284	291	174	230	204	66	0	70	2	0	1	1	0	87	184	518	402	1	121	9	51	259	0	157	234	72	279	90	224
YDL196W
YDL197C	58	26	25	15	98	1	31	11	208	0	29	21	117	2	13	0	134	31	0	12	21	62	44	80	42	13	0	3	0	0	0	0	0	20	128	117	60	0	89	4	80	37	0	25	168	66	181	30	35
YDL198C	629	478	126	85	560	6	79	24	372	20	244	106	288	103	382	0	341	122	0	199	524	750	296	914	491	136	0	83	12	0	0	0	0	154	242	97	95	12	169	18	118	479	1	1061	243	134	318	345	623
YDL199C	41	27	5	2	65	0	1	0	57	2	6	2	7	0	5	0	28	5	0	0	50	43	16	12	55	20	0	0	0	0	0	0	0	11	9	10	15	0	10	0	35	55	0	3	25	5	30	25	29
YDL200C	124	86	34	7	155	3	30	9	116	0	39	38	69	4	25	0	115	31	0	20	38	102	74	99	119	16	0	19	0	0	0	0	0	24	97	82	44	3	36	7	85	121	0	59	173	28	70	41	123
YDL201W	40	67	6	6	21	1	148	63	20	12	14	9	295	11	17	0	15	84	0	77	41	123	46	33	24	7	0	28	0	0	0	0	0	4	24	230	121	3	35	2	20	49	0	27	40	2	77	23	51
YDL202W	51	35	24	8	59	0	89	20	52	4	14	33	142	0	20	0	21	23	0	63	41	69	26	73	35	16	0	15	0	0	0	0	0	21	19	56	101	2	16	1	24	99	0	54	58	15	86	30	22
YDL203C	66	79	21	15	110	0	77	11	213	10	14	22	84	4	14	0	67	33	0	52	54	86	64	85	93	15	0	20	1	0	0	0	0	25	165	102	107	4	40	3	54	62	0	8	118	27	49	20	42
YDL204W	54	45	15	14	60	0	1	1	47	0	32	31	9	2	2	0	91	16	0	22	8	37	38	20	71	18	0	2	0	0	0	0	0	20	42	8	8	2	43	0	94	50	0	2	58	13	47	35	37
YDL205C	54	73	25	12	34	0	42	19	65	4	11	10	96	1	14	0	53	28	0	70	16	60	6	37	18	7	0	12	1	0	0	0	0	11	35	86	61	0	27	9	0	70	0	29	35	14	26	20	36
YDL206W	135	79	41	4	48	1	68	78	92	17	37	40	161	0	24	5	189	59	0	52	54	101	42	132	50	8	0	29	2	0	0	0	0	28	76	148	83	0	3	8	55	71	0	0	104	11	56	33	94
YDL207W	44	58	16	6	80	0	58	15	51	0	26	24	128	6	5	0	70	17	0	26	63	94	31	84	55	7	0	10	1	0	0	0	0	15	40	58	69	3	29	0	11	70	0	36	74	15	92	12	63
YDL208W	256	238	20	16	54	0	653	291	95	13	56	81	1160	24	118	0	120	404	0	441	176	462	107	364	160	24	0	109	2	1	0	0	0	27	141	989	596	7	68	40	44	247	0	118	125	33	190	56	220
YDL209C	23	32	10	0	30	0	29	21	53	0	26	7	58	4	4	0	40	6	0	23	15	62	23	52	106	9	0	3	0	0	0	0	0	7	20	68	24	1	6	0	4	36	0	12	38	2	38	11	27
YDL210W	43	55	2	6	18	2	20	3	82	0	1135	8	5	6	2	0	67	0	0	0	19	80	36	32	2351	10	0	0	1	0	0	0	0	2	23	25	12	0	39	0	4	36	0	0	52	15	41	66	69
YDL211C	13	15	20	12	45	0	23	14	34	3	12	16	43	4	8	0	20	25	0	4	26	57	17	40	30	12	0	9	0	0	0	0	0	7	40	72	60	0	3	0	0	34	0	0	30	3	39	19	20
YDL212W	341	196	72	35	255	4	356	88	230	41	137	71	752	32	85	0	201	300	0	253	308	462	275	308	340	68	0	57	2	0	0	0	0	100	181	588	380	11	264	28	48	332	0	68	159	69	285	167	239
YDL213C	131	113	16	10	46	0	257	128	50	40	12	36	469	7	29	0	70	199	0	216	69	205	58	113	64	11	0	73	1	0	0	0	0	5	126	591	330	4	70	47	15	201	0	56	57	28	103	65	186
YDL214C	2	8	15	13	53	0	12	2	76	3	8	7	8	3	0	0	12	0	0	0	6	4	5	2	4	0	0	2	0	0	0	0	0	7	12	7	13	1	98	0	16	2	0	1	26	6	3	10	2
YDL215C	611	185	40	18	99	1	32	14	68	4	74	35	58	9	10	0	47	15	0	43	468	833	487	16	351	170	0	6	0	0	0	3	0	17	59	30	59	4	186	6	56	683	0	34	128	18	154	160	797
YDL216C	16	27	15	16	37	0	7	4	73	2	6	5	23	2	6	0	32	18	0	16	20	25	17	25	37	4	0	4	0	0	0	0	0	14	66	12	9	0	22	0	40	10	0	6	46	11	34	26	26
YDL217C	18	15	12	4	64	0	17	10	52	0	8	2	86	12	8	0	22	19	0	21	12	45	8	42	27	2	0	3	0	0	0	0	0	3	52	62	59	4	37	0	8	13	0	15	48	5	31	9	21
YDL218W	12	7	2	0	2	0	3	0	0	0	1	1	0	0	0	0	0	1	0	0	27	9	5	0	5	3	0	2	0	0	0	0	0	0	0	2	0	0	0	0	16	16	0	0	5	0	0	13	0
YDL219W	64	22	22	3	84	1	109	22	27	0	37	18	181	4	20	0	63	67	0	51	63	73	47	61	55	12	0	35	0	0	0	0	0	20	33	95	96	2	35	1	28	56	0	15	70	15	60	42	34
YDL220C	5	15	4	2	6	0	4	6	17	0	12	7	5	2	1	0	15	2	0	5	8	13	9	9	19	1	0	4	0	0	0	0	0	4	18	36	21	0	6	0	6	27	0	0	27	4	0	1	18
YDL221W
YDL222C	29	21	1	0	31	0	0	0	46	0	11	5	6	1	0	0	80	5	0	0	55	14	14	9	20	6	0	0	0	0	0	0	0	3	10	5	6	0	43	0	83	9	0	0	15	0	73	15	3
YDL223C	31	25	6	0	4	0	7	2	17	0	6	8	3	3	0	0	104	0	0	0	4	45	5	12	12	0	0	0	0	0	0	0	0	0	12	4	0	1	3	0	15	26	0	0	14	2	5	3	11
YDL224C	61	48	28	16	100	1	49	16	52	3	16	36	88	7	19	0	69	33	0	70	36	109	49	25	46	7	0	15	0	0	0	0	0	26	106	98	53	0	17	9	57	76	0	17	85	25	92	34	77
YDL225W	39	54	14	26	52	2	73	27	43	2	11	21	162	11	14	0	45	78	0	46	39	65	34	48	35	4	0	22	0	0	0	0	0	6	53	120	91	1	11	7	36	61	0	46	70	16	32	42	48
YDL226C	190	134	73	30	418	1	249	129	191	16	83	77	702	55	76	0	328	162	0	140	175	253	141	318	241	68	0	71	0	0	0	0	0	81	298	460	403	5	105	23	142	121	0	123	267	57	204	104	165
YDL227C	44	23	14	17	54	0	124	135	19	5	30	16	215	2	85	0	27	88	0	62	66	93	23	59	28	27	0	23	1	0	0	0	0	23	33	117	130	0	15	7	11	64	0	104	55	13	109	59	41
YDL228C
YDL229W	590	405	17	15	210	2	1784	628	198	136	94	110	5256	74	274	17	221	1365	0	883	358	797	289	498	412	127	2	522	4	0	2	1	0	39	256	3652	2948	12	115	132	70	597	4	671	286	26	493	243	497
YDL230W	32	42	18	29	113	0	29	8	90	1	4	19	69	13	21	0	68	21	0	27	26	42	11	58	51	6	0	9	0	0	0	0	0	14	66	51	53	2	21	1	40	53	0	32	98	13	47	11	30
YDL231C	128	114	23	10	200	0	60	15	131	0	49	48	108	1	5	0	111	62	0	36	134	150	92	133	121	32	0	13	0	0	0	0	0	26	154	142	35	2	97	6	43	168	0	13	208	46	197	52	145
YDL232W
YDL233W	45	48	18	5	70	0	41	21	80	4	30	18	101	7	8	0	47	21	0	54	33	60	52	60	76	18	0	17	0	0	0	0	0	23	99	87	75	2	43	0	51	47	0	11	73	23	130	28	48
YDL234C	35	27	21	15	47	0	5	15	99	1	12	22	39	2	4	0	72	5	0	28	73	36	48	24	63	16	0	5	0	0	0	0	0	8	97	50	38	1	15	5	12	45	0	7	81	13	58	25	33
YDL235C	143	188	97	35	290	3	278	128	179	25	91	90	472	25	81	0	176	203	3	170	185	283	116	154	162	38	0	59	1	0	0	0	0	116	179	308	226	3	59	17	60	234	0	88	227	103	240	107	205
YDL236W	249	202	29	26	235	2	202	68	134	8	57	48	433	12	69	1	132	110	0	155	221	371	175	172	201	66	0	53	1	0	0	0	0	64	163	296	215	4	128	7	90	229	0	53	203	50	102	132	344
YDL237W	153	140	56	52	387	3	93	18	340	2	33	82	352	34	27	0	206	66	0	107	129	185	102	204	169	55	0	14	0	0	0	0	0	60	272	307	216	2	108	2	241	132	0	124	261	54	174	51	153
YDL238C	21	21	11	15	53	0	2	2	66	0	49	8	7	0	0	0	32	1	0	3	16	14	16	35	27	10	0	0	0	0	0	0	0	16	86	7	2	1	14	5	1	14	0	0	84	15	21	21	10
YDL239C	92	64	8	8	37	0	15	1	49	0	55	16	7	2	2	0	73	0	0	9	66	67	37	9	82	9	0	0	2	0	0	0	0	7	89	22	5	1	24	5	34	93	0	2	135	16	84	8	85
YDL240W	43	40	4	8	19	0	21	12	15	12	22	6	43	0	8	0	54	16	0	47	30	98	57	21	42	5	0	9	1	0	0	0	0	10	17	42	49	1	12	2	28	65	0	35	43	14	23	40	63
YDL241W	3	6	7	17	4	0	66	29	10	2	1	7	156	0	10	0	2	33	0	49	0	7	2	20	13	0	0	44	0	0	0	0	0	11	20	73	84	1	3	4	7	6	0	34	18	4	4	10	7
YDL242W
YDL243C	4	17	18	3	18	0	0	5	72	0	1	8	23	0	1	0	32	2	0	15	1	5	0	20	3	0	0	4	0	0	0	0	0	17	41	9	5	0	7	6	37	1	0	1	46	15	5	1	6
YDL244W
YDL245C
YDL246C	0	0	0	0	0	0	0	0	0	0	0	0	0	0	0	0	0	0	0	0	0	0	0	0	0	0	0	0	0	0	0	0	0	0	0	0	0	0	0	0	0	0	0	0	0	0	0	0	0
YDL247W
YDL248W
YDR001C	540	534	226	137	969	2	151	40	1003	7	281	217	247	123	49	0	974	79	0	82	494	609	601	510	683	122	0	87	12	0	0	0	0	211	860	267	256	19	360	10	803	543	0	160	1136	200	486	271	376
YDR002W	476	372	133	49	570	5	788	239	337	23	199	151	1931	82	139	12	409	567	0	692	377	538	380	595	487	131	1	222	6	1	21	0	0	181	259	1232	945	19	220	41	203	479	3	265	456	96	459	161	335
YDR003W	70	59	33	17	99	0	14	4	114	2	33	28	67	2	9	0	79	21	0	16	104	72	40	42	41	10	0	13	0	0	0	0	0	11	49	97	47	2	39	0	95	43	0	27	64	11	66	17	96
YDR004W	39	37	29	28	134	4	14	5	147	4	20	33	41	2	3	0	85	19	0	45	47	62	46	34	35	15	0	4	0	0	0	0	0	25	98	41	17	4	5	4	36	39	0	37	90	16	32	36	33
YDR005C	108	50	21	7	40	3	17	7	45	0	33	19	49	6	4	0	55	38	0	28	94	75	68	33	65	26	0	1	0	0	0	0	0	21	27	163	49	2	31	0	34	69	0	39	92	5	80	30	31
YDR006C	116	83	17	1	57	5	77	30	84	5	7	8	125	9	20	0	82	33	0	38	42	126	35	44	54	13	0	7	0	0	0	9	0	6	103	82	68	3	32	8	43	99	1	46	64	3	73	43	71
YDR007W	126	140	51	32	274	4	100	45	219	20	52	68	265	23	30	0	185	67	0	88	104	122	76	129	92	15	0	29	0	0	0	0	0	38	160	184	126	8	44	8	216	145	0	38	202	44	64	53	88
YDR008C
YDR009W	4	1	7	1	8	0	1	1	10	0	0	0	21	0	2	0	1	2	0	0	0	7	2	0	8	2	0	1	0	0	0	0	0	6	22	11	0	0	0	0	6	5	0	0	5	0	0	0	0
YDR010C
YDR011W	206	175	45	19	193	1	902	177	87	55	59	75	1766	28	50	0	156	588	0	483	148	309	186	181	205	42	0	275	5	0	0	2	0	50	192	1324	1337	8	67	83	49	260	0	197	200	48	220	122	227
YDR012W
YDR013W	53	38	42	36	151	0	70	18	92	8	28	29	113	8	11	0	95	51	0	15	58	48	20	88	32	25	0	14	1	0	0	0	0	54	126	89	93	0	24	5	54	40	0	31	64	13	55	36	60
YDR014W	3	1	7	0	11	0	2	0	23	0	0	4	5	0	0	0	4	2	0	4	1	0	11	17	1	0	0	1	0	0	0	0	0	1	7	1	6	1	12	0	0	2	0	0	0	5	0	0	6
YDR015C
YDR016C	58	60	74	20	220	0	82	10	269	0	33	58	130	14	46	0	129	37	0	128	32	92	80	80	99	35	0	12	6	0	0	0	0	67	253	105	127	5	48	4	70	49	0	101	121	56	110	73	50
YDR017C	177	155	17	35	60	1	107	36	147	20	68	25	216	19	18	0	92	85	0	73	153	213	140	89	166	40	0	25	0	0	0	0	0	8	141	188	143	3	30	11	35	222	0	70	151	33	153	81	116
YDR018C	8	18	4	0	12	0	5	0	12	0	0	2	6	1	0	0	14	3	0	1	0	17	2	2	13	5	0	0	0	0	0	0	0	1	9	6	0	0	13	0	0	5	0	10	15	0	8	16	8
YDR019C	251	256	247	93	810	4	141	11	1254	14	79	175	317	30	42	0	888	104	0	123	165	200	140	403	191	64	0	29	3	0	0	0	0	203	1371	184	225	25	138	8	27	218	0	102	1496	125	297	67	237
YDR020C	20	3	1	0	6	0	21	2	37	0	4	4	24	0	2	0	0	6	0	14	22	7	11	22	14	3	0	5	0	0	0	0	0	1	22	42	29	0	0	0	0	3	0	0	0	0	6	0	11
YDR021W	31	27	3	0	15	0	30	14	4	7	0	2	70	5	3	0	14	37	0	13	8	39	7	19	16	3	0	7	0	0	0	0	0	1	9	67	42	0	12	0	26	31	0	21	71	0	0	3	20
YDR022C	46	40	17	10	106	0	17	1	53	1	35	23	27	22	4	0	115	14	0	30	41	71	35	28	53	21	0	6	0	0	0	0	0	18	73	48	27	1	27	5	40	40	0	7	57	15	64	48	30
YDR023W	414	350	35	28	326	2	825	264	246	85	93	103	2106	67	95	0	314	649	0	215	314	615	258	454	369	47	0	213	2	0	0	0	0	111	259	1903	1335	11	167	128	51	419	0	368	292	89	363	180	365
YDR024W
YDR025W
YDR026C	71	50	11	4	82	0	23	34	68	6	9	25	93	10	14	0	57	37	0	58	24	73	31	60	53	6	0	8	0	0	0	0	0	19	60	99	87	0	1	2	9	69	0	63	59	11	51	31	50
YDR027C	62	62	29	22	150	2	50	24	196	1	36	26	121	12	13	0	131	63	0	45	77	107	64	91	81	50	0	19	1	0	0	0	0	35	123	138	94	1	40	12	127	96	0	40	162	54	101	67	53
YDR028C	154	192	65	27	241	5	117	33	158	5	76	60	272	29	17	0	153	80	0	121	190	208	149	184	147	76	0	62	2	0	0	0	0	41	156	279	186	3	98	13	121	179	0	98	252	95	177	106	217
YDR029W
YDR030C	29	25	1	4	29	0	13	4	39	0	7	7	18	2	2	0	56	4	0	13	10	42	33	1	39	11	0	1	0	0	0	0	0	7	24	25	14	0	38	0	8	17	0	0	23	2	22	14	28
YDR031W	75	44	47	6	54	0	31	4	110	0	44	61	42	13	5	0	119	22	0	26	99	80	43	59	59	7	0	4	0	0	0	2	0	33	64	30	26	0	8	4	94	58	0	48	48	31	69	25	32
YDR032C	611	535	373	104	1180	12	308	58	627	24	324	367	692	138	158	0	1152	152	0	243	596	810	500	978	776	163	0	111	17	0	0	0	0	310	580	432	306	34	328	24	536	636	0	290	603	190	441	315	428
YDR033W	87	98	11	7	61	0	127	29	15	3	52	16	255	11	40	0	37	51	1	129	172	79	38	63	113	12	0	21	1	0	0	0	0	18	12	270	262	0	14	2	8	104	0	31	19	6	94	90	43
YDR034C	75	92	23	12	143	0	23	10	113	5	39	10	41	17	6	0	85	23	0	19	80	94	83	90	87	24	0	14	1	0	0	0	0	27	104	30	60	2	25	1	45	110	0	49	93	41	47	34	95
YDR035W	109	101	43	8	48	1	78	17	96	2	26	40	93	41	120	0	58	37	0	97	99	209	58	126	86	8	0	26	10	1	0	0	0	26	42	111	66	6	37	9	14	147	3	141	44	22	30	38	113
YDR036C	26	17	19	8	20	0	44	14	12	3	25	9	45	5	15	1	19	30	1	21	41	51	19	70	34	2	0	18	0	0	0	0	1	14	37	54	38	0	18	0	36	70	8	34	38	8	21	16	51
YDR037W	46	39	2	2	47	0	89	19	39	1	9	7	272	7	29	4	25	60	1	93	70	53	30	47	41	7	0	46	0	0	0	2	2	7	63	195	155	2	29	17	0	37	2	64	52	9	37	35	35
YDR038C
YDR039C
YDR040C
YDR041W	93	108	32	28	58	7	48	25	28	5	74	35	116	7	18	0	90	23	0	27	134	130	53	44	118	41	0	15	3	0	0	0	0	28	29	57	65	2	24	8	12	110	0	23	93	21	93	56	73
YDR042C	8	6	2	0	4	0	0	0	20	0	0	5	2	0	0	0	0	7	0	18	5	5	0	3	3	0	0	4	0	0	0	0	0	0	4	7	1	1	0	0	19	2	0	0	11	11	20	4	7
YDR043C	42	44	21	7	63	0	15	1	83	0	20	34	5	2	2	0	76	14	0	41	10	37	16	11	45	1	0	1	1	0	0	0	0	0	43	16	6	0	18	0	51	16	0	11	115	8	49	34	21
YDR044W	70	56	18	1	61	0	94	23	28	0	48	25	140	4	3	0	62	15	0	34	35	76	28	18	50	3	0	16	1	0	0	0	0	8	10	146	110	0	19	0	18	62	1	46	28	1	37	32	83
YDR045C	96	56	17	7	91	0	177	53	63	5	8	29	247	7	25	0	65	89	0	170	46	100	33	156	80	22	0	35	2	0	0	6	0	41	97	227	102	0	29	3	33	82	0	46	53	10	36	34	66
YDR046C	97	62	13	10	78	0	224	94	253	7	25	43	637	35	74	0	107	165	0	205	116	137	43	314	129	5	0	79	2	0	0	0	1	14	209	410	418	8	32	29	50	50	0	284	140	19	112	69	70
YDR047W	48	34	14	24	78	1	146	35	76	8	15	36	292	13	13	0	84	76	0	81	11	81	40	85	45	8	0	31	0	0	0	0	0	22	87	166	185	3	50	11	34	79	1	48	69	31	55	25	58
YDR048C
YDR049W	24	31	11	4	28	0	15	19	26	0	13	5	82	5	9	0	27	33	0	54	35	56	11	45	22	6	0	15	0	0	0	0	1	8	56	89	27	0	2	3	44	21	0	24	67	14	0	18	27
YDR050C	1182	992	633	289	2789	32	2032	333	997	149	563	540	5174	203	495	10	1243	1624	4	1137	1366	1679	1189	1675	1592	317	4	535	27	2	12	6	3	637	1141	4546	2894	54	567	178	669	1308	12	1241	1200	571	1411	640	1385
YDR051C	48	77	34	18	120	3	72	16	48	6	18	39	210	11	9	0	116	42	0	66	46	57	47	108	66	13	0	34	1	0	0	0	0	25	42	171	111	4	31	7	66	51	0	18	106	24	89	34	45
YDR052C	122	84	28	19	87	1	106	26	77	1	56	39	136	15	11	0	96	61	0	91	54	150	101	84	103	21	0	21	0	0	0	0	0	51	101	181	136	2	14	3	6	135	0	17	81	37	101	49	86
YDR053W
YDR054C	34	57	27	8	29	3	14	20	45	2	10	17	66	2	3	0	20	25	0	34	17	81	16	31	32	15	0	6	0	0	0	0	0	12	51	38	41	0	9	1	22	68	0	21	51	8	14	12	56
YDR055W	120	109	32	10	288	2	85	37	121	10	68	22	155	10	37	0	87	78	0	175	80	133	78	78	166	65	0	56	1	0	0	0	0	61	155	175	160	6	46	30	62	183	0	25	99	27	175	81	101
YDR056C	92	104	41	31	225	2	153	44	106	0	32	47	292	21	25	0	180	71	0	85	95	165	91	192	105	32	0	32	1	0	0	0	0	34	122	262	116	2	75	12	80	97	3	95	87	27	74	52	82
YDR057W	15	16	5	0	46	0	14	5	2	0	5	7	11	3	0	0	14	12	0	11	29	21	16	11	13	1	0	1	1	0	0	0	0	5	19	11	17	0	1	0	17	22	0	0	32	3	16	6	13
YDR058C	30	10	7	0	25	0	6	5	15	2	3	4	21	0	2	0	8	0	0	19	0	33	11	25	29	7	0	5	0	0	0	0	0	4	1	3	16	0	11	0	6	7	0	0	5	4	27	27	9
YDR059C	195	229	62	32	255	1	54	27	179	3	141	41	98	44	35	0	209	15	0	69	202	247	159	137	356	67	0	18	3	0	2	0	0	75	221	66	56	4	198	6	89	271	0	80	113	56	82	151	170
YDR060W	196	131	4	4	7	0	318	127	42	53	28	17	507	4	27	0	62	225	0	161	48	269	64	161	73	17	0	44	3	0	0	0	0	16	50	466	240	5	58	57	0	247	0	43	77	8	35	64	241
YDR061W	72	68	44	40	191	2	61	22	79	2	41	42	205	12	16	0	65	47	0	66	73	96	85	125	70	31	0	18	1	0	0	0	0	74	149	144	101	1	32	0	65	66	0	75	221	41	92	45	69
YDR062W	110	55	26	21	102	2	165	47	80	16	31	38	389	22	35	0	64	118	0	74	42	132	95	115	86	17	0	45	0	0	0	0	0	49	125	281	236	9	46	22	41	122	0	117	139	34	63	50	88
YDR063W	96	76	50	23	177	0	119	27	64	7	63	69	289	8	31	0	157	99	0	102	136	103	80	115	110	39	0	29	6	0	0	0	0	55	104	195	128	2	23	1	86	94	0	111	98	43	125	76	111
YDR064W	1618	1413	232	144	1005	20	6382	1898	545	335	429	495	12606	199	1127	4	790	4087	0	4232	1734	2585	1246	1694	1571	257	0	1116	21	0	3	0	6	281	1032	8099	6475	50	529	427	158	1760	4	2359	843	237	1239	1253	1255
YDR065W	15	4	1	4	11	0	8	1	34	0	6	3	2	0	2	0	21	2	0	1	0	2	1	0	2	0	0	8	0	0	0	0	0	8	7	28	0	0	0	0	8	4	0	4	16	4	14	10	11
YDR066C	23	27	12	7	33	0	25	11	64	0	0	17	24	4	3	0	23	7	0	4	1	22	13	24	29	6	0	8	0	0	0	0	0	16	73	14	29	0	10	0	19	16	0	8	52	8	18	18	11
YDR067C	39	21	25	23	98	0	35	17	40	3	39	15	107	5	16	0	50	31	0	40	83	41	44	60	36	9	0	9	0	0	0	0	0	9	101	67	39	0	29	8	62	18	0	29	72	22	48	11	29
YDR068W	42	43	22	23	80	1	93	15	86	16	24	19	157	1	12	0	96	75	0	82	46	90	43	132	68	12	0	24	0	0	0	0	0	11	65	98	83	5	34	6	33	69	0	10	134	32	101	50	47
YDR069C	40	24	6	2	20	0	15	4	37	0	25	12	22	2	1	0	7	8	0	11	22	67	20	16	39	10	0	4	0	0	0	0	0	8	20	13	19	1	30	0	36	19	0	12	35	0	0	14	30
YDR070C	609	505	79	27	152	13	8	4	343	11	343	102	6	35	1	0	649	6	0	47	285	256	720	204	1027	132	0	3	5	0	0	0	0	81	376	16	10	2	111	7	764	517	0	5	369	19	266	380	191
YDR071C	240	92	70	52	312	0	304	74	195	6	64	115	804	16	55	0	259	235	0	235	256	270	143	205	217	59	0	65	2	0	0	0	0	51	233	490	472	8	141	22	54	110	0	73	178	68	180	99	188
YDR072C	32	62	28	18	92	0	88	42	23	4	15	24	162	2	9	0	40	66	0	85	45	96	35	19	44	20	0	23	0	0	1	0	0	14	90	112	143	0	46	2	32	72	0	52	34	8	37	30	80
YDR073W	73	54	113	50	218	0	80	37	169	2	22	78	182	3	18	0	193	59	0	57	58	137	57	75	57	18	0	10	1	0	0	0	0	57	203	67	58	0	78	8	96	74	0	31	168	62	54	36	61
YDR074W	321	226	120	63	340	1	120	19	171	1	208	74	174	18	24	0	157	63	0	55	203	277	162	69	320	89	0	40	12	0	0	0	0	125	224	158	164	5	180	3	273	321	0	43	201	63	260	207	161
YDR075W	47	46	5	6	19	0	30	6	27	0	6	1	56	0	11	0	52	24	0	48	2	74	25	22	27	11	0	3	0	0	0	0	0	0	11	34	27	1	6	4	0	33	0	1	24	17	21	15	41
YDR076W	11	0	1	1	11	0	1	0	6	2	0	1	0	0	0	0	0	0	0	6	0	6	1	0	7	0	0	0	0	0	0	0	0	1	11	21	0	0	0	0	0	18	0	0	0	0	0	0	11
YDR077W	915	688	429	212	2372	5	972	687	812	28	697	393	3788	303	377	0	1452	623	0	2432	1208	827	419	812	1360	193	0	778	20	0	0	0	0	409	1054	2435	3585	31	676	35	478	492	9	841	1014	262	1896	455	293
YDR078C	98	68	29	16	49	0	77	49	56	0	35	40	62	16	23	0	157	48	0	188	152	68	53	57	66	9	0	8	1	7	0	0	0	22	36	65	133	0	20	6	82	67	0	33	23	9	117	47	23
YDR079W	108	91	45	13	139	0	77	23	53	0	55	34	126	12	33	0	82	21	0	51	83	98	42	54	122	34	0	17	0	0	0	0	0	37	115	94	67	1	37	5	50	76	0	117	85	12	60	57	77
YDR080W	47	46	22	11	62	0	25	12	87	3	24	12	30	8	8	0	59	66	0	35	13	72	48	47	35	12	0	11	0	1	0	0	0	17	47	59	64	0	31	2	12	44	0	8	90	3	60	26	42
YDR081C	45	41	22	3	82	0	35	15	58	0	10	23	102	1	12	0	35	29	0	25	47	74	32	52	50	17	0	13	0	0	0	0	0	21	64	66	64	1	16	2	20	53	0	65	100	10	48	34	95
YDR082W	18	18	12	8	35	1	40	10	85	0	20	16	43	2	1	0	51	19	0	8	15	18	27	37	14	4	0	10	2	0	0	0	0	10	61	11	38	3	10	0	0	34	0	29	59	0	49	13	19
YDR083W	55	67	6	1	13	0	113	66	34	9	2	15	197	1	12	0	33	82	0	47	5	90	35	85	24	0	0	15	0	0	0	0	0	6	11	121	133	0	3	6	10	50	0	27	25	1	39	16	55
YDR084C	93	116	45	48	193	0	134	46	125	12	58	55	331	10	23	0	110	101	0	21	76	213	78	135	101	15	0	25	2	0	0	0	0	49	143	179	149	2	56	6	39	99	0	42	112	40	120	76	96
YDR085C	13	25	31	21	42	0	5	5	113	0	4	10	35	0	3	0	51	14	0	17	15	29	8	7	39	0	0	12	1	0	0	0	0	19	52	48	28	0	15	0	52	7	0	0	59	23	23	10	22
YDR086C	493	355	161	92	625	5	1006	266	352	14	262	164	2089	108	152	0	594	806	1	771	388	555	340	615	521	125	2	242	6	0	0	0	0	188	398	1361	1000	9	242	18	188	513	0	399	490	139	452	277	352
YDR087C	52	27	2	0	20	0	184	79	30	13	13	5	330	7	20	0	35	90	0	87	20	120	42	69	38	3	0	36	0	0	0	0	0	10	34	279	150	0	22	15	0	48	0	10	51	6	59	24	70
YDR088C	23	12	10	6	14	1	39	20	33	0	15	5	39	2	7	0	36	17	0	24	23	38	12	25	21	1	0	0	0	0	0	0	0	9	37	43	52	0	37	4	10	17	1	2	36	5	12	18	34
YDR089W	147	89	67	64	323	2	67	19	426	1	58	54	204	11	21	0	116	49	0	34	110	160	70	86	92	38	0	10	1	0	0	0	0	59	212	96	123	0	99	1	94	196	1	57	250	51	78	55	93
YDR090C	170	155	20	4	42	0	31	11	86	1	57	17	76	3	5	15	96	25	0	65	222	309	120	77	131	22	0	4	1	0	0	0	0	20	91	52	45	0	27	0	25	178	0	29	97	6	107	80	249
YDR091C	73	60	4	0	13	0	101	40	12	5	18	4	286	0	29	0	62	73	0	101	45	139	37	54	32	9	0	24	0	0	0	0	0	10	22	217	151	2	45	7	24	91	0	34	74	7	43	33	50
YDR092W
YDR093W	71	67	43	19	45	1	144	32	93	7	33	12	362	9	18	0	126	150	0	95	49	146	62	181	64	18	0	21	0	0	0	0	0	19	197	289	308	0	58	35	36	125	0	81	118	29	95	82	106
YDR094W
YDR095C
YDR096W	50	44	22	15	76	0	8	7	60	2	17	7	54	7	4	0	111	9	0	8	61	40	37	30	61	19	0	5	0	0	0	0	0	31	48	56	30	0	16	0	35	51	0	9	66	29	55	43	45
YDR097C	10	33	8	8	54	0	32	15	12	2	10	14	84	4	5	0	47	41	0	23	12	25	6	68	25	5	0	12	1	0	0	0	0	4	9	73	71	0	27	0	3	38	0	31	44	12	37	29	32
YDR098C	102	70	46	10	179	0	147	26	177	0	21	52	409	25	28	0	193	97	0	171	78	91	68	183	104	31	0	51	1	0	0	0	0	39	111	363	275	5	91	3	36	99	0	28	214	19	85	35	90
YDR099W	459	417	153	83	733	5	342	117	265	10	272	171	856	62	97	0	415	292	4	345	513	645	406	627	509	156	0	93	8	18	0	0	0	217	457	651	487	25	338	28	156	588	4	283	311	127	447	207	462
YDR100W	124	115	82	35	241	2	85	31	141	1	54	72	144	17	45	0	187	45	0	98	158	147	100	72	171	8	0	7	1	0	0	0	0	60	140	73	73	2	65	15	38	142	0	82	111	23	100	104	109
YDR101C	123	114	4	6	53	0	245	126	29	38	15	24	478	14	37	0	62	187	0	147	73	171	39	114	52	27	0	74	0	0	0	0	0	4	35	647	370	4	26	19	0	130	0	65	76	10	134	44	117
YDR102C
YDR103W	18	25	6	0	38	0	16	5	57	3	0	4	64	4	0	0	35	18	0	1	6	28	19	27	11	5	0	4	0	0	0	0	0	11	12	33	22	1	0	0	0	26	0	0	35	3	25	6	14
YDR104C	21	49	8	2	56	0	27	10	74	2	25	9	46	7	0	0	54	8	0	21	72	67	53	56	50	8	0	8	0	0	0	0	0	19	61	54	26	0	9	4	22	35	0	52	63	24	37	12	45
YDR105C	62	38	32	20	43	0	41	9	70	2	22	16	75	2	6	0	74	39	0	81	97	84	32	114	58	23	0	12	0	0	0	0	0	17	21	67	58	2	15	4	47	49	0	49	85	13	24	45	36
YDR106W	7	5	4	1	5	1	0	5	16	0	4	1	7	0	0	0	5	3	0	5	3	2	3	0	4	7	0	0	0	0	0	0	0	3	0	11	20	0	0	0	0	15	0	0	19	0	0	0	0
YDR107C	35	31	8	9	48	0	19	10	38	7	23	15	30	5	6	1	62	13	0	2	41	72	22	26	15	8	0	1	0	0	1	0	0	4	26	30	15	2	7	0	52	47	0	18	36	4	27	20	61
YDR108W	28	22	14	2	36	0	29	6	14	0	18	9	51	4	8	0	61	11	0	7	25	60	41	29	18	18	0	9	0	0	0	0	0	9	51	50	31	0	31	5	23	19	0	16	35	5	43	21	38
YDR109C	26	47	15	16	4	2	19	10	37	7	12	4	90	6	7	0	46	9	0	5	36	65	26	40	42	0	0	8	0	0	0	0	0	5	55	58	24	0	4	0	18	54	0	21	35	1	50	18	27
YDR110W	40	42	9	2	28	0	35	19	63	3	13	6	65	7	10	0	38	28	0	68	23	90	23	34	18	5	0	9	1	0	0	0	0	7	44	69	19	0	12	0	9	61	0	8	10	4	23	23	68
YDR111C	156	125	104	79	179	24	253	112	456	115	113	104	372	35	57	131	193	177	19	136	115	175	133	205	138	72	32	49	11	16	39	51	42	100	337	278	152	44	129	167	120	148	94	60	366	86	95	122	162
YDR112W
YDR113C	107	99	49	24	196	1	126	21	131	9	59	36	193	9	14	0	179	63	0	21	76	118	65	122	103	16	0	14	0	0	0	0	0	39	149	151	112	2	64	11	94	143	0	61	168	40	156	74	108
YDR114C
YDR115W	108	71	78	25	232	0	138	44	154	7	53	60	231	7	36	0	95	105	0	33	106	137	69	64	95	16	0	45	0	0	0	0	0	69	147	165	180	1	80	9	94	93	0	93	154	67	86	56	76
YDR116C	37	39	28	14	54	0	49	25	24	7	30	12	107	7	4	0	44	42	0	50	7	85	22	39	29	6	0	22	1	0	0	0	0	14	44	84	81	2	28	0	2	48	0	26	34	21	151	58	40
YDR117C	43	26	13	10	75	0	59	17	99	0	12	31	128	6	19	0	57	40	0	41	46	56	30	64	42	11	0	12	0	0	0	0	0	37	80	107	68	3	42	12	44	31	0	18	55	15	37	14	27
YDR118W	6	6	11	7	59	1	10	0	9	0	1	13	41	6	2	0	12	12	0	24	34	15	8	7	14	6	0	2	0	0	0	0	0	8	27	41	35	2	27	0	16	12	0	2	27	9	1	12	17
YDR119W	86	44	11	2	38	0	87	20	0	10	31	8	120	4	15	0	78	39	0	54	33	102	29	26	37	8	0	6	0	0	0	0	0	4	28	54	78	1	17	13	46	86	0	41	44	7	74	40	66
YDR120C	82	33	5	2	54	0	149	50	34	8	12	14	340	11	19	0	27	103	0	76	33	73	48	80	42	8	0	38	0	0	0	0	0	1	42	391	169	1	25	14	25	66	0	79	89	3	68	24	69
YDR121W	56	52	16	11	50	0	145	48	83	7	19	21	365	14	25	0	67	76	0	76	39	78	37	102	30	20	0	31	5	0	0	0	0	18	79	197	192	1	33	6	75	65	0	73	150	17	84	22	77
YDR122W	73	87	74	43	296	0	54	14	179	1	59	56	143	25	8	0	261	23	0	62	69	157	98	71	165	33	0	19	0	0	0	0	0	53	179	98	122	1	37	1	114	97	0	66	250	38	90	62	131
YDR123C	0	1	0	0	0	0	1	0	0	1	0	0	5	0	0	0	0	0	0	3	2	1	2	6	0	0	0	0	0	0	0	0	0	0	0	0	0	0	0	0	0	3	0	1	0	0	0	0	0
YDR124W	0	7	0	0	0	0	0	1	3	0	2	1	0	0	0	0	7	0	0	1	0	1	2	7	10	0	0	0	0	0	0	0	0	5	7	0	0	0	0	0	0	3	0	0	0	3	0	0	0
YDR125C	0	0	0	2	3	0	0	0	0	0	0	0	0	0	0	0	0	1	0	0	5	0	2	1	3	0	0	0	0	0	0	0	0	0	0	0	0	0	0	0	0	0	0	0	0	0	0	0	0
YDR126W	28	12	2	1	22	0	15	3	22	0	7	2	9	0	8	0	20	11	0	40	10	7	13	31	7	0	0	2	0	0	0	0	0	1	40	21	25	0	14	0	18	12	1	2	36	0	6	7	13
YDR127W	424	424	78	62	334	2	252	77	158	24	157	103	503	89	195	0	226	247	0	244	527	607	349	498	414	61	0	142	6	0	0	0	0	92	278	495	457	9	112	5	97	445	0	577	277	72	464	205	399
YDR128W	45	44	21	4	26	0	28	20	128	4	17	20	102	5	17	0	78	18	0	19	33	83	50	61	59	18	0	12	0	0	0	0	0	20	76	76	38	2	7	0	22	65	0	11	93	11	29	15	42
YDR129C	286	291	161	106	631	5	355	102	428	29	194	133	872	56	69	0	599	246	0	206	445	413	299	594	456	86	0	89	2	0	0	1	0	154	448	654	497	12	198	18	214	348	0	148	552	109	369	205	312
YDR130C	24	8	19	18	14	0	4	3	83	3	5	11	23	1	6	0	50	10	0	5	51	31	18	20	20	1	0	12	0	0	0	0	0	16	79	32	19	0	23	0	24	26	0	7	57	13	7	35	8
YDR131C	17	17	9	4	70	0	8	10	54	2	14	10	34	0	5	0	55	23	0	21	11	64	38	33	60	4	0	3	1	0	0	0	0	17	76	35	31	0	10	2	56	40	0	31	72	7	45	10	45
YDR132C	13	9	17	1	25	0	14	6	39	0	12	17	40	1	0	0	21	21	0	9	9	26	23	22	22	0	0	7	0	0	0	0	0	4	21	31	15	2	6	0	43	24	0	7	26	4	33	15	24
YDR133C
YDR134C
YDR135C	166	171	55	43	354	2	332	117	385	13	141	70	1119	25	34	0	299	225	0	302	238	342	194	310	277	93	0	139	2	0	0	1	0	86	458	732	656	11	147	22	188	214	0	229	403	80	249	123	238
YDR136C
YDR137W	66	56	28	31	110	1	40	13	184	0	33	30	159	16	7	0	63	42	0	19	74	102	64	85	51	10	0	11	1	0	0	0	0	57	190	63	91	2	52	0	75	54	0	16	176	33	68	45	72
YDR138W	5	0	0	1	0	0	3	1	4	0	0	1	4	0	1	0	3	0	0	0	1	1	1	0	0	1	0	1	0	0	0	0	0	0	0	1	9	0	0	0	0	2	0	0	4	3	0	0	7
YDR139C
YDR140W	81	74	27	18	146	1	78	26	143	0	30	28	157	8	18	0	41	36	0	51	70	85	72	127	57	13	0	33	0	0	0	0	0	29	142	183	137	0	53	0	23	78	0	57	99	48	37	48	62
YDR141C	86	118	42	18	183	0	88	16	115	10	30	37	111	16	11	0	102	48	0	38	106	120	69	82	83	34	0	23	1	0	0	0	0	27	140	207	108	7	54	1	54	140	0	96	201	41	166	41	84
YDR142C	27	26	4	7	29	0	8	2	86	0	9	7	25	6	1	0	18	12	0	19	16	18	23	35	31	11	0	3	1	0	0	0	0	11	32	31	39	1	0	3	28	34	0	39	35	14	22	3	23
YDR143C	74	76	11	7	41	0	73	26	18	7	9	12	86	4	14	0	25	20	0	17	23	127	34	21	26	8	0	20	0	0	0	0	0	4	40	75	75	1	18	4	7	60	0	5	55	6	18	15	79
YDR144C	9	33	6	2	74	0	160	61	39	11	14	14	334	9	20	0	45	116	0	117	30	49	21	93	13	13	0	17	0	0	0	0	0	12	38	207	164	3	10	9	20	30	0	54	45	3	19	35	54
YDR145W	63	67	32	10	100	2	96	30	60	2	6	22	105	15	18	0	109	68	0	49	60	113	33	45	42	15	0	18	0	0	0	0	0	39	68	98	87	1	12	10	41	99	0	44	69	12	42	42	64
YDR146C	36	55	18	16	24	0	23	7	23	0	28	9	34	4	13	0	33	15	0	22	39	101	20	3	35	12	0	0	3	0	0	0	0	11	23	39	40	0	14	2	0	88	0	15	23	9	66	18	44
YDR147W	65	36	8	9	70	0	24	9	50	8	36	19	77	5	7	0	69	22	0	29	39	54	25	49	48	10	0	15	0	0	0	0	0	26	28	94	71	0	16	0	11	37	0	9	82	11	31	26	38
YDR148C	265	168	150	32	428	6	103	56	129	9	163	113	316	17	38	0	260	98	0	84	152	260	122	173	306	70	0	60	1	0	0	0	0	119	254	140	112	9	47	12	165	193	0	147	149	65	264	219	227
YDR149C
YDR150W	265	177	41	22	179	13	111	39	127	3	94	32	443	40	31	0	155	130	0	179	207	300	226	194	267	46	0	27	1	0	0	0	0	58	191	405	352	10	84	26	140	277	1	96	163	28	260	89	220
YDR151C	7	28	34	2	105	1	16	6	34	8	5	22	84	1	9	0	26	27	0	46	18	64	17	14	19	5	0	6	1	0	0	0	0	16	19	63	40	0	23	0	0	17	0	17	12	16	20	14	25
YDR152W	80	75	16	12	63	4	248	64	117	6	38	32	645	42	51	0	154	253	0	229	130	166	84	238	101	31	0	87	2	0	0	0	0	24	106	444	353	2	90	9	42	103	0	59	270	27	96	62	91
YDR153C	181	141	51	40	185	0	150	59	134	9	53	51	307	8	37	0	142	71	0	60	116	260	130	89	101	35	0	55	0	0	0	0	0	53	145	202	242	0	102	5	51	168	0	76	202	21	163	97	142
YDR154C
YDR155C	2965	2255	832	515	4054	28	6052	1082	3043	239	1408	1108	12886	637	757	9	3426	4070	0	3168	2264	3711	2456	3279	3926	768	0	1227	45	0	2	9	0	1106	2489	11395	7842	63	1466	337	1977	2798	5	2670	3071	837	2643	1621	2378
YDR156W	87	90	7	15	55	1	171	53	88	10	14	26	473	22	30	0	102	99	0	163	67	153	51	114	62	19	0	42	1	0	0	0	0	31	124	339	338	6	97	11	52	91	1	79	92	6	60	45	117
YDR157W
YDR158W	761	663	134	81	672	4	388	72	222	11	257	184	993	142	395	4	296	382	0	662	768	1174	489	920	812	68	1	186	15	0	1	0	0	184	417	663	637	19	182	28	51	848	3	849	334	114	580	296	684
YDR159W	83	43	5	10	57	0	65	18	39	4	17	25	71	12	8	0	51	48	0	23	33	65	18	53	59	21	0	10	1	0	0	0	0	13	69	140	90	1	17	7	62	69	0	25	57	20	104	27	39
YDR160W	71	19	10	1	57	0	19	3	75	1	15	23	55	1	1	0	45	9	0	4	43	43	51	27	49	8	0	10	0	0	0	0	0	16	24	30	17	0	0	3	4	46	0	10	30	9	81	13	83
YDR161W	60	79	4	2	28	0	251	55	99	7	16	12	525	5	18	0	53	153	0	140	54	108	36	176	74	12	1	52	1	0	0	0	0	18	65	416	353	2	37	1	19	51	0	37	168	12	61	25	73
YDR162C	60	46	32	25	53	0	88	30	138	17	50	25	225	7	18	0	61	53	0	62	74	61	34	76	62	9	0	32	0	0	0	0	0	34	122	140	86	9	39	4	17	55	0	47	228	34	44	60	40
YDR163W	27	24	17	12	34	0	26	14	34	1	23	13	54	2	8	0	49	13	0	58	17	30	19	39	29	5	0	5	1	0	0	0	0	14	27	75	41	3	5	2	5	43	0	17	18	7	52	7	19
YDR164C	61	49	14	9	63	0	35	23	74	5	30	8	97	10	9	0	77	12	0	32	40	83	39	49	34	1	0	8	0	0	0	0	0	17	43	86	43	4	23	0	34	66	3	5	35	7	30	30	36
YDR165W	130	90	1	2	62	1	163	86	34	9	18	9	400	1	27	0	50	124	0	128	28	231	62	136	33	17	0	32	1	0	0	0	0	9	64	306	245	2	34	13	28	106	0	29	69	23	30	13	98
YDR166C	77	44	17	6	87	0	24	12	35	1	29	12	96	6	10	0	64	33	0	72	28	77	45	87	67	12	0	12	0	0	0	0	0	32	50	97	75	5	3	4	13	68	0	54	51	13	71	18	53
YDR167W	96	87	29	20	103	0	144	43	158	4	55	35	390	12	50	0	110	87	0	93	69	82	94	101	121	7	0	34	1	0	0	0	0	21	151	288	206	7	45	12	48	123	0	135	114	26	72	46	104
YDR168W	121	51	59	20	157	5	204	47	149	13	64	71	406	23	17	0	110	112	0	78	76	110	83	136	118	34	0	44	2	0	0	0	0	63	168	262	191	5	112	11	46	125	0	48	189	65	85	84	102
YDR169C	56	44	20	9	42	3	30	3	47	3	3	10	50	0	1	0	31	11	0	35	58	72	13	54	25	3	0	4	3	0	0	0	0	28	23	35	18	1	10	3	4	52	0	7	65	10	12	6	42
YDR170C	286	236	52	39	377	4	367	80	279	10	129	54	798	31	66	0	366	232	0	265	181	358	211	364	343	100	0	102	0	0	0	0	0	58	287	717	612	4	168	17	114	271	0	136	248	68	216	158	325
YDR171W	140	123	82	28	151	3	52	2	258	2	130	46	67	5	5	0	163	21	0	31	157	126	137	84	297	59	0	10	3	0	0	0	0	72	138	72	82	5	345	15	146	146	0	27	121	74	154	97	95
YDR172W	333	263	33	22	241	0	538	199	197	32	75	75	958	40	79	0	193	402	0	296	194	360	197	436	181	44	0	120	2	0	0	0	0	61	250	774	621	14	147	27	105	344	0	220	188	39	360	129	289
YDR173C	24	36	7	1	43	0	27	13	19	0	15	7	38	2	4	0	46	23	0	49	17	34	27	17	37	3	0	4	0	0	0	0	0	10	15	29	26	1	6	0	30	31	0	5	20	18	30	23	19
YDR174W	699	557	245	138	757	8	889	237	509	32	202	284	1572	120	175	1	735	690	0	376	436	788	426	881	493	111	0	121	2	0	3	1	0	303	860	1187	903	22	442	81	269	707	1	663	868	244	381	381	557
YDR175C	50	44	21	11	99	0	86	13	74	7	23	25	146	12	23	0	108	37	0	51	66	44	31	63	57	22	0	20	0	0	0	0	0	22	89	61	94	4	53	2	20	56	1	84	77	19	75	42	51
YDR176W	71	76	22	17	72	0	66	10	43	9	23	15	113	10	7	0	49	66	0	61	107	97	82	71	85	21	0	6	0	0	0	0	0	14	45	123	88	6	45	1	8	60	0	12	86	10	81	26	68
YDR177W	100	75	60	30	165	0	215	59	166	7	65	76	411	36	48	0	154	115	0	168	146	192	115	184	134	41	0	55	1	0	0	0	0	59	153	373	276	2	104	15	184	122	0	134	196	40	126	87	110
YDR178W	241	267	172	14	193	0	62	12	50	10	174	57	153	19	34	0	224	40	0	34	192	308	109	119	197	74	0	30	1	0	0	0	0	53	119	90	61	0	47	4	65	285	0	67	113	71	242	132	203
YDR179C	37	71	17	3	30	0	31	4	46	1	9	20	79	0	6	0	13	39	0	32	26	47	25	57	51	20	0	6	0	0	0	0	0	16	18	43	35	1	34	2	3	85	0	4	35	15	23	44	51
YDR180W	35	20	3	1	50	1	65	14	22	0	20	11	83	1	16	0	16	17	0	41	53	39	23	45	22	4	0	17	0	0	0	0	0	2	34	44	75	1	14	0	5	46	0	44	30	1	6	10	28
YDR181C	38	21	12	9	82	0	40	10	40	3	10	12	39	3	6	0	32	24	0	45	62	72	23	60	39	11	0	12	0	0	0	0	0	15	24	37	65	0	17	4	16	42	0	53	58	8	53	26	59
YDR182W	96	85	53	16	247	0	114	20	83	1	59	35	284	10	27	0	153	72	0	56	160	92	101	87	82	46	0	24	0	0	0	0	0	46	89	201	152	6	56	7	41	126	0	58	104	42	104	70	88
YDR183W	46	25	19	2	72	0	50	7	59	0	12	19	104	9	4	0	59	29	0	53	48	42	26	131	20	17	0	12	8	0	0	0	0	21	61	16	77	1	6	2	17	33	0	19	52	10	9	17	32
YDR184C	31	45	1	0	26	0	82	36	18	5	1	7	158	1	7	0	23	33	0	53	17	64	11	62	26	6	0	12	1	0	0	0	0	0	39	121	60	1	46	6	9	39	0	18	29	1	41	7	47
YDR185C	8	7	4	3	7	0	6	0	32	0	3	6	20	3	2	0	0	4	0	7	10	5	5	9	13	11	0	0	0	0	0	0	0	1	21	3	3	0	0	0	16	19	0	3	33	5	4	1	1
YDR186C	129	113	24	5	97	3	72	35	54	5	27	6	137	5	19	0	45	57	0	73	115	157	92	38	165	26	0	24	1	0	0	0	0	28	60	148	120	3	51	1	89	163	0	78	98	6	134	59	157
YDR187C
YDR188W	167	205	50	35	315	2	357	120	275	28	89	73	1009	32	55	1	298	259	0	304	152	308	160	269	185	67	0	59	1	0	0	0	0	71	265	704	452	3	136	19	102	246	0	192	260	66	100	88	245
YDR189W	55	87	45	20	130	0	168	52	173	5	48	48	315	11	24	2	146	72	0	86	159	125	84	149	70	16	0	30	2	0	0	0	0	43	168	241	191	2	95	1	52	99	0	61	100	35	75	58	117
YDR190C	81	99	22	11	129	1	187	61	103	2	27	24	510	19	53	0	123	119	0	152	73	165	106	149	95	10	0	53	0	0	0	0	0	38	162	474	378	6	65	2	33	101	0	82	147	26	119	45	92
YDR191W	15	17	5	9	8	0	8	3	24	0	2	2	14	0	9	0	9	5	0	8	26	27	10	2	21	4	0	6	0	0	0	0	0	3	10	20	27	0	1	1	1	25	0	14	20	2	5	11	23
YDR192C	41	31	9	5	14	0	35	10	16	0	9	1	64	1	14	0	11	30	0	17	17	24	11	47	30	5	0	10	1	0	0	0	0	5	12	39	58	0	5	0	16	23	0	2	25	5	38	23	29
YDR193W
YDR194C	46	53	23	10	77	0	77	40	35	12	24	25	120	1	19	0	40	39	0	110	33	101	15	53	25	10	0	28	2	1	0	0	0	25	41	75	108	8	6	14	11	81	0	115	74	22	70	33	44
YDR195W	71	64	14	10	40	0	46	25	91	4	12	11	96	2	5	0	66	38	0	9	41	74	63	35	48	6	0	16	0	0	0	0	0	9	48	68	88	0	35	2	26	66	0	42	65	14	71	22	47
YDR196C	51	77	84	29	178	0	57	11	219	9	31	96	118	15	18	0	155	61	0	42	52	74	60	101	82	16	0	14	0	0	0	0	0	71	138	49	51	2	67	0	62	85	0	67	153	21	91	57	55
YDR197W	40	43	22	1	57	0	34	11	72	1	19	6	61	2	9	0	33	10	0	31	22	69	48	44	48	14	0	13	1	0	0	0	0	20	62	44	56	0	9	0	60	37	0	10	61	12	62	34	21
YDR198C	27	18	2	3	32	0	23	13	32	3	31	8	96	5	8	0	44	15	0	34	24	47	29	18	50	4	0	13	1	0	0	0	0	7	41	82	49	0	13	0	22	62	0	39	36	8	31	26	46
YDR199W
YDR200C	96	50	20	21	106	4	49	20	99	1	31	16	85	5	18	0	43	31	0	40	74	106	46	101	58	15	0	14	1	0	0	0	0	29	88	73	54	7	33	4	46	71	0	15	45	20	58	43	72
YDR201W	61	53	30	12	100	0	95	11	87	6	26	7	113	2	16	0	70	76	0	59	50	76	34	61	51	12	0	10	11	0	0	0	0	10	42	123	71	2	19	5	22	48	0	30	54	14	56	39	43
YDR202C	34	53	41	27	102	2	53	15	187	0	27	39	102	0	18	0	88	21	0	32	48	58	30	96	101	22	0	16	0	0	0	0	0	45	189	98	55	3	58	1	77	39	0	21	132	28	94	33	34
YDR203W
YDR204W	101	106	106	51	462	4	65	14	384	1	45	90	211	30	22	0	354	58	0	68	72	154	139	203	162	53	0	20	0	0	0	0	0	100	255	139	109	3	113	1	271	103	0	59	386	49	71	60	86
YDR205W	37	31	8	10	78	0	19	2	30	2	12	8	84	6	6	0	20	35	0	24	8	55	27	27	29	11	0	11	0	0	0	0	0	5	38	74	77	3	13	2	40	34	0	46	54	17	66	30	36
YDR206W	46	51	10	12	63	0	69	15	16	1	23	20	115	3	12	0	48	19	0	34	74	84	38	43	40	3	0	16	0	0	0	0	0	11	42	69	31	0	13	2	38	76	0	46	40	6	12	21	67
YDR207C	59	51	8	10	48	0	98	22	52	4	22	20	131	4	12	0	47	80	0	16	75	96	46	15	49	24	0	7	2	0	0	0	0	11	33	131	113	4	41	7	3	101	0	12	62	6	50	29	76
YDR208W	221	205	23	26	160	0	143	33	60	15	114	14	297	12	25	0	70	79	0	80	217	292	149	138	128	47	0	47	1	0	0	0	0	35	87	142	171	15	41	10	16	299	0	31	80	36	160	114	228
YDR209C
YDR210W
YDR211W	68	86	16	12	78	0	146	54	104	13	32	31	422	16	18	0	107	127	0	185	61	187	78	118	73	27	0	26	1	0	0	0	0	34	121	426	295	7	69	8	5	143	0	76	151	10	108	46	123
YDR212W	117	96	22	26	113	2	235	56	80	27	23	27	359	8	52	5	143	125	1	175	69	182	96	222	126	12	0	38	1	0	0	0	0	54	88	256	219	4	44	20	56	141	0	33	93	17	104	37	109
YDR213W	18	7	9	2	22	0	27	12	102	6	2	2	35	4	2	3	22	19	0	46	11	28	4	22	29	0	2	5	2	2	0	0	2	5	23	38	18	3	9	0	24	32	2	0	39	0	8	7	36
YDR214W	175	137	44	8	151	2	339	74	153	11	115	63	860	9	19	0	122	248	0	144	235	247	143	196	239	55	0	91	3	0	0	0	0	44	94	588	444	5	93	13	84	192	0	127	104	21	198	137	163
YDR215C
YDR216W	21	10	3	0	2	0	0	0	0	0	10	2	34	0	0	0	17	6	0	19	25	19	7	20	14	3	0	4	0	0	0	0	0	0	1	33	9	0	13	1	0	24	0	11	7	0	3	0	28
YDR217C	42	16	2	0	22	0	107	19	24	4	19	20	104	3	2	0	39	47	0	28	38	99	49	133	49	10	0	6	0	0	0	0	0	14	44	77	79	1	20	1	13	115	0	23	55	0	55	8	54
YDR218C	0	0	2	0	0	0	0	0	0	0	1	1	7	0	0	0	0	0	0	1	0	0	2	0	0	0	0	0	0	0	0	0	0	0	0	0	0	0	0	0	0	1	0	5	15	0	0	0	0
YDR219C	48	40	32	8	22	0	29	4	41	1	34	24	104	5	4	0	68	17	0	13	70	62	42	23	43	13	0	4	1	0	0	0	0	28	64	52	27	0	32	3	41	46	0	27	61	9	82	52	21
YDR220C
YDR221W	13	25	7	3	57	0	12	2	31	1	7	14	88	7	11	0	65	11	0	32	9	26	14	61	12	8	0	4	0	0	0	0	0	15	41	53	24	0	11	1	74	18	0	35	81	2	30	10	11
YDR222W	8	15	0	0	0	0	22	8	18	0	2	7	40	0	3	0	10	13	0	13	19	10	0	6	6	1	0	8	0	0	0	0	0	0	10	50	16	0	0	0	4	23	0	6	10	1	27	0	7
YDR223W	4	4	1	1	28	0	0	0	22	0	0	0	0	0	0	0	4	0	0	0	0	9	0	0	0	0	0	0	0	0	0	0	0	0	0	0	0	0	0	0	32	1	0	1	7	5	0	0	4
YDR224C	1914	1656	350	146	1199	33	1933	803	494	169	618	489	3085	202	570	0	854	1597	1	1038	1670	2291	1045	1698	1354	330	1	243	11	3	4	2	1	467	682	1846	1282	37	575	165	538	2212	4	681	645	359	2321	1060	2053
YDR225W	1502	1334	281	161	878	7	1592	406	606	67	628	295	2051	114	266	0	860	1215	0	895	1256	1936	748	1069	869	379	0	93	11	0	0	0	1	369	433	932	768	28	207	106	457	1755	2	531	628	236	1403	1003	1468
YDR226W	706	461	122	65	473	1	1007	262	139	66	269	178	1597	89	178	0	415	542	0	518	308	1055	306	341	476	156	0	198	4	0	0	0	0	147	262	1231	823	19	169	80	61	741	0	323	276	146	379	355	712
YDR227W	43	66	8	3	48	7	24	9	38	2	18	8	76	10	5	2	64	22	0	7	47	57	40	15	33	6	0	7	1	0	0	1	0	13	51	33	37	0	3	0	10	49	0	3	71	12	51	23	56
YDR228C	33	56	14	11	59	1	40	11	74	2	10	11	96	10	6	0	44	42	0	4	42	55	28	54	34	12	0	3	0	1	0	0	0	14	67	71	60	1	12	2	49	38	0	4	67	13	73	27	34
YDR229W	28	29	21	7	27	2	25	13	107	1	17	20	89	1	7	0	31	33	0	11	32	55	42	11	73	9	0	8	1	0	0	0	0	9	74	100	70	1	18	0	63	36	0	22	46	9	73	49	40
YDR230W
YDR231C	62	54	94	48	272	1	41	13	190	11	66	77	121	6	25	0	128	30	0	38	46	81	54	33	99	7	0	16	0	0	0	0	0	66	252	81	35	4	79	7	161	45	0	28	254	62	93	52	42
YDR232W	135	122	37	24	107	0	118	56	76	1	38	24	228	4	27	0	96	95	1	91	119	259	41	105	36	12	0	14	3	0	3	4	0	41	63	178	105	0	36	16	89	172	1	58	114	23	142	55	186
YDR233C	385	368	63	53	312	8	712	264	222	7	137	105	1128	54	128	0	411	350	0	484	464	603	243	382	305	79	0	101	5	0	0	3	3	63	216	912	896	8	86	34	151	423	0	254	216	77	430	226	437
YDR234W	406	273	58	66	379	6	238	32	291	25	107	79	490	30	213	0	128	183	0	152	357	531	161	393	296	52	0	40	13	0	0	0	0	119	348	395	286	4	55	46	26	404	0	502	324	113	275	191	466
YDR235W	42	63	28	7	75	0	36	12	86	0	17	14	78	4	6	0	79	21	0	27	15	55	42	46	44	6	0	15	1	0	0	0	0	22	49	79	52	0	27	0	15	22	0	28	64	21	53	21	45
YDR236C	82	56	101	49	353	0	76	30	201	0	50	63	290	16	25	0	208	58	0	64	160	124	95	139	91	11	0	9	1	0	0	0	0	73	283	147	128	4	44	6	97	96	1	114	184	51	172	37	62
YDR237W	55	31	33	10	83	0	65	21	54	0	26	23	200	5	12	0	65	50	0	49	40	40	56	22	32	10	0	25	0	0	0	0	0	44	66	106	98	1	6	1	17	32	0	42	46	12	138	55	27
YDR239C	35	36	10	15	66	0	44	20	47	2	32	11	188	7	7	0	52	35	0	36	67	66	36	103	51	17	0	11	0	0	0	0	0	16	110	164	137	0	20	5	48	78	0	34	71	23	80	32	43
YDR240C	16	14	7	1	23	0	11	5	10	1	12	4	58	1	2	0	0	13	0	2	0	18	16	34	17	3	0	1	0	0	0	0	0	13	8	9	24	0	1	0	14	13	0	0	44	6	18	4	7
YDR241W
YDR246W	25	37	13	8	43	1	39	9	47	1	1	18	138	12	8	0	16	24	0	27	53	66	24	43	22	4	0	13	0	0	0	0	0	16	75	70	40	1	6	4	8	40	0	8	62	10	23	35	53
YDR247W	13	17	5	4	0	0	0	0	27	0	5	1	0	0	5	0	1	1	0	0	0	8	1	5	1	4	0	0	0	0	0	1	0	1	6	10	1	0	8	1	0	11	0	0	0	0	0	2	15
YDR248C	88	53	103	33	401	1	34	24	177	3	55	93	126	18	41	0	188	25	0	40	89	72	49	138	45	12	0	11	1	0	0	0	0	96	171	55	57	4	20	5	68	51	0	83	195	34	49	72	54
YDR249C	19	25	15	1	5	0	17	5	23	2	10	5	25	1	2	0	17	7	0	12	20	20	17	30	22	2	0	1	0	0	0	0	0	5	46	25	24	0	3	7	21	18	0	0	32	14	8	22	36
YDR250C
YDR251W	85	86	63	23	192	0	80	25	246	1	48	40	99	4	22	0	230	40	0	33	87	90	59	118	96	51	0	10	3	0	0	0	0	73	153	161	119	3	38	5	105	93	0	28	217	61	112	52	93
YDR252W	3	0	7	0	14	0	3	0	15	2	0	5	0	5	5	0	14	8	0	0	11	3	8	9	4	0	0	0	0	0	0	0	0	18	27	2	0	0	7	0	53	2	0	15	29	6	0	2	2
YDR253C	95	85	427	185	813	1	16	4	698	0	37	185	30	18	24	0	390	10	0	1	87	98	63	154	121	13	0	2	1	0	0	0	0	204	807	14	9	6	96	1	546	76	1	56	1078	135	70	39	64
YDR254W	63	46	110	27	177	1	17	6	138	2	32	60	22	9	7	0	167	14	0	28	27	78	47	74	42	10	0	5	0	0	0	0	0	32	131	31	60	6	28	3	50	59	0	22	152	30	18	28	40
YDR255C	16	10	24	12	46	0	18	1	28	0	7	12	1	0	4	0	20	1	1	7	4	23	15	4	10	3	0	0	0	0	0	0	0	9	14	0	9	0	11	2	12	21	2	0	21	20	0	10	24
YDR256C	0	6	6	0	0	0	3	2	5	0	7	5	9	0	0	0	25	0	0	2	14	3	3	9	7	4	0	2	0	0	0	0	0	4	2	13	0	1	0	0	48	6	0	0	23	3	11	11	3
YDR257C	23	24	40	13	57	0	44	14	89	1	20	19	116	19	25	0	113	34	0	30	21	19	11	84	28	14	0	11	1	0	0	0	0	18	108	72	106	1	37	3	25	39	0	56	54	7	31	14	47
YDR258C	138	102	28	8	89	3	41	14	73	3	99	18	177	8	7	0	28	24	0	53	123	153	123	43	315	60	0	41	9	0	0	0	0	23	74	210	110	4	99	10	52	115	0	94	36	33	115	68	85
YDR259C	17	29	42	9	38	0	7	8	33	0	20	36	45	2	7	0	25	7	0	17	46	35	28	6	8	12	0	2	0	0	0	0	0	29	66	30	8	0	4	0	3	28	0	50	53	14	29	16	35
YDR260C	3	3	1	0	11	0	10	0	11	0	0	3	13	0	0	0	20	5	0	21	0	6	0	12	5	0	0	1	0	0	0	0	0	1	20	9	11	0	1	6	0	1	0	0	2	10	0	0	9
YDR261C	109	78	51	40	212	2	140	42	258	8	36	50	335	23	27	0	227	116	0	141	78	96	64	143	80	32	0	49	2	0	0	0	0	43	213	330	205	4	84	8	56	96	0	74	236	28	112	46	91
YDR262W	99	117	31	18	154	1	54	22	96	0	99	34	111	5	16	0	183	46	0	70	174	184	118	51	169	13	0	25	0	0	0	0	0	35	90	89	58	1	15	0	109	191	0	32	100	17	150	77	191
YDR263C	26	51	11	3	69	0	9	3	36	0	15	17	62	0	6	0	35	6	0	20	63	73	19	31	26	6	0	12	0	0	0	0	0	10	10	63	24	1	6	4	24	74	0	15	81	13	51	10	24
YDR264C	140	132	44	25	181	1	73	18	173	1	55	44	203	2	31	0	198	65	0	83	116	179	74	164	103	34	0	36	3	0	0	0	0	39	159	202	111	6	43	12	70	108	0	72	221	39	72	24	147
YDR265W	50	50	30	17	66	0	26	2	112	0	9	14	49	5	7	0	95	5	0	29	49	56	42	36	52	4	0	7	0	0	0	0	0	33	117	39	50	4	8	0	20	57	0	28	93	19	66	20	48
YDR266C	67	72	25	23	74	1	112	26	69	4	23	11	223	9	14	0	76	82	0	45	101	121	77	64	46	8	0	22	2	0	0	0	0	7	71	159	163	2	44	9	12	105	0	45	136	19	64	17	86
YDR267C	36	44	34	13	93	0	89	23	83	1	13	36	146	8	11	0	38	40	0	36	59	104	33	108	60	4	0	21	0	0	0	0	0	39	129	138	85	2	32	1	58	49	0	55	146	16	66	39	77
YDR268W	27	20	14	4	53	0	34	6	69	2	19	21	63	7	9	0	47	21	0	4	38	18	21	44	30	5	0	10	0	0	0	0	0	15	43	29	34	0	19	0	50	9	0	18	26	14	30	12	27
YDR269C
YDR270W	56	16	13	13	21	0	45	1	35	0	10	8	59	2	11	0	13	14	0	33	77	81	37	23	54	14	0	10	1	0	0	0	0	7	13	36	26	0	6	0	64	42	0	22	65	10	90	16	60
YDR271C
YDR272W	152	111	67	23	247	1	115	34	211	7	78	78	279	22	18	0	173	71	0	72	154	158	136	144	197	31	0	18	0	0	0	0	0	73	215	212	158	4	113	23	164	136	0	33	186	61	180	92	84
YDR273W	6	4	9	0	21	0	12	2	44	1	7	1	2	4	1	0	9	4	0	6	23	15	14	34	15	7	0	2	1	0	0	0	0	0	13	44	26	1	12	0	21	2	0	0	45	4	1	19	8
YDR274C
YDR275W	102	69	18	14	26	0	37	29	92	0	53	24	82	11	2	0	51	24	1	32	81	97	106	38	142	38	0	5	1	0	0	0	0	14	69	83	56	0	37	1	38	94	0	29	81	13	92	53	60
YDR276C	906	811	382	118	1044	6	836	262	431	25	506	616	1424	109	399	0	1958	380	0	656	1104	1325	551	766	748	219	0	143	9	0	3	0	2	377	569	1100	742	16	326	14	471	914	2	561	546	332	927	598	746
YDR277C	81	59	54	23	75	0	5	4	65	4	29	7	101	3	14	0	43	7	0	7	55	74	34	5	57	30	0	6	0	0	0	0	0	6	5	17	43	4	33	0	10	59	0	25	12	2	26	26	128
YDR278C
YDR279W	12	21	10	9	13	0	18	1	17	0	5	1	37	0	0	0	23	18	0	24	5	14	0	22	11	0	0	1	0	0	0	0	0	19	12	24	8	0	9	7	17	8	0	12	16	3	0	15	18
YDR280W	73	53	26	14	74	0	168	77	132	2	19	41	350	9	28	0	96	105	0	96	54	123	69	137	69	45	0	30	2	0	0	0	0	34	108	253	151	5	71	5	37	123	0	48	108	33	64	49	65
YDR281C	32	15	0	0	16	0	17	0	8	0	19	0	54	0	3	0	25	15	0	14	6	58	14	36	26	0	0	0	0	0	0	0	0	0	44	267	7	2	30	0	0	33	0	5	18	0	15	8	37
YDR282C	20	14	9	3	23	0	6	5	43	0	6	9	35	6	1	0	37	10	0	9	20	28	15	13	18	3	0	6	0	0	0	0	0	3	21	35	12	0	9	0	0	11	0	0	54	10	14	0	9
YDR283C	111	111	38	37	115	7	97	30	230	6	75	50	240	29	22	0	164	51	0	81	147	136	107	150	136	38	0	30	2	0	0	0	0	24	164	191	124	1	56	11	58	167	0	33	162	41	155	51	161
YDR284C	134	160	77	36	200	4	78	16	307	2	92	60	209	23	39	0	227	62	0	52	251	166	140	180	202	68	0	20	3	0	0	0	0	57	234	171	145	1	86	7	54	148	0	68	244	46	138	139	141
YDR285W	6	7	7	0	8	0	8	0	5	0	2	14	10	1	0	0	21	8	0	0	15	5	1	14	7	2	0	0	0	0	0	0	0	3	21	1	4	0	1	0	3	9	0	3	15	0	21	21	4
YDR286C	34	21	30	17	50	0	40	10	68	1	12	20	74	3	18	0	87	35	0	23	21	76	32	30	39	8	0	5	0	0	0	0	0	15	55	51	56	0	1	5	44	41	0	4	29	31	40	6	25
YDR287W	28	23	25	15	60	0	11	7	51	0	14	24	46	5	16	0	100	3	0	5	20	37	26	52	28	6	0	5	0	0	0	0	0	22	68	45	19	4	27	0	44	25	0	9	43	23	28	21	31
YDR288W	72	34	24	17	135	0	20	8	54	0	16	18	68	2	18	0	69	30	0	31	20	64	53	33	53	8	0	7	0	0	0	0	0	23	28	60	51	1	13	0	45	54	0	5	69	15	70	32	36
YDR289C	26	28	16	12	28	0	30	15	24	6	6	3	74	9	6	0	40	36	0	37	18	37	18	36	41	18	0	7	0	0	0	0	0	17	35	43	43	1	31	2	27	32	0	34	28	8	5	12	30
YDR290W
YDR291W	30	45	16	10	58	0	39	13	94	0	21	25	63	4	7	0	54	26	0	44	25	58	25	50	34	27	0	14	0	0	0	0	0	11	97	104	29	2	35	0	7	40	0	15	103	18	25	21	41
YDR292C	103	84	24	9	142	0	112	38	63	10	44	46	307	3	32	0	168	63	0	111	53	129	55	80	77	18	0	23	0	0	0	0	0	28	96	177	130	2	26	3	42	62	0	35	86	33	52	35	73
YDR293C	111	95	37	22	148	0	58	25	74	7	48	23	173	15	8	0	158	52	0	73	78	166	70	48	136	9	0	25	2	0	0	0	0	39	101	161	111	2	38	5	68	128	0	70	116	34	84	56	86
YDR294C	125	79	81	49	375	0	144	44	214	12	63	67	467	36	32	0	218	120	0	52	175	154	109	204	138	30	0	62	0	2	0	0	0	95	287	292	289	1	100	22	161	123	1	132	260	59	136	92	91
YDR295C	34	38	12	8	57	0	30	21	64	3	34	3	42	6	10	0	31	27	0	25	41	60	23	30	47	7	0	7	1	0	0	0	0	5	65	68	37	2	19	2	7	47	0	47	13	11	67	21	44
YDR296W	81	38	47	33	193	0	123	22	105	3	53	44	310	10	30	0	140	94	0	95	69	114	89	115	83	24	0	47	1	0	0	0	0	44	100	204	113	3	54	8	108	65	0	61	176	33	88	54	69
YDR297W	188	144	24	20	98	1	127	24	132	6	75	21	372	21	27	0	151	119	0	130	138	162	112	187	133	34	0	29	5	0	0	0	0	13	126	277	257	5	141	6	18	287	0	35	95	16	91	68	251
YDR298C	232	181	108	34	323	0	96	39	116	20	110	105	187	5	50	0	251	64	1	89	114	317	109	144	204	69	0	43	2	0	0	6	0	56	132	103	81	1	42	4	119	185	0	88	73	67	202	165	151
YDR299W	72	59	8	4	38	0	78	40	6	5	11	22	223	6	19	0	57	73	0	55	51	99	40	41	25	2	0	29	0	0	0	0	0	6	65	170	116	0	9	7	0	75	0	37	25	11	22	17	37
YDR300C	29	23	4	4	25	0	68	30	1	2	20	9	120	10	10	0	15	41	0	59	42	68	25	40	37	3	0	18	1	0	0	0	0	2	20	100	75	0	12	9	0	50	0	4	32	2	9	12	38
YDR301W	45	51	17	16	37	0	87	9	65	6	19	13	153	16	7	0	142	47	0	50	81	92	58	126	67	22	0	19	0	0	0	0	0	26	101	168	126	4	42	1	51	69	0	30	147	13	49	27	52
YDR302W	52	36	26	7	76	0	114	19	52	2	25	16	136	18	17	0	66	73	0	26	31	40	27	51	33	3	0	26	0	0	0	0	0	14	71	122	69	3	25	3	18	54	0	47	26	8	69	12	27
YDR303C	47	50	36	18	66	0	48	15	59	1	18	19	156	9	16	0	57	49	0	41	35	71	63	58	92	8	0	11	0	0	0	0	0	32	107	163	82	3	50	3	36	74	0	42	90	8	70	26	53
YDR304C	273	241	121	59	445	3	401	91	240	33	162	166	1058	89	79	0	470	312	0	251	363	356	349	366	415	91	0	112	4	0	0	0	0	121	355	857	554	19	181	26	218	250	1	215	388	112	370	232	245
YDR305C	47	37	22	12	94	0	52	22	46	0	33	20	84	17	10	0	59	38	0	41	33	49	56	39	58	13	0	7	1	0	0	0	0	23	62	68	35	2	34	4	34	54	0	28	67	27	61	48	38
YDR306C	27	20	9	5	29	0	9	7	37	0	18	12	37	1	6	0	33	9	0	25	31	47	56	26	40	14	0	4	0	0	0	0	0	10	64	27	31	2	1	3	30	45	0	0	11	3	35	20	28
YDR307W	56	28	25	8	77	1	50	17	38	1	31	27	98	1	4	0	69	38	0	58	30	41	40	45	69	18	0	11	0	0	0	0	0	8	56	81	57	1	21	3	17	39	0	30	75	21	19	17	42
YDR308C	35	38	26	14	72	0	53	20	74	0	33	29	127	7	10	0	36	44	0	71	46	83	41	76	61	16	0	8	0	0	0	0	0	29	60	65	25	1	8	8	44	37	0	21	58	10	65	27	64
YDR309C	88	70	13	5	79	0	39	10	79	2	57	14	163	4	8	0	199	43	0	55	92	128	71	91	75	27	0	14	1	1	0	0	0	21	61	148	85	5	19	3	47	116	2	2	70	14	152	49	126
YDR310C	126	73	20	11	137	0	163	30	123	3	31	26	334	6	30	1	89	108	0	51	133	111	92	112	116	24	0	26	3	0	0	0	0	45	110	296	241	2	78	8	46	120	1	71	151	23	85	53	94
YDR311W	113	48	19	21	165	0	57	15	159	0	14	23	85	6	16	0	120	32	0	70	104	113	64	34	40	7	0	14	1	0	0	0	0	19	192	117	53	4	47	5	74	81	0	16	118	21	41	20	68
YDR312W	106	90	11	11	73	1	179	72	69	9	48	27	314	9	24	0	52	124	0	90	53	201	49	130	97	8	0	37	1	0	0	0	0	11	95	343	202	1	17	5	38	180	0	30	168	15	119	33	123
YDR313C	47	47	8	10	48	0	19	2	63	1	37	11	35	1	2	0	70	10	0	30	54	87	30	27	71	6	0	3	0	0	0	0	0	27	36	33	10	0	14	0	7	48	0	10	127	16	15	39	81
YDR314C	6	2	2	0	4	0	0	0	0	0	5	3	8	0	0	0	8	0	0	0	10	10	0	0	3	2	0	0	0	0	0	0	0	3	19	5	15	0	0	0	6	5	0	2	14	0	10	0	10
YDR315C	18	23	24	0	20	0	8	7	30	0	25	13	14	3	4	0	55	16	0	7	17	44	31	13	32	5	0	2	0	0	0	0	0	18	30	13	3	0	41	0	0	18	0	16	34	14	13	12	43
YDR316W	28	22	28	5	93	0	22	10	10	0	17	11	79	12	18	0	34	12	0	23	74	39	26	47	39	16	0	25	1	0	0	0	0	23	24	79	70	0	13	0	20	50	0	37	45	8	78	17	32
YDR317W	8	7	1	0	8	0	11	2	9	0	4	3	4	0	0	0	5	0	0	0	0	8	8	0	4	0	0	7	0	0	0	0	0	1	13	4	2	0	3	0	8	11	0	2	2	0	9	0	9
YDR318W	16	19	12	7	27	0	11	2	70	2	4	22	24	1	3	0	27	19	0	0	34	23	13	40	22	11	0	3	0	0	0	0	0	5	39	14	18	2	6	0	21	30	0	13	54	8	6	7	23
YDR319C	93	54	35	20	118	0	37	15	141	0	28	32	49	11	14	0	120	8	0	27	75	80	38	56	51	12	0	15	0	0	0	0	0	49	136	68	37	2	57	0	90	56	0	8	113	18	59	32	37
YDR320C	61	33	22	8	123	0	35	10	117	5	31	33	130	4	5	1	119	25	0	41	38	71	59	69	49	22	0	8	2	0	0	0	0	22	134	143	86	0	41	1	114	69	0	34	111	17	73	55	33
YDR321W	105	93	2	1	35	0	295	86	68	8	21	12	563	17	46	0	33	236	0	193	87	152	64	133	98	9	0	58	3	0	0	0	0	34	64	646	402	0	59	16	17	132	0	85	44	9	52	48	106
YDR322W	94	80	22	17	63	0	109	60	100	5	41	49	235	11	25	0	32	61	0	61	73	79	38	85	91	19	0	38	0	0	0	0	0	61	73	125	113	1	24	14	56	92	0	84	77	43	109	54	99
YDR323C	18	14	12	18	70	0	1	2	50	3	12	7	46	2	3	0	15	2	0	33	18	20	7	20	8	3	0	3	0	0	0	0	0	2	16	10	13	1	1	0	0	22	0	0	57	2	9	2	12
YDR324C	133	105	4	3	44	0	254	100	49	5	20	10	344	23	38	0	19	130	0	101	52	168	49	117	62	24	0	32	0	0	0	0	0	5	20	291	331	4	11	4	10	127	0	69	94	6	50	30	79
YDR325W	42	47	19	5	36	0	22	13	40	2	21	6	116	6	16	0	25	27	0	16	61	47	27	58	40	7	0	7	2	0	0	0	0	9	33	68	43	1	24	2	0	46	0	13	71	9	86	27	41
YDR326C	65	78	14	1	88	0	84	27	12	2	34	10	156	12	22	0	63	48	0	57	33	81	57	68	64	16	0	13	0	0	0	0	0	16	61	140	108	4	4	7	0	109	0	13	107	6	62	26	101
YDR327W
YDR328C	200	216	151	67	520	2	374	92	518	14	186	141	1133	78	94	0	332	250	0	179	469	323	318	638	382	131	1	153	3	0	0	0	0	169	513	822	543	16	264	27	333	223	2	251	524	128	290	153	213
YDR329C	63	48	54	17	151	7	78	27	142	5	41	27	171	5	20	0	117	58	0	50	59	63	72	63	109	23	0	15	5	0	0	0	0	22	89	135	104	9	54	3	94	67	0	69	192	56	42	53	84
YDR330W	50	31	25	11	84	0	47	6	59	0	19	40	62	3	12	0	87	23	0	13	41	51	48	70	47	9	0	7	1	0	0	0	0	30	40	51	87	1	16	4	48	24	0	7	57	17	37	17	62
YDR331W	39	53	11	3	1	0	65	41	57	0	6	15	141	0	17	1	62	68	0	61	22	95	17	32	28	5	0	5	4	0	0	0	0	24	33	93	40	3	5	1	22	78	0	36	38	8	37	50	44
YDR332W	17	30	14	8	27	0	24	7	54	0	10	11	74	1	7	0	44	12	0	16	27	29	17	22	16	3	0	3	0	0	0	0	0	7	44	81	64	1	7	0	26	23	0	17	46	6	1	4	23
YDR333C	39	56	20	16	85	1	72	22	97	9	19	11	73	12	15	0	67	56	0	46	59	54	61	53	46	17	0	14	1	0	0	0	0	6	86	115	90	0	25	0	69	58	0	24	80	9	54	37	43
YDR334W	116	63	23	18	131	0	134	49	137	7	43	21	389	9	24	0	82	77	0	69	81	134	103	77	125	22	0	29	2	0	0	0	0	30	98	278	161	6	43	4	42	126	0	82	155	32	136	55	69
YDR335W	168	113	82	53	419	1	134	52	500	14	72	84	497	40	44	0	278	93	0	176	123	223	134	215	185	43	0	42	1	0	0	0	0	73	437	399	314	0	100	6	167	170	1	59	443	81	103	44	155
YDR336W	40	10	25	26	144	0	29	15	199	2	14	21	123	3	7	0	80	28	0	53	44	28	45	47	20	17	0	17	0	0	0	0	0	31	131	80	98	0	39	0	91	27	0	34	194	33	65	24	25
YDR337W	19	27	23	7	51	2	46	8	17	0	6	15	24	3	7	0	40	17	0	24	24	35	19	35	16	11	1	13	0	2	0	0	0	12	23	52	66	2	0	1	32	35	0	30	68	8	38	18	40
YDR338C	49	47	20	8	35	0	13	10	38	3	23	7	47	7	5	0	38	31	0	11	44	45	38	12	34	18	0	1	0	0	0	0	0	16	41	26	21	0	12	8	22	40	0	10	83	3	23	12	27
YDR339C	113	81	18	17	129	0	226	79	72	9	23	32	551	24	31	0	106	141	0	92	59	166	82	123	84	33	0	52	0	0	0	0	0	32	131	322	324	6	98	7	29	87	0	47	124	22	134	31	80
YDR340W
YDR341C	235	221	38	18	81	9	340	118	103	9	90	48	1072	38	134	2	210	294	0	372	195	382	153	324	254	39	0	119	0	3	0	1	0	25	167	840	555	8	105	6	36	281	0	301	222	33	284	104	242
YDR342C
YDR343C
YDR344C
YDR345C	3005	2551	64	48	289	12	1183	763	183	72	761	102	4902	61	373	0	618	1012	0	891	1408	4277	1583	1225	1977	360	0	365	17	0	0	0	0	131	466	1361	1315	32	450	107	316	3722	1	677	456	89	1134	961	4455
YDR346C	165	146	31	10	83	0	255	66	113	6	36	50	590	7	48	0	107	161	0	176	136	284	127	175	114	51	0	56	1	0	0	0	0	32	98	516	379	3	89	4	27	196	0	115	150	29	167	73	139
YDR347W	43	51	30	10	81	0	79	34	27	6	47	25	174	19	18	0	85	61	0	19	77	110	48	102	60	5	0	22	0	0	0	0	0	45	55	99	193	1	45	11	2	39	0	43	48	23	49	50	65
YDR348C	115	104	39	8	139	1	86	49	102	3	39	54	239	6	33	0	133	77	0	70	113	137	55	110	68	33	0	22	1	0	0	0	0	38	79	190	126	0	60	3	70	134	0	75	152	25	64	38	120
YDR349C	137	71	37	21	126	1	101	52	161	5	73	39	286	28	36	0	159	87	0	79	90	189	73	150	116	24	0	61	1	0	0	0	0	36	145	337	191	1	52	12	47	101	0	64	254	28	38	25	102
YDR350C	69	76	33	14	74	3	39	8	89	0	23	25	65	0	5	0	97	26	0	30	68	77	67	52	96	21	0	8	0	0	0	0	0	16	155	50	56	1	70	0	36	59	0	11	128	15	32	30	58
YDR351W	84	54	32	11	114	2	59	30	72	3	23	12	99	2	18	0	58	43	0	22	87	132	85	72	77	21	0	15	0	0	0	0	0	18	99	115	68	0	9	0	57	97	0	43	83	35	41	41	66
YDR352W	171	96	39	38	307	0	101	26	265	8	137	52	218	20	38	0	180	62	1	97	205	221	205	154	198	53	0	28	1	0	0	0	0	53	257	254	124	1	100	6	63	181	0	101	238	59	235	114	178
YDR353W	327	300	141	101	596	1	714	187	405	28	151	156	2062	95	104	0	687	396	0	496	318	456	203	614	391	88	0	161	2	0	0	12	0	165	417	1401	999	11	188	27	218	286	0	368	388	99	301	113	265
YDR354W	256	202	127	44	307	0	172	52	398	22	132	99	509	59	159	0	342	115	0	162	271	339	192	629	235	35	0	71	4	0	0	0	0	118	486	282	205	4	157	8	171	254	0	324	450	65	269	140	204
YDR355C
YDR356W	39	24	12	9	89	0	41	11	43	5	17	13	60	14	3	0	93	23	0	31	79	78	49	33	47	6	0	5	2	0	0	0	0	19	57	35	53	0	0	0	3	62	0	26	53	14	48	31	34
YDR357C	75	101	63	20	69	2	63	17	121	5	42	43	122	15	25	0	137	54	0	78	46	75	42	110	77	19	0	20	1	0	0	0	0	50	132	136	98	1	71	5	54	63	0	30	61	29	38	42	90
YDR358W	79	67	60	32	150	3	29	2	95	0	38	28	65	7	7	0	80	28	0	45	65	77	28	44	106	25	0	10	2	0	0	0	0	30	136	97	74	6	72	12	79	89	0	15	139	40	86	37	72
YDR359C	47	59	7	12	35	0	25	6	47	1	14	16	38	8	9	0	63	19	0	51	16	77	26	35	23	11	0	3	1	0	0	0	0	10	34	27	40	6	12	5	0	56	0	10	57	6	31	19	48
YDR360W
YDR361C	76	55	4	5	62	0	116	30	41	3	18	12	391	0	20	0	42	98	0	48	34	83	58	137	35	8	0	35	0	0	0	0	0	15	91	280	189	0	39	0	12	35	0	27	88	9	34	34	64
YDR362C	32	33	19	2	72	0	51	18	90	3	19	9	73	0	8	0	50	36	0	13	71	49	51	39	59	10	0	8	0	0	0	0	0	12	52	60	47	3	18	0	24	63	0	33	65	18	77	54	83
YDR363W	6	7	9	4	20	0	2	1	31	0	0	2	3	0	3	0	11	3	0	5	18	19	3	35	2	2	0	2	0	0	0	0	0	2	9	11	8	1	0	0	6	6	0	0	6	1	4	1	11
YDR364C	16	4	0	5	24	0	7	4	15	0	7	1	34	1	3	0	22	3	0	5	17	21	3	5	3	1	0	5	0	0	0	0	0	3	18	21	8	0	4	0	0	16	0	14	34	2	3	5	10
YDR365C	134	111	10	3	24	1	366	161	63	16	18	20	745	13	33	0	51	259	0	203	68	168	66	183	64	23	0	77	2	0	0	0	0	18	93	653	454	1	46	12	43	174	0	75	137	12	100	30	163
YDR366C
YDR367W	100	65	35	20	122	2	97	31	101	5	42	32	243	9	31	0	127	76	0	46	62	101	81	57	64	30	0	16	0	0	0	0	0	31	55	163	165	1	55	7	48	80	0	53	59	25	51	46	89
YDR368W	288	178	114	52	461	3	257	43	361	13	95	141	540	45	34	0	289	184	0	122	188	448	274	370	287	109	0	61	3	0	0	0	0	111	352	424	266	3	291	10	122	321	0	102	412	99	236	159	268
YDR369C	39	36	19	9	41	2	22	5	68	1	8	18	13	4	5	0	20	13	0	14	61	40	22	20	25	13	0	6	0	0	0	0	0	10	26	34	36	0	0	3	13	19	0	9	46	3	15	17	16
YDR370C	40	30	16	6	23	0	42	26	57	1	5	9	105	4	4	0	37	27	0	42	7	52	24	34	38	5	0	10	0	0	0	0	0	13	68	77	36	1	17	0	36	37	0	17	40	12	66	10	33
YDR371W	15	31	19	2	41	1	26	14	76	0	17	20	84	0	14	0	51	24	0	32	54	37	31	42	16	1	0	10	1	0	0	0	0	19	60	33	37	3	14	2	75	24	0	38	73	14	28	21	39
YDR372C	84	51	28	7	136	0	92	41	77	5	23	32	175	11	27	0	133	65	0	100	55	100	68	157	79	25	0	29	7	0	0	0	0	32	86	127	131	2	49	1	58	64	0	35	50	11	82	67	66
YDR373W	145	127	46	30	206	0	136	68	143	0	39	66	268	17	56	0	149	95	0	68	199	94	124	132	192	20	0	36	0	0	0	0	0	30	123	216	157	0	34	3	87	134	0	102	207	29	93	80	125
YDR374C	0	3	11	0	0	0	0	2	26	0	0	8	0	0	0	0	18	0	0	0	0	16	10	13	12	3	0	0	0	0	0	0	0	6	13	0	0	0	5	0	28	1	0	0	14	0	12	0	7
YDR375C	33	21	11	20	21	0	47	11	38	9	13	12	89	1	11	0	36	27	0	50	33	11	21	35	41	7	0	17	0	0	0	0	0	21	28	57	46	1	2	1	24	41	0	81	27	5	46	18	39
YDR376W	58	64	31	21	243	1	63	29	162	13	37	25	149	9	12	0	104	21	0	23	71	81	20	74	51	26	0	13	0	0	0	0	0	34	118	82	101	2	80	6	45	59	0	49	97	36	54	66	65
YDR377W	226	168	163	55	390	3	34	42	136	0	164	109	206	4	71	0	203	94	0	77	132	297	97	156	351	58	0	44	0	0	0	0	0	66	142	246	81	4	55	0	115	235	0	122	106	75	258	221	192
YDR378C	326	323	114	75	316	5	662	151	394	24	145	132	1198	50	115	0	504	503	0	399	277	437	219	450	378	86	0	89	14	0	0	0	0	163	445	607	729	12	286	33	120	356	0	178	479	87	260	277	330
YDR379W	51	54	31	8	66	2	38	18	79	5	35	21	90	7	7	0	11	23	0	14	11	99	49	50	99	18	0	6	1	0	0	0	0	18	53	62	43	2	24	2	3	72	0	7	70	7	23	32	70
YDR380W	39	35	5	6	43	0	57	23	27	3	13	13	173	2	9	0	21	41	0	51	106	51	36	14	50	21	0	37	0	0	0	0	0	4	11	49	164	0	2	1	4	32	0	16	13	8	95	58	46
YDR381W
YDR382W	995	740	98	90	394	7	1950	547	269	97	310	184	4328	132	426	0	200	1939	1	1043	907	1354	812	606	1049	186	2	455	7	5	1	7	1	118	399	3404	3492	18	343	87	73	986	2	864	241	141	744	595	1097
YDR383C	46	54	13	2	35	3	25	36	33	2	19	24	73	11	9	0	44	41	0	43	29	71	41	70	50	6	0	13	0	1	2	0	0	5	59	58	46	2	24	0	0	41	0	5	45	13	44	22	59
YDR384C	64	59	27	12	117	3	198	49	74	7	18	27	421	10	62	0	108	124	0	114	77	141	60	124	71	6	0	47	1	0	0	0	0	19	81	251	171	1	57	5	29	115	0	164	104	16	36	10	123
YDR385W	1091	949	109	114	678	5	3622	1064	389	264	349	228	6166	147	474	1	407	2376	0	1670	916	1699	771	1057	934	251	0	602	21	0	1	0	1	233	485	4333	3547	24	386	362	105	1565	0	1101	595	213	977	728	1297
YDR386W	34	22	9	11	28	0	9	3	36	0	7	8	59	7	8	0	39	17	0	20	21	39	30	28	20	5	0	5	0	0	0	0	1	2	41	15	6	0	17	0	26	24	0	6	50	24	6	17	30
YDR387C	31	24	16	20	77	0	23	3	47	3	7	11	40	3	0	0	46	6	0	3	17	37	21	34	14	9	0	1	1	0	0	0	0	14	19	27	16	0	18	0	16	35	0	16	44	5	17	22	38
YDR388W	289	316	123	82	598	0	358	72	477	24	205	174	810	72	62	0	447	170	0	168	297	403	264	651	307	66	0	82	4	0	0	0	0	134	442	650	561	11	295	45	312	306	0	187	634	136	439	213	331
YDR389W	25	34	17	5	37	0	54	17	22	0	28	11	84	5	6	0	90	34	0	13	49	60	33	4	34	16	0	12	0	0	0	0	0	8	59	85	64	0	32	1	56	58	0	70	63	0	40	14	48
YDR390C	101	44	28	13	130	2	93	31	96	1	31	15	257	20	9	0	52	94	0	77	45	96	74	153	66	20	0	24	1	0	0	0	0	39	95	183	161	1	51	21	21	59	0	46	144	34	57	52	68
YDR391C	78	72	54	30	94	1	13	4	62	1	48	16	66	6	5	0	137	8	0	10	159	115	48	83	93	13	0	9	1	0	0	0	0	31	102	50	46	4	40	2	90	50	0	28	102	45	125	66	41
YDR392W	34	39	21	9	84	1	35	14	55	0	29	16	102	4	9	0	38	27	0	23	46	52	39	49	61	19	0	12	0	0	0	0	0	8	70	35	69	3	38	0	18	48	0	19	70	8	51	14	36
YDR393W	38	31	19	17	66	0	43	10	110	5	6	21	60	2	6	0	47	30	0	16	25	43	26	45	39	8	0	9	0	0	0	0	0	17	80	94	74	1	12	0	48	69	0	34	72	15	0	17	28
YDR394W	155	97	78	58	430	1	264	64	323	8	103	106	767	30	30	0	286	201	0	250	132	234	87	235	181	44	0	80	10	0	0	0	0	119	344	546	379	1	130	15	151	144	0	64	389	56	122	78	182
YDR395W	187	118	23	12	133	3	232	71	54	20	49	22	359	4	31	0	102	165	0	111	161	181	61	81	122	9	0	53	0	0	0	0	0	14	68	402	178	1	42	16	13	179	0	67	151	12	111	56	148
YDR396W
YDR397C	357	304	71	37	277	2	409	97	306	10	88	76	803	49	57	1	274	203	0	334	293	425	318	318	321	73	0	68	4	0	0	0	0	48	349	659	517	9	128	22	165	361	0	154	302	63	322	105	243
YDR398W	187	142	15	4	104	1	251	169	150	11	39	37	886	39	42	3	124	198	0	203	91	294	98	330	113	25	1	96	1	1	0	1	1	28	185	675	476	8	103	23	57	233	0	137	266	6	141	51	187
YDR399W	860	793	53	46	415	6	1059	415	455	20	340	141	2786	59	214	0	292	841	0	532	739	1082	756	826	756	199	0	174	7	1	0	1	2	93	549	1812	1510	7	221	37	79	893	0	263	630	53	982	401	654
YDR400W	56	39	10	1	36	0	58	30	30	0	8	23	66	1	8	0	24	57	0	51	42	36	16	53	31	1	0	13	0	0	0	0	0	9	34	145	26	4	18	8	25	33	0	0	50	3	30	16	32
YDR401W
YDR402C	1	0	1	0	7	0	6	2	26	0	0	2	6	0	2	0	6	4	0	10	0	1	0	23	2	0	0	1	0	0	0	0	0	2	14	4	6	0	9	0	31	1	0	0	9	1	0	0	0
YDR403W	6	5	1	2	2	0	2	0	18	0	0	1	13	0	0	0	0	1	0	0	0	0	2	7	1	0	0	3	0	0	0	0	0	8	3	10	0	0	0	0	0	5	0	0	6	0	7	5	0
YDR404C	64	49	31	19	115	0	128	30	133	6	40	43	196	22	18	0	72	99	1	108	104	107	59	84	76	10	0	15	0	0	2	0	0	30	126	209	154	0	30	17	37	67	0	33	75	19	83	57	75
YDR405W	75	78	28	16	62	0	59	25	137	2	28	28	167	10	23	0	72	59	0	65	83	95	41	76	96	12	0	42	1	0	0	0	0	48	73	147	108	0	51	5	68	78	0	59	119	26	105	39	80
YDR406W	54	35	16	11	51	0	23	14	43	0	15	11	39	0	1	0	33	9	0	27	45	68	39	33	27	12	0	1	0	0	0	0	0	22	52	26	9	0	18	0	71	62	0	3	49	4	101	21	28
YDR407C	92	76	57	28	126	0	85	26	248	2	33	35	163	7	13	0	128	47	0	51	83	86	44	74	57	9	0	14	1	0	0	0	0	36	150	84	109	3	87	8	74	81	0	1	156	37	103	55	72
YDR408C	277	205	130	47	435	4	247	81	519	23	77	154	815	39	104	0	333	246	0	184	307	320	263	433	271	38	0	72	1	0	0	0	0	113	683	524	685	9	158	28	139	203	0	262	557	60	152	143	213
YDR409W	18	20	1	16	23	0	21	7	30	0	8	5	80	2	5	0	48	13	0	52	51	62	30	62	59	8	0	17	0	0	0	0	0	5	28	75	58	0	21	3	30	30	0	8	38	5	16	29	18
YDR410C	29	44	13	1	71	0	41	7	27	1	13	20	85	10	11	0	80	40	0	28	60	53	33	42	38	12	0	7	1	0	0	0	0	15	27	53	36	0	9	0	16	25	0	10	112	10	35	31	33
YDR411C	57	93	16	26	82	1	63	15	80	2	54	42	175	7	16	0	104	40	0	78	70	102	54	63	111	29	0	13	2	0	0	0	0	48	104	145	165	4	43	1	39	84	0	38	76	14	146	43	60
YDR412W	143	82	12	7	72	0	251	76	62	19	22	25	395	20	21	0	104	187	0	125	56	161	72	185	70	23	0	56	1	0	0	0	0	28	73	289	233	9	57	15	26	101	0	46	72	6	39	63	143
YDR413C
YDR414C	29	23	11	2	47	0	78	20	42	11	13	21	149	1	8	0	37	31	0	17	13	48	12	69	34	10	0	9	0	0	0	0	0	8	62	129	46	3	25	1	14	29	0	25	61	3	12	36	35
YDR415C	42	21	15	14	108	1	26	9	65	0	15	17	62	11	10	0	67	7	0	25	74	35	50	54	69	7	0	14	0	0	0	0	0	13	46	126	85	0	23	6	55	31	0	16	63	5	79	15	28
YDR416W	43	28	22	3	47	0	25	24	106	1	22	15	113	3	7	0	99	48	0	6	44	86	48	46	82	5	0	9	1	0	0	0	0	19	64	77	72	2	45	6	64	82	0	11	134	6	36	22	20
YDR417C
YDR418W	343	362	65	42	279	3	1335	390	136	72	123	119	3799	43	294	4	221	864	2	966	372	690	313	395	426	86	0	341	5	0	3	2	1	50	231	2400	1845	21	97	100	69	395	1	588	224	41	390	218	349
YDR419W	38	28	3	4	20	0	21	7	10	0	7	12	24	0	0	0	34	10	0	5	41	30	36	21	35	3	0	5	0	0	0	0	0	2	9	21	17	0	18	0	0	18	0	9	43	3	1	15	19
YDR420W	137	87	13	3	53	0	90	31	42	4	51	15	162	20	12	0	46	38	0	69	63	177	66	54	84	22	0	20	1	0	0	0	0	23	57	149	126	2	33	3	16	164	0	43	47	16	67	28	111
YDR421W	38	43	16	7	65	0	31	6	149	4	27	22	90	5	1	0	93	27	0	54	29	63	43	47	66	1	0	4	1	0	0	0	0	16	95	70	65	7	29	0	80	33	0	10	161	8	61	48	30
YDR422C	80	55	15	12	60	0	28	9	58	5	15	16	65	1	5	0	99	17	0	47	35	101	50	27	26	6	0	18	0	0	0	0	0	29	85	96	47	0	8	3	14	48	0	41	105	12	32	6	47
YDR423C	65	54	41	22	138	0	38	49	152	2	36	48	118	5	10	0	44	25	0	51	108	99	66	58	66	18	0	10	3	0	0	0	0	53	115	89	49	2	26	7	80	91	0	68	165	29	81	72	77
YDR424C	156	88	52	21	151	1	120	37	112	5	47	50	253	20	32	0	124	97	1	103	43	155	123	127	176	53	0	18	2	0	0	0	0	44	120	145	168	0	89	10	75	140	1	91	88	38	118	91	106
YDR425W	62	60	29	20	60	4	41	1	23	0	54	33	41	2	10	0	36	17	0	14	26	110	70	24	94	16	0	5	0	0	0	0	0	38	46	64	58	0	37	0	39	63	0	36	67	10	83	27	75
YDR426C
YDR427W	120	138	116	62	471	2	243	84	293	6	98	119	734	34	59	0	316	194	0	214	194	203	121	265	131	32	0	75	3	0	0	0	0	112	368	439	404	3	131	11	77	131	0	103	282	117	85	82	134
YDR428C	17	45	6	1	51	0	53	14	10	0	12	12	135	4	3	0	50	23	0	31	16	71	24	25	30	10	0	17	2	0	0	0	0	21	25	113	71	2	21	0	32	20	0	8	46	5	16	14	18
YDR429C	204	168	38	12	217	1	657	342	121	31	37	94	1240	27	127	0	232	501	0	370	141	373	122	317	155	37	0	125	1	0	0	0	0	50	169	1103	704	2	93	24	48	233	2	302	180	38	222	115	230
YDR430C	40	25	28	17	82	0	66	31	37	3	23	19	121	3	5	0	79	42	0	63	12	47	22	16	72	12	0	21	0	0	0	0	0	35	39	104	113	1	12	10	27	34	0	95	33	31	30	30	14
YDR431W
YDR432W	180	123	35	18	154	1	318	123	153	21	63	74	650	17	39	2	156	216	1	225	59	266	91	246	114	12	0	71	0	2	0	1	0	48	181	471	381	3	86	20	44	208	1	148	150	51	116	61	161
YDR433W
YDR434W	83	61	28	8	61	0	84	27	100	5	36	39	181	11	18	0	64	36	0	43	77	75	56	136	81	21	0	26	0	0	0	0	0	48	105	170	131	3	23	17	38	83	0	78	96	25	99	72	57
YDR435C	72	42	69	13	197	2	70	23	90	6	46	50	94	11	18	0	174	37	0	73	81	107	75	62	123	20	0	12	0	0	0	0	0	38	163	126	63	4	89	3	125	61	0	35	155	29	44	58	108
YDR436W	18	40	10	4	65	0	30	4	24	7	25	18	47	0	4	0	71	23	0	15	36	40	40	31	69	8	0	4	0	0	0	0	0	20	88	26	51	0	35	6	13	38	0	19	60	13	11	12	31
YDR437W	0	0	0	0	0	0	2	0	0	0	0	0	0	0	0	0	0	0	0	0	0	0	0	0	0	0	0	0	0	0	0	0	0	0	0	1	0	0	0	0	0	0	0	0	0	0	0	0	3
YDR438W	8	16	9	7	19	0	3	1	14	0	8	13	12	1	2	0	30	11	0	5	19	21	6	3	9	7	0	7	0	0	0	0	0	9	35	30	20	2	3	0	31	14	0	7	29	0	8	3	10
YDR439W	36	16	5	7	75	0	10	7	36	1	5	6	99	4	2	1	36	28	0	22	13	40	25	19	9	12	0	9	0	0	0	0	0	13	35	67	33	2	10	0	50	31	0	43	46	10	51	11	28
YDR440W	29	42	15	6	32	0	42	15	25	0	9	12	122	3	11	0	60	48	0	47	54	80	29	71	30	4	0	8	0	0	0	0	0	12	49	93	95	1	22	0	1	45	0	37	27	35	14	26	44
YDR441C	74	69	24	1	47	0	51	49	11	0	20	22	187	9	14	0	56	58	0	97	77	109	26	50	53	17	0	24	0	0	0	0	0	14	14	97	50	1	38	1	9	100	0	33	39	6	12	27	140
YDR442W
YDR443C	6	0	2	6	21	0	0	0	6	0	0	2	7	0	1	0	5	7	0	8	24	0	10	13	7	6	0	3	0	0	0	0	0	11	15	15	10	0	14	0	0	4	0	0	5	3	18	4	9
YDR444W	12	20	5	4	48	0	43	7	9	0	14	6	75	0	8	0	31	16	0	43	22	26	25	49	36	11	0	3	0	0	0	0	0	4	16	70	44	1	6	5	3	25	0	11	21	7	35	16	37
YDR445C
YDR446W	4	32	0	0	0	0	17	58	0	1	3	8	25	5	10	0	5	7	0	9	0	54	7	9	14	0	0	1	1	0	0	0	0	0	1	22	22	0	6	4	0	40	0	0	8	0	16	1	13
YDR447C
YDR448W	70	36	23	23	29	3	52	33	73	41	19	23	60	7	17	44	71	63	18	74	41	117	24	55	12	18	19	6	9	34	27	15	36	39	69	57	81	8	30	56	34	97	97	22	81	29	79	36	82
YDR449C	180	125	52	90	110	26	397	115	140	196	133	43	574	44	69	152	157	330	15	162	101	213	124	298	140	91	55	64	15	47	55	79	87	118	257	419	299	69	157	260	50	179	77	135	211	115	132	137	153
YDR450W	859	642	92	60	534	16	3317	832	347	177	292	204	7126	103	516	8	410	2661	1	2360	833	1159	614	816	977	162	0	599	14	7	21	1	1	177	545	4309	3691	23	320	227	162	827	0	1207	475	127	779	443	695
YDR451C	49	53	11	7	78	0	33	9	31	0	37	25	59	7	10	0	54	20	0	54	89	59	49	34	52	15	0	14	1	0	0	0	0	26	21	74	46	2	21	3	41	60	0	16	70	9	75	44	54
YDR452W	176	174	107	39	325	1	150	53	245	4	57	112	317	40	48	0	305	95	0	72	109	287	126	206	194	35	0	33	3	0	0	0	0	105	357	277	187	7	100	11	170	210	0	149	308	39	219	95	202
YDR453C	62	75	43	14	131	0	30	15	206	0	28	32	38	27	13	0	327	26	0	58	18	82	34	192	63	9	0	14	1	0	0	0	0	14	188	31	20	7	34	0	340	32	0	20	199	23	10	39	12
YDR454C	438	428	46	38	315	12	853	272	213	16	176	135	2194	51	132	0	218	685	0	576	403	774	488	448	456	87	1	240	2	0	0	0	0	74	260	1570	1207	10	143	31	119	475	1	183	241	63	316	259	453
YDR455C
YDR456W	192	157	43	12	132	2	119	44	164	7	100	47	368	18	25	0	131	55	0	98	241	348	113	137	258	44	0	30	3	0	0	0	0	91	171	208	211	3	122	0	98	187	0	105	265	53	199	126	181
YDR457W	114	144	27	29	178	0	142	18	150	8	99	39	417	23	28	0	266	75	0	190	108	198	120	154	192	13	0	40	0	0	0	0	0	48	113	393	185	7	66	11	37	200	0	61	200	25	270	66	177
YDR458C	56	67	15	9	36	1	38	9	34	12	6	14	91	6	2	0	48	29	0	31	81	86	37	59	39	1	0	17	1	0	0	0	0	13	63	73	37	0	9	1	47	51	0	24	52	11	38	23	65
YDR459C	41	38	20	22	80	0	19	5	99	2	22	17	59	12	9	0	90	39	0	33	53	66	42	42	45	10	0	4	0	0	0	0	0	15	61	27	63	3	18	1	37	44	0	37	123	24	64	13	45
YDR460W	35	21	37	22	175	1	60	12	112	8	11	28	161	13	8	0	77	23	0	52	37	42	47	80	47	5	0	12	0	0	0	0	0	35	133	77	58	0	29	4	16	26	2	9	93	11	35	22	57
YDR461W
YDR462W	58	39	53	22	121	0	39	30	69	1	49	44	176	8	22	0	29	59	0	38	46	54	37	65	65	25	0	31	2	0	0	1	0	28	60	117	93	2	94	6	56	34	0	37	88	21	78	49	57
YDR463W	147	115	33	33	101	0	71	12	97	11	31	46	167	16	27	0	65	77	0	82	137	215	96	91	106	25	0	8	3	0	0	0	0	34	152	163	81	2	99	13	71	178	0	45	76	33	77	80	184
YDR464W	122	82	7	9	86	1	76	27	35	0	20	12	137	33	11	0	45	38	0	31	91	157	104	131	76	9	0	17	0	0	0	0	0	1	62	120	86	1	35	1	3	100	0	39	52	9	134	27	72
YDR465C	77	79	7	3	21	0	197	79	19	5	9	10	402	2	27	0	13	122	0	166	32	134	61	74	45	2	0	36	0	0	0	0	0	7	76	353	208	1	10	11	0	101	0	24	41	3	62	19	81
YDR466W	87	74	18	5	92	0	41	16	68	6	22	26	93	5	10	0	76	48	0	42	60	114	81	24	90	12	0	15	1	0	0	0	0	29	69	119	77	0	22	8	21	109	0	19	38	30	74	51	74
YDR467C
YDR468C	52	54	34	14	110	0	96	32	102	6	25	33	188	18	14	0	105	81	0	63	78	103	34	70	89	18	0	18	1	0	0	0	0	18	65	73	58	2	68	0	41	86	0	2	67	17	33	44	63
YDR469W	59	44	19	13	62	0	85	25	63	5	31	28	139	4	17	0	74	69	0	114	64	93	39	83	65	9	0	29	0	0	0	0	0	42	88	117	101	3	56	3	9	59	0	30	125	23	94	20	54
YDR470C	28	18	1	4	46	0	28	10	27	1	10	6	49	0	4	0	11	24	0	11	15	32	21	30	43	5	0	9	1	0	0	0	0	7	26	22	28	0	8	0	14	21	0	9	9	16	13	20	25
YDR471W	538	440	55	35	316	1	1361	573	141	89	145	118	3646	63	382	1	456	1037	0	1309	519	704	331	533	534	91	1	215	9	0	0	0	0	62	291	2242	1767	8	177	59	17	539	0	583	184	56	533	273	362
YDR472W	49	22	21	5	69	0	36	26	61	2	10	18	185	10	17	0	46	47	0	23	43	75	23	38	46	7	0	14	1	0	0	0	0	18	39	114	96	1	21	3	21	56	0	51	35	15	22	18	25
YDR473C	32	19	7	2	27	0	4	16	40	0	31	15	40	12	8	0	23	11	0	27	27	41	20	16	23	7	0	12	0	0	0	0	0	5	3	60	38	0	8	2	1	22	0	11	9	9	4	19	36
YDR475C	68	30	19	21	60	0	28	9	72	0	20	16	58	9	6	0	55	11	0	41	67	56	45	46	77	9	0	9	0	0	0	0	0	41	57	91	52	1	15	17	95	68	0	18	34	2	74	27	69
YDR476C	85	73	47	28	205	0	50	33	184	3	43	43	260	13	31	0	185	74	0	79	44	111	78	131	91	16	0	32	0	0	0	0	0	43	180	158	117	1	57	2	68	66	0	46	227	27	66	44	71
YDR477W	103	60	63	16	213	4	102	41	111	7	44	38	217	16	22	0	101	45	1	48	145	168	61	74	117	18	0	20	1	0	0	0	0	42	90	175	141	0	62	3	39	93	0	67	100	44	97	53	55
YDR478W	8	18	5	5	10	0	31	9	16	6	8	12	48	2	4	0	28	34	0	15	29	35	18	32	23	5	0	7	0	0	0	0	0	4	34	58	16	0	8	7	0	26	0	0	33	14	0	5	21
YDR479C	93	52	48	9	136	1	38	14	189	6	29	11	97	5	8	0	81	29	0	22	101	116	59	63	124	33	1	12	1	0	0	0	0	49	147	105	45	3	96	8	171	60	0	59	217	42	25	18	59
YDR480W	86	52	41	16	101	0	63	7	94	0	58	47	84	11	6	0	65	62	0	67	56	64	40	63	50	15	0	4	0	0	0	0	0	27	72	76	31	1	27	4	47	80	0	22	125	11	66	29	68
YDR481C	288	220	67	44	229	4	210	20	233	9	240	89	178	26	51	0	295	94	0	121	253	379	183	310	284	77	0	30	3	0	0	0	0	105	258	600	167	7	177	21	34	309	0	113	323	48	161	182	329
YDR482C	63	33	24	13	66	1	71	16	62	3	23	26	85	5	12	0	131	54	0	25	44	118	44	62	72	6	0	2	0	0	0	0	0	19	86	55	57	2	4	0	53	26	0	22	60	20	98	24	52
YDR483W	279	265	67	31	257	1	314	54	247	21	105	69	555	35	47	0	287	194	0	156	221	439	222	211	248	50	0	50	3	2	0	0	0	52	250	381	351	5	82	6	86	302	0	132	322	50	235	114	230
YDR484W	20	31	6	21	57	0	38	7	46	5	19	16	47	3	3	0	27	11	0	27	59	67	26	14	21	7	0	5	1	0	0	0	0	24	57	40	22	0	0	0	18	35	0	0	50	15	12	20	30
YDR485C	61	32	21	14	86	0	48	11	52	6	15	26	81	21	13	1	18	57	0	34	32	62	42	50	60	10	0	12	1	0	0	0	0	17	31	83	80	1	41	2	76	84	0	20	37	14	145	36	77
YDR486C	60	33	34	16	96	0	34	19	6	0	23	21	101	4	16	0	108	27	0	73	45	55	25	31	56	12	0	13	1	0	0	0	0	15	69	79	43	1	48	7	50	36	0	48	62	26	46	32	37
YDR487C	175	159	53	30	286	2	244	59	181	3	101	83	409	49	133	0	181	142	0	221	214	339	126	393	181	50	0	85	0	0	0	0	0	86	191	371	316	6	123	9	33	171	0	265	315	49	228	84	217
YDR488C	4	22	1	0	8	0	13	6	17	0	8	7	4	0	0	0	1	13	0	7	0	22	7	23	1	7	0	0	0	0	0	0	0	2	5	2	6	0	20	0	15	22	0	0	11	4	4	3	29
YDR489W	17	21	8	4	42	0	9	6	60	0	8	9	53	0	2	0	20	14	0	29	8	24	14	13	6	1	0	15	0	0	0	0	0	14	37	27	27	0	7	0	19	19	0	10	21	15	74	8	12
YDR490C	70	54	41	10	142	0	35	8	166	1	22	32	115	18	11	0	69	18	0	29	48	84	50	74	75	13	0	19	2	0	0	0	0	34	150	86	85	2	32	0	138	77	0	39	150	16	80	29	48
YDR491C
YDR492W	112	56	4	0	6	0	71	127	10	2	19	12	149	6	5	0	25	59	0	83	43	143	66	31	33	8	0	19	0	0	0	0	0	11	22	141	92	0	14	6	28	112	0	4	30	8	22	36	109
YDR493W	29	28	12	7	91	3	19	15	17	3	8	9	64	3	14	0	35	20	0	45	17	42	13	46	21	12	0	19	0	0	0	0	0	18	42	37	64	1	7	2	23	6	0	52	15	4	16	12	21
YDR494W	68	61	35	22	98	0	102	46	116	13	17	17	143	1	23	0	75	44	0	50	48	67	76	45	40	7	0	21	0	0	0	0	0	46	53	135	139	0	34	2	72	56	0	66	62	30	53	20	35
YDR495C	26	22	9	6	36	0	18	7	40	1	12	6	59	3	7	0	45	27	0	31	36	40	38	41	32	8	0	5	0	0	0	0	0	8	18	59	23	2	1	3	13	39	0	9	22	8	9	12	43
YDR496C	98	112	4	7	39	0	270	151	62	30	15	15	445	2	20	0	55	199	0	158	110	268	36	168	71	7	0	52	0	0	0	0	0	3	61	351	357	3	20	10	27	172	0	59	79	2	54	24	129
YDR497C	591	522	556	299	2178	8	352	95	630	24	525	603	783	245	463	0	1277	191	0	216	725	753	514	1900	638	217	0	151	6	0	0	0	0	606	1103	440	490	45	527	66	632	699	0	867	1100	615	499	491	605
YDR498C	55	24	30	14	78	0	34	15	83	3	18	21	87	11	7	0	52	23	0	38	8	59	25	48	24	14	0	13	0	0	0	0	0	25	67	78	86	0	21	1	36	39	0	19	98	10	92	25	45
YDR499W	75	81	8	0	89	0	36	44	66	0	15	22	59	4	31	0	78	15	0	55	112	109	56	87	63	8	0	8	0	0	12	0	8	17	47	99	60	0	30	1	12	74	3	35	61	14	32	36	60
YDR500C
YDR501W	37	33	44	23	82	1	9	3	82	0	22	41	36	7	9	0	74	23	0	26	74	48	24	66	12	3	0	23	0	0	0	0	0	21	60	33	19	1	22	0	43	79	0	33	103	16	87	15	22
YDR502C	692	507	833	520	5001	2	164	93	1501	11	504	982	369	97	269	5	1990	102	0	68	870	932	374	1642	647	173	5	101	4	0	4	1	0	1184	1709	383	177	48	504	6	1499	599	0	803	1857	767	571	378	672
YDR503C	37	14	15	3	52	0	31	16	73	0	8	18	121	4	2	0	35	32	0	16	28	35	28	71	19	10	0	28	1	0	0	0	0	18	78	85	64	2	59	0	38	20	0	7	100	21	31	28	36
YDR504C
YDR505C	9	3	9	0	25	0	5	3	23	3	6	3	14	1	3	0	43	10	0	10	11	13	6	6	11	3	0	1	0	0	0	0	0	22	46	7	6	0	0	0	8	21	0	16	4	15	1	14	4
YDR506C	1	6	4	1	2	0	4	0	0	3	6	0	6	0	0	0	0	0	0	1	8	3	3	1	2	9	0	0	0	0	0	0	0	1	1	13	3	0	8	0	0	4	0	0	1	4	0	0	4
YDR507C	101	76	38	27	164	0	115	48	133	11	42	41	210	4	16	0	163	76	0	114	47	130	69	135	57	35	0	19	1	0	0	0	0	40	102	153	111	1	58	6	21	139	0	52	106	61	107	76	73
YDR508C	188	219	116	56	421	0	600	201	218	41	74	131	967	70	167	0	375	321	0	307	324	416	210	477	237	35	0	164	0	6	6	0	0	167	165	823	777	12	145	32	155	259	1	411	368	82	276	165	226
YDR509W
YDR510W	288	189	103	64	597	0	490	107	226	21	139	132	1088	63	90	0	673	341	0	425	382	354	218	476	267	69	0	88	8	0	0	0	0	114	311	1054	503	12	140	28	162	251	0	266	264	102	296	161	263
YDR511W	44	45	70	10	59	0	69	22	64	0	37	50	119	3	24	0	53	38	0	61	98	31	44	31	73	8	0	14	0	0	0	0	0	38	80	51	81	1	30	10	17	38	0	59	78	15	30	56	19
YDR512C	90	97	77	24	137	0	111	20	43	3	47	76	97	16	33	0	235	55	0	120	62	111	47	99	80	21	0	12	1	0	0	0	0	71	97	83	76	3	11	0	70	72	0	40	75	42	40	72	52
YDR513W	207	249	371	117	947	9	248	55	584	34	193	321	534	73	75	2	530	162	0	122	301	365	247	469	517	107	0	84	3	1	0	0	0	263	689	301	366	11	249	12	444	305	0	162	627	243	343	216	165
YDR514C	31	38	9	3	85	0	29	13	20	0	1	25	66	3	14	1	33	23	0	18	35	17	37	36	25	7	0	7	4	0	0	0	0	1	12	55	26	0	4	5	51	17	0	10	59	2	50	16	14
YDR515W	25	9	9	1	32	0	7	13	3	7	12	18	47	3	2	0	12	17	0	3	27	25	8	15	12	4	0	3	0	0	0	0	0	16	20	33	32	0	0	2	0	13	1	6	5	1	6	12	15
YDR516C	71	43	144	29	192	3	61	11	254	0	42	39	270	16	7	2	91	28	0	38	117	81	72	130	116	9	1	29	4	2	0	0	1	54	176	199	69	1	83	0	214	68	0	32	128	28	128	40	48
YDR517W	85	108	74	32	347	0	80	19	350	5	61	45	261	32	17	0	180	95	0	74	110	157	78	166	164	33	0	49	0	0	0	0	0	84	330	250	137	4	128	15	108	113	0	61	258	26	103	74	121
YDR518W	76	48	33	14	126	0	101	18	180	14	36	20	247	33	16	0	112	91	0	53	51	62	68	127	63	9	0	31	0	0	0	0	0	33	160	235	145	6	75	7	53	50	0	48	147	49	155	26	61
YDR519W	117	83	30	18	199	0	106	73	148	13	41	56	318	10	40	0	91	103	0	136	185	138	104	104	113	41	0	41	0	0	0	0	0	38	132	237	168	1	38	4	24	122	0	84	121	36	117	66	90
YDR520C	14	11	6	3	27	0	10	2	34	0	17	9	7	0	3	0	33	0	0	24	7	37	17	16	18	5	0	2	1	0	0	0	0	7	63	22	20	0	5	0	0	44	0	2	29	8	2	20	20
YDR521W
YDR522C	0	0	0	0	0	0	0	0	5	0	0	0	0	0	0	0	0	0	0	0	0	0	0	0	0	0	0	0	0	0	0	0	0	2	0	0	0	0	0	0	0	1	0	0	0	5	0	0	0
YDR523C	4	6	0	4	0	0	1	1	26	0	8	0	12	0	0	0	0	6	0	0	4	8	10	0	10	3	0	0	0	0	0	0	0	0	0	1	4	1	0	0	18	2	0	0	0	0	0	3	7
YDR524C	48	22	12	8	40	0	30	12	19	4	11	8	41	0	8	0	36	19	0	25	4	57	14	4	44	1	0	9	0	0	0	0	0	7	29	12	41	0	11	1	20	28	0	11	16	1	33	7	32
YDR525W
YDR526C
YDR527W	55	44	14	4	93	4	81	38	109	3	10	19	197	7	22	0	91	52	0	63	13	104	45	69	38	10	0	21	0	0	0	0	0	34	99	184	135	2	28	1	36	64	0	46	161	22	26	11	52
YDR528W	47	57	24	11	88	0	97	24	88	0	35	25	124	8	9	0	104	49	0	38	57	99	52	35	41	13	1	8	1	0	0	0	0	14	174	160	108	1	24	6	35	91	0	20	105	5	30	30	72
YDR529C	697	563	654	190	1348	0	215	190	399	20	536	423	550	58	252	0	651	252	0	373	521	751	221	307	918	228	0	143	6	0	0	0	0	360	646	485	197	9	184	37	254	637	1	520	551	351	1039	696	364
YDR530C	49	78	73	39	202	0	27	6	335	1	21	46	95	13	13	0	278	42	0	20	56	96	85	238	56	18	0	12	0	0	0	0	0	43	334	91	52	1	59	1	150	84	0	33	285	55	48	42	91
YDR531W	48	62	30	18	68	0	47	27	113	4	21	23	143	12	41	0	92	44	0	66	110	131	42	103	49	1	0	24	1	0	0	0	0	32	64	148	88	4	44	12	22	64	2	60	128	19	34	30	55
YDR532C	44	37	11	17	33	0	22	7	19	0	14	13	58	0	7	0	27	22	1	41	15	25	26	15	19	5	1	0	0	0	0	0	0	22	33	34	20	1	29	1	16	30	0	0	20	16	0	10	22
YDR533C	98	114	73	28	214	1	48	12	173	2	108	38	120	25	4	0	178	34	0	39	156	114	85	118	239	60	0	21	1	0	0	0	0	50	146	71	42	2	55	0	80	67	0	89	197	29	103	93	69
YDR534C	1	14	4	5	3	1	5	135	25	0	5	7	6	4	0	0	1	4	0	0	10	11	1	13	22	0	0	16	2	0	0	0	0	0	27	35	11	0	22	0	13	22	0	0	24	6	9	20	15
YDR535C
YDR536W	5	1	0	0	6	0	0	1	33	0	7	1	1	0	1	0	0	0	0	0	11	3	0	4	1	0	0	0	0	0	0	0	0	0	1	0	3	0	114	0	0	8	0	5	6	0	0	0	11
YDR537C
YDR538W	30	19	17	4	81	0	43	20	48	5	6	24	69	6	8	0	53	24	0	4	19	35	10	34	21	11	0	10	0	0	0	0	0	41	65	51	17	0	13	1	7	29	0	24	75	34	64	28	15
YDR539W	48	27	10	11	102	0	46	10	50	8	14	34	58	8	8	0	74	14	0	72	67	77	43	34	59	8	0	8	0	0	0	0	0	14	40	103	16	0	14	3	10	79	0	28	59	6	26	23	43
YDR540C	29	6	9	0	23	0	1	1	27	0	7	6	6	0	2	0	50	0	0	3	22	23	15	12	10	0	0	2	0	0	0	0	0	7	6	22	0	0	9	0	0	13	0	8	20	5	32	0	28
YDR541C	28	26	28	10	44	2	31	13	153	1	14	18	82	4	8	0	47	14	0	28	3	20	7	29	28	5	0	6	0	0	0	0	0	37	97	74	40	1	8	1	19	32	1	26	127	13	27	0	30
YDR542W	0	1	0	0	1	0	0	0	0	0	0	0	0	0	0	0	0	0	0	0	0	0	0	0	0	0	0	0	0	0	0	0	0	0	0	0	0	0	0	0	0	0	0	0	0	0	0	0	0
YDR543C
YDR544C
YDR545W
YEL001C	110	98	37	12	159	0	262	83	87	12	55	102	505	20	55	0	202	166	0	154	162	169	108	180	124	17	0	63	0	0	0	0	0	43	119	295	300	6	105	4	61	114	1	95	154	51	103	99	118
YEL002C	148	143	48	32	237	4	260	46	227	12	63	69	649	30	50	0	216	126	0	198	195	242	151	179	178	48	0	73	3	0	0	0	0	71	122	435	286	11	89	15	89	136	0	91	196	44	198	112	162
YEL003W	178	172	33	31	241	2	206	93	110	8	75	54	328	22	46	1	137	151	0	166	72	264	113	122	175	34	0	33	0	0	0	0	0	45	65	217	195	4	33	18	19	180	0	87	104	55	175	64	191
YEL004W	16	22	11	1	33	0	28	21	34	5	8	15	55	5	7	0	53	7	0	33	16	31	7	36	12	4	0	8	0	0	0	0	0	12	62	47	31	0	13	2	58	25	0	18	54	5	12	7	8
YEL005C	27	17	14	7	30	1	16	13	56	4	15	21	21	2	1	0	35	6	0	10	9	23	16	20	21	7	0	6	1	0	0	0	0	8	78	24	14	3	12	7	44	26	0	19	64	6	38	8	12
YEL006W	27	21	17	13	83	0	13	6	101	0	23	21	49	0	6	0	61	6	0	15	42	58	30	61	36	16	0	4	0	0	0	0	0	21	80	65	29	1	11	0	32	23	0	6	56	7	31	22	37
YEL007W	174	133	35	7	149	0	152	16	56	8	58	23	226	15	33	0	122	66	0	58	133	235	121	98	186	29	0	25	0	0	0	0	0	58	71	329	249	9	39	1	42	192	0	117	76	20	156	87	174
YEL008W
YEL009C	1395	1189	151	138	743	14	889	185	338	72	458	179	2283	82	316	1	809	649	0	730	653	2062	572	921	1087	227	0	397	6	0	0	1	0	223	708	1649	1184	26	230	59	271	1516	0	670	602	188	1685	556	1610
YEL010W
YEL011W	185	100	117	25	183	4	5	0	207	3	72	27	19	17	5	0	270	13	0	11	178	110	196	50	188	41	0	6	0	0	0	0	0	61	105	14	21	3	78	0	145	165	0	16	218	27	126	99	41
YEL012W	272	270	116	98	339	8	122	16	316	16	252	77	154	23	19	4	167	80	0	80	272	251	318	112	459	97	0	28	3	0	1	1	0	117	314	190	71	12	203	23	141	269	0	39	248	85	269	255	206
YEL013W	36	28	15	0	97	0	21	11	7	9	16	19	48	2	7	2	111	15	0	29	36	37	38	18	24	5	1	4	0	0	0	0	0	16	30	38	27	2	16	4	26	29	0	70	21	19	73	14	25
YEL014C
YEL015W	80	58	35	22	146	0	112	28	138	5	32	20	268	12	31	0	136	81	0	69	42	96	62	110	65	26	0	33	3	0	0	0	0	33	150	263	173	1	65	14	78	78	0	65	238	33	95	41	91
YEL016C	87	101	13	16	147	0	64	8	186	0	47	35	195	17	22	0	99	59	0	47	94	140	77	158	72	20	0	18	2	0	0	0	0	17	156	145	86	3	92	8	70	114	0	40	247	36	69	32	100
YEL017W	107	142	50	26	226	3	119	32	136	4	76	25	247	25	24	0	204	118	0	95	309	200	127	171	161	67	0	19	1	0	0	0	0	52	194	344	174	3	105	8	79	174	0	153	145	51	156	119	194
YEL018W	104	77	64	18	185	2	289	82	289	14	49	50	496	17	66	4	342	182	1	208	129	202	86	185	133	17	0	32	4	0	1	1	0	36	215	497	407	3	98	18	45	123	1	125	210	43	110	77	75
YEL019C	1	1	0	0	0	0	2	0	0	0	0	0	0	0	0	0	0	0	0	0	0	0	2	0	0	0	0	0	0	0	0	0	0	0	0	4	1	0	0	0	0	11	0	0	5	0	1	1	4
YEL020C	63	49	30	31	73	0	46	12	88	4	23	24	98	5	12	0	103	37	0	33	11	69	50	42	66	18	0	10	1	0	0	0	0	31	134	84	60	3	60	1	81	46	0	18	99	17	51	31	80
YEL021W	1	0	0	0	1	0	0	0	0	0	0	0	3	0	0	0	0	0	0	0	0	1	0	0	0	0	0	0	0	0	0	0	0	0	0	0	0	0	0	0	0	2	0	0	1	0	6	3	0
YEL022W	39	58	14	5	80	0	57	12	85	0	32	18	195	12	9	0	37	65	0	76	34	90	48	67	48	23	0	18	0	0	0	0	0	23	89	254	132	0	18	19	0	63	0	43	57	10	103	29	62
YEL023C	12	5	7	7	77	0	7	0	2	0	7	2	3	0	3	0	12	3	0	11	0	9	0	10	7	1	0	4	0	0	0	0	0	9	40	20	5	0	1	0	17	26	0	0	44	4	0	1	8
YEL024W	37	67	58	8	166	0	12	10	10	0	42	30	41	1	10	0	65	3	0	13	46	74	13	14	47	14	0	13	1	5	0	0	0	50	21	48	2	0	8	2	20	48	0	85	8	14	73	46	44
YEL025C	94	57	40	15	113	0	37	15	129	1	14	19	63	8	22	0	102	19	0	58	63	84	39	32	72	10	0	13	0	0	0	0	0	29	122	83	30	1	10	1	37	88	0	16	83	24	103	39	45
YEL026W	442	482	56	31	348	5	1680	436	121	65	64	137	2683	13	236	1	381	1192	0	1063	328	833	271	543	272	54	0	217	3	0	0	0	1	31	258	1700	1421	18	253	136	78	694	1	303	228	66	337	185	536
YEL027W	1097	776	220	108	626	0	894	260	483	39	328	295	1652	75	225	0	918	554	3	684	842	1522	568	743	700	178	0	199	12	0	0	8	0	182	352	1317	836	26	253	79	181	1023	0	340	342	169	623	560	986
YEL028W
YEL029C	42	55	5	5	51	0	39	11	41	0	19	10	84	2	9	0	42	23	0	29	36	53	41	31	36	4	0	9	1	0	0	0	0	11	52	30	23	0	14	0	24	38	0	35	37	2	4	25	25
YEL030W	15	7	14	4	51	0	15	5	33	3	0	12	39	3	2	0	27	9	0	0	10	13	2	9	14	7	0	7	0	0	0	0	0	13	23	13	1	1	5	0	10	6	0	15	52	6	8	2	16
YEL031W	171	151	66	32	292	2	376	112	232	16	81	88	921	21	49	0	293	266	0	263	200	311	128	335	155	43	0	90	4	0	0	6	6	113	314	705	543	18	137	19	92	241	4	105	220	84	204	92	177
YEL032W	63	82	21	23	60	1	50	14	86	2	14	20	102	5	11	0	95	34	0	27	49	91	39	42	63	8	0	10	2	0	0	0	0	25	83	127	52	6	29	9	64	109	0	27	60	21	137	27	52
YEL033W
YEL034W	1606	1277	580	376	2485	22	2547	1316	851	273	852	809	4528	149	814	135	1700	1516	56	1362	1809	2082	631	1030	760	523	81	854	65	61	130	66	92	867	972	3005	2102	100	430	264	556	1591	146	1574	1050	673	1879	1310	1398
YEL035C	4	0	2	0	0	0	0	0	0	0	0	1	0	0	0	0	0	0	0	0	0	1	0	0	0	0	0	0	0	0	0	0	0	0	0	0	0	0	3	0	0	0	0	0	0	1	0	0	1
YEL036C	111	92	34	37	129	1	119	70	112	7	32	43	425	34	37	0	66	137	0	71	131	131	103	105	89	39	0	29	2	0	0	3	0	42	123	266	223	3	70	4	53	118	0	57	152	30	109	44	116
YEL037C	113	66	37	18	220	0	239	80	151	9	55	43	669	31	41	0	259	149	0	140	120	207	75	199	135	28	0	46	1	0	0	0	0	40	132	509	311	2	97	15	80	127	0	116	190	24	80	46	130
YEL038W	94	117	46	56	132	2	186	29	110	9	67	79	243	26	27	0	178	105	0	86	148	191	83	173	89	21	0	45	6	0	0	0	0	70	126	196	142	7	50	23	144	130	0	95	153	34	140	82	113
YEL039C	36	30	72	36	197	0	20	7	12	0	49	73	6	13	12	0	81	13	0	8	118	20	43	13	59	13	0	14	0	0	0	0	0	80	39	15	1	0	9	0	45	19	0	56	32	25	128	56	21
YEL040W	170	116	79	59	440	7	601	235	169	38	52	146	1355	46	184	0	426	383	0	473	197	225	129	590	135	30	0	170	1	0	0	0	0	167	381	1089	824	13	175	21	50	184	0	487	343	66	226	96	204
YEL041W	3	0	4	5	22	0	0	0	6	0	5	3	0	0	0	0	0	0	0	0	0	2	3	8	2	0	0	0	0	0	0	0	0	4	8	0	0	0	5	0	0	0	0	8	5	8	12	0	0
YEL042W	213	177	21	23	169	4	451	126	110	22	106	50	1128	50	94	0	152	366	0	231	158	288	134	335	175	68	0	123	1	0	0	0	0	51	105	960	737	8	62	35	49	246	0	205	288	39	290	119	219
YEL043W	74	69	24	29	170	3	130	49	107	9	49	43	275	19	28	0	150	97	0	46	46	182	55	127	111	37	0	58	1	0	0	0	0	43	139	328	258	6	51	7	64	137	0	95	187	54	108	67	72
YEL044W	148	75	56	14	152	0	176	46	220	9	57	33	351	25	36	0	116	132	0	131	89	144	140	176	126	31	0	41	1	0	0	0	0	56	195	395	238	2	146	8	56	67	1	103	283	60	99	55	109
YEL045C
YEL046C	11	1	1	3	20	0	8	8	11	1	2	13	35	2	8	0	13	3	0	15	1	19	8	24	3	1	0	15	0	0	0	0	0	4	14	49	27	0	0	0	7	4	0	32	28	1	2	5	10
YEL047C	82	44	11	7	63	0	76	3	47	9	28	10	112	2	8	0	99	34	0	47	56	82	27	73	69	8	0	6	2	0	0	0	0	9	78	61	46	5	36	9	35	74	0	1	62	9	92	24	72
YEL048C	0	0	0	0	0	0	4	1	0	0	0	0	3	0	1	0	1	3	0	0	0	1	0	0	0	0	0	1	0	0	0	0	0	0	2	0	0	0	0	0	0	0	0	0	0	0	0	0	0
YEL049W	3	0	3	2	0	0	0	0	16	0	0	0	0	0	0	1	0	0	0	0	5	10	4	6	6	3	0	0	0	0	0	0	0	0	0	0	0	0	0	0	1	9	0	0	0	0	6	2	5
YEL050C	40	45	21	3	101	3	73	26	30	0	16	21	196	8	26	0	44	43	0	75	25	77	38	87	57	17	0	33	0	0	0	0	0	25	95	135	73	2	13	1	2	62	0	117	50	35	88	35	31
YEL051W	382	218	115	26	459	5	373	67	359	13	168	82	1103	69	83	3	318	294	2	246	396	431	358	470	355	74	0	93	1	0	0	1	0	131	403	635	539	13	214	17	89	271	0	262	311	111	431	157	298
YEL052W	62	66	37	28	138	0	104	21	173	6	45	30	229	17	22	0	108	67	0	79	56	71	65	161	77	21	0	15	0	0	0	0	0	31	172	162	122	1	74	6	79	70	0	29	133	30	50	58	74
YEL053C	34	17	5	6	63	0	84	27	64	6	15	2	158	4	6	0	10	53	0	60	30	56	22	74	36	16	0	10	0	0	0	0	0	17	40	172	144	0	37	0	0	50	0	70	65	7	60	13	53
YEL054C	436	326	47	29	202	0	1606	601	128	54	102	143	3836	42	337	0	209	1266	0	1009	273	768	247	472	426	55	0	336	2	11	7	1	1	46	273	2254	2128	15	114	55	30	503	2	532	216	40	352	253	491
YEL055C	51	73	19	28	50	2	204	94	46	9	42	14	486	6	23	0	73	158	0	170	67	127	68	198	93	16	0	74	0	0	0	0	0	1	108	326	301	3	53	3	39	81	0	58	130	19	101	49	73
YEL056W	59	56	24	16	77	0	71	38	108	2	20	22	226	13	10	0	110	37	0	50	58	82	58	57	47	8	0	14	0	0	0	0	0	34	153	143	106	1	59	0	90	24	0	89	81	23	89	39	58
YEL057C	7	11	4	0	23	0	4	10	13	0	0	2	2	0	1	0	3	5	0	2	2	12	4	9	5	0	0	3	1	0	0	0	0	3	2	3	20	0	4	0	0	1	0	15	3	3	0	0	2
YEL058W	129	154	54	30	307	0	208	96	338	3	98	57	431	23	34	0	194	110	0	192	214	189	85	209	227	46	0	92	1	1	0	1	0	46	211	258	307	6	160	15	143	161	0	141	305	40	58	96	131
YEL059W
YEL060C	706	656	120	62	413	3	66	39	183	10	491	186	87	15	24	0	492	18	0	62	303	1098	322	122	483	195	0	20	13	0	0	0	0	101	256	79	20	1	123	16	190	942	0	26	133	85	316	381	752
YEL061C	98	108	14	6	67	3	112	28	67	13	63	25	211	16	17	0	61	80	0	24	109	120	113	113	138	18	0	25	0	0	0	0	0	27	62	233	99	2	39	1	0	129	0	26	139	31	144	62	144
YEL062W	47	68	14	6	25	0	12	7	71	0	22	16	29	3	1	0	65	7	0	14	13	76	21	11	42	10	0	3	1	0	0	0	0	14	67	27	48	1	0	3	14	64	0	0	77	3	38	15	60
YEL063C	531	452	67	36	411	8	88	29	314	7	591	96	239	71	66	0	380	54	0	107	642	790	403	323	1259	87	0	30	1	0	0	0	0	112	382	221	62	11	88	2	141	595	0	148	379	59	366	336	513
YEL064C	33	52	4	7	47	1	22	8	68	0	14	14	35	2	1	0	69	13	0	31	45	90	28	7	45	26	0	4	0	0	0	0	0	10	31	36	16	1	0	4	18	55	0	12	43	15	45	28	40
YEL065W	407	298	80	50	400	8	335	1	421	48	127	139	679	34	45	0	223	193	0	328	375	1417	204	378	373	93	1	91	8	0	0	1	0	141	462	437	281	2	101	53	41	435	0	123	359	94	420	94	375
YEL066W	314	247	41	40	208	1	57	19	231	4	204	66	146	24	24	0	234	36	0	47	405	452	299	173	361	106	0	36	5	0	0	0	0	65	169	131	70	1	190	13	169	252	0	85	231	85	211	211	409
YEL067C
YEL068C	60	47	19	6	98	0	53	8	124	5	25	22	136	14	11	0	143	40	0	80	54	80	31	26	35	8	0	16	0	0	0	0	0	18	49	97	37	0	42	4	64	38	0	3	105	9	27	22	60
YEL069C	0	0	0	0	0	0	4	0	8	0	0	0	0	0	0	1	0	0	0	0	0	0	0	0	0	0	0	0	0	0	0	0	0	0	1	0	0	0	0	0	0	0	0	0	0	0	0	1	1
YEL070W	0	1	2	0	2	0	0	0	0	0	2	0	0	0	0	0	1	0	0	0	0	0	0	1	2	0	0	0	0	0	0	0	0	0	1	0	0	0	0	0	11	0	0	0	0	0	0	0	0
YEL071W	536	398	338	189	1324	5	187	93	507	13	125	366	564	115	227	0	1025	168	0	166	595	710	361	1032	276	74	1	89	7	0	0	0	0	416	799	599	397	23	469	18	212	482	0	297	911	333	368	205	528
YEL072W	128	168	138	111	371	0	8	4	80	0	58	117	51	10	12	0	272	24	0	14	159	190	68	107	118	16	0	2	0	0	0	0	0	115	316	20	14	4	73	5	209	119	0	28	338	69	85	63	142
YEL073C	3	0	1	5	14	0	0	0	7	0	2	1	0	0	0	0	19	0	0	5	0	0	0	0	2	2	0	0	0	0	0	0	0	6	5	0	0	0	0	0	0	0	0	0	7	3	1	0	0
YEL074W
YEL075C
YEL076C
YEL077C
YER001W	260	165	45	28	388	8	162	51	305	14	121	96	276	31	58	0	216	87	0	157	315	268	193	349	241	63	0	85	2	0	0	0	0	104	284	339	198	6	22	5	49	246	1	218	198	68	384	145	176
YER002W	171	158	20	33	68	0	363	110	83	4	33	31	509	18	61	0	138	207	0	161	116	224	97	123	125	23	0	46	2	0	0	0	0	31	79	436	272	1	59	15	35	178	0	96	113	4	114	80	191
YER003C	228	202	56	25	369	1	305	63	82	16	117	87	773	28	69	0	259	269	0	226	189	248	115	332	159	66	0	87	0	0	1	0	0	79	167	607	354	9	188	13	34	224	0	182	167	60	264	143	232
YER004W	106	43	20	8	49	0	50	22	39	9	32	27	101	10	15	0	131	58	0	65	45	120	34	53	58	27	0	20	1	0	0	0	1	21	93	45	89	1	18	10	15	128	0	21	48	14	44	77	106
YER005W	44	54	19	6	64	0	32	10	133	0	13	19	68	5	6	0	78	19	0	34	43	63	31	38	24	6	0	5	1	0	0	0	0	16	82	96	45	0	31	2	53	66	0	6	77	9	63	30	51
YER006W	121	67	2	4	32	0	253	74	21	33	5	14	541	11	31	0	52	118	0	182	58	152	48	154	74	24	0	61	0	0	0	0	0	4	36	396	331	2	13	19	25	128	0	49	40	0	35	41	132
YER007W	12	17	6	12	23	0	14	9	23	0	11	4	25	0	2	0	10	4	0	22	13	22	24	6	19	0	0	5	0	0	0	0	0	7	25	27	14	0	3	0	4	16	0	8	22	5	12	2	15
YER008C	132	121	30	39	233	0	91	51	272	15	60	39	392	19	16	0	193	108	0	60	144	153	116	151	153	27	0	53	0	0	0	0	0	47	167	346	272	5	98	9	132	140	0	26	316	58	110	43	126
YER009W	818	698	248	85	749	7	1315	379	423	65	363	272	2711	52	279	0	598	1045	0	1055	741	968	455	687	687	201	0	291	11	0	1	0	0	231	467	2038	1419	11	263	49	273	598	1	574	488	150	642	484	715
YER010C	149	149	42	17	152	0	102	54	147	5	95	47	171	29	40	0	189	68	0	75	154	188	119	116	157	49	0	22	2	0	0	0	0	45	166	207	135	6	98	0	69	158	0	67	198	23	154	82	164
YER011W	1	1	0	0	0	0	36	61	10	4	0	4	51	0	2	0	3	11	0	23	0	0	0	1	0	0	0	7	0	0	0	0	0	0	7	53	19	0	13	0	4	11	0	8	8	0	0	0	6
YER012W	251	148	131	61	541	7	395	118	324	35	143	182	849	52	85	0	681	267	0	387	217	327	191	550	292	58	0	85	3	0	0	0	0	149	335	537	398	14	224	49	174	199	0	177	387	113	125	124	195
YER013W	31	43	8	0	19	0	20	4	20	4	8	5	61	2	12	0	31	7	0	43	37	46	27	2	34	2	0	2	0	0	0	0	0	9	20	25	40	0	2	9	22	50	0	7	21	5	44	12	22
YER014W	64	58	28	4	111	0	74	10	143	0	34	23	124	8	13	0	79	16	0	72	20	71	60	93	69	13	0	28	0	0	0	0	0	21	113	141	109	2	54	2	88	46	0	34	90	21	35	30	44
YER015W	55	31	71	8	48	0	0	8	50	4	17	8	58	1	4	0	54	8	0	5	15	64	50	8	28	11	0	4	0	0	0	0	0	21	61	31	22	0	10	9	31	28	0	0	79	9	13	8	69
YER016W	44	35	24	11	47	0	29	13	63	6	17	13	61	1	13	0	115	34	1	29	38	79	22	127	27	6	0	7	0	0	0	0	0	19	34	108	40	0	11	4	0	64	0	24	59	5	31	22	48
YER017C	85	54	45	18	192	0	55	50	120	9	51	58	143	5	21	0	142	61	6	57	56	164	78	82	67	12	3	30	0	1	0	1	0	41	78	137	117	8	24	4	13	98	3	54	140	50	98	63	83
YER018C	34	24	18	11	95	0	43	14	111	4	23	25	69	7	8	0	57	33	0	21	40	48	37	59	32	20	0	12	0	0	0	0	0	39	79	74	48	0	44	5	67	33	0	47	93	22	96	33	41
YER019W	90	83	57	39	151	1	78	32	186	10	40	33	202	19	15	0	166	62	0	59	128	95	47	87	65	32	0	32	0	0	0	0	0	39	237	102	90	4	115	4	30	75	0	28	255	35	65	48	69
YER020W	101	135	54	41	103	0	72	22	300	4	48	51	163	8	18	0	151	32	0	38	185	163	88	78	138	33	0	17	0	0	0	0	0	42	211	97	77	5	105	2	74	149	0	56	241	30	139	85	112
YER021W	244	165	134	66	602	10	343	90	393	24	120	107	700	36	63	0	428	234	0	270	296	317	184	454	260	57	0	67	3	0	0	0	0	149	389	610	503	5	249	24	199	265	0	111	423	104	166	168	241
YER022W	78	81	25	13	86	0	64	27	258	2	23	30	218	7	13	0	107	36	0	51	70	104	84	73	71	23	0	25	2	0	1	0	0	24	136	156	104	2	65	0	117	89	0	20	125	37	69	50	58
YER023W	163	166	61	34	245	0	198	55	114	9	124	78	500	29	90	0	255	153	0	144	363	287	186	190	225	59	0	57	0	0	0	0	0	98	147	290	247	13	51	16	120	230	0	155	141	49	224	105	210
YER024W	99	72	14	13	37	3	22	16	154	0	16	24	45	40	25	0	116	17	0	24	74	135	60	242	78	6	0	7	0	0	0	0	0	14	128	37	17	1	191	3	54	64	0	55	175	29	30	48	110
YER025W	285	183	17	6	64	5	265	111	145	8	55	37	429	10	49	0	120	172	0	212	82	365	88	185	124	37	0	50	1	0	0	0	0	37	89	313	248	4	55	4	35	246	0	59	67	34	162	79	254
YER026C	154	166	121	39	795	1	109	31	184	3	135	178	205	37	94	0	424	66	0	110	298	250	150	327	230	74	0	56	3	0	0	0	0	205	182	148	123	8	189	3	274	152	0	303	199	130	194	111	109
YER027C	137	83	54	22	346	1	105	37	147	7	60	78	268	12	21	0	246	109	0	120	122	104	68	193	148	34	0	35	0	0	0	0	0	51	189	250	212	1	91	2	70	84	0	89	211	41	49	80	91
YER028C	48	56	6	12	45	0	59	11	83	0	18	11	77	5	8	0	64	33	0	17	25	85	69	43	102	8	0	15	1	0	0	0	0	6	63	89	46	0	1	1	63	95	0	24	103	7	76	23	107
YER029C	67	56	45	12	92	1	66	35	54	6	26	31	136	5	14	0	89	54	0	69	66	85	37	68	71	18	0	13	1	0	0	0	0	31	62	104	87	0	67	1	47	59	0	41	60	21	74	48	67
YER030W	318	230	72	69	288	4	384	90	177	39	127	130	720	58	84	0	306	293	0	193	134	358	200	294	254	62	0	61	2	0	0	0	0	117	244	409	313	3	138	61	112	238	0	194	293	121	141	202	255
YER031C	194	219	91	61	445	3	290	94	214	18	122	99	697	41	65	0	336	237	0	250	250	303	196	281	179	48	0	118	1	0	0	0	0	88	315	567	454	6	138	18	110	261	0	175	354	54	264	144	194
YER032W	44	64	28	17	74	1	60	14	58	2	28	18	75	10	12	0	36	24	0	34	75	55	37	32	55	22	0	10	0	0	0	0	0	12	19	106	55	1	40	0	28	78	0	77	51	3	38	25	82
YER033C	50	33	7	9	28	0	22	6	28	0	4	10	18	0	6	0	36	21	0	25	49	51	30	14	46	16	0	5	0	0	0	0	0	14	43	50	15	0	0	0	48	58	0	4	50	9	40	12	45
YER034W	62	57	11	6	101	0	39	13	33	1	19	23	117	3	3	0	60	20	0	25	26	68	50	32	62	9	0	15	0	0	0	0	0	32	102	98	42	1	26	3	34	46	0	33	95	23	17	24	59
YER035W	146	147	40	13	96	0	37	16	48	6	43	52	44	8	10	0	167	10	0	43	64	227	94	26	105	23	0	9	1	0	0	0	0	35	68	84	26	1	47	7	115	187	0	33	71	38	129	64	153
YER036C	271	221	33	17	240	0	624	205	345	33	75	57	1750	48	82	0	143	485	1	262	211	438	241	400	219	58	0	184	2	1	0	0	1	22	233	1463	1117	8	133	34	130	291	0	149	304	54	230	100	254
YER037W	89	50	27	18	135	2	3	0	59	2	63	42	6	4	11	0	69	1	0	4	155	81	85	59	209	29	0	9	1	0	0	0	0	20	77	51	0	7	10	0	39	68	0	42	54	16	126	38	61
YER038C	3	6	1	0	4	0	0	0	6	0	0	7	0	0	0	0	13	2	0	0	0	12	1	5	2	0	0	0	0	0	0	0	0	0	0	4	0	0	0	0	1	3	0	0	1	0	0	0	3
YER039C	32	27	16	6	38	0	3	0	87	1	10	10	25	10	6	0	36	19	0	28	36	28	10	11	45	1	0	5	1	0	0	0	0	8	47	31	15	2	32	3	18	23	0	23	60	12	24	22	12
YER040W	74	55	14	16	95	0	37	6	102	5	35	16	124	17	17	0	56	32	0	68	70	91	68	134	86	9	0	3	2	0	0	0	0	46	114	57	66	1	23	7	10	78	0	71	155	11	104	32	94
YER041W	18	41	20	5	62	0	11	12	62	0	17	13	38	6	2	0	33	11	0	28	37	25	36	33	24	0	0	7	1	0	0	0	0	17	45	32	35	1	12	1	25	29	0	3	49	2	11	18	36
YER042W	312	199	583	242	2104	5	135	100	3801	2	69	536	530	24	81	0	1197	107	0	200	187	257	108	592	226	26	0	42	13	0	5	0	0	528	1920	239	199	19	209	12	645	273	0	150	1618	327	172	89	189
YER043C	1261	974	420	267	2360	16	1777	790	872	146	600	474	3956	212	836	6	1150	1209	1	1291	1427	1928	862	1958	918	342	2	556	36	1	2	8	0	655	1032	3503	2720	62	709	125	512	1495	7	1537	1081	482	1248	911	1190
YER044C	193	147	316	109	1095	0	151	184	283	25	143	155	414	27	114	0	297	99	0	74	318	216	117	235	132	86	0	86	0	0	0	0	0	189	146	317	184	5	153	5	160	135	0	173	248	200	189	145	180
YER045C	58	53	16	6	45	0	25	15	31	0	15	11	18	3	18	0	25	15	0	19	5	100	37	48	45	6	0	7	0	0	0	1	0	9	31	54	31	5	0	3	13	58	0	1	48	13	19	7	40
YER046W	103	68	70	33	108	7	79	28	159	29	64	36	118	20	16	26	168	54	5	49	139	111	52	92	109	30	10	9	2	5	11	12	15	47	141	97	60	8	34	34	80	89	8	20	161	58	164	56	100
YER047C	56	48	6	4	33	0	32	3	39	7	12	11	65	2	3	0	28	16	0	8	65	78	38	61	68	6	0	4	0	0	0	0	0	13	18	68	34	0	13	0	26	58	3	30	36	28	103	11	73
YER048C	120	75	58	16	160	2	156	50	162	3	61	45	409	33	30	0	189	99	0	142	76	128	106	226	125	34	0	51	1	0	0	0	0	59	181	395	226	8	112	7	27	117	0	90	147	57	69	91	104
YER049W	130	119	23	7	63	3	191	122	108	6	28	33	591	11	56	0	58	170	0	142	153	237	89	175	76	15	0	80	2	0	0	0	0	9	127	538	434	2	84	48	29	120	0	153	84	30	102	53	156
YER050C	151	95	105	23	311	0	192	85	172	6	50	89	364	22	84	0	256	157	0	190	165	209	79	211	160	49	0	53	1	0	0	1	0	109	235	296	246	3	105	6	107	113	0	173	240	50	184	102	78
YER051W	30	25	14	10	38	2	54	2	64	3	16	13	65	0	9	0	41	23	0	28	51	46	34	46	32	4	0	5	0	0	0	0	0	18	69	71	40	1	25	0	23	34	0	6	90	1	19	12	19
YER052C	385	358	182	106	621	1	256	50	630	15	158	100	385	104	212	0	363	176	0	127	288	611	276	673	423	42	3	112	4	0	0	0	0	183	406	381	241	16	140	15	227	366	2	531	587	117	216	163	371
YER053C	106	101	112	60	309	1	31	12	271	1	70	75	40	25	24	0	360	14	0	32	110	147	104	135	225	32	0	13	2	0	0	0	0	89	223	59	38	0	33	4	347	134	0	33	226	79	149	78	34
YER054C	25	21	21	4	24	0	13	3	43	2	12	22	20	10	3	0	43	2	0	3	14	21	43	5	58	10	0	3	3	0	0	0	0	0	23	10	11	1	24	4	16	11	0	7	27	4	29	7	23
YER055C	515	395	202	132	887	4	695	118	723	40	242	224	1892	159	416	0	578	674	0	547	672	693	365	1279	600	76	0	194	8	0	0	1	0	202	889	1090	977	11	310	36	96	475	0	1271	732	115	540	239	406
YER056C	1668	1324	59	50	559	16	689	283	429	36	260	123	2013	124	266	0	594	586	0	352	1028	2900	1504	1535	1014	175	0	165	5	0	0	0	0	120	518	1505	997	16	378	45	244	2106	1	514	646	85	1084	478	1786
YER057C	457	375	109	58	427	1	313	86	315	14	215	136	605	42	99	0	391	206	0	178	404	513	365	400	535	113	0	67	3	0	0	0	0	103	292	646	393	6	293	18	84	467	0	301	360	104	376	245	422
YER058W	66	30	39	23	122	0	39	16	111	7	15	30	58	1	34	0	96	45	0	19	49	59	23	70	41	12	0	23	0	0	0	0	0	33	99	96	74	0	25	1	75	23	0	80	104	22	54	41	24
YER059W	77	44	28	23	125	1	46	7	87	4	34	34	108	12	6	0	54	15	0	41	104	62	70	43	72	42	0	8	1	0	0	0	0	23	148	83	87	2	19	0	49	67	0	16	80	32	103	21	74
YER060W	49	57	0	0	11	0	53	18	34	5	33	5	52	3	3	0	37	5	1	36	54	53	92	50	18	15	0	3	0	0	0	0	0	4	7	134	21	0	109	0	15	81	0	32	30	2	4	28	133
YER061C	31	38	34	18	76	4	16	17	95	8	20	15	55	0	9	0	22	35	0	14	70	52	48	71	35	5	0	7	1	0	0	0	0	29	154	34	33	1	9	0	21	31	0	21	109	15	21	17	80
YER062C	303	301	65	52	218	0	65	17	200	1	18	65	44	17	24	0	351	27	0	78	81	364	196	133	151	24	0	37	1	1	0	0	0	63	86	201	41	6	428	8	156	389	0	75	171	37	75	51	210
YER063W	156	105	68	49	251	6	143	39	208	11	77	75	276	52	36	0	230	85	0	54	167	205	138	227	121	29	0	33	2	0	0	0	0	91	199	221	130	5	100	13	141	144	1	52	224	46	183	98	167
YER064C	34	50	19	3	26	0	256	51	58	27	13	11	649	32	23	0	85	129	0	100	75	85	33	114	44	5	0	66	0	0	0	0	0	6	46	520	241	3	15	9	17	60	0	111	27	14	39	15	49
YER065C	31	14	7	3	13	0	11	3	54	0	2	2	35	0	2	0	17	5	0	6	34	32	5	12	22	2	0	5	0	0	0	0	0	5	39	24	2	0	36	3	15	27	0	15	35	4	30	18	19
YER066W	17	15	38	5	67	0	1	1	61	0	16	14	6	4	1	0	66	6	0	0	29	17	17	21	27	11	0	5	0	0	0	0	0	13	82	10	2	0	17	0	38	14	0	0	107	6	32	6	21
YER067W	86	66	103	12	113	4	27	1	88	0	70	16	69	10	0	0	108	16	0	2	102	63	34	17	145	20	0	0	5	0	0	0	0	22	60	31	23	0	219	3	132	52	0	35	30	5	150	46	22
YER068W	79	48	12	7	71	0	58	15	44	4	20	22	168	7	5	0	88	25	0	28	90	102	51	28	62	20	0	5	1	0	0	0	0	25	21	118	77	3	65	0	29	81	0	39	37	18	41	35	53
YER069W	1906	1637	467	305	1871	19	94	27	2167	10	497	459	161	252	836	0	1288	67	0	201	1217	1985	938	2288	1599	180	0	89	21	0	0	0	0	613	2005	103	136	31	597	5	369	1737	1	903	2540	445	633	568	1687
YER070W	186	122	23	27	321	0	253	105	91	6	77	69	623	11	49	0	503	222	0	364	68	250	88	333	147	47	0	88	5	0	0	0	0	104	142	362	264	4	103	15	26	670	0	104	354	87	202	135	209
YER071C	83	53	22	11	83	0	50	24	48	1	10	24	57	6	20	0	96	44	0	29	38	76	43	12	89	17	0	8	0	0	0	0	0	20	100	108	90	0	7	4	57	68	0	32	62	38	66	28	53
YER072W	1126	660	157	93	793	5	1416	181	861	51	275	309	2647	165	240	0	1192	1166	0	785	656	1625	696	1914	996	131	0	156	6	0	0	0	0	190	1317	5127	1333	27	865	94	360	1040	0	453	1265	152	458	382	1225
YER073W	688	456	60	54	76	5	353	76	632	24	41	47	620	85	123	1	223	335	0	275	277	971	284	562	411	31	0	72	2	0	0	0	0	49	371	547	420	8	103	50	44	708	1	365	523	31	180	137	711
YER074W	391	281	70	53	290	3	1903	653	196	74	100	139	3751	79	317	24	212	1528	2	978	322	564	328	542	430	89	2	336	0	10	6	14	10	72	367	2162	1873	14	139	93	43	382	6	417	296	73	476	301	318
YER075C	100	81	7	7	26	0	58	19	67	1	30	9	98	6	4	0	9	48	0	23	47	136	78	67	50	6	0	7	0	0	0	0	0	3	28	102	66	0	35	10	0	43	0	6	68	6	27	13	102
YER076C	14	8	5	2	28	0	17	2	68	0	2	10	19	5	0	0	25	2	0	12	5	27	10	20	12	0	0	4	0	0	0	0	1	14	68	30	3	1	4	2	14	12	0	2	30	0	2	6	5
YER077C	10	14	4	0	0	0	19	5	4	1	3	6	11	3	0	0	12	5	0	4	0	13	0	11	9	0	0	8	0	0	0	0	0	1	6	20	10	0	1	4	0	11	0	2	9	1	0	4	17
YER078C	64	41	23	19	63	0	69	17	55	2	19	32	136	8	12	0	72	47	0	45	53	53	35	64	43	6	0	17	1	0	0	0	0	34	61	99	55	2	21	11	60	47	0	82	73	19	16	28	34
YER079W	206	212	59	26	209	0	47	4	209	6	84	70	53	18	23	0	152	13	0	5	142	222	140	104	218	50	0	3	4	0	0	0	0	65	188	61	42	2	111	4	117	251	0	62	127	42	144	133	206
YER080W	120	78	21	26	135	0	120	28	96	3	55	46	260	14	9	0	150	83	0	55	103	145	106	119	88	17	0	28	0	0	0	0	0	19	163	206	152	2	31	6	53	115	0	41	114	27	113	52	130
YER081W	159	103	23	12	168	3	31	9	343	12	23	28	53	61	24	0	254	21	0	67	133	274	55	449	58	12	0	4	0	0	0	0	0	28	249	49	11	5	40	15	45	141	0	34	288	25	20	48	101
YER082C	54	37	9	2	23	1	121	63	52	11	6	12	263	17	30	0	38	88	0	124	15	79	30	95	60	12	0	30	0	0	0	0	0	11	46	179	156	3	46	8	13	81	0	44	69	5	21	25	102
YER083C	161	140	43	11	113	0	160	48	198	4	82	83	281	17	39	0	261	67	0	79	117	245	117	143	116	49	0	32	4	0	0	0	0	38	290	261	230	1	81	6	142	144	0	99	173	75	85	84	170
YER084W	35	35	5	6	7	0	4	0	14	0	37	1	23	1	2	0	3	5	0	14	55	24	36	31	52	24	0	1	0	0	0	0	0	5	39	11	9	0	0	1	36	31	0	0	0	10	13	48	43
YER085C	1	0	2	2	0	0	0	1	30	0	0	0	0	0	0	0	5	0	0	0	0	0	0	5	0	3	0	0	0	0	0	0	0	5	18	0	0	0	0	0	0	3	0	0	6	0	0	7	1
YER086W	296	240	54	27	211	2	317	63	183	11	97	74	733	68	180	0	200	199	0	312	260	397	231	419	240	35	0	117	0	1	0	0	0	100	326	592	476	12	95	22	38	357	0	394	312	74	191	151	264
YER087W	15	18	23	10	63	0	17	13	23	1	22	18	80	5	11	0	37	26	0	18	55	47	14	55	14	6	0	3	0	0	0	0	0	20	81	66	65	1	24	0	33	28	0	6	49	20	58	25	31
YER088C	227	154	65	10	121	4	115	31	317	12	78	80	246	21	19	0	143	95	0	40	155	252	157	96	137	47	0	19	0	0	0	0	0	39	320	232	210	4	52	9	161	215	0	85	244	25	153	36	169
YER089C	153	141	76	31	286	6	358	63	333	29	74	71	709	80	53	0	287	220	0	211	121	278	142	344	162	28	0	85	5	0	0	0	0	69	319	504	435	6	109	44	162	225	0	188	247	60	126	111	176
YER090W	231	239	44	24	145	3	247	27	214	8	62	60	479	63	130	2	209	123	0	272	281	275	108	350	187	45	0	78	3	0	0	0	0	65	219	344	304	6	80	19	35	237	0	390	253	39	83	102	200
YER091C	314	227	257	113	949	1	51	4	243	8	173	288	66	46	164	7	1171	41	0	45	311	455	147	638	189	61	0	12	11	0	2	0	0	379	649	44	64	23	104	1	218	390	0	175	575	253	92	133	321
YER092W	63	79	251	154	606	0	53	27	520	0	28	147	117	6	20	0	429	42	0	54	90	98	34	166	68	9	0	16	1	0	0	0	0	219	761	96	109	1	89	0	478	71	0	29	805	126	53	39	43
YER093C	33	49	22	10	37	0	42	12	65	0	24	18	137	2	8	0	66	12	0	11	28	69	54	48	35	21	0	10	1	0	0	0	0	28	70	75	69	3	10	9	57	31	0	14	79	4	37	15	64
YER094C	225	225	151	94	698	0	337	130	559	19	125	176	1106	70	70	0	680	272	0	255	232	409	180	550	357	87	0	144	3	3	2	1	0	215	670	818	537	21	195	22	257	264	3	236	599	171	233	171	212
YER095W	79	81	41	13	207	0	90	20	115	5	66	44	94	2	14	0	162	45	0	52	75	91	49	129	48	13	0	40	0	0	0	0	0	53	93	68	81	1	21	3	24	329	0	33	248	59	99	59	68
YER096W	21	18	2	3	13	0	0	1	25	0	12	6	8	7	1	0	20	0	0	6	36	16	18	9	12	21	0	0	0	0	0	0	0	0	27	4	11	0	5	0	4	29	0	0	33	0	8	3	9
YER097W
YER098W	7	3	8	0	31	0	8	0	4	0	9	5	23	1	0	0	13	2	0	2	7	3	2	0	11	0	0	0	0	0	0	0	0	3	33	4	3	1	3	0	14	10	0	11	4	1	8	2	4
YER099C	79	71	28	11	59	0	50	50	112	2	48	45	253	9	22	0	134	72	0	30	59	73	61	84	63	3	0	26	0	0	0	0	0	13	151	118	64	1	88	1	145	56	0	55	114	18	71	27	60
YER100W	74	59	23	17	72	0	85	22	84	0	26	29	142	3	14	0	63	50	0	20	33	91	55	83	94	12	0	11	0	0	0	0	0	20	103	128	102	0	64	1	54	53	0	30	85	18	49	26	80
YER101C	29	15	28	9	73	0	9	11	45	5	10	9	39	3	2	0	12	20	0	21	13	31	31	3	33	8	0	8	0	0	0	0	0	11	85	27	34	0	25	0	55	39	0	8	77	13	27	19	36
YER102W	812	605	71	55	365	3	2506	813	267	170	192	156	4953	85	455	10	244	1771	0	1226	624	1004	407	653	606	150	1	481	5	0	0	0	1	120	361	3208	2781	8	259	187	39	751	0	833	285	99	630	395	583
YER103W	59	40	14	18	53	3	27	8	234	5	30	22	98	2	4	0	39	21	0	23	9	52	68	96	112	6	0	14	0	0	0	0	0	17	59	70	46	4	303	2	91	64	0	9	71	17	54	36	59
YER104W	8	7	6	8	7	0	6	2	55	0	4	6	14	3	1	0	49	7	0	3	23	9	2	14	11	6	0	7	0	0	0	0	0	3	51	23	4	0	26	0	19	16	0	3	6	6	18	2	15
YER105C	59	91	26	17	242	0	177	35	131	3	27	29	323	21	24	0	93	69	0	112	84	156	78	131	151	13	0	23	0	0	0	0	0	28	184	302	273	7	49	9	90	78	0	27	240	45	145	99	102
YER106W	0	3	4	0	0	0	0	0	0	0	0	5	16	0	0	0	0	3	0	5	11	8	0	0	3	2	0	1	0	0	0	0	0	0	2	14	8	0	0	0	0	10	0	0	19	0	18	0	0
YER107C	54	46	15	10	91	0	78	20	100	5	25	34	159	7	15	0	95	51	0	48	70	49	38	133	75	19	0	19	0	0	0	0	0	22	135	167	142	0	36	1	60	38	0	73	111	9	87	30	60
YER109C
YER110C	136	191	12	5	25	0	392	82	52	36	65	27	734	13	32	9	33	286	0	369	124	329	83	122	84	39	0	82	2	4	0	3	1	13	62	584	417	6	49	25	1	230	0	58	88	9	156	91	199
YER111C	37	23	10	10	71	0	39	1	44	4	15	11	27	2	3	0	96	32	0	15	32	55	15	28	20	6	0	2	1	0	0	2	0	14	31	33	18	0	0	1	7	30	0	1	9	6	23	15	40
YER112W	166	119	70	29	186	1	331	66	130	15	85	54	507	25	55	0	212	235	0	137	123	273	148	166	130	36	0	39	5	0	0	0	0	78	218	357	359	3	61	31	93	177	0	114	255	83	159	109	110
YER113C	41	56	28	9	43	0	69	44	68	2	24	29	170	15	9	0	60	70	0	66	39	74	44	53	53	15	0	19	0	0	0	3	0	38	32	130	135	0	30	4	50	46	0	45	83	16	77	38	58
YER114C	101	64	11	10	60	0	61	14	60	0	24	19	110	3	11	0	45	22	0	23	54	125	61	40	74	19	0	3	0	0	0	0	0	20	49	113	63	1	11	3	28	140	0	28	39	6	52	44	108
YER115C	105	37	13	6	48	1	81	20	67	4	28	16	136	13	14	0	79	39	0	27	65	65	51	97	34	10	0	5	0	0	0	0	0	22	46	99	52	2	26	1	38	68	0	14	60	7	30	31	56
YER116C	5	5	3	0	25	0	5	3	44	0	1	6	6	0	1	0	2	3	0	14	2	4	2	22	7	4	0	0	2	0	0	0	0	7	7	4	12	0	2	0	7	11	0	18	33	2	0	1	4
YER117W	1254	1040	160	152	807	8	4446	1377	770	270	500	326	11776	240	922	12	580	3834	0	2876	1402	1588	1151	1465	1496	301	4	857	24	8	8	6	3	213	887	7120	6912	23	622	303	213	1345	4	1410	852	195	1612	840	1031
YER118C	74	49	13	6	109	0	127	37	86	9	23	37	237	25	20	0	148	98	0	119	81	89	57	103	46	28	0	43	0	0	0	0	1	16	81	247	121	2	55	11	41	83	0	46	81	41	46	47	95
YER119C	114	93	52	23	132	0	39	7	127	1	88	79	87	26	19	0	186	33	0	16	118	150	136	98	141	49	0	17	3	0	0	0	0	40	125	110	76	1	58	2	80	136	0	26	198	46	128	38	116
YER120W	484	379	113	91	459	10	549	132	243	45	229	155	1193	62	97	0	483	417	0	387	481	643	276	427	394	121	0	141	4	1	0	0	0	189	425	889	769	14	210	28	163	523	1	350	430	161	330	300	528
YER121W	35	22	16	0	12	0	24	6	26	6	14	17	21	6	0	0	60	18	0	14	8	29	24	19	40	5	0	0	0	0	0	0	0	9	29	13	5	0	9	4	33	31	0	2	17	12	34	16	16
YER122C	107	105	34	16	97	1	109	38	59	9	39	25	190	15	36	0	71	55	0	117	72	156	52	112	45	20	0	16	4	0	0	0	0	19	71	134	101	1	41	12	16	86	0	91	106	10	74	70	63
YER123W	9	5	2	4	4	0	10	4	11	0	6	4	7	1	4	0	37	15	0	14	1	16	8	7	13	2	0	2	0	0	0	0	0	3	9	20	31	0	12	0	12	15	0	1	8	5	3	4	14
YER124C	145	105	27	13	156	2	86	4	218	3	16	27	143	7	4	0	248	0	0	23	37	324	80	103	48	4	0	6	1	0	0	0	0	20	166	130	75	4	26	4	87	138	0	30	203	14	189	9	141
YER125W	16	17	7	13	23	0	6	5	4	0	10	14	11	1	2	0	29	3	0	28	4	7	8	4	3	4	0	1	0	0	0	0	0	3	30	24	10	0	0	4	0	18	0	2	0	9	18	6	27
YER126C	111	115	8	3	31	0	150	87	22	15	10	19	230	1	16	0	71	150	0	113	87	176	67	55	46	11	0	30	0	0	0	0	0	8	42	227	187	0	34	9	7	139	0	47	19	2	52	35	105
YER127W	44	45	2	2	23	0	130	76	34	18	10	25	309	13	15	0	140	95	0	64	31	98	43	96	51	10	0	46	0	0	0	0	0	11	59	271	127	5	28	6	25	67	0	70	82	6	54	19	50
YER128W	28	34	9	1	55	0	33	5	34	1	20	15	65	11	25	0	38	9	0	41	21	69	35	52	29	8	0	10	2	0	0	0	0	23	46	64	20	0	0	0	33	63	0	72	47	7	82	22	56
YER129W	81	101	17	18	114	0	77	47	75	3	21	41	138	10	18	0	117	26	0	46	52	117	56	127	82	12	0	23	0	0	0	0	0	14	128	119	106	4	24	0	56	108	2	19	85	19	75	29	99
YER130C	31	29	23	1	65	0	43	16	31	8	15	4	61	4	7	0	29	20	0	42	24	55	30	26	48	4	0	5	0	0	0	0	0	3	19	59	48	0	30	0	24	26	0	12	26	4	8	10	46
YER131W	718	680	41	48	289	5	2542	874	215	152	230	175	4031	44	438	1	182	1797	0	1225	533	1018	368	673	668	149	0	472	9	2	0	0	0	72	330	3172	2402	14	198	177	65	818	2	912	253	89	668	443	576
YER132C	66	74	3	15	10	0	31	20	63	0	10	10	111	4	21	0	33	29	0	89	33	78	21	38	49	14	0	5	0	0	0	0	0	16	21	56	74	2	17	1	2	89	0	45	28	3	1	15	69
YER133W
YER134C	62	56	38	5	136	0	40	26	56	1	11	40	115	8	12	0	126	10	0	33	62	64	21	64	69	24	0	12	1	0	0	0	0	28	91	61	63	3	11	3	77	45	0	36	50	25	76	29	37
YER135C	0	1	2	0	0	0	0	0	0	0	0	0	0	0	0	0	0	0	0	0	0	0	0	0	0	0	0	0	0	0	0	0	0	0	1	0	0	0	0	0	0	0	0	0	0	0	0	0	0
YER136W	171	152	50	12	156	0	92	35	94	3	63	42	156	23	19	0	346	39	0	108	138	314	104	140	104	23	0	16	2	0	0	0	0	59	162	113	58	6	66	2	84	231	0	60	162	33	88	54	248
YER137C	68	63	24	11	28	0	66	49	136	3	18	36	206	18	25	0	92	59	0	56	56	129	94	104	62	11	0	23	5	0	0	0	0	5	145	175	115	1	52	3	72	74	0	77	100	20	107	35	99
YER138C
YER139C	7	0	4	2	20	0	0	0	6	0	1	3	13	0	2	0	18	0	0	0	0	4	8	10	1	0	0	2	1	0	0	0	0	3	51	12	2	0	0	0	20	2	0	0	19	2	0	0	12
YER140W	73	37	8	7	14	1	24	15	101	2	21	19	58	2	10	0	54	34	0	45	18	73	48	62	62	9	0	5	2	0	0	0	0	9	55	71	90	1	21	0	27	49	0	33	72	18	69	23	42
YER141W	104	68	49	20	153	0	65	17	96	7	50	28	110	6	20	0	192	45	0	58	99	86	42	53	59	22	0	11	0	0	0	0	0	55	70	54	64	1	44	8	24	64	0	56	125	57	63	65	56
YER142C	63	40	36	7	51	0	18	11	124	2	6	17	85	8	8	0	177	13	0	9	32	78	47	65	75	9	0	8	1	0	0	0	0	15	98	40	27	1	14	1	78	40	0	0	145	30	40	25	51
YER143W	112	87	41	19	113	0	100	18	167	7	74	58	241	14	10	0	82	59	0	66	126	93	67	116	133	31	0	27	1	0	0	0	0	53	206	188	117	1	80	14	121	98	0	98	221	84	58	67	96
YER144C	80	41	28	6	82	0	30	29	84	0	55	17	100	4	13	0	113	36	0	47	27	60	53	68	61	6	0	16	0	0	0	0	0	7	101	97	149	3	36	1	42	57	0	1	65	13	18	30	69
YER145C	427	294	88	56	562	9	395	50	287	41	97	107	887	20	105	0	178	227	0	248	343	1294	216	282	456	101	0	91	2	0	0	0	0	157	238	531	310	11	109	31	97	467	0	148	293	91	501	126	455
YER146W	84	71	33	11	117	2	187	56	75	2	57	49	381	9	33	0	152	133	0	103	52	128	114	136	126	17	0	20	2	0	0	0	0	26	87	335	230	8	38	12	22	112	0	26	109	18	95	46	79
YER147C	22	32	11	34	96	0	16	6	110	1	7	21	67	4	4	0	69	41	0	13	31	22	17	52	37	9	0	4	0	0	0	0	0	18	91	62	39	1	30	2	22	17	0	11	80	7	18	18	29
YER148W	152	169	49	22	235	3	229	88	217	19	60	72	561	20	53	0	226	216	0	126	215	289	104	198	159	44	0	45	0	1	2	0	0	45	129	420	332	5	68	7	33	215	0	76	167	31	192	105	173
YER149C	39	22	5	9	26	0	49	26	29	3	22	15	102	14	17	0	36	31	0	41	40	44	9	53	37	7	0	8	0	0	0	0	0	7	71	52	60	3	57	1	9	66	0	31	63	5	57	23	32
YER150W	71	109	8	5	19	0	5	2	109	0	9	7	10	1	0	0	80	1	0	21	38	158	77	36	155	8	0	4	0	0	0	0	0	1	35	13	12	1	325	0	124	109	0	0	29	5	48	38	58
YER151C	77	97	18	8	78	0	122	31	31	10	24	25	341	18	22	0	107	93	0	100	113	149	67	67	88	17	0	36	1	0	0	0	0	28	99	318	250	4	44	4	38	134	0	55	94	10	97	65	91
YER152C	152	93	42	37	179	0	90	22	264	8	71	52	229	29	17	0	211	64	0	40	128	190	151	185	145	41	0	16	2	0	0	0	0	55	286	273	147	5	105	3	133	149	0	62	287	31	166	87	146
YER153C	0	0	0	0	0	0	0	0	6	0	0	0	0	0	0	0	0	0	0	14	0	0	0	0	0	0	0	0	0	0	0	0	0	0	6	0	0	1	0	0	0	0	0	0	0	0	0	0	0
YER154W	57	55	30	16	89	1	136	53	79	1	30	21	341	19	21	0	85	57	0	47	100	93	66	140	101	28	0	36	0	0	0	0	0	24	69	203	219	0	38	10	41	65	0	54	137	15	81	40	71
YER155C	95	72	32	19	113	1	112	16	49	0	54	32	191	22	24	0	106	70	0	75	51	139	82	99	84	10	0	14	1	0	0	1	0	32	78	210	175	4	9	1	21	94	0	64	112	22	105	30	69
YER156C	99	85	10	20	141	4	205	69	104	6	41	34	658	19	58	0	106	206	0	148	68	158	104	234	113	26	0	95	3	0	0	0	0	50	112	581	414	6	74	15	42	108	0	72	129	21	144	69	132
YER157W	48	20	20	1	59	0	43	12	77	2	16	7	78	4	11	0	16	29	0	14	15	38	30	42	47	15	1	14	0	0	0	0	0	12	47	46	45	1	18	6	20	39	0	7	120	17	11	8	26
YER158C	118	94	20	1	50	0	22	7	32	0	51	3	23	4	4	0	27	9	0	10	45	134	89	18	126	31	0	6	0	0	0	0	0	11	60	36	18	0	23	2	70	134	0	8	54	1	63	44	135
YER159C	571	449	108	69	394	4	346	137	324	18	170	108	565	67	71	0	440	236	0	486	323	802	520	374	452	117	0	55	7	0	0	0	0	133	456	537	426	8	214	13	233	633	1	161	523	100	587	281	516
YER160C
YER161C	54	64	29	12	100	0	98	34	157	11	22	10	176	30	8	0	98	52	0	66	33	105	42	64	49	9	0	14	1	0	0	0	0	22	93	157	147	0	27	14	56	62	0	15	73	41	94	33	40
YER162C	25	26	14	3	88	0	13	3	102	0	11	11	56	1	5	0	50	6	0	29	57	48	31	64	60	5	0	3	0	0	0	0	0	20	113	34	26	3	23	0	33	28	0	31	96	13	26	20	38
YER163C	78	49	85	60	203	0	78	26	258	4	72	73	244	23	34	0	273	50	0	96	108	83	68	123	71	9	0	35	1	0	0	0	0	59	149	153	133	5	61	3	90	52	0	87	233	50	84	45	46
YER164W	128	114	25	18	105	1	104	39	65	7	40	27	208	20	23	0	115	75	0	81	109	240	92	81	115	17	0	26	0	0	0	0	0	25	117	275	213	2	44	7	34	138	0	46	101	17	79	67	128
YER165W	357	335	44	20	186	0	576	226	58	22	93	82	832	31	97	1	247	379	0	491	186	797	121	213	133	33	0	106	1	0	1	0	0	40	123	621	371	1	43	24	127	437	2	96	129	16	160	144	377
YER166W	146	135	49	29	197	0	175	38	236	4	79	41	512	20	34	0	220	106	0	105	139	206	153	257	184	30	0	38	2	0	0	0	0	58	226	297	252	2	83	5	151	162	0	82	250	61	153	110	137
YER167W	84	61	24	15	46	0	65	16	75	7	41	17	122	1	8	1	36	16	0	35	18	96	26	49	79	8	0	14	1	0	0	0	0	41	136	111	84	1	31	10	14	93	0	12	101	11	31	35	91
YER168C	79	47	26	13	97	0	63	48	74	2	17	33	117	2	18	0	94	70	0	77	43	63	41	130	67	19	0	24	1	0	0	0	0	17	106	156	149	3	99	4	10	52	0	88	135	17	53	29	68
YER169W	148	100	24	24	60	2	53	32	128	3	26	13	140	26	17	0	72	49	0	81	48	190	90	57	108	24	0	12	0	0	0	0	0	33	108	79	65	4	38	6	54	117	0	25	140	9	119	75	113
YER170W	6	7	8	1	77	0	17	8	24	0	9	6	38	0	5	0	39	1	0	26	27	4	14	19	17	7	0	3	0	0	0	0	0	5	12	11	17	0	0	0	1	20	0	0	21	9	19	14	4
YER171W	41	57	21	6	78	0	91	46	115	0	12	38	192	4	13	0	70	43	0	45	52	105	70	128	76	14	0	23	3	0	0	0	0	24	83	122	98	2	35	9	36	95	0	48	107	13	89	48	58
YER172C	103	82	12	15	57	0	113	31	100	7	34	25	361	16	16	0	61	78	0	83	145	134	117	106	139	17	0	30	1	0	0	0	0	27	40	204	204	1	61	6	34	109	0	58	114	25	111	36	106
YER173W	27	46	15	21	29	0	23	5	80	4	18	18	84	1	12	0	58	20	0	36	34	84	36	22	56	8	0	8	0	0	0	0	0	24	73	49	51	1	5	7	10	47	0	26	93	23	66	14	37
YER174C	173	186	54	35	321	6	148	25	176	12	83	48	207	22	36	0	170	99	0	70	73	184	82	231	131	40	0	32	0	0	0	0	0	68	223	142	98	1	99	8	105	231	0	73	190	39	211	63	142
YER175C	173	148	104	50	190	0	13	6	231	0	70	65	61	42	85	0	145	6	0	26	138	231	70	232	140	23	0	34	3	0	0	0	0	77	218	30	15	4	67	1	49	130	0	212	239	28	84	46	123
YER176W	84	56	57	30	158	3	124	49	423	11	28	34	310	17	30	0	119	117	0	82	40	101	64	193	76	23	0	34	0	0	0	0	0	45	302	270	193	5	81	9	41	98	0	95	359	46	115	39	76
YER177W	2725	2055	1322	673	4561	36	2546	575	4086	125	1027	1144	6939	624	518	5	4134	1973	0	1697	2145	3537	2377	4094	2578	789	2	645	32	1	9	1	5	1462	3568	4745	3596	60	1810	145	2337	2711	1	1517	3906	1145	2820	1206	2258
YER178W	531	415	139	64	694	3	459	107	136	50	236	162	878	75	111	0	468	267	0	426	433	748	301	410	475	84	0	87	3	0	1	0	0	159	410	538	422	17	173	39	249	534	0	257	304	95	507	278	533
YER179W	0	4	2	0	15	1	7	2	19	0	0	1	1	0	0	0	9	5	0	2	0	0	0	0	0	0	0	4	0	0	0	0	0	4	20	13	10	0	0	0	0	0	0	0	17	0	0	2	10
YER180C	18	17	7	3	43	0	30	5	33	0	19	3	46	4	2	0	36	15	0	44	32	39	34	19	23	8	0	2	0	0	0	0	0	11	48	29	45	0	18	2	2	29	0	0	57	10	21	20	24
YER181C
YER182W	25	22	35	8	103	0	30	19	26	2	17	33	108	14	13	0	63	29	0	19	55	45	54	64	50	10	0	16	0	0	0	0	0	33	60	55	74	3	29	3	7	50	0	35	67	32	87	52	48
YER183C	88	43	38	13	66	0	85	19	117	0	24	28	181	7	20	0	157	55	0	79	74	128	44	92	66	21	0	22	0	0	0	0	0	18	145	145	62	2	51	7	57	95	0	65	65	44	92	25	74
YER184C	0	1	3	4	28	0	0	1	27	0	3	3	2	0	0	0	17	0	0	0	2	0	0	18	4	0	0	2	0	0	0	0	0	0	11	6	2	0	1	0	7	2	0	0	0	4	0	1	6
YER185W	10	5	3	0	0	0	1	2	20	0	0	6	7	0	0	0	1	1	0	9	0	9	1	0	8	0	0	0	0	0	0	0	0	0	25	0	10	0	13	0	0	9	0	7	35	3	0	0	9
YER186C	68	25	26	6	85	4	34	15	62	0	12	21	75	1	4	0	42	33	0	30	27	40	41	57	18	9	0	12	0	0	0	0	0	19	85	85	57	0	40	4	58	20	0	11	64	12	93	19	25
YER187W	11	5	6	1	26	0	8	5	13	1	0	0	20	0	2	0	6	7	0	1	0	24	8	8	10	0	0	4	0	0	0	0	0	2	33	23	16	0	0	0	0	19	0	10	9	1	10	0	5
YER188W
YER189W
YER190W
YFL001W	38	23	10	6	57	1	71	31	40	2	4	22	144	4	20	0	42	36	0	33	26	92	39	46	29	9	0	25	4	0	0	0	0	5	23	122	108	4	14	4	50	40	0	32	33	12	58	5	42
YFL002C	71	64	14	0	42	0	66	39	37	0	20	21	128	5	17	0	40	85	0	30	31	125	36	91	48	6	0	16	1	0	0	0	0	10	64	119	90	1	27	0	33	81	0	26	67	12	48	30	66
YFL003C	6	2	1	0	0	0	8	8	8	0	3	2	13	1	3	0	4	0	0	7	0	13	4	5	5	0	0	5	0	0	0	0	0	4	0	11	5	0	0	0	14	10	0	0	1	1	0	3	6
YFL004W	304	192	69	39	215	5	248	39	253	27	135	70	560	39	68	0	266	184	1	134	230	416	228	421	290	64	0	34	2	0	0	0	0	46	265	829	377	3	170	15	138	302	0	163	194	56	216	143	324
YFL005W	170	189	70	25	267	3	175	69	120	12	76	86	379	47	56	0	183	152	0	199	196	240	169	162	260	45	0	44	1	0	1	0	0	73	131	248	202	5	59	15	17	254	0	110	145	33	246	111	176
YFL007W	107	119	32	15	207	0	204	49	216	10	99	57	578	35	16	0	250	136	0	101	120	214	131	237	195	34	0	44	1	0	0	0	0	40	302	372	345	4	65	4	122	133	0	86	257	58	167	91	145
YFL008W	77	80	42	28	189	3	162	23	83	6	51	51	226	15	15	0	164	80	0	65	45	152	99	107	96	39	0	40	1	0	0	0	0	74	131	214	203	4	81	1	52	145	0	48	159	48	150	38	91
YFL009W	83	64	33	35	169	0	75	28	68	6	40	27	229	10	20	0	128	51	0	55	58	117	87	92	87	38	0	23	0	0	0	0	0	49	135	166	124	2	70	3	85	77	0	50	135	31	100	52	92
YFL010C	484	372	133	57	548	11	333	100	266	9	214	202	837	61	140	0	435	223	0	321	404	697	325	601	526	127	0	92	1	0	0	0	0	136	434	583	454	9	243	24	179	441	0	264	422	103	278	285	432
YFL011W	0	1	0	0	0	0	0	0	4	0	0	1	0	0	0	0	0	0	0	0	0	1	0	0	0	0	0	1	0	0	0	0	0	0	6	0	0	0	0	0	0	0	0	0	2	0	0	1	0
YFL012W	2	0	0	0	0	0	0	0	0	0	0	0	0	0	0	0	0	0	0	0	0	0	0	0	0	0	0	0	0	0	0	0	0	0	0	0	0	0	0	0	0	0	0	0	1	0	0	0	4
YFL013C	86	56	12	4	46	0	26	5	52	4	13	22	59	4	10	0	89	30	0	7	56	107	64	56	48	6	0	7	2	0	0	0	0	8	60	45	29	0	38	3	66	115	0	5	95	1	68	47	39
YFL014W	2659	2510	283	145	1036	32	82	11	3651	9	444	690	10	337	36	0	8852	27	0	116	886	3825	2658	3820	3513	237	0	37	41	0	0	0	0	314	2537	84	12	42	1164	19	4861	2575	0	33	2850	96	2324	899	773
YFL015C
YFL016C	100	68	39	12	130	1	85	46	83	8	42	33	184	4	23	4	61	67	0	87	67	151	48	66	97	34	4	45	2	4	4	3	2	34	39	108	111	3	133	13	41	94	8	47	55	14	96	75	97
YFL017C	109	96	47	15	79	2	107	19	121	0	29	41	205	4	18	0	144	81	0	83	50	160	58	113	77	9	0	12	0	0	0	0	0	49	78	154	114	2	32	4	78	94	0	74	92	25	50	58	108
YFL018C	440	355	163	127	562	3	375	82	426	32	194	166	1243	78	159	1	440	307	0	289	303	647	313	604	527	127	0	156	1	0	0	0	1	161	476	1004	612	11	267	35	231	449	1	363	472	133	567	275	424
YFL019C
YFL020C	0	7	0	0	11	0	0	3	33	0	0	1	0	0	0	0	11	0	0	0	1	1	4	21	2	0	0	0	0	0	0	0	0	0	1	1	0	0	2	1	0	4	0	0	36	0	0	0	0
YFL021W	679	532	81	125	383	4	122	9	405	4	374	103	129	72	27	0	389	38	0	58	438	882	628	297	1156	110	0	9	11	0	0	0	0	117	466	156	101	3	76	9	144	724	0	69	596	104	313	186	584
YFL022C	265	346	32	30	274	4	688	145	341	53	98	61	1796	45	57	0	160	454	0	339	286	498	222	518	351	54	0	189	3	0	0	1	0	70	245	1475	976	28	205	62	78	324	1	169	448	43	266	115	186
YFL023W	105	65	2	5	10	0	126	41	73	15	7	11	231	9	16	0	11	58	0	54	65	78	64	74	40	9	0	28	0	0	0	0	0	3	76	244	195	3	46	5	1	83	0	42	89	2	12	30	77
YFL024C	44	31	13	7	40	0	21	33	23	0	32	2	63	5	13	0	9	21	0	60	84	85	38	25	31	7	0	7	0	0	0	0	0	8	13	32	35	3	12	5	38	62	0	8	26	7	36	16	50
YFL025C	33	50	4	5	46	0	39	6	21	2	7	1	80	2	6	0	31	17	0	17	56	31	8	29	23	10	0	2	0	0	0	0	0	5	46	45	21	0	10	3	11	36	0	21	7	7	1	12	46
YFL026W	9	12	5	0	17	0	23	1	10	0	2	0	11	1	1	0	15	0	0	13	0	11	5	2	18	2	0	0	0	0	0	0	0	7	0	17	8	0	1	0	22	11	0	1	12	0	0	6	17
YFL027C	41	25	11	8	47	0	12	8	57	2	19	15	58	1	3	0	49	13	0	44	41	44	33	38	30	20	0	3	7	0	0	0	0	20	65	42	18	0	21	1	38	40	0	15	69	19	72	16	35
YFL028C	163	124	72	53	237	5	136	19	347	7	102	52	250	37	47	0	182	76	0	175	193	208	146	422	160	49	0	44	0	0	0	0	0	54	365	226	249	1	95	10	103	149	0	108	495	45	150	75	138
YFL029C	34	30	18	20	89	1	61	6	140	2	14	12	78	9	7	0	35	34	0	22	45	34	25	76	42	12	0	21	1	0	1	0	0	30	109	83	67	5	39	4	55	49	0	17	97	7	22	10	18
YFL030W	71	78	40	23	90	0	15	1	76	5	58	26	28	4	3	0	77	17	0	22	52	90	69	26	91	38	0	13	2	0	0	0	0	15	57	11	28	0	15	3	93	60	0	11	71	19	59	102	41
YFL031W	8	21	12	8	33	0	14	12	52	1	13	10	67	1	17	0	44	28	0	69	49	16	16	35	33	4	0	1	1	0	0	0	0	10	42	51	53	0	36	0	22	23	0	9	34	6	47	14	5
YFL032W
YFL033C	120	94	26	14	135	2	75	14	110	2	52	35	56	7	6	0	70	43	0	14	78	175	109	63	133	18	0	13	2	0	0	0	0	29	99	108	93	0	27	6	37	131	0	28	91	19	123	85	137
YFL034W	70	58	31	7	44	0	52	4	49	0	25	14	113	10	3	0	50	39	0	18	40	66	51	59	50	17	0	19	0	0	0	0	0	22	52	77	82	0	15	5	0	63	0	25	44	16	30	40	66
YFL036W	91	63	21	7	44	2	73	21	14	2	25	23	127	4	7	0	63	39	0	74	48	111	41	82	83	5	0	15	2	0	0	0	0	36	30	73	61	0	9	5	68	111	0	18	43	19	38	53	78
YFL037W	578	452	152	48	617	2	852	178	300	66	259	125	1469	98	135	0	367	596	0	426	373	628	328	512	438	139	4	161	3	0	1	0	0	208	296	1168	751	3	251	79	117	642	4	286	283	172	565	289	444
YFL038C	523	539	277	97	829	14	655	162	623	26	293	291	1328	91	155	0	853	378	0	619	662	731	480	717	675	152	0	123	10	0	0	0	0	247	654	1054	698	15	366	30	348	511	0	309	658	219	542	354	607
YFL039C	1745	1390	469	264	1670	13	2374	647	805	131	797	522	4536	275	501	2	1348	1541	3	1457	1599	2682	1128	1690	1637	386	4	613	34	0	0	1	1	619	1145	3374	2645	40	648	130	653	1859	0	1312	1132	437	1975	938	1749
YFL040W	14	3	0	4	19	0	8	3	1	0	2	4	18	0	4	0	14	2	0	0	20	12	7	8	14	0	0	0	0	0	0	0	0	12	1	0	6	0	20	0	18	27	0	0	0	8	1	8	12
YFL041W	58	49	30	8	90	0	47	27	55	12	33	23	62	3	19	0	97	18	0	43	52	114	22	42	37	15	0	11	0	0	0	0	0	14	44	35	38	2	8	4	16	61	0	25	38	23	79	22	65
YFL042C	53	47	36	32	102	0	39	14	191	1	37	32	93	3	5	0	84	30	0	35	44	78	40	37	92	22	0	5	2	0	0	0	0	20	194	87	37	5	53	2	166	71	0	53	234	29	58	19	69
YFL044C	11	14	14	3	23	0	24	4	44	0	7	11	33	0	3	0	54	9	0	21	25	33	17	11	19	7	0	5	0	0	0	0	0	16	21	29	24	0	10	6	19	8	0	2	22	7	0	15	11
YFL045C	534	473	116	59	592	0	1021	337	300	30	260	171	2172	68	178	0	406	752	1	575	736	704	318	668	509	175	0	272	2	0	0	0	0	158	335	1618	1289	12	230	35	151	519	0	448	334	132	597	338	476
YFL046W	77	118	45	36	150	0	91	26	186	15	92	48	193	9	37	0	112	98	0	102	96	81	120	170	98	35	0	23	0	0	0	0	0	59	173	171	114	2	91	2	75	113	0	86	162	65	116	79	87
YFL047W	32	24	15	8	64	0	17	9	63	0	5	13	73	1	7	0	56	25	0	42	25	28	22	26	46	4	0	7	0	0	0	0	0	7	81	80	60	1	5	6	23	19	0	18	52	0	51	9	16
YFL048C	115	98	79	48	241	6	216	49	104	0	88	53	497	20	49	0	152	181	0	133	142	217	107	134	199	33	0	42	2	0	0	0	0	54	183	407	318	6	141	7	55	117	0	87	181	42	146	114	103
YFL049W	92	105	32	27	108	1	78	28	93	9	44	38	139	18	12	0	101	48	0	64	100	134	67	92	77	39	0	9	0	0	0	0	0	36	124	123	122	7	43	2	37	103	0	44	112	51	90	40	73
YFL050C	3	0	9	4	50	0	10	2	33	0	0	12	26	0	0	0	15	12	0	7	0	7	9	3	1	0	0	0	0	0	0	0	0	3	26	36	16	0	24	0	9	18	0	0	24	20	13	1	9
YFL051C	0	0	0	0	1	0	0	8	0	0	0	0	10	0	1	0	5	0	0	0	0	0	0	1	0	0	0	3	0	0	0	0	0	1	0	0	0	0	0	0	0	0	0	14	0	0	0	0	0
YFL052W	0	0	3	0	0	0	0	0	8	0	0	0	0	0	0	0	1	0	0	0	0	0	0	0	0	0	0	0	0	0	0	0	0	0	0	4	0	0	0	0	0	0	0	0	0	0	0	0	0
YFL053W	1	4	0	0	0	0	1	0	12	0	1	3	0	0	1	0	6	0	0	0	0	7	1	17	1	0	0	0	0	0	0	0	0	0	11	0	0	0	0	0	3	3	0	0	1	0	22	2	16
YFL054C	21	29	47	8	60	0	15	8	69	0	12	15	74	3	2	0	66	11	0	25	24	21	31	45	32	7	0	2	4	0	0	0	0	14	67	25	28	0	31	5	51	29	0	6	49	3	15	39	28
YFL055W	15	14	42	11	212	0	1	2	230	0	3	55	0	0	1	0	79	0	0	4	0	13	2	65	17	0	0	0	2	0	0	0	0	26	156	1	0	4	7	0	6	3	0	0	72	33	0	5	16
YFL056C
YFL057C	8	18	45	7	99	0	13	12	174	0	7	37	10	0	4	0	68	1	0	20	0	46	2	35	3	3	0	2	0	0	0	0	0	11	73	13	4	0	15	0	42	13	0	4	62	14	11	2	10
YFL058W
YFL059W
YFL060C
YFL061W
YFL062W
YFL063W
YFL064C
YFL065C
YFL066C
YFL067W
YFL068W
YFR001W	121	107	22	10	21	0	231	139	92	11	21	41	437	8	40	0	92	183	0	205	95	186	74	113	53	24	0	39	1	0	0	0	0	14	75	269	202	2	52	9	18	118	0	66	105	14	40	34	77
YFR002W	92	47	17	4	121	2	101	33	52	1	31	32	193	11	14	0	39	53	0	82	152	144	54	65	75	6	0	23	1	0	0	0	0	55	47	108	195	0	12	5	13	109	0	18	143	36	95	49	89
YFR003C	81	98	109	37	249	2	143	33	185	13	72	81	151	15	33	0	164	34	0	81	156	105	55	62	123	27	0	12	0	0	0	0	0	58	212	190	96	10	51	13	75	121	0	48	158	73	66	56	70
YFR004W	176	104	79	50	341	1	277	97	167	13	73	76	459	26	34	0	211	137	0	254	194	242	109	230	179	31	0	54	2	0	0	0	0	52	234	410	337	5	119	13	182	140	0	71	252	84	103	96	122
YFR005C	57	46	13	0	65	0	113	21	73	0	10	13	200	4	2	0	46	33	0	31	46	89	30	56	44	10	0	20	0	0	0	0	0	8	48	81	60	1	33	13	21	61	0	14	52	17	34	14	49
YFR006W	46	80	11	6	28	0	36	14	65	6	22	13	144	9	18	0	96	33	0	72	42	117	34	62	71	14	0	13	1	0	0	0	0	12	49	68	82	3	38	0	34	81	0	23	35	14	41	34	68
YFR007W	14	11	16	5	62	0	22	8	96	0	16	10	50	5	5	0	24	10	0	39	13	13	16	20	29	8	0	11	0	0	0	0	0	6	46	37	25	0	22	0	8	20	0	14	47	10	36	5	22
YFR008W	5	4	2	1	18	0	7	0	24	0	4	0	9	0	0	0	27	1	0	0	16	6	0	3	2	0	0	6	0	0	0	0	0	4	29	7	8	1	0	0	0	3	0	0	19	5	1	7	7
YFR009W	114	61	24	24	149	1	173	63	103	8	17	36	499	10	31	0	160	130	0	156	45	121	77	146	102	23	0	22	2	0	0	0	0	46	127	390	239	3	96	9	79	73	0	72	170	19	58	60	98
YFR010W	86	80	30	22	117	1	115	25	135	13	25	35	191	10	27	4	204	52	0	138	52	87	81	88	62	30	0	18	3	0	1	1	1	47	48	114	109	4	65	1	26	77	0	57	167	23	50	21	110
YFR011C	71	38	32	22	138	0	95	21	16	0	33	40	75	15	15	0	36	34	1	48	48	55	40	86	86	30	1	9	1	0	0	0	0	28	61	82	48	0	51	2	64	46	0	49	39	14	82	52	54
YFR012W
YFR013W	86	35	21	12	109	1	72	21	87	2	18	16	174	13	16	0	48	49	0	54	40	47	32	44	50	10	0	33	0	0	0	0	0	23	64	215	87	0	26	8	35	40	0	52	112	36	71	39	43
YFR014C	64	23	51	13	114	0	22	11	23	0	12	29	84	5	13	0	66	6	0	45	57	30	34	13	36	6	0	3	0	0	0	0	0	57	76	43	16	0	21	3	34	20	0	5	31	30	47	27	23
YFR015C	29	46	115	2	114	2	4	1	128	0	28	14	42	14	4	0	206	11	0	8	10	40	37	34	63	6	0	5	0	0	0	0	0	26	149	11	22	2	9	1	114	34	0	13	172	18	9	27	24
YFR016C	52	56	41	20	124	3	91	16	125	3	21	28	188	11	12	0	119	46	0	89	56	73	51	124	75	21	0	28	0	0	0	0	0	21	108	203	205	2	28	0	103	75	0	52	103	35	22	19	72
YFR017C	41	40	62	5	121	0	10	1	80	3	24	14	17	7	1	0	179	5	0	9	13	60	63	35	92	12	0	9	1	0	0	0	0	27	65	16	10	2	51	3	52	43	0	26	65	12	57	68	19
YFR018C	59	63	30	23	139	0	133	33	150	6	38	44	371	26	9	0	135	114	0	160	69	83	53	130	91	19	0	60	5	0	0	0	0	37	227	246	183	3	82	8	95	66	0	71	187	42	84	38	74
YFR019W	66	28	13	9	34	0	29	11	40	0	18	11	86	7	9	0	80	20	0	81	26	62	52	30	39	7	0	7	0	0	0	0	0	14	29	31	55	1	3	0	22	78	0	47	32	5	94	31	57
YFR020W	27	24	24	13	70	0	11	4	55	0	4	16	30	2	4	0	61	15	0	30	11	26	10	30	14	11	0	1	0	0	0	0	0	32	52	41	37	0	11	0	63	14	0	20	150	13	0	6	5
YFR021W	48	34	23	20	106	4	70	21	75	3	24	23	114	9	8	0	98	23	0	63	63	72	45	76	40	7	0	9	0	0	0	0	0	13	97	153	115	2	41	9	76	44	0	24	122	23	38	21	53
YFR022W	27	35	14	7	54	0	7	5	36	0	19	8	3	3	6	0	50	11	0	30	14	8	16	15	33	5	0	2	0	0	0	0	0	13	72	81	12	0	29	1	22	31	0	5	22	11	29	3	28
YFR023W	0	5	1	0	6	0	5	0	0	0	1	4	0	1	0	0	11	0	0	18	0	3	1	15	0	0	0	0	0	0	0	0	0	0	0	0	0	0	0	0	0	3	0	0	5	0	5	0	0
YFR025C	173	109	42	35	177	3	116	9	174	0	116	48	157	28	47	0	141	47	0	75	134	193	117	231	188	31	0	17	1	0	0	0	0	32	173	188	93	6	98	2	66	143	0	105	176	8	133	120	202
YFR026C	9	1	16	14	2	0	3	3	23	0	6	9	22	0	0	0	62	6	0	5	28	3	3	25	8	0	0	1	0	0	0	0	0	10	42	19	7	0	14	1	11	9	0	0	70	4	7	1	9
YFR027W	9	9	7	6	33	0	15	1	15	0	7	7	51	1	5	0	9	11	0	0	23	11	3	25	11	2	0	7	0	0	0	0	0	3	38	23	11	0	6	3	12	20	0	2	21	4	4	8	10
YFR028C	25	39	6	7	65	0	50	13	52	5	13	21	125	4	16	0	25	46	0	27	32	54	30	23	36	13	0	20	0	0	0	0	0	11	18	125	114	3	27	8	1	61	0	43	36	15	53	24	52
YFR029W	81	50	11	6	64	1	42	13	66	1	28	11	52	6	6	0	48	29	0	41	32	86	67	49	54	5	0	11	0	0	0	0	0	16	48	57	48	2	40	4	12	73	0	26	43	10	22	29	46
YFR030W	577	510	1499	775	4484	14	77	34	1156	6	250	1445	46	71	230	0	2749	16	0	41	557	762	265	1898	415	118	0	33	5	0	0	0	0	1470	3519	76	72	49	740	20	1700	560	0	403	3859	1068	263	280	545
YFR031C	91	68	41	23	116	0	44	11	57	3	40	52	175	26	16	0	67	49	0	71	42	128	51	63	57	21	0	17	1	0	0	0	0	28	113	139	127	2	22	5	84	136	0	17	188	22	43	28	91
YFR032C	0	1	0	0	0	0	0	2	18	0	0	0	1	0	1	0	0	0	0	1	0	0	0	0	1	0	0	0	0	0	0	0	0	1	0	8	0	0	1	0	2	0	0	0	0	1	0	0	2
YFR033C	495	483	595	153	1069	1	302	216	556	24	485	372	737	70	211	0	398	256	0	274	393	721	255	386	597	215	0	175	4	0	0	0	0	347	507	744	476	8	149	39	199	550	0	487	525	247	772	338	551
YFR034C	52	39	55	23	49	0	36	19	149	3	12	28	41	9	23	0	55	24	0	32	19	130	25	45	17	12	0	3	0	0	0	0	0	29	57	16	29	0	21	3	0	82	0	26	31	16	49	43	75
YFR035C
YFR036W	51	48	10	13	26	0	56	23	16	0	18	10	145	3	12	0	75	29	0	21	23	61	35	43	37	13	0	12	0	0	0	0	0	12	65	118	82	1	20	7	28	48	1	9	22	13	51	21	43
YFR037C	108	83	51	34	253	6	232	49	372	9	64	68	678	29	29	0	222	133	0	128	117	143	125	263	117	58	0	59	0	0	0	1	0	59	223	514	377	2	120	15	193	141	0	98	316	59	189	89	147
YFR038W	44	49	5	7	43	0	109	14	111	2	22	4	163	16	14	0	75	73	0	39	46	95	62	95	58	20	0	14	6	0	0	0	0	10	107	136	164	2	64	7	54	65	0	15	161	22	53	19	40
YFR039C	84	87	38	29	114	1	89	27	121	1	43	33	150	24	20	0	84	87	0	118	51	170	63	65	73	27	0	24	2	0	0	0	0	41	152	158	75	0	58	1	87	80	0	58	140	38	71	30	84
YFR040W	224	136	21	8	122	3	139	32	58	8	73	23	236	6	16	0	173	90	0	21	139	277	104	150	191	22	0	27	1	0	0	0	0	30	79	398	191	4	71	12	63	207	0	59	43	22	117	48	149
YFR041C	66	63	49	33	99	2	88	16	54	0	13	39	155	3	9	0	91	72	0	17	91	67	57	76	73	14	0	24	0	0	0	0	0	24	95	111	95	5	21	4	58	64	0	17	81	17	118	35	69
YFR042W	69	62	55	21	186	0	79	29	198	6	29	66	159	9	16	0	118	51	0	77	102	99	39	168	64	35	0	37	0	0	0	0	0	48	203	148	137	3	34	4	33	63	0	40	153	33	63	45	46
YFR043C	32	38	24	23	74	1	41	21	114	1	14	28	109	5	6	0	99	31	0	25	51	34	20	89	47	8	0	18	4	0	0	0	0	13	67	59	65	0	34	5	48	46	0	11	125	8	63	47	34
YFR044C	362	312	91	64	633	7	620	99	526	25	179	186	1455	131	102	0	635	302	0	351	406	600	358	684	464	99	0	170	3	0	0	0	0	125	557	1011	681	5	436	41	270	455	1	330	575	95	251	246	345
YFR045W	20	11	10	0	26	0	38	2	36	0	11	9	35	0	2	0	35	6	0	10	26	24	15	28	12	3	0	10	0	0	0	0	0	12	58	48	12	0	37	0	18	21	0	0	64	6	21	5	32
YFR046C	36	14	12	11	22	0	20	3	53	0	6	10	23	1	1	0	41	6	0	12	15	39	28	94	35	7	0	4	0	0	0	0	0	6	38	28	17	0	25	0	26	24	0	22	76	2	48	3	32
YFR047C	97	123	47	21	154	3	68	31	276	0	34	57	244	28	30	0	199	54	0	61	115	161	122	151	128	38	0	16	1	0	0	0	0	36	140	148	56	2	50	15	52	93	0	93	186	27	111	76	169
YFR048W	30	23	12	2	25	0	21	19	47	1	13	8	61	7	2	0	5	22	0	18	47	48	26	36	32	6	0	15	0	0	0	0	0	3	44	58	30	1	0	1	50	32	0	11	23	10	25	7	35
YFR049W	165	114	133	55	313	2	109	21	113	7	130	123	196	11	43	0	242	45	0	67	181	268	114	127	202	45	0	22	0	0	0	1	0	84	110	85	93	3	29	11	63	177	0	84	107	81	155	139	102
YFR050C	160	159	127	60	424	3	266	99	238	4	84	178	707	20	55	0	463	189	0	276	156	235	166	393	183	43	0	74	10	0	0	0	0	120	167	412	298	9	134	9	148	151	0	95	284	81	157	121	154
YFR051C	316	199	94	32	354	1	456	105	308	45	109	94	1022	35	72	0	304	311	0	281	248	348	186	433	231	59	0	101	0	0	0	1	0	145	248	828	513	7	127	47	141	277	1	186	382	97	274	131	240
YFR052W	167	151	99	24	475	0	262	76	221	15	63	86	541	19	40	0	243	177	0	185	170	199	122	179	177	37	0	80	0	0	0	0	0	97	334	350	293	7	122	14	126	118	0	89	296	60	89	79	175
YFR053C	273	245	511	29	276	5	89	5	123	9	173	76	409	60	14	0	251	26	0	50	316	309	171	139	342	88	0	16	0	0	0	0	0	98	120	157	137	24	224	10	357	249	0	77	113	93	154	142	62
YFR054C
YFR055W	8	11	2	0	0	0	10	13	4	0	7	2	34	0	1	0	1	15	0	0	23	14	3	5	11	1	0	4	0	0	0	0	0	0	1	19	19	1	2	0	0	12	0	0	1	0	6	13	13
YFR056C
YFR057W	0	0	5	0	0	0	0	0	0	0	3	1	0	0	2	0	0	0	0	0	0	0	0	0	0	0	0	4	0	0	0	0	0	0	0	0	0	0	0	0	0	0	0	0	6	0	0	0	0
YGL001C	118	158	121	38	392	3	158	93	305	8	91	123	406	31	69	0	195	70	0	149	182	182	115	274	186	55	0	76	8	0	0	0	0	135	282	331	185	7	119	13	92	185	1	109	262	109	124	116	135
YGL002W	56	100	87	37	240	0	113	41	314	7	41	74	280	11	18	0	148	40	0	134	114	110	80	101	119	28	0	24	0	0	0	0	0	58	173	163	124	1	64	0	90	98	0	13	198	33	95	59	98
YGL003C	43	53	22	7	45	0	24	3	140	2	16	17	74	6	8	0	83	27	0	36	50	68	50	48	38	14	0	10	0	0	0	0	0	16	52	46	49	0	28	0	34	45	0	12	108	13	18	28	35
YGL004C	16	8	13	19	2	0	16	10	55	2	3	4	31	2	6	0	50	12	0	10	29	24	32	49	9	6	0	7	1	0	0	0	0	8	35	37	17	1	3	0	11	38	0	2	35	6	15	4	16
YGL005C	124	72	18	13	87	1	43	18	34	0	33	22	72	10	13	0	41	24	0	43	64	104	53	62	93	12	0	13	0	0	0	0	0	19	59	66	64	7	17	0	31	70	0	25	101	19	68	27	87
YGL006W	287	251	86	73	337	4	90	35	220	8	218	82	290	22	20	0	178	61	0	48	376	303	265	192	311	60	0	22	0	0	0	0	0	114	293	126	144	2	102	5	178	273	0	83	295	59	303	224	199
YGL007W
YGL008C	134	124	23	9	169	0	127	35	40	3	48	28	561	15	50	0	167	88	0	234	181	193	72	85	93	21	0	39	0	0	0	0	0	36	73	428	326	1	12	1	2	146	1	158	61	35	195	41	147
YGL009C	2803	1804	33	20	176	15	860	26	188	48	141	32	2266	98	35	0	280	755	0	1368	375	2307	3097	287	2388	111	0	93	21	0	0	0	0	27	351	1875	2093	7	136	57	76	3413	0	126	278	27	345	248	3009
YGL010W	68	60	85	12	144	0	58	11	164	1	35	33	68	1	3	0	102	19	0	25	36	98	93	32	107	13	0	17	1	0	0	0	0	46	127	29	51	2	28	5	25	85	0	18	173	26	56	42	71
YGL011C	255	268	169	133	611	6	362	169	433	13	114	162	1221	64	82	0	532	303	0	328	274	423	122	502	294	73	0	126	1	0	0	6	0	205	615	716	581	8	197	20	206	333	2	247	478	175	97	153	272
YGL012W	248	205	100	49	646	4	399	187	310	23	84	124	1237	42	80	0	381	255	0	316	283	377	151	417	204	44	0	200	0	0	0	0	0	167	360	724	571	12	152	34	169	268	1	322	470	128	242	137	173
YGL013C	99	40	19	11	106	0	32	23	104	2	19	26	113	17	19	0	61	44	0	11	78	94	48	74	59	11	2	17	0	0	0	0	0	28	76	93	98	2	8	4	32	83	0	11	68	27	9	9	46
YGL014W	73	86	14	6	53	1	134	32	46	0	22	23	162	6	21	0	52	53	0	67	27	147	28	81	40	1	0	14	0	0	0	2	0	29	21	105	102	4	15	1	47	112	0	36	27	8	53	11	76
YGL015C	4	2	2	0	2	0	2	3	1	0	0	0	6	0	1	0	3	6	0	0	1	6	0	4	5	0	0	0	0	0	0	0	0	5	2	0	2	1	0	0	0	0	0	0	2	0	0	0	1
YGL016W	53	41	6	4	27	0	105	25	19	0	10	18	203	10	5	0	18	85	0	66	73	99	20	54	13	7	0	18	5	0	0	0	0	5	39	138	91	3	4	0	34	46	0	11	35	5	34	19	56
YGL017W	24	39	10	12	48	0	60	13	49	0	10	9	63	2	9	0	47	21	0	15	28	28	24	27	41	0	0	13	0	0	0	0	0	16	85	80	102	0	15	3	98	25	0	17	90	2	44	13	26
YGL018C	50	24	22	6	50	0	39	17	69	1	5	12	96	6	12	0	110	28	0	33	17	25	14	36	23	11	0	16	0	0	0	0	0	31	40	71	95	0	35	0	29	33	0	19	80	7	21	30	20
YGL019W	163	133	64	26	335	1	236	53	161	1	56	69	662	44	48	0	225	107	0	120	155	251	135	177	148	35	0	58	2	0	0	0	0	62	228	443	170	4	136	4	97	130	0	72	233	48	195	103	155
YGL020C	193	143	45	25	149	10	291	58	187	30	45	74	607	39	50	0	237	217	0	185	219	263	139	221	116	52	0	30	1	0	0	0	0	90	205	437	309	9	118	22	47	158	0	125	145	47	146	118	152
YGL021W	124	129	22	23	173	0	53	14	92	2	55	54	104	10	36	0	137	24	0	53	172	113	79	70	114	24	0	7	0	0	0	0	0	46	73	108	106	0	38	13	63	176	0	72	78	34	148	67	123
YGL022W	376	232	135	72	540	2	665	192	377	25	127	181	1565	55	120	0	406	454	0	388	293	517	274	541	293	92	0	145	2	0	0	0	0	120	465	1114	866	10	162	39	212	393	0	411	475	127	446	240	323
YGL023C	83	117	41	18	113	2	109	35	117	5	36	52	209	21	31	0	120	133	0	56	85	127	94	168	111	19	0	17	0	0	0	0	0	45	120	143	142	2	33	9	18	125	0	51	171	20	99	87	75
YGL024W
YGL025C	37	24	16	4	52	0	55	7	9	5	26	13	49	4	10	0	11	20	0	27	25	52	14	16	28	6	0	4	0	0	0	0	0	10	23	73	21	0	1	8	26	32	0	43	36	12	47	23	39
YGL026C	449	352	89	75	473	4	312	64	417	7	141	127	705	68	179	0	313	253	0	406	372	531	263	581	376	65	0	161	6	0	0	0	0	126	467	639	376	15	289	12	212	380	0	516	425	87	232	170	440
YGL027C	132	101	76	50	323	4	214	73	242	3	75	76	702	39	42	0	257	159	0	121	247	189	144	316	157	84	0	66	0	0	0	0	0	92	276	567	306	7	181	17	115	101	2	148	402	89	77	70	141
YGL028C	223	120	6	9	112	0	165	23	126	15	28	19	303	25	7	0	137	7	0	93	130	461	187	150	161	21	0	12	1	0	0	0	0	9	120	258	212	2	37	8	34	388	0	47	167	7	89	38	244
YGL029W	266	228	3	0	58	1	448	277	69	6	35	33	672	17	68	0	69	265	0	246	78	450	147	217	112	20	0	67	6	0	0	0	0	13	152	495	381	2	36	16	21	250	0	80	185	10	124	56	189
YGL030W	1810	1543	155	152	844	13	6739	1426	674	521	599	386	13642	157	866	1	590	5145	0	2745	1728	2634	1402	1364	1701	361	1	1181	22	0	0	1	13	255	994	8109	6693	43	746	545	180	2066	6	1835	806	257	1800	1244	1672
YGL031C	662	459	72	60	355	4	2191	726	242	102	261	143	4755	56	373	2	249	1917	0	1158	670	853	417	584	590	134	0	436	3	0	0	0	0	136	236	3042	2421	16	146	190	64	632	2	749	279	87	559	417	442
YGL032C	8	5	4	0	13	0	1	0	1	0	0	2	11	7	1	0	0	5	0	0	4	6	4	0	1	0	0	0	0	0	0	0	0	0	2	6	0	0	0	0	0	9	0	0	4	1	29	0	12
YGL033W	0	0	0	0	0	0	3	0	0	0	0	1	0	0	0	0	32	0	0	0	0	0	0	0	0	0	0	1	0	0	0	0	0	0	0	0	16	0	0	0	0	0	0	0	7	0	0	0	0
YGL034C
YGL035C	143	110	1	5	81	0	61	29	34	0	51	27	53	11	16	0	63	39	0	18	109	226	126	45	106	25	0	13	0	1	0	0	0	12	43	78	117	1	69	8	33	179	0	54	65	11	110	59	209
YGL036W	48	64	43	13	85	0	74	22	99	8	17	35	100	5	11	0	88	24	0	17	41	44	33	30	73	24	0	22	0	0	0	0	0	33	84	120	88	1	66	2	39	80	0	25	101	15	25	39	66
YGL037C	797	694	599	275	2075	7	362	71	1572	24	595	377	715	191	84	0	1495	220	0	198	884	893	621	879	1058	246	0	214	21	0	0	0	0	557	1188	792	584	29	1611	24	1197	654	0	274	1346	402	970	517	330
YGL038C	72	50	42	13	107	0	71	22	123	12	39	32	151	11	11	1	115	23	0	49	82	60	77	48	65	16	0	27	1	0	0	0	0	29	105	68	67	3	35	20	40	63	0	23	138	23	96	37	69
YGL039W	67	32	15	9	59	0	61	150	100	5	7	23	151	10	5	0	90	42	0	53	16	99	25	39	32	6	0	13	2	0	0	0	0	17	81	91	81	3	6	8	34	36	0	10	94	6	2	17	54
YGL040C	121	117	57	33	196	1	152	46	121	14	43	46	340	11	35	0	172	96	0	67	120	118	68	140	115	19	0	56	8	0	0	0	0	74	158	168	139	2	63	2	39	122	0	112	114	51	116	75	122
YGL041C
YGL042C
YGL043W	74	68	28	15	162	0	146	35	76	2	27	27	287	24	29	0	121	69	0	78	43	131	81	104	96	12	0	26	0	0	0	0	0	21	115	231	176	4	55	0	33	101	1	81	159	22	73	37	134
YGL044C	28	30	13	3	75	0	44	17	57	1	21	19	89	0	11	0	18	19	0	36	30	41	20	40	18	23	0	15	0	0	0	0	0	16	30	35	25	2	10	0	44	29	0	12	58	3	36	15	33
YGL045W	36	22	24	21	57	0	15	8	58	0	23	19	28	7	4	0	80	18	0	11	57	55	14	50	54	6	0	0	0	0	0	0	0	31	101	50	23	1	18	0	99	42	0	5	79	5	35	22	35
YGL047W	12	16	36	33	161	0	29	7	126	0	26	25	102	10	9	0	137	26	0	20	50	16	28	86	52	12	0	16	0	0	0	0	0	54	76	63	68	5	23	0	19	18	0	56	77	31	58	13	20
YGL048C	167	137	105	48	642	2	286	89	444	30	96	100	1012	28	48	0	359	220	0	167	128	212	174	360	232	77	0	127	1	0	0	0	0	178	371	633	517	4	243	15	228	167	1	189	404	122	174	120	148
YGL049C	70	38	30	18	84	8	93	33	39	18	11	18	150	4	19	0	64	59	0	76	42	87	45	83	51	5	0	32	0	0	0	1	0	50	49	139	136	3	34	11	55	101	0	55	102	13	27	37	59
YGL050W	19	4	7	10	33	0	18	10	40	2	7	7	36	1	5	0	47	8	0	22	18	20	9	4	5	3	0	0	2	0	0	0	0	2	34	27	12	0	15	0	24	22	0	6	14	2	28	18	20
YGL051W	1	0	3	3	2	0	0	0	23	0	0	0	1	0	2	0	1	0	0	2	12	3	1	0	2	0	0	0	0	0	0	0	0	1	3	0	0	0	0	0	0	7	0	0	5	3	1	1	1
YGL052W
YGL053W	27	42	28	20	41	0	7	3	60	0	15	12	28	1	7	0	73	11	0	14	79	42	18	14	51	22	0	1	0	0	0	0	0	14	25	15	21	0	35	2	50	22	0	5	35	10	15	16	28
YGL054C	173	173	36	15	143	1	216	57	83	2	76	42	446	17	41	0	151	121	0	105	188	225	107	151	133	29	2	25	0	0	0	0	0	61	65	246	199	5	97	0	62	148	0	79	43	50	218	94	133
YGL055W	920	670	29	19	151	2	277	648	34	55	266	66	512	6	42	0	64	158	0	250	361	1898	249	47	458	228	0	101	2	1	0	0	5	27	91	392	231	3	64	61	30	1131	0	64	61	79	234	324	1131
YGL056C	46	49	16	3	6	1	37	28	16	1	15	7	53	1	8	0	76	18	0	55	5	100	13	69	16	4	0	5	0	0	0	0	0	3	33	21	9	0	29	5	2	56	0	24	5	11	1	6	100
YGL057C	25	13	10	5	7	0	15	10	24	0	4	7	13	0	6	0	2	15	0	18	6	36	4	26	14	8	0	3	1	0	0	0	0	5	15	20	20	0	10	2	32	37	0	13	23	3	0	22	15
YGL058W	79	67	17	8	115	0	99	26	53	1	19	33	225	10	19	0	88	80	0	97	38	70	67	79	46	7	0	27	0	0	0	1	0	15	28	184	64	2	38	6	55	97	0	27	97	28	89	34	51
YGL059W	117	86	35	34	138	3	16	4	147	6	35	22	51	17	36	0	64	15	0	33	80	138	106	207	122	13	0	14	0	0	0	0	0	24	223	55	41	3	63	0	73	87	0	90	211	23	116	47	97
YGL060W	50	19	17	22	53	0	38	15	46	8	8	7	72	1	9	0	58	14	0	57	21	31	23	54	19	3	0	20	0	0	0	0	0	11	105	82	30	1	14	6	34	16	0	5	77	29	73	15	26
YGL061C	39	57	19	13	37	1	34	8	32	4	15	18	124	1	3	0	59	33	0	38	50	40	37	48	20	15	0	12	0	0	0	0	0	17	9	35	33	2	31	2	38	34	0	2	17	7	23	17	23
YGL062W	876	843	113	59	425	5	232	45	258	18	306	188	385	95	135	0	1029	87	0	124	955	1565	852	475	806	133	0	77	6	0	0	0	0	155	332	288	281	13	309	28	300	1099	1	332	337	93	958	490	1261
YGL063W	5	8	0	0	2	0	10	4	25	0	1	0	29	0	0	0	22	12	0	5	1	11	6	10	12	0	0	6	0	0	0	0	0	6	2	40	50	1	0	0	8	4	0	0	56	4	10	1	8
YGL064C	17	22	6	7	43	0	27	17	5	0	8	5	94	2	7	0	9	13	0	27	14	22	11	23	19	0	0	13	2	0	0	0	0	6	2	69	38	0	1	0	13	23	0	17	15	6	8	24	13
YGL065C	57	30	28	9	84	0	37	9	54	1	27	12	73	6	9	0	31	33	0	47	106	45	32	53	29	9	0	11	1	0	0	0	0	10	56	61	50	1	11	4	8	59	0	7	49	10	45	32	57
YGL066W	28	24	4	3	35	0	26	10	10	0	9	12	58	7	17	0	9	17	0	53	42	38	34	17	27	4	0	6	3	0	0	0	0	14	23	34	52	0	14	0	0	19	0	22	20	13	63	14	24
YGL067W	72	39	23	14	104	0	79	16	162	0	18	35	200	9	13	0	53	55	0	88	31	95	27	123	57	8	0	27	5	0	0	1	0	36	140	181	143	1	47	1	41	47	0	48	122	19	30	51	48
YGL068W	95	68	54	21	224	0	177	83	165	11	61	61	489	21	65	0	100	153	0	94	94	120	67	177	116	36	0	84	2	0	0	0	0	47	108	195	240	13	61	6	25	91	0	197	128	41	216	66	72
YGL069C
YGL070C	40	39	15	12	79	0	50	21	38	3	9	21	216	12	22	0	37	40	0	39	14	43	17	92	33	5	0	17	0	0	0	0	0	11	40	126	102	0	27	2	40	68	0	64	44	12	97	49	41
YGL071W	59	57	24	5	91	0	54	9	147	6	50	13	174	7	18	0	85	59	0	66	17	176	53	83	126	16	0	19	3	0	0	0	0	15	48	130	133	0	70	3	62	101	0	62	76	37	84	0	105
YGL072C
YGL073W	77	86	37	31	139	4	87	17	154	6	25	22	238	6	18	0	99	59	0	55	97	127	78	125	121	20	0	28	1	0	0	0	0	43	136	162	207	5	37	9	110	75	0	27	181	20	95	64	74
YGL074C
YGL075C	3	4	1	0	6	0	4	3	42	3	3	1	23	0	0	0	15	4	0	10	0	9	3	19	6	3	0	0	0	0	0	0	0	0	18	0	8	0	6	0	0	6	0	0	8	1	22	4	12
YGL076C
YGL077C	156	126	59	49	347	0	39	8	77	5	71	75	115	18	35	0	247	36	0	37	179	213	147	167	126	65	0	24	2	1	0	0	0	78	127	104	96	1	40	6	72	208	0	163	105	65	157	88	161
YGL078C	117	127	3	4	29	0	210	126	31	14	16	19	428	11	31	0	50	194	0	271	23	209	45	127	46	9	0	71	1	0	0	0	0	5	34	322	300	4	30	9	33	195	0	109	74	10	125	34	145
YGL079W	27	29	14	4	80	1	20	14	20	1	6	17	74	14	11	0	48	10	0	35	9	29	13	29	24	0	0	3	0	0	0	0	0	19	74	67	54	0	0	9	39	42	0	23	49	3	18	18	18
YGL080W	174	112	97	27	280	1	206	63	323	12	55	123	243	22	48	0	283	142	0	191	204	226	132	150	186	19	0	29	1	0	0	0	0	73	304	264	263	4	117	11	154	137	0	109	216	34	139	69	122
YGL081W	3	0	3	1	0	0	0	1	26	0	2	2	0	0	0	0	15	1	0	7	0	1	10	5	0	3	0	0	0	0	0	0	0	4	27	7	4	0	0	0	1	4	0	0	53	2	0	0	1
YGL082W	32	40	20	11	101	0	23	2	30	0	10	19	55	4	11	0	72	9	0	22	26	29	22	18	34	2	0	4	0	0	0	0	0	16	37	26	13	0	9	1	31	30	0	14	26	13	16	15	22
YGL083W	31	27	14	2	31	0	25	12	18	1	33	25	92	13	10	0	46	6	0	18	90	48	12	60	25	4	0	10	0	0	0	0	0	5	49	104	55	0	11	1	31	40	0	5	69	5	71	30	26
YGL084C	66	45	50	12	99	5	68	27	40	2	33	23	151	11	14	0	91	64	0	57	87	122	57	28	88	17	0	20	1	0	0	0	0	25	58	173	91	0	36	7	38	83	0	22	128	17	58	42	68
YGL085W	40	29	22	7	43	0	14	14	46	4	12	16	13	1	6	0	61	16	0	9	24	34	12	36	11	5	0	9	1	0	0	0	0	12	60	51	13	5	24	0	6	21	0	13	59	15	85	23	19
YGL086W	59	73	24	6	25	0	68	33	36	1	8	11	267	10	10	0	41	46	0	57	149	68	88	56	55	15	0	9	2	0	0	1	0	14	33	153	174	3	42	0	1	89	1	32	78	19	87	35	53
YGL087C	184	134	87	39	352	1	131	36	229	4	125	124	293	41	48	0	289	116	0	138	200	214	163	200	276	53	0	29	4	0	0	0	0	85	219	145	170	3	105	3	145	182	0	70	189	62	162	84	132
YGL088W
YGL089C	2	0	2	0	0	0	0	0	0	0	0	3	0	0	0	0	12	2	0	9	0	5	0	0	0	4	0	0	0	0	0	0	0	3	4	3	0	0	0	0	0	0	0	0	8	0	0	0	0
YGL090W	7	9	6	4	19	0	1	0	6	0	0	7	8	2	0	0	1	0	0	0	7	5	8	6	4	0	0	1	0	0	0	0	0	0	28	0	7	0	7	0	2	6	0	21	14	2	13	6	10
YGL091C	62	68	37	32	196	0	53	27	151	1	22	48	161	21	18	0	92	46	0	50	104	68	44	92	29	20	0	17	0	0	0	0	0	27	149	94	130	2	40	9	73	48	0	36	127	26	52	33	52
YGL092W	82	79	12	13	66	0	79	30	72	1	29	12	257	8	14	0	44	58	0	36	67	146	51	54	54	7	0	14	7	0	0	0	0	17	31	149	104	8	12	8	41	89	0	21	41	16	98	20	67
YGL093W	54	55	20	22	114	0	36	19	152	0	21	23	93	11	10	0	114	24	0	45	67	53	50	84	75	17	0	9	0	0	0	0	0	30	50	58	62	1	28	0	32	77	1	40	153	25	69	34	37
YGL094C	78	51	19	12	59	0	90	17	21	5	32	22	79	5	17	0	63	49	0	28	56	74	35	61	47	12	0	9	0	0	0	0	0	9	19	91	58	1	12	2	24	86	0	21	44	2	28	40	45
YGL095C	59	40	26	10	126	2	51	12	75	1	15	33	142	4	14	0	169	26	0	51	48	74	28	83	29	26	0	24	7	1	0	0	0	14	97	112	104	2	29	2	50	55	0	34	64	28	38	22	45
YGL096W	50	21	64	27	128	0	8	7	130	13	88	64	47	0	9	0	105	3	0	16	98	40	34	31	45	14	0	3	0	0	0	0	0	45	212	35	16	3	29	4	38	66	0	5	127	30	106	65	66
YGL097W	99	91	18	12	92	0	181	59	78	13	37	32	449	8	53	4	76	154	1	78	125	116	65	161	76	46	2	53	3	5	5	3	0	33	112	432	324	1	39	12	18	99	11	72	158	28	71	51	67
YGL098W	6	3	3	4	9	0	4	2	15	0	5	2	19	0	4	0	13	0	0	1	0	2	8	0	1	1	0	0	0	0	0	0	0	2	28	10	6	0	0	0	4	3	0	0	4	0	4	8	6
YGL099W	96	53	2	4	27	0	209	84	52	9	45	15	435	8	25	0	44	112	0	127	18	137	76	113	58	19	0	19	0	0	0	0	0	15	66	411	266	3	76	15	5	98	0	31	71	5	36	24	84
YGL100W	123	115	26	20	271	0	159	55	216	9	85	67	375	37	66	0	82	146	0	39	139	229	108	314	164	41	0	45	1	0	0	0	0	48	213	363	280	4	111	10	99	156	0	122	209	55	185	85	150
YGL101W	53	60	28	28	182	0	64	27	61	8	40	36	120	11	24	0	70	19	0	27	121	98	36	76	56	14	0	8	1	0	0	0	0	49	63	107	49	1	36	1	32	57	0	36	76	24	50	58	71
YGL102C
YGL103W	1723	1421	326	283	1775	17	5789	1747	1315	287	763	547	16484	283	1096	3	1028	5178	0	4286	2070	2498	1893	2264	2442	453	0	1393	46	1	4	0	1	515	1404	10673	8819	53	770	289	321	1829	1	2766	1443	348	2371	1213	1269
YGL104C	17	54	28	5	56	2	15	9	88	0	3	16	57	6	7	0	102	15	0	8	19	33	22	41	27	6	0	3	1	0	0	0	0	14	163	21	16	2	7	0	55	49	0	1	58	8	61	15	32
YGL105W	560	494	80	54	612	3	904	284	477	66	208	138	2779	107	192	2	439	589	0	550	518	885	421	598	563	111	0	257	6	0	1	0	0	109	419	1888	1333	18	315	65	86	535	0	412	425	97	433	262	655
YGL106W	230	211	69	45	517	9	486	107	252	23	137	121	1013	54	84	0	298	361	0	202	298	398	242	433	239	37	0	84	0	0	0	2	0	119	380	615	502	5	217	21	198	276	0	166	303	81	293	168	291
YGL107C	46	62	8	0	63	0	40	29	37	7	17	27	137	5	7	0	35	63	0	52	28	71	41	63	63	18	0	27	0	0	0	0	0	17	29	67	78	1	15	5	4	83	0	76	45	34	72	37	78
YGL108C	31	20	13	15	55	0	39	22	30	2	19	14	93	1	13	0	14	28	0	15	42	24	13	23	16	16	0	8	0	0	0	0	0	12	44	41	73	0	30	0	34	24	0	32	40	9	70	19	24
YGL109W
YGL110C	44	51	23	10	61	0	52	23	23	0	11	14	85	7	10	0	70	37	0	39	38	92	63	25	48	12	0	6	0	0	0	0	0	20	44	64	68	1	35	2	42	60	0	20	51	16	74	22	26
YGL111W	84	49	5	4	16	1	163	54	42	7	11	6	266	12	14	0	43	79	0	80	58	115	51	78	46	4	0	29	1	0	0	0	0	8	40	230	175	2	3	5	48	63	0	24	63	10	50	36	52
YGL112C	93	97	21	26	133	0	166	31	110	3	32	46	292	22	44	0	61	77	0	69	65	112	47	156	73	14	0	22	0	0	0	0	0	51	183	194	152	2	68	9	38	80	0	32	183	34	149	51	98
YGL113W	29	20	7	1	21	1	60	22	48	1	9	1	74	2	7	0	51	27	0	26	35	44	21	45	45	10	0	16	0	0	0	0	0	15	47	68	51	2	20	1	44	38	0	33	58	10	22	35	41
YGL114W	85	100	17	20	149	2	60	16	161	2	46	37	112	18	37	0	151	37	0	72	95	126	57	109	128	9	0	14	1	0	0	0	0	24	176	127	88	1	55	2	32	89	0	39	145	15	145	44	73
YGL115W	67	85	65	44	280	1	131	49	148	10	58	72	414	10	55	0	204	97	0	110	268	117	62	186	132	39	0	59	1	0	0	0	0	57	52	272	246	2	76	5	19	55	0	115	132	45	146	76	69
YGL116W	53	53	16	5	89	0	14	14	38	3	23	13	60	7	13	0	24	33	0	68	78	62	35	23	39	12	0	10	1	0	1	0	0	5	24	66	59	2	11	0	20	61	0	0	51	19	53	31	34
YGL117W	124	155	65	21	150	0	17	0	281	0	25	39	48	41	94	0	158	17	0	85	163	226	100	456	169	10	0	27	5	0	0	0	0	63	252	32	17	10	125	0	24	104	0	171	288	25	77	34	117
YGL118C
YGL119W	38	34	4	3	33	0	38	10	6	0	1	9	34	0	9	0	38	10	0	13	53	52	8	25	16	5	0	7	1	0	0	0	0	9	38	42	60	1	1	0	1	27	0	7	42	12	14	14	22
YGL120C	157	124	7	0	24	2	286	128	79	12	15	14	576	28	42	0	105	215	0	140	57	238	54	183	64	8	0	60	0	0	0	0	3	6	55	701	355	1	37	7	56	151	0	73	138	11	103	23	137
YGL121C	98	83	34	22	126	0	0	4	89	0	76	14	0	9	5	0	141	0	0	3	90	153	156	56	293	41	0	7	0	0	0	0	0	37	140	10	3	2	4	1	31	111	0	15	106	5	81	38	46
YGL122C	109	91	29	34	126	6	215	72	153	21	50	37	378	14	25	23	89	120	3	60	112	164	83	161	103	33	6	40	3	7	7	6	10	72	158	387	263	12	110	42	98	124	7	93	165	43	149	94	116
YGL123W	908	895	145	108	910	2	4449	1311	640	279	284	335	10572	175	647	0	644	3333	1	2497	774	1451	811	1355	903	229	9	1072	25	13	7	0	5	224	818	7416	5885	32	404	325	137	968	5	1652	617	188	1063	696	749
YGL124C	176	146	84	22	308	1	61	19	439	1	39	45	88	2	83	0	299	38	0	94	204	219	177	577	228	11	1	7	7	0	0	0	0	61	447	109	51	11	187	1	130	137	0	66	347	49	62	72	165
YGL125W	51	70	21	3	81	0	7	1	52	1	18	19	6	6	29	1	148	4	0	10	99	63	18	82	27	13	5	3	1	0	2	0	0	24	55	4	6	0	2	0	72	76	3	39	25	10	43	25	35
YGL126W	57	40	12	2	57	3	96	28	75	10	40	10	196	9	10	2	52	96	0	53	65	61	70	74	71	28	0	38	0	0	0	1	1	9	42	247	92	3	80	4	24	104	1	57	77	12	145	46	64
YGL127C	190	153	207	101	560	0	248	80	471	9	69	138	413	40	42	1	320	138	1	88	89	235	126	248	172	30	0	40	2	0	0	0	1	240	648	371	281	2	228	10	265	162	0	107	532	196	156	79	125
YGL128C	56	34	36	9	60	0	24	13	93	0	21	25	76	3	11	0	100	34	0	28	59	41	33	9	39	5	0	9	0	0	0	0	0	18	89	46	42	3	38	0	70	49	0	0	64	14	90	22	27
YGL129C	83	71	34	9	125	0	84	24	60	3	37	14	234	14	14	0	73	55	0	68	45	128	60	63	82	22	0	60	1	0	0	0	0	25	70	147	178	5	29	6	24	76	0	106	75	25	73	58	64
YGL130W	72	59	25	23	167	2	87	21	153	10	33	30	249	16	19	0	127	39	0	90	74	72	74	132	99	26	0	27	2	0	0	0	0	36	203	207	122	4	53	4	101	78	0	32	176	40	89	46	88
YGL131C	14	5	4	2	1	0	4	4	11	0	2	2	5	0	1	0	13	6	0	2	13	12	8	0	8	0	0	2	0	0	0	0	0	9	0	17	11	0	0	0	24	10	0	0	4	2	0	6	4
YGL132W
YGL133W	51	44	5	15	39	3	47	22	19	1	15	18	92	3	17	0	33	24	0	51	38	63	56	29	50	2	0	10	0	0	0	0	0	14	31	80	62	0	29	2	11	68	0	27	53	15	59	28	69
YGL134W	20	22	8	5	74	0	24	13	41	0	11	7	40	3	5	0	23	17	0	15	21	36	11	32	31	12	0	4	0	0	0	0	0	7	21	30	49	0	7	0	16	31	0	13	26	2	32	21	29
YGL135W	948	825	100	76	480	4	3313	1016	435	130	353	291	6043	143	704	1	409	2671	0	1692	937	1446	852	850	907	216	0	714	6	0	0	0	0	177	505	3990	3295	20	291	107	140	1075	0	1201	470	157	1005	668	820
YGL136C	56	41	18	9	15	0	24	4	38	1	15	16	65	7	7	0	68	24	0	31	34	43	14	27	52	6	0	12	0	0	0	0	0	14	70	49	37	2	37	1	39	73	0	21	51	5	26	29	48
YGL137W	213	207	89	33	236	0	365	58	177	10	76	97	811	70	51	0	343	184	0	231	170	284	131	321	173	40	0	85	2	0	0	0	0	108	267	798	457	5	113	21	38	235	0	148	258	75	252	130	199
YGL138C	1	0	2	0	0	0	0	1	0	0	0	0	7	0	0	0	0	0	0	0	0	3	1	0	0	0	0	2	0	0	0	0	0	0	0	0	0	0	0	0	0	5	0	0	0	0	0	3	0
YGL139W	36	29	2	0	36	0	25	16	48	0	15	5	119	3	8	0	25	25	0	40	23	42	23	23	29	7	0	9	1	0	0	0	0	21	3	71	88	1	14	4	0	33	0	28	7	10	0	12	26
YGL140C	184	175	60	12	142	3	91	28	146	9	57	66	180	2	18	0	232	68	0	53	115	259	110	141	146	36	0	14	2	0	0	0	0	50	161	102	95	2	70	4	112	202	0	79	128	29	164	48	197
YGL141W	63	47	25	5	72	0	40	17	59	9	17	25	88	9	7	0	122	30	0	26	30	78	61	51	96	8	0	9	0	0	0	0	0	18	135	64	54	1	31	2	118	54	0	16	59	11	17	18	58
YGL142C	44	68	30	20	148	1	65	17	142	8	36	43	115	10	9	0	95	47	0	33	113	90	64	111	82	17	0	17	0	0	0	0	0	17	72	132	86	2	42	10	34	54	0	47	196	22	96	24	55
YGL143C	18	39	15	14	105	0	23	7	103	0	13	7	75	6	9	0	29	6	0	20	51	43	37	62	50	5	0	13	1	0	0	0	0	13	31	65	22	1	53	1	26	53	0	26	108	16	44	14	21
YGL144C	29	39	4	2	7	0	25	8	71	7	8	6	78	12	7	0	29	7	0	3	20	28	33	46	30	2	0	14	0	0	0	0	0	5	34	80	71	0	41	0	28	29	0	28	109	2	47	7	24
YGL145W	64	66	14	10	105	0	65	23	33	1	32	20	135	4	17	0	43	49	0	62	33	78	57	84	90	12	0	22	2	0	0	0	0	28	63	113	114	0	31	0	41	60	0	22	83	9	49	10	74
YGL146C	0	0	5	3	0	0	0	0	21	0	0	3	0	0	0	0	0	0	0	0	0	0	0	0	0	0	0	0	0	0	0	0	0	0	1	0	0	0	6	0	0	3	0	0	6	1	0	0	0
YGL147C	553	383	37	37	271	3	2748	765	199	191	126	169	5456	34	286	1	326	2146	3	1400	487	682	239	358	459	72	0	460	6	0	2	4	3	73	285	3150	3025	25	176	267	55	559	3	491	211	55	446	287	506
YGL148W	497	410	60	55	377	14	753	169	203	29	136	134	2091	95	307	0	352	594	1	653	412	581	313	751	543	74	0	240	2	0	0	0	0	131	280	1801	1274	14	170	47	45	435	2	880	360	114	336	282	354
YGL149W
YGL150C	94	99	31	8	95	0	163	26	43	4	37	28	308	19	19	0	59	103	0	113	45	125	91	88	106	21	0	22	0	0	0	0	0	43	151	284	137	4	41	20	36	135	0	129	114	11	64	55	154
YGL151W	76	46	30	22	61	3	112	28	55	2	46	33	215	7	21	0	40	70	0	63	29	85	81	57	79	17	0	21	1	0	0	0	0	25	82	130	135	1	37	9	40	106	0	13	108	3	38	28	74
YGL152C
YGL153W	30	44	18	9	58	0	52	8	23	0	17	19	83	7	17	0	32	46	0	53	41	61	53	44	40	24	0	9	0	0	0	0	0	13	48	95	54	2	35	1	32	30	0	34	74	10	24	19	42
YGL154C	38	23	30	17	56	0	22	2	70	0	19	34	34	1	16	0	84	10	0	27	63	67	20	81	37	0	0	6	0	0	0	0	0	14	106	24	25	1	25	3	37	25	0	24	94	20	80	14	20
YGL155W	35	24	13	2	75	0	40	17	48	0	18	12	94	9	8	0	73	59	0	59	6	50	40	58	39	0	0	7	1	0	0	0	0	11	75	89	40	1	21	5	22	35	0	16	43	12	26	11	31
YGL156W	78	86	11	13	27	2	5	2	29	6	34	21	15	2	5	0	88	2	0	36	87	75	78	35	121	20	0	2	1	0	0	0	0	11	63	24	18	4	0	3	32	79	0	0	41	13	98	35	79
YGL157W	51	35	23	18	147	0	52	7	43	0	11	52	86	3	17	0	165	19	0	49	90	97	33	66	47	15	0	16	0	0	0	0	0	33	83	36	17	1	11	0	85	33	0	35	59	20	70	14	36
YGL158W	3	1	0	0	4	0	2	6	6	0	1	14	2	0	2	0	14	0	0	0	0	1	5	14	0	0	0	1	0	0	0	0	0	0	50	6	15	0	0	0	0	3	0	0	0	0	0	0	3
[truncated: 4,651 more rows]
[truncated: 1,587 more columns]
